# Supplementary material
Source: ML conference proceedings conference paper supplement (https://proceedings.neurips.cc/paper_files/paper/2021/hash/654516d1b4df6917094de807156adc14-Abstract.html)
Supplement: Supplementary file 1 [file 654516d1b4df6917094de807156adc14-Supplemental.zip]

Archive with 356 entries (328 files):
- neurips-supplementary/
- neurips-supplementary/.DS_Store
- __MACOSX/neurips-supplementary/._.DS_Store
- neurips-supplementary/Attention-figures/
- neurips-supplementary/Supplementary.pdf
- __MACOSX/neurips-supplementary/._Supplementary.pdf
- neurips-supplementary/codes/
- neurips-supplementary/Attention-figures/.DS_Store
- __MACOSX/neurips-supplementary/Attention-figures/._.DS_Store
- neurips-supplementary/Attention-figures/newyork - Attn-All.jpg
- neurips-supplementary/Attention-figures/6x6- Attn-time decay.pdf
- neurips-supplementary/Attention-figures/6x6- Attn-cone decay.pdf
- __MACOSX/neurips-supplementary/Attention-figures/._6x6- Attn-cone decay.pdf
- neurips-supplementary/Attention-figures/6x6 - Attn-All.pdf
- __MACOSX/neurips-supplementary/Attention-figures/._6x6 - Attn-All.pdf
- neurips-supplementary/Attention-figures/6x6- Attn-normal.pdf
- neurips-supplementary/Attention-figures/newyork - Attn-cone decay.pdf
- __MACOSX/neurips-supplementary/Attention-figures/._newyork - Attn-cone decay.pdf
- neurips-supplementary/Attention-figures/newyork - Attn-cone decay.jpg
- neurips-supplementary/Attention-figures/6x6 - fig-Tw-attnA.pdf
- neurips-supplementary/codes/run_baseline.py
- __MACOSX/neurips-supplementary/codes/._run_baseline.py
- neurips-supplementary/codes/construct_sample.py
- __MACOSX/neurips-supplementary/codes/._construct_sample.py
- neurips-supplementary/codes/pretrain.py
- __MACOSX/neurips-supplementary/codes/._pretrain.py
- neurips-supplementary/codes/lit_agent.py
- __MACOSX/neurips-supplementary/codes/._lit_agent.py
- neurips-supplementary/codes/model_test.py
- __MACOSX/neurips-supplementary/codes/._model_test.py
- neurips-supplementary/codes/.DS_Store
- __MACOSX/neurips-supplementary/codes/._.DS_Store
- neurips-supplementary/codes/config.py
- __MACOSX/neurips-supplementary/codes/._config.py
- neurips-supplementary/codes/frontend/
- neurips-supplementary/codes/requirements.txt
- __MACOSX/neurips-supplementary/codes/._requirements.txt
- neurips-supplementary/codes/anon_env.py
- __MACOSX/neurips-supplementary/codes/._anon_env.py
- neurips-supplementary/codes/DePT_src/
- __MACOSX/neurips-supplementary/codes/._DePT_src
- neurips-supplementary/codes/runexp.py
- __MACOSX/neurips-supplementary/codes/._runexp.py
- neurips-supplementary/codes/baseline/
- neurips-supplementary/codes/updater.py
- __MACOSX/neurips-supplementary/codes/._updater.py
- neurips-supplementary/codes/generator.py
- __MACOSX/neurips-supplementary/codes/._generator.py
- neurips-supplementary/codes/simulator.dockerfile
- neurips-supplementary/codes/pipeline.py
- __MACOSX/neurips-supplementary/codes/._pipeline.py
- neurips-supplementary/codes/simple_dqn_agent.py
- __MACOSX/neurips-supplementary/codes/._simple_dqn_agent.py
- neurips-supplementary/codes/agent.py
- neurips-supplementary/codes/run_batch.py
- neurips-supplementary/codes/model_pool.py
- __MACOSX/neurips-supplementary/codes/._model_pool.py
- neurips-supplementary/codes/network_agent.py
- __MACOSX/neurips-supplementary/codes/._network_agent.py
- neurips-supplementary/codes/run_baseline_batch.py
- __MACOSX/neurips-supplementary/codes/._run_baseline_batch.py
- neurips-supplementary/codes/summary_multi_anon.py
- neurips-supplementary/codes/script.py
- __MACOSX/neurips-supplementary/codes/._script.py
- neurips-supplementary/codes/simple_dqn_one_agent.py
- __MACOSX/neurips-supplementary/codes/._simple_dqn_one_agent.py
- neurips-supplementary/codes/data/
- neurips-supplementary/codes/CoLight_agent.py
- __MACOSX/neurips-supplementary/codes/._CoLight_agent.py
- neurips-supplementary/codes/frontend/.DS_Store
- __MACOSX/neurips-supplementary/codes/frontend/._.DS_Store
- neurips-supplementary/codes/frontend/web/
- neurips-supplementary/codes/frontend/pixi/
- neurips-supplementary/codes/DePT_src/res0523-TwAttn-normal.npy
- neurips-supplementary/codes/DePT_src/.DS_Store
- __MACOSX/neurips-supplementary/codes/DePT_src/._.DS_Store
- neurips-supplementary/codes/DePT_src/dataprep.py
- __MACOSX/neurips-supplementary/codes/DePT_src/._dataprep.py
- neurips-supplementary/codes/DePT_src/requirements.txt
- __MACOSX/neurips-supplementary/codes/DePT_src/._requirements.txt
- neurips-supplementary/codes/DePT_src/Updater_DePT.py
- __MACOSX/neurips-supplementary/codes/DePT_src/._Updater_DePT.py
- neurips-supplementary/codes/DePT_src/TwAttn-2.pdf
- neurips-supplementary/codes/DePT_src/epsilon.npy
- neurips-supplementary/codes/DePT_src/TwAttn-1.pdf
- neurips-supplementary/codes/DePT_src/model.py
- __MACOSX/neurips-supplementary/codes/DePT_src/._model.py
- neurips-supplementary/codes/DePT_src/utils.py
- __MACOSX/neurips-supplementary/codes/DePT_src/._utils.py
- neurips-supplementary/codes/DePT_src/tmp_tt_attnNormal.npy
- neurips-supplementary/codes/DePT_src/res0523-TwAttn-time.npy
- neurips-supplementary/codes/DePT_src/DePT_agent.py
- __MACOSX/neurips-supplementary/codes/DePT_src/._DePT_agent.py
- neurips-supplementary/codes/DePT_src/fig-attnA.pdf
- neurips-supplementary/codes/DePT_src/posDiff.npy
- neurips-supplementary/codes/DePT_src/attn_normal.npy
- neurips-supplementary/codes/DePT_src/tmp_tt_causDecay.npy
- neurips-supplementary/codes/DePT_src/tmp_Tw_attnNormal.npy
- neurips-supplementary/codes/DePT_src/timeDiff.npy
- neurips-supplementary/codes/DePT_src/tmp_tt_timeDecay.npy
- neurips-supplementary/codes/DePT_src/tmp_Tw_causDecay.npy
- neurips-supplementary/codes/DePT_src/tmp_Tw_timeDecay.npy
- neurips-supplementary/codes/DePT_src/res0523-TwAttn-caus.npy
- neurips-supplementary/codes/baseline/maxpressure_agent.py
- neurips-supplementary/codes/baseline/random_agent.py
- neurips-supplementary/codes/baseline/formula_agent.py
- neurips-supplementary/codes/baseline/network_agent_bk.py
- neurips-supplementary/codes/baseline/fixedtimeoffset_agent.py
- neurips-supplementary/codes/baseline/__pycache__/
- neurips-supplementary/codes/baseline/sotl_agent.py
- neurips-supplementary/codes/baseline/deeplight_agent_bk.py
- __MACOSX/neurips-supplementary/codes/baseline/._deeplight_agent_bk.py
- neurips-supplementary/codes/baseline/fixedtime_agent.py
- neurips-supplementary/codes/baseline/oneline.py
- neurips-supplementary/codes/baseline/sliding_formula_agent.py
- neurips-supplementary/codes/baseline/deeplight_agent.py
- __MACOSX/neurips-supplementary/codes/baseline/._deeplight_agent.py
- neurips-supplementary/codes/data/NewYork/
- __MACOSX/neurips-supplementary/codes/data/._NewYork
- neurips-supplementary/codes/data/.DS_Store
- __MACOSX/neurips-supplementary/codes/data/._.DS_Store
- neurips-supplementary/codes/data/template_lsr/
- neurips-supplementary/codes/data/template_ls/
- neurips-supplementary/codes/data/template_s/
- neurips-supplementary/codes/frontend/web/index.html
- neurips-supplementary/codes/frontend/web/render.js
- neurips-supplementary/codes/frontend/pixi/.DS_Store
- __MACOSX/neurips-supplementary/codes/frontend/pixi/._.DS_Store
- neurips-supplementary/codes/frontend/pixi/script.js
- neurips-supplementary/codes/frontend/pixi/style.css
- neurips-supplementary/codes/frontend/pixi/app.py
- neurips-supplementary/codes/frontend/pixi/templates/
- neurips-supplementary/codes/frontend/pixi/Point.js
- neurips-supplementary/codes/baseline/__pycache__/fixedtimeoffset_agent.cpython-37.opt-1.pyc
- neurips-supplementary/codes/baseline/__pycache__/fixedtime_agent.cpython-37.opt-1.pyc
- neurips-supplementary/codes/baseline/__pycache__/maxpressure_agent.cpython-36.pyc
- neurips-supplementary/codes/baseline/__pycache__/formula_agent.cpython-36.opt-1.pyc
- neurips-supplementary/codes/baseline/__pycache__/fixedtimeoffset_agent.cpython-36.pyc
- neurips-supplementary/codes/baseline/__pycache__/fixedtimeoffset_agent.cpython-36.opt-1.pyc
- neurips-supplementary/codes/baseline/__pycache__/deeplight_agent.cpython-38.pyc
- neurips-supplementary/codes/baseline/__pycache__/fixedtime_agent.cpython-36.opt-1.pyc
- neurips-supplementary/codes/baseline/__pycache__/random_agent.cpython-36.pyc
- neurips-supplementary/codes/baseline/__pycache__/formula_agent.cpython-37.opt-1.pyc
- neurips-supplementary/codes/baseline/__pycache__/sliding_formula_agent.cpython-36.pyc
- neurips-supplementary/codes/baseline/__pycache__/formula_agent.cpython-36.pyc
- neurips-supplementary/codes/baseline/__pycache__/random_agent.cpython-37.opt-1.pyc
- neurips-supplementary/codes/baseline/__pycache__/fixedtime_agent.cpython-36.pyc
- neurips-supplementary/codes/baseline/__pycache__/sliding_formula_agent.cpython-36.opt-1.pyc
- neurips-supplementary/codes/baseline/__pycache__/sotl_agent.cpython-36.pyc
- neurips-supplementary/codes/baseline/__pycache__/deeplight_agent.cpython-36.opt-1.pyc
- neurips-supplementary/codes/baseline/__pycache__/maxpressure_agent.cpython-37.opt-1.pyc
- neurips-supplementary/codes/baseline/__pycache__/sotl_agent.cpython-36.opt-1.pyc
- neurips-supplementary/codes/baseline/__pycache__/deeplight_agent.cpython-36.pyc
- neurips-supplementary/codes/baseline/__pycache__/random_agent.cpython-36.opt-1.pyc
- neurips-supplementary/codes/baseline/__pycache__/sliding_formula_agent.cpython-37.opt-1.pyc
- neurips-supplementary/codes/baseline/__pycache__/deeplight_agent.cpython-37.opt-1.pyc
- neurips-supplementary/codes/baseline/__pycache__/maxpressure_agent.cpython-36.opt-1.pyc
- neurips-supplementary/codes/baseline/__pycache__/sotl_agent.cpython-37.opt-1.pyc
- neurips-supplementary/codes/data/NewYork/16_3/
- neurips-supplementary/codes/data/NewYork/28_7/
- neurips-supplementary/codes/data/template_lsr/3_3/
- neurips-supplementary/codes/data/template_lsr/.DS_Store
- __MACOSX/neurips-supplementary/codes/data/template_lsr/._.DS_Store
- neurips-supplementary/codes/data/template_lsr/6_6/
- __MACOSX/neurips-supplementary/codes/data/template_lsr/._6_6
- neurips-supplementary/codes/data/template_lsr/10_10/
- neurips-supplementary/codes/data/template_ls/3_3/
- neurips-supplementary/codes/data/template_ls/1_1/
- neurips-supplementary/codes/data/template_ls/6/
- neurips-supplementary/codes/data/template_ls/1_2/
- neurips-supplementary/codes/data/template_s/1_1/
- neurips-supplementary/codes/data/template_s/1_10/
- neurips-supplementary/codes/data/template_s/1_3/
- neurips-supplementary/codes/data/template_s/1_2/
- neurips-supplementary/codes/frontend/pixi/templates/index.html
- neurips-supplementary/codes/data/NewYork/16_3/anon_16_3_newyork_real.json
- neurips-supplementary/codes/data/NewYork/16_3/roadnet_16_3.json
- neurips-supplementary/codes/data/NewYork/28_7/anon_28_7_newyork_real_double.json
- neurips-supplementary/codes/data/NewYork/28_7/anon_28_7_newyork_real_triple.json
- neurips-supplementary/codes/data/NewYork/28_7/roadnet_28_7.json
- neurips-supplementary/codes/data/template_lsr/3_3/roadnet_3_3.json
- neurips-supplementary/codes/data/template_lsr/3_3/anon_3_3_300_0.3_uni.json
- neurips-supplementary/codes/data/template_lsr/3_3/anon_3_3_300_0.3_bi.json
- neurips-supplementary/codes/data/template_lsr/6_6/anon_6_6_300_0.3_bi.json
- neurips-supplementary/codes/data/template_lsr/6_6/roadnet_6_6.json
- neurips-supplementary/codes/data/template_lsr/6_6/anon_6_6_300_0.3_uni.json
- neurips-supplementary/codes/data/template_lsr/10_10/anon_10_10_300_0.3_bi.json
- neurips-supplementary/codes/data/template_lsr/10_10/anon_10_10_300_0.3_uni.json
- neurips-supplementary/codes/data/template_lsr/10_10/roadnet_10_10.json
- neurips-supplementary/codes/data/template_ls/3_3/anon_3_3_100_1.0.json
- neurips-supplementary/codes/data/template_ls/3_3/roadnet_3_3.json
- neurips-supplementary/codes/data/template_ls/3_3/anon_3_3_400_1.0.json
- neurips-supplementary/codes/data/template_ls/3_3/anon_3_3_300_1.0.json
- neurips-supplementary/codes/data/template_ls/3_3/anon_3_3_600_1.0.json
- neurips-supplementary/codes/data/template_ls/3_3/anon_3_3_500_1.0.json
- neurips-supplementary/codes/data/template_ls/3_3/anon_3_3_700_1.0.json
- neurips-supplementary/codes/data/template_ls/3_3/anon_3_3_200_1.0.json
- neurips-supplementary/codes/data/template_ls/1_1/flow_1_1_500.json
- neurips-supplementary/codes/data/template_ls/1_1/cross.netccfg
- neurips-supplementary/codes/data/template_ls/1_1/cross.typ.xml
- neurips-supplementary/codes/data/template_ls/1_1/flow_1_1_700.json
- neurips-supplementary/codes/data/template_ls/1_1/flow_1_1_300.json
- neurips-supplementary/codes/data/template_ls/1_1/flow_1_1_100.json
- neurips-supplementary/codes/data/template_ls/1_1/cross.edg.xml
- neurips-supplementary/codes/data/template_ls/1_1/cross.2phases_rou01_equal_200.xml
- neurips-supplementary/codes/data/template_ls/1_1/cross.car.type.xml
- neurips-supplementary/codes/data/template_ls/1_1/cross.nod.xml
- neurips-supplementary/codes/data/template_ls/1_1/flow_1_1_400.json
- neurips-supplementary/codes/data/template_ls/1_1/flow_1_1_600.json
- neurips-supplementary/codes/data/template_ls/1_1/cross.2phases_rou01_equal_400.xml
- neurips-supplementary/codes/data/template_ls/1_1/cross.2phases_rou01_equal_600.xml
- neurips-supplementary/codes/data/template_ls/1_1/cross.2phases_rou01_equal_100.xml
- neurips-supplementary/codes/data/template_ls/1_1/flow_1_1_200.json
- neurips-supplementary/codes/data/template_ls/1_1/cross.sumocfg
- neurips-supplementary/codes/data/template_ls/1_1/cross.2phases_rou01_equal_300.xml
- neurips-supplementary/codes/data/template_ls/1_1/cross.tll.xml
- neurips-supplementary/codes/data/template_ls/1_1/cross.net.xml
- neurips-supplementary/codes/data/template_ls/1_1/roadnet_1_1.json
- neurips-supplementary/codes/data/template_ls/1_1/cross.2phases_rou01_equal_700.xml
- neurips-supplementary/codes/data/template_ls/1_1/cross.con.xml
- neurips-supplementary/codes/data/template_ls/1_1/cross.2phases_rou01_equal_500.xml
- neurips-supplementary/codes/data/template_ls/6/cross.netccfg
- neurips-supplementary/codes/data/template_ls/6/cross.typ.xml
- neurips-supplementary/codes/data/template_ls/6/cross.edg.xml
- neurips-supplementary/codes/data/template_ls/6/cross.car.type.xml
- neurips-supplementary/codes/data/template_ls/6/cross.nod.xml
- neurips-supplementary/codes/data/template_ls/6/cross.sumocfg
- neurips-supplementary/codes/data/template_ls/6/6_intersections_300_0.3_uni.xml
- neurips-supplementary/codes/data/template_ls/6/cross.tll.xml
- neurips-supplementary/codes/data/template_ls/6/cross.net.xml
- neurips-supplementary/codes/data/template_ls/6/cross.con.xml
- neurips-supplementary/codes/data/template_ls/1_2/sumo_1_2_600_0.3.xml
- neurips-supplementary/codes/data/template_ls/1_2/cross.netccfg
- neurips-supplementary/codes/data/template_ls/1_2/cross.typ.xml
- neurips-supplementary/codes/data/template_ls/1_2/sumo_1_2_600_0.6.xml
- neurips-supplementary/codes/data/template_ls/1_2/sumo_1_2_700_0.3.xml
- neurips-supplementary/codes/data/template_ls/1_2/cross.edg.xml
- neurips-supplementary/codes/data/template_ls/1_2/sumo_1_2_700_0.6.xml
- neurips-supplementary/codes/data/template_ls/1_2/cross.car.type.xml
- neurips-supplementary/codes/data/template_ls/1_2/cross.nod.xml
- neurips-supplementary/codes/data/template_ls/1_2/sumo_1_2_400_0.3.xml
- neurips-supplementary/codes/data/template_ls/1_2/sumo_1_2_400_0.6.xml
- neurips-supplementary/codes/data/template_ls/1_2/sumo_1_2_500_0.3.xml
- neurips-supplementary/codes/data/template_ls/1_2/cross.sumocfg
- neurips-supplementary/codes/data/template_ls/1_2/sumo_1_2_300_0.6.xml
- neurips-supplementary/codes/data/template_ls/1_2/cross.tll.xml
- neurips-supplementary/codes/data/template_ls/1_2/sumo_1_2_300_0.3.xml
- neurips-supplementary/codes/data/template_ls/1_2/cross.net.xml
- neurips-supplementary/codes/data/template_ls/1_2/cross.con.xml
- neurips-supplementary/codes/data/template_ls/1_2/sumo_1_2_500_0.6.xml
- neurips-supplementary/codes/data/template_s/1_1/anon_1_1_100.json
- neurips-supplementary/codes/data/template_s/1_1/anon_1_1_300.json
- neurips-supplementary/codes/data/template_s/1_1/cross.netccfg
- neurips-supplementary/codes/data/template_s/1_1/cross.typ.xml
- neurips-supplementary/codes/data/template_s/1_1/sumo_1_1_600_1.0.xml
- neurips-supplementary/codes/data/template_s/1_1/anon_1_1_700.json
- neurips-supplementary/codes/data/template_s/1_1/sumo_1_1_100_1.0.xml
- neurips-supplementary/codes/data/template_s/1_1/cross.edg.xml
- neurips-supplementary/codes/data/template_s/1_1/anon_1_1_500.json
- neurips-supplementary/codes/data/template_s/1_1/sumo_1_1_700_1.0.xml
- neurips-supplementary/codes/data/template_s/1_1/cross.car.type.xml
- neurips-supplementary/codes/data/template_s/1_1/cross.nod.xml
- neurips-supplementary/codes/data/template_s/1_1/sumo_1_1_200_1.0.xml
- neurips-supplementary/codes/data/template_s/1_1/sumo_1_1_400_1.0.xml
- neurips-supplementary/codes/data/template_s/1_1/anon_1_1_200.json
- neurips-supplementary/codes/data/template_s/1_1/cross.sumocfg
- neurips-supplementary/codes/data/template_s/1_1/anon_1_1_600.json
- neurips-supplementary/codes/data/template_s/1_1/sumo_1_1_300_1.0.xml
- neurips-supplementary/codes/data/template_s/1_1/cross.tll.xml
- neurips-supplementary/codes/data/template_s/1_1/anon_1_1_400.json
- neurips-supplementary/codes/data/template_s/1_1/cross.net.xml
- neurips-supplementary/codes/data/template_s/1_1/roadnet_1_1.json
- neurips-supplementary/codes/data/template_s/1_1/cross.con.xml
- neurips-supplementary/codes/data/template_s/1_1/sumo_1_1_500_1.0.xml
- neurips-supplementary/codes/data/template_s/1_10/anon_1_10_200_0.6.json
- neurips-supplementary/codes/data/template_s/1_10/anon_1_10_300_0.3.json
- neurips-supplementary/codes/data/template_s/1_10/anon_1_10_600_0.3.json
- neurips-supplementary/codes/data/template_s/1_10/anon_1_10_700_0.6.json
- neurips-supplementary/codes/data/template_s/1_10/anon_1_10_100_0.3.json
- neurips-supplementary/codes/data/template_s/1_10/anon_1_10_400_0.3.json
- neurips-supplementary/codes/data/template_s/1_10/anon_1_10_500_0.6.json
- neurips-supplementary/codes/data/template_s/1_10/anon_1_10_600_0.6.json
- neurips-supplementary/codes/data/template_s/1_10/anon_1_10_700_0.3.json
- neurips-supplementary/codes/data/template_s/1_10/anon_1_10_200_0.3.json
- neurips-supplementary/codes/data/template_s/1_10/anon_1_10_300_0.6.json
- neurips-supplementary/codes/data/template_s/1_10/roadnet_1_10.json
- neurips-supplementary/codes/data/template_s/1_10/anon_1_10_400_0.6.json
- neurips-supplementary/codes/data/template_s/1_10/anon_1_10_500_0.3.json
- neurips-supplementary/codes/data/template_s/1_10/anon_1_10_100_0.6.json
- neurips-supplementary/codes/data/template_s/1_3/anon_1_3_100_0.3.json
- neurips-supplementary/codes/data/template_s/1_3/anon_1_3_400_0.3.json
- neurips-supplementary/codes/data/template_s/1_3/anon_1_3_500_0.6.json
- neurips-supplementary/codes/data/template_s/1_3/roadnet_1_3.json
- neurips-supplementary/codes/data/template_s/1_3/anon_1_3_200_0.6.json
- neurips-supplementary/codes/data/template_s/1_3/anon_1_3_300_0.3.json
- neurips-supplementary/codes/data/template_s/1_3/anon_1_3_600_0.3.json
- neurips-supplementary/codes/data/template_s/1_3/anon_1_3_700_0.6.json
- neurips-supplementary/codes/data/template_s/1_3/anon_1_3_400_0.6.json
- neurips-supplementary/codes/data/template_s/1_3/anon_1_3_500_0.3.json
- neurips-supplementary/codes/data/template_s/1_3/anon_1_3_100_0.6.json
[truncated: 56 more entries]
