# Supplementary material
Source: ML conference proceedings conference paper supplement (https://proceedings.neurips.cc/paper_files/paper/2021/hash/654516d1b4df6917094de807156adc14-Abstract.html)
Supplement: Supplementary file 1 [file 654516d1b4df6917094de807156adc14-Supplemental.zip › neurips-supplementary/codes/agent.py]

import json
import os
import shutil

class Agent(object):

    def __init__(self, dic_agent_conf, dic_traffic_env_conf, dic_path, intersection_id="0"):

        self.dic_agent_conf = dic_agent_conf
        self.dic_traffic_env_conf = dic_traffic_env_conf
        self.dic_path = dic_path
        self.intersection_id = intersection_id

    def choose_action(self):

        raise NotImplementedError
