# Supplementary material
Source: ML conference proceedings conference paper supplement (https://proceedings.neurips.cc/paper_files/paper/2021/hash/654516d1b4df6917094de807156adc14-Abstract.html)
Supplement: Supplementary file 1 [file 654516d1b4df6917094de807156adc14-Supplemental.zip › neurips-supplementary/codes/baseline/deeplight_agent_bk.py]

import numpy as np
from keras import backend as K
from keras.layers import Input, Dense, Conv2D, Flatten, BatchNormalization, Activation, Multiply, Add
from keras.models import Model, model_from_json, load_model
from keras.optimizers import RMSprop
from keras.callbacks import EarlyStopping, TensorBoard
from keras.layers.merge import concatenate, add
import random
import os
import pickle

from network_agent import NetworkAgent, conv2d_bn, Selector
import json


MEMO = "Deeplight"


class DeeplightAgent(NetworkAgent):


    def __init__(self, dic_agent_conf, dic_traffic_env_conf, dic_path, cnt_round=None):

        super(DeeplightAgent, self).__init__(
            dic_agent_conf, dic_traffic_env_conf, dic_path)

        self.num_actions = self.dic_traffic_env_conf["ACTION_DIM"]

        if cnt_round:
            try UserWarning:
                self.load_model("round_" + str(cnt_round-1))
            except:
                print("fail to load model %s as q_network_bar" %("round_"+str(cnt_round-1)))
        else:
            self.q_network = self.build_network()
        #self.save_model("init_model")
        self.update_outdated = 0

        self.q_network_bar = self.build_network_from_copy(self.q_network)
        self.q_bar_outdated = 0
        if not self.dic_agent_conf["SEPARATE_MEMORY"]:
            self.memory = self.build_memory()
        else:
            self.memory = self.build_memory_separate()
        self.average_reward = None

    def reset_update_count(self):

        self.update_outdated = 0
        self.q_bar_outdated = 0

    def set_update_outdated(self):

        self.update_outdated = - 2*self.dic_agent_conf["UPDATE_PERIOD"]
        self.q_bar_outdated = 2*self.dic_agent_conf["UPDATE_Q_BAR_FREQ"]

    def convert_state_to_input(self, state):

        ''' convert a state struct to the format for neural network input'''

        return [state[feature_name]
                for feature_name in self.dic_traffic_env_conf["LIST_STATE_FEATURE"]]

    def build_network(self):

        '''Initialize a Q network'''

        # initialize feature node
        dic_input_node = {}
        for feature_name in self.dic_traffic_env_conf["LIST_STATE_FEATURE"]:
            dic_input_node[feature_name] = Input(shape=self.dic_traffic_env_conf["DIC_FEATURE_DIM"]["D_"+feature_name.upper()],
                                                     name="input_"+feature_name)

        # add cnn to image features
        dic_flatten_node = {}
        for feature_name in self.dic_traffic_env_conf["LIST_STATE_FEATURE"]:
            if len(self.dic_traffic_env_conf["DIC_FEATURE_DIM"]["D_"+feature_name.upper()]) > 1:
                dic_flatten_node[feature_name] = self._cnn_network_structure(dic_input_node[feature_name])
            else:
                dic_flatten_node[feature_name] = dic_input_node[feature_name]

        # concatenate features
        list_all_flatten_feature = []
        for feature_name in self.dic_traffic_env_conf["LIST_STATE_FEATURE"]:
            list_all_flatten_feature.append(dic_flatten_node[feature_name])
        all_flatten_feature = concatenate(list_all_flatten_feature, axis=1, name="all_flatten_feature")

        # shared dense layer
        shared_dense = self._shared_network_structure(all_flatten_feature, self.dic_agent_conf["D_DENSE"])

        # build phase selector layer
        if "cur_phase" in self.dic_traffic_env_conf["LIST_STATE_FEATURE"] and self.dic_agent_conf["PHASE_SELECTOR"]:
            list_selected_q_values = []
            for phase in range(self.num_phases):
                locals()["q_values_{0}".format(phase)] = self._separate_network_structure(
                    shared_dense, self.dic_agent_conf["D_DENSE"], self.num_actions, memo=phase)
                locals()["selector_{0}".format(phase)] = Selector(
                    phase, name="selector_{0}".format(phase))(dic_input_node["cur_phase"])
                locals()["q_values_{0}_selected".format(phase)] = Multiply(name="multiply_{0}".format(phase))(
                    [locals()["q_values_{0}".format(phase)],
                     locals()["selector_{0}".format(phase)]]
                )
                list_selected_q_values.append(locals()["q_values_{0}_selected".format(phase)])
            q_values = Add()(list_selected_q_values)
        else:
            q_values = self._separate_network_structure(shared_dense, self.dic_agent_conf["D_DENSE"], self.num_actions)

        network = Model(inputs=[dic_input_node[feature_name]
                                for feature_name in self.dic_traffic_env_conf["LIST_STATE_FEATURE"]],
                        outputs=q_values)
        network.compile(optimizer=RMSprop(lr=self.dic_agent_conf["LEARNING_RATE"]),
                        loss="mean_squared_error")
        network.summary()

        return network

    def build_memory_separate(self):
        memory_list=[]
        for i in range(self.num_phases):
            memory_list.append([[] for j in range(self.num_actions)])
        return memory_list

    def remember(self, state, action, reward, next_state):

        if self.dic_agent_conf["SEPARATE_MEMORY"]:
            ''' log the history separately '''
            self.memory[state["cur_phase"][0]][action].append([state, action, reward, next_state])
        else:
            self.memory.append([state, action, reward, next_state])

    def forget(self, if_pretrain):

        max_keep_size = int(self.dic_agent_conf["KEEP_OLD_MEMORY"] * self.dic_agent_conf["MAX_MEMORY_LEN"])

        if self.dic_agent_conf["SEPARATE_MEMORY"]:
            ''' remove the old history if the memory is too large, in a separate way '''
            for phase_i in range(self.num_phases):
                for action_i in range(self.num_actions):
                    if if_pretrain:
                        random.shuffle(self.memory[phase_i][action_i])
                    if len(self.memory[phase_i][action_i]) > self.dic_agent_conf["MAX_MEMORY_LEN"]:
                        print("length of memory (state {0}, action {1}): {2}, before forget".format(
                            phase_i, action_i, len(self.memory[phase_i][action_i])))
                        keep_size = min(max_keep_size, len(self.memory[phase_i][action_i]))
                        remain_size = self.dic_agent_conf["MAX_MEMORY_LEN"] - keep_size
                        self.memory[phase_i][action_i] = \
                            self.memory[phase_i][action_i][:keep_size] + \
                            self.memory[phase_i][action_i][-remain_size:]
                    print("length of memory (state {0}, action {1}): {2}, after forget".format(
                        phase_i, action_i, len(self.memory[phase_i][action_i])))
        else:
            if len(self.memory) > self.dic_agent_conf["MAX_MEMORY_LEN"]:
                print("length of memory: {0}, before forget".format(len(self.memory)))
                keep_size = min(max_keep_size, len(self.memory))
                remain_size = self.dic_agent_conf["MAX_MEMORY_LEN"] - keep_size
                self.memory = \
                    self.memory[:keep_size] + \
                    self.memory[-remain_size:]
            print("length of memory: {0}, after forget".format(len(self.memory)))

    def _cal_average(self, sample_memory):

        list_reward = []
        average_reward = np.zeros((self.num_phases, self.num_actions))
        for phase_i in range(self.num_phases):
            list_reward.append([])
            for action_i in range(self.num_actions):
                list_reward[phase_i].append([])
        for [state, action, reward, _] in sample_memory:
            phase = state["cur_phase"][0]
            list_reward[phase][action].append(reward)

        for phase_i in range(self.num_phases):
            for action_i in range(self.num_actions):
                if len(list_reward[phase_i][action_i]) != 0:
                    average_reward[phase_i][action_i] = np.average(list_reward[phase_i][action_i])

        return average_reward

    def _cal_average_separate(self,sample_memory):
        ''' Calculate average rewards for different cases '''

        average_reward = np.zeros((self.num_phases, self.num_actions))
        for phase_i in range(self.num_phases):
            for action_i in range(self.num_actions):
                len_sample_memory = len(sample_memory[phase_i][action_i])
                if len_sample_memory > 0:
                    list_reward = []
                    for i in range(len_sample_memory):
                        state, action, reward, _ = sample_memory[phase_i][action_i][i]
                        list_reward.append(reward)
                    average_reward[phase_i][action_i]=np.average(list_reward)
        return average_reward

    def get_sample(self, memory_slice, dic_state_feature_arrays, Y, gamma, prefix, use_average):

        len_memory_slice = len(memory_slice)

        #f_samples = open(os.path.join(self.path_set.PATH_TO_OUTPUT, "{0}_memory".format(prefix)), "a")

        for i in range(len_memory_slice):
            state, action, reward, next_state = memory_slice[i]
            for feature_name in self.dic_traffic_env_conf["LIST_STATE_FEATURE"]:
                dic_state_feature_arrays[feature_name].append(state[feature_name])


            next_estimated_reward = self._get_next_estimated_reward(next_state)

            total_reward = reward + gamma * next_estimated_reward
            if not use_average:
                state = [[state[feature]] for feature in self.dic_traffic_env_conf["LIST_STATE_FEATURE"]]
                target = self.q_network.predict(state)
            else:
                target = np.copy(np.array([self.average_reward[state["cur_phase"][0]]]))

            pre_target = np.copy(target)
            target[0][action] = total_reward
            Y.append(target[0])

            # == don't log the samples when updating the network
            #for feature_name in self.dic_traffic_env_conf["LIST_STATE_FEATURE"]:
            #    if "map" not in feature_name:
            #        f_samples.write("{0}\t".format(str(getattr(state, feature_name))))
            #f_samples.write("{0}\t{1}\t{2}\t{3}\t{4}\n".format(
            #    str(pre_target), str(target),
            #    str(action), str(reward), str(next_estimated_reward)
            #))
        #f_samples.close()

        return dic_state_feature_arrays, Y

    def train_network(self, Xs, Y, prefix, if_pretrain):

        if if_pretrain:
            epochs = self.dic_agent_conf["EPOCHS_PRETRAIN"]
        else:
            epochs = self.dic_agent_conf["EPOCHS"]
        batch_size = min(self.dic_agent_conf["BATCH_SIZE"], len(Y))

        early_stopping = EarlyStopping(
            monitor='val_loss', patience=self.dic_agent_conf["PATIENCE"], verbose=0, mode='min')

        hist = self.q_network.fit(Xs, Y, batch_size=batch_size, epochs=epochs,
                                  shuffle=False,
                                  verbose=2, validation_split=0.3, callbacks=[early_stopping])
        self.save_model(prefix)

    def update_network(self, if_pretrain, use_average, current_time):

        ''' update Q network '''

        if current_time - self.update_outdated < self.dic_agent_conf["UPDATE_PERIOD"]:
            return

        self.update_outdated = current_time

        # prepare the samples
        if if_pretrain:
            gamma = self.dic_agent_conf["GAMMA_PRETRAIN"]
            print("precision ", K.floatx())
        else:
            gamma = self.dic_agent_conf["GAMMA"]

        dic_state_feature_arrays = {}
        for feature_name in self.dic_traffic_env_conf["LIST_STATE_FEATURE"]:
            dic_state_feature_arrays[feature_name] = []
        Y = []

        # get average state-action reward
        if self.dic_agent_conf["SEPARATE_MEMORY"]:
            self.average_reward = self._cal_average_separate(self.memory)
        else:
            self.average_reward = self._cal_average(self.memory)

        # ================ sample memory ====================
        if self.dic_agent_conf["SEPARATE_MEMORY"]:
            for phase_i in range(self.num_phases):
                for action_i in range(self.num_actions):
                    sampled_memory = self._sample_memory(
                        gamma=gamma,
                        with_priority=self.dic_agent_conf["PRIORITY_SAMPLING"],
                        memory=self.memory[phase_i][action_i],
                        if_pretrain=if_pretrain)
                    dic_state_feature_arrays, Y = self.get_sample(
                        sampled_memory, dic_state_feature_arrays, Y, gamma, current_time, use_average)
        else:
            sampled_memory = self._sample_memory(
                gamma=gamma,
                with_priority=self.dic_agent_conf["PRIORITY_SAMPLING"],
                memory=self.memory,
                if_pretrain=if_pretrain)
            dic_state_feature_arrays, Y = self.get_sample(
                sampled_memory, dic_state_feature_arrays, Y, gamma, current_time, use_average)
        # ================ sample memory ====================

        Xs = [np.array(dic_state_feature_arrays[feature_name]) for feature_name in self.dic_traffic_env_conf["LIST_STATE_FEATURE"]]
        Y = np.array(Y)
        sample_weight = np.ones(len(Y))
        # shuffle the training samples, especially for different phases and actions
        Xs, Y, _ = self._unison_shuffled_copies(Xs, Y, sample_weight)

        if if_pretrain:
            pickle.dump(Xs, open(os.path.join(self.path_set.PATH_TO_OUTPUT, "Xs.pkl"), "wb"))
            pickle.dump(Y, open(os.path.join(self.path_set.PATH_TO_OUTPUT, "Y.pkl"), "wb"))
        # ============================  training  =======================================

        self.train_network(Xs, Y, current_time, if_pretrain)
        self.q_bar_outdated += 1
        self.forget(if_pretrain=if_pretrain)

    def _sample_memory(self, gamma, with_priority, memory, if_pretrain):

        len_memory = len(memory)

        if not if_pretrain:
            sample_size = min(self.dic_agent_conf["SAMPLE_SIZE"], len_memory)
        else:
            sample_size = min(self.dic_agent_conf["SAMPLE_SIZE_PRETRAIN"], len_memory)

        if with_priority:
            # sample with priority
            sample_weight = []
            for i in range(len_memory):
                state, action, reward, next_state = memory[i]


                next_estimated_reward = self._get_next_estimated_reward(next_state)

                total_reward = reward + gamma * next_estimated_reward
                target = self.q_network.predict(
                    self.convert_state_to_input(state))
                pre_target = np.copy(target)
                target[0][action] = total_reward

                # get the bias of current prediction
                weight = abs(pre_target[0][action] - total_reward)
                sample_weight.append(weight)

            priority = self._cal_priority(sample_weight)
            p = random.choices(range(len(priority)), weights=priority, k=sample_size)
            sampled_memory = np.array(memory)[p]
        else:
            sampled_memory = random.sample(memory, sample_size)

        return sampled_memory

    @staticmethod
    def _cal_priority(sample_weight):
        pos_constant = 0.0001
        alpha = 1
        sample_weight_np = np.array(sample_weight)
        sample_weight_np = np.power(sample_weight_np + pos_constant, alpha) / sample_weight_np.sum()
        return sample_weight_np
