# Supplementary material
Source: ML conference proceedings conference paper supplement (https://proceedings.neurips.cc/paper_files/paper/2021/hash/654516d1b4df6917094de807156adc14-Abstract.html)
Supplement: Supplementary file 1 [file 654516d1b4df6917094de807156adc14-Supplemental.zip › neurips-supplementary/codes/baseline/random_agent.py]

import sys
sys.path.append("..")
from agent import Agent
import random


class RandomAgent(Agent):

    def __init__(self, dic_agent_conf, dic_sumo_env_conf, dic_path, cnt_round, best_round=None):

        super(RandomAgent, self).__init__(dic_agent_conf, dic_sumo_env_conf, dic_path)


    def choose_action(self, count, state):
        ''' choose the best action for current state '''

        action = random.randrange(self.dic_sumo_env_conf["NUM_PHASES"])

        return action
