# Supplementary material
Source: ML conference proceedings conference paper supplement (https://proceedings.neurips.cc/paper_files/paper/2021/hash/654516d1b4df6917094de807156adc14-Abstract.html)
Supplement: Supplementary file 1 [file 654516d1b4df6917094de807156adc14-Supplemental.zip › neurips-supplementary/codes/data/NewYork/16_3/anon_16_3_newyork_real.json]

[
{"vehicle": {"length": 5.0, "width": 2.0, "maxPosAcc": 2.0, "maxNegAcc": 4.5, "usualPosAcc": 2.0, "usualNegAcc": 4.5, "minGap": 2.5, "maxSpeed": 11.111, "headwayTime": 2}, "route": ["road_4_15_2", "road_3_15_1", "road_3_16_2", "road_2_16_3", "road_2_15_3", "road_2_14_3", "road_2_13_3", "road_2_12_3", "road_2_11_3", "road_2_10_3", "road_2_9_3", "road_2_8_3", "road_2_7_0", "road_3_7_0"], "interval": 1.0, "startTime": 0, "endTime": 0},
{"vehicle": {"length": 5.0, "width": 2.0, "maxPosAcc": 2.0, "maxNegAcc": 4.5, "usualPosAcc": 2.0, "usualNegAcc": 4.5, "minGap": 2.5, "maxSpeed": 11.111, "headwayTime": 2}, "route": ["road_4_8_2", "road_3_8_1", "road_3_9_1", "road_3_10_0"], "interval": 1.0, "startTime": 0, "endTime": 0},
{"vehicle": {"length": 5.0, "width": 2.0, "maxPosAcc": 2.0, "maxNegAcc": 4.5, "usualPosAcc": 2.0, "usualNegAcc": 4.5, "minGap": 2.5, "maxSpeed": 11.111, "headwayTime": 2}, "route": ["road_4_4_2", "road_3_4_1", "road_3_5_1", "road_3_6_1", "road_3_7_1", "road_3_8_1", "road_3_9_1", "road_3_10_1", "road_3_11_1", "road_3_12_1", "road_3_13_1", "road_3_14_1", "road_3_15_1", "road_3_16_1"], "interval": 1.0, "startTime": 0, "endTime": 0},
{"vehicle": {"length": 5.0, "width": 2.0, "maxPosAcc": 2.0, "maxNegAcc": 4.5, "usualPosAcc": 2.0, "usualNegAcc": 4.5, "minGap": 2.5, "maxSpeed": 11.111, "headwayTime": 2}, "route": ["road_3_0_1", "road_3_1_1", "road_3_2_1", "road_3_3_1", "road_3_4_1", "road_3_5_0"], "interval": 1.0, "startTime": 0, "endTime": 0},
{"vehicle": {"length": 5.0, "width": 2.0, "maxPosAcc": 2.0, "maxNegAcc": 4.5, "usualPosAcc": 2.0, "usualNegAcc": 4.5, "minGap": 2.5, "maxSpeed": 11.111, "headwayTime": 2}, "route": ["road_4_3_2", "road_3_3_1", "road_3_4_1", "road_3_5_1", "road_3_6_1", "road_3_7_1", "road_3_8_1", "road_3_9_1", "road_3_10_1", "road_3_11_0"], "interval": 1.0, "startTime": 0, "endTime": 0},
{"vehicle": {"length": 5.0, "width": 2.0, "maxPosAcc": 2.0, "maxNegAcc": 4.5, "usualPosAcc": 2.0, "usualNegAcc": 4.5, "minGap": 2.5, "maxSpeed": 11.111, "headwayTime": 2}, "route": ["road_4_5_2", "road_3_5_1", "road_3_6_1", "road_3_7_1", "road_3_8_2", "road_2_8_2", "road_1_8_1", "road_1_9_2"], "interval": 1.0, "startTime": 0, "endTime": 0},
{"vehicle": {"length": 5.0, "width": 2.0, "maxPosAcc": 2.0, "maxNegAcc": 4.5, "usualPosAcc": 2.0, "usualNegAcc": 4.5, "minGap": 2.5, "maxSpeed": 11.111, "headwayTime": 2}, "route": ["road_4_6_2", "road_3_6_1", "road_3_7_1", "road_3_8_1", "road_3_9_1", "road_3_10_1", "road_3_11_1", "road_3_12_1", "road_3_13_1", "road_3_14_1", "road_3_15_1", "road_3_16_2", "road_2_16_1"], "interval": 1.0, "startTime": 0, "endTime": 0},
{"vehicle": {"length": 5.0, "width": 2.0, "maxPosAcc": 2.0, "maxNegAcc": 4.5, "usualPosAcc": 2.0, "usualNegAcc": 4.5, "minGap": 2.5, "maxSpeed": 11.111, "headwayTime": 2}, "route": ["road_4_7_2", "road_3_7_1", "road_3_8_2", "road_2_8_3", "road_2_7_3", "road_2_6_3", "road_2_5_0", "road_3_5_1", "road_3_6_0"], "interval": 1.0, "startTime": 0, "endTime": 0},
{"vehicle": {"length": 5.0, "width": 2.0, "maxPosAcc": 2.0, "maxNegAcc": 4.5, "usualPosAcc": 2.0, "usualNegAcc": 4.5, "minGap": 2.5, "maxSpeed": 11.111, "headwayTime": 2}, "route": ["road_4_9_2", "road_3_9_1", "road_3_10_1", "road_3_11_1", "road_3_12_0"], "interval": 1.0, "startTime": 0, "endTime": 0},
{"vehicle": {"length": 5.0, "width": 2.0, "maxPosAcc": 2.0, "maxNegAcc": 4.5, "usualPosAcc": 2.0, "usualNegAcc": 4.5, "minGap": 2.5, "maxSpeed": 11.111, "headwayTime": 2}, "route": ["road_4_11_2", "road_3_11_1", "road_3_12_1", "road_3_13_0"], "interval": 1.0, "startTime": 0, "endTime": 0},
{"vehicle": {"length": 5.0, "width": 2.0, "maxPosAcc": 2.0, "maxNegAcc": 4.5, "usualPosAcc": 2.0, "usualNegAcc": 4.5, "minGap": 2.5, "maxSpeed": 11.111, "headwayTime": 2}, "route": ["road_4_12_2", "road_3_12_2", "road_2_12_2", "road_1_12_2"], "interval": 1.0, "startTime": 0, "endTime": 0},
{"vehicle": {"length": 5.0, "width": 2.0, "maxPosAcc": 2.0, "maxNegAcc": 4.5, "usualPosAcc": 2.0, "usualNegAcc": 4.5, "minGap": 2.5, "maxSpeed": 11.111, "headwayTime": 2}, "route": ["road_4_13_2", "road_3_13_1", "road_3_14_2", "road_2_14_3", "road_2_13_3", "road_2_12_3", "road_2_11_3", "road_2_10_3", "road_2_9_0", "road_3_9_1", "road_3_10_0"], "interval": 1.0, "startTime": 0, "endTime": 0},
{"vehicle": {"length": 5.0, "width": 2.0, "maxPosAcc": 2.0, "maxNegAcc": 4.5, "usualPosAcc": 2.0, "usualNegAcc": 4.5, "minGap": 2.5, "maxSpeed": 11.111, "headwayTime": 2}, "route": ["road_3_17_3", "road_3_16_2", "road_2_16_3", "road_2_15_3", "road_2_14_3", "road_2_13_3", "road_2_12_3", "road_2_11_3", "road_2_10_3", "road_2_9_3", "road_2_8_3", "road_2_7_3", "road_2_6_3", "road_2_5_3", "road_2_4_3", "road_2_3_3", "road_2_2_3", "road_2_1_0", "road_3_1_3"], "interval": 1.0, "startTime": 0, "endTime": 0},
{"vehicle": {"length": 5.0, "width": 2.0, "maxPosAcc": 2.0, "maxNegAcc": 4.5, "usualPosAcc": 2.0, "usualNegAcc": 4.5, "minGap": 2.5, "maxSpeed": 11.111, "headwayTime": 2}, "route": ["road_2_0_1", "road_2_1_2", "road_1_1_3"], "interval": 1.0, "startTime": 0, "endTime": 0},
{"vehicle": {"length": 5.0, "width": 2.0, "maxPosAcc": 2.0, "maxNegAcc": 4.5, "usualPosAcc": 2.0, "usualNegAcc": 4.5, "minGap": 2.5, "maxSpeed": 11.111, "headwayTime": 2}, "route": ["road_1_0_1", "road_1_1_0", "road_2_1_0", "road_3_1_3"], "interval": 1.0, "startTime": 0, "endTime": 0},
{"vehicle": {"length": 5.0, "width": 2.0, "maxPosAcc": 2.0, "maxNegAcc": 4.5, "usualPosAcc": 2.0, "usualNegAcc": 4.5, "minGap": 2.5, "maxSpeed": 11.111, "headwayTime": 2}, "route": ["road_0_14_0", "road_1_14_1", "road_1_15_1", "road_1_16_0", "road_2_16_0", "road_3_16_1"], "interval": 1.0, "startTime": 0, "endTime": 0},
{"vehicle": {"length": 5.0, "width": 2.0, "maxPosAcc": 2.0, "maxNegAcc": 4.5, "usualPosAcc": 2.0, "usualNegAcc": 4.5, "minGap": 2.5, "maxSpeed": 11.111, "headwayTime": 2}, "route": ["road_0_7_0", "road_1_7_0", "road_2_7_0", "road_3_7_1", "road_3_8_1", "road_3_9_1", "road_3_10_1", "road_3_11_0"], "interval": 1.0, "startTime": 0, "endTime": 0},
{"vehicle": {"length": 5.0, "width": 2.0, "maxPosAcc": 2.0, "maxNegAcc": 4.5, "usualPosAcc": 2.0, "usualNegAcc": 4.5, "minGap": 2.5, "maxSpeed": 11.111, "headwayTime": 2}, "route": ["road_0_3_0", "road_1_3_1", "road_1_4_1", "road_1_5_1", "road_1_6_1", "road_1_7_1", "road_1_8_1", "road_1_9_1", "road_1_10_1", "road_1_11_2"], "interval": 1.0, "startTime": 0, "endTime": 0},
{"vehicle": {"length": 5.0, "width": 2.0, "maxPosAcc": 2.0, "maxNegAcc": 4.5, "usualPosAcc": 2.0, "usualNegAcc": 4.5, "minGap": 2.5, "maxSpeed": 11.111, "headwayTime": 2}, "route": ["road_2_17_3", "road_2_16_3", "road_2_15_3", "road_2_14_3", "road_2_13_3", "road_2_12_3", "road_2_11_3", "road_2_10_3", "road_2_9_0", "road_3_9_0"], "interval": 1.0, "startTime": 0, "endTime": 0},
{"vehicle": {"length": 5.0, "width": 2.0, "maxPosAcc": 2.0, "maxNegAcc": 4.5, "usualPosAcc": 2.0, "usualNegAcc": 4.5, "minGap": 2.5, "maxSpeed": 11.111, "headwayTime": 2}, "route": ["road_4_9_2", "road_3_9_1", "road_3_10_1", "road_3_11_1", "road_3_12_1", "road_3_13_1", "road_3_14_1", "road_3_15_0"], "interval": 1.0, "startTime": 1, "endTime": 1},
{"vehicle": {"length": 5.0, "width": 2.0, "maxPosAcc": 2.0, "maxNegAcc": 4.5, "usualPosAcc": 2.0, "usualNegAcc": 4.5, "minGap": 2.5, "maxSpeed": 11.111, "headwayTime": 2}, "route": ["road_4_12_2", "road_3_12_1", "road_3_13_1", "road_3_14_1", "road_3_15_1", "road_3_16_1"], "interval": 1.0, "startTime": 1, "endTime": 1},
{"vehicle": {"length": 5.0, "width": 2.0, "maxPosAcc": 2.0, "maxNegAcc": 4.5, "usualPosAcc": 2.0, "usualNegAcc": 4.5, "minGap": 2.5, "maxSpeed": 11.111, "headwayTime": 2}, "route": ["road_0_6_0", "road_1_6_1", "road_1_7_0", "road_2_7_3", "road_2_6_3", "road_2_5_3", "road_2_4_2", "road_1_4_1", "road_1_5_2"], "interval": 1.0, "startTime": 3, "endTime": 3},
{"vehicle": {"length": 5.0, "width": 2.0, "maxPosAcc": 2.0, "maxNegAcc": 4.5, "usualPosAcc": 2.0, "usualNegAcc": 4.5, "minGap": 2.5, "maxSpeed": 11.111, "headwayTime": 2}, "route": ["road_3_0_1", "road_3_1_1", "road_3_2_1", "road_3_3_1", "road_3_4_1", "road_3_5_1", "road_3_6_1", "road_3_7_1", "road_3_8_1", "road_3_9_1", "road_3_10_1", "road_3_11_1", "road_3_12_1", "road_3_13_1", "road_3_14_1", "road_3_15_1", "road_3_16_1"], "interval": 1.0, "startTime": 7, "endTime": 7},
{"vehicle": {"length": 5.0, "width": 2.0, "maxPosAcc": 2.0, "maxNegAcc": 4.5, "usualPosAcc": 2.0, "usualNegAcc": 4.5, "minGap": 2.5, "maxSpeed": 11.111, "headwayTime": 2}, "route": ["road_1_17_3", "road_1_16_0", "road_2_16_1"], "interval": 1.0, "startTime": 9, "endTime": 9},
{"vehicle": {"length": 5.0, "width": 2.0, "maxPosAcc": 2.0, "maxNegAcc": 4.5, "usualPosAcc": 2.0, "usualNegAcc": 4.5, "minGap": 2.5, "maxSpeed": 11.111, "headwayTime": 2}, "route": ["road_4_3_2", "road_3_3_1", "road_3_4_1", "road_3_5_1", "road_3_6_1", "road_3_7_1", "road_3_8_1", "road_3_9_1", "road_3_10_1", "road_3_11_1", "road_3_12_1", "road_3_13_1", "road_3_14_1", "road_3_15_0"], "interval": 1.0, "startTime": 12, "endTime": 12},
{"vehicle": {"length": 5.0, "width": 2.0, "maxPosAcc": 2.0, "maxNegAcc": 4.5, "usualPosAcc": 2.0, "usualNegAcc": 4.5, "minGap": 2.5, "maxSpeed": 11.111, "headwayTime": 2}, "route": ["road_4_5_2", "road_3_5_1", "road_3_6_2", "road_2_6_3", "road_2_5_3", "road_2_4_3", "road_2_3_3", "road_2_2_3", "road_2_1_3"], "interval": 1.0, "startTime": 12, "endTime": 12},
{"vehicle": {"length": 5.0, "width": 2.0, "maxPosAcc": 2.0, "maxNegAcc": 4.5, "usualPosAcc": 2.0, "usualNegAcc": 4.5, "minGap": 2.5, "maxSpeed": 11.111, "headwayTime": 2}, "route": ["road_4_11_2", "road_3_11_1", "road_3_12_2", "road_2_12_3", "road_2_11_3", "road_2_10_3", "road_2_9_3", "road_2_8_3", "road_2_7_3", "road_2_6_3", "road_2_5_3", "road_2_4_2", "road_1_4_1", "road_1_5_2"], "interval": 1.0, "startTime": 13, "endTime": 13},
{"vehicle": {"length": 5.0, "width": 2.0, "maxPosAcc": 2.0, "maxNegAcc": 4.5, "usualPosAcc": 2.0, "usualNegAcc": 4.5, "minGap": 2.5, "maxSpeed": 11.111, "headwayTime": 2}, "route": ["road_4_4_2", "road_3_4_2", "road_2_4_2", "road_1_4_1", "road_1_5_1", "road_1_6_1", "road_1_7_1", "road_1_8_1", "road_1_9_1", "road_1_10_1", "road_1_11_2"], "interval": 1.0, "startTime": 15, "endTime": 15},
{"vehicle": {"length": 5.0, "width": 2.0, "maxPosAcc": 2.0, "maxNegAcc": 4.5, "usualPosAcc": 2.0, "usualNegAcc": 4.5, "minGap": 2.5, "maxSpeed": 11.111, "headwayTime": 2}, "route": ["road_4_2_2", "road_3_2_2", "road_2_2_3", "road_2_1_3"], "interval": 1.0, "startTime": 15, "endTime": 15},
{"vehicle": {"length": 5.0, "width": 2.0, "maxPosAcc": 2.0, "maxNegAcc": 4.5, "usualPosAcc": 2.0, "usualNegAcc": 4.5, "minGap": 2.5, "maxSpeed": 11.111, "headwayTime": 2}, "route": ["road_4_7_2", "road_3_7_1", "road_3_8_2", "road_2_8_3", "road_2_7_3", "road_2_6_3", "road_2_5_3", "road_2_4_3", "road_2_3_3", "road_2_2_3", "road_2_1_0", "road_3_1_3"], "interval": 1.0, "startTime": 17, "endTime": 17},
{"vehicle": {"length": 5.0, "width": 2.0, "maxPosAcc": 2.0, "maxNegAcc": 4.5, "usualPosAcc": 2.0, "usualNegAcc": 4.5, "minGap": 2.5, "maxSpeed": 11.111, "headwayTime": 2}, "route": ["road_3_17_3", "road_3_16_2", "road_2_16_3", "road_2_15_3", "road_2_14_3", "road_2_13_3", "road_2_12_3", "road_2_11_3", "road_2_10_3", "road_2_9_0", "road_3_9_1", "road_3_10_0"], "interval": 1.0, "startTime": 20, "endTime": 20},
{"vehicle": {"length": 5.0, "width": 2.0, "maxPosAcc": 2.0, "maxNegAcc": 4.5, "usualPosAcc": 2.0, "usualNegAcc": 4.5, "minGap": 2.5, "maxSpeed": 11.111, "headwayTime": 2}, "route": ["road_1_0_1", "road_1_1_0", "road_2_1_0", "road_3_1_3"], "interval": 1.0, "startTime": 24, "endTime": 24},
{"vehicle": {"length": 5.0, "width": 2.0, "maxPosAcc": 2.0, "maxNegAcc": 4.5, "usualPosAcc": 2.0, "usualNegAcc": 4.5, "minGap": 2.5, "maxSpeed": 11.111, "headwayTime": 2}, "route": ["road_3_0_1", "road_3_1_1", "road_3_2_1", "road_3_3_1", "road_3_4_1", "road_3_5_1", "road_3_6_1", "road_3_7_1", "road_3_8_1", "road_3_9_1", "road_3_10_1", "road_3_11_1", "road_3_12_1", "road_3_13_1", "road_3_14_1", "road_3_15_1", "road_3_16_1"], "interval": 1.0, "startTime": 26, "endTime": 26},
{"vehicle": {"length": 5.0, "width": 2.0, "maxPosAcc": 2.0, "maxNegAcc": 4.5, "usualPosAcc": 2.0, "usualNegAcc": 4.5, "minGap": 2.5, "maxSpeed": 11.111, "headwayTime": 2}, "route": ["road_3_17_3", "road_3_16_2", "road_2_16_3", "road_2_15_3", "road_2_14_3", "road_2_13_3", "road_2_12_3", "road_2_11_3", "road_2_10_3", "road_2_9_3", "road_2_8_3", "road_2_7_3", "road_2_6_3", "road_2_5_3", "road_2_4_3", "road_2_3_3", "road_2_2_3", "road_2_1_2", "road_1_1_3"], "interval": 1.0, "startTime": 26, "endTime": 26},
{"vehicle": {"length": 5.0, "width": 2.0, "maxPosAcc": 2.0, "maxNegAcc": 4.5, "usualPosAcc": 2.0, "usualNegAcc": 4.5, "minGap": 2.5, "maxSpeed": 11.111, "headwayTime": 2}, "route": ["road_4_11_2", "road_3_11_1", "road_3_12_2", "road_2_12_3", "road_2_11_3", "road_2_10_3", "road_2_9_3", "road_2_8_3", "road_2_7_3", "road_2_6_3", "road_2_5_3", "road_2_4_3", "road_2_3_3", "road_2_2_3", "road_2_1_0", "road_3_1_3"], "interval": 1.0, "startTime": 27, "endTime": 27},
{"vehicle": {"length": 5.0, "width": 2.0, "maxPosAcc": 2.0, "maxNegAcc": 4.5, "usualPosAcc": 2.0, "usualNegAcc": 4.5, "minGap": 2.5, "maxSpeed": 11.111, "headwayTime": 2}, "route": ["road_3_17_3", "road_3_16_2", "road_2_16_3", "road_2_15_3", "road_2_14_3", "road_2_13_3", "road_2_12_3", "road_2_11_3", "road_2_10_3", "road_2_9_3", "road_2_8_3", "road_2_7_3", "road_2_6_3", "road_2_5_0", "road_3_5_0"], "interval": 1.0, "startTime": 27, "endTime": 27},
{"vehicle": {"length": 5.0, "width": 2.0, "maxPosAcc": 2.0, "maxNegAcc": 4.5, "usualPosAcc": 2.0, "usualNegAcc": 4.5, "minGap": 2.5, "maxSpeed": 11.111, "headwayTime": 2}, "route": ["road_4_2_2", "road_3_2_1", "road_3_3_1", "road_3_4_1", "road_3_5_1", "road_3_6_1", "road_3_7_1", "road_3_8_1", "road_3_9_1", "road_3_10_1", "road_3_11_0"], "interval": 1.0, "startTime": 28, "endTime": 28},
{"vehicle": {"length": 5.0, "width": 2.0, "maxPosAcc": 2.0, "maxNegAcc": 4.5, "usualPosAcc": 2.0, "usualNegAcc": 4.5, "minGap": 2.5, "maxSpeed": 11.111, "headwayTime": 2}, "route": ["road_4_8_2", "road_3_8_2", "road_2_8_3", "road_2_7_3", "road_2_6_3", "road_2_5_3", "road_2_4_3", "road_2_3_3", "road_2_2_3", "road_2_1_0", "road_3_1_3"], "interval": 1.0, "startTime": 33, "endTime": 33},
{"vehicle": {"length": 5.0, "width": 2.0, "maxPosAcc": 2.0, "maxNegAcc": 4.5, "usualPosAcc": 2.0, "usualNegAcc": 4.5, "minGap": 2.5, "maxSpeed": 11.111, "headwayTime": 2}, "route": ["road_4_7_2", "road_3_7_1", "road_3_8_2", "road_2_8_3", "road_2_7_3", "road_2_6_2", "road_1_6_2"], "interval": 1.0, "startTime": 41, "endTime": 41},
{"vehicle": {"length": 5.0, "width": 2.0, "maxPosAcc": 2.0, "maxNegAcc": 4.5, "usualPosAcc": 2.0, "usualNegAcc": 4.5, "minGap": 2.5, "maxSpeed": 11.111, "headwayTime": 2}, "route": ["road_4_8_2", "road_3_8_2", "road_2_8_3", "road_2_7_3", "road_2_6_3", "road_2_5_3", "road_2_4_2", "road_1_4_1", "road_1_5_2"], "interval": 1.0, "startTime": 46, "endTime": 46},
{"vehicle": {"length": 5.0, "width": 2.0, "maxPosAcc": 2.0, "maxNegAcc": 4.5, "usualPosAcc": 2.0, "usualNegAcc": 4.5, "minGap": 2.5, "maxSpeed": 11.111, "headwayTime": 2}, "route": ["road_4_11_2", "road_3_11_1", "road_3_12_2", "road_2_12_3", "road_2_11_3", "road_2_10_3", "road_2_9_3", "road_2_8_3", "road_2_7_3", "road_2_6_3", "road_2_5_3", "road_2_4_3", "road_2_3_3", "road_2_2_3", "road_2_1_0", "road_3_1_1", "road_3_2_0"], "interval": 1.0, "startTime": 50, "endTime": 50},
{"vehicle": {"length": 5.0, "width": 2.0, "maxPosAcc": 2.0, "maxNegAcc": 4.5, "usualPosAcc": 2.0, "usualNegAcc": 4.5, "minGap": 2.5, "maxSpeed": 11.111, "headwayTime": 2}, "route": ["road_1_0_1", "road_1_1_1", "road_1_2_1", "road_1_3_1", "road_1_4_1", "road_1_5_1", "road_1_6_1", "road_1_7_1", "road_1_8_1", "road_1_9_1", "road_1_10_1", "road_1_11_1", "road_1_12_1", "road_1_13_1", "road_1_14_1", "road_1_15_0", "road_2_15_0", "road_3_15_1", "road_3_16_1"], "interval": 1.0, "startTime": 50, "endTime": 50},
{"vehicle": {"length": 5.0, "width": 2.0, "maxPosAcc": 2.0, "maxNegAcc": 4.5, "usualPosAcc": 2.0, "usualNegAcc": 4.5, "minGap": 2.5, "maxSpeed": 11.111, "headwayTime": 2}, "route": ["road_4_14_2", "road_3_14_2", "road_2_14_3", "road_2_13_3", "road_2_12_3", "road_2_11_0", "road_3_11_1", "road_3_12_0"], "interval": 1.0, "startTime": 56, "endTime": 56},
{"vehicle": {"length": 5.0, "width": 2.0, "maxPosAcc": 2.0, "maxNegAcc": 4.5, "usualPosAcc": 2.0, "usualNegAcc": 4.5, "minGap": 2.5, "maxSpeed": 11.111, "headwayTime": 2}, "route": ["road_4_4_2", "road_3_4_1", "road_3_5_1", "road_3_6_2", "road_2_6_2", "road_1_6_2"], "interval": 1.0, "startTime": 57, "endTime": 57},
{"vehicle": {"length": 5.0, "width": 2.0, "maxPosAcc": 2.0, "maxNegAcc": 4.5, "usualPosAcc": 2.0, "usualNegAcc": 4.5, "minGap": 2.5, "maxSpeed": 11.111, "headwayTime": 2}, "route": ["road_4_4_2", "road_3_4_2", "road_2_4_3", "road_2_3_3", "road_2_2_3", "road_2_1_0", "road_3_1_1", "road_3_2_0"], "interval": 1.0, "startTime": 60, "endTime": 60},
{"vehicle": {"length": 5.0, "width": 2.0, "maxPosAcc": 2.0, "maxNegAcc": 4.5, "usualPosAcc": 2.0, "usualNegAcc": 4.5, "minGap": 2.5, "maxSpeed": 11.111, "headwayTime": 2}, "route": ["road_4_5_2", "road_3_5_1", "road_3_6_0"], "interval": 1.0, "startTime": 60, "endTime": 60},
{"vehicle": {"length": 5.0, "width": 2.0, "maxPosAcc": 2.0, "maxNegAcc": 4.5, "usualPosAcc": 2.0, "usualNegAcc": 4.5, "minGap": 2.5, "maxSpeed": 11.111, "headwayTime": 2}, "route": ["road_4_6_2", "road_3_6_2", "road_2_6_3", "road_2_5_3", "road_2_4_3", "road_2_3_0", "road_3_3_0"], "interval": 1.0, "startTime": 60, "endTime": 60},
{"vehicle": {"length": 5.0, "width": 2.0, "maxPosAcc": 2.0, "maxNegAcc": 4.5, "usualPosAcc": 2.0, "usualNegAcc": 4.5, "minGap": 2.5, "maxSpeed": 11.111, "headwayTime": 2}, "route": ["road_4_7_2", "road_3_7_1", "road_3_8_2", "road_2_8_3", "road_2_7_3", "road_2_6_3", "road_2_5_3", "road_2_4_3", "road_2_3_3", "road_2_2_3", "road_2_1_0", "road_3_1_3"], "interval": 1.0, "startTime": 60, "endTime": 60},
{"vehicle": {"length": 5.0, "width": 2.0, "maxPosAcc": 2.0, "maxNegAcc": 4.5, "usualPosAcc": 2.0, "usualNegAcc": 4.5, "minGap": 2.5, "maxSpeed": 11.111, "headwayTime": 2}, "route": ["road_4_10_2", "road_3_10_2", "road_2_10_3", "road_2_9_0", "road_3_9_0"], "interval": 1.0, "startTime": 60, "endTime": 60},
{"vehicle": {"length": 5.0, "width": 2.0, "maxPosAcc": 2.0, "maxNegAcc": 4.5, "usualPosAcc": 2.0, "usualNegAcc": 4.5, "minGap": 2.5, "maxSpeed": 11.111, "headwayTime": 2}, "route": ["road_4_12_2", "road_3_12_1", "road_3_13_1", "road_3_14_0"], "interval": 1.0, "startTime": 60, "endTime": 60},
{"vehicle": {"length": 5.0, "width": 2.0, "maxPosAcc": 2.0, "maxNegAcc": 4.5, "usualPosAcc": 2.0, "usualNegAcc": 4.5, "minGap": 2.5, "maxSpeed": 11.111, "headwayTime": 2}, "route": ["road_4_13_2", "road_3_13_1", "road_3_14_2", "road_2_14_3", "road_2_13_3", "road_2_12_3", "road_2_11_3", "road_2_10_3", "road_2_9_3", "road_2_8_3", "road_2_7_3", "road_2_6_3", "road_2_5_0", "road_3_5_1", "road_3_6_0"], "interval": 1.0, "startTime": 60, "endTime": 60},
{"vehicle": {"length": 5.0, "width": 2.0, "maxPosAcc": 2.0, "maxNegAcc": 4.5, "usualPosAcc": 2.0, "usualNegAcc": 4.5, "minGap": 2.5, "maxSpeed": 11.111, "headwayTime": 2}, "route": ["road_3_17_3", "road_3_16_2", "road_2_16_3", "road_2_15_3", "road_2_14_3", "road_2_13_3", "road_2_12_3", "road_2_11_3", "road_2_10_3", "road_2_9_3", "road_2_8_3", "road_2_7_3", "road_2_6_3", "road_2_5_3", "road_2_4_3", "road_2_3_3", "road_2_2_3", "road_2_1_3"], "interval": 1.0, "startTime": 60, "endTime": 60},
{"vehicle": {"length": 5.0, "width": 2.0, "maxPosAcc": 2.0, "maxNegAcc": 4.5, "usualPosAcc": 2.0, "usualNegAcc": 4.5, "minGap": 2.5, "maxSpeed": 11.111, "headwayTime": 2}, "route": ["road_2_17_3", "road_2_16_3", "road_2_15_3", "road_2_14_3", "road_2_13_3", "road_2_12_3", "road_2_11_3", "road_2_10_3", "road_2_9_3", "road_2_8_3", "road_2_7_3", "road_2_6_3", "road_2_5_3", "road_2_4_3", "road_2_3_3", "road_2_2_3", "road_2_1_3"], "interval": 1.0, "startTime": 60, "endTime": 60},
{"vehicle": {"length": 5.0, "width": 2.0, "maxPosAcc": 2.0, "maxNegAcc": 4.5, "usualPosAcc": 2.0, "usualNegAcc": 4.5, "minGap": 2.5, "maxSpeed": 11.111, "headwayTime": 2}, "route": ["road_0_13_0", "road_1_13_0", "road_2_13_3", "road_2_12_3", "road_2_11_3", "road_2_10_3", "road_2_9_3", "road_2_8_2", "road_1_8_2"], "interval": 1.0, "startTime": 60, "endTime": 60},
{"vehicle": {"length": 5.0, "width": 2.0, "maxPosAcc": 2.0, "maxNegAcc": 4.5, "usualPosAcc": 2.0, "usualNegAcc": 4.5, "minGap": 2.5, "maxSpeed": 11.111, "headwayTime": 2}, "route": ["road_1_17_3", "road_1_16_0", "road_2_16_3", "road_2_15_3", "road_2_14_3", "road_2_13_3", "road_2_12_3", "road_2_11_3", "road_2_10_3", "road_2_9_3", "road_2_8_3", "road_2_7_3", "road_2_6_3", "road_2_5_3", "road_2_4_3", "road_2_3_3", "road_2_2_3", "road_2_1_0", "road_3_1_1", "road_3_2_0"], "interval": 1.0, "startTime": 60, "endTime": 60},
{"vehicle": {"length": 5.0, "width": 2.0, "maxPosAcc": 2.0, "maxNegAcc": 4.5, "usualPosAcc": 2.0, "usualNegAcc": 4.5, "minGap": 2.5, "maxSpeed": 11.111, "headwayTime": 2}, "route": ["road_4_2_2", "road_3_2_2", "road_2_2_3", "road_2_1_3"], "interval": 1.0, "startTime": 60, "endTime": 60},
{"vehicle": {"length": 5.0, "width": 2.0, "maxPosAcc": 2.0, "maxNegAcc": 4.5, "usualPosAcc": 2.0, "usualNegAcc": 4.5, "minGap": 2.5, "maxSpeed": 11.111, "headwayTime": 2}, "route": ["road_4_4_2", "road_3_4_1", "road_3_5_1", "road_3_6_1", "road_3_7_1", "road_3_8_1", "road_3_9_1", "road_3_10_1", "road_3_11_1", "road_3_12_0"], "interval": 1.0, "startTime": 66, "endTime": 66},
{"vehicle": {"length": 5.0, "width": 2.0, "maxPosAcc": 2.0, "maxNegAcc": 4.5, "usualPosAcc": 2.0, "usualNegAcc": 4.5, "minGap": 2.5, "maxSpeed": 11.111, "headwayTime": 2}, "route": ["road_4_9_2", "road_3_9_1", "road_3_10_1", "road_3_11_1", "road_3_12_1", "road_3_13_1", "road_3_14_1", "road_3_15_1", "road_3_16_1"], "interval": 1.0, "startTime": 66, "endTime": 66},
{"vehicle": {"length": 5.0, "width": 2.0, "maxPosAcc": 2.0, "maxNegAcc": 4.5, "usualPosAcc": 2.0, "usualNegAcc": 4.5, "minGap": 2.5, "maxSpeed": 11.111, "headwayTime": 2}, "route": ["road_1_0_1", "road_1_1_1", "road_1_2_1", "road_1_3_0", "road_2_3_0", "road_3_3_1", "road_3_4_1", "road_3_5_1", "road_3_6_0"], "interval": 1.0, "startTime": 71, "endTime": 71},
{"vehicle": {"length": 5.0, "width": 2.0, "maxPosAcc": 2.0, "maxNegAcc": 4.5, "usualPosAcc": 2.0, "usualNegAcc": 4.5, "minGap": 2.5, "maxSpeed": 11.111, "headwayTime": 2}, "route": ["road_1_0_1", "road_1_1_1", "road_1_2_1", "road_1_3_0", "road_2_3_0", "road_3_3_1", "road_3_4_1", "road_3_5_1", "road_3_6_1", "road_3_7_0"], "interval": 1.0, "startTime": 72, "endTime": 72},
{"vehicle": {"length": 5.0, "width": 2.0, "maxPosAcc": 2.0, "maxNegAcc": 4.5, "usualPosAcc": 2.0, "usualNegAcc": 4.5, "minGap": 2.5, "maxSpeed": 11.111, "headwayTime": 2}, "route": ["road_0_14_0", "road_1_14_1", "road_1_15_0", "road_2_15_3", "road_2_14_3", "road_2_13_0", "road_3_13_0"], "interval": 1.0, "startTime": 72, "endTime": 72},
{"vehicle": {"length": 5.0, "width": 2.0, "maxPosAcc": 2.0, "maxNegAcc": 4.5, "usualPosAcc": 2.0, "usualNegAcc": 4.5, "minGap": 2.5, "maxSpeed": 11.111, "headwayTime": 2}, "route": ["road_4_5_2", "road_3_5_1", "road_3_6_2", "road_2_6_2", "road_1_6_2"], "interval": 1.0, "startTime": 75, "endTime": 75},
{"vehicle": {"length": 5.0, "width": 2.0, "maxPosAcc": 2.0, "maxNegAcc": 4.5, "usualPosAcc": 2.0, "usualNegAcc": 4.5, "minGap": 2.5, "maxSpeed": 11.111, "headwayTime": 2}, "route": ["road_0_14_0", "road_1_14_1", "road_1_15_0", "road_2_15_3", "road_2_14_3", "road_2_13_3", "road_2_12_2", "road_1_12_1", "road_1_13_2"], "interval": 1.0, "startTime": 79, "endTime": 79},
{"vehicle": {"length": 5.0, "width": 2.0, "maxPosAcc": 2.0, "maxNegAcc": 4.5, "usualPosAcc": 2.0, "usualNegAcc": 4.5, "minGap": 2.5, "maxSpeed": 11.111, "headwayTime": 2}, "route": ["road_4_5_2", "road_3_5_1", "road_3_6_2", "road_2_6_3", "road_2_5_3", "road_2_4_3", "road_2_3_0", "road_3_3_1", "road_3_4_0"], "interval": 1.0, "startTime": 81, "endTime": 81},
{"vehicle": {"length": 5.0, "width": 2.0, "maxPosAcc": 2.0, "maxNegAcc": 4.5, "usualPosAcc": 2.0, "usualNegAcc": 4.5, "minGap": 2.5, "maxSpeed": 11.111, "headwayTime": 2}, "route": ["road_3_17_3", "road_3_16_2", "road_2_16_1"], "interval": 1.0, "startTime": 82, "endTime": 82},
{"vehicle": {"length": 5.0, "width": 2.0, "maxPosAcc": 2.0, "maxNegAcc": 4.5, "usualPosAcc": 2.0, "usualNegAcc": 4.5, "minGap": 2.5, "maxSpeed": 11.111, "headwayTime": 2}, "route": ["road_4_4_2", "road_3_4_1", "road_3_5_0"], "interval": 1.0, "startTime": 83, "endTime": 83},
{"vehicle": {"length": 5.0, "width": 2.0, "maxPosAcc": 2.0, "maxNegAcc": 4.5, "usualPosAcc": 2.0, "usualNegAcc": 4.5, "minGap": 2.5, "maxSpeed": 11.111, "headwayTime": 2}, "route": ["road_4_14_2", "road_3_14_2", "road_2_14_3", "road_2_13_3", "road_2_12_3", "road_2_11_3", "road_2_10_3", "road_2_9_3", "road_2_8_3", "road_2_7_3", "road_2_6_3", "road_2_5_3", "road_2_4_3", "road_2_3_0", "road_3_3_0"], "interval": 1.0, "startTime": 84, "endTime": 84},
{"vehicle": {"length": 5.0, "width": 2.0, "maxPosAcc": 2.0, "maxNegAcc": 4.5, "usualPosAcc": 2.0, "usualNegAcc": 4.5, "minGap": 2.5, "maxSpeed": 11.111, "headwayTime": 2}, "route": ["road_0_8_0", "road_1_8_1", "road_1_9_1", "road_1_10_1", "road_1_11_1", "road_1_12_1", "road_1_13_1", "road_1_14_1", "road_1_15_0", "road_2_15_0", "road_3_15_0"], "interval": 1.0, "startTime": 87, "endTime": 87},
{"vehicle": {"length": 5.0, "width": 2.0, "maxPosAcc": 2.0, "maxNegAcc": 4.5, "usualPosAcc": 2.0, "usualNegAcc": 4.5, "minGap": 2.5, "maxSpeed": 11.111, "headwayTime": 2}, "route": ["road_4_7_2", "road_3_7_1", "road_3_8_1", "road_3_9_1", "road_3_10_1", "road_3_11_1", "road_3_12_1", "road_3_13_0"], "interval": 1.0, "startTime": 87, "endTime": 87},
{"vehicle": {"length": 5.0, "width": 2.0, "maxPosAcc": 2.0, "maxNegAcc": 4.5, "usualPosAcc": 2.0, "usualNegAcc": 4.5, "minGap": 2.5, "maxSpeed": 11.111, "headwayTime": 2}, "route": ["road_3_17_3", "road_3_16_2", "road_2_16_3", "road_2_15_3", "road_2_14_3", "road_2_13_3", "road_2_12_3", "road_2_11_3", "road_2_10_3", "road_2_9_3", "road_2_8_3", "road_2_7_3", "road_2_6_3", "road_2_5_0", "road_3_5_1", "road_3_6_0"], "interval": 1.0, "startTime": 91, "endTime": 91},
{"vehicle": {"length": 5.0, "width": 2.0, "maxPosAcc": 2.0, "maxNegAcc": 4.5, "usualPosAcc": 2.0, "usualNegAcc": 4.5, "minGap": 2.5, "maxSpeed": 11.111, "headwayTime": 2}, "route": ["road_3_17_3", "road_3_16_2", "road_2_16_3", "road_2_15_3", "road_2_14_3", "road_2_13_3", "road_2_12_3", "road_2_11_3", "road_2_10_3", "road_2_9_3", "road_2_8_3", "road_2_7_3", "road_2_6_3", "road_2_5_3", "road_2_4_3", "road_2_3_0", "road_3_3_1", "road_3_4_0"], "interval": 1.0, "startTime": 97, "endTime": 97},
{"vehicle": {"length": 5.0, "width": 2.0, "maxPosAcc": 2.0, "maxNegAcc": 4.5, "usualPosAcc": 2.0, "usualNegAcc": 4.5, "minGap": 2.5, "maxSpeed": 11.111, "headwayTime": 2}, "route": ["road_0_15_0", "road_1_15_0", "road_2_15_3", "road_2_14_3", "road_2_13_3", "road_2_12_3", "road_2_11_3", "road_2_10_3", "road_2_9_3", "road_2_8_3", "road_2_7_3", "road_2_6_2", "road_1_6_1", "road_1_7_2"], "interval": 1.0, "startTime": 100, "endTime": 100},
{"vehicle": {"length": 5.0, "width": 2.0, "maxPosAcc": 2.0, "maxNegAcc": 4.5, "usualPosAcc": 2.0, "usualNegAcc": 4.5, "minGap": 2.5, "maxSpeed": 11.111, "headwayTime": 2}, "route": ["road_2_0_1", "road_2_1_0", "road_3_1_1", "road_3_2_1", "road_3_3_1", "road_3_4_1", "road_3_5_1", "road_3_6_1", "road_3_7_1", "road_3_8_1", "road_3_9_1", "road_3_10_1", "road_3_11_1", "road_3_12_0"], "interval": 1.0, "startTime": 100, "endTime": 100},
{"vehicle": {"length": 5.0, "width": 2.0, "maxPosAcc": 2.0, "maxNegAcc": 4.5, "usualPosAcc": 2.0, "usualNegAcc": 4.5, "minGap": 2.5, "maxSpeed": 11.111, "headwayTime": 2}, "route": ["road_1_17_3", "road_1_16_0", "road_2_16_1"], "interval": 1.0, "startTime": 103, "endTime": 103},
{"vehicle": {"length": 5.0, "width": 2.0, "maxPosAcc": 2.0, "maxNegAcc": 4.5, "usualPosAcc": 2.0, "usualNegAcc": 4.5, "minGap": 2.5, "maxSpeed": 11.111, "headwayTime": 2}, "route": ["road_0_5_0", "road_1_5_0", "road_2_5_0", "road_3_5_1", "road_3_6_1", "road_3_7_1", "road_3_8_0"], "interval": 1.0, "startTime": 107, "endTime": 107},
{"vehicle": {"length": 5.0, "width": 2.0, "maxPosAcc": 2.0, "maxNegAcc": 4.5, "usualPosAcc": 2.0, "usualNegAcc": 4.5, "minGap": 2.5, "maxSpeed": 11.111, "headwayTime": 2}, "route": ["road_3_0_1", "road_3_1_2", "road_2_1_2", "road_1_1_3"], "interval": 1.0, "startTime": 112, "endTime": 112},
{"vehicle": {"length": 5.0, "width": 2.0, "maxPosAcc": 2.0, "maxNegAcc": 4.5, "usualPosAcc": 2.0, "usualNegAcc": 4.5, "minGap": 2.5, "maxSpeed": 11.111, "headwayTime": 2}, "route": ["road_4_15_2", "road_3_15_1", "road_3_16_1"], "interval": 1.0, "startTime": 114, "endTime": 114},
{"vehicle": {"length": 5.0, "width": 2.0, "maxPosAcc": 2.0, "maxNegAcc": 4.5, "usualPosAcc": 2.0, "usualNegAcc": 4.5, "minGap": 2.5, "maxSpeed": 11.111, "headwayTime": 2}, "route": ["road_4_5_2", "road_3_5_1", "road_3_6_0"], "interval": 1.0, "startTime": 115, "endTime": 115},
{"vehicle": {"length": 5.0, "width": 2.0, "maxPosAcc": 2.0, "maxNegAcc": 4.5, "usualPosAcc": 2.0, "usualNegAcc": 4.5, "minGap": 2.5, "maxSpeed": 11.111, "headwayTime": 2}, "route": ["road_1_17_3", "road_1_16_0", "road_2_16_3", "road_2_15_3", "road_2_14_3", "road_2_13_3", "road_2_12_3", "road_2_11_3", "road_2_10_3", "road_2_9_0", "road_3_9_0"], "interval": 1.0, "startTime": 118, "endTime": 118},
{"vehicle": {"length": 5.0, "width": 2.0, "maxPosAcc": 2.0, "maxNegAcc": 4.5, "usualPosAcc": 2.0, "usualNegAcc": 4.5, "minGap": 2.5, "maxSpeed": 11.111, "headwayTime": 2}, "route": ["road_4_15_2", "road_3_15_1", "road_3_16_2", "road_2_16_3", "road_2_15_3", "road_2_14_3", "road_2_13_3", "road_2_12_3", "road_2_11_3", "road_2_10_3", "road_2_9_3", "road_2_8_3", "road_2_7_3", "road_2_6_3", "road_2_5_3", "road_2_4_2", "road_1_4_1", "road_1_5_2"], "interval": 1.0, "startTime": 120, "endTime": 120},
{"vehicle": {"length": 5.0, "width": 2.0, "maxPosAcc": 2.0, "maxNegAcc": 4.5, "usualPosAcc": 2.0, "usualNegAcc": 4.5, "minGap": 2.5, "maxSpeed": 11.111, "headwayTime": 2}, "route": ["road_4_8_2", "road_3_8_2", "road_2_8_3", "road_2_7_3", "road_2_6_3", "road_2_5_3", "road_2_4_3", "road_2_3_3", "road_2_2_3", "road_2_1_2", "road_1_1_3"], "interval": 1.0, "startTime": 120, "endTime": 120},
{"vehicle": {"length": 5.0, "width": 2.0, "maxPosAcc": 2.0, "maxNegAcc": 4.5, "usualPosAcc": 2.0, "usualNegAcc": 4.5, "minGap": 2.5, "maxSpeed": 11.111, "headwayTime": 2}, "route": ["road_0_8_0", "road_1_8_1", "road_1_9_0", "road_2_9_0", "road_3_9_0"], "interval": 1.0, "startTime": 120, "endTime": 120},
{"vehicle": {"length": 5.0, "width": 2.0, "maxPosAcc": 2.0, "maxNegAcc": 4.5, "usualPosAcc": 2.0, "usualNegAcc": 4.5, "minGap": 2.5, "maxSpeed": 11.111, "headwayTime": 2}, "route": ["road_3_0_1", "road_3_1_1", "road_3_2_1", "road_3_3_1", "road_3_4_0"], "interval": 1.0, "startTime": 120, "endTime": 120},
{"vehicle": {"length": 5.0, "width": 2.0, "maxPosAcc": 2.0, "maxNegAcc": 4.5, "usualPosAcc": 2.0, "usualNegAcc": 4.5, "minGap": 2.5, "maxSpeed": 11.111, "headwayTime": 2}, "route": ["road_4_3_2", "road_3_3_1", "road_3_4_1", "road_3_5_1", "road_3_6_1", "road_3_7_1", "road_3_8_1", "road_3_9_1", "road_3_10_1", "road_3_11_1", "road_3_12_1", "road_3_13_1", "road_3_14_2", "road_2_14_2", "road_1_14_1", "road_1_15_1", "road_1_16_1"], "interval": 1.0, "startTime": 120, "endTime": 120},
{"vehicle": {"length": 5.0, "width": 2.0, "maxPosAcc": 2.0, "maxNegAcc": 4.5, "usualPosAcc": 2.0, "usualNegAcc": 4.5, "minGap": 2.5, "maxSpeed": 11.111, "headwayTime": 2}, "route": ["road_4_5_2", "road_3_5_1", "road_3_6_2", "road_2_6_3", "road_2_5_3", "road_2_4_3", "road_2_3_3", "road_2_2_3", "road_2_1_3"], "interval": 1.0, "startTime": 120, "endTime": 120},
{"vehicle": {"length": 5.0, "width": 2.0, "maxPosAcc": 2.0, "maxNegAcc": 4.5, "usualPosAcc": 2.0, "usualNegAcc": 4.5, "minGap": 2.5, "maxSpeed": 11.111, "headwayTime": 2}, "route": ["road_4_6_2", "road_3_6_1", "road_3_7_0"], "interval": 1.0, "startTime": 120, "endTime": 120},
{"vehicle": {"length": 5.0, "width": 2.0, "maxPosAcc": 2.0, "maxNegAcc": 4.5, "usualPosAcc": 2.0, "usualNegAcc": 4.5, "minGap": 2.5, "maxSpeed": 11.111, "headwayTime": 2}, "route": ["road_4_7_2", "road_3_7_1", "road_3_8_1", "road_3_9_1", "road_3_10_1", "road_3_11_1", "road_3_12_0"], "interval": 1.0, "startTime": 120, "endTime": 120},
{"vehicle": {"length": 5.0, "width": 2.0, "maxPosAcc": 2.0, "maxNegAcc": 4.5, "usualPosAcc": 2.0, "usualNegAcc": 4.5, "minGap": 2.5, "maxSpeed": 11.111, "headwayTime": 2}, "route": ["road_4_9_2", "road_3_9_1", "road_3_10_2", "road_2_10_3", "road_2_9_3", "road_2_8_3", "road_2_7_0", "road_3_7_1", "road_3_8_0"], "interval": 1.0, "startTime": 120, "endTime": 120},
{"vehicle": {"length": 5.0, "width": 2.0, "maxPosAcc": 2.0, "maxNegAcc": 4.5, "usualPosAcc": 2.0, "usualNegAcc": 4.5, "minGap": 2.5, "maxSpeed": 11.111, "headwayTime": 2}, "route": ["road_4_10_2", "road_3_10_1", "road_3_11_1", "road_3_12_1", "road_3_13_1", "road_3_14_2", "road_2_14_2", "road_1_14_2"], "interval": 1.0, "startTime": 120, "endTime": 120},
{"vehicle": {"length": 5.0, "width": 2.0, "maxPosAcc": 2.0, "maxNegAcc": 4.5, "usualPosAcc": 2.0, "usualNegAcc": 4.5, "minGap": 2.5, "maxSpeed": 11.111, "headwayTime": 2}, "route": ["road_4_11_2", "road_3_11_1", "road_3_12_2", "road_2_12_3", "road_2_11_3", "road_2_10_3", "road_2_9_3", "road_2_8_3", "road_2_7_3", "road_2_6_3", "road_2_5_3", "road_2_4_2", "road_1_4_1", "road_1_5_2"], "interval": 1.0, "startTime": 120, "endTime": 120},
{"vehicle": {"length": 5.0, "width": 2.0, "maxPosAcc": 2.0, "maxNegAcc": 4.5, "usualPosAcc": 2.0, "usualNegAcc": 4.5, "minGap": 2.5, "maxSpeed": 11.111, "headwayTime": 2}, "route": ["road_4_12_2", "road_3_12_2", "road_2_12_3", "road_2_11_3", "road_2_10_3", "road_2_9_3", "road_2_8_3", "road_2_7_3", "road_2_6_3", "road_2_5_0", "road_3_5_1", "road_3_6_0"], "interval": 1.0, "startTime": 120, "endTime": 120},
{"vehicle": {"length": 5.0, "width": 2.0, "maxPosAcc": 2.0, "maxNegAcc": 4.5, "usualPosAcc": 2.0, "usualNegAcc": 4.5, "minGap": 2.5, "maxSpeed": 11.111, "headwayTime": 2}, "route": ["road_4_14_2", "road_3_14_2", "road_2_14_2", "road_1_14_1", "road_1_15_1", "road_1_16_1"], "interval": 1.0, "startTime": 120, "endTime": 120},
{"vehicle": {"length": 5.0, "width": 2.0, "maxPosAcc": 2.0, "maxNegAcc": 4.5, "usualPosAcc": 2.0, "usualNegAcc": 4.5, "minGap": 2.5, "maxSpeed": 11.111, "headwayTime": 2}, "route": ["road_3_17_3", "road_3_16_2", "road_2_16_2", "road_1_16_1"], "interval": 1.0, "startTime": 120, "endTime": 120},
{"vehicle": {"length": 5.0, "width": 2.0, "maxPosAcc": 2.0, "maxNegAcc": 4.5, "usualPosAcc": 2.0, "usualNegAcc": 4.5, "minGap": 2.5, "maxSpeed": 11.111, "headwayTime": 2}, "route": ["road_1_0_1", "road_1_1_0", "road_2_1_0", "road_3_1_3"], "interval": 1.0, "startTime": 120, "endTime": 120},
{"vehicle": {"length": 5.0, "width": 2.0, "maxPosAcc": 2.0, "maxNegAcc": 4.5, "usualPosAcc": 2.0, "usualNegAcc": 4.5, "minGap": 2.5, "maxSpeed": 11.111, "headwayTime": 2}, "route": ["road_0_9_0", "road_1_9_0", "road_2_9_0", "road_3_9_1", "road_3_10_1", "road_3_11_1", "road_3_12_1", "road_3_13_1", "road_3_14_0"], "interval": 1.0, "startTime": 120, "endTime": 120},
{"vehicle": {"length": 5.0, "width": 2.0, "maxPosAcc": 2.0, "maxNegAcc": 4.5, "usualPosAcc": 2.0, "usualNegAcc": 4.5, "minGap": 2.5, "maxSpeed": 11.111, "headwayTime": 2}, "route": ["road_0_7_0", "road_1_7_1", "road_1_8_1", "road_1_9_1", "road_1_10_1", "road_1_11_1", "road_1_12_1", "road_1_13_1", "road_1_14_2"], "interval": 1.0, "startTime": 120, "endTime": 120},
{"vehicle": {"length": 5.0, "width": 2.0, "maxPosAcc": 2.0, "maxNegAcc": 4.5, "usualPosAcc": 2.0, "usualNegAcc": 4.5, "minGap": 2.5, "maxSpeed": 11.111, "headwayTime": 2}, "route": ["road_0_3_0", "road_1_3_0", "road_2_3_0", "road_3_3_1", "road_3_4_1", "road_3_5_1", "road_3_6_1", "road_3_7_1", "road_3_8_1", "road_3_9_1", "road_3_10_1", "road_3_11_1", "road_3_12_0"], "interval": 1.0, "startTime": 120, "endTime": 120},
{"vehicle": {"length": 5.0, "width": 2.0, "maxPosAcc": 2.0, "maxNegAcc": 4.5, "usualPosAcc": 2.0, "usualNegAcc": 4.5, "minGap": 2.5, "maxSpeed": 11.111, "headwayTime": 2}, "route": ["road_2_17_3", "road_2_16_3", "road_2_15_3", "road_2_14_3", "road_2_13_3", "road_2_12_3", "road_2_11_3", "road_2_10_3", "road_2_9_3", "road_2_8_3", "road_2_7_3", "road_2_6_2", "road_1_6_1", "road_1_7_2"], "interval": 1.0, "startTime": 120, "endTime": 120},
{"vehicle": {"length": 5.0, "width": 2.0, "maxPosAcc": 2.0, "maxNegAcc": 4.5, "usualPosAcc": 2.0, "usualNegAcc": 4.5, "minGap": 2.5, "maxSpeed": 11.111, "headwayTime": 2}, "route": ["road_0_11_0", "road_1_11_0", "road_2_11_3", "road_2_10_3", "road_2_9_0", "road_3_9_0"], "interval": 1.0, "startTime": 120, "endTime": 120},
{"vehicle": {"length": 5.0, "width": 2.0, "maxPosAcc": 2.0, "maxNegAcc": 4.5, "usualPosAcc": 2.0, "usualNegAcc": 4.5, "minGap": 2.5, "maxSpeed": 11.111, "headwayTime": 2}, "route": ["road_0_12_0", "road_1_12_1", "road_1_13_0", "road_2_13_3", "road_2_12_3", "road_2_11_3", "road_2_10_3", "road_2_9_3", "road_2_8_3", "road_2_7_3", "road_2_6_2", "road_1_6_2"], "interval": 1.0, "startTime": 120, "endTime": 120},
{"vehicle": {"length": 5.0, "width": 2.0, "maxPosAcc": 2.0, "maxNegAcc": 4.5, "usualPosAcc": 2.0, "usualNegAcc": 4.5, "minGap": 2.5, "maxSpeed": 11.111, "headwayTime": 2}, "route": ["road_0_5_0", "road_1_5_0", "road_2_5_3", "road_2_4_3", "road_2_3_3", "road_2_2_3", "road_2_1_2", "road_1_1_3"], "interval": 1.0, "startTime": 120, "endTime": 120},
{"vehicle": {"length": 5.0, "width": 2.0, "maxPosAcc": 2.0, "maxNegAcc": 4.5, "usualPosAcc": 2.0, "usualNegAcc": 4.5, "minGap": 2.5, "maxSpeed": 11.111, "headwayTime": 2}, "route": ["road_2_17_3", "road_2_16_3", "road_2_15_0", "road_3_15_0"], "interval": 1.0, "startTime": 121, "endTime": 121},
{"vehicle": {"length": 5.0, "width": 2.0, "maxPosAcc": 2.0, "maxNegAcc": 4.5, "usualPosAcc": 2.0, "usualNegAcc": 4.5, "minGap": 2.5, "maxSpeed": 11.111, "headwayTime": 2}, "route": ["road_4_8_2", "road_3_8_1", "road_3_9_1", "road_3_10_1", "road_3_11_1", "road_3_12_0"], "interval": 1.0, "startTime": 127, "endTime": 127},
{"vehicle": {"length": 5.0, "width": 2.0, "maxPosAcc": 2.0, "maxNegAcc": 4.5, "usualPosAcc": 2.0, "usualNegAcc": 4.5, "minGap": 2.5, "maxSpeed": 11.111, "headwayTime": 2}, "route": ["road_4_12_2", "road_3_12_2", "road_2_12_2", "road_1_12_1", "road_1_13_2"], "interval": 1.0, "startTime": 127, "endTime": 127},
{"vehicle": {"length": 5.0, "width": 2.0, "maxPosAcc": 2.0, "maxNegAcc": 4.5, "usualPosAcc": 2.0, "usualNegAcc": 4.5, "minGap": 2.5, "maxSpeed": 11.111, "headwayTime": 2}, "route": ["road_1_17_3", "road_1_16_0", "road_2_16_1"], "interval": 1.0, "startTime": 127, "endTime": 127},
{"vehicle": {"length": 5.0, "width": 2.0, "maxPosAcc": 2.0, "maxNegAcc": 4.5, "usualPosAcc": 2.0, "usualNegAcc": 4.5, "minGap": 2.5, "maxSpeed": 11.111, "headwayTime": 2}, "route": ["road_4_7_2", "road_3_7_1", "road_3_8_2", "road_2_8_3", "road_2_7_3", "road_2_6_3", "road_2_5_3", "road_2_4_3", "road_2_3_3", "road_2_2_3", "road_2_1_0", "road_3_1_3"], "interval": 1.0, "startTime": 130, "endTime": 130},
{"vehicle": {"length": 5.0, "width": 2.0, "maxPosAcc": 2.0, "maxNegAcc": 4.5, "usualPosAcc": 2.0, "usualNegAcc": 4.5, "minGap": 2.5, "maxSpeed": 11.111, "headwayTime": 2}, "route": ["road_1_0_1", "road_1_1_1", "road_1_2_1", "road_1_3_0", "road_2_3_0", "road_3_3_1", "road_3_4_1", "road_3_5_1", "road_3_6_1", "road_3_7_1", "road_3_8_1", "road_3_9_1", "road_3_10_1", "road_3_11_1", "road_3_12_0"], "interval": 1.0, "startTime": 130, "endTime": 130},
{"vehicle": {"length": 5.0, "width": 2.0, "maxPosAcc": 2.0, "maxNegAcc": 4.5, "usualPosAcc": 2.0, "usualNegAcc": 4.5, "minGap": 2.5, "maxSpeed": 11.111, "headwayTime": 2}, "route": ["road_4_6_2", "road_3_6_1", "road_3_7_1", "road_3_8_1", "road_3_9_1", "road_3_10_1", "road_3_11_1", "road_3_12_1", "road_3_13_1", "road_3_14_1", "road_3_15_1", "road_3_16_1"], "interval": 1.0, "startTime": 132, "endTime": 132},
{"vehicle": {"length": 5.0, "width": 2.0, "maxPosAcc": 2.0, "maxNegAcc": 4.5, "usualPosAcc": 2.0, "usualNegAcc": 4.5, "minGap": 2.5, "maxSpeed": 11.111, "headwayTime": 2}, "route": ["road_3_0_1", "road_3_1_1", "road_3_2_1", "road_3_3_1", "road_3_4_1", "road_3_5_1", "road_3_6_1", "road_3_7_1", "road_3_8_1", "road_3_9_1", "road_3_10_1", "road_3_11_1", "road_3_12_0"], "interval": 1.0, "startTime": 134, "endTime": 134},
{"vehicle": {"length": 5.0, "width": 2.0, "maxPosAcc": 2.0, "maxNegAcc": 4.5, "usualPosAcc": 2.0, "usualNegAcc": 4.5, "minGap": 2.5, "maxSpeed": 11.111, "headwayTime": 2}, "route": ["road_0_2_0", "road_1_2_1", "road_1_3_1", "road_1_4_1", "road_1_5_1", "road_1_6_1", "road_1_7_1", "road_1_8_1", "road_1_9_1", "road_1_10_1", "road_1_11_1", "road_1_12_1", "road_1_13_1", "road_1_14_2"], "interval": 1.0, "startTime": 136, "endTime": 136},
{"vehicle": {"length": 5.0, "width": 2.0, "maxPosAcc": 2.0, "maxNegAcc": 4.5, "usualPosAcc": 2.0, "usualNegAcc": 4.5, "minGap": 2.5, "maxSpeed": 11.111, "headwayTime": 2}, "route": ["road_3_17_3", "road_3_16_2", "road_2_16_3", "road_2_15_3", "road_2_14_3", "road_2_13_0", "road_3_13_1", "road_3_14_0"], "interval": 1.0, "startTime": 138, "endTime": 138},
{"vehicle": {"length": 5.0, "width": 2.0, "maxPosAcc": 2.0, "maxNegAcc": 4.5, "usualPosAcc": 2.0, "usualNegAcc": 4.5, "minGap": 2.5, "maxSpeed": 11.111, "headwayTime": 2}, "route": ["road_1_0_1", "road_1_1_0", "road_2_1_0", "road_3_1_3"], "interval": 1.0, "startTime": 141, "endTime": 141},
{"vehicle": {"length": 5.0, "width": 2.0, "maxPosAcc": 2.0, "maxNegAcc": 4.5, "usualPosAcc": 2.0, "usualNegAcc": 4.5, "minGap": 2.5, "maxSpeed": 11.111, "headwayTime": 2}, "route": ["road_0_13_0", "road_1_13_0", "road_2_13_3", "road_2_12_3", "road_2_11_3", "road_2_10_3", "road_2_9_3", "road_2_8_3", "road_2_7_0", "road_3_7_1", "road_3_8_0"], "interval": 1.0, "startTime": 143, "endTime": 143},
{"vehicle": {"length": 5.0, "width": 2.0, "maxPosAcc": 2.0, "maxNegAcc": 4.5, "usualPosAcc": 2.0, "usualNegAcc": 4.5, "minGap": 2.5, "maxSpeed": 11.111, "headwayTime": 2}, "route": ["road_4_5_2", "road_3_5_1", "road_3_6_2", "road_2_6_2", "road_1_6_2"], "interval": 1.0, "startTime": 145, "endTime": 145},
{"vehicle": {"length": 5.0, "width": 2.0, "maxPosAcc": 2.0, "maxNegAcc": 4.5, "usualPosAcc": 2.0, "usualNegAcc": 4.5, "minGap": 2.5, "maxSpeed": 11.111, "headwayTime": 2}, "route": ["road_4_5_2", "road_3_5_1", "road_3_6_1", "road_3_7_1", "road_3_8_1", "road_3_9_1", "road_3_10_1", "road_3_11_1", "road_3_12_1", "road_3_13_1", "road_3_14_1", "road_3_15_1", "road_3_16_2", "road_2_16_1"], "interval": 1.0, "startTime": 147, "endTime": 147},
{"vehicle": {"length": 5.0, "width": 2.0, "maxPosAcc": 2.0, "maxNegAcc": 4.5, "usualPosAcc": 2.0, "usualNegAcc": 4.5, "minGap": 2.5, "maxSpeed": 11.111, "headwayTime": 2}, "route": ["road_0_15_0", "road_1_15_0", "road_2_15_3", "road_2_14_3", "road_2_13_3", "road_2_12_3", "road_2_11_3", "road_2_10_3", "road_2_9_3", "road_2_8_3", "road_2_7_3", "road_2_6_3", "road_2_5_3", "road_2_4_3", "road_2_3_3", "road_2_2_3", "road_2_1_0", "road_3_1_1", "road_3_2_0"], "interval": 1.0, "startTime": 148, "endTime": 148},
{"vehicle": {"length": 5.0, "width": 2.0, "maxPosAcc": 2.0, "maxNegAcc": 4.5, "usualPosAcc": 2.0, "usualNegAcc": 4.5, "minGap": 2.5, "maxSpeed": 11.111, "headwayTime": 2}, "route": ["road_4_3_2", "road_3_3_1", "road_3_4_1", "road_3_5_1", "road_3_6_1", "road_3_7_1", "road_3_8_1", "road_3_9_1", "road_3_10_1", "road_3_11_1", "road_3_12_1", "road_3_13_1", "road_3_14_1", "road_3_15_1", "road_3_16_2", "road_2_16_1"], "interval": 1.0, "startTime": 148, "endTime": 148},
{"vehicle": {"length": 5.0, "width": 2.0, "maxPosAcc": 2.0, "maxNegAcc": 4.5, "usualPosAcc": 2.0, "usualNegAcc": 4.5, "minGap": 2.5, "maxSpeed": 11.111, "headwayTime": 2}, "route": ["road_4_14_2", "road_3_14_1", "road_3_15_1", "road_3_16_1"], "interval": 1.0, "startTime": 149, "endTime": 149},
{"vehicle": {"length": 5.0, "width": 2.0, "maxPosAcc": 2.0, "maxNegAcc": 4.5, "usualPosAcc": 2.0, "usualNegAcc": 4.5, "minGap": 2.5, "maxSpeed": 11.111, "headwayTime": 2}, "route": ["road_2_17_3", "road_2_16_3", "road_2_15_3", "road_2_14_3", "road_2_13_0", "road_3_13_0"], "interval": 1.0, "startTime": 149, "endTime": 149},
{"vehicle": {"length": 5.0, "width": 2.0, "maxPosAcc": 2.0, "maxNegAcc": 4.5, "usualPosAcc": 2.0, "usualNegAcc": 4.5, "minGap": 2.5, "maxSpeed": 11.111, "headwayTime": 2}, "route": ["road_2_17_3", "road_2_16_3", "road_2_15_3", "road_2_14_3", "road_2_13_3", "road_2_12_3", "road_2_11_3", "road_2_10_3", "road_2_9_3", "road_2_8_3", "road_2_7_3", "road_2_6_3", "road_2_5_3", "road_2_4_3", "road_2_3_3", "road_2_2_3", "road_2_1_2", "road_1_1_3"], "interval": 1.0, "startTime": 151, "endTime": 151},
{"vehicle": {"length": 5.0, "width": 2.0, "maxPosAcc": 2.0, "maxNegAcc": 4.5, "usualPosAcc": 2.0, "usualNegAcc": 4.5, "minGap": 2.5, "maxSpeed": 11.111, "headwayTime": 2}, "route": ["road_2_0_1", "road_2_1_0", "road_3_1_1", "road_3_2_1", "road_3_3_1", "road_3_4_1", "road_3_5_1", "road_3_6_1", "road_3_7_1", "road_3_8_1", "road_3_9_1", "road_3_10_1", "road_3_11_1", "road_3_12_1", "road_3_13_1", "road_3_14_1", "road_3_15_1", "road_3_16_2", "road_2_16_1"], "interval": 1.0, "startTime": 156, "endTime": 156},
{"vehicle": {"length": 5.0, "width": 2.0, "maxPosAcc": 2.0, "maxNegAcc": 4.5, "usualPosAcc": 2.0, "usualNegAcc": 4.5, "minGap": 2.5, "maxSpeed": 11.111, "headwayTime": 2}, "route": ["road_4_15_2", "road_3_15_1", "road_3_16_2", "road_2_16_3", "road_2_15_3", "road_2_14_3", "road_2_13_3", "road_2_12_3", "road_2_11_3", "road_2_10_3", "road_2_9_3", "road_2_8_3", "road_2_7_3", "road_2_6_3", "road_2_5_3", "road_2_4_3", "road_2_3_0", "road_3_3_1", "road_3_4_0"], "interval": 1.0, "startTime": 158, "endTime": 158},
{"vehicle": {"length": 5.0, "width": 2.0, "maxPosAcc": 2.0, "maxNegAcc": 4.5, "usualPosAcc": 2.0, "usualNegAcc": 4.5, "minGap": 2.5, "maxSpeed": 11.111, "headwayTime": 2}, "route": ["road_2_17_3", "road_2_16_3", "road_2_15_3", "road_2_14_3", "road_2_13_3", "road_2_12_3", "road_2_11_3", "road_2_10_3", "road_2_9_3", "road_2_8_2", "road_1_8_1", "road_1_9_2"], "interval": 1.0, "startTime": 158, "endTime": 158},
{"vehicle": {"length": 5.0, "width": 2.0, "maxPosAcc": 2.0, "maxNegAcc": 4.5, "usualPosAcc": 2.0, "usualNegAcc": 4.5, "minGap": 2.5, "maxSpeed": 11.111, "headwayTime": 2}, "route": ["road_4_15_2", "road_3_15_1", "road_3_16_2", "road_2_16_3", "road_2_15_3", "road_2_14_3", "road_2_13_3", "road_2_12_3", "road_2_11_3", "road_2_10_3", "road_2_9_0", "road_3_9_1", "road_3_10_0"], "interval": 1.0, "startTime": 159, "endTime": 159},
{"vehicle": {"length": 5.0, "width": 2.0, "maxPosAcc": 2.0, "maxNegAcc": 4.5, "usualPosAcc": 2.0, "usualNegAcc": 4.5, "minGap": 2.5, "maxSpeed": 11.111, "headwayTime": 2}, "route": ["road_1_17_3", "road_1_16_0", "road_2_16_1"], "interval": 1.0, "startTime": 160, "endTime": 160},
{"vehicle": {"length": 5.0, "width": 2.0, "maxPosAcc": 2.0, "maxNegAcc": 4.5, "usualPosAcc": 2.0, "usualNegAcc": 4.5, "minGap": 2.5, "maxSpeed": 11.111, "headwayTime": 2}, "route": ["road_3_17_3", "road_3_16_2", "road_2_16_2", "road_1_16_1"], "interval": 1.0, "startTime": 161, "endTime": 161},
{"vehicle": {"length": 5.0, "width": 2.0, "maxPosAcc": 2.0, "maxNegAcc": 4.5, "usualPosAcc": 2.0, "usualNegAcc": 4.5, "minGap": 2.5, "maxSpeed": 11.111, "headwayTime": 2}, "route": ["road_4_6_2", "road_3_6_2", "road_2_6_2", "road_1_6_1", "road_1_7_2"], "interval": 1.0, "startTime": 167, "endTime": 167},
{"vehicle": {"length": 5.0, "width": 2.0, "maxPosAcc": 2.0, "maxNegAcc": 4.5, "usualPosAcc": 2.0, "usualNegAcc": 4.5, "minGap": 2.5, "maxSpeed": 11.111, "headwayTime": 2}, "route": ["road_4_14_2", "road_3_14_2", "road_2_14_3", "road_2_13_3", "road_2_12_3", "road_2_11_3", "road_2_10_3", "road_2_9_3", "road_2_8_3", "road_2_7_3", "road_2_6_3", "road_2_5_0", "road_3_5_0"], "interval": 1.0, "startTime": 168, "endTime": 168},
{"vehicle": {"length": 5.0, "width": 2.0, "maxPosAcc": 2.0, "maxNegAcc": 4.5, "usualPosAcc": 2.0, "usualNegAcc": 4.5, "minGap": 2.5, "maxSpeed": 11.111, "headwayTime": 2}, "route": ["road_4_4_2", "road_3_4_1", "road_3_5_1", "road_3_6_1", "road_3_7_1", "road_3_8_1", "road_3_9_1", "road_3_10_1", "road_3_11_1", "road_3_12_0"], "interval": 1.0, "startTime": 169, "endTime": 169},
{"vehicle": {"length": 5.0, "width": 2.0, "maxPosAcc": 2.0, "maxNegAcc": 4.5, "usualPosAcc": 2.0, "usualNegAcc": 4.5, "minGap": 2.5, "maxSpeed": 11.111, "headwayTime": 2}, "route": ["road_3_17_3", "road_3_16_2", "road_2_16_3", "road_2_15_3", "road_2_14_3", "road_2_13_3", "road_2_12_3", "road_2_11_3", "road_2_10_3", "road_2_9_3", "road_2_8_3", "road_2_7_3", "road_2_6_3", "road_2_5_3", "road_2_4_3", "road_2_3_3", "road_2_2_3", "road_2_1_0", "road_3_1_3"], "interval": 1.0, "startTime": 169, "endTime": 169},
{"vehicle": {"length": 5.0, "width": 2.0, "maxPosAcc": 2.0, "maxNegAcc": 4.5, "usualPosAcc": 2.0, "usualNegAcc": 4.5, "minGap": 2.5, "maxSpeed": 11.111, "headwayTime": 2}, "route": ["road_2_0_1", "road_2_1_2", "road_1_1_1", "road_1_2_1", "road_1_3_2"], "interval": 1.0, "startTime": 169, "endTime": 169},
{"vehicle": {"length": 5.0, "width": 2.0, "maxPosAcc": 2.0, "maxNegAcc": 4.5, "usualPosAcc": 2.0, "usualNegAcc": 4.5, "minGap": 2.5, "maxSpeed": 11.111, "headwayTime": 2}, "route": ["road_4_13_2", "road_3_13_1", "road_3_14_2", "road_2_14_3", "road_2_13_3", "road_2_12_3", "road_2_11_3", "road_2_10_3", "road_2_9_3", "road_2_8_3", "road_2_7_3", "road_2_6_3", "road_2_5_3", "road_2_4_3", "road_2_3_3", "road_2_2_3", "road_2_1_0", "road_3_1_3"], "interval": 1.0, "startTime": 170, "endTime": 170},
{"vehicle": {"length": 5.0, "width": 2.0, "maxPosAcc": 2.0, "maxNegAcc": 4.5, "usualPosAcc": 2.0, "usualNegAcc": 4.5, "minGap": 2.5, "maxSpeed": 11.111, "headwayTime": 2}, "route": ["road_0_4_0", "road_1_4_1", "road_1_5_0", "road_2_5_0", "road_3_5_1", "road_3_6_1", "road_3_7_1", "road_3_8_1", "road_3_9_1", "road_3_10_0"], "interval": 1.0, "startTime": 172, "endTime": 172},
{"vehicle": {"length": 5.0, "width": 2.0, "maxPosAcc": 2.0, "maxNegAcc": 4.5, "usualPosAcc": 2.0, "usualNegAcc": 4.5, "minGap": 2.5, "maxSpeed": 11.111, "headwayTime": 2}, "route": ["road_3_0_1", "road_3_1_1", "road_3_2_0"], "interval": 1.0, "startTime": 172, "endTime": 172},
{"vehicle": {"length": 5.0, "width": 2.0, "maxPosAcc": 2.0, "maxNegAcc": 4.5, "usualPosAcc": 2.0, "usualNegAcc": 4.5, "minGap": 2.5, "maxSpeed": 11.111, "headwayTime": 2}, "route": ["road_2_0_1", "road_2_1_2", "road_1_1_1", "road_1_2_1", "road_1_3_1", "road_1_4_1", "road_1_5_1", "road_1_6_1", "road_1_7_2"], "interval": 1.0, "startTime": 173, "endTime": 173},
{"vehicle": {"length": 5.0, "width": 2.0, "maxPosAcc": 2.0, "maxNegAcc": 4.5, "usualPosAcc": 2.0, "usualNegAcc": 4.5, "minGap": 2.5, "maxSpeed": 11.111, "headwayTime": 2}, "route": ["road_4_5_2", "road_3_5_1", "road_3_6_1", "road_3_7_1", "road_3_8_1", "road_3_9_1", "road_3_10_1", "road_3_11_0"], "interval": 1.0, "startTime": 174, "endTime": 174},
{"vehicle": {"length": 5.0, "width": 2.0, "maxPosAcc": 2.0, "maxNegAcc": 4.5, "usualPosAcc": 2.0, "usualNegAcc": 4.5, "minGap": 2.5, "maxSpeed": 11.111, "headwayTime": 2}, "route": ["road_4_13_2", "road_3_13_1", "road_3_14_2", "road_2_14_3", "road_2_13_3", "road_2_12_3", "road_2_11_3", "road_2_10_3", "road_2_9_3", "road_2_8_2", "road_1_8_1", "road_1_9_2"], "interval": 1.0, "startTime": 174, "endTime": 174},
{"vehicle": {"length": 5.0, "width": 2.0, "maxPosAcc": 2.0, "maxNegAcc": 4.5, "usualPosAcc": 2.0, "usualNegAcc": 4.5, "minGap": 2.5, "maxSpeed": 11.111, "headwayTime": 2}, "route": ["road_0_9_0", "road_1_9_0", "road_2_9_0", "road_3_9_1", "road_3_10_0"], "interval": 1.0, "startTime": 175, "endTime": 175},
{"vehicle": {"length": 5.0, "width": 2.0, "maxPosAcc": 2.0, "maxNegAcc": 4.5, "usualPosAcc": 2.0, "usualNegAcc": 4.5, "minGap": 2.5, "maxSpeed": 11.111, "headwayTime": 2}, "route": ["road_4_7_2", "road_3_7_1", "road_3_8_2", "road_2_8_3", "road_2_7_3", "road_2_6_3", "road_2_5_3", "road_2_4_3", "road_2_3_3", "road_2_2_3", "road_2_1_0", "road_3_1_3"], "interval": 1.0, "startTime": 178, "endTime": 178},
{"vehicle": {"length": 5.0, "width": 2.0, "maxPosAcc": 2.0, "maxNegAcc": 4.5, "usualPosAcc": 2.0, "usualNegAcc": 4.5, "minGap": 2.5, "maxSpeed": 11.111, "headwayTime": 2}, "route": ["road_3_17_3", "road_3_16_2", "road_2_16_2", "road_1_16_1"], "interval": 1.0, "startTime": 178, "endTime": 178},
{"vehicle": {"length": 5.0, "width": 2.0, "maxPosAcc": 2.0, "maxNegAcc": 4.5, "usualPosAcc": 2.0, "usualNegAcc": 4.5, "minGap": 2.5, "maxSpeed": 11.111, "headwayTime": 2}, "route": ["road_0_15_0", "road_1_15_0", "road_2_15_3", "road_2_14_3", "road_2_13_3", "road_2_12_3", "road_2_11_3", "road_2_10_3", "road_2_9_3", "road_2_8_3", "road_2_7_3", "road_2_6_3", "road_2_5_3", "road_2_4_3", "road_2_3_0", "road_3_3_0"], "interval": 1.0, "startTime": 180, "endTime": 180},
{"vehicle": {"length": 5.0, "width": 2.0, "maxPosAcc": 2.0, "maxNegAcc": 4.5, "usualPosAcc": 2.0, "usualNegAcc": 4.5, "minGap": 2.5, "maxSpeed": 11.111, "headwayTime": 2}, "route": ["road_4_8_2", "road_3_8_2", "road_2_8_3", "road_2_7_3", "road_2_6_3", "road_2_5_3", "road_2_4_2", "road_1_4_2"], "interval": 1.0, "startTime": 180, "endTime": 180},
{"vehicle": {"length": 5.0, "width": 2.0, "maxPosAcc": 2.0, "maxNegAcc": 4.5, "usualPosAcc": 2.0, "usualNegAcc": 4.5, "minGap": 2.5, "maxSpeed": 11.111, "headwayTime": 2}, "route": ["road_3_0_1", "road_3_1_1", "road_3_2_1", "road_3_3_1", "road_3_4_1", "road_3_5_1", "road_3_6_1", "road_3_7_1", "road_3_8_1", "road_3_9_1", "road_3_10_0"], "interval": 1.0, "startTime": 180, "endTime": 180},
{"vehicle": {"length": 5.0, "width": 2.0, "maxPosAcc": 2.0, "maxNegAcc": 4.5, "usualPosAcc": 2.0, "usualNegAcc": 4.5, "minGap": 2.5, "maxSpeed": 11.111, "headwayTime": 2}, "route": ["road_4_6_2", "road_3_6_2", "road_2_6_3", "road_2_5_3", "road_2_4_3", "road_2_3_0", "road_3_3_1", "road_3_4_0"], "interval": 1.0, "startTime": 180, "endTime": 180},
{"vehicle": {"length": 5.0, "width": 2.0, "maxPosAcc": 2.0, "maxNegAcc": 4.5, "usualPosAcc": 2.0, "usualNegAcc": 4.5, "minGap": 2.5, "maxSpeed": 11.111, "headwayTime": 2}, "route": ["road_4_9_2", "road_3_9_1", "road_3_10_1", "road_3_11_1", "road_3_12_1", "road_3_13_1", "road_3_14_1", "road_3_15_1", "road_3_16_2", "road_2_16_1"], "interval": 1.0, "startTime": 180, "endTime": 180},
{"vehicle": {"length": 5.0, "width": 2.0, "maxPosAcc": 2.0, "maxNegAcc": 4.5, "usualPosAcc": 2.0, "usualNegAcc": 4.5, "minGap": 2.5, "maxSpeed": 11.111, "headwayTime": 2}, "route": ["road_4_11_2", "road_3_11_1", "road_3_12_0"], "interval": 1.0, "startTime": 180, "endTime": 180},
{"vehicle": {"length": 5.0, "width": 2.0, "maxPosAcc": 2.0, "maxNegAcc": 4.5, "usualPosAcc": 2.0, "usualNegAcc": 4.5, "minGap": 2.5, "maxSpeed": 11.111, "headwayTime": 2}, "route": ["road_4_13_2", "road_3_13_1", "road_3_14_2", "road_2_14_3", "road_2_13_3", "road_2_12_3", "road_2_11_3", "road_2_10_3", "road_2_9_3", "road_2_8_3", "road_2_7_3", "road_2_6_3", "road_2_5_3", "road_2_4_2", "road_1_4_1", "road_1_5_2"], "interval": 1.0, "startTime": 180, "endTime": 180},
{"vehicle": {"length": 5.0, "width": 2.0, "maxPosAcc": 2.0, "maxNegAcc": 4.5, "usualPosAcc": 2.0, "usualNegAcc": 4.5, "minGap": 2.5, "maxSpeed": 11.111, "headwayTime": 2}, "route": ["road_4_14_2", "road_3_14_2", "road_2_14_3", "road_2_13_3", "road_2_12_3", "road_2_11_3", "road_2_10_3", "road_2_9_3", "road_2_8_3", "road_2_7_3", "road_2_6_3", "road_2_5_0", "road_3_5_1", "road_3_6_0"], "interval": 1.0, "startTime": 180, "endTime": 180},
{"vehicle": {"length": 5.0, "width": 2.0, "maxPosAcc": 2.0, "maxNegAcc": 4.5, "usualPosAcc": 2.0, "usualNegAcc": 4.5, "minGap": 2.5, "maxSpeed": 11.111, "headwayTime": 2}, "route": ["road_3_17_3", "road_3_16_2", "road_2_16_3", "road_2_15_3", "road_2_14_3", "road_2_13_3", "road_2_12_3", "road_2_11_3", "road_2_10_3", "road_2_9_3", "road_2_8_3", "road_2_7_3", "road_2_6_3", "road_2_5_3", "road_2_4_3", "road_2_3_3", "road_2_2_3", "road_2_1_0", "road_3_1_3"], "interval": 1.0, "startTime": 180, "endTime": 180},
{"vehicle": {"length": 5.0, "width": 2.0, "maxPosAcc": 2.0, "maxNegAcc": 4.5, "usualPosAcc": 2.0, "usualNegAcc": 4.5, "minGap": 2.5, "maxSpeed": 11.111, "headwayTime": 2}, "route": ["road_2_0_1", "road_2_1_2", "road_1_1_1", "road_1_2_2"], "interval": 1.0, "startTime": 180, "endTime": 180},
{"vehicle": {"length": 5.0, "width": 2.0, "maxPosAcc": 2.0, "maxNegAcc": 4.5, "usualPosAcc": 2.0, "usualNegAcc": 4.5, "minGap": 2.5, "maxSpeed": 11.111, "headwayTime": 2}, "route": ["road_1_0_1", "road_1_1_0", "road_2_1_0", "road_3_1_3"], "interval": 1.0, "startTime": 180, "endTime": 180},
{"vehicle": {"length": 5.0, "width": 2.0, "maxPosAcc": 2.0, "maxNegAcc": 4.5, "usualPosAcc": 2.0, "usualNegAcc": 4.5, "minGap": 2.5, "maxSpeed": 11.111, "headwayTime": 2}, "route": ["road_0_9_0", "road_1_9_1", "road_1_10_1", "road_1_11_1", "road_1_12_1", "road_1_13_1", "road_1_14_1", "road_1_15_0", "road_2_15_0", "road_3_15_0"], "interval": 1.0, "startTime": 180, "endTime": 180},
{"vehicle": {"length": 5.0, "width": 2.0, "maxPosAcc": 2.0, "maxNegAcc": 4.5, "usualPosAcc": 2.0, "usualNegAcc": 4.5, "minGap": 2.5, "maxSpeed": 11.111, "headwayTime": 2}, "route": ["road_0_14_0", "road_1_14_1", "road_1_15_0", "road_2_15_3", "road_2_14_3", "road_2_13_3", "road_2_12_3", "road_2_11_0", "road_3_11_0"], "interval": 1.0, "startTime": 180, "endTime": 180},
{"vehicle": {"length": 5.0, "width": 2.0, "maxPosAcc": 2.0, "maxNegAcc": 4.5, "usualPosAcc": 2.0, "usualNegAcc": 4.5, "minGap": 2.5, "maxSpeed": 11.111, "headwayTime": 2}, "route": ["road_2_17_3", "road_2_16_3", "road_2_15_3", "road_2_14_3", "road_2_13_3", "road_2_12_3", "road_2_11_3", "road_2_10_3", "road_2_9_3", "road_2_8_2", "road_1_8_2"], "interval": 1.0, "startTime": 180, "endTime": 180},
{"vehicle": {"length": 5.0, "width": 2.0, "maxPosAcc": 2.0, "maxNegAcc": 4.5, "usualPosAcc": 2.0, "usualNegAcc": 4.5, "minGap": 2.5, "maxSpeed": 11.111, "headwayTime": 2}, "route": ["road_0_12_0", "road_1_12_1", "road_1_13_2"], "interval": 1.0, "startTime": 180, "endTime": 180},
{"vehicle": {"length": 5.0, "width": 2.0, "maxPosAcc": 2.0, "maxNegAcc": 4.5, "usualPosAcc": 2.0, "usualNegAcc": 4.5, "minGap": 2.5, "maxSpeed": 11.111, "headwayTime": 2}, "route": ["road_0_6_0", "road_1_6_1", "road_1_7_1", "road_1_8_1", "road_1_9_1", "road_1_10_1", "road_1_11_2"], "interval": 1.0, "startTime": 180, "endTime": 180},
{"vehicle": {"length": 5.0, "width": 2.0, "maxPosAcc": 2.0, "maxNegAcc": 4.5, "usualPosAcc": 2.0, "usualNegAcc": 4.5, "minGap": 2.5, "maxSpeed": 11.111, "headwayTime": 2}, "route": ["road_0_10_0", "road_1_10_1", "road_1_11_0", "road_2_11_3", "road_2_10_3", "road_2_9_3", "road_2_8_3", "road_2_7_3", "road_2_6_2", "road_1_6_1", "road_1_7_2"], "interval": 1.0, "startTime": 180, "endTime": 180},
{"vehicle": {"length": 5.0, "width": 2.0, "maxPosAcc": 2.0, "maxNegAcc": 4.5, "usualPosAcc": 2.0, "usualNegAcc": 4.5, "minGap": 2.5, "maxSpeed": 11.111, "headwayTime": 2}, "route": ["road_0_2_0", "road_1_2_1", "road_1_3_0", "road_2_3_3", "road_2_2_3", "road_2_1_3"], "interval": 1.0, "startTime": 180, "endTime": 180},
{"vehicle": {"length": 5.0, "width": 2.0, "maxPosAcc": 2.0, "maxNegAcc": 4.5, "usualPosAcc": 2.0, "usualNegAcc": 4.5, "minGap": 2.5, "maxSpeed": 11.111, "headwayTime": 2}, "route": ["road_4_2_2", "road_3_2_1", "road_3_3_1", "road_3_4_1", "road_3_5_1", "road_3_6_1", "road_3_7_1", "road_3_8_1", "road_3_9_1", "road_3_10_1", "road_3_11_1", "road_3_12_1", "road_3_13_0"], "interval": 1.0, "startTime": 180, "endTime": 180},
{"vehicle": {"length": 5.0, "width": 2.0, "maxPosAcc": 2.0, "maxNegAcc": 4.5, "usualPosAcc": 2.0, "usualNegAcc": 4.5, "minGap": 2.5, "maxSpeed": 11.111, "headwayTime": 2}, "route": ["road_0_12_0", "road_1_12_1", "road_1_13_0", "road_2_13_3", "road_2_12_3", "road_2_11_3", "road_2_10_3", "road_2_9_3", "road_2_8_3", "road_2_7_3", "road_2_6_3", "road_2_5_3", "road_2_4_2", "road_1_4_2"], "interval": 1.0, "startTime": 182, "endTime": 182},
{"vehicle": {"length": 5.0, "width": 2.0, "maxPosAcc": 2.0, "maxNegAcc": 4.5, "usualPosAcc": 2.0, "usualNegAcc": 4.5, "minGap": 2.5, "maxSpeed": 11.111, "headwayTime": 2}, "route": ["road_4_13_2", "road_3_13_1", "road_3_14_2", "road_2_14_3", "road_2_13_3", "road_2_12_3", "road_2_11_3", "road_2_10_3", "road_2_9_3", "road_2_8_3", "road_2_7_3", "road_2_6_3", "road_2_5_3", "road_2_4_3", "road_2_3_0", "road_3_3_0"], "interval": 1.0, "startTime": 186, "endTime": 186},
{"vehicle": {"length": 5.0, "width": 2.0, "maxPosAcc": 2.0, "maxNegAcc": 4.5, "usualPosAcc": 2.0, "usualNegAcc": 4.5, "minGap": 2.5, "maxSpeed": 11.111, "headwayTime": 2}, "route": ["road_3_0_1", "road_3_1_2", "road_2_1_3"], "interval": 1.0, "startTime": 191, "endTime": 191},
{"vehicle": {"length": 5.0, "width": 2.0, "maxPosAcc": 2.0, "maxNegAcc": 4.5, "usualPosAcc": 2.0, "usualNegAcc": 4.5, "minGap": 2.5, "maxSpeed": 11.111, "headwayTime": 2}, "route": ["road_4_6_2", "road_3_6_2", "road_2_6_3", "road_2_5_3", "road_2_4_3", "road_2_3_3", "road_2_2_3", "road_2_1_3"], "interval": 1.0, "startTime": 191, "endTime": 191},
{"vehicle": {"length": 5.0, "width": 2.0, "maxPosAcc": 2.0, "maxNegAcc": 4.5, "usualPosAcc": 2.0, "usualNegAcc": 4.5, "minGap": 2.5, "maxSpeed": 11.111, "headwayTime": 2}, "route": ["road_4_7_2", "road_3_7_1", "road_3_8_0"], "interval": 1.0, "startTime": 192, "endTime": 192},
{"vehicle": {"length": 5.0, "width": 2.0, "maxPosAcc": 2.0, "maxNegAcc": 4.5, "usualPosAcc": 2.0, "usualNegAcc": 4.5, "minGap": 2.5, "maxSpeed": 11.111, "headwayTime": 2}, "route": ["road_0_5_0", "road_1_5_0", "road_2_5_3", "road_2_4_3", "road_2_3_3", "road_2_2_2", "road_1_2_1", "road_1_3_2"], "interval": 1.0, "startTime": 194, "endTime": 194},
{"vehicle": {"length": 5.0, "width": 2.0, "maxPosAcc": 2.0, "maxNegAcc": 4.5, "usualPosAcc": 2.0, "usualNegAcc": 4.5, "minGap": 2.5, "maxSpeed": 11.111, "headwayTime": 2}, "route": ["road_3_0_1", "road_3_1_1", "road_3_2_1", "road_3_3_1", "road_3_4_0"], "interval": 1.0, "startTime": 195, "endTime": 195},
{"vehicle": {"length": 5.0, "width": 2.0, "maxPosAcc": 2.0, "maxNegAcc": 4.5, "usualPosAcc": 2.0, "usualNegAcc": 4.5, "minGap": 2.5, "maxSpeed": 11.111, "headwayTime": 2}, "route": ["road_2_17_3", "road_2_16_3", "road_2_15_3", "road_2_14_3", "road_2_13_3", "road_2_12_2", "road_1_12_2"], "interval": 1.0, "startTime": 199, "endTime": 199},
{"vehicle": {"length": 5.0, "width": 2.0, "maxPosAcc": 2.0, "maxNegAcc": 4.5, "usualPosAcc": 2.0, "usualNegAcc": 4.5, "minGap": 2.5, "maxSpeed": 11.111, "headwayTime": 2}, "route": ["road_0_11_0", "road_1_11_0", "road_2_11_3", "road_2_10_3", "road_2_9_3", "road_2_8_3", "road_2_7_3", "road_2_6_3", "road_2_5_3", "road_2_4_3", "road_2_3_3", "road_2_2_3", "road_2_1_3"], "interval": 1.0, "startTime": 201, "endTime": 201},
{"vehicle": {"length": 5.0, "width": 2.0, "maxPosAcc": 2.0, "maxNegAcc": 4.5, "usualPosAcc": 2.0, "usualNegAcc": 4.5, "minGap": 2.5, "maxSpeed": 11.111, "headwayTime": 2}, "route": ["road_0_6_0", "road_1_6_1", "road_1_7_0", "road_2_7_3", "road_2_6_3", "road_2_5_3", "road_2_4_3", "road_2_3_3", "road_2_2_2", "road_1_2_1", "road_1_3_2"], "interval": 1.0, "startTime": 203, "endTime": 203},
{"vehicle": {"length": 5.0, "width": 2.0, "maxPosAcc": 2.0, "maxNegAcc": 4.5, "usualPosAcc": 2.0, "usualNegAcc": 4.5, "minGap": 2.5, "maxSpeed": 11.111, "headwayTime": 2}, "route": ["road_4_15_2", "road_3_15_1", "road_3_16_2", "road_2_16_3", "road_2_15_3", "road_2_14_3", "road_2_13_3", "road_2_12_3", "road_2_11_3", "road_2_10_3", "road_2_9_3", "road_2_8_3", "road_2_7_3", "road_2_6_3", "road_2_5_0", "road_3_5_0"], "interval": 1.0, "startTime": 211, "endTime": 211},
{"vehicle": {"length": 5.0, "width": 2.0, "maxPosAcc": 2.0, "maxNegAcc": 4.5, "usualPosAcc": 2.0, "usualNegAcc": 4.5, "minGap": 2.5, "maxSpeed": 11.111, "headwayTime": 2}, "route": ["road_4_3_2", "road_3_3_1", "road_3_4_1", "road_3_5_1", "road_3_6_1", "road_3_7_1", "road_3_8_1", "road_3_9_1", "road_3_10_1", "road_3_11_1", "road_3_12_1", "road_3_13_1", "road_3_14_0"], "interval": 1.0, "startTime": 214, "endTime": 214},
{"vehicle": {"length": 5.0, "width": 2.0, "maxPosAcc": 2.0, "maxNegAcc": 4.5, "usualPosAcc": 2.0, "usualNegAcc": 4.5, "minGap": 2.5, "maxSpeed": 11.111, "headwayTime": 2}, "route": ["road_3_0_1", "road_3_1_1", "road_3_2_1", "road_3_3_1", "road_3_4_0"], "interval": 1.0, "startTime": 216, "endTime": 216},
{"vehicle": {"length": 5.0, "width": 2.0, "maxPosAcc": 2.0, "maxNegAcc": 4.5, "usualPosAcc": 2.0, "usualNegAcc": 4.5, "minGap": 2.5, "maxSpeed": 11.111, "headwayTime": 2}, "route": ["road_4_10_2", "road_3_10_2", "road_2_10_3", "road_2_9_3", "road_2_8_3", "road_2_7_3", "road_2_6_3", "road_2_5_3", "road_2_4_3", "road_2_3_0", "road_3_3_1", "road_3_4_0"], "interval": 1.0, "startTime": 216, "endTime": 216},
{"vehicle": {"length": 5.0, "width": 2.0, "maxPosAcc": 2.0, "maxNegAcc": 4.5, "usualPosAcc": 2.0, "usualNegAcc": 4.5, "minGap": 2.5, "maxSpeed": 11.111, "headwayTime": 2}, "route": ["road_1_17_3", "road_1_16_0", "road_2_16_3", "road_2_15_3", "road_2_14_3", "road_2_13_3", "road_2_12_3", "road_2_11_0", "road_3_11_1", "road_3_12_0"], "interval": 1.0, "startTime": 216, "endTime": 216},
{"vehicle": {"length": 5.0, "width": 2.0, "maxPosAcc": 2.0, "maxNegAcc": 4.5, "usualPosAcc": 2.0, "usualNegAcc": 4.5, "minGap": 2.5, "maxSpeed": 11.111, "headwayTime": 2}, "route": ["road_3_17_3", "road_3_16_2", "road_2_16_3", "road_2_15_3", "road_2_14_3", "road_2_13_3", "road_2_12_3", "road_2_11_3", "road_2_10_3", "road_2_9_3", "road_2_8_3", "road_2_7_3", "road_2_6_3", "road_2_5_0", "road_3_5_0"], "interval": 1.0, "startTime": 220, "endTime": 220},
{"vehicle": {"length": 5.0, "width": 2.0, "maxPosAcc": 2.0, "maxNegAcc": 4.5, "usualPosAcc": 2.0, "usualNegAcc": 4.5, "minGap": 2.5, "maxSpeed": 11.111, "headwayTime": 2}, "route": ["road_4_4_2", "road_3_4_1", "road_3_5_1", "road_3_6_1", "road_3_7_1", "road_3_8_1", "road_3_9_1", "road_3_10_1", "road_3_11_1", "road_3_12_1", "road_3_13_1", "road_3_14_1", "road_3_15_1", "road_3_16_1"], "interval": 1.0, "startTime": 224, "endTime": 224},
{"vehicle": {"length": 5.0, "width": 2.0, "maxPosAcc": 2.0, "maxNegAcc": 4.5, "usualPosAcc": 2.0, "usualNegAcc": 4.5, "minGap": 2.5, "maxSpeed": 11.111, "headwayTime": 2}, "route": ["road_0_11_0", "road_1_11_0", "road_2_11_0", "road_3_11_1", "road_3_12_0"], "interval": 1.0, "startTime": 234, "endTime": 234},
{"vehicle": {"length": 5.0, "width": 2.0, "maxPosAcc": 2.0, "maxNegAcc": 4.5, "usualPosAcc": 2.0, "usualNegAcc": 4.5, "minGap": 2.5, "maxSpeed": 11.111, "headwayTime": 2}, "route": ["road_4_6_2", "road_3_6_1", "road_3_7_1", "road_3_8_1", "road_3_9_1", "road_3_10_1", "road_3_11_1", "road_3_12_1", "road_3_13_1", "road_3_14_1", "road_3_15_1", "road_3_16_1"], "interval": 1.0, "startTime": 235, "endTime": 235},
{"vehicle": {"length": 5.0, "width": 2.0, "maxPosAcc": 2.0, "maxNegAcc": 4.5, "usualPosAcc": 2.0, "usualNegAcc": 4.5, "minGap": 2.5, "maxSpeed": 11.111, "headwayTime": 2}, "route": ["road_2_0_1", "road_2_1_0", "road_3_1_1", "road_3_2_1", "road_3_3_1", "road_3_4_1", "road_3_5_1", "road_3_6_1", "road_3_7_1", "road_3_8_0"], "interval": 1.0, "startTime": 235, "endTime": 235},
{"vehicle": {"length": 5.0, "width": 2.0, "maxPosAcc": 2.0, "maxNegAcc": 4.5, "usualPosAcc": 2.0, "usualNegAcc": 4.5, "minGap": 2.5, "maxSpeed": 11.111, "headwayTime": 2}, "route": ["road_4_3_2", "road_3_3_1", "road_3_4_1", "road_3_5_1", "road_3_6_1", "road_3_7_1", "road_3_8_1", "road_3_9_1", "road_3_10_1", "road_3_11_1", "road_3_12_1", "road_3_13_0"], "interval": 1.0, "startTime": 239, "endTime": 239},
{"vehicle": {"length": 5.0, "width": 2.0, "maxPosAcc": 2.0, "maxNegAcc": 4.5, "usualPosAcc": 2.0, "usualNegAcc": 4.5, "minGap": 2.5, "maxSpeed": 11.111, "headwayTime": 2}, "route": ["road_4_8_2", "road_3_8_2", "road_2_8_3", "road_2_7_0", "road_3_7_0"], "interval": 1.0, "startTime": 240, "endTime": 240},
{"vehicle": {"length": 5.0, "width": 2.0, "maxPosAcc": 2.0, "maxNegAcc": 4.5, "usualPosAcc": 2.0, "usualNegAcc": 4.5, "minGap": 2.5, "maxSpeed": 11.111, "headwayTime": 2}, "route": ["road_4_4_2", "road_3_4_2", "road_2_4_3", "road_2_3_3", "road_2_2_3", "road_2_1_0", "road_3_1_3"], "interval": 1.0, "startTime": 240, "endTime": 240},
{"vehicle": {"length": 5.0, "width": 2.0, "maxPosAcc": 2.0, "maxNegAcc": 4.5, "usualPosAcc": 2.0, "usualNegAcc": 4.5, "minGap": 2.5, "maxSpeed": 11.111, "headwayTime": 2}, "route": ["road_0_4_0", "road_1_4_1", "road_1_5_1", "road_1_6_1", "road_1_7_1", "road_1_8_1", "road_1_9_1", "road_1_10_1", "road_1_11_2"], "interval": 1.0, "startTime": 240, "endTime": 240},
{"vehicle": {"length": 5.0, "width": 2.0, "maxPosAcc": 2.0, "maxNegAcc": 4.5, "usualPosAcc": 2.0, "usualNegAcc": 4.5, "minGap": 2.5, "maxSpeed": 11.111, "headwayTime": 2}, "route": ["road_3_0_1", "road_3_1_2", "road_2_1_2", "road_1_1_3"], "interval": 1.0, "startTime": 240, "endTime": 240},
{"vehicle": {"length": 5.0, "width": 2.0, "maxPosAcc": 2.0, "maxNegAcc": 4.5, "usualPosAcc": 2.0, "usualNegAcc": 4.5, "minGap": 2.5, "maxSpeed": 11.111, "headwayTime": 2}, "route": ["road_4_3_2", "road_3_3_1", "road_3_4_1", "road_3_5_1", "road_3_6_0"], "interval": 1.0, "startTime": 240, "endTime": 240},
{"vehicle": {"length": 5.0, "width": 2.0, "maxPosAcc": 2.0, "maxNegAcc": 4.5, "usualPosAcc": 2.0, "usualNegAcc": 4.5, "minGap": 2.5, "maxSpeed": 11.111, "headwayTime": 2}, "route": ["road_4_6_2", "road_3_6_1", "road_3_7_1", "road_3_8_1", "road_3_9_1", "road_3_10_1", "road_3_11_1", "road_3_12_1", "road_3_13_1", "road_3_14_1", "road_3_15_0"], "interval": 1.0, "startTime": 240, "endTime": 240},
{"vehicle": {"length": 5.0, "width": 2.0, "maxPosAcc": 2.0, "maxNegAcc": 4.5, "usualPosAcc": 2.0, "usualNegAcc": 4.5, "minGap": 2.5, "maxSpeed": 11.111, "headwayTime": 2}, "route": ["road_4_9_2", "road_3_9_1", "road_3_10_2", "road_2_10_3", "road_2_9_3", "road_2_8_3", "road_2_7_3", "road_2_6_3", "road_2_5_3", "road_2_4_3", "road_2_3_0", "road_3_3_1", "road_3_4_0"], "interval": 1.0, "startTime": 240, "endTime": 240},
{"vehicle": {"length": 5.0, "width": 2.0, "maxPosAcc": 2.0, "maxNegAcc": 4.5, "usualPosAcc": 2.0, "usualNegAcc": 4.5, "minGap": 2.5, "maxSpeed": 11.111, "headwayTime": 2}, "route": ["road_4_11_2", "road_3_11_1", "road_3_12_1", "road_3_13_1", "road_3_14_1", "road_3_15_1", "road_3_16_1"], "interval": 1.0, "startTime": 240, "endTime": 240},
{"vehicle": {"length": 5.0, "width": 2.0, "maxPosAcc": 2.0, "maxNegAcc": 4.5, "usualPosAcc": 2.0, "usualNegAcc": 4.5, "minGap": 2.5, "maxSpeed": 11.111, "headwayTime": 2}, "route": ["road_4_13_2", "road_3_13_1", "road_3_14_2", "road_2_14_3", "road_2_13_3", "road_2_12_3", "road_2_11_0", "road_3_11_1", "road_3_12_0"], "interval": 1.0, "startTime": 240, "endTime": 240},
{"vehicle": {"length": 5.0, "width": 2.0, "maxPosAcc": 2.0, "maxNegAcc": 4.5, "usualPosAcc": 2.0, "usualNegAcc": 4.5, "minGap": 2.5, "maxSpeed": 11.111, "headwayTime": 2}, "route": ["road_4_14_2", "road_3_14_2", "road_2_14_3", "road_2_13_3", "road_2_12_3", "road_2_11_3", "road_2_10_3", "road_2_9_3", "road_2_8_3", "road_2_7_3", "road_2_6_3", "road_2_5_3", "road_2_4_3", "road_2_3_0", "road_3_3_1", "road_3_4_0"], "interval": 1.0, "startTime": 240, "endTime": 240},
{"vehicle": {"length": 5.0, "width": 2.0, "maxPosAcc": 2.0, "maxNegAcc": 4.5, "usualPosAcc": 2.0, "usualNegAcc": 4.5, "minGap": 2.5, "maxSpeed": 11.111, "headwayTime": 2}, "route": ["road_3_17_3", "road_3_16_2", "road_2_16_3", "road_2_15_3", "road_2_14_3", "road_2_13_3", "road_2_12_3", "road_2_11_3", "road_2_10_3", "road_2_9_3", "road_2_8_3", "road_2_7_3", "road_2_6_3", "road_2_5_3", "road_2_4_3", "road_2_3_3", "road_2_2_3", "road_2_1_0", "road_3_1_3"], "interval": 1.0, "startTime": 240, "endTime": 240},
{"vehicle": {"length": 5.0, "width": 2.0, "maxPosAcc": 2.0, "maxNegAcc": 4.5, "usualPosAcc": 2.0, "usualNegAcc": 4.5, "minGap": 2.5, "maxSpeed": 11.111, "headwayTime": 2}, "route": ["road_2_0_1", "road_2_1_2", "road_1_1_1", "road_1_2_1", "road_1_3_1", "road_1_4_1", "road_1_5_1", "road_1_6_1", "road_1_7_1", "road_1_8_1", "road_1_9_1", "road_1_10_1", "road_1_11_1", "road_1_12_2"], "interval": 1.0, "startTime": 240, "endTime": 240},
{"vehicle": {"length": 5.0, "width": 2.0, "maxPosAcc": 2.0, "maxNegAcc": 4.5, "usualPosAcc": 2.0, "usualNegAcc": 4.5, "minGap": 2.5, "maxSpeed": 11.111, "headwayTime": 2}, "route": ["road_1_0_1", "road_1_1_0", "road_2_1_3"], "interval": 1.0, "startTime": 240, "endTime": 240},
{"vehicle": {"length": 5.0, "width": 2.0, "maxPosAcc": 2.0, "maxNegAcc": 4.5, "usualPosAcc": 2.0, "usualNegAcc": 4.5, "minGap": 2.5, "maxSpeed": 11.111, "headwayTime": 2}, "route": ["road_0_9_0", "road_1_9_0", "road_2_9_3", "road_2_8_3", "road_2_7_3", "road_2_6_3", "road_2_5_3", "road_2_4_3", "road_2_3_3", "road_2_2_3", "road_2_1_0", "road_3_1_1", "road_3_2_0"], "interval": 1.0, "startTime": 240, "endTime": 240},
{"vehicle": {"length": 5.0, "width": 2.0, "maxPosAcc": 2.0, "maxNegAcc": 4.5, "usualPosAcc": 2.0, "usualNegAcc": 4.5, "minGap": 2.5, "maxSpeed": 11.111, "headwayTime": 2}, "route": ["road_0_14_0", "road_1_14_1", "road_1_15_1", "road_1_16_1"], "interval": 1.0, "startTime": 240, "endTime": 240},
{"vehicle": {"length": 5.0, "width": 2.0, "maxPosAcc": 2.0, "maxNegAcc": 4.5, "usualPosAcc": 2.0, "usualNegAcc": 4.5, "minGap": 2.5, "maxSpeed": 11.111, "headwayTime": 2}, "route": ["road_2_17_3", "road_2_16_3", "road_2_15_3", "road_2_14_3", "road_2_13_3", "road_2_12_3", "road_2_11_0", "road_3_11_1", "road_3_12_0"], "interval": 1.0, "startTime": 240, "endTime": 240},
{"vehicle": {"length": 5.0, "width": 2.0, "maxPosAcc": 2.0, "maxNegAcc": 4.5, "usualPosAcc": 2.0, "usualNegAcc": 4.5, "minGap": 2.5, "maxSpeed": 11.111, "headwayTime": 2}, "route": ["road_0_6_0", "road_1_6_1", "road_1_7_1", "road_1_8_1", "road_1_9_1", "road_1_10_1", "road_1_11_1", "road_1_12_2"], "interval": 1.0, "startTime": 240, "endTime": 240},
{"vehicle": {"length": 5.0, "width": 2.0, "maxPosAcc": 2.0, "maxNegAcc": 4.5, "usualPosAcc": 2.0, "usualNegAcc": 4.5, "minGap": 2.5, "maxSpeed": 11.111, "headwayTime": 2}, "route": ["road_0_10_0", "road_1_10_1", "road_1_11_0", "road_2_11_3", "road_2_10_3", "road_2_9_3", "road_2_8_3", "road_2_7_3", "road_2_6_2", "road_1_6_1", "road_1_7_2"], "interval": 1.0, "startTime": 240, "endTime": 240},
{"vehicle": {"length": 5.0, "width": 2.0, "maxPosAcc": 2.0, "maxNegAcc": 4.5, "usualPosAcc": 2.0, "usualNegAcc": 4.5, "minGap": 2.5, "maxSpeed": 11.111, "headwayTime": 2}, "route": ["road_1_17_3", "road_1_16_0", "road_2_16_3", "road_2_15_3", "road_2_14_3", "road_2_13_3", "road_2_12_3", "road_2_11_3", "road_2_10_3", "road_2_9_3", "road_2_8_3", "road_2_7_3", "road_2_6_3", "road_2_5_3", "road_2_4_3", "road_2_3_3", "road_2_2_3", "road_2_1_3"], "interval": 1.0, "startTime": 240, "endTime": 240},
{"vehicle": {"length": 5.0, "width": 2.0, "maxPosAcc": 2.0, "maxNegAcc": 4.5, "usualPosAcc": 2.0, "usualNegAcc": 4.5, "minGap": 2.5, "maxSpeed": 11.111, "headwayTime": 2}, "route": ["road_4_2_2", "road_3_2_2", "road_2_2_2", "road_1_2_1", "road_1_3_2"], "interval": 1.0, "startTime": 240, "endTime": 240},
{"vehicle": {"length": 5.0, "width": 2.0, "maxPosAcc": 2.0, "maxNegAcc": 4.5, "usualPosAcc": 2.0, "usualNegAcc": 4.5, "minGap": 2.5, "maxSpeed": 11.111, "headwayTime": 2}, "route": ["road_4_11_2", "road_3_11_1", "road_3_12_2", "road_2_12_3", "road_2_11_3", "road_2_10_3", "road_2_9_3", "road_2_8_3", "road_2_7_0", "road_3_7_0"], "interval": 1.0, "startTime": 243, "endTime": 243},
{"vehicle": {"length": 5.0, "width": 2.0, "maxPosAcc": 2.0, "maxNegAcc": 4.5, "usualPosAcc": 2.0, "usualNegAcc": 4.5, "minGap": 2.5, "maxSpeed": 11.111, "headwayTime": 2}, "route": ["road_1_0_1", "road_1_1_0", "road_2_1_0", "road_3_1_3"], "interval": 1.0, "startTime": 246, "endTime": 246},
{"vehicle": {"length": 5.0, "width": 2.0, "maxPosAcc": 2.0, "maxNegAcc": 4.5, "usualPosAcc": 2.0, "usualNegAcc": 4.5, "minGap": 2.5, "maxSpeed": 11.111, "headwayTime": 2}, "route": ["road_0_7_0", "road_1_7_0", "road_2_7_0", "road_3_7_1", "road_3_8_1", "road_3_9_1", "road_3_10_0"], "interval": 1.0, "startTime": 250, "endTime": 250},
{"vehicle": {"length": 5.0, "width": 2.0, "maxPosAcc": 2.0, "maxNegAcc": 4.5, "usualPosAcc": 2.0, "usualNegAcc": 4.5, "minGap": 2.5, "maxSpeed": 11.111, "headwayTime": 2}, "route": ["road_4_2_2", "road_3_2_1", "road_3_3_1", "road_3_4_1", "road_3_5_1", "road_3_6_1", "road_3_7_0"], "interval": 1.0, "startTime": 250, "endTime": 250},
{"vehicle": {"length": 5.0, "width": 2.0, "maxPosAcc": 2.0, "maxNegAcc": 4.5, "usualPosAcc": 2.0, "usualNegAcc": 4.5, "minGap": 2.5, "maxSpeed": 11.111, "headwayTime": 2}, "route": ["road_4_14_2", "road_3_14_2", "road_2_14_3", "road_2_13_0", "road_3_13_0"], "interval": 1.0, "startTime": 255, "endTime": 255},
{"vehicle": {"length": 5.0, "width": 2.0, "maxPosAcc": 2.0, "maxNegAcc": 4.5, "usualPosAcc": 2.0, "usualNegAcc": 4.5, "minGap": 2.5, "maxSpeed": 11.111, "headwayTime": 2}, "route": ["road_4_9_2", "road_3_9_1", "road_3_10_2", "road_2_10_3", "road_2_9_3", "road_2_8_3", "road_2_7_3", "road_2_6_3", "road_2_5_3", "road_2_4_3", "road_2_3_0", "road_3_3_1", "road_3_4_0"], "interval": 1.0, "startTime": 256, "endTime": 256},
{"vehicle": {"length": 5.0, "width": 2.0, "maxPosAcc": 2.0, "maxNegAcc": 4.5, "usualPosAcc": 2.0, "usualNegAcc": 4.5, "minGap": 2.5, "maxSpeed": 11.111, "headwayTime": 2}, "route": ["road_3_0_1", "road_3_1_1", "road_3_2_1", "road_3_3_0"], "interval": 1.0, "startTime": 257, "endTime": 257},
{"vehicle": {"length": 5.0, "width": 2.0, "maxPosAcc": 2.0, "maxNegAcc": 4.5, "usualPosAcc": 2.0, "usualNegAcc": 4.5, "minGap": 2.5, "maxSpeed": 11.111, "headwayTime": 2}, "route": ["road_2_0_1", "road_2_1_0", "road_3_1_1", "road_3_2_1", "road_3_3_1", "road_3_4_1", "road_3_5_1", "road_3_6_1", "road_3_7_1", "road_3_8_1", "road_3_9_1", "road_3_10_1", "road_3_11_1", "road_3_12_0"], "interval": 1.0, "startTime": 258, "endTime": 258},
{"vehicle": {"length": 5.0, "width": 2.0, "maxPosAcc": 2.0, "maxNegAcc": 4.5, "usualPosAcc": 2.0, "usualNegAcc": 4.5, "minGap": 2.5, "maxSpeed": 11.111, "headwayTime": 2}, "route": ["road_4_4_2", "road_3_4_2", "road_2_4_3", "road_2_3_3", "road_2_2_3", "road_2_1_0", "road_3_1_3"], "interval": 1.0, "startTime": 260, "endTime": 260},
{"vehicle": {"length": 5.0, "width": 2.0, "maxPosAcc": 2.0, "maxNegAcc": 4.5, "usualPosAcc": 2.0, "usualNegAcc": 4.5, "minGap": 2.5, "maxSpeed": 11.111, "headwayTime": 2}, "route": ["road_4_13_2", "road_3_13_1", "road_3_14_2", "road_2_14_3", "road_2_13_3", "road_2_12_3", "road_2_11_3", "road_2_10_3", "road_2_9_3", "road_2_8_3", "road_2_7_3", "road_2_6_3", "road_2_5_3", "road_2_4_3", "road_2_3_3", "road_2_2_3", "road_2_1_0", "road_3_1_1", "road_3_2_0"], "interval": 1.0, "startTime": 260, "endTime": 260},
{"vehicle": {"length": 5.0, "width": 2.0, "maxPosAcc": 2.0, "maxNegAcc": 4.5, "usualPosAcc": 2.0, "usualNegAcc": 4.5, "minGap": 2.5, "maxSpeed": 11.111, "headwayTime": 2}, "route": ["road_4_5_2", "road_3_5_1", "road_3_6_2", "road_2_6_3", "road_2_5_3", "road_2_4_3", "road_2_3_0", "road_3_3_1", "road_3_4_0"], "interval": 1.0, "startTime": 266, "endTime": 266},
{"vehicle": {"length": 5.0, "width": 2.0, "maxPosAcc": 2.0, "maxNegAcc": 4.5, "usualPosAcc": 2.0, "usualNegAcc": 4.5, "minGap": 2.5, "maxSpeed": 11.111, "headwayTime": 2}, "route": ["road_0_9_0", "road_1_9_0", "road_2_9_3", "road_2_8_3", "road_2_7_3", "road_2_6_3", "road_2_5_0", "road_3_5_1", "road_3_6_0"], "interval": 1.0, "startTime": 267, "endTime": 267},
{"vehicle": {"length": 5.0, "width": 2.0, "maxPosAcc": 2.0, "maxNegAcc": 4.5, "usualPosAcc": 2.0, "usualNegAcc": 4.5, "minGap": 2.5, "maxSpeed": 11.111, "headwayTime": 2}, "route": ["road_2_17_3", "road_2_16_3", "road_2_15_3", "road_2_14_3", "road_2_13_3", "road_2_12_3", "road_2_11_3", "road_2_10_3", "road_2_9_0", "road_3_9_1", "road_3_10_0"], "interval": 1.0, "startTime": 268, "endTime": 268},
{"vehicle": {"length": 5.0, "width": 2.0, "maxPosAcc": 2.0, "maxNegAcc": 4.5, "usualPosAcc": 2.0, "usualNegAcc": 4.5, "minGap": 2.5, "maxSpeed": 11.111, "headwayTime": 2}, "route": ["road_4_11_2", "road_3_11_1", "road_3_12_2", "road_2_12_3", "road_2_11_3", "road_2_10_3", "road_2_9_3", "road_2_8_3", "road_2_7_0", "road_3_7_1", "road_3_8_0"], "interval": 1.0, "startTime": 270, "endTime": 270},
{"vehicle": {"length": 5.0, "width": 2.0, "maxPosAcc": 2.0, "maxNegAcc": 4.5, "usualPosAcc": 2.0, "usualNegAcc": 4.5, "minGap": 2.5, "maxSpeed": 11.111, "headwayTime": 2}, "route": ["road_1_17_3", "road_1_16_0", "road_2_16_3", "road_2_15_3", "road_2_14_3", "road_2_13_3", "road_2_12_3", "road_2_11_3", "road_2_10_3", "road_2_9_3", "road_2_8_3", "road_2_7_0", "road_3_7_1", "road_3_8_0"], "interval": 1.0, "startTime": 270, "endTime": 270},
{"vehicle": {"length": 5.0, "width": 2.0, "maxPosAcc": 2.0, "maxNegAcc": 4.5, "usualPosAcc": 2.0, "usualNegAcc": 4.5, "minGap": 2.5, "maxSpeed": 11.111, "headwayTime": 2}, "route": ["road_2_0_1", "road_2_1_0", "road_3_1_1", "road_3_2_1", "road_3_3_1", "road_3_4_1", "road_3_5_1", "road_3_6_1", "road_3_7_1", "road_3_8_0"], "interval": 1.0, "startTime": 275, "endTime": 275},
{"vehicle": {"length": 5.0, "width": 2.0, "maxPosAcc": 2.0, "maxNegAcc": 4.5, "usualPosAcc": 2.0, "usualNegAcc": 4.5, "minGap": 2.5, "maxSpeed": 11.111, "headwayTime": 2}, "route": ["road_2_17_3", "road_2_16_3", "road_2_15_3", "road_2_14_3", "road_2_13_3", "road_2_12_3", "road_2_11_3", "road_2_10_3", "road_2_9_0", "road_3_9_1", "road_3_10_0"], "interval": 1.0, "startTime": 276, "endTime": 276},
{"vehicle": {"length": 5.0, "width": 2.0, "maxPosAcc": 2.0, "maxNegAcc": 4.5, "usualPosAcc": 2.0, "usualNegAcc": 4.5, "minGap": 2.5, "maxSpeed": 11.111, "headwayTime": 2}, "route": ["road_3_17_3", "road_3_16_2", "road_2_16_3", "road_2_15_3", "road_2_14_3", "road_2_13_3", "road_2_12_3", "road_2_11_3", "road_2_10_3", "road_2_9_3", "road_2_8_3", "road_2_7_3", "road_2_6_3", "road_2_5_3", "road_2_4_3", "road_2_3_3", "road_2_2_3", "road_2_1_0", "road_3_1_3"], "interval": 1.0, "startTime": 277, "endTime": 277},
{"vehicle": {"length": 5.0, "width": 2.0, "maxPosAcc": 2.0, "maxNegAcc": 4.5, "usualPosAcc": 2.0, "usualNegAcc": 4.5, "minGap": 2.5, "maxSpeed": 11.111, "headwayTime": 2}, "route": ["road_4_9_2", "road_3_9_1", "road_3_10_1", "road_3_11_1", "road_3_12_1", "road_3_13_1", "road_3_14_2", "road_2_14_2", "road_1_14_1", "road_1_15_2"], "interval": 1.0, "startTime": 281, "endTime": 281},
{"vehicle": {"length": 5.0, "width": 2.0, "maxPosAcc": 2.0, "maxNegAcc": 4.5, "usualPosAcc": 2.0, "usualNegAcc": 4.5, "minGap": 2.5, "maxSpeed": 11.111, "headwayTime": 2}, "route": ["road_4_11_2", "road_3_11_1", "road_3_12_2", "road_2_12_3", "road_2_11_3", "road_2_10_3", "road_2_9_3", "road_2_8_3", "road_2_7_3", "road_2_6_3", "road_2_5_3", "road_2_4_3", "road_2_3_3", "road_2_2_3", "road_2_1_3"], "interval": 1.0, "startTime": 281, "endTime": 281},
{"vehicle": {"length": 5.0, "width": 2.0, "maxPosAcc": 2.0, "maxNegAcc": 4.5, "usualPosAcc": 2.0, "usualNegAcc": 4.5, "minGap": 2.5, "maxSpeed": 11.111, "headwayTime": 2}, "route": ["road_3_17_3", "road_3_16_2", "road_2_16_3", "road_2_15_3", "road_2_14_3", "road_2_13_3", "road_2_12_3", "road_2_11_3", "road_2_10_3", "road_2_9_3", "road_2_8_3", "road_2_7_3", "road_2_6_3", "road_2_5_3", "road_2_4_3", "road_2_3_3", "road_2_2_3", "road_2_1_0", "road_3_1_3"], "interval": 1.0, "startTime": 281, "endTime": 281},
{"vehicle": {"length": 5.0, "width": 2.0, "maxPosAcc": 2.0, "maxNegAcc": 4.5, "usualPosAcc": 2.0, "usualNegAcc": 4.5, "minGap": 2.5, "maxSpeed": 11.111, "headwayTime": 2}, "route": ["road_4_15_2", "road_3_15_1", "road_3_16_2", "road_2_16_3", "road_2_15_3", "road_2_14_3", "road_2_13_0", "road_3_13_1", "road_3_14_0"], "interval": 1.0, "startTime": 283, "endTime": 283},
{"vehicle": {"length": 5.0, "width": 2.0, "maxPosAcc": 2.0, "maxNegAcc": 4.5, "usualPosAcc": 2.0, "usualNegAcc": 4.5, "minGap": 2.5, "maxSpeed": 11.111, "headwayTime": 2}, "route": ["road_4_4_2", "road_3_4_2", "road_2_4_2", "road_1_4_1", "road_1_5_2"], "interval": 1.0, "startTime": 286, "endTime": 286},
{"vehicle": {"length": 5.0, "width": 2.0, "maxPosAcc": 2.0, "maxNegAcc": 4.5, "usualPosAcc": 2.0, "usualNegAcc": 4.5, "minGap": 2.5, "maxSpeed": 11.111, "headwayTime": 2}, "route": ["road_2_0_1", "road_2_1_2", "road_1_1_1", "road_1_2_1", "road_1_3_1", "road_1_4_1", "road_1_5_1", "road_1_6_1", "road_1_7_1", "road_1_8_1", "road_1_9_1", "road_1_10_1", "road_1_11_2"], "interval": 1.0, "startTime": 287, "endTime": 287},
{"vehicle": {"length": 5.0, "width": 2.0, "maxPosAcc": 2.0, "maxNegAcc": 4.5, "usualPosAcc": 2.0, "usualNegAcc": 4.5, "minGap": 2.5, "maxSpeed": 11.111, "headwayTime": 2}, "route": ["road_2_0_1", "road_2_1_0", "road_3_1_1", "road_3_2_1", "road_3_3_1", "road_3_4_1", "road_3_5_1", "road_3_6_1", "road_3_7_1", "road_3_8_1", "road_3_9_1", "road_3_10_1", "road_3_11_1", "road_3_12_0"], "interval": 1.0, "startTime": 289, "endTime": 289},
{"vehicle": {"length": 5.0, "width": 2.0, "maxPosAcc": 2.0, "maxNegAcc": 4.5, "usualPosAcc": 2.0, "usualNegAcc": 4.5, "minGap": 2.5, "maxSpeed": 11.111, "headwayTime": 2}, "route": ["road_0_14_0", "road_1_14_1", "road_1_15_0", "road_2_15_0", "road_3_15_0"], "interval": 1.0, "startTime": 289, "endTime": 289},
{"vehicle": {"length": 5.0, "width": 2.0, "maxPosAcc": 2.0, "maxNegAcc": 4.5, "usualPosAcc": 2.0, "usualNegAcc": 4.5, "minGap": 2.5, "maxSpeed": 11.111, "headwayTime": 2}, "route": ["road_3_0_1", "road_3_1_1", "road_3_2_1", "road_3_3_1", "road_3_4_2", "road_2_4_2", "road_1_4_1", "road_1_5_1", "road_1_6_2"], "interval": 1.0, "startTime": 292, "endTime": 292},
{"vehicle": {"length": 5.0, "width": 2.0, "maxPosAcc": 2.0, "maxNegAcc": 4.5, "usualPosAcc": 2.0, "usualNegAcc": 4.5, "minGap": 2.5, "maxSpeed": 11.111, "headwayTime": 2}, "route": ["road_4_13_2", "road_3_13_1", "road_3_14_2", "road_2_14_3", "road_2_13_3", "road_2_12_3", "road_2_11_3", "road_2_10_3", "road_2_9_3", "road_2_8_3", "road_2_7_0", "road_3_7_1", "road_3_8_0"], "interval": 1.0, "startTime": 292, "endTime": 292},
{"vehicle": {"length": 5.0, "width": 2.0, "maxPosAcc": 2.0, "maxNegAcc": 4.5, "usualPosAcc": 2.0, "usualNegAcc": 4.5, "minGap": 2.5, "maxSpeed": 11.111, "headwayTime": 2}, "route": ["road_3_0_1", "road_3_1_1", "road_3_2_1", "road_3_3_1", "road_3_4_0"], "interval": 1.0, "startTime": 295, "endTime": 295},
{"vehicle": {"length": 5.0, "width": 2.0, "maxPosAcc": 2.0, "maxNegAcc": 4.5, "usualPosAcc": 2.0, "usualNegAcc": 4.5, "minGap": 2.5, "maxSpeed": 11.111, "headwayTime": 2}, "route": ["road_2_17_3", "road_2_16_3", "road_2_15_0", "road_3_15_0"], "interval": 1.0, "startTime": 295, "endTime": 295},
{"vehicle": {"length": 5.0, "width": 2.0, "maxPosAcc": 2.0, "maxNegAcc": 4.5, "usualPosAcc": 2.0, "usualNegAcc": 4.5, "minGap": 2.5, "maxSpeed": 11.111, "headwayTime": 2}, "route": ["road_4_15_2", "road_3_15_1", "road_3_16_1"], "interval": 1.0, "startTime": 296, "endTime": 296},
{"vehicle": {"length": 5.0, "width": 2.0, "maxPosAcc": 2.0, "maxNegAcc": 4.5, "usualPosAcc": 2.0, "usualNegAcc": 4.5, "minGap": 2.5, "maxSpeed": 11.111, "headwayTime": 2}, "route": ["road_4_2_2", "road_3_2_1", "road_3_3_1", "road_3_4_2", "road_2_4_2", "road_1_4_1", "road_1_5_1", "road_1_6_1", "road_1_7_1", "road_1_8_1", "road_1_9_1", "road_1_10_1", "road_1_11_1", "road_1_12_1", "road_1_13_1", "road_1_14_2"], "interval": 1.0, "startTime": 296, "endTime": 296},
{"vehicle": {"length": 5.0, "width": 2.0, "maxPosAcc": 2.0, "maxNegAcc": 4.5, "usualPosAcc": 2.0, "usualNegAcc": 4.5, "minGap": 2.5, "maxSpeed": 11.111, "headwayTime": 2}, "route": ["road_4_5_2", "road_3_5_1", "road_3_6_1", "road_3_7_1", "road_3_8_1", "road_3_9_1", "road_3_10_1", "road_3_11_1", "road_3_12_1", "road_3_13_1", "road_3_14_2", "road_2_14_2", "road_1_14_1", "road_1_15_2"], "interval": 1.0, "startTime": 299, "endTime": 299},
{"vehicle": {"length": 5.0, "width": 2.0, "maxPosAcc": 2.0, "maxNegAcc": 4.5, "usualPosAcc": 2.0, "usualNegAcc": 4.5, "minGap": 2.5, "maxSpeed": 11.111, "headwayTime": 2}, "route": ["road_4_15_2", "road_3_15_1", "road_3_16_2", "road_2_16_3", "road_2_15_3", "road_2_14_3", "road_2_13_3", "road_2_12_3", "road_2_11_3", "road_2_10_3", "road_2_9_3", "road_2_8_3", "road_2_7_0", "road_3_7_1", "road_3_8_0"], "interval": 1.0, "startTime": 300, "endTime": 300},
{"vehicle": {"length": 5.0, "width": 2.0, "maxPosAcc": 2.0, "maxNegAcc": 4.5, "usualPosAcc": 2.0, "usualNegAcc": 4.5, "minGap": 2.5, "maxSpeed": 11.111, "headwayTime": 2}, "route": ["road_4_4_2", "road_3_4_2", "road_2_4_3", "road_2_3_3", "road_2_2_3", "road_2_1_3"], "interval": 1.0, "startTime": 300, "endTime": 300},
{"vehicle": {"length": 5.0, "width": 2.0, "maxPosAcc": 2.0, "maxNegAcc": 4.5, "usualPosAcc": 2.0, "usualNegAcc": 4.5, "minGap": 2.5, "maxSpeed": 11.111, "headwayTime": 2}, "route": ["road_3_0_1", "road_3_1_1", "road_3_2_1", "road_3_3_1", "road_3_4_1", "road_3_5_1", "road_3_6_1", "road_3_7_1", "road_3_8_0"], "interval": 1.0, "startTime": 300, "endTime": 300},
{"vehicle": {"length": 5.0, "width": 2.0, "maxPosAcc": 2.0, "maxNegAcc": 4.5, "usualPosAcc": 2.0, "usualNegAcc": 4.5, "minGap": 2.5, "maxSpeed": 11.111, "headwayTime": 2}, "route": ["road_4_3_2", "road_3_3_1", "road_3_4_1", "road_3_5_1", "road_3_6_1", "road_3_7_1", "road_3_8_1", "road_3_9_1", "road_3_10_1", "road_3_11_1", "road_3_12_1", "road_3_13_1", "road_3_14_2", "road_2_14_2", "road_1_14_1", "road_1_15_1", "road_1_16_1"], "interval": 1.0, "startTime": 300, "endTime": 300},
{"vehicle": {"length": 5.0, "width": 2.0, "maxPosAcc": 2.0, "maxNegAcc": 4.5, "usualPosAcc": 2.0, "usualNegAcc": 4.5, "minGap": 2.5, "maxSpeed": 11.111, "headwayTime": 2}, "route": ["road_4_6_2", "road_3_6_2", "road_2_6_2", "road_1_6_2"], "interval": 1.0, "startTime": 300, "endTime": 300},
{"vehicle": {"length": 5.0, "width": 2.0, "maxPosAcc": 2.0, "maxNegAcc": 4.5, "usualPosAcc": 2.0, "usualNegAcc": 4.5, "minGap": 2.5, "maxSpeed": 11.111, "headwayTime": 2}, "route": ["road_4_7_2", "road_3_7_1", "road_3_8_1", "road_3_9_1", "road_3_10_1", "road_3_11_1", "road_3_12_1", "road_3_13_1", "road_3_14_1", "road_3_15_0"], "interval": 1.0, "startTime": 300, "endTime": 300},
{"vehicle": {"length": 5.0, "width": 2.0, "maxPosAcc": 2.0, "maxNegAcc": 4.5, "usualPosAcc": 2.0, "usualNegAcc": 4.5, "minGap": 2.5, "maxSpeed": 11.111, "headwayTime": 2}, "route": ["road_4_9_2", "road_3_9_1", "road_3_10_2", "road_2_10_3", "road_2_9_3", "road_2_8_3", "road_2_7_3", "road_2_6_3", "road_2_5_0", "road_3_5_0"], "interval": 1.0, "startTime": 300, "endTime": 300},
{"vehicle": {"length": 5.0, "width": 2.0, "maxPosAcc": 2.0, "maxNegAcc": 4.5, "usualPosAcc": 2.0, "usualNegAcc": 4.5, "minGap": 2.5, "maxSpeed": 11.111, "headwayTime": 2}, "route": ["road_4_10_2", "road_3_10_2", "road_2_10_3", "road_2_9_3", "road_2_8_3", "road_2_7_3", "road_2_6_3", "road_2_5_3", "road_2_4_3", "road_2_3_3", "road_2_2_3", "road_2_1_0", "road_3_1_3"], "interval": 1.0, "startTime": 300, "endTime": 300},
{"vehicle": {"length": 5.0, "width": 2.0, "maxPosAcc": 2.0, "maxNegAcc": 4.5, "usualPosAcc": 2.0, "usualNegAcc": 4.5, "minGap": 2.5, "maxSpeed": 11.111, "headwayTime": 2}, "route": ["road_4_11_2", "road_3_11_1", "road_3_12_1", "road_3_13_1", "road_3_14_1", "road_3_15_1", "road_3_16_1"], "interval": 1.0, "startTime": 300, "endTime": 300},
{"vehicle": {"length": 5.0, "width": 2.0, "maxPosAcc": 2.0, "maxNegAcc": 4.5, "usualPosAcc": 2.0, "usualNegAcc": 4.5, "minGap": 2.5, "maxSpeed": 11.111, "headwayTime": 2}, "route": ["road_4_13_2", "road_3_13_1", "road_3_14_2", "road_2_14_3", "road_2_13_3", "road_2_12_3", "road_2_11_3", "road_2_10_3", "road_2_9_3", "road_2_8_3", "road_2_7_3", "road_2_6_3", "road_2_5_3", "road_2_4_3", "road_2_3_3", "road_2_2_3", "road_2_1_3"], "interval": 1.0, "startTime": 300, "endTime": 300},
{"vehicle": {"length": 5.0, "width": 2.0, "maxPosAcc": 2.0, "maxNegAcc": 4.5, "usualPosAcc": 2.0, "usualNegAcc": 4.5, "minGap": 2.5, "maxSpeed": 11.111, "headwayTime": 2}, "route": ["road_4_14_2", "road_3_14_2", "road_2_14_3", "road_2_13_3", "road_2_12_3", "road_2_11_3", "road_2_10_3", "road_2_9_3", "road_2_8_3", "road_2_7_3", "road_2_6_2", "road_1_6_2"], "interval": 1.0, "startTime": 300, "endTime": 300},
{"vehicle": {"length": 5.0, "width": 2.0, "maxPosAcc": 2.0, "maxNegAcc": 4.5, "usualPosAcc": 2.0, "usualNegAcc": 4.5, "minGap": 2.5, "maxSpeed": 11.111, "headwayTime": 2}, "route": ["road_3_17_3", "road_3_16_2", "road_2_16_3", "road_2_15_3", "road_2_14_3", "road_2_13_0", "road_3_13_0"], "interval": 1.0, "startTime": 300, "endTime": 300},
{"vehicle": {"length": 5.0, "width": 2.0, "maxPosAcc": 2.0, "maxNegAcc": 4.5, "usualPosAcc": 2.0, "usualNegAcc": 4.5, "minGap": 2.5, "maxSpeed": 11.111, "headwayTime": 2}, "route": ["road_1_0_1", "road_1_1_0", "road_2_1_3"], "interval": 1.0, "startTime": 300, "endTime": 300},
{"vehicle": {"length": 5.0, "width": 2.0, "maxPosAcc": 2.0, "maxNegAcc": 4.5, "usualPosAcc": 2.0, "usualNegAcc": 4.5, "minGap": 2.5, "maxSpeed": 11.111, "headwayTime": 2}, "route": ["road_0_14_0", "road_1_14_1", "road_1_15_0", "road_2_15_3", "road_2_14_3", "road_2_13_3", "road_2_12_3", "road_2_11_3", "road_2_10_3", "road_2_9_0", "road_3_9_0"], "interval": 1.0, "startTime": 300, "endTime": 300},
{"vehicle": {"length": 5.0, "width": 2.0, "maxPosAcc": 2.0, "maxNegAcc": 4.5, "usualPosAcc": 2.0, "usualNegAcc": 4.5, "minGap": 2.5, "maxSpeed": 11.111, "headwayTime": 2}, "route": ["road_0_12_0", "road_1_12_1", "road_1_13_0", "road_2_13_3", "road_2_12_3", "road_2_11_3", "road_2_10_3", "road_2_9_3", "road_2_8_3", "road_2_7_0", "road_3_7_1", "road_3_8_0"], "interval": 1.0, "startTime": 300, "endTime": 300},
{"vehicle": {"length": 5.0, "width": 2.0, "maxPosAcc": 2.0, "maxNegAcc": 4.5, "usualPosAcc": 2.0, "usualNegAcc": 4.5, "minGap": 2.5, "maxSpeed": 11.111, "headwayTime": 2}, "route": ["road_0_13_0", "road_1_13_0", "road_2_13_3", "road_2_12_3", "road_2_11_3", "road_2_10_3", "road_2_9_3", "road_2_8_2", "road_1_8_1", "road_1_9_2"], "interval": 1.0, "startTime": 300, "endTime": 300},
{"vehicle": {"length": 5.0, "width": 2.0, "maxPosAcc": 2.0, "maxNegAcc": 4.5, "usualPosAcc": 2.0, "usualNegAcc": 4.5, "minGap": 2.5, "maxSpeed": 11.111, "headwayTime": 2}, "route": ["road_0_10_0", "road_1_10_1", "road_1_11_0", "road_2_11_3", "road_2_10_3", "road_2_9_3", "road_2_8_3", "road_2_7_3", "road_2_6_2", "road_1_6_1", "road_1_7_2"], "interval": 1.0, "startTime": 300, "endTime": 300},
{"vehicle": {"length": 5.0, "width": 2.0, "maxPosAcc": 2.0, "maxNegAcc": 4.5, "usualPosAcc": 2.0, "usualNegAcc": 4.5, "minGap": 2.5, "maxSpeed": 11.111, "headwayTime": 2}, "route": ["road_4_2_2", "road_3_2_2", "road_2_2_3", "road_2_1_0", "road_3_1_3"], "interval": 1.0, "startTime": 300, "endTime": 300},
{"vehicle": {"length": 5.0, "width": 2.0, "maxPosAcc": 2.0, "maxNegAcc": 4.5, "usualPosAcc": 2.0, "usualNegAcc": 4.5, "minGap": 2.5, "maxSpeed": 11.111, "headwayTime": 2}, "route": ["road_1_0_1", "road_1_1_1", "road_1_2_1", "road_1_3_1", "road_1_4_1", "road_1_5_1", "road_1_6_1", "road_1_7_1", "road_1_8_1", "road_1_9_1", "road_1_10_1", "road_1_11_1", "road_1_12_1", "road_1_13_1", "road_1_14_1", "road_1_15_0", "road_2_15_0", "road_3_15_1", "road_3_16_1"], "interval": 1.0, "startTime": 301, "endTime": 301},
{"vehicle": {"length": 5.0, "width": 2.0, "maxPosAcc": 2.0, "maxNegAcc": 4.5, "usualPosAcc": 2.0, "usualNegAcc": 4.5, "minGap": 2.5, "maxSpeed": 11.111, "headwayTime": 2}, "route": ["road_3_17_3", "road_3_16_2", "road_2_16_3", "road_2_15_3", "road_2_14_3", "road_2_13_3", "road_2_12_3", "road_2_11_3", "road_2_10_3", "road_2_9_3", "road_2_8_3", "road_2_7_3", "road_2_6_3", "road_2_5_3", "road_2_4_3", "road_2_3_3", "road_2_2_3", "road_2_1_0", "road_3_1_3"], "interval": 1.0, "startTime": 302, "endTime": 302},
{"vehicle": {"length": 5.0, "width": 2.0, "maxPosAcc": 2.0, "maxNegAcc": 4.5, "usualPosAcc": 2.0, "usualNegAcc": 4.5, "minGap": 2.5, "maxSpeed": 11.111, "headwayTime": 2}, "route": ["road_3_17_3", "road_3_16_2", "road_2_16_3", "road_2_15_3", "road_2_14_3", "road_2_13_3", "road_2_12_3", "road_2_11_3", "road_2_10_3", "road_2_9_3", "road_2_8_3", "road_2_7_0", "road_3_7_1", "road_3_8_0"], "interval": 1.0, "startTime": 303, "endTime": 303},
{"vehicle": {"length": 5.0, "width": 2.0, "maxPosAcc": 2.0, "maxNegAcc": 4.5, "usualPosAcc": 2.0, "usualNegAcc": 4.5, "minGap": 2.5, "maxSpeed": 11.111, "headwayTime": 2}, "route": ["road_3_17_3", "road_3_16_2", "road_2_16_3", "road_2_15_3", "road_2_14_3", "road_2_13_3", "road_2_12_3", "road_2_11_3", "road_2_10_3", "road_2_9_0", "road_3_9_1", "road_3_10_0"], "interval": 1.0, "startTime": 307, "endTime": 307},
{"vehicle": {"length": 5.0, "width": 2.0, "maxPosAcc": 2.0, "maxNegAcc": 4.5, "usualPosAcc": 2.0, "usualNegAcc": 4.5, "minGap": 2.5, "maxSpeed": 11.111, "headwayTime": 2}, "route": ["road_1_17_3", "road_1_16_0", "road_2_16_1"], "interval": 1.0, "startTime": 307, "endTime": 307},
{"vehicle": {"length": 5.0, "width": 2.0, "maxPosAcc": 2.0, "maxNegAcc": 4.5, "usualPosAcc": 2.0, "usualNegAcc": 4.5, "minGap": 2.5, "maxSpeed": 11.111, "headwayTime": 2}, "route": ["road_4_6_2", "road_3_6_1", "road_3_7_1", "road_3_8_1", "road_3_9_0"], "interval": 1.0, "startTime": 309, "endTime": 309},
{"vehicle": {"length": 5.0, "width": 2.0, "maxPosAcc": 2.0, "maxNegAcc": 4.5, "usualPosAcc": 2.0, "usualNegAcc": 4.5, "minGap": 2.5, "maxSpeed": 11.111, "headwayTime": 2}, "route": ["road_1_17_3", "road_1_16_0", "road_2_16_0", "road_3_16_1"], "interval": 1.0, "startTime": 309, "endTime": 309},
{"vehicle": {"length": 5.0, "width": 2.0, "maxPosAcc": 2.0, "maxNegAcc": 4.5, "usualPosAcc": 2.0, "usualNegAcc": 4.5, "minGap": 2.5, "maxSpeed": 11.111, "headwayTime": 2}, "route": ["road_4_3_2", "road_3_3_1", "road_3_4_1", "road_3_5_1", "road_3_6_1", "road_3_7_1", "road_3_8_1", "road_3_9_1", "road_3_10_1", "road_3_11_1", "road_3_12_1", "road_3_13_0"], "interval": 1.0, "startTime": 311, "endTime": 311},
{"vehicle": {"length": 5.0, "width": 2.0, "maxPosAcc": 2.0, "maxNegAcc": 4.5, "usualPosAcc": 2.0, "usualNegAcc": 4.5, "minGap": 2.5, "maxSpeed": 11.111, "headwayTime": 2}, "route": ["road_3_0_1", "road_3_1_1", "road_3_2_1", "road_3_3_1", "road_3_4_1", "road_3_5_1", "road_3_6_1", "road_3_7_1", "road_3_8_1", "road_3_9_1", "road_3_10_1", "road_3_11_1", "road_3_12_1", "road_3_13_1", "road_3_14_1", "road_3_15_1", "road_3_16_1"], "interval": 1.0, "startTime": 312, "endTime": 312},
{"vehicle": {"length": 5.0, "width": 2.0, "maxPosAcc": 2.0, "maxNegAcc": 4.5, "usualPosAcc": 2.0, "usualNegAcc": 4.5, "minGap": 2.5, "maxSpeed": 11.111, "headwayTime": 2}, "route": ["road_3_0_1", "road_3_1_2", "road_2_1_2", "road_1_1_3"], "interval": 1.0, "startTime": 313, "endTime": 313},
{"vehicle": {"length": 5.0, "width": 2.0, "maxPosAcc": 2.0, "maxNegAcc": 4.5, "usualPosAcc": 2.0, "usualNegAcc": 4.5, "minGap": 2.5, "maxSpeed": 11.111, "headwayTime": 2}, "route": ["road_2_0_1", "road_2_1_0", "road_3_1_1", "road_3_2_1", "road_3_3_1", "road_3_4_1", "road_3_5_1", "road_3_6_1", "road_3_7_1", "road_3_8_1", "road_3_9_1", "road_3_10_1", "road_3_11_1", "road_3_12_1", "road_3_13_1", "road_3_14_0"], "interval": 1.0, "startTime": 313, "endTime": 313},
{"vehicle": {"length": 5.0, "width": 2.0, "maxPosAcc": 2.0, "maxNegAcc": 4.5, "usualPosAcc": 2.0, "usualNegAcc": 4.5, "minGap": 2.5, "maxSpeed": 11.111, "headwayTime": 2}, "route": ["road_4_4_2", "road_3_4_1", "road_3_5_1", "road_3_6_1", "road_3_7_1", "road_3_8_1", "road_3_9_1", "road_3_10_1", "road_3_11_1", "road_3_12_1", "road_3_13_1", "road_3_14_0"], "interval": 1.0, "startTime": 314, "endTime": 314},
{"vehicle": {"length": 5.0, "width": 2.0, "maxPosAcc": 2.0, "maxNegAcc": 4.5, "usualPosAcc": 2.0, "usualNegAcc": 4.5, "minGap": 2.5, "maxSpeed": 11.111, "headwayTime": 2}, "route": ["road_4_11_2", "road_3_11_1", "road_3_12_2", "road_2_12_3", "road_2_11_3", "road_2_10_3", "road_2_9_3", "road_2_8_3", "road_2_7_3", "road_2_6_3", "road_2_5_3", "road_2_4_3", "road_2_3_0", "road_3_3_1", "road_3_4_0"], "interval": 1.0, "startTime": 316, "endTime": 316},
{"vehicle": {"length": 5.0, "width": 2.0, "maxPosAcc": 2.0, "maxNegAcc": 4.5, "usualPosAcc": 2.0, "usualNegAcc": 4.5, "minGap": 2.5, "maxSpeed": 11.111, "headwayTime": 2}, "route": ["road_4_5_2", "road_3_5_1", "road_3_6_1", "road_3_7_1", "road_3_8_1", "road_3_9_1", "road_3_10_1", "road_3_11_1", "road_3_12_1", "road_3_13_1", "road_3_14_1", "road_3_15_0"], "interval": 1.0, "startTime": 318, "endTime": 318},
{"vehicle": {"length": 5.0, "width": 2.0, "maxPosAcc": 2.0, "maxNegAcc": 4.5, "usualPosAcc": 2.0, "usualNegAcc": 4.5, "minGap": 2.5, "maxSpeed": 11.111, "headwayTime": 2}, "route": ["road_4_6_2", "road_3_6_1", "road_3_7_1", "road_3_8_1", "road_3_9_1", "road_3_10_1", "road_3_11_1", "road_3_12_0"], "interval": 1.0, "startTime": 321, "endTime": 321},
{"vehicle": {"length": 5.0, "width": 2.0, "maxPosAcc": 2.0, "maxNegAcc": 4.5, "usualPosAcc": 2.0, "usualNegAcc": 4.5, "minGap": 2.5, "maxSpeed": 11.111, "headwayTime": 2}, "route": ["road_2_0_1", "road_2_1_0", "road_3_1_1", "road_3_2_1", "road_3_3_1", "road_3_4_1", "road_3_5_1", "road_3_6_1", "road_3_7_1", "road_3_8_1", "road_3_9_1", "road_3_10_1", "road_3_11_1", "road_3_12_1", "road_3_13_1", "road_3_14_1", "road_3_15_1", "road_3_16_1"], "interval": 1.0, "startTime": 321, "endTime": 321},
{"vehicle": {"length": 5.0, "width": 2.0, "maxPosAcc": 2.0, "maxNegAcc": 4.5, "usualPosAcc": 2.0, "usualNegAcc": 4.5, "minGap": 2.5, "maxSpeed": 11.111, "headwayTime": 2}, "route": ["road_0_6_0", "road_1_6_1", "road_1_7_0", "road_2_7_0", "road_3_7_1", "road_3_8_1", "road_3_9_0"], "interval": 1.0, "startTime": 324, "endTime": 324},
{"vehicle": {"length": 5.0, "width": 2.0, "maxPosAcc": 2.0, "maxNegAcc": 4.5, "usualPosAcc": 2.0, "usualNegAcc": 4.5, "minGap": 2.5, "maxSpeed": 11.111, "headwayTime": 2}, "route": ["road_0_5_0", "road_1_5_0", "road_2_5_3", "road_2_4_3", "road_2_3_3", "road_2_2_3", "road_2_1_3"], "interval": 1.0, "startTime": 328, "endTime": 328},
{"vehicle": {"length": 5.0, "width": 2.0, "maxPosAcc": 2.0, "maxNegAcc": 4.5, "usualPosAcc": 2.0, "usualNegAcc": 4.5, "minGap": 2.5, "maxSpeed": 11.111, "headwayTime": 2}, "route": ["road_3_0_1", "road_3_1_1", "road_3_2_1", "road_3_3_1", "road_3_4_1", "road_3_5_1", "road_3_6_1", "road_3_7_1", "road_3_8_1", "road_3_9_1", "road_3_10_1", "road_3_11_1", "road_3_12_1", "road_3_13_1", "road_3_14_1", "road_3_15_1", "road_3_16_1"], "interval": 1.0, "startTime": 331, "endTime": 331},
{"vehicle": {"length": 5.0, "width": 2.0, "maxPosAcc": 2.0, "maxNegAcc": 4.5, "usualPosAcc": 2.0, "usualNegAcc": 4.5, "minGap": 2.5, "maxSpeed": 11.111, "headwayTime": 2}, "route": ["road_0_8_0", "road_1_8_1", "road_1_9_2"], "interval": 1.0, "startTime": 333, "endTime": 333},
{"vehicle": {"length": 5.0, "width": 2.0, "maxPosAcc": 2.0, "maxNegAcc": 4.5, "usualPosAcc": 2.0, "usualNegAcc": 4.5, "minGap": 2.5, "maxSpeed": 11.111, "headwayTime": 2}, "route": ["road_4_9_2", "road_3_9_1", "road_3_10_1", "road_3_11_1", "road_3_12_1", "road_3_13_1", "road_3_14_0"], "interval": 1.0, "startTime": 334, "endTime": 334},
{"vehicle": {"length": 5.0, "width": 2.0, "maxPosAcc": 2.0, "maxNegAcc": 4.5, "usualPosAcc": 2.0, "usualNegAcc": 4.5, "minGap": 2.5, "maxSpeed": 11.111, "headwayTime": 2}, "route": ["road_4_13_2", "road_3_13_1", "road_3_14_2", "road_2_14_3", "road_2_13_3", "road_2_12_3", "road_2_11_3", "road_2_10_3", "road_2_9_3", "road_2_8_3", "road_2_7_3", "road_2_6_3", "road_2_5_3", "road_2_4_3", "road_2_3_0", "road_3_3_1", "road_3_4_0"], "interval": 1.0, "startTime": 335, "endTime": 335},
{"vehicle": {"length": 5.0, "width": 2.0, "maxPosAcc": 2.0, "maxNegAcc": 4.5, "usualPosAcc": 2.0, "usualNegAcc": 4.5, "minGap": 2.5, "maxSpeed": 11.111, "headwayTime": 2}, "route": ["road_4_3_2", "road_3_3_1", "road_3_4_1", "road_3_5_1", "road_3_6_1", "road_3_7_1", "road_3_8_1", "road_3_9_1", "road_3_10_1", "road_3_11_1", "road_3_12_1", "road_3_13_1", "road_3_14_1", "road_3_15_0"], "interval": 1.0, "startTime": 336, "endTime": 336},
{"vehicle": {"length": 5.0, "width": 2.0, "maxPosAcc": 2.0, "maxNegAcc": 4.5, "usualPosAcc": 2.0, "usualNegAcc": 4.5, "minGap": 2.5, "maxSpeed": 11.111, "headwayTime": 2}, "route": ["road_2_17_3", "road_2_16_3", "road_2_15_3", "road_2_14_3", "road_2_13_0", "road_3_13_0"], "interval": 1.0, "startTime": 338, "endTime": 338},
{"vehicle": {"length": 5.0, "width": 2.0, "maxPosAcc": 2.0, "maxNegAcc": 4.5, "usualPosAcc": 2.0, "usualNegAcc": 4.5, "minGap": 2.5, "maxSpeed": 11.111, "headwayTime": 2}, "route": ["road_0_12_0", "road_1_12_1", "road_1_13_0", "road_2_13_3", "road_2_12_3", "road_2_11_3", "road_2_10_3", "road_2_9_3", "road_2_8_3", "road_2_7_3", "road_2_6_3", "road_2_5_3", "road_2_4_3", "road_2_3_3", "road_2_2_3", "road_2_1_0", "road_3_1_1", "road_3_2_0"], "interval": 1.0, "startTime": 338, "endTime": 338},
{"vehicle": {"length": 5.0, "width": 2.0, "maxPosAcc": 2.0, "maxNegAcc": 4.5, "usualPosAcc": 2.0, "usualNegAcc": 4.5, "minGap": 2.5, "maxSpeed": 11.111, "headwayTime": 2}, "route": ["road_4_2_2", "road_3_2_2", "road_2_2_3", "road_2_1_0", "road_3_1_3"], "interval": 1.0, "startTime": 341, "endTime": 341},
{"vehicle": {"length": 5.0, "width": 2.0, "maxPosAcc": 2.0, "maxNegAcc": 4.5, "usualPosAcc": 2.0, "usualNegAcc": 4.5, "minGap": 2.5, "maxSpeed": 11.111, "headwayTime": 2}, "route": ["road_0_4_0", "road_1_4_1", "road_1_5_0", "road_2_5_0", "road_3_5_1", "road_3_6_1", "road_3_7_1", "road_3_8_1", "road_3_9_1", "road_3_10_1", "road_3_11_1", "road_3_12_1", "road_3_13_1", "road_3_14_0"], "interval": 1.0, "startTime": 344, "endTime": 344},
{"vehicle": {"length": 5.0, "width": 2.0, "maxPosAcc": 2.0, "maxNegAcc": 4.5, "usualPosAcc": 2.0, "usualNegAcc": 4.5, "minGap": 2.5, "maxSpeed": 11.111, "headwayTime": 2}, "route": ["road_4_12_2", "road_3_12_2", "road_2_12_3", "road_2_11_3", "road_2_10_3", "road_2_9_3", "road_2_8_3", "road_2_7_3", "road_2_6_3", "road_2_5_0", "road_3_5_1", "road_3_6_0"], "interval": 1.0, "startTime": 344, "endTime": 344},
{"vehicle": {"length": 5.0, "width": 2.0, "maxPosAcc": 2.0, "maxNegAcc": 4.5, "usualPosAcc": 2.0, "usualNegAcc": 4.5, "minGap": 2.5, "maxSpeed": 11.111, "headwayTime": 2}, "route": ["road_4_4_2", "road_3_4_1", "road_3_5_1", "road_3_6_0"], "interval": 1.0, "startTime": 347, "endTime": 347},
{"vehicle": {"length": 5.0, "width": 2.0, "maxPosAcc": 2.0, "maxNegAcc": 4.5, "usualPosAcc": 2.0, "usualNegAcc": 4.5, "minGap": 2.5, "maxSpeed": 11.111, "headwayTime": 2}, "route": ["road_4_13_2", "road_3_13_1", "road_3_14_2", "road_2_14_3", "road_2_13_3", "road_2_12_3", "road_2_11_3", "road_2_10_3", "road_2_9_3", "road_2_8_3", "road_2_7_3", "road_2_6_2", "road_1_6_2"], "interval": 1.0, "startTime": 347, "endTime": 347},
{"vehicle": {"length": 5.0, "width": 2.0, "maxPosAcc": 2.0, "maxNegAcc": 4.5, "usualPosAcc": 2.0, "usualNegAcc": 4.5, "minGap": 2.5, "maxSpeed": 11.111, "headwayTime": 2}, "route": ["road_2_0_1", "road_2_1_0", "road_3_1_1", "road_3_2_1", "road_3_3_1", "road_3_4_1", "road_3_5_1", "road_3_6_1", "road_3_7_1", "road_3_8_1", "road_3_9_1", "road_3_10_1", "road_3_11_1", "road_3_12_1", "road_3_13_0"], "interval": 1.0, "startTime": 350, "endTime": 350},
{"vehicle": {"length": 5.0, "width": 2.0, "maxPosAcc": 2.0, "maxNegAcc": 4.5, "usualPosAcc": 2.0, "usualNegAcc": 4.5, "minGap": 2.5, "maxSpeed": 11.111, "headwayTime": 2}, "route": ["road_4_2_2", "road_3_2_2", "road_2_2_2", "road_1_2_1", "road_1_3_2"], "interval": 1.0, "startTime": 353, "endTime": 353},
{"vehicle": {"length": 5.0, "width": 2.0, "maxPosAcc": 2.0, "maxNegAcc": 4.5, "usualPosAcc": 2.0, "usualNegAcc": 4.5, "minGap": 2.5, "maxSpeed": 11.111, "headwayTime": 2}, "route": ["road_4_8_2", "road_3_8_2", "road_2_8_3", "road_2_7_3", "road_2_6_3", "road_2_5_3", "road_2_4_3", "road_2_3_3", "road_2_2_3", "road_2_1_0", "road_3_1_1", "road_3_2_0"], "interval": 1.0, "startTime": 360, "endTime": 360},
{"vehicle": {"length": 5.0, "width": 2.0, "maxPosAcc": 2.0, "maxNegAcc": 4.5, "usualPosAcc": 2.0, "usualNegAcc": 4.5, "minGap": 2.5, "maxSpeed": 11.111, "headwayTime": 2}, "route": ["road_4_4_2", "road_3_4_1", "road_3_5_1", "road_3_6_1", "road_3_7_1", "road_3_8_1", "road_3_9_1", "road_3_10_1", "road_3_11_1", "road_3_12_1", "road_3_13_1", "road_3_14_1", "road_3_15_0"], "interval": 1.0, "startTime": 360, "endTime": 360},
{"vehicle": {"length": 5.0, "width": 2.0, "maxPosAcc": 2.0, "maxNegAcc": 4.5, "usualPosAcc": 2.0, "usualNegAcc": 4.5, "minGap": 2.5, "maxSpeed": 11.111, "headwayTime": 2}, "route": ["road_0_4_0", "road_1_4_1", "road_1_5_1", "road_1_6_1", "road_1_7_1", "road_1_8_1", "road_1_9_1", "road_1_10_1", "road_1_11_1", "road_1_12_1", "road_1_13_1", "road_1_14_1", "road_1_15_1", "road_1_16_0", "road_2_16_1"], "interval": 1.0, "startTime": 360, "endTime": 360},
{"vehicle": {"length": 5.0, "width": 2.0, "maxPosAcc": 2.0, "maxNegAcc": 4.5, "usualPosAcc": 2.0, "usualNegAcc": 4.5, "minGap": 2.5, "maxSpeed": 11.111, "headwayTime": 2}, "route": ["road_3_0_1", "road_3_1_1", "road_3_2_1", "road_3_3_1", "road_3_4_1", "road_3_5_0"], "interval": 1.0, "startTime": 360, "endTime": 360},
{"vehicle": {"length": 5.0, "width": 2.0, "maxPosAcc": 2.0, "maxNegAcc": 4.5, "usualPosAcc": 2.0, "usualNegAcc": 4.5, "minGap": 2.5, "maxSpeed": 11.111, "headwayTime": 2}, "route": ["road_4_3_2", "road_3_3_1", "road_3_4_2", "road_2_4_3", "road_2_3_3", "road_2_2_3", "road_2_1_0", "road_3_1_3"], "interval": 1.0, "startTime": 360, "endTime": 360},
{"vehicle": {"length": 5.0, "width": 2.0, "maxPosAcc": 2.0, "maxNegAcc": 4.5, "usualPosAcc": 2.0, "usualNegAcc": 4.5, "minGap": 2.5, "maxSpeed": 11.111, "headwayTime": 2}, "route": ["road_4_5_2", "road_3_5_1", "road_3_6_1", "road_3_7_1", "road_3_8_1", "road_3_9_1", "road_3_10_1", "road_3_11_1", "road_3_12_1", "road_3_13_1", "road_3_14_1", "road_3_15_1", "road_3_16_1"], "interval": 1.0, "startTime": 360, "endTime": 360},
{"vehicle": {"length": 5.0, "width": 2.0, "maxPosAcc": 2.0, "maxNegAcc": 4.5, "usualPosAcc": 2.0, "usualNegAcc": 4.5, "minGap": 2.5, "maxSpeed": 11.111, "headwayTime": 2}, "route": ["road_4_6_2", "road_3_6_2", "road_2_6_3", "road_2_5_3", "road_2_4_3", "road_2_3_3", "road_2_2_3", "road_2_1_0", "road_3_1_3"], "interval": 1.0, "startTime": 360, "endTime": 360},
{"vehicle": {"length": 5.0, "width": 2.0, "maxPosAcc": 2.0, "maxNegAcc": 4.5, "usualPosAcc": 2.0, "usualNegAcc": 4.5, "minGap": 2.5, "maxSpeed": 11.111, "headwayTime": 2}, "route": ["road_4_7_2", "road_3_7_1", "road_3_8_1", "road_3_9_1", "road_3_10_1", "road_3_11_0"], "interval": 1.0, "startTime": 360, "endTime": 360},
{"vehicle": {"length": 5.0, "width": 2.0, "maxPosAcc": 2.0, "maxNegAcc": 4.5, "usualPosAcc": 2.0, "usualNegAcc": 4.5, "minGap": 2.5, "maxSpeed": 11.111, "headwayTime": 2}, "route": ["road_4_9_2", "road_3_9_1", "road_3_10_2", "road_2_10_3", "road_2_9_3", "road_2_8_3", "road_2_7_3", "road_2_6_3", "road_2_5_3", "road_2_4_3", "road_2_3_3", "road_2_2_3", "road_2_1_2", "road_1_1_3"], "interval": 1.0, "startTime": 360, "endTime": 360},
{"vehicle": {"length": 5.0, "width": 2.0, "maxPosAcc": 2.0, "maxNegAcc": 4.5, "usualPosAcc": 2.0, "usualNegAcc": 4.5, "minGap": 2.5, "maxSpeed": 11.111, "headwayTime": 2}, "route": ["road_4_10_2", "road_3_10_2", "road_2_10_3", "road_2_9_3", "road_2_8_3", "road_2_7_0", "road_3_7_1", "road_3_8_0"], "interval": 1.0, "startTime": 360, "endTime": 360},
{"vehicle": {"length": 5.0, "width": 2.0, "maxPosAcc": 2.0, "maxNegAcc": 4.5, "usualPosAcc": 2.0, "usualNegAcc": 4.5, "minGap": 2.5, "maxSpeed": 11.111, "headwayTime": 2}, "route": ["road_4_11_2", "road_3_11_1", "road_3_12_1", "road_3_13_1", "road_3_14_1", "road_3_15_1", "road_3_16_1"], "interval": 1.0, "startTime": 360, "endTime": 360},
{"vehicle": {"length": 5.0, "width": 2.0, "maxPosAcc": 2.0, "maxNegAcc": 4.5, "usualPosAcc": 2.0, "usualNegAcc": 4.5, "minGap": 2.5, "maxSpeed": 11.111, "headwayTime": 2}, "route": ["road_4_13_2", "road_3_13_1", "road_3_14_2", "road_2_14_3", "road_2_13_3", "road_2_12_3", "road_2_11_3", "road_2_10_3", "road_2_9_3", "road_2_8_3", "road_2_7_0", "road_3_7_1", "road_3_8_0"], "interval": 1.0, "startTime": 360, "endTime": 360},
{"vehicle": {"length": 5.0, "width": 2.0, "maxPosAcc": 2.0, "maxNegAcc": 4.5, "usualPosAcc": 2.0, "usualNegAcc": 4.5, "minGap": 2.5, "maxSpeed": 11.111, "headwayTime": 2}, "route": ["road_4_14_2", "road_3_14_2", "road_2_14_3", "road_2_13_3", "road_2_12_3", "road_2_11_3", "road_2_10_3", "road_2_9_3", "road_2_8_3", "road_2_7_0", "road_3_7_0"], "interval": 1.0, "startTime": 360, "endTime": 360},
{"vehicle": {"length": 5.0, "width": 2.0, "maxPosAcc": 2.0, "maxNegAcc": 4.5, "usualPosAcc": 2.0, "usualNegAcc": 4.5, "minGap": 2.5, "maxSpeed": 11.111, "headwayTime": 2}, "route": ["road_3_17_3", "road_3_16_2", "road_2_16_3", "road_2_15_3", "road_2_14_3", "road_2_13_3", "road_2_12_3", "road_2_11_0", "road_3_11_0"], "interval": 1.0, "startTime": 360, "endTime": 360},
{"vehicle": {"length": 5.0, "width": 2.0, "maxPosAcc": 2.0, "maxNegAcc": 4.5, "usualPosAcc": 2.0, "usualNegAcc": 4.5, "minGap": 2.5, "maxSpeed": 11.111, "headwayTime": 2}, "route": ["road_2_0_1", "road_2_1_0", "road_3_1_1", "road_3_2_1", "road_3_3_1", "road_3_4_1", "road_3_5_1", "road_3_6_1", "road_3_7_1", "road_3_8_1", "road_3_9_1", "road_3_10_0"], "interval": 1.0, "startTime": 360, "endTime": 360},
{"vehicle": {"length": 5.0, "width": 2.0, "maxPosAcc": 2.0, "maxNegAcc": 4.5, "usualPosAcc": 2.0, "usualNegAcc": 4.5, "minGap": 2.5, "maxSpeed": 11.111, "headwayTime": 2}, "route": ["road_1_0_1", "road_1_1_1", "road_1_2_1", "road_1_3_1", "road_1_4_1", "road_1_5_1", "road_1_6_1", "road_1_7_1", "road_1_8_1", "road_1_9_1", "road_1_10_1", "road_1_11_1", "road_1_12_1", "road_1_13_1", "road_1_14_1", "road_1_15_1", "road_1_16_1"], "interval": 1.0, "startTime": 360, "endTime": 360},
{"vehicle": {"length": 5.0, "width": 2.0, "maxPosAcc": 2.0, "maxNegAcc": 4.5, "usualPosAcc": 2.0, "usualNegAcc": 4.5, "minGap": 2.5, "maxSpeed": 11.111, "headwayTime": 2}, "route": ["road_0_9_0", "road_1_9_0", "road_2_9_3", "road_2_8_3", "road_2_7_3", "road_2_6_3", "road_2_5_3", "road_2_4_2", "road_1_4_1", "road_1_5_2"], "interval": 1.0, "startTime": 360, "endTime": 360},
{"vehicle": {"length": 5.0, "width": 2.0, "maxPosAcc": 2.0, "maxNegAcc": 4.5, "usualPosAcc": 2.0, "usualNegAcc": 4.5, "minGap": 2.5, "maxSpeed": 11.111, "headwayTime": 2}, "route": ["road_0_14_0", "road_1_14_1", "road_1_15_0", "road_2_15_3", "road_2_14_3", "road_2_13_3", "road_2_12_3", "road_2_11_3", "road_2_10_3", "road_2_9_3", "road_2_8_3", "road_2_7_3", "road_2_6_3", "road_2_5_3", "road_2_4_3", "road_2_3_3", "road_2_2_2", "road_1_2_2"], "interval": 1.0, "startTime": 360, "endTime": 360},
{"vehicle": {"length": 5.0, "width": 2.0, "maxPosAcc": 2.0, "maxNegAcc": 4.5, "usualPosAcc": 2.0, "usualNegAcc": 4.5, "minGap": 2.5, "maxSpeed": 11.111, "headwayTime": 2}, "route": ["road_0_3_0", "road_1_3_0", "road_2_3_0", "road_3_3_1", "road_3_4_1", "road_3_5_1", "road_3_6_0"], "interval": 1.0, "startTime": 360, "endTime": 360},
{"vehicle": {"length": 5.0, "width": 2.0, "maxPosAcc": 2.0, "maxNegAcc": 4.5, "usualPosAcc": 2.0, "usualNegAcc": 4.5, "minGap": 2.5, "maxSpeed": 11.111, "headwayTime": 2}, "route": ["road_2_17_3", "road_2_16_3", "road_2_15_3", "road_2_14_3", "road_2_13_3", "road_2_12_3", "road_2_11_3", "road_2_10_3", "road_2_9_0", "road_3_9_1", "road_3_10_0"], "interval": 1.0, "startTime": 360, "endTime": 360},
{"vehicle": {"length": 5.0, "width": 2.0, "maxPosAcc": 2.0, "maxNegAcc": 4.5, "usualPosAcc": 2.0, "usualNegAcc": 4.5, "minGap": 2.5, "maxSpeed": 11.111, "headwayTime": 2}, "route": ["road_0_11_0", "road_1_11_1", "road_1_12_1", "road_1_13_1", "road_1_14_1", "road_1_15_2"], "interval": 1.0, "startTime": 360, "endTime": 360},
{"vehicle": {"length": 5.0, "width": 2.0, "maxPosAcc": 2.0, "maxNegAcc": 4.5, "usualPosAcc": 2.0, "usualNegAcc": 4.5, "minGap": 2.5, "maxSpeed": 11.111, "headwayTime": 2}, "route": ["road_0_12_0", "road_1_12_1", "road_1_13_0", "road_2_13_3", "road_2_12_3", "road_2_11_3", "road_2_10_3", "road_2_9_3", "road_2_8_3", "road_2_7_3", "road_2_6_3", "road_2_5_3", "road_2_4_3", "road_2_3_3", "road_2_2_3", "road_2_1_3"], "interval": 1.0, "startTime": 360, "endTime": 360},
{"vehicle": {"length": 5.0, "width": 2.0, "maxPosAcc": 2.0, "maxNegAcc": 4.5, "usualPosAcc": 2.0, "usualNegAcc": 4.5, "minGap": 2.5, "maxSpeed": 11.111, "headwayTime": 2}, "route": ["road_1_17_3", "road_1_16_0", "road_2_16_3", "road_2_15_3", "road_2_14_3", "road_2_13_3", "road_2_12_3", "road_2_11_3", "road_2_10_3", "road_2_9_3", "road_2_8_3", "road_2_7_3", "road_2_6_3", "road_2_5_3", "road_2_4_3", "road_2_3_0", "road_3_3_0"], "interval": 1.0, "startTime": 360, "endTime": 360},
{"vehicle": {"length": 5.0, "width": 2.0, "maxPosAcc": 2.0, "maxNegAcc": 4.5, "usualPosAcc": 2.0, "usualNegAcc": 4.5, "minGap": 2.5, "maxSpeed": 11.111, "headwayTime": 2}, "route": ["road_0_5_0", "road_1_5_0", "road_2_5_3", "road_2_4_3", "road_2_3_3", "road_2_2_3", "road_2_1_3"], "interval": 1.0, "startTime": 360, "endTime": 360},
{"vehicle": {"length": 5.0, "width": 2.0, "maxPosAcc": 2.0, "maxNegAcc": 4.5, "usualPosAcc": 2.0, "usualNegAcc": 4.5, "minGap": 2.5, "maxSpeed": 11.111, "headwayTime": 2}, "route": ["road_4_2_2", "road_3_2_2", "road_2_2_2", "road_1_2_2"], "interval": 1.0, "startTime": 360, "endTime": 360},
{"vehicle": {"length": 5.0, "width": 2.0, "maxPosAcc": 2.0, "maxNegAcc": 4.5, "usualPosAcc": 2.0, "usualNegAcc": 4.5, "minGap": 2.5, "maxSpeed": 11.111, "headwayTime": 2}, "route": ["road_4_13_2", "road_3_13_1", "road_3_14_2", "road_2_14_3", "road_2_13_3", "road_2_12_3", "road_2_11_3", "road_2_10_3", "road_2_9_3", "road_2_8_3", "road_2_7_3", "road_2_6_3", "road_2_5_3", "road_2_4_3", "road_2_3_3", "road_2_2_3", "road_2_1_3"], "interval": 1.0, "startTime": 366, "endTime": 366},
{"vehicle": {"length": 5.0, "width": 2.0, "maxPosAcc": 2.0, "maxNegAcc": 4.5, "usualPosAcc": 2.0, "usualNegAcc": 4.5, "minGap": 2.5, "maxSpeed": 11.111, "headwayTime": 2}, "route": ["road_2_17_3", "road_2_16_3", "road_2_15_3", "road_2_14_3", "road_2_13_0", "road_3_13_0"], "interval": 1.0, "startTime": 368, "endTime": 368},
{"vehicle": {"length": 5.0, "width": 2.0, "maxPosAcc": 2.0, "maxNegAcc": 4.5, "usualPosAcc": 2.0, "usualNegAcc": 4.5, "minGap": 2.5, "maxSpeed": 11.111, "headwayTime": 2}, "route": ["road_3_0_1", "road_3_1_1", "road_3_2_1", "road_3_3_1", "road_3_4_1", "road_3_5_1", "road_3_6_1", "road_3_7_1", "road_3_8_1", "road_3_9_1", "road_3_10_1", "road_3_11_1", "road_3_12_1", "road_3_13_1", "road_3_14_1", "road_3_15_1", "road_3_16_1"], "interval": 1.0, "startTime": 370, "endTime": 370},
{"vehicle": {"length": 5.0, "width": 2.0, "maxPosAcc": 2.0, "maxNegAcc": 4.5, "usualPosAcc": 2.0, "usualNegAcc": 4.5, "minGap": 2.5, "maxSpeed": 11.111, "headwayTime": 2}, "route": ["road_2_0_1", "road_2_1_0", "road_3_1_1", "road_3_2_1", "road_3_3_1", "road_3_4_1", "road_3_5_1", "road_3_6_0"], "interval": 1.0, "startTime": 370, "endTime": 370},
{"vehicle": {"length": 5.0, "width": 2.0, "maxPosAcc": 2.0, "maxNegAcc": 4.5, "usualPosAcc": 2.0, "usualNegAcc": 4.5, "minGap": 2.5, "maxSpeed": 11.111, "headwayTime": 2}, "route": ["road_4_14_2", "road_3_14_2", "road_2_14_2", "road_1_14_2"], "interval": 1.0, "startTime": 371, "endTime": 371},
{"vehicle": {"length": 5.0, "width": 2.0, "maxPosAcc": 2.0, "maxNegAcc": 4.5, "usualPosAcc": 2.0, "usualNegAcc": 4.5, "minGap": 2.5, "maxSpeed": 11.111, "headwayTime": 2}, "route": ["road_3_17_3", "road_3_16_2", "road_2_16_3", "road_2_15_3", "road_2_14_3", "road_2_13_0", "road_3_13_0"], "interval": 1.0, "startTime": 375, "endTime": 375},
{"vehicle": {"length": 5.0, "width": 2.0, "maxPosAcc": 2.0, "maxNegAcc": 4.5, "usualPosAcc": 2.0, "usualNegAcc": 4.5, "minGap": 2.5, "maxSpeed": 11.111, "headwayTime": 2}, "route": ["road_2_0_1", "road_2_1_0", "road_3_1_1", "road_3_2_1", "road_3_3_1", "road_3_4_1", "road_3_5_1", "road_3_6_1", "road_3_7_0"], "interval": 1.0, "startTime": 377, "endTime": 377},
{"vehicle": {"length": 5.0, "width": 2.0, "maxPosAcc": 2.0, "maxNegAcc": 4.5, "usualPosAcc": 2.0, "usualNegAcc": 4.5, "minGap": 2.5, "maxSpeed": 11.111, "headwayTime": 2}, "route": ["road_2_17_3", "road_2_16_3", "road_2_15_3", "road_2_14_3", "road_2_13_3", "road_2_12_3", "road_2_11_3", "road_2_10_3", "road_2_9_3", "road_2_8_2", "road_1_8_1", "road_1_9_2"], "interval": 1.0, "startTime": 379, "endTime": 379},
{"vehicle": {"length": 5.0, "width": 2.0, "maxPosAcc": 2.0, "maxNegAcc": 4.5, "usualPosAcc": 2.0, "usualNegAcc": 4.5, "minGap": 2.5, "maxSpeed": 11.111, "headwayTime": 2}, "route": ["road_2_17_3", "road_2_16_0", "road_3_16_1"], "interval": 1.0, "startTime": 380, "endTime": 380},
{"vehicle": {"length": 5.0, "width": 2.0, "maxPosAcc": 2.0, "maxNegAcc": 4.5, "usualPosAcc": 2.0, "usualNegAcc": 4.5, "minGap": 2.5, "maxSpeed": 11.111, "headwayTime": 2}, "route": ["road_3_0_1", "road_3_1_1", "road_3_2_1", "road_3_3_1", "road_3_4_0"], "interval": 1.0, "startTime": 381, "endTime": 381},
{"vehicle": {"length": 5.0, "width": 2.0, "maxPosAcc": 2.0, "maxNegAcc": 4.5, "usualPosAcc": 2.0, "usualNegAcc": 4.5, "minGap": 2.5, "maxSpeed": 11.111, "headwayTime": 2}, "route": ["road_0_3_0", "road_1_3_1", "road_1_4_2"], "interval": 1.0, "startTime": 382, "endTime": 382},
{"vehicle": {"length": 5.0, "width": 2.0, "maxPosAcc": 2.0, "maxNegAcc": 4.5, "usualPosAcc": 2.0, "usualNegAcc": 4.5, "minGap": 2.5, "maxSpeed": 11.111, "headwayTime": 2}, "route": ["road_3_17_3", "road_3_16_2", "road_2_16_3", "road_2_15_3", "road_2_14_3", "road_2_13_3", "road_2_12_3", "road_2_11_3", "road_2_10_3", "road_2_9_3", "road_2_8_3", "road_2_7_3", "road_2_6_3", "road_2_5_3", "road_2_4_3", "road_2_3_3", "road_2_2_3", "road_2_1_0", "road_3_1_1", "road_3_2_0"], "interval": 1.0, "startTime": 384, "endTime": 384},
{"vehicle": {"length": 5.0, "width": 2.0, "maxPosAcc": 2.0, "maxNegAcc": 4.5, "usualPosAcc": 2.0, "usualNegAcc": 4.5, "minGap": 2.5, "maxSpeed": 11.111, "headwayTime": 2}, "route": ["road_0_9_0", "road_1_9_0", "road_2_9_0", "road_3_9_0"], "interval": 1.0, "startTime": 389, "endTime": 389},
{"vehicle": {"length": 5.0, "width": 2.0, "maxPosAcc": 2.0, "maxNegAcc": 4.5, "usualPosAcc": 2.0, "usualNegAcc": 4.5, "minGap": 2.5, "maxSpeed": 11.111, "headwayTime": 2}, "route": ["road_4_11_2", "road_3_11_1", "road_3_12_2", "road_2_12_3", "road_2_11_3", "road_2_10_3", "road_2_9_3", "road_2_8_3", "road_2_7_3", "road_2_6_3", "road_2_5_3", "road_2_4_3", "road_2_3_3", "road_2_2_3", "road_2_1_3"], "interval": 1.0, "startTime": 400, "endTime": 400},
{"vehicle": {"length": 5.0, "width": 2.0, "maxPosAcc": 2.0, "maxNegAcc": 4.5, "usualPosAcc": 2.0, "usualNegAcc": 4.5, "minGap": 2.5, "maxSpeed": 11.111, "headwayTime": 2}, "route": ["road_4_7_2", "road_3_7_1", "road_3_8_2", "road_2_8_3", "road_2_7_3", "road_2_6_3", "road_2_5_0", "road_3_5_0"], "interval": 1.0, "startTime": 402, "endTime": 402},
{"vehicle": {"length": 5.0, "width": 2.0, "maxPosAcc": 2.0, "maxNegAcc": 4.5, "usualPosAcc": 2.0, "usualNegAcc": 4.5, "minGap": 2.5, "maxSpeed": 11.111, "headwayTime": 2}, "route": ["road_3_17_3", "road_3_16_2", "road_2_16_3", "road_2_15_3", "road_2_14_3", "road_2_13_3", "road_2_12_3", "road_2_11_3", "road_2_10_3", "road_2_9_3", "road_2_8_3", "road_2_7_3", "road_2_6_3", "road_2_5_3", "road_2_4_3", "road_2_3_3", "road_2_2_3", "road_2_1_0", "road_3_1_3"], "interval": 1.0, "startTime": 402, "endTime": 402},
{"vehicle": {"length": 5.0, "width": 2.0, "maxPosAcc": 2.0, "maxNegAcc": 4.5, "usualPosAcc": 2.0, "usualNegAcc": 4.5, "minGap": 2.5, "maxSpeed": 11.111, "headwayTime": 2}, "route": ["road_2_17_3", "road_2_16_3", "road_2_15_3", "road_2_14_3", "road_2_13_0", "road_3_13_1", "road_3_14_0"], "interval": 1.0, "startTime": 403, "endTime": 403},
{"vehicle": {"length": 5.0, "width": 2.0, "maxPosAcc": 2.0, "maxNegAcc": 4.5, "usualPosAcc": 2.0, "usualNegAcc": 4.5, "minGap": 2.5, "maxSpeed": 11.111, "headwayTime": 2}, "route": ["road_4_13_2", "road_3_13_1", "road_3_14_1", "road_3_15_1", "road_3_16_1"], "interval": 1.0, "startTime": 406, "endTime": 406},
{"vehicle": {"length": 5.0, "width": 2.0, "maxPosAcc": 2.0, "maxNegAcc": 4.5, "usualPosAcc": 2.0, "usualNegAcc": 4.5, "minGap": 2.5, "maxSpeed": 11.111, "headwayTime": 2}, "route": ["road_0_5_0", "road_1_5_0", "road_2_5_0", "road_3_5_1", "road_3_6_1", "road_3_7_0"], "interval": 1.0, "startTime": 406, "endTime": 406},
{"vehicle": {"length": 5.0, "width": 2.0, "maxPosAcc": 2.0, "maxNegAcc": 4.5, "usualPosAcc": 2.0, "usualNegAcc": 4.5, "minGap": 2.5, "maxSpeed": 11.111, "headwayTime": 2}, "route": ["road_4_13_2", "road_3_13_1", "road_3_14_2", "road_2_14_3", "road_2_13_3", "road_2_12_3", "road_2_11_3", "road_2_10_3", "road_2_9_3", "road_2_8_3", "road_2_7_3", "road_2_6_2", "road_1_6_2"], "interval": 1.0, "startTime": 407, "endTime": 407},
{"vehicle": {"length": 5.0, "width": 2.0, "maxPosAcc": 2.0, "maxNegAcc": 4.5, "usualPosAcc": 2.0, "usualNegAcc": 4.5, "minGap": 2.5, "maxSpeed": 11.111, "headwayTime": 2}, "route": ["road_1_17_3", "road_1_16_0", "road_2_16_0", "road_3_16_1"], "interval": 1.0, "startTime": 407, "endTime": 407},
{"vehicle": {"length": 5.0, "width": 2.0, "maxPosAcc": 2.0, "maxNegAcc": 4.5, "usualPosAcc": 2.0, "usualNegAcc": 4.5, "minGap": 2.5, "maxSpeed": 11.111, "headwayTime": 2}, "route": ["road_3_0_1", "road_3_1_1", "road_3_2_1", "road_3_3_1", "road_3_4_1", "road_3_5_1", "road_3_6_1", "road_3_7_1", "road_3_8_1", "road_3_9_1", "road_3_10_1", "road_3_11_1", "road_3_12_1", "road_3_13_1", "road_3_14_1", "road_3_15_1", "road_3_16_1"], "interval": 1.0, "startTime": 408, "endTime": 408},
{"vehicle": {"length": 5.0, "width": 2.0, "maxPosAcc": 2.0, "maxNegAcc": 4.5, "usualPosAcc": 2.0, "usualNegAcc": 4.5, "minGap": 2.5, "maxSpeed": 11.111, "headwayTime": 2}, "route": ["road_0_3_0", "road_1_3_0", "road_2_3_0", "road_3_3_1", "road_3_4_1", "road_3_5_1", "road_3_6_0"], "interval": 1.0, "startTime": 408, "endTime": 408},
{"vehicle": {"length": 5.0, "width": 2.0, "maxPosAcc": 2.0, "maxNegAcc": 4.5, "usualPosAcc": 2.0, "usualNegAcc": 4.5, "minGap": 2.5, "maxSpeed": 11.111, "headwayTime": 2}, "route": ["road_4_8_2", "road_3_8_1", "road_3_9_1", "road_3_10_0"], "interval": 1.0, "startTime": 414, "endTime": 414},
{"vehicle": {"length": 5.0, "width": 2.0, "maxPosAcc": 2.0, "maxNegAcc": 4.5, "usualPosAcc": 2.0, "usualNegAcc": 4.5, "minGap": 2.5, "maxSpeed": 11.111, "headwayTime": 2}, "route": ["road_3_17_3", "road_3_16_2", "road_2_16_3", "road_2_15_3", "road_2_14_3", "road_2_13_3", "road_2_12_3", "road_2_11_3", "road_2_10_3", "road_2_9_3", "road_2_8_3", "road_2_7_3", "road_2_6_3", "road_2_5_3", "road_2_4_3", "road_2_3_3", "road_2_2_3", "road_2_1_0", "road_3_1_1", "road_3_2_0"], "interval": 1.0, "startTime": 416, "endTime": 416},
{"vehicle": {"length": 5.0, "width": 2.0, "maxPosAcc": 2.0, "maxNegAcc": 4.5, "usualPosAcc": 2.0, "usualNegAcc": 4.5, "minGap": 2.5, "maxSpeed": 11.111, "headwayTime": 2}, "route": ["road_0_8_0", "road_1_8_1", "road_1_9_0", "road_2_9_3", "road_2_8_3", "road_2_7_3", "road_2_6_3", "road_2_5_3", "road_2_4_3", "road_2_3_0", "road_3_3_0"], "interval": 1.0, "startTime": 420, "endTime": 420},
{"vehicle": {"length": 5.0, "width": 2.0, "maxPosAcc": 2.0, "maxNegAcc": 4.5, "usualPosAcc": 2.0, "usualNegAcc": 4.5, "minGap": 2.5, "maxSpeed": 11.111, "headwayTime": 2}, "route": ["road_4_4_2", "road_3_4_2", "road_2_4_2", "road_1_4_1", "road_1_5_1", "road_1_6_1", "road_1_7_1", "road_1_8_1", "road_1_9_1", "road_1_10_1", "road_1_11_2"], "interval": 1.0, "startTime": 420, "endTime": 420},
{"vehicle": {"length": 5.0, "width": 2.0, "maxPosAcc": 2.0, "maxNegAcc": 4.5, "usualPosAcc": 2.0, "usualNegAcc": 4.5, "minGap": 2.5, "maxSpeed": 11.111, "headwayTime": 2}, "route": ["road_3_0_1", "road_3_1_1", "road_3_2_1", "road_3_3_1", "road_3_4_1", "road_3_5_0"], "interval": 1.0, "startTime": 420, "endTime": 420},
{"vehicle": {"length": 5.0, "width": 2.0, "maxPosAcc": 2.0, "maxNegAcc": 4.5, "usualPosAcc": 2.0, "usualNegAcc": 4.5, "minGap": 2.5, "maxSpeed": 11.111, "headwayTime": 2}, "route": ["road_4_5_2", "road_3_5_1", "road_3_6_2", "road_2_6_3", "road_2_5_3", "road_2_4_3", "road_2_3_3", "road_2_2_3", "road_2_1_2", "road_1_1_3"], "interval": 1.0, "startTime": 420, "endTime": 420},
{"vehicle": {"length": 5.0, "width": 2.0, "maxPosAcc": 2.0, "maxNegAcc": 4.5, "usualPosAcc": 2.0, "usualNegAcc": 4.5, "minGap": 2.5, "maxSpeed": 11.111, "headwayTime": 2}, "route": ["road_4_6_2", "road_3_6_1", "road_3_7_1", "road_3_8_2", "road_2_8_2", "road_1_8_1", "road_1_9_1", "road_1_10_2"], "interval": 1.0, "startTime": 420, "endTime": 420},
{"vehicle": {"length": 5.0, "width": 2.0, "maxPosAcc": 2.0, "maxNegAcc": 4.5, "usualPosAcc": 2.0, "usualNegAcc": 4.5, "minGap": 2.5, "maxSpeed": 11.111, "headwayTime": 2}, "route": ["road_4_9_2", "road_3_9_1", "road_3_10_1", "road_3_11_0"], "interval": 1.0, "startTime": 420, "endTime": 420},
{"vehicle": {"length": 5.0, "width": 2.0, "maxPosAcc": 2.0, "maxNegAcc": 4.5, "usualPosAcc": 2.0, "usualNegAcc": 4.5, "minGap": 2.5, "maxSpeed": 11.111, "headwayTime": 2}, "route": ["road_4_10_2", "road_3_10_2", "road_2_10_3", "road_2_9_3", "road_2_8_3", "road_2_7_3", "road_2_6_3", "road_2_5_0", "road_3_5_1", "road_3_6_0"], "interval": 1.0, "startTime": 420, "endTime": 420},
{"vehicle": {"length": 5.0, "width": 2.0, "maxPosAcc": 2.0, "maxNegAcc": 4.5, "usualPosAcc": 2.0, "usualNegAcc": 4.5, "minGap": 2.5, "maxSpeed": 11.111, "headwayTime": 2}, "route": ["road_4_11_2", "road_3_11_1", "road_3_12_2", "road_2_12_3", "road_2_11_3", "road_2_10_3", "road_2_9_3", "road_2_8_3", "road_2_7_3", "road_2_6_3", "road_2_5_3", "road_2_4_3", "road_2_3_3", "road_2_2_3", "road_2_1_0", "road_3_1_3"], "interval": 1.0, "startTime": 420, "endTime": 420},
{"vehicle": {"length": 5.0, "width": 2.0, "maxPosAcc": 2.0, "maxNegAcc": 4.5, "usualPosAcc": 2.0, "usualNegAcc": 4.5, "minGap": 2.5, "maxSpeed": 11.111, "headwayTime": 2}, "route": ["road_4_12_2", "road_3_12_1", "road_3_13_1", "road_3_14_0"], "interval": 1.0, "startTime": 420, "endTime": 420},
{"vehicle": {"length": 5.0, "width": 2.0, "maxPosAcc": 2.0, "maxNegAcc": 4.5, "usualPosAcc": 2.0, "usualNegAcc": 4.5, "minGap": 2.5, "maxSpeed": 11.111, "headwayTime": 2}, "route": ["road_4_14_2", "road_3_14_2", "road_2_14_3", "road_2_13_3", "road_2_12_3", "road_2_11_3", "road_2_10_3", "road_2_9_3", "road_2_8_3", "road_2_7_3", "road_2_6_3", "road_2_5_0", "road_3_5_1", "road_3_6_0"], "interval": 1.0, "startTime": 420, "endTime": 420},
{"vehicle": {"length": 5.0, "width": 2.0, "maxPosAcc": 2.0, "maxNegAcc": 4.5, "usualPosAcc": 2.0, "usualNegAcc": 4.5, "minGap": 2.5, "maxSpeed": 11.111, "headwayTime": 2}, "route": ["road_2_0_1", "road_2_1_0", "road_3_1_1", "road_3_2_1", "road_3_3_1", "road_3_4_1", "road_3_5_1", "road_3_6_1", "road_3_7_1", "road_3_8_1", "road_3_9_1", "road_3_10_1", "road_3_11_1", "road_3_12_1", "road_3_13_1", "road_3_14_0"], "interval": 1.0, "startTime": 420, "endTime": 420},
{"vehicle": {"length": 5.0, "width": 2.0, "maxPosAcc": 2.0, "maxNegAcc": 4.5, "usualPosAcc": 2.0, "usualNegAcc": 4.5, "minGap": 2.5, "maxSpeed": 11.111, "headwayTime": 2}, "route": ["road_1_0_1", "road_1_1_1", "road_1_2_1", "road_1_3_0", "road_2_3_0", "road_3_3_1", "road_3_4_1", "road_3_5_1", "road_3_6_0"], "interval": 1.0, "startTime": 420, "endTime": 420},
{"vehicle": {"length": 5.0, "width": 2.0, "maxPosAcc": 2.0, "maxNegAcc": 4.5, "usualPosAcc": 2.0, "usualNegAcc": 4.5, "minGap": 2.5, "maxSpeed": 11.111, "headwayTime": 2}, "route": ["road_0_7_0", "road_1_7_1", "road_1_8_1", "road_1_9_1", "road_1_10_1", "road_1_11_1", "road_1_12_1", "road_1_13_1", "road_1_14_1", "road_1_15_0", "road_2_15_0", "road_3_15_0"], "interval": 1.0, "startTime": 420, "endTime": 420},
{"vehicle": {"length": 5.0, "width": 2.0, "maxPosAcc": 2.0, "maxNegAcc": 4.5, "usualPosAcc": 2.0, "usualNegAcc": 4.5, "minGap": 2.5, "maxSpeed": 11.111, "headwayTime": 2}, "route": ["road_2_17_3", "road_2_16_0", "road_3_16_1"], "interval": 1.0, "startTime": 420, "endTime": 420},
{"vehicle": {"length": 5.0, "width": 2.0, "maxPosAcc": 2.0, "maxNegAcc": 4.5, "usualPosAcc": 2.0, "usualNegAcc": 4.5, "minGap": 2.5, "maxSpeed": 11.111, "headwayTime": 2}, "route": ["road_0_12_0", "road_1_12_1", "road_1_13_0", "road_2_13_3", "road_2_12_3", "road_2_11_3", "road_2_10_3", "road_2_9_3", "road_2_8_3", "road_2_7_3", "road_2_6_3", "road_2_5_0", "road_3_5_0"], "interval": 1.0, "startTime": 420, "endTime": 420},
{"vehicle": {"length": 5.0, "width": 2.0, "maxPosAcc": 2.0, "maxNegAcc": 4.5, "usualPosAcc": 2.0, "usualNegAcc": 4.5, "minGap": 2.5, "maxSpeed": 11.111, "headwayTime": 2}, "route": ["road_0_10_0", "road_1_10_1", "road_1_11_1", "road_1_12_1", "road_1_13_1", "road_1_14_1", "road_1_15_0", "road_2_15_0", "road_3_15_1", "road_3_16_1"], "interval": 1.0, "startTime": 420, "endTime": 420},
{"vehicle": {"length": 5.0, "width": 2.0, "maxPosAcc": 2.0, "maxNegAcc": 4.5, "usualPosAcc": 2.0, "usualNegAcc": 4.5, "minGap": 2.5, "maxSpeed": 11.111, "headwayTime": 2}, "route": ["road_1_17_3", "road_1_16_0", "road_2_16_3", "road_2_15_3", "road_2_14_3", "road_2_13_3", "road_2_12_3", "road_2_11_3", "road_2_10_3", "road_2_9_0", "road_3_9_0"], "interval": 1.0, "startTime": 420, "endTime": 420},
{"vehicle": {"length": 5.0, "width": 2.0, "maxPosAcc": 2.0, "maxNegAcc": 4.5, "usualPosAcc": 2.0, "usualNegAcc": 4.5, "minGap": 2.5, "maxSpeed": 11.111, "headwayTime": 2}, "route": ["road_0_5_0", "road_1_5_0", "road_2_5_0", "road_3_5_1", "road_3_6_1", "road_3_7_1", "road_3_8_1", "road_3_9_1", "road_3_10_0"], "interval": 1.0, "startTime": 420, "endTime": 420},
{"vehicle": {"length": 5.0, "width": 2.0, "maxPosAcc": 2.0, "maxNegAcc": 4.5, "usualPosAcc": 2.0, "usualNegAcc": 4.5, "minGap": 2.5, "maxSpeed": 11.111, "headwayTime": 2}, "route": ["road_4_2_2", "road_3_2_1", "road_3_3_0"], "interval": 1.0, "startTime": 420, "endTime": 420},
{"vehicle": {"length": 5.0, "width": 2.0, "maxPosAcc": 2.0, "maxNegAcc": 4.5, "usualPosAcc": 2.0, "usualNegAcc": 4.5, "minGap": 2.5, "maxSpeed": 11.111, "headwayTime": 2}, "route": ["road_4_15_2", "road_3_15_1", "road_3_16_2", "road_2_16_3", "road_2_15_3", "road_2_14_3", "road_2_13_3", "road_2_12_3", "road_2_11_3", "road_2_10_3", "road_2_9_3", "road_2_8_3", "road_2_7_0", "road_3_7_0"], "interval": 1.0, "startTime": 421, "endTime": 421},
{"vehicle": {"length": 5.0, "width": 2.0, "maxPosAcc": 2.0, "maxNegAcc": 4.5, "usualPosAcc": 2.0, "usualNegAcc": 4.5, "minGap": 2.5, "maxSpeed": 11.111, "headwayTime": 2}, "route": ["road_3_17_3", "road_3_16_2", "road_2_16_3", "road_2_15_3", "road_2_14_3", "road_2_13_3", "road_2_12_3", "road_2_11_3", "road_2_10_3", "road_2_9_3", "road_2_8_3", "road_2_7_3", "road_2_6_3", "road_2_5_3", "road_2_4_3", "road_2_3_3", "road_2_2_3", "road_2_1_0", "road_3_1_3"], "interval": 1.0, "startTime": 421, "endTime": 421},
{"vehicle": {"length": 5.0, "width": 2.0, "maxPosAcc": 2.0, "maxNegAcc": 4.5, "usualPosAcc": 2.0, "usualNegAcc": 4.5, "minGap": 2.5, "maxSpeed": 11.111, "headwayTime": 2}, "route": ["road_4_10_2", "road_3_10_2", "road_2_10_3", "road_2_9_3", "road_2_8_3", "road_2_7_3", "road_2_6_3", "road_2_5_3", "road_2_4_3", "road_2_3_3", "road_2_2_3", "road_2_1_0", "road_3_1_3"], "interval": 1.0, "startTime": 423, "endTime": 423},
{"vehicle": {"length": 5.0, "width": 2.0, "maxPosAcc": 2.0, "maxNegAcc": 4.5, "usualPosAcc": 2.0, "usualNegAcc": 4.5, "minGap": 2.5, "maxSpeed": 11.111, "headwayTime": 2}, "route": ["road_4_8_2", "road_3_8_2", "road_2_8_3", "road_2_7_3", "road_2_6_3", "road_2_5_3", "road_2_4_3", "road_2_3_3", "road_2_2_3", "road_2_1_2", "road_1_1_3"], "interval": 1.0, "startTime": 424, "endTime": 424},
{"vehicle": {"length": 5.0, "width": 2.0, "maxPosAcc": 2.0, "maxNegAcc": 4.5, "usualPosAcc": 2.0, "usualNegAcc": 4.5, "minGap": 2.5, "maxSpeed": 11.111, "headwayTime": 2}, "route": ["road_3_0_1", "road_3_1_1", "road_3_2_1", "road_3_3_1", "road_3_4_0"], "interval": 1.0, "startTime": 424, "endTime": 424},
{"vehicle": {"length": 5.0, "width": 2.0, "maxPosAcc": 2.0, "maxNegAcc": 4.5, "usualPosAcc": 2.0, "usualNegAcc": 4.5, "minGap": 2.5, "maxSpeed": 11.111, "headwayTime": 2}, "route": ["road_1_17_3", "road_1_16_0", "road_2_16_1"], "interval": 1.0, "startTime": 425, "endTime": 425},
{"vehicle": {"length": 5.0, "width": 2.0, "maxPosAcc": 2.0, "maxNegAcc": 4.5, "usualPosAcc": 2.0, "usualNegAcc": 4.5, "minGap": 2.5, "maxSpeed": 11.111, "headwayTime": 2}, "route": ["road_3_0_1", "road_3_1_1", "road_3_2_1", "road_3_3_1", "road_3_4_1", "road_3_5_1", "road_3_6_1", "road_3_7_1", "road_3_8_0"], "interval": 1.0, "startTime": 435, "endTime": 435},
{"vehicle": {"length": 5.0, "width": 2.0, "maxPosAcc": 2.0, "maxNegAcc": 4.5, "usualPosAcc": 2.0, "usualNegAcc": 4.5, "minGap": 2.5, "maxSpeed": 11.111, "headwayTime": 2}, "route": ["road_4_13_2", "road_3_13_1", "road_3_14_1", "road_3_15_1", "road_3_16_2", "road_2_16_1"], "interval": 1.0, "startTime": 439, "endTime": 439},
{"vehicle": {"length": 5.0, "width": 2.0, "maxPosAcc": 2.0, "maxNegAcc": 4.5, "usualPosAcc": 2.0, "usualNegAcc": 4.5, "minGap": 2.5, "maxSpeed": 11.111, "headwayTime": 2}, "route": ["road_3_17_3", "road_3_16_2", "road_2_16_3", "road_2_15_3", "road_2_14_3", "road_2_13_3", "road_2_12_3", "road_2_11_3", "road_2_10_3", "road_2_9_3", "road_2_8_3", "road_2_7_3", "road_2_6_3", "road_2_5_3", "road_2_4_3", "road_2_3_3", "road_2_2_3", "road_2_1_0", "road_3_1_3"], "interval": 1.0, "startTime": 441, "endTime": 441},
{"vehicle": {"length": 5.0, "width": 2.0, "maxPosAcc": 2.0, "maxNegAcc": 4.5, "usualPosAcc": 2.0, "usualNegAcc": 4.5, "minGap": 2.5, "maxSpeed": 11.111, "headwayTime": 2}, "route": ["road_4_9_2", "road_3_9_1", "road_3_10_2", "road_2_10_3", "road_2_9_3", "road_2_8_3", "road_2_7_3", "road_2_6_3", "road_2_5_3", "road_2_4_3", "road_2_3_3", "road_2_2_3", "road_2_1_0", "road_3_1_3"], "interval": 1.0, "startTime": 442, "endTime": 442},
{"vehicle": {"length": 5.0, "width": 2.0, "maxPosAcc": 2.0, "maxNegAcc": 4.5, "usualPosAcc": 2.0, "usualNegAcc": 4.5, "minGap": 2.5, "maxSpeed": 11.111, "headwayTime": 2}, "route": ["road_4_13_2", "road_3_13_1", "road_3_14_1", "road_3_15_1", "road_3_16_2", "road_2_16_1"], "interval": 1.0, "startTime": 443, "endTime": 443},
{"vehicle": {"length": 5.0, "width": 2.0, "maxPosAcc": 2.0, "maxNegAcc": 4.5, "usualPosAcc": 2.0, "usualNegAcc": 4.5, "minGap": 2.5, "maxSpeed": 11.111, "headwayTime": 2}, "route": ["road_4_6_2", "road_3_6_2", "road_2_6_3", "road_2_5_3", "road_2_4_3", "road_2_3_0", "road_3_3_1", "road_3_4_0"], "interval": 1.0, "startTime": 444, "endTime": 444},
{"vehicle": {"length": 5.0, "width": 2.0, "maxPosAcc": 2.0, "maxNegAcc": 4.5, "usualPosAcc": 2.0, "usualNegAcc": 4.5, "minGap": 2.5, "maxSpeed": 11.111, "headwayTime": 2}, "route": ["road_0_2_0", "road_1_2_1", "road_1_3_0", "road_2_3_3", "road_2_2_3", "road_2_1_0", "road_3_1_1", "road_3_2_0"], "interval": 1.0, "startTime": 444, "endTime": 444},
{"vehicle": {"length": 5.0, "width": 2.0, "maxPosAcc": 2.0, "maxNegAcc": 4.5, "usualPosAcc": 2.0, "usualNegAcc": 4.5, "minGap": 2.5, "maxSpeed": 11.111, "headwayTime": 2}, "route": ["road_4_15_2", "road_3_15_1", "road_3_16_2", "road_2_16_1"], "interval": 1.0, "startTime": 445, "endTime": 445},
{"vehicle": {"length": 5.0, "width": 2.0, "maxPosAcc": 2.0, "maxNegAcc": 4.5, "usualPosAcc": 2.0, "usualNegAcc": 4.5, "minGap": 2.5, "maxSpeed": 11.111, "headwayTime": 2}, "route": ["road_4_15_2", "road_3_15_1", "road_3_16_2", "road_2_16_3", "road_2_15_3", "road_2_14_3", "road_2_13_3", "road_2_12_3", "road_2_11_3", "road_2_10_3", "road_2_9_3", "road_2_8_3", "road_2_7_3", "road_2_6_3", "road_2_5_3", "road_2_4_3", "road_2_3_0", "road_3_3_0"], "interval": 1.0, "startTime": 449, "endTime": 449},
{"vehicle": {"length": 5.0, "width": 2.0, "maxPosAcc": 2.0, "maxNegAcc": 4.5, "usualPosAcc": 2.0, "usualNegAcc": 4.5, "minGap": 2.5, "maxSpeed": 11.111, "headwayTime": 2}, "route": ["road_4_9_2", "road_3_9_1", "road_3_10_2", "road_2_10_3", "road_2_9_3", "road_2_8_3", "road_2_7_3", "road_2_6_3", "road_2_5_0", "road_3_5_1", "road_3_6_0"], "interval": 1.0, "startTime": 449, "endTime": 449},
{"vehicle": {"length": 5.0, "width": 2.0, "maxPosAcc": 2.0, "maxNegAcc": 4.5, "usualPosAcc": 2.0, "usualNegAcc": 4.5, "minGap": 2.5, "maxSpeed": 11.111, "headwayTime": 2}, "route": ["road_2_17_3", "road_2_16_2", "road_1_16_1"], "interval": 1.0, "startTime": 449, "endTime": 449},
{"vehicle": {"length": 5.0, "width": 2.0, "maxPosAcc": 2.0, "maxNegAcc": 4.5, "usualPosAcc": 2.0, "usualNegAcc": 4.5, "minGap": 2.5, "maxSpeed": 11.111, "headwayTime": 2}, "route": ["road_0_8_0", "road_1_8_1", "road_1_9_0", "road_2_9_3", "road_2_8_3", "road_2_7_0", "road_3_7_0"], "interval": 1.0, "startTime": 454, "endTime": 454},
{"vehicle": {"length": 5.0, "width": 2.0, "maxPosAcc": 2.0, "maxNegAcc": 4.5, "usualPosAcc": 2.0, "usualNegAcc": 4.5, "minGap": 2.5, "maxSpeed": 11.111, "headwayTime": 2}, "route": ["road_3_0_1", "road_3_1_1", "road_3_2_1", "road_3_3_1", "road_3_4_0"], "interval": 1.0, "startTime": 455, "endTime": 455},
{"vehicle": {"length": 5.0, "width": 2.0, "maxPosAcc": 2.0, "maxNegAcc": 4.5, "usualPosAcc": 2.0, "usualNegAcc": 4.5, "minGap": 2.5, "maxSpeed": 11.111, "headwayTime": 2}, "route": ["road_4_6_2", "road_3_6_1", "road_3_7_1", "road_3_8_1", "road_3_9_1", "road_3_10_1", "road_3_11_1", "road_3_12_0"], "interval": 1.0, "startTime": 458, "endTime": 458},
{"vehicle": {"length": 5.0, "width": 2.0, "maxPosAcc": 2.0, "maxNegAcc": 4.5, "usualPosAcc": 2.0, "usualNegAcc": 4.5, "minGap": 2.5, "maxSpeed": 11.111, "headwayTime": 2}, "route": ["road_4_2_2", "road_3_2_1", "road_3_3_1", "road_3_4_1", "road_3_5_1", "road_3_6_1", "road_3_7_1", "road_3_8_1", "road_3_9_1", "road_3_10_1", "road_3_11_1", "road_3_12_1", "road_3_13_1", "road_3_14_1", "road_3_15_1", "road_3_16_1"], "interval": 1.0, "startTime": 459, "endTime": 459},
{"vehicle": {"length": 5.0, "width": 2.0, "maxPosAcc": 2.0, "maxNegAcc": 4.5, "usualPosAcc": 2.0, "usualNegAcc": 4.5, "minGap": 2.5, "maxSpeed": 11.111, "headwayTime": 2}, "route": ["road_2_0_1", "road_2_1_2", "road_1_1_1", "road_1_2_1", "road_1_3_1", "road_1_4_1", "road_1_5_1", "road_1_6_1", "road_1_7_1", "road_1_8_1", "road_1_9_1", "road_1_10_1", "road_1_11_1", "road_1_12_1", "road_1_13_1", "road_1_14_1", "road_1_15_1", "road_1_16_1"], "interval": 1.0, "startTime": 461, "endTime": 461},
{"vehicle": {"length": 5.0, "width": 2.0, "maxPosAcc": 2.0, "maxNegAcc": 4.5, "usualPosAcc": 2.0, "usualNegAcc": 4.5, "minGap": 2.5, "maxSpeed": 11.111, "headwayTime": 2}, "route": ["road_0_13_0", "road_1_13_1", "road_1_14_1", "road_1_15_0", "road_2_15_0", "road_3_15_0"], "interval": 1.0, "startTime": 462, "endTime": 462},
{"vehicle": {"length": 5.0, "width": 2.0, "maxPosAcc": 2.0, "maxNegAcc": 4.5, "usualPosAcc": 2.0, "usualNegAcc": 4.5, "minGap": 2.5, "maxSpeed": 11.111, "headwayTime": 2}, "route": ["road_4_3_2", "road_3_3_1", "road_3_4_2", "road_2_4_3", "road_2_3_3", "road_2_2_3", "road_2_1_3"], "interval": 1.0, "startTime": 465, "endTime": 465},
{"vehicle": {"length": 5.0, "width": 2.0, "maxPosAcc": 2.0, "maxNegAcc": 4.5, "usualPosAcc": 2.0, "usualNegAcc": 4.5, "minGap": 2.5, "maxSpeed": 11.111, "headwayTime": 2}, "route": ["road_4_3_2", "road_3_3_1", "road_3_4_1", "road_3_5_1", "road_3_6_1", "road_3_7_1", "road_3_8_0"], "interval": 1.0, "startTime": 468, "endTime": 468},
{"vehicle": {"length": 5.0, "width": 2.0, "maxPosAcc": 2.0, "maxNegAcc": 4.5, "usualPosAcc": 2.0, "usualNegAcc": 4.5, "minGap": 2.5, "maxSpeed": 11.111, "headwayTime": 2}, "route": ["road_1_17_3", "road_1_16_0", "road_2_16_3", "road_2_15_3", "road_2_14_3", "road_2_13_3", "road_2_12_3", "road_2_11_3", "road_2_10_3", "road_2_9_3", "road_2_8_2", "road_1_8_1", "road_1_9_2"], "interval": 1.0, "startTime": 468, "endTime": 468},
{"vehicle": {"length": 5.0, "width": 2.0, "maxPosAcc": 2.0, "maxNegAcc": 4.5, "usualPosAcc": 2.0, "usualNegAcc": 4.5, "minGap": 2.5, "maxSpeed": 11.111, "headwayTime": 2}, "route": ["road_4_13_2", "road_3_13_1", "road_3_14_1", "road_3_15_0"], "interval": 1.0, "startTime": 469, "endTime": 469},
{"vehicle": {"length": 5.0, "width": 2.0, "maxPosAcc": 2.0, "maxNegAcc": 4.5, "usualPosAcc": 2.0, "usualNegAcc": 4.5, "minGap": 2.5, "maxSpeed": 11.111, "headwayTime": 2}, "route": ["road_3_0_1", "road_3_1_1", "road_3_2_1", "road_3_3_1", "road_3_4_1", "road_3_5_1", "road_3_6_1", "road_3_7_1", "road_3_8_1", "road_3_9_1", "road_3_10_1", "road_3_11_1", "road_3_12_0"], "interval": 1.0, "startTime": 470, "endTime": 470},
{"vehicle": {"length": 5.0, "width": 2.0, "maxPosAcc": 2.0, "maxNegAcc": 4.5, "usualPosAcc": 2.0, "usualNegAcc": 4.5, "minGap": 2.5, "maxSpeed": 11.111, "headwayTime": 2}, "route": ["road_2_0_1", "road_2_1_0", "road_3_1_1", "road_3_2_1", "road_3_3_1", "road_3_4_1", "road_3_5_1", "road_3_6_1", "road_3_7_1", "road_3_8_1", "road_3_9_1", "road_3_10_1", "road_3_11_1", "road_3_12_1", "road_3_13_0"], "interval": 1.0, "startTime": 471, "endTime": 471},
{"vehicle": {"length": 5.0, "width": 2.0, "maxPosAcc": 2.0, "maxNegAcc": 4.5, "usualPosAcc": 2.0, "usualNegAcc": 4.5, "minGap": 2.5, "maxSpeed": 11.111, "headwayTime": 2}, "route": ["road_4_13_2", "road_3_13_1", "road_3_14_2", "road_2_14_3", "road_2_13_3", "road_2_12_3", "road_2_11_3", "road_2_10_3", "road_2_9_3", "road_2_8_3", "road_2_7_3", "road_2_6_3", "road_2_5_0", "road_3_5_1", "road_3_6_0"], "interval": 1.0, "startTime": 475, "endTime": 475},
{"vehicle": {"length": 5.0, "width": 2.0, "maxPosAcc": 2.0, "maxNegAcc": 4.5, "usualPosAcc": 2.0, "usualNegAcc": 4.5, "minGap": 2.5, "maxSpeed": 11.111, "headwayTime": 2}, "route": ["road_2_17_3", "road_2_16_2", "road_1_16_1"], "interval": 1.0, "startTime": 475, "endTime": 475},
{"vehicle": {"length": 5.0, "width": 2.0, "maxPosAcc": 2.0, "maxNegAcc": 4.5, "usualPosAcc": 2.0, "usualNegAcc": 4.5, "minGap": 2.5, "maxSpeed": 11.111, "headwayTime": 2}, "route": ["road_3_0_1", "road_3_1_1", "road_3_2_1", "road_3_3_1", "road_3_4_1", "road_3_5_1", "road_3_6_1", "road_3_7_1", "road_3_8_1", "road_3_9_1", "road_3_10_0"], "interval": 1.0, "startTime": 477, "endTime": 477},
{"vehicle": {"length": 5.0, "width": 2.0, "maxPosAcc": 2.0, "maxNegAcc": 4.5, "usualPosAcc": 2.0, "usualNegAcc": 4.5, "minGap": 2.5, "maxSpeed": 11.111, "headwayTime": 2}, "route": ["road_2_17_3", "road_2_16_3", "road_2_15_3", "road_2_14_3", "road_2_13_3", "road_2_12_3", "road_2_11_3", "road_2_10_3", "road_2_9_3", "road_2_8_3", "road_2_7_3", "road_2_6_3", "road_2_5_3", "road_2_4_3", "road_2_3_3", "road_2_2_3", "road_2_1_0", "road_3_1_3"], "interval": 1.0, "startTime": 479, "endTime": 479},
{"vehicle": {"length": 5.0, "width": 2.0, "maxPosAcc": 2.0, "maxNegAcc": 4.5, "usualPosAcc": 2.0, "usualNegAcc": 4.5, "minGap": 2.5, "maxSpeed": 11.111, "headwayTime": 2}, "route": ["road_4_15_2", "road_3_15_1", "road_3_16_2", "road_2_16_1"], "interval": 1.0, "startTime": 480, "endTime": 480},
{"vehicle": {"length": 5.0, "width": 2.0, "maxPosAcc": 2.0, "maxNegAcc": 4.5, "usualPosAcc": 2.0, "usualNegAcc": 4.5, "minGap": 2.5, "maxSpeed": 11.111, "headwayTime": 2}, "route": ["road_4_4_2", "road_3_4_1", "road_3_5_1", "road_3_6_1", "road_3_7_1", "road_3_8_1", "road_3_9_1", "road_3_10_1", "road_3_11_1", "road_3_12_1", "road_3_13_0"], "interval": 1.0, "startTime": 480, "endTime": 480},
{"vehicle": {"length": 5.0, "width": 2.0, "maxPosAcc": 2.0, "maxNegAcc": 4.5, "usualPosAcc": 2.0, "usualNegAcc": 4.5, "minGap": 2.5, "maxSpeed": 11.111, "headwayTime": 2}, "route": ["road_3_0_1", "road_3_1_1", "road_3_2_1", "road_3_3_1", "road_3_4_1", "road_3_5_1", "road_3_6_1", "road_3_7_1", "road_3_8_1", "road_3_9_1", "road_3_10_1", "road_3_11_1", "road_3_12_1", "road_3_13_1", "road_3_14_1", "road_3_15_1", "road_3_16_1"], "interval": 1.0, "startTime": 480, "endTime": 480},
{"vehicle": {"length": 5.0, "width": 2.0, "maxPosAcc": 2.0, "maxNegAcc": 4.5, "usualPosAcc": 2.0, "usualNegAcc": 4.5, "minGap": 2.5, "maxSpeed": 11.111, "headwayTime": 2}, "route": ["road_4_5_2", "road_3_5_1", "road_3_6_1", "road_3_7_1", "road_3_8_1", "road_3_9_1", "road_3_10_1", "road_3_11_1", "road_3_12_1", "road_3_13_1", "road_3_14_1", "road_3_15_1", "road_3_16_1"], "interval": 1.0, "startTime": 480, "endTime": 480},
{"vehicle": {"length": 5.0, "width": 2.0, "maxPosAcc": 2.0, "maxNegAcc": 4.5, "usualPosAcc": 2.0, "usualNegAcc": 4.5, "minGap": 2.5, "maxSpeed": 11.111, "headwayTime": 2}, "route": ["road_4_6_2", "road_3_6_2", "road_2_6_3", "road_2_5_3", "road_2_4_3", "road_2_3_3", "road_2_2_2", "road_1_2_1", "road_1_3_2"], "interval": 1.0, "startTime": 480, "endTime": 480},
{"vehicle": {"length": 5.0, "width": 2.0, "maxPosAcc": 2.0, "maxNegAcc": 4.5, "usualPosAcc": 2.0, "usualNegAcc": 4.5, "minGap": 2.5, "maxSpeed": 11.111, "headwayTime": 2}, "route": ["road_4_7_2", "road_3_7_1", "road_3_8_2", "road_2_8_3", "road_2_7_3", "road_2_6_3", "road_2_5_3", "road_2_4_3", "road_2_3_3", "road_2_2_3", "road_2_1_3"], "interval": 1.0, "startTime": 480, "endTime": 480},
{"vehicle": {"length": 5.0, "width": 2.0, "maxPosAcc": 2.0, "maxNegAcc": 4.5, "usualPosAcc": 2.0, "usualNegAcc": 4.5, "minGap": 2.5, "maxSpeed": 11.111, "headwayTime": 2}, "route": ["road_4_9_2", "road_3_9_1", "road_3_10_2", "road_2_10_3", "road_2_9_3", "road_2_8_3", "road_2_7_3", "road_2_6_3", "road_2_5_0", "road_3_5_0"], "interval": 1.0, "startTime": 480, "endTime": 480},
{"vehicle": {"length": 5.0, "width": 2.0, "maxPosAcc": 2.0, "maxNegAcc": 4.5, "usualPosAcc": 2.0, "usualNegAcc": 4.5, "minGap": 2.5, "maxSpeed": 11.111, "headwayTime": 2}, "route": ["road_4_10_2", "road_3_10_1", "road_3_11_1", "road_3_12_1", "road_3_13_0"], "interval": 1.0, "startTime": 480, "endTime": 480},
{"vehicle": {"length": 5.0, "width": 2.0, "maxPosAcc": 2.0, "maxNegAcc": 4.5, "usualPosAcc": 2.0, "usualNegAcc": 4.5, "minGap": 2.5, "maxSpeed": 11.111, "headwayTime": 2}, "route": ["road_4_12_2", "road_3_12_1", "road_3_13_1", "road_3_14_1", "road_3_15_1", "road_3_16_1"], "interval": 1.0, "startTime": 480, "endTime": 480},
{"vehicle": {"length": 5.0, "width": 2.0, "maxPosAcc": 2.0, "maxNegAcc": 4.5, "usualPosAcc": 2.0, "usualNegAcc": 4.5, "minGap": 2.5, "maxSpeed": 11.111, "headwayTime": 2}, "route": ["road_4_13_2", "road_3_13_1", "road_3_14_2", "road_2_14_3", "road_2_13_3", "road_2_12_3", "road_2_11_3", "road_2_10_3", "road_2_9_3", "road_2_8_3", "road_2_7_3", "road_2_6_3", "road_2_5_3", "road_2_4_3", "road_2_3_3", "road_2_2_2", "road_1_2_2"], "interval": 1.0, "startTime": 480, "endTime": 480},
{"vehicle": {"length": 5.0, "width": 2.0, "maxPosAcc": 2.0, "maxNegAcc": 4.5, "usualPosAcc": 2.0, "usualNegAcc": 4.5, "minGap": 2.5, "maxSpeed": 11.111, "headwayTime": 2}, "route": ["road_4_14_2", "road_3_14_2", "road_2_14_3", "road_2_13_3", "road_2_12_3", "road_2_11_3", "road_2_10_3", "road_2_9_3", "road_2_8_3", "road_2_7_3", "road_2_6_3", "road_2_5_0", "road_3_5_0"], "interval": 1.0, "startTime": 480, "endTime": 480},
{"vehicle": {"length": 5.0, "width": 2.0, "maxPosAcc": 2.0, "maxNegAcc": 4.5, "usualPosAcc": 2.0, "usualNegAcc": 4.5, "minGap": 2.5, "maxSpeed": 11.111, "headwayTime": 2}, "route": ["road_3_17_3", "road_3_16_2", "road_2_16_3", "road_2_15_3", "road_2_14_3", "road_2_13_3", "road_2_12_3", "road_2_11_3", "road_2_10_3", "road_2_9_3", "road_2_8_3", "road_2_7_3", "road_2_6_3", "road_2_5_3", "road_2_4_3", "road_2_3_0", "road_3_3_0"], "interval": 1.0, "startTime": 480, "endTime": 480},
{"vehicle": {"length": 5.0, "width": 2.0, "maxPosAcc": 2.0, "maxNegAcc": 4.5, "usualPosAcc": 2.0, "usualNegAcc": 4.5, "minGap": 2.5, "maxSpeed": 11.111, "headwayTime": 2}, "route": ["road_2_0_1", "road_2_1_0", "road_3_1_1", "road_3_2_1", "road_3_3_1", "road_3_4_1", "road_3_5_1", "road_3_6_1", "road_3_7_0"], "interval": 1.0, "startTime": 480, "endTime": 480},
{"vehicle": {"length": 5.0, "width": 2.0, "maxPosAcc": 2.0, "maxNegAcc": 4.5, "usualPosAcc": 2.0, "usualNegAcc": 4.5, "minGap": 2.5, "maxSpeed": 11.111, "headwayTime": 2}, "route": ["road_0_9_0", "road_1_9_0", "road_2_9_3", "road_2_8_3", "road_2_7_0", "road_3_7_1", "road_3_8_0"], "interval": 1.0, "startTime": 480, "endTime": 480},
{"vehicle": {"length": 5.0, "width": 2.0, "maxPosAcc": 2.0, "maxNegAcc": 4.5, "usualPosAcc": 2.0, "usualNegAcc": 4.5, "minGap": 2.5, "maxSpeed": 11.111, "headwayTime": 2}, "route": ["road_2_17_3", "road_2_16_3", "road_2_15_3", "road_2_14_3", "road_2_13_3", "road_2_12_3", "road_2_11_3", "road_2_10_2", "road_1_10_2"], "interval": 1.0, "startTime": 480, "endTime": 480},
{"vehicle": {"length": 5.0, "width": 2.0, "maxPosAcc": 2.0, "maxNegAcc": 4.5, "usualPosAcc": 2.0, "usualNegAcc": 4.5, "minGap": 2.5, "maxSpeed": 11.111, "headwayTime": 2}, "route": ["road_1_17_3", "road_1_16_0", "road_2_16_3", "road_2_15_0", "road_3_15_0"], "interval": 1.0, "startTime": 480, "endTime": 480},
{"vehicle": {"length": 5.0, "width": 2.0, "maxPosAcc": 2.0, "maxNegAcc": 4.5, "usualPosAcc": 2.0, "usualNegAcc": 4.5, "minGap": 2.5, "maxSpeed": 11.111, "headwayTime": 2}, "route": ["road_4_2_2", "road_3_2_1", "road_3_3_1", "road_3_4_1", "road_3_5_1", "road_3_6_1", "road_3_7_1", "road_3_8_1", "road_3_9_0"], "interval": 1.0, "startTime": 480, "endTime": 480},
{"vehicle": {"length": 5.0, "width": 2.0, "maxPosAcc": 2.0, "maxNegAcc": 4.5, "usualPosAcc": 2.0, "usualNegAcc": 4.5, "minGap": 2.5, "maxSpeed": 11.111, "headwayTime": 2}, "route": ["road_3_0_1", "road_3_1_1", "road_3_2_1", "road_3_3_1", "road_3_4_1", "road_3_5_1", "road_3_6_1", "road_3_7_1", "road_3_8_1", "road_3_9_1", "road_3_10_1", "road_3_11_0"], "interval": 1.0, "startTime": 481, "endTime": 481},
{"vehicle": {"length": 5.0, "width": 2.0, "maxPosAcc": 2.0, "maxNegAcc": 4.5, "usualPosAcc": 2.0, "usualNegAcc": 4.5, "minGap": 2.5, "maxSpeed": 11.111, "headwayTime": 2}, "route": ["road_0_11_0", "road_1_11_0", "road_2_11_3", "road_2_10_3", "road_2_9_3", "road_2_8_3", "road_2_7_0", "road_3_7_1", "road_3_8_0"], "interval": 1.0, "startTime": 482, "endTime": 482},
{"vehicle": {"length": 5.0, "width": 2.0, "maxPosAcc": 2.0, "maxNegAcc": 4.5, "usualPosAcc": 2.0, "usualNegAcc": 4.5, "minGap": 2.5, "maxSpeed": 11.111, "headwayTime": 2}, "route": ["road_4_4_2", "road_3_4_1", "road_3_5_1", "road_3_6_2", "road_2_6_2", "road_1_6_2"], "interval": 1.0, "startTime": 489, "endTime": 489},
{"vehicle": {"length": 5.0, "width": 2.0, "maxPosAcc": 2.0, "maxNegAcc": 4.5, "usualPosAcc": 2.0, "usualNegAcc": 4.5, "minGap": 2.5, "maxSpeed": 11.111, "headwayTime": 2}, "route": ["road_4_10_2", "road_3_10_1", "road_3_11_1", "road_3_12_1", "road_3_13_1", "road_3_14_1", "road_3_15_1", "road_3_16_2", "road_2_16_1"], "interval": 1.0, "startTime": 491, "endTime": 491},
{"vehicle": {"length": 5.0, "width": 2.0, "maxPosAcc": 2.0, "maxNegAcc": 4.5, "usualPosAcc": 2.0, "usualNegAcc": 4.5, "minGap": 2.5, "maxSpeed": 11.111, "headwayTime": 2}, "route": ["road_4_8_2", "road_3_8_2", "road_2_8_3", "road_2_7_3", "road_2_6_3", "road_2_5_3", "road_2_4_3", "road_2_3_3", "road_2_2_3", "road_2_1_3"], "interval": 1.0, "startTime": 495, "endTime": 495},
{"vehicle": {"length": 5.0, "width": 2.0, "maxPosAcc": 2.0, "maxNegAcc": 4.5, "usualPosAcc": 2.0, "usualNegAcc": 4.5, "minGap": 2.5, "maxSpeed": 11.111, "headwayTime": 2}, "route": ["road_3_17_3", "road_3_16_2", "road_2_16_3", "road_2_15_3", "road_2_14_3", "road_2_13_3", "road_2_12_3", "road_2_11_3", "road_2_10_3", "road_2_9_3", "road_2_8_3", "road_2_7_3", "road_2_6_3", "road_2_5_3", "road_2_4_3", "road_2_3_3", "road_2_2_3", "road_2_1_0", "road_3_1_3"], "interval": 1.0, "startTime": 496, "endTime": 496},
{"vehicle": {"length": 5.0, "width": 2.0, "maxPosAcc": 2.0, "maxNegAcc": 4.5, "usualPosAcc": 2.0, "usualNegAcc": 4.5, "minGap": 2.5, "maxSpeed": 11.111, "headwayTime": 2}, "route": ["road_4_4_2", "road_3_4_1", "road_3_5_1", "road_3_6_0"], "interval": 1.0, "startTime": 497, "endTime": 497},
{"vehicle": {"length": 5.0, "width": 2.0, "maxPosAcc": 2.0, "maxNegAcc": 4.5, "usualPosAcc": 2.0, "usualNegAcc": 4.5, "minGap": 2.5, "maxSpeed": 11.111, "headwayTime": 2}, "route": ["road_2_17_3", "road_2_16_3", "road_2_15_3", "road_2_14_3", "road_2_13_3", "road_2_12_3", "road_2_11_3", "road_2_10_3", "road_2_9_3", "road_2_8_3", "road_2_7_3", "road_2_6_3", "road_2_5_3", "road_2_4_3", "road_2_3_3", "road_2_2_3", "road_2_1_0", "road_3_1_1", "road_3_2_0"], "interval": 1.0, "startTime": 499, "endTime": 499},
{"vehicle": {"length": 5.0, "width": 2.0, "maxPosAcc": 2.0, "maxNegAcc": 4.5, "usualPosAcc": 2.0, "usualNegAcc": 4.5, "minGap": 2.5, "maxSpeed": 11.111, "headwayTime": 2}, "route": ["road_2_17_3", "road_2_16_3", "road_2_15_3", "road_2_14_3", "road_2_13_3", "road_2_12_3", "road_2_11_3", "road_2_10_3", "road_2_9_3", "road_2_8_3", "road_2_7_3", "road_2_6_3", "road_2_5_3", "road_2_4_3", "road_2_3_3", "road_2_2_3", "road_2_1_0", "road_3_1_1", "road_3_2_0"], "interval": 1.0, "startTime": 500, "endTime": 500},
{"vehicle": {"length": 5.0, "width": 2.0, "maxPosAcc": 2.0, "maxNegAcc": 4.5, "usualPosAcc": 2.0, "usualNegAcc": 4.5, "minGap": 2.5, "maxSpeed": 11.111, "headwayTime": 2}, "route": ["road_4_13_2", "road_3_13_1", "road_3_14_2", "road_2_14_2", "road_1_14_2"], "interval": 1.0, "startTime": 502, "endTime": 502},
{"vehicle": {"length": 5.0, "width": 2.0, "maxPosAcc": 2.0, "maxNegAcc": 4.5, "usualPosAcc": 2.0, "usualNegAcc": 4.5, "minGap": 2.5, "maxSpeed": 11.111, "headwayTime": 2}, "route": ["road_4_4_2", "road_3_4_2", "road_2_4_2", "road_1_4_2"], "interval": 1.0, "startTime": 508, "endTime": 508},
{"vehicle": {"length": 5.0, "width": 2.0, "maxPosAcc": 2.0, "maxNegAcc": 4.5, "usualPosAcc": 2.0, "usualNegAcc": 4.5, "minGap": 2.5, "maxSpeed": 11.111, "headwayTime": 2}, "route": ["road_2_0_1", "road_2_1_0", "road_3_1_1", "road_3_2_1", "road_3_3_0"], "interval": 1.0, "startTime": 510, "endTime": 510},
{"vehicle": {"length": 5.0, "width": 2.0, "maxPosAcc": 2.0, "maxNegAcc": 4.5, "usualPosAcc": 2.0, "usualNegAcc": 4.5, "minGap": 2.5, "maxSpeed": 11.111, "headwayTime": 2}, "route": ["road_4_4_2", "road_3_4_1", "road_3_5_1", "road_3_6_2", "road_2_6_2", "road_1_6_2"], "interval": 1.0, "startTime": 513, "endTime": 513},
{"vehicle": {"length": 5.0, "width": 2.0, "maxPosAcc": 2.0, "maxNegAcc": 4.5, "usualPosAcc": 2.0, "usualNegAcc": 4.5, "minGap": 2.5, "maxSpeed": 11.111, "headwayTime": 2}, "route": ["road_2_0_1", "road_2_1_0", "road_3_1_3"], "interval": 1.0, "startTime": 513, "endTime": 513},
{"vehicle": {"length": 5.0, "width": 2.0, "maxPosAcc": 2.0, "maxNegAcc": 4.5, "usualPosAcc": 2.0, "usualNegAcc": 4.5, "minGap": 2.5, "maxSpeed": 11.111, "headwayTime": 2}, "route": ["road_4_9_2", "road_3_9_1", "road_3_10_2", "road_2_10_3", "road_2_9_3", "road_2_8_3", "road_2_7_3", "road_2_6_3", "road_2_5_0", "road_3_5_1", "road_3_6_0"], "interval": 1.0, "startTime": 514, "endTime": 514},
{"vehicle": {"length": 5.0, "width": 2.0, "maxPosAcc": 2.0, "maxNegAcc": 4.5, "usualPosAcc": 2.0, "usualNegAcc": 4.5, "minGap": 2.5, "maxSpeed": 11.111, "headwayTime": 2}, "route": ["road_0_13_0", "road_1_13_0", "road_2_13_3", "road_2_12_3", "road_2_11_3", "road_2_10_3", "road_2_9_3", "road_2_8_3", "road_2_7_3", "road_2_6_3", "road_2_5_3", "road_2_4_3", "road_2_3_3", "road_2_2_3", "road_2_1_0", "road_3_1_3"], "interval": 1.0, "startTime": 517, "endTime": 517},
{"vehicle": {"length": 5.0, "width": 2.0, "maxPosAcc": 2.0, "maxNegAcc": 4.5, "usualPosAcc": 2.0, "usualNegAcc": 4.5, "minGap": 2.5, "maxSpeed": 11.111, "headwayTime": 2}, "route": ["road_3_0_1", "road_3_1_1", "road_3_2_1", "road_3_3_1", "road_3_4_1", "road_3_5_1", "road_3_6_1", "road_3_7_1", "road_3_8_1", "road_3_9_1", "road_3_10_1", "road_3_11_1", "road_3_12_1", "road_3_13_1", "road_3_14_1", "road_3_15_1", "road_3_16_1"], "interval": 1.0, "startTime": 522, "endTime": 522},
{"vehicle": {"length": 5.0, "width": 2.0, "maxPosAcc": 2.0, "maxNegAcc": 4.5, "usualPosAcc": 2.0, "usualNegAcc": 4.5, "minGap": 2.5, "maxSpeed": 11.111, "headwayTime": 2}, "route": ["road_3_0_1", "road_3_1_1", "road_3_2_1", "road_3_3_1", "road_3_4_1", "road_3_5_1", "road_3_6_1", "road_3_7_1", "road_3_8_1", "road_3_9_1", "road_3_10_1", "road_3_11_0"], "interval": 1.0, "startTime": 525, "endTime": 525},
{"vehicle": {"length": 5.0, "width": 2.0, "maxPosAcc": 2.0, "maxNegAcc": 4.5, "usualPosAcc": 2.0, "usualNegAcc": 4.5, "minGap": 2.5, "maxSpeed": 11.111, "headwayTime": 2}, "route": ["road_3_0_1", "road_3_1_1", "road_3_2_1", "road_3_3_1", "road_3_4_1", "road_3_5_1", "road_3_6_1", "road_3_7_1", "road_3_8_1", "road_3_9_1", "road_3_10_1", "road_3_11_1", "road_3_12_1", "road_3_13_1", "road_3_14_1", "road_3_15_1", "road_3_16_2", "road_2_16_1"], "interval": 1.0, "startTime": 526, "endTime": 526},
{"vehicle": {"length": 5.0, "width": 2.0, "maxPosAcc": 2.0, "maxNegAcc": 4.5, "usualPosAcc": 2.0, "usualNegAcc": 4.5, "minGap": 2.5, "maxSpeed": 11.111, "headwayTime": 2}, "route": ["road_3_17_3", "road_3_16_2", "road_2_16_3", "road_2_15_3", "road_2_14_3", "road_2_13_3", "road_2_12_3", "road_2_11_3", "road_2_10_3", "road_2_9_3", "road_2_8_3", "road_2_7_3", "road_2_6_3", "road_2_5_3", "road_2_4_3", "road_2_3_3", "road_2_2_3", "road_2_1_3"], "interval": 1.0, "startTime": 529, "endTime": 529},
{"vehicle": {"length": 5.0, "width": 2.0, "maxPosAcc": 2.0, "maxNegAcc": 4.5, "usualPosAcc": 2.0, "usualNegAcc": 4.5, "minGap": 2.5, "maxSpeed": 11.111, "headwayTime": 2}, "route": ["road_4_2_2", "road_3_2_1", "road_3_3_1", "road_3_4_2", "road_2_4_2", "road_1_4_1", "road_1_5_1", "road_1_6_1", "road_1_7_1", "road_1_8_1", "road_1_9_1", "road_1_10_1", "road_1_11_1", "road_1_12_1", "road_1_13_1", "road_1_14_1", "road_1_15_2"], "interval": 1.0, "startTime": 530, "endTime": 530},
{"vehicle": {"length": 5.0, "width": 2.0, "maxPosAcc": 2.0, "maxNegAcc": 4.5, "usualPosAcc": 2.0, "usualNegAcc": 4.5, "minGap": 2.5, "maxSpeed": 11.111, "headwayTime": 2}, "route": ["road_4_13_2", "road_3_13_1", "road_3_14_2", "road_2_14_3", "road_2_13_3", "road_2_12_3", "road_2_11_3", "road_2_10_3", "road_2_9_3", "road_2_8_3", "road_2_7_3", "road_2_6_3", "road_2_5_0", "road_3_5_1", "road_3_6_0"], "interval": 1.0, "startTime": 532, "endTime": 532},
{"vehicle": {"length": 5.0, "width": 2.0, "maxPosAcc": 2.0, "maxNegAcc": 4.5, "usualPosAcc": 2.0, "usualNegAcc": 4.5, "minGap": 2.5, "maxSpeed": 11.111, "headwayTime": 2}, "route": ["road_4_3_2", "road_3_3_1", "road_3_4_1", "road_3_5_1", "road_3_6_1", "road_3_7_1", "road_3_8_1", "road_3_9_0"], "interval": 1.0, "startTime": 533, "endTime": 533},
{"vehicle": {"length": 5.0, "width": 2.0, "maxPosAcc": 2.0, "maxNegAcc": 4.5, "usualPosAcc": 2.0, "usualNegAcc": 4.5, "minGap": 2.5, "maxSpeed": 11.111, "headwayTime": 2}, "route": ["road_4_2_2", "road_3_2_1", "road_3_3_1", "road_3_4_1", "road_3_5_1", "road_3_6_2", "road_2_6_2", "road_1_6_2"], "interval": 1.0, "startTime": 534, "endTime": 534},
{"vehicle": {"length": 5.0, "width": 2.0, "maxPosAcc": 2.0, "maxNegAcc": 4.5, "usualPosAcc": 2.0, "usualNegAcc": 4.5, "minGap": 2.5, "maxSpeed": 11.111, "headwayTime": 2}, "route": ["road_4_3_2", "road_3_3_1", "road_3_4_1", "road_3_5_1", "road_3_6_1", "road_3_7_1", "road_3_8_1", "road_3_9_1", "road_3_10_1", "road_3_11_0"], "interval": 1.0, "startTime": 537, "endTime": 537},
{"vehicle": {"length": 5.0, "width": 2.0, "maxPosAcc": 2.0, "maxNegAcc": 4.5, "usualPosAcc": 2.0, "usualNegAcc": 4.5, "minGap": 2.5, "maxSpeed": 11.111, "headwayTime": 2}, "route": ["road_4_13_2", "road_3_13_1", "road_3_14_2", "road_2_14_3", "road_2_13_3", "road_2_12_3", "road_2_11_3", "road_2_10_3", "road_2_9_3", "road_2_8_3", "road_2_7_3", "road_2_6_3", "road_2_5_3", "road_2_4_2", "road_1_4_1", "road_1_5_2"], "interval": 1.0, "startTime": 538, "endTime": 538},
{"vehicle": {"length": 5.0, "width": 2.0, "maxPosAcc": 2.0, "maxNegAcc": 4.5, "usualPosAcc": 2.0, "usualNegAcc": 4.5, "minGap": 2.5, "maxSpeed": 11.111, "headwayTime": 2}, "route": ["road_4_15_2", "road_3_15_1", "road_3_16_2", "road_2_16_3", "road_2_15_3", "road_2_14_3", "road_2_13_3", "road_2_12_3", "road_2_11_3", "road_2_10_3", "road_2_9_3", "road_2_8_3", "road_2_7_3", "road_2_6_3", "road_2_5_0", "road_3_5_1", "road_3_6_0"], "interval": 1.0, "startTime": 540, "endTime": 540},
{"vehicle": {"length": 5.0, "width": 2.0, "maxPosAcc": 2.0, "maxNegAcc": 4.5, "usualPosAcc": 2.0, "usualNegAcc": 4.5, "minGap": 2.5, "maxSpeed": 11.111, "headwayTime": 2}, "route": ["road_0_15_0", "road_1_15_0", "road_2_15_3", "road_2_14_3", "road_2_13_3", "road_2_12_3", "road_2_11_3", "road_2_10_3", "road_2_9_3", "road_2_8_3", "road_2_7_3", "road_2_6_3", "road_2_5_3", "road_2_4_2", "road_1_4_1", "road_1_5_2"], "interval": 1.0, "startTime": 540, "endTime": 540},
{"vehicle": {"length": 5.0, "width": 2.0, "maxPosAcc": 2.0, "maxNegAcc": 4.5, "usualPosAcc": 2.0, "usualNegAcc": 4.5, "minGap": 2.5, "maxSpeed": 11.111, "headwayTime": 2}, "route": ["road_4_8_2", "road_3_8_2", "road_2_8_3", "road_2_7_3", "road_2_6_3", "road_2_5_3", "road_2_4_3", "road_2_3_0", "road_3_3_1", "road_3_4_0"], "interval": 1.0, "startTime": 540, "endTime": 540},
{"vehicle": {"length": 5.0, "width": 2.0, "maxPosAcc": 2.0, "maxNegAcc": 4.5, "usualPosAcc": 2.0, "usualNegAcc": 4.5, "minGap": 2.5, "maxSpeed": 11.111, "headwayTime": 2}, "route": ["road_4_4_2", "road_3_4_1", "road_3_5_1", "road_3_6_1", "road_3_7_1", "road_3_8_1", "road_3_9_1", "road_3_10_0"], "interval": 1.0, "startTime": 540, "endTime": 540},
{"vehicle": {"length": 5.0, "width": 2.0, "maxPosAcc": 2.0, "maxNegAcc": 4.5, "usualPosAcc": 2.0, "usualNegAcc": 4.5, "minGap": 2.5, "maxSpeed": 11.111, "headwayTime": 2}, "route": ["road_0_4_0", "road_1_4_1", "road_1_5_1", "road_1_6_1", "road_1_7_1", "road_1_8_1", "road_1_9_1", "road_1_10_2"], "interval": 1.0, "startTime": 540, "endTime": 540},
{"vehicle": {"length": 5.0, "width": 2.0, "maxPosAcc": 2.0, "maxNegAcc": 4.5, "usualPosAcc": 2.0, "usualNegAcc": 4.5, "minGap": 2.5, "maxSpeed": 11.111, "headwayTime": 2}, "route": ["road_3_0_1", "road_3_1_2", "road_2_1_2", "road_1_1_3"], "interval": 1.0, "startTime": 540, "endTime": 540},
{"vehicle": {"length": 5.0, "width": 2.0, "maxPosAcc": 2.0, "maxNegAcc": 4.5, "usualPosAcc": 2.0, "usualNegAcc": 4.5, "minGap": 2.5, "maxSpeed": 11.111, "headwayTime": 2}, "route": ["road_4_3_2", "road_3_3_1", "road_3_4_1", "road_3_5_1", "road_3_6_1", "road_3_7_1", "road_3_8_1", "road_3_9_1", "road_3_10_1", "road_3_11_1", "road_3_12_1", "road_3_13_1", "road_3_14_2", "road_2_14_2", "road_1_14_1", "road_1_15_1", "road_1_16_1"], "interval": 1.0, "startTime": 540, "endTime": 540},
{"vehicle": {"length": 5.0, "width": 2.0, "maxPosAcc": 2.0, "maxNegAcc": 4.5, "usualPosAcc": 2.0, "usualNegAcc": 4.5, "minGap": 2.5, "maxSpeed": 11.111, "headwayTime": 2}, "route": ["road_4_5_2", "road_3_5_1", "road_3_6_1", "road_3_7_1", "road_3_8_1", "road_3_9_1", "road_3_10_1", "road_3_11_1", "road_3_12_1", "road_3_13_1", "road_3_14_0"], "interval": 1.0, "startTime": 540, "endTime": 540},
{"vehicle": {"length": 5.0, "width": 2.0, "maxPosAcc": 2.0, "maxNegAcc": 4.5, "usualPosAcc": 2.0, "usualNegAcc": 4.5, "minGap": 2.5, "maxSpeed": 11.111, "headwayTime": 2}, "route": ["road_4_7_2", "road_3_7_1", "road_3_8_1", "road_3_9_1", "road_3_10_1", "road_3_11_1", "road_3_12_1", "road_3_13_1", "road_3_14_2", "road_2_14_2", "road_1_14_1", "road_1_15_1", "road_1_16_1"], "interval": 1.0, "startTime": 540, "endTime": 540},
{"vehicle": {"length": 5.0, "width": 2.0, "maxPosAcc": 2.0, "maxNegAcc": 4.5, "usualPosAcc": 2.0, "usualNegAcc": 4.5, "minGap": 2.5, "maxSpeed": 11.111, "headwayTime": 2}, "route": ["road_4_9_2", "road_3_9_1", "road_3_10_1", "road_3_11_1", "road_3_12_1", "road_3_13_1", "road_3_14_1", "road_3_15_1", "road_3_16_2", "road_2_16_1"], "interval": 1.0, "startTime": 540, "endTime": 540},
{"vehicle": {"length": 5.0, "width": 2.0, "maxPosAcc": 2.0, "maxNegAcc": 4.5, "usualPosAcc": 2.0, "usualNegAcc": 4.5, "minGap": 2.5, "maxSpeed": 11.111, "headwayTime": 2}, "route": ["road_4_11_2", "road_3_11_1", "road_3_12_2", "road_2_12_3", "road_2_11_3", "road_2_10_3", "road_2_9_3", "road_2_8_3", "road_2_7_3", "road_2_6_3", "road_2_5_3", "road_2_4_3", "road_2_3_3", "road_2_2_3", "road_2_1_0", "road_3_1_3"], "interval": 1.0, "startTime": 540, "endTime": 540},
{"vehicle": {"length": 5.0, "width": 2.0, "maxPosAcc": 2.0, "maxNegAcc": 4.5, "usualPosAcc": 2.0, "usualNegAcc": 4.5, "minGap": 2.5, "maxSpeed": 11.111, "headwayTime": 2}, "route": ["road_4_12_2", "road_3_12_2", "road_2_12_3", "road_2_11_3", "road_2_10_3", "road_2_9_3", "road_2_8_3", "road_2_7_3", "road_2_6_3", "road_2_5_3", "road_2_4_3", "road_2_3_3", "road_2_2_3", "road_2_1_0", "road_3_1_3"], "interval": 1.0, "startTime": 540, "endTime": 540},
{"vehicle": {"length": 5.0, "width": 2.0, "maxPosAcc": 2.0, "maxNegAcc": 4.5, "usualPosAcc": 2.0, "usualNegAcc": 4.5, "minGap": 2.5, "maxSpeed": 11.111, "headwayTime": 2}, "route": ["road_4_13_2", "road_3_13_1", "road_3_14_1", "road_3_15_1", "road_3_16_1"], "interval": 1.0, "startTime": 540, "endTime": 540},
{"vehicle": {"length": 5.0, "width": 2.0, "maxPosAcc": 2.0, "maxNegAcc": 4.5, "usualPosAcc": 2.0, "usualNegAcc": 4.5, "minGap": 2.5, "maxSpeed": 11.111, "headwayTime": 2}, "route": ["road_4_14_2", "road_3_14_2", "road_2_14_3", "road_2_13_3", "road_2_12_3", "road_2_11_3", "road_2_10_2", "road_1_10_1", "road_1_11_2"], "interval": 1.0, "startTime": 540, "endTime": 540},
{"vehicle": {"length": 5.0, "width": 2.0, "maxPosAcc": 2.0, "maxNegAcc": 4.5, "usualPosAcc": 2.0, "usualNegAcc": 4.5, "minGap": 2.5, "maxSpeed": 11.111, "headwayTime": 2}, "route": ["road_1_0_1", "road_1_1_0", "road_2_1_0", "road_3_1_3"], "interval": 1.0, "startTime": 540, "endTime": 540},
{"vehicle": {"length": 5.0, "width": 2.0, "maxPosAcc": 2.0, "maxNegAcc": 4.5, "usualPosAcc": 2.0, "usualNegAcc": 4.5, "minGap": 2.5, "maxSpeed": 11.111, "headwayTime": 2}, "route": ["road_0_14_0", "road_1_14_1", "road_1_15_0", "road_2_15_3", "road_2_14_3", "road_2_13_3", "road_2_12_3", "road_2_11_3", "road_2_10_3", "road_2_9_3", "road_2_8_3", "road_2_7_3", "road_2_6_3", "road_2_5_3", "road_2_4_3", "road_2_3_3", "road_2_2_2", "road_1_2_2"], "interval": 1.0, "startTime": 540, "endTime": 540},
{"vehicle": {"length": 5.0, "width": 2.0, "maxPosAcc": 2.0, "maxNegAcc": 4.5, "usualPosAcc": 2.0, "usualNegAcc": 4.5, "minGap": 2.5, "maxSpeed": 11.111, "headwayTime": 2}, "route": ["road_0_3_0", "road_1_3_0", "road_2_3_0", "road_3_3_1", "road_3_4_1", "road_3_5_0"], "interval": 1.0, "startTime": 540, "endTime": 540},
{"vehicle": {"length": 5.0, "width": 2.0, "maxPosAcc": 2.0, "maxNegAcc": 4.5, "usualPosAcc": 2.0, "usualNegAcc": 4.5, "minGap": 2.5, "maxSpeed": 11.111, "headwayTime": 2}, "route": ["road_2_17_3", "road_2_16_3", "road_2_15_3", "road_2_14_3", "road_2_13_3", "road_2_12_3", "road_2_11_3", "road_2_10_3", "road_2_9_3", "road_2_8_3", "road_2_7_3", "road_2_6_3", "road_2_5_3", "road_2_4_3", "road_2_3_3", "road_2_2_3", "road_2_1_2", "road_1_1_3"], "interval": 1.0, "startTime": 540, "endTime": 540},
{"vehicle": {"length": 5.0, "width": 2.0, "maxPosAcc": 2.0, "maxNegAcc": 4.5, "usualPosAcc": 2.0, "usualNegAcc": 4.5, "minGap": 2.5, "maxSpeed": 11.111, "headwayTime": 2}, "route": ["road_1_17_3", "road_1_16_0", "road_2_16_3", "road_2_15_3", "road_2_14_3", "road_2_13_3", "road_2_12_3", "road_2_11_3", "road_2_10_3", "road_2_9_3", "road_2_8_3", "road_2_7_3", "road_2_6_3", "road_2_5_0", "road_3_5_0"], "interval": 1.0, "startTime": 540, "endTime": 540},
{"vehicle": {"length": 5.0, "width": 2.0, "maxPosAcc": 2.0, "maxNegAcc": 4.5, "usualPosAcc": 2.0, "usualNegAcc": 4.5, "minGap": 2.5, "maxSpeed": 11.111, "headwayTime": 2}, "route": ["road_4_2_2", "road_3_2_1", "road_3_3_1", "road_3_4_1", "road_3_5_1", "road_3_6_1", "road_3_7_1", "road_3_8_1", "road_3_9_1", "road_3_10_1", "road_3_11_1", "road_3_12_1", "road_3_13_1", "road_3_14_0"], "interval": 1.0, "startTime": 540, "endTime": 540},
{"vehicle": {"length": 5.0, "width": 2.0, "maxPosAcc": 2.0, "maxNegAcc": 4.5, "usualPosAcc": 2.0, "usualNegAcc": 4.5, "minGap": 2.5, "maxSpeed": 11.111, "headwayTime": 2}, "route": ["road_4_12_2", "road_3_12_2", "road_2_12_3", "road_2_11_3", "road_2_10_3", "road_2_9_0", "road_3_9_0"], "interval": 1.0, "startTime": 544, "endTime": 544},
{"vehicle": {"length": 5.0, "width": 2.0, "maxPosAcc": 2.0, "maxNegAcc": 4.5, "usualPosAcc": 2.0, "usualNegAcc": 4.5, "minGap": 2.5, "maxSpeed": 11.111, "headwayTime": 2}, "route": ["road_4_6_2", "road_3_6_1", "road_3_7_1", "road_3_8_1", "road_3_9_1", "road_3_10_1", "road_3_11_1", "road_3_12_1", "road_3_13_1", "road_3_14_1", "road_3_15_1", "road_3_16_2", "road_2_16_1"], "interval": 1.0, "startTime": 546, "endTime": 546},
{"vehicle": {"length": 5.0, "width": 2.0, "maxPosAcc": 2.0, "maxNegAcc": 4.5, "usualPosAcc": 2.0, "usualNegAcc": 4.5, "minGap": 2.5, "maxSpeed": 11.111, "headwayTime": 2}, "route": ["road_4_10_2", "road_3_10_2", "road_2_10_3", "road_2_9_3", "road_2_8_3", "road_2_7_0", "road_3_7_0"], "interval": 1.0, "startTime": 549, "endTime": 549},
{"vehicle": {"length": 5.0, "width": 2.0, "maxPosAcc": 2.0, "maxNegAcc": 4.5, "usualPosAcc": 2.0, "usualNegAcc": 4.5, "minGap": 2.5, "maxSpeed": 11.111, "headwayTime": 2}, "route": ["road_4_14_2", "road_3_14_2", "road_2_14_3", "road_2_13_3", "road_2_12_3", "road_2_11_3", "road_2_10_3", "road_2_9_3", "road_2_8_3", "road_2_7_3", "road_2_6_3", "road_2_5_3", "road_2_4_2", "road_1_4_2"], "interval": 1.0, "startTime": 551, "endTime": 551},
{"vehicle": {"length": 5.0, "width": 2.0, "maxPosAcc": 2.0, "maxNegAcc": 4.5, "usualPosAcc": 2.0, "usualNegAcc": 4.5, "minGap": 2.5, "maxSpeed": 11.111, "headwayTime": 2}, "route": ["road_0_12_0", "road_1_12_1", "road_1_13_0", "road_2_13_3", "road_2_12_3", "road_2_11_3", "road_2_10_3", "road_2_9_3", "road_2_8_3", "road_2_7_3", "road_2_6_3", "road_2_5_3", "road_2_4_3", "road_2_3_3", "road_2_2_3", "road_2_1_2", "road_1_1_3"], "interval": 1.0, "startTime": 554, "endTime": 554},
{"vehicle": {"length": 5.0, "width": 2.0, "maxPosAcc": 2.0, "maxNegAcc": 4.5, "usualPosAcc": 2.0, "usualNegAcc": 4.5, "minGap": 2.5, "maxSpeed": 11.111, "headwayTime": 2}, "route": ["road_4_2_2", "road_3_2_1", "road_3_3_1", "road_3_4_1", "road_3_5_1", "road_3_6_2", "road_2_6_2", "road_1_6_1", "road_1_7_2"], "interval": 1.0, "startTime": 554, "endTime": 554},
{"vehicle": {"length": 5.0, "width": 2.0, "maxPosAcc": 2.0, "maxNegAcc": 4.5, "usualPosAcc": 2.0, "usualNegAcc": 4.5, "minGap": 2.5, "maxSpeed": 11.111, "headwayTime": 2}, "route": ["road_1_0_1", "road_1_1_1", "road_1_2_1", "road_1_3_1", "road_1_4_1", "road_1_5_1", "road_1_6_1", "road_1_7_1", "road_1_8_1", "road_1_9_1", "road_1_10_1", "road_1_11_1", "road_1_12_1", "road_1_13_1", "road_1_14_1", "road_1_15_0", "road_2_15_0", "road_3_15_1", "road_3_16_1"], "interval": 1.0, "startTime": 556, "endTime": 556},
{"vehicle": {"length": 5.0, "width": 2.0, "maxPosAcc": 2.0, "maxNegAcc": 4.5, "usualPosAcc": 2.0, "usualNegAcc": 4.5, "minGap": 2.5, "maxSpeed": 11.111, "headwayTime": 2}, "route": ["road_4_10_2", "road_3_10_2", "road_2_10_3", "road_2_9_3", "road_2_8_3", "road_2_7_3", "road_2_6_3", "road_2_5_3", "road_2_4_3", "road_2_3_3", "road_2_2_3", "road_2_1_2", "road_1_1_3"], "interval": 1.0, "startTime": 562, "endTime": 562},
{"vehicle": {"length": 5.0, "width": 2.0, "maxPosAcc": 2.0, "maxNegAcc": 4.5, "usualPosAcc": 2.0, "usualNegAcc": 4.5, "minGap": 2.5, "maxSpeed": 11.111, "headwayTime": 2}, "route": ["road_4_2_2", "road_3_2_2", "road_2_2_3", "road_2_1_0", "road_3_1_3"], "interval": 1.0, "startTime": 562, "endTime": 562},
{"vehicle": {"length": 5.0, "width": 2.0, "maxPosAcc": 2.0, "maxNegAcc": 4.5, "usualPosAcc": 2.0, "usualNegAcc": 4.5, "minGap": 2.5, "maxSpeed": 11.111, "headwayTime": 2}, "route": ["road_3_17_3", "road_3_16_2", "road_2_16_3", "road_2_15_3", "road_2_14_3", "road_2_13_3", "road_2_12_3", "road_2_11_3", "road_2_10_3", "road_2_9_3", "road_2_8_3", "road_2_7_3", "road_2_6_3", "road_2_5_3", "road_2_4_3", "road_2_3_3", "road_2_2_3", "road_2_1_0", "road_3_1_3"], "interval": 1.0, "startTime": 565, "endTime": 565},
{"vehicle": {"length": 5.0, "width": 2.0, "maxPosAcc": 2.0, "maxNegAcc": 4.5, "usualPosAcc": 2.0, "usualNegAcc": 4.5, "minGap": 2.5, "maxSpeed": 11.111, "headwayTime": 2}, "route": ["road_4_15_2", "road_3_15_1", "road_3_16_2", "road_2_16_3", "road_2_15_3", "road_2_14_3", "road_2_13_3", "road_2_12_3", "road_2_11_3", "road_2_10_3", "road_2_9_3", "road_2_8_3", "road_2_7_3", "road_2_6_3", "road_2_5_3", "road_2_4_3", "road_2_3_3", "road_2_2_3", "road_2_1_2", "road_1_1_3"], "interval": 1.0, "startTime": 570, "endTime": 570},
{"vehicle": {"length": 5.0, "width": 2.0, "maxPosAcc": 2.0, "maxNegAcc": 4.5, "usualPosAcc": 2.0, "usualNegAcc": 4.5, "minGap": 2.5, "maxSpeed": 11.111, "headwayTime": 2}, "route": ["road_4_11_2", "road_3_11_1", "road_3_12_1", "road_3_13_1", "road_3_14_0"], "interval": 1.0, "startTime": 575, "endTime": 575},
{"vehicle": {"length": 5.0, "width": 2.0, "maxPosAcc": 2.0, "maxNegAcc": 4.5, "usualPosAcc": 2.0, "usualNegAcc": 4.5, "minGap": 2.5, "maxSpeed": 11.111, "headwayTime": 2}, "route": ["road_3_17_3", "road_3_16_2", "road_2_16_3", "road_2_15_3", "road_2_14_3", "road_2_13_3", "road_2_12_3", "road_2_11_3", "road_2_10_3", "road_2_9_3", "road_2_8_3", "road_2_7_3", "road_2_6_3", "road_2_5_3", "road_2_4_3", "road_2_3_3", "road_2_2_3", "road_2_1_0", "road_3_1_3"], "interval": 1.0, "startTime": 575, "endTime": 575},
{"vehicle": {"length": 5.0, "width": 2.0, "maxPosAcc": 2.0, "maxNegAcc": 4.5, "usualPosAcc": 2.0, "usualNegAcc": 4.5, "minGap": 2.5, "maxSpeed": 11.111, "headwayTime": 2}, "route": ["road_4_4_2", "road_3_4_1", "road_3_5_1", "road_3_6_1", "road_3_7_0"], "interval": 1.0, "startTime": 577, "endTime": 577},
{"vehicle": {"length": 5.0, "width": 2.0, "maxPosAcc": 2.0, "maxNegAcc": 4.5, "usualPosAcc": 2.0, "usualNegAcc": 4.5, "minGap": 2.5, "maxSpeed": 11.111, "headwayTime": 2}, "route": ["road_0_9_0", "road_1_9_1", "road_1_10_1", "road_1_11_1", "road_1_12_1", "road_1_13_1", "road_1_14_1", "road_1_15_1", "road_1_16_1"], "interval": 1.0, "startTime": 577, "endTime": 577},
{"vehicle": {"length": 5.0, "width": 2.0, "maxPosAcc": 2.0, "maxNegAcc": 4.5, "usualPosAcc": 2.0, "usualNegAcc": 4.5, "minGap": 2.5, "maxSpeed": 11.111, "headwayTime": 2}, "route": ["road_4_2_2", "road_3_2_1", "road_3_3_1", "road_3_4_1", "road_3_5_1", "road_3_6_1", "road_3_7_1", "road_3_8_0"], "interval": 1.0, "startTime": 581, "endTime": 581},
{"vehicle": {"length": 5.0, "width": 2.0, "maxPosAcc": 2.0, "maxNegAcc": 4.5, "usualPosAcc": 2.0, "usualNegAcc": 4.5, "minGap": 2.5, "maxSpeed": 11.111, "headwayTime": 2}, "route": ["road_3_17_3", "road_3_16_2", "road_2_16_1"], "interval": 1.0, "startTime": 593, "endTime": 593},
{"vehicle": {"length": 5.0, "width": 2.0, "maxPosAcc": 2.0, "maxNegAcc": 4.5, "usualPosAcc": 2.0, "usualNegAcc": 4.5, "minGap": 2.5, "maxSpeed": 11.111, "headwayTime": 2}, "route": ["road_3_0_1", "road_3_1_1", "road_3_2_1", "road_3_3_1", "road_3_4_1", "road_3_5_1", "road_3_6_1", "road_3_7_1", "road_3_8_1", "road_3_9_1", "road_3_10_1", "road_3_11_1", "road_3_12_1", "road_3_13_1", "road_3_14_1", "road_3_15_1", "road_3_16_1"], "interval": 1.0, "startTime": 594, "endTime": 594},
{"vehicle": {"length": 5.0, "width": 2.0, "maxPosAcc": 2.0, "maxNegAcc": 4.5, "usualPosAcc": 2.0, "usualNegAcc": 4.5, "minGap": 2.5, "maxSpeed": 11.111, "headwayTime": 2}, "route": ["road_4_14_2", "road_3_14_2", "road_2_14_3", "road_2_13_3", "road_2_12_3", "road_2_11_3", "road_2_10_3", "road_2_9_3", "road_2_8_3", "road_2_7_3", "road_2_6_2", "road_1_6_1", "road_1_7_2"], "interval": 1.0, "startTime": 594, "endTime": 594},
{"vehicle": {"length": 5.0, "width": 2.0, "maxPosAcc": 2.0, "maxNegAcc": 4.5, "usualPosAcc": 2.0, "usualNegAcc": 4.5, "minGap": 2.5, "maxSpeed": 11.111, "headwayTime": 2}, "route": ["road_0_5_0", "road_1_5_1", "road_1_6_1", "road_1_7_1", "road_1_8_1", "road_1_9_1", "road_1_10_1", "road_1_11_1", "road_1_12_1", "road_1_13_1", "road_1_14_2"], "interval": 1.0, "startTime": 596, "endTime": 596},
{"vehicle": {"length": 5.0, "width": 2.0, "maxPosAcc": 2.0, "maxNegAcc": 4.5, "usualPosAcc": 2.0, "usualNegAcc": 4.5, "minGap": 2.5, "maxSpeed": 11.111, "headwayTime": 2}, "route": ["road_0_15_0", "road_1_15_0", "road_2_15_3", "road_2_14_3", "road_2_13_3", "road_2_12_3", "road_2_11_3", "road_2_10_3", "road_2_9_3", "road_2_8_3", "road_2_7_3", "road_2_6_3", "road_2_5_3", "road_2_4_3", "road_2_3_3", "road_2_2_2", "road_1_2_2"], "interval": 1.0, "startTime": 600, "endTime": 600},
{"vehicle": {"length": 5.0, "width": 2.0, "maxPosAcc": 2.0, "maxNegAcc": 4.5, "usualPosAcc": 2.0, "usualNegAcc": 4.5, "minGap": 2.5, "maxSpeed": 11.111, "headwayTime": 2}, "route": ["road_4_8_2", "road_3_8_2", "road_2_8_3", "road_2_7_3", "road_2_6_2", "road_1_6_2"], "interval": 1.0, "startTime": 600, "endTime": 600},
{"vehicle": {"length": 5.0, "width": 2.0, "maxPosAcc": 2.0, "maxNegAcc": 4.5, "usualPosAcc": 2.0, "usualNegAcc": 4.5, "minGap": 2.5, "maxSpeed": 11.111, "headwayTime": 2}, "route": ["road_4_4_2", "road_3_4_1", "road_3_5_1", "road_3_6_1", "road_3_7_1", "road_3_8_1", "road_3_9_1", "road_3_10_1", "road_3_11_1", "road_3_12_1", "road_3_13_1", "road_3_14_2", "road_2_14_2", "road_1_14_1", "road_1_15_1", "road_1_16_1"], "interval": 1.0, "startTime": 600, "endTime": 600},
{"vehicle": {"length": 5.0, "width": 2.0, "maxPosAcc": 2.0, "maxNegAcc": 4.5, "usualPosAcc": 2.0, "usualNegAcc": 4.5, "minGap": 2.5, "maxSpeed": 11.111, "headwayTime": 2}, "route": ["road_3_0_1", "road_3_1_2", "road_2_1_2", "road_1_1_3"], "interval": 1.0, "startTime": 600, "endTime": 600},
{"vehicle": {"length": 5.0, "width": 2.0, "maxPosAcc": 2.0, "maxNegAcc": 4.5, "usualPosAcc": 2.0, "usualNegAcc": 4.5, "minGap": 2.5, "maxSpeed": 11.111, "headwayTime": 2}, "route": ["road_4_6_2", "road_3_6_2", "road_2_6_3", "road_2_5_3", "road_2_4_3", "road_2_3_0", "road_3_3_1", "road_3_4_0"], "interval": 1.0, "startTime": 600, "endTime": 600},
{"vehicle": {"length": 5.0, "width": 2.0, "maxPosAcc": 2.0, "maxNegAcc": 4.5, "usualPosAcc": 2.0, "usualNegAcc": 4.5, "minGap": 2.5, "maxSpeed": 11.111, "headwayTime": 2}, "route": ["road_4_7_2", "road_3_7_1", "road_3_8_1", "road_3_9_1", "road_3_10_1", "road_3_11_1", "road_3_12_0"], "interval": 1.0, "startTime": 600, "endTime": 600},
{"vehicle": {"length": 5.0, "width": 2.0, "maxPosAcc": 2.0, "maxNegAcc": 4.5, "usualPosAcc": 2.0, "usualNegAcc": 4.5, "minGap": 2.5, "maxSpeed": 11.111, "headwayTime": 2}, "route": ["road_4_10_2", "road_3_10_2", "road_2_10_3", "road_2_9_3", "road_2_8_3", "road_2_7_0", "road_3_7_0"], "interval": 1.0, "startTime": 600, "endTime": 600},
{"vehicle": {"length": 5.0, "width": 2.0, "maxPosAcc": 2.0, "maxNegAcc": 4.5, "usualPosAcc": 2.0, "usualNegAcc": 4.5, "minGap": 2.5, "maxSpeed": 11.111, "headwayTime": 2}, "route": ["road_4_11_2", "road_3_11_1", "road_3_12_2", "road_2_12_3", "road_2_11_3", "road_2_10_3", "road_2_9_3", "road_2_8_2", "road_1_8_2"], "interval": 1.0, "startTime": 600, "endTime": 600},
{"vehicle": {"length": 5.0, "width": 2.0, "maxPosAcc": 2.0, "maxNegAcc": 4.5, "usualPosAcc": 2.0, "usualNegAcc": 4.5, "minGap": 2.5, "maxSpeed": 11.111, "headwayTime": 2}, "route": ["road_4_12_2", "road_3_12_2", "road_2_12_3", "road_2_11_3", "road_2_10_3", "road_2_9_3", "road_2_8_3", "road_2_7_3", "road_2_6_3", "road_2_5_3", "road_2_4_3", "road_2_3_3", "road_2_2_3", "road_2_1_0", "road_3_1_3"], "interval": 1.0, "startTime": 600, "endTime": 600},
{"vehicle": {"length": 5.0, "width": 2.0, "maxPosAcc": 2.0, "maxNegAcc": 4.5, "usualPosAcc": 2.0, "usualNegAcc": 4.5, "minGap": 2.5, "maxSpeed": 11.111, "headwayTime": 2}, "route": ["road_4_14_2", "road_3_14_2", "road_2_14_3", "road_2_13_3", "road_2_12_3", "road_2_11_3", "road_2_10_3", "road_2_9_3", "road_2_8_3", "road_2_7_3", "road_2_6_3", "road_2_5_0", "road_3_5_1", "road_3_6_0"], "interval": 1.0, "startTime": 600, "endTime": 600},
{"vehicle": {"length": 5.0, "width": 2.0, "maxPosAcc": 2.0, "maxNegAcc": 4.5, "usualPosAcc": 2.0, "usualNegAcc": 4.5, "minGap": 2.5, "maxSpeed": 11.111, "headwayTime": 2}, "route": ["road_3_17_3", "road_3_16_2", "road_2_16_3", "road_2_15_3", "road_2_14_3", "road_2_13_3", "road_2_12_3", "road_2_11_3", "road_2_10_3", "road_2_9_0", "road_3_9_0"], "interval": 1.0, "startTime": 600, "endTime": 600},
{"vehicle": {"length": 5.0, "width": 2.0, "maxPosAcc": 2.0, "maxNegAcc": 4.5, "usualPosAcc": 2.0, "usualNegAcc": 4.5, "minGap": 2.5, "maxSpeed": 11.111, "headwayTime": 2}, "route": ["road_1_0_1", "road_1_1_0", "road_2_1_0", "road_3_1_3"], "interval": 1.0, "startTime": 600, "endTime": 600},
{"vehicle": {"length": 5.0, "width": 2.0, "maxPosAcc": 2.0, "maxNegAcc": 4.5, "usualPosAcc": 2.0, "usualNegAcc": 4.5, "minGap": 2.5, "maxSpeed": 11.111, "headwayTime": 2}, "route": ["road_0_9_0", "road_1_9_0", "road_2_9_3", "road_2_8_3", "road_2_7_0", "road_3_7_1", "road_3_8_0"], "interval": 1.0, "startTime": 600, "endTime": 600},
{"vehicle": {"length": 5.0, "width": 2.0, "maxPosAcc": 2.0, "maxNegAcc": 4.5, "usualPosAcc": 2.0, "usualNegAcc": 4.5, "minGap": 2.5, "maxSpeed": 11.111, "headwayTime": 2}, "route": ["road_0_10_0", "road_1_10_1", "road_1_11_0", "road_2_11_3", "road_2_10_3", "road_2_9_3", "road_2_8_3", "road_2_7_3", "road_2_6_3", "road_2_5_3", "road_2_4_3", "road_2_3_3", "road_2_2_2", "road_1_2_2"], "interval": 1.0, "startTime": 600, "endTime": 600},
{"vehicle": {"length": 5.0, "width": 2.0, "maxPosAcc": 2.0, "maxNegAcc": 4.5, "usualPosAcc": 2.0, "usualNegAcc": 4.5, "minGap": 2.5, "maxSpeed": 11.111, "headwayTime": 2}, "route": ["road_1_17_3", "road_1_16_0", "road_2_16_3", "road_2_15_3", "road_2_14_3", "road_2_13_3", "road_2_12_3", "road_2_11_3", "road_2_10_3", "road_2_9_3", "road_2_8_3", "road_2_7_3", "road_2_6_3", "road_2_5_3", "road_2_4_3", "road_2_3_3", "road_2_2_3", "road_2_1_3"], "interval": 1.0, "startTime": 600, "endTime": 600},
{"vehicle": {"length": 5.0, "width": 2.0, "maxPosAcc": 2.0, "maxNegAcc": 4.5, "usualPosAcc": 2.0, "usualNegAcc": 4.5, "minGap": 2.5, "maxSpeed": 11.111, "headwayTime": 2}, "route": ["road_0_5_0", "road_1_5_0", "road_2_5_0", "road_3_5_1", "road_3_6_1", "road_3_7_1", "road_3_8_1", "road_3_9_1", "road_3_10_1", "road_3_11_1", "road_3_12_0"], "interval": 1.0, "startTime": 600, "endTime": 600},
{"vehicle": {"length": 5.0, "width": 2.0, "maxPosAcc": 2.0, "maxNegAcc": 4.5, "usualPosAcc": 2.0, "usualNegAcc": 4.5, "minGap": 2.5, "maxSpeed": 11.111, "headwayTime": 2}, "route": ["road_4_12_2", "road_3_12_2", "road_2_12_3", "road_2_11_3", "road_2_10_3", "road_2_9_3", "road_2_8_3", "road_2_7_0", "road_3_7_0"], "interval": 1.0, "startTime": 602, "endTime": 602},
{"vehicle": {"length": 5.0, "width": 2.0, "maxPosAcc": 2.0, "maxNegAcc": 4.5, "usualPosAcc": 2.0, "usualNegAcc": 4.5, "minGap": 2.5, "maxSpeed": 11.111, "headwayTime": 2}, "route": ["road_0_11_0", "road_1_11_0", "road_2_11_3", "road_2_10_3", "road_2_9_3", "road_2_8_2", "road_1_8_2"], "interval": 1.0, "startTime": 604, "endTime": 604},
{"vehicle": {"length": 5.0, "width": 2.0, "maxPosAcc": 2.0, "maxNegAcc": 4.5, "usualPosAcc": 2.0, "usualNegAcc": 4.5, "minGap": 2.5, "maxSpeed": 11.111, "headwayTime": 2}, "route": ["road_1_17_3", "road_1_16_0", "road_2_16_3", "road_2_15_3", "road_2_14_3", "road_2_13_3", "road_2_12_3", "road_2_11_3", "road_2_10_3", "road_2_9_3", "road_2_8_3", "road_2_7_3", "road_2_6_3", "road_2_5_3", "road_2_4_3", "road_2_3_0", "road_3_3_1", "road_3_4_0"], "interval": 1.0, "startTime": 605, "endTime": 605},
{"vehicle": {"length": 5.0, "width": 2.0, "maxPosAcc": 2.0, "maxNegAcc": 4.5, "usualPosAcc": 2.0, "usualNegAcc": 4.5, "minGap": 2.5, "maxSpeed": 11.111, "headwayTime": 2}, "route": ["road_4_10_2", "road_3_10_2", "road_2_10_3", "road_2_9_3", "road_2_8_3", "road_2_7_3", "road_2_6_3", "road_2_5_3", "road_2_4_3", "road_2_3_3", "road_2_2_3", "road_2_1_2", "road_1_1_3"], "interval": 1.0, "startTime": 606, "endTime": 606},
{"vehicle": {"length": 5.0, "width": 2.0, "maxPosAcc": 2.0, "maxNegAcc": 4.5, "usualPosAcc": 2.0, "usualNegAcc": 4.5, "minGap": 2.5, "maxSpeed": 11.111, "headwayTime": 2}, "route": ["road_1_17_3", "road_1_16_0", "road_2_16_3", "road_2_15_3", "road_2_14_3", "road_2_13_3", "road_2_12_3", "road_2_11_3", "road_2_10_3", "road_2_9_3", "road_2_8_3", "road_2_7_3", "road_2_6_3", "road_2_5_3", "road_2_4_3", "road_2_3_3", "road_2_2_3", "road_2_1_3"], "interval": 1.0, "startTime": 609, "endTime": 609},
{"vehicle": {"length": 5.0, "width": 2.0, "maxPosAcc": 2.0, "maxNegAcc": 4.5, "usualPosAcc": 2.0, "usualNegAcc": 4.5, "minGap": 2.5, "maxSpeed": 11.111, "headwayTime": 2}, "route": ["road_0_3_0", "road_1_3_0", "road_2_3_0", "road_3_3_1", "road_3_4_1", "road_3_5_1", "road_3_6_0"], "interval": 1.0, "startTime": 620, "endTime": 620},
{"vehicle": {"length": 5.0, "width": 2.0, "maxPosAcc": 2.0, "maxNegAcc": 4.5, "usualPosAcc": 2.0, "usualNegAcc": 4.5, "minGap": 2.5, "maxSpeed": 11.111, "headwayTime": 2}, "route": ["road_4_2_2", "road_3_2_1", "road_3_3_1", "road_3_4_1", "road_3_5_1", "road_3_6_1", "road_3_7_1", "road_3_8_1", "road_3_9_0"], "interval": 1.0, "startTime": 622, "endTime": 622},
{"vehicle": {"length": 5.0, "width": 2.0, "maxPosAcc": 2.0, "maxNegAcc": 4.5, "usualPosAcc": 2.0, "usualNegAcc": 4.5, "minGap": 2.5, "maxSpeed": 11.111, "headwayTime": 2}, "route": ["road_4_6_2", "road_3_6_1", "road_3_7_1", "road_3_8_1", "road_3_9_1", "road_3_10_1", "road_3_11_1", "road_3_12_1", "road_3_13_1", "road_3_14_1", "road_3_15_0"], "interval": 1.0, "startTime": 624, "endTime": 624},
{"vehicle": {"length": 5.0, "width": 2.0, "maxPosAcc": 2.0, "maxNegAcc": 4.5, "usualPosAcc": 2.0, "usualNegAcc": 4.5, "minGap": 2.5, "maxSpeed": 11.111, "headwayTime": 2}, "route": ["road_4_13_2", "road_3_13_1", "road_3_14_2", "road_2_14_3", "road_2_13_3", "road_2_12_3", "road_2_11_3", "road_2_10_3", "road_2_9_3", "road_2_8_3", "road_2_7_3", "road_2_6_3", "road_2_5_0", "road_3_5_1", "road_3_6_0"], "interval": 1.0, "startTime": 624, "endTime": 624},
{"vehicle": {"length": 5.0, "width": 2.0, "maxPosAcc": 2.0, "maxNegAcc": 4.5, "usualPosAcc": 2.0, "usualNegAcc": 4.5, "minGap": 2.5, "maxSpeed": 11.111, "headwayTime": 2}, "route": ["road_3_0_1", "road_3_1_1", "road_3_2_1", "road_3_3_1", "road_3_4_1", "road_3_5_1", "road_3_6_1", "road_3_7_1", "road_3_8_1", "road_3_9_1", "road_3_10_1", "road_3_11_1", "road_3_12_1", "road_3_13_1", "road_3_14_1", "road_3_15_1", "road_3_16_1"], "interval": 1.0, "startTime": 625, "endTime": 625},
{"vehicle": {"length": 5.0, "width": 2.0, "maxPosAcc": 2.0, "maxNegAcc": 4.5, "usualPosAcc": 2.0, "usualNegAcc": 4.5, "minGap": 2.5, "maxSpeed": 11.111, "headwayTime": 2}, "route": ["road_0_7_0", "road_1_7_0", "road_2_7_0", "road_3_7_1", "road_3_8_0"], "interval": 1.0, "startTime": 625, "endTime": 625},
{"vehicle": {"length": 5.0, "width": 2.0, "maxPosAcc": 2.0, "maxNegAcc": 4.5, "usualPosAcc": 2.0, "usualNegAcc": 4.5, "minGap": 2.5, "maxSpeed": 11.111, "headwayTime": 2}, "route": ["road_4_13_2", "road_3_13_1", "road_3_14_2", "road_2_14_3", "road_2_13_3", "road_2_12_3", "road_2_11_0", "road_3_11_1", "road_3_12_0"], "interval": 1.0, "startTime": 628, "endTime": 628},
{"vehicle": {"length": 5.0, "width": 2.0, "maxPosAcc": 2.0, "maxNegAcc": 4.5, "usualPosAcc": 2.0, "usualNegAcc": 4.5, "minGap": 2.5, "maxSpeed": 11.111, "headwayTime": 2}, "route": ["road_0_3_0", "road_1_3_0", "road_2_3_3", "road_2_2_2", "road_1_2_2"], "interval": 1.0, "startTime": 633, "endTime": 633},
{"vehicle": {"length": 5.0, "width": 2.0, "maxPosAcc": 2.0, "maxNegAcc": 4.5, "usualPosAcc": 2.0, "usualNegAcc": 4.5, "minGap": 2.5, "maxSpeed": 11.111, "headwayTime": 2}, "route": ["road_4_4_2", "road_3_4_1", "road_3_5_1", "road_3_6_1", "road_3_7_1", "road_3_8_1", "road_3_9_1", "road_3_10_1", "road_3_11_1", "road_3_12_1", "road_3_13_1", "road_3_14_1", "road_3_15_1", "road_3_16_2", "road_2_16_1"], "interval": 1.0, "startTime": 635, "endTime": 635},
{"vehicle": {"length": 5.0, "width": 2.0, "maxPosAcc": 2.0, "maxNegAcc": 4.5, "usualPosAcc": 2.0, "usualNegAcc": 4.5, "minGap": 2.5, "maxSpeed": 11.111, "headwayTime": 2}, "route": ["road_2_0_1", "road_2_1_0", "road_3_1_1", "road_3_2_1", "road_3_3_1", "road_3_4_1", "road_3_5_1", "road_3_6_1", "road_3_7_0"], "interval": 1.0, "startTime": 635, "endTime": 635},
{"vehicle": {"length": 5.0, "width": 2.0, "maxPosAcc": 2.0, "maxNegAcc": 4.5, "usualPosAcc": 2.0, "usualNegAcc": 4.5, "minGap": 2.5, "maxSpeed": 11.111, "headwayTime": 2}, "route": ["road_3_0_1", "road_3_1_1", "road_3_2_1", "road_3_3_1", "road_3_4_1", "road_3_5_1", "road_3_6_1", "road_3_7_1", "road_3_8_1", "road_3_9_0"], "interval": 1.0, "startTime": 637, "endTime": 637},
{"vehicle": {"length": 5.0, "width": 2.0, "maxPosAcc": 2.0, "maxNegAcc": 4.5, "usualPosAcc": 2.0, "usualNegAcc": 4.5, "minGap": 2.5, "maxSpeed": 11.111, "headwayTime": 2}, "route": ["road_0_6_0", "road_1_6_1", "road_1_7_2"], "interval": 1.0, "startTime": 640, "endTime": 640},
{"vehicle": {"length": 5.0, "width": 2.0, "maxPosAcc": 2.0, "maxNegAcc": 4.5, "usualPosAcc": 2.0, "usualNegAcc": 4.5, "minGap": 2.5, "maxSpeed": 11.111, "headwayTime": 2}, "route": ["road_0_7_0", "road_1_7_0", "road_2_7_3", "road_2_6_3", "road_2_5_3", "road_2_4_3", "road_2_3_3", "road_2_2_3", "road_2_1_0", "road_3_1_3"], "interval": 1.0, "startTime": 641, "endTime": 641},
{"vehicle": {"length": 5.0, "width": 2.0, "maxPosAcc": 2.0, "maxNegAcc": 4.5, "usualPosAcc": 2.0, "usualNegAcc": 4.5, "minGap": 2.5, "maxSpeed": 11.111, "headwayTime": 2}, "route": ["road_2_17_3", "road_2_16_3", "road_2_15_3", "road_2_14_3", "road_2_13_3", "road_2_12_3", "road_2_11_3", "road_2_10_3", "road_2_9_3", "road_2_8_3", "road_2_7_3", "road_2_6_3", "road_2_5_3", "road_2_4_3", "road_2_3_3", "road_2_2_2", "road_1_2_1", "road_1_3_2"], "interval": 1.0, "startTime": 641, "endTime": 641},
{"vehicle": {"length": 5.0, "width": 2.0, "maxPosAcc": 2.0, "maxNegAcc": 4.5, "usualPosAcc": 2.0, "usualNegAcc": 4.5, "minGap": 2.5, "maxSpeed": 11.111, "headwayTime": 2}, "route": ["road_0_5_0", "road_1_5_0", "road_2_5_3", "road_2_4_3", "road_2_3_0", "road_3_3_1", "road_3_4_0"], "interval": 1.0, "startTime": 643, "endTime": 643},
{"vehicle": {"length": 5.0, "width": 2.0, "maxPosAcc": 2.0, "maxNegAcc": 4.5, "usualPosAcc": 2.0, "usualNegAcc": 4.5, "minGap": 2.5, "maxSpeed": 11.111, "headwayTime": 2}, "route": ["road_4_4_2", "road_3_4_2", "road_2_4_3", "road_2_3_3", "road_2_2_2", "road_1_2_1", "road_1_3_2"], "interval": 1.0, "startTime": 646, "endTime": 646},
{"vehicle": {"length": 5.0, "width": 2.0, "maxPosAcc": 2.0, "maxNegAcc": 4.5, "usualPosAcc": 2.0, "usualNegAcc": 4.5, "minGap": 2.5, "maxSpeed": 11.111, "headwayTime": 2}, "route": ["road_4_10_2", "road_3_10_1", "road_3_11_1", "road_3_12_1", "road_3_13_1", "road_3_14_2", "road_2_14_2", "road_1_14_1", "road_1_15_1", "road_1_16_1"], "interval": 1.0, "startTime": 648, "endTime": 648},
{"vehicle": {"length": 5.0, "width": 2.0, "maxPosAcc": 2.0, "maxNegAcc": 4.5, "usualPosAcc": 2.0, "usualNegAcc": 4.5, "minGap": 2.5, "maxSpeed": 11.111, "headwayTime": 2}, "route": ["road_4_4_2", "road_3_4_1", "road_3_5_1", "road_3_6_1", "road_3_7_1", "road_3_8_0"], "interval": 1.0, "startTime": 652, "endTime": 652},
{"vehicle": {"length": 5.0, "width": 2.0, "maxPosAcc": 2.0, "maxNegAcc": 4.5, "usualPosAcc": 2.0, "usualNegAcc": 4.5, "minGap": 2.5, "maxSpeed": 11.111, "headwayTime": 2}, "route": ["road_2_17_3", "road_2_16_3", "road_2_15_3", "road_2_14_3", "road_2_13_3", "road_2_12_3", "road_2_11_3", "road_2_10_2", "road_1_10_1", "road_1_11_2"], "interval": 1.0, "startTime": 655, "endTime": 655},
{"vehicle": {"length": 5.0, "width": 2.0, "maxPosAcc": 2.0, "maxNegAcc": 4.5, "usualPosAcc": 2.0, "usualNegAcc": 4.5, "minGap": 2.5, "maxSpeed": 11.111, "headwayTime": 2}, "route": ["road_4_12_2", "road_3_12_1", "road_3_13_1", "road_3_14_1", "road_3_15_1", "road_3_16_2", "road_2_16_1"], "interval": 1.0, "startTime": 659, "endTime": 659},
{"vehicle": {"length": 5.0, "width": 2.0, "maxPosAcc": 2.0, "maxNegAcc": 4.5, "usualPosAcc": 2.0, "usualNegAcc": 4.5, "minGap": 2.5, "maxSpeed": 11.111, "headwayTime": 2}, "route": ["road_4_14_2", "road_3_14_2", "road_2_14_3", "road_2_13_3", "road_2_12_3", "road_2_11_3", "road_2_10_3", "road_2_9_3", "road_2_8_3", "road_2_7_3", "road_2_6_3", "road_2_5_3", "road_2_4_2", "road_1_4_2"], "interval": 1.0, "startTime": 659, "endTime": 659},
{"vehicle": {"length": 5.0, "width": 2.0, "maxPosAcc": 2.0, "maxNegAcc": 4.5, "usualPosAcc": 2.0, "usualNegAcc": 4.5, "minGap": 2.5, "maxSpeed": 11.111, "headwayTime": 2}, "route": ["road_0_15_0", "road_1_15_0", "road_2_15_3", "road_2_14_3", "road_2_13_3", "road_2_12_3", "road_2_11_3", "road_2_10_3", "road_2_9_3", "road_2_8_3", "road_2_7_3", "road_2_6_2", "road_1_6_2"], "interval": 1.0, "startTime": 660, "endTime": 660},
{"vehicle": {"length": 5.0, "width": 2.0, "maxPosAcc": 2.0, "maxNegAcc": 4.5, "usualPosAcc": 2.0, "usualNegAcc": 4.5, "minGap": 2.5, "maxSpeed": 11.111, "headwayTime": 2}, "route": ["road_4_8_2", "road_3_8_1", "road_3_9_1", "road_3_10_1", "road_3_11_0"], "interval": 1.0, "startTime": 660, "endTime": 660},
{"vehicle": {"length": 5.0, "width": 2.0, "maxPosAcc": 2.0, "maxNegAcc": 4.5, "usualPosAcc": 2.0, "usualNegAcc": 4.5, "minGap": 2.5, "maxSpeed": 11.111, "headwayTime": 2}, "route": ["road_0_8_0", "road_1_8_1", "road_1_9_0", "road_2_9_0", "road_3_9_1", "road_3_10_1", "road_3_11_1", "road_3_12_1", "road_3_13_1", "road_3_14_0"], "interval": 1.0, "startTime": 660, "endTime": 660},
{"vehicle": {"length": 5.0, "width": 2.0, "maxPosAcc": 2.0, "maxNegAcc": 4.5, "usualPosAcc": 2.0, "usualNegAcc": 4.5, "minGap": 2.5, "maxSpeed": 11.111, "headwayTime": 2}, "route": ["road_3_0_1", "road_3_1_1", "road_3_2_1", "road_3_3_1", "road_3_4_1", "road_3_5_1", "road_3_6_1", "road_3_7_1", "road_3_8_1", "road_3_9_1", "road_3_10_1", "road_3_11_1", "road_3_12_1", "road_3_13_1", "road_3_14_0"], "interval": 1.0, "startTime": 660, "endTime": 660},
{"vehicle": {"length": 5.0, "width": 2.0, "maxPosAcc": 2.0, "maxNegAcc": 4.5, "usualPosAcc": 2.0, "usualNegAcc": 4.5, "minGap": 2.5, "maxSpeed": 11.111, "headwayTime": 2}, "route": ["road_4_3_2", "road_3_3_1", "road_3_4_2", "road_2_4_3", "road_2_3_3", "road_2_2_3", "road_2_1_0", "road_3_1_3"], "interval": 1.0, "startTime": 660, "endTime": 660},
{"vehicle": {"length": 5.0, "width": 2.0, "maxPosAcc": 2.0, "maxNegAcc": 4.5, "usualPosAcc": 2.0, "usualNegAcc": 4.5, "minGap": 2.5, "maxSpeed": 11.111, "headwayTime": 2}, "route": ["road_4_5_2", "road_3_5_1", "road_3_6_1", "road_3_7_1", "road_3_8_2", "road_2_8_2", "road_1_8_1", "road_1_9_1", "road_1_10_1", "road_1_11_1", "road_1_12_1", "road_1_13_2"], "interval": 1.0, "startTime": 660, "endTime": 660},
{"vehicle": {"length": 5.0, "width": 2.0, "maxPosAcc": 2.0, "maxNegAcc": 4.5, "usualPosAcc": 2.0, "usualNegAcc": 4.5, "minGap": 2.5, "maxSpeed": 11.111, "headwayTime": 2}, "route": ["road_4_6_2", "road_3_6_1", "road_3_7_1", "road_3_8_1", "road_3_9_1", "road_3_10_0"], "interval": 1.0, "startTime": 660, "endTime": 660},
{"vehicle": {"length": 5.0, "width": 2.0, "maxPosAcc": 2.0, "maxNegAcc": 4.5, "usualPosAcc": 2.0, "usualNegAcc": 4.5, "minGap": 2.5, "maxSpeed": 11.111, "headwayTime": 2}, "route": ["road_4_7_2", "road_3_7_1", "road_3_8_1", "road_3_9_1", "road_3_10_1", "road_3_11_1", "road_3_12_1", "road_3_13_0"], "interval": 1.0, "startTime": 660, "endTime": 660},
{"vehicle": {"length": 5.0, "width": 2.0, "maxPosAcc": 2.0, "maxNegAcc": 4.5, "usualPosAcc": 2.0, "usualNegAcc": 4.5, "minGap": 2.5, "maxSpeed": 11.111, "headwayTime": 2}, "route": ["road_4_9_2", "road_3_9_1", "road_3_10_1", "road_3_11_1", "road_3_12_1", "road_3_13_1", "road_3_14_0"], "interval": 1.0, "startTime": 660, "endTime": 660},
{"vehicle": {"length": 5.0, "width": 2.0, "maxPosAcc": 2.0, "maxNegAcc": 4.5, "usualPosAcc": 2.0, "usualNegAcc": 4.5, "minGap": 2.5, "maxSpeed": 11.111, "headwayTime": 2}, "route": ["road_4_10_2", "road_3_10_1", "road_3_11_1", "road_3_12_1", "road_3_13_1", "road_3_14_1", "road_3_15_1", "road_3_16_1"], "interval": 1.0, "startTime": 660, "endTime": 660},
{"vehicle": {"length": 5.0, "width": 2.0, "maxPosAcc": 2.0, "maxNegAcc": 4.5, "usualPosAcc": 2.0, "usualNegAcc": 4.5, "minGap": 2.5, "maxSpeed": 11.111, "headwayTime": 2}, "route": ["road_4_12_2", "road_3_12_1", "road_3_13_1", "road_3_14_1", "road_3_15_0"], "interval": 1.0, "startTime": 660, "endTime": 660},
{"vehicle": {"length": 5.0, "width": 2.0, "maxPosAcc": 2.0, "maxNegAcc": 4.5, "usualPosAcc": 2.0, "usualNegAcc": 4.5, "minGap": 2.5, "maxSpeed": 11.111, "headwayTime": 2}, "route": ["road_4_14_2", "road_3_14_2", "road_2_14_3", "road_2_13_3", "road_2_12_3", "road_2_11_3", "road_2_10_3", "road_2_9_3", "road_2_8_3", "road_2_7_3", "road_2_6_3", "road_2_5_3", "road_2_4_3", "road_2_3_3", "road_2_2_3", "road_2_1_3"], "interval": 1.0, "startTime": 660, "endTime": 660},
{"vehicle": {"length": 5.0, "width": 2.0, "maxPosAcc": 2.0, "maxNegAcc": 4.5, "usualPosAcc": 2.0, "usualNegAcc": 4.5, "minGap": 2.5, "maxSpeed": 11.111, "headwayTime": 2}, "route": ["road_3_17_3", "road_3_16_2", "road_2_16_3", "road_2_15_3", "road_2_14_3", "road_2_13_3", "road_2_12_3", "road_2_11_3", "road_2_10_3", "road_2_9_0", "road_3_9_0"], "interval": 1.0, "startTime": 660, "endTime": 660},
{"vehicle": {"length": 5.0, "width": 2.0, "maxPosAcc": 2.0, "maxNegAcc": 4.5, "usualPosAcc": 2.0, "usualNegAcc": 4.5, "minGap": 2.5, "maxSpeed": 11.111, "headwayTime": 2}, "route": ["road_1_0_1", "road_1_1_1", "road_1_2_1", "road_1_3_0", "road_2_3_0", "road_3_3_1", "road_3_4_1", "road_3_5_1", "road_3_6_1", "road_3_7_1", "road_3_8_1", "road_3_9_1", "road_3_10_1", "road_3_11_1", "road_3_12_1", "road_3_13_1", "road_3_14_1", "road_3_15_0"], "interval": 1.0, "startTime": 660, "endTime": 660},
{"vehicle": {"length": 5.0, "width": 2.0, "maxPosAcc": 2.0, "maxNegAcc": 4.5, "usualPosAcc": 2.0, "usualNegAcc": 4.5, "minGap": 2.5, "maxSpeed": 11.111, "headwayTime": 2}, "route": ["road_0_14_0", "road_1_14_1", "road_1_15_0", "road_2_15_3", "road_2_14_3", "road_2_13_3", "road_2_12_3", "road_2_11_3", "road_2_10_2", "road_1_10_2"], "interval": 1.0, "startTime": 660, "endTime": 660},
{"vehicle": {"length": 5.0, "width": 2.0, "maxPosAcc": 2.0, "maxNegAcc": 4.5, "usualPosAcc": 2.0, "usualNegAcc": 4.5, "minGap": 2.5, "maxSpeed": 11.111, "headwayTime": 2}, "route": ["road_0_7_0", "road_1_7_1", "road_1_8_1", "road_1_9_1", "road_1_10_1", "road_1_11_1", "road_1_12_1", "road_1_13_2"], "interval": 1.0, "startTime": 660, "endTime": 660},
{"vehicle": {"length": 5.0, "width": 2.0, "maxPosAcc": 2.0, "maxNegAcc": 4.5, "usualPosAcc": 2.0, "usualNegAcc": 4.5, "minGap": 2.5, "maxSpeed": 11.111, "headwayTime": 2}, "route": ["road_2_17_3", "road_2_16_0", "road_3_16_1"], "interval": 1.0, "startTime": 660, "endTime": 660},
{"vehicle": {"length": 5.0, "width": 2.0, "maxPosAcc": 2.0, "maxNegAcc": 4.5, "usualPosAcc": 2.0, "usualNegAcc": 4.5, "minGap": 2.5, "maxSpeed": 11.111, "headwayTime": 2}, "route": ["road_0_12_0", "road_1_12_1", "road_1_13_0", "road_2_13_3", "road_2_12_3", "road_2_11_3", "road_2_10_3", "road_2_9_3", "road_2_8_3", "road_2_7_3", "road_2_6_3", "road_2_5_0", "road_3_5_1", "road_3_6_0"], "interval": 1.0, "startTime": 660, "endTime": 660},
{"vehicle": {"length": 5.0, "width": 2.0, "maxPosAcc": 2.0, "maxNegAcc": 4.5, "usualPosAcc": 2.0, "usualNegAcc": 4.5, "minGap": 2.5, "maxSpeed": 11.111, "headwayTime": 2}, "route": ["road_0_13_0", "road_1_13_0", "road_2_13_3", "road_2_12_3", "road_2_11_3", "road_2_10_3", "road_2_9_3", "road_2_8_3", "road_2_7_3", "road_2_6_3", "road_2_5_3", "road_2_4_3", "road_2_3_3", "road_2_2_3", "road_2_1_3"], "interval": 1.0, "startTime": 660, "endTime": 660},
{"vehicle": {"length": 5.0, "width": 2.0, "maxPosAcc": 2.0, "maxNegAcc": 4.5, "usualPosAcc": 2.0, "usualNegAcc": 4.5, "minGap": 2.5, "maxSpeed": 11.111, "headwayTime": 2}, "route": ["road_0_10_0", "road_1_10_1", "road_1_11_1", "road_1_12_2"], "interval": 1.0, "startTime": 660, "endTime": 660},
{"vehicle": {"length": 5.0, "width": 2.0, "maxPosAcc": 2.0, "maxNegAcc": 4.5, "usualPosAcc": 2.0, "usualNegAcc": 4.5, "minGap": 2.5, "maxSpeed": 11.111, "headwayTime": 2}, "route": ["road_1_17_3", "road_1_16_0", "road_2_16_3", "road_2_15_3", "road_2_14_3", "road_2_13_3", "road_2_12_3", "road_2_11_3", "road_2_10_3", "road_2_9_3", "road_2_8_3", "road_2_7_3", "road_2_6_3", "road_2_5_3", "road_2_4_3", "road_2_3_3", "road_2_2_3", "road_2_1_0", "road_3_1_3"], "interval": 1.0, "startTime": 660, "endTime": 660},
{"vehicle": {"length": 5.0, "width": 2.0, "maxPosAcc": 2.0, "maxNegAcc": 4.5, "usualPosAcc": 2.0, "usualNegAcc": 4.5, "minGap": 2.5, "maxSpeed": 11.111, "headwayTime": 2}, "route": ["road_0_5_0", "road_1_5_0", "road_2_5_3", "road_2_4_3", "road_2_3_0", "road_3_3_0"], "interval": 1.0, "startTime": 660, "endTime": 660},
{"vehicle": {"length": 5.0, "width": 2.0, "maxPosAcc": 2.0, "maxNegAcc": 4.5, "usualPosAcc": 2.0, "usualNegAcc": 4.5, "minGap": 2.5, "maxSpeed": 11.111, "headwayTime": 2}, "route": ["road_4_8_2", "road_3_8_1", "road_3_9_1", "road_3_10_1", "road_3_11_1", "road_3_12_1", "road_3_13_0"], "interval": 1.0, "startTime": 664, "endTime": 664},
{"vehicle": {"length": 5.0, "width": 2.0, "maxPosAcc": 2.0, "maxNegAcc": 4.5, "usualPosAcc": 2.0, "usualNegAcc": 4.5, "minGap": 2.5, "maxSpeed": 11.111, "headwayTime": 2}, "route": ["road_4_12_2", "road_3_12_1", "road_3_13_1", "road_3_14_1", "road_3_15_1", "road_3_16_1"], "interval": 1.0, "startTime": 668, "endTime": 668},
{"vehicle": {"length": 5.0, "width": 2.0, "maxPosAcc": 2.0, "maxNegAcc": 4.5, "usualPosAcc": 2.0, "usualNegAcc": 4.5, "minGap": 2.5, "maxSpeed": 11.111, "headwayTime": 2}, "route": ["road_2_0_1", "road_2_1_0", "road_3_1_1", "road_3_2_1", "road_3_3_1", "road_3_4_1", "road_3_5_1", "road_3_6_0"], "interval": 1.0, "startTime": 668, "endTime": 668},
{"vehicle": {"length": 5.0, "width": 2.0, "maxPosAcc": 2.0, "maxNegAcc": 4.5, "usualPosAcc": 2.0, "usualNegAcc": 4.5, "minGap": 2.5, "maxSpeed": 11.111, "headwayTime": 2}, "route": ["road_1_17_3", "road_1_16_0", "road_2_16_1"], "interval": 1.0, "startTime": 668, "endTime": 668},
{"vehicle": {"length": 5.0, "width": 2.0, "maxPosAcc": 2.0, "maxNegAcc": 4.5, "usualPosAcc": 2.0, "usualNegAcc": 4.5, "minGap": 2.5, "maxSpeed": 11.111, "headwayTime": 2}, "route": ["road_0_2_0", "road_1_2_1", "road_1_3_0", "road_2_3_0", "road_3_3_1", "road_3_4_1", "road_3_5_1", "road_3_6_1", "road_3_7_1", "road_3_8_1", "road_3_9_1", "road_3_10_1", "road_3_11_1", "road_3_12_1", "road_3_13_1", "road_3_14_0"], "interval": 1.0, "startTime": 669, "endTime": 669},
{"vehicle": {"length": 5.0, "width": 2.0, "maxPosAcc": 2.0, "maxNegAcc": 4.5, "usualPosAcc": 2.0, "usualNegAcc": 4.5, "minGap": 2.5, "maxSpeed": 11.111, "headwayTime": 2}, "route": ["road_4_3_2", "road_3_3_1", "road_3_4_1", "road_3_5_1", "road_3_6_1", "road_3_7_1", "road_3_8_1", "road_3_9_1", "road_3_10_1", "road_3_11_1", "road_3_12_1", "road_3_13_1", "road_3_14_1", "road_3_15_0"], "interval": 1.0, "startTime": 672, "endTime": 672},
{"vehicle": {"length": 5.0, "width": 2.0, "maxPosAcc": 2.0, "maxNegAcc": 4.5, "usualPosAcc": 2.0, "usualNegAcc": 4.5, "minGap": 2.5, "maxSpeed": 11.111, "headwayTime": 2}, "route": ["road_4_5_2", "road_3_5_1", "road_3_6_1", "road_3_7_1", "road_3_8_0"], "interval": 1.0, "startTime": 672, "endTime": 672},
{"vehicle": {"length": 5.0, "width": 2.0, "maxPosAcc": 2.0, "maxNegAcc": 4.5, "usualPosAcc": 2.0, "usualNegAcc": 4.5, "minGap": 2.5, "maxSpeed": 11.111, "headwayTime": 2}, "route": ["road_0_12_0", "road_1_12_1", "road_1_13_1", "road_1_14_1", "road_1_15_1", "road_1_16_1"], "interval": 1.0, "startTime": 672, "endTime": 672},
{"vehicle": {"length": 5.0, "width": 2.0, "maxPosAcc": 2.0, "maxNegAcc": 4.5, "usualPosAcc": 2.0, "usualNegAcc": 4.5, "minGap": 2.5, "maxSpeed": 11.111, "headwayTime": 2}, "route": ["road_3_0_1", "road_3_1_1", "road_3_2_1", "road_3_3_1", "road_3_4_1", "road_3_5_1", "road_3_6_1", "road_3_7_1", "road_3_8_0"], "interval": 1.0, "startTime": 673, "endTime": 673},
{"vehicle": {"length": 5.0, "width": 2.0, "maxPosAcc": 2.0, "maxNegAcc": 4.5, "usualPosAcc": 2.0, "usualNegAcc": 4.5, "minGap": 2.5, "maxSpeed": 11.111, "headwayTime": 2}, "route": ["road_4_6_2", "road_3_6_1", "road_3_7_1", "road_3_8_1", "road_3_9_1", "road_3_10_1", "road_3_11_1", "road_3_12_0"], "interval": 1.0, "startTime": 673, "endTime": 673},
{"vehicle": {"length": 5.0, "width": 2.0, "maxPosAcc": 2.0, "maxNegAcc": 4.5, "usualPosAcc": 2.0, "usualNegAcc": 4.5, "minGap": 2.5, "maxSpeed": 11.111, "headwayTime": 2}, "route": ["road_0_3_0", "road_1_3_0", "road_2_3_0", "road_3_3_1", "road_3_4_1", "road_3_5_1", "road_3_6_1", "road_3_7_1", "road_3_8_0"], "interval": 1.0, "startTime": 676, "endTime": 676},
{"vehicle": {"length": 5.0, "width": 2.0, "maxPosAcc": 2.0, "maxNegAcc": 4.5, "usualPosAcc": 2.0, "usualNegAcc": 4.5, "minGap": 2.5, "maxSpeed": 11.111, "headwayTime": 2}, "route": ["road_1_17_3", "road_1_16_0", "road_2_16_3", "road_2_15_3", "road_2_14_3", "road_2_13_3", "road_2_12_3", "road_2_11_3", "road_2_10_3", "road_2_9_3", "road_2_8_3", "road_2_7_3", "road_2_6_3", "road_2_5_3", "road_2_4_3", "road_2_3_3", "road_2_2_3", "road_2_1_0", "road_3_1_3"], "interval": 1.0, "startTime": 681, "endTime": 681},
{"vehicle": {"length": 5.0, "width": 2.0, "maxPosAcc": 2.0, "maxNegAcc": 4.5, "usualPosAcc": 2.0, "usualNegAcc": 4.5, "minGap": 2.5, "maxSpeed": 11.111, "headwayTime": 2}, "route": ["road_2_0_1", "road_2_1_0", "road_3_1_3"], "interval": 1.0, "startTime": 682, "endTime": 682},
{"vehicle": {"length": 5.0, "width": 2.0, "maxPosAcc": 2.0, "maxNegAcc": 4.5, "usualPosAcc": 2.0, "usualNegAcc": 4.5, "minGap": 2.5, "maxSpeed": 11.111, "headwayTime": 2}, "route": ["road_4_10_2", "road_3_10_1", "road_3_11_1", "road_3_12_1", "road_3_13_1", "road_3_14_2", "road_2_14_2", "road_1_14_1", "road_1_15_2"], "interval": 1.0, "startTime": 683, "endTime": 683},
{"vehicle": {"length": 5.0, "width": 2.0, "maxPosAcc": 2.0, "maxNegAcc": 4.5, "usualPosAcc": 2.0, "usualNegAcc": 4.5, "minGap": 2.5, "maxSpeed": 11.111, "headwayTime": 2}, "route": ["road_1_17_3", "road_1_16_0", "road_2_16_3", "road_2_15_3", "road_2_14_3", "road_2_13_3", "road_2_12_3", "road_2_11_3", "road_2_10_3", "road_2_9_3", "road_2_8_3", "road_2_7_3", "road_2_6_3", "road_2_5_0", "road_3_5_1", "road_3_6_0"], "interval": 1.0, "startTime": 683, "endTime": 683},
{"vehicle": {"length": 5.0, "width": 2.0, "maxPosAcc": 2.0, "maxNegAcc": 4.5, "usualPosAcc": 2.0, "usualNegAcc": 4.5, "minGap": 2.5, "maxSpeed": 11.111, "headwayTime": 2}, "route": ["road_4_9_2", "road_3_9_1", "road_3_10_1", "road_3_11_0"], "interval": 1.0, "startTime": 684, "endTime": 684},
{"vehicle": {"length": 5.0, "width": 2.0, "maxPosAcc": 2.0, "maxNegAcc": 4.5, "usualPosAcc": 2.0, "usualNegAcc": 4.5, "minGap": 2.5, "maxSpeed": 11.111, "headwayTime": 2}, "route": ["road_3_0_1", "road_3_1_1", "road_3_2_1", "road_3_3_1", "road_3_4_2", "road_2_4_2", "road_1_4_2"], "interval": 1.0, "startTime": 685, "endTime": 685},
{"vehicle": {"length": 5.0, "width": 2.0, "maxPosAcc": 2.0, "maxNegAcc": 4.5, "usualPosAcc": 2.0, "usualNegAcc": 4.5, "minGap": 2.5, "maxSpeed": 11.111, "headwayTime": 2}, "route": ["road_4_9_2", "road_3_9_1", "road_3_10_2", "road_2_10_3", "road_2_9_3", "road_2_8_3", "road_2_7_3", "road_2_6_3", "road_2_5_3", "road_2_4_3", "road_2_3_3", "road_2_2_3", "road_2_1_0", "road_3_1_1", "road_3_2_0"], "interval": 1.0, "startTime": 686, "endTime": 686},
{"vehicle": {"length": 5.0, "width": 2.0, "maxPosAcc": 2.0, "maxNegAcc": 4.5, "usualPosAcc": 2.0, "usualNegAcc": 4.5, "minGap": 2.5, "maxSpeed": 11.111, "headwayTime": 2}, "route": ["road_3_0_1", "road_3_1_1", "road_3_2_1", "road_3_3_1", "road_3_4_1", "road_3_5_1", "road_3_6_1", "road_3_7_1", "road_3_8_1", "road_3_9_1", "road_3_10_1", "road_3_11_1", "road_3_12_1", "road_3_13_1", "road_3_14_1", "road_3_15_1", "road_3_16_1"], "interval": 1.0, "startTime": 687, "endTime": 687},
{"vehicle": {"length": 5.0, "width": 2.0, "maxPosAcc": 2.0, "maxNegAcc": 4.5, "usualPosAcc": 2.0, "usualNegAcc": 4.5, "minGap": 2.5, "maxSpeed": 11.111, "headwayTime": 2}, "route": ["road_4_10_2", "road_3_10_2", "road_2_10_2", "road_1_10_2"], "interval": 1.0, "startTime": 690, "endTime": 690},
{"vehicle": {"length": 5.0, "width": 2.0, "maxPosAcc": 2.0, "maxNegAcc": 4.5, "usualPosAcc": 2.0, "usualNegAcc": 4.5, "minGap": 2.5, "maxSpeed": 11.111, "headwayTime": 2}, "route": ["road_3_0_1", "road_3_1_1", "road_3_2_1", "road_3_3_1", "road_3_4_1", "road_3_5_1", "road_3_6_1", "road_3_7_0"], "interval": 1.0, "startTime": 699, "endTime": 699},
{"vehicle": {"length": 5.0, "width": 2.0, "maxPosAcc": 2.0, "maxNegAcc": 4.5, "usualPosAcc": 2.0, "usualNegAcc": 4.5, "minGap": 2.5, "maxSpeed": 11.111, "headwayTime": 2}, "route": ["road_3_0_1", "road_3_1_1", "road_3_2_1", "road_3_3_1", "road_3_4_1", "road_3_5_1", "road_3_6_1", "road_3_7_1", "road_3_8_1", "road_3_9_1", "road_3_10_1", "road_3_11_1", "road_3_12_1", "road_3_13_1", "road_3_14_1", "road_3_15_1", "road_3_16_1"], "interval": 1.0, "startTime": 700, "endTime": 700},
{"vehicle": {"length": 5.0, "width": 2.0, "maxPosAcc": 2.0, "maxNegAcc": 4.5, "usualPosAcc": 2.0, "usualNegAcc": 4.5, "minGap": 2.5, "maxSpeed": 11.111, "headwayTime": 2}, "route": ["road_4_4_2", "road_3_4_2", "road_2_4_2", "road_1_4_1", "road_1_5_2"], "interval": 1.0, "startTime": 702, "endTime": 702},
{"vehicle": {"length": 5.0, "width": 2.0, "maxPosAcc": 2.0, "maxNegAcc": 4.5, "usualPosAcc": 2.0, "usualNegAcc": 4.5, "minGap": 2.5, "maxSpeed": 11.111, "headwayTime": 2}, "route": ["road_4_5_2", "road_3_5_1", "road_3_6_2", "road_2_6_3", "road_2_5_3", "road_2_4_3", "road_2_3_3", "road_2_2_3", "road_2_1_0", "road_3_1_3"], "interval": 1.0, "startTime": 702, "endTime": 702},
{"vehicle": {"length": 5.0, "width": 2.0, "maxPosAcc": 2.0, "maxNegAcc": 4.5, "usualPosAcc": 2.0, "usualNegAcc": 4.5, "minGap": 2.5, "maxSpeed": 11.111, "headwayTime": 2}, "route": ["road_4_5_2", "road_3_5_1", "road_3_6_1", "road_3_7_1", "road_3_8_0"], "interval": 1.0, "startTime": 710, "endTime": 710},
{"vehicle": {"length": 5.0, "width": 2.0, "maxPosAcc": 2.0, "maxNegAcc": 4.5, "usualPosAcc": 2.0, "usualNegAcc": 4.5, "minGap": 2.5, "maxSpeed": 11.111, "headwayTime": 2}, "route": ["road_4_9_2", "road_3_9_1", "road_3_10_1", "road_3_11_1", "road_3_12_1", "road_3_13_1", "road_3_14_1", "road_3_15_1", "road_3_16_1"], "interval": 1.0, "startTime": 710, "endTime": 710},
{"vehicle": {"length": 5.0, "width": 2.0, "maxPosAcc": 2.0, "maxNegAcc": 4.5, "usualPosAcc": 2.0, "usualNegAcc": 4.5, "minGap": 2.5, "maxSpeed": 11.111, "headwayTime": 2}, "route": ["road_4_13_2", "road_3_13_1", "road_3_14_2", "road_2_14_2", "road_1_14_1", "road_1_15_2"], "interval": 1.0, "startTime": 710, "endTime": 710},
{"vehicle": {"length": 5.0, "width": 2.0, "maxPosAcc": 2.0, "maxNegAcc": 4.5, "usualPosAcc": 2.0, "usualNegAcc": 4.5, "minGap": 2.5, "maxSpeed": 11.111, "headwayTime": 2}, "route": ["road_0_15_0", "road_1_15_0", "road_2_15_3", "road_2_14_3", "road_2_13_3", "road_2_12_3", "road_2_11_3", "road_2_10_3", "road_2_9_3", "road_2_8_2", "road_1_8_1", "road_1_9_2"], "interval": 1.0, "startTime": 713, "endTime": 713},
{"vehicle": {"length": 5.0, "width": 2.0, "maxPosAcc": 2.0, "maxNegAcc": 4.5, "usualPosAcc": 2.0, "usualNegAcc": 4.5, "minGap": 2.5, "maxSpeed": 11.111, "headwayTime": 2}, "route": ["road_4_10_2", "road_3_10_2", "road_2_10_3", "road_2_9_3", "road_2_8_2", "road_1_8_2"], "interval": 1.0, "startTime": 713, "endTime": 713},
{"vehicle": {"length": 5.0, "width": 2.0, "maxPosAcc": 2.0, "maxNegAcc": 4.5, "usualPosAcc": 2.0, "usualNegAcc": 4.5, "minGap": 2.5, "maxSpeed": 11.111, "headwayTime": 2}, "route": ["road_4_13_2", "road_3_13_1", "road_3_14_2", "road_2_14_3", "road_2_13_3", "road_2_12_3", "road_2_11_3", "road_2_10_3", "road_2_9_3", "road_2_8_3", "road_2_7_3", "road_2_6_3", "road_2_5_3", "road_2_4_3", "road_2_3_0", "road_3_3_1", "road_3_4_0"], "interval": 1.0, "startTime": 713, "endTime": 713},
{"vehicle": {"length": 5.0, "width": 2.0, "maxPosAcc": 2.0, "maxNegAcc": 4.5, "usualPosAcc": 2.0, "usualNegAcc": 4.5, "minGap": 2.5, "maxSpeed": 11.111, "headwayTime": 2}, "route": ["road_0_6_0", "road_1_6_1", "road_1_7_0", "road_2_7_3", "road_2_6_3", "road_2_5_3", "road_2_4_3", "road_2_3_3", "road_2_2_2", "road_1_2_1", "road_1_3_2"], "interval": 1.0, "startTime": 715, "endTime": 715},
{"vehicle": {"length": 5.0, "width": 2.0, "maxPosAcc": 2.0, "maxNegAcc": 4.5, "usualPosAcc": 2.0, "usualNegAcc": 4.5, "minGap": 2.5, "maxSpeed": 11.111, "headwayTime": 2}, "route": ["road_4_8_2", "road_3_8_2", "road_2_8_3", "road_2_7_3", "road_2_6_3", "road_2_5_3", "road_2_4_3", "road_2_3_3", "road_2_2_2", "road_1_2_2"], "interval": 1.0, "startTime": 717, "endTime": 717},
{"vehicle": {"length": 5.0, "width": 2.0, "maxPosAcc": 2.0, "maxNegAcc": 4.5, "usualPosAcc": 2.0, "usualNegAcc": 4.5, "minGap": 2.5, "maxSpeed": 11.111, "headwayTime": 2}, "route": ["road_4_15_2", "road_3_15_1", "road_3_16_2", "road_2_16_3", "road_2_15_3", "road_2_14_3", "road_2_13_3", "road_2_12_3", "road_2_11_3", "road_2_10_2", "road_1_10_1", "road_1_11_2"], "interval": 1.0, "startTime": 720, "endTime": 720},
{"vehicle": {"length": 5.0, "width": 2.0, "maxPosAcc": 2.0, "maxNegAcc": 4.5, "usualPosAcc": 2.0, "usualNegAcc": 4.5, "minGap": 2.5, "maxSpeed": 11.111, "headwayTime": 2}, "route": ["road_4_4_2", "road_3_4_1", "road_3_5_1", "road_3_6_2", "road_2_6_2", "road_1_6_1", "road_1_7_2"], "interval": 1.0, "startTime": 720, "endTime": 720},
{"vehicle": {"length": 5.0, "width": 2.0, "maxPosAcc": 2.0, "maxNegAcc": 4.5, "usualPosAcc": 2.0, "usualNegAcc": 4.5, "minGap": 2.5, "maxSpeed": 11.111, "headwayTime": 2}, "route": ["road_0_4_0", "road_1_4_1", "road_1_5_0", "road_2_5_3", "road_2_4_3", "road_2_3_0", "road_3_3_0"], "interval": 1.0, "startTime": 720, "endTime": 720},
{"vehicle": {"length": 5.0, "width": 2.0, "maxPosAcc": 2.0, "maxNegAcc": 4.5, "usualPosAcc": 2.0, "usualNegAcc": 4.5, "minGap": 2.5, "maxSpeed": 11.111, "headwayTime": 2}, "route": ["road_3_0_1", "road_3_1_1", "road_3_2_1", "road_3_3_1", "road_3_4_1", "road_3_5_1", "road_3_6_1", "road_3_7_0"], "interval": 1.0, "startTime": 720, "endTime": 720},
{"vehicle": {"length": 5.0, "width": 2.0, "maxPosAcc": 2.0, "maxNegAcc": 4.5, "usualPosAcc": 2.0, "usualNegAcc": 4.5, "minGap": 2.5, "maxSpeed": 11.111, "headwayTime": 2}, "route": ["road_4_7_2", "road_3_7_1", "road_3_8_2", "road_2_8_3", "road_2_7_3", "road_2_6_3", "road_2_5_3", "road_2_4_3", "road_2_3_3", "road_2_2_3", "road_2_1_2", "road_1_1_3"], "interval": 1.0, "startTime": 720, "endTime": 720},
{"vehicle": {"length": 5.0, "width": 2.0, "maxPosAcc": 2.0, "maxNegAcc": 4.5, "usualPosAcc": 2.0, "usualNegAcc": 4.5, "minGap": 2.5, "maxSpeed": 11.111, "headwayTime": 2}, "route": ["road_4_11_2", "road_3_11_1", "road_3_12_2", "road_2_12_3", "road_2_11_3", "road_2_10_3", "road_2_9_3", "road_2_8_3", "road_2_7_3", "road_2_6_3", "road_2_5_3", "road_2_4_3", "road_2_3_0", "road_3_3_0"], "interval": 1.0, "startTime": 720, "endTime": 720},
{"vehicle": {"length": 5.0, "width": 2.0, "maxPosAcc": 2.0, "maxNegAcc": 4.5, "usualPosAcc": 2.0, "usualNegAcc": 4.5, "minGap": 2.5, "maxSpeed": 11.111, "headwayTime": 2}, "route": ["road_4_12_2", "road_3_12_2", "road_2_12_3", "road_2_11_0", "road_3_11_0"], "interval": 1.0, "startTime": 720, "endTime": 720},
{"vehicle": {"length": 5.0, "width": 2.0, "maxPosAcc": 2.0, "maxNegAcc": 4.5, "usualPosAcc": 2.0, "usualNegAcc": 4.5, "minGap": 2.5, "maxSpeed": 11.111, "headwayTime": 2}, "route": ["road_4_13_2", "road_3_13_1", "road_3_14_2", "road_2_14_3", "road_2_13_3", "road_2_12_3", "road_2_11_3", "road_2_10_3", "road_2_9_3", "road_2_8_3", "road_2_7_3", "road_2_6_3", "road_2_5_3", "road_2_4_3", "road_2_3_3", "road_2_2_2", "road_1_2_1", "road_1_3_2"], "interval": 1.0, "startTime": 720, "endTime": 720},
{"vehicle": {"length": 5.0, "width": 2.0, "maxPosAcc": 2.0, "maxNegAcc": 4.5, "usualPosAcc": 2.0, "usualNegAcc": 4.5, "minGap": 2.5, "maxSpeed": 11.111, "headwayTime": 2}, "route": ["road_4_14_2", "road_3_14_2", "road_2_14_2", "road_1_14_1", "road_1_15_1", "road_1_16_1"], "interval": 1.0, "startTime": 720, "endTime": 720},
{"vehicle": {"length": 5.0, "width": 2.0, "maxPosAcc": 2.0, "maxNegAcc": 4.5, "usualPosAcc": 2.0, "usualNegAcc": 4.5, "minGap": 2.5, "maxSpeed": 11.111, "headwayTime": 2}, "route": ["road_2_0_1", "road_2_1_0", "road_3_1_1", "road_3_2_1", "road_3_3_1", "road_3_4_1", "road_3_5_1", "road_3_6_1", "road_3_7_1", "road_3_8_1", "road_3_9_1", "road_3_10_1", "road_3_11_1", "road_3_12_1", "road_3_13_1", "road_3_14_1", "road_3_15_1", "road_3_16_2", "road_2_16_1"], "interval": 1.0, "startTime": 720, "endTime": 720},
{"vehicle": {"length": 5.0, "width": 2.0, "maxPosAcc": 2.0, "maxNegAcc": 4.5, "usualPosAcc": 2.0, "usualNegAcc": 4.5, "minGap": 2.5, "maxSpeed": 11.111, "headwayTime": 2}, "route": ["road_1_0_1", "road_1_1_1", "road_1_2_1", "road_1_3_0", "road_2_3_0", "road_3_3_1", "road_3_4_1", "road_3_5_1", "road_3_6_1", "road_3_7_1", "road_3_8_1", "road_3_9_1", "road_3_10_1", "road_3_11_1", "road_3_12_1", "road_3_13_0"], "interval": 1.0, "startTime": 720, "endTime": 720},
{"vehicle": {"length": 5.0, "width": 2.0, "maxPosAcc": 2.0, "maxNegAcc": 4.5, "usualPosAcc": 2.0, "usualNegAcc": 4.5, "minGap": 2.5, "maxSpeed": 11.111, "headwayTime": 2}, "route": ["road_0_14_0", "road_1_14_1", "road_1_15_0", "road_2_15_3", "road_2_14_3", "road_2_13_3", "road_2_12_3", "road_2_11_3", "road_2_10_3", "road_2_9_3", "road_2_8_3", "road_2_7_3", "road_2_6_3", "road_2_5_3", "road_2_4_3", "road_2_3_3", "road_2_2_3", "road_2_1_3"], "interval": 1.0, "startTime": 720, "endTime": 720},
{"vehicle": {"length": 5.0, "width": 2.0, "maxPosAcc": 2.0, "maxNegAcc": 4.5, "usualPosAcc": 2.0, "usualNegAcc": 4.5, "minGap": 2.5, "maxSpeed": 11.111, "headwayTime": 2}, "route": ["road_2_17_3", "road_2_16_2", "road_1_16_1"], "interval": 1.0, "startTime": 720, "endTime": 720},
{"vehicle": {"length": 5.0, "width": 2.0, "maxPosAcc": 2.0, "maxNegAcc": 4.5, "usualPosAcc": 2.0, "usualNegAcc": 4.5, "minGap": 2.5, "maxSpeed": 11.111, "headwayTime": 2}, "route": ["road_0_12_0", "road_1_12_1", "road_1_13_0", "road_2_13_0", "road_3_13_0"], "interval": 1.0, "startTime": 720, "endTime": 720},
{"vehicle": {"length": 5.0, "width": 2.0, "maxPosAcc": 2.0, "maxNegAcc": 4.5, "usualPosAcc": 2.0, "usualNegAcc": 4.5, "minGap": 2.5, "maxSpeed": 11.111, "headwayTime": 2}, "route": ["road_0_13_0", "road_1_13_0", "road_2_13_3", "road_2_12_3", "road_2_11_3", "road_2_10_3", "road_2_9_3", "road_2_8_3", "road_2_7_3", "road_2_6_2", "road_1_6_1", "road_1_7_2"], "interval": 1.0, "startTime": 720, "endTime": 720},
{"vehicle": {"length": 5.0, "width": 2.0, "maxPosAcc": 2.0, "maxNegAcc": 4.5, "usualPosAcc": 2.0, "usualNegAcc": 4.5, "minGap": 2.5, "maxSpeed": 11.111, "headwayTime": 2}, "route": ["road_0_5_0", "road_1_5_0", "road_2_5_0", "road_3_5_1", "road_3_6_1", "road_3_7_1", "road_3_8_1", "road_3_9_1", "road_3_10_0"], "interval": 1.0, "startTime": 720, "endTime": 720},
{"vehicle": {"length": 5.0, "width": 2.0, "maxPosAcc": 2.0, "maxNegAcc": 4.5, "usualPosAcc": 2.0, "usualNegAcc": 4.5, "minGap": 2.5, "maxSpeed": 11.111, "headwayTime": 2}, "route": ["road_4_2_2", "road_3_2_1", "road_3_3_1", "road_3_4_2", "road_2_4_2", "road_1_4_1", "road_1_5_1", "road_1_6_1", "road_1_7_1", "road_1_8_1", "road_1_9_1", "road_1_10_1", "road_1_11_1", "road_1_12_1", "road_1_13_1", "road_1_14_1", "road_1_15_2"], "interval": 1.0, "startTime": 720, "endTime": 720},
{"vehicle": {"length": 5.0, "width": 2.0, "maxPosAcc": 2.0, "maxNegAcc": 4.5, "usualPosAcc": 2.0, "usualNegAcc": 4.5, "minGap": 2.5, "maxSpeed": 11.111, "headwayTime": 2}, "route": ["road_1_0_1", "road_1_1_0", "road_2_1_0", "road_3_1_1", "road_3_2_0"], "interval": 1.0, "startTime": 721, "endTime": 721},
{"vehicle": {"length": 5.0, "width": 2.0, "maxPosAcc": 2.0, "maxNegAcc": 4.5, "usualPosAcc": 2.0, "usualNegAcc": 4.5, "minGap": 2.5, "maxSpeed": 11.111, "headwayTime": 2}, "route": ["road_0_9_0", "road_1_9_0", "road_2_9_0", "road_3_9_1", "road_3_10_0"], "interval": 1.0, "startTime": 722, "endTime": 722},
{"vehicle": {"length": 5.0, "width": 2.0, "maxPosAcc": 2.0, "maxNegAcc": 4.5, "usualPosAcc": 2.0, "usualNegAcc": 4.5, "minGap": 2.5, "maxSpeed": 11.111, "headwayTime": 2}, "route": ["road_4_15_2", "road_3_15_1", "road_3_16_2", "road_2_16_2", "road_1_16_1"], "interval": 1.0, "startTime": 723, "endTime": 723},
{"vehicle": {"length": 5.0, "width": 2.0, "maxPosAcc": 2.0, "maxNegAcc": 4.5, "usualPosAcc": 2.0, "usualNegAcc": 4.5, "minGap": 2.5, "maxSpeed": 11.111, "headwayTime": 2}, "route": ["road_0_15_0", "road_1_15_0", "road_2_15_3", "road_2_14_3", "road_2_13_3", "road_2_12_3", "road_2_11_3", "road_2_10_3", "road_2_9_3", "road_2_8_3", "road_2_7_3", "road_2_6_3", "road_2_5_0", "road_3_5_0"], "interval": 1.0, "startTime": 725, "endTime": 725},
{"vehicle": {"length": 5.0, "width": 2.0, "maxPosAcc": 2.0, "maxNegAcc": 4.5, "usualPosAcc": 2.0, "usualNegAcc": 4.5, "minGap": 2.5, "maxSpeed": 11.111, "headwayTime": 2}, "route": ["road_3_17_3", "road_3_16_2", "road_2_16_1"], "interval": 1.0, "startTime": 725, "endTime": 725},
{"vehicle": {"length": 5.0, "width": 2.0, "maxPosAcc": 2.0, "maxNegAcc": 4.5, "usualPosAcc": 2.0, "usualNegAcc": 4.5, "minGap": 2.5, "maxSpeed": 11.111, "headwayTime": 2}, "route": ["road_0_3_0", "road_1_3_0", "road_2_3_0", "road_3_3_1", "road_3_4_1", "road_3_5_1", "road_3_6_1", "road_3_7_1", "road_3_8_1", "road_3_9_1", "road_3_10_1", "road_3_11_1", "road_3_12_1", "road_3_13_0"], "interval": 1.0, "startTime": 732, "endTime": 732},
{"vehicle": {"length": 5.0, "width": 2.0, "maxPosAcc": 2.0, "maxNegAcc": 4.5, "usualPosAcc": 2.0, "usualNegAcc": 4.5, "minGap": 2.5, "maxSpeed": 11.111, "headwayTime": 2}, "route": ["road_0_11_0", "road_1_11_0", "road_2_11_0", "road_3_11_1", "road_3_12_0"], "interval": 1.0, "startTime": 732, "endTime": 732},
{"vehicle": {"length": 5.0, "width": 2.0, "maxPosAcc": 2.0, "maxNegAcc": 4.5, "usualPosAcc": 2.0, "usualNegAcc": 4.5, "minGap": 2.5, "maxSpeed": 11.111, "headwayTime": 2}, "route": ["road_4_10_2", "road_3_10_1", "road_3_11_0"], "interval": 1.0, "startTime": 733, "endTime": 733},
{"vehicle": {"length": 5.0, "width": 2.0, "maxPosAcc": 2.0, "maxNegAcc": 4.5, "usualPosAcc": 2.0, "usualNegAcc": 4.5, "minGap": 2.5, "maxSpeed": 11.111, "headwayTime": 2}, "route": ["road_0_2_0", "road_1_2_1", "road_1_3_1", "road_1_4_1", "road_1_5_1", "road_1_6_1", "road_1_7_1", "road_1_8_2"], "interval": 1.0, "startTime": 738, "endTime": 738},
{"vehicle": {"length": 5.0, "width": 2.0, "maxPosAcc": 2.0, "maxNegAcc": 4.5, "usualPosAcc": 2.0, "usualNegAcc": 4.5, "minGap": 2.5, "maxSpeed": 11.111, "headwayTime": 2}, "route": ["road_4_3_2", "road_3_3_1", "road_3_4_1", "road_3_5_1", "road_3_6_1", "road_3_7_1", "road_3_8_1", "road_3_9_1", "road_3_10_1", "road_3_11_1", "road_3_12_0"], "interval": 1.0, "startTime": 743, "endTime": 743},
{"vehicle": {"length": 5.0, "width": 2.0, "maxPosAcc": 2.0, "maxNegAcc": 4.5, "usualPosAcc": 2.0, "usualNegAcc": 4.5, "minGap": 2.5, "maxSpeed": 11.111, "headwayTime": 2}, "route": ["road_2_0_1", "road_2_1_0", "road_3_1_1", "road_3_2_0"], "interval": 1.0, "startTime": 748, "endTime": 748},
{"vehicle": {"length": 5.0, "width": 2.0, "maxPosAcc": 2.0, "maxNegAcc": 4.5, "usualPosAcc": 2.0, "usualNegAcc": 4.5, "minGap": 2.5, "maxSpeed": 11.111, "headwayTime": 2}, "route": ["road_3_17_3", "road_3_16_2", "road_2_16_3", "road_2_15_3", "road_2_14_3", "road_2_13_0", "road_3_13_0"], "interval": 1.0, "startTime": 750, "endTime": 750},
{"vehicle": {"length": 5.0, "width": 2.0, "maxPosAcc": 2.0, "maxNegAcc": 4.5, "usualPosAcc": 2.0, "usualNegAcc": 4.5, "minGap": 2.5, "maxSpeed": 11.111, "headwayTime": 2}, "route": ["road_2_17_3", "road_2_16_3", "road_2_15_3", "road_2_14_3", "road_2_13_3", "road_2_12_3", "road_2_11_3", "road_2_10_3", "road_2_9_0", "road_3_9_0"], "interval": 1.0, "startTime": 754, "endTime": 754},
{"vehicle": {"length": 5.0, "width": 2.0, "maxPosAcc": 2.0, "maxNegAcc": 4.5, "usualPosAcc": 2.0, "usualNegAcc": 4.5, "minGap": 2.5, "maxSpeed": 11.111, "headwayTime": 2}, "route": ["road_0_5_0", "road_1_5_0", "road_2_5_3", "road_2_4_3", "road_2_3_3", "road_2_2_3", "road_2_1_0", "road_3_1_1", "road_3_2_0"], "interval": 1.0, "startTime": 754, "endTime": 754},
{"vehicle": {"length": 5.0, "width": 2.0, "maxPosAcc": 2.0, "maxNegAcc": 4.5, "usualPosAcc": 2.0, "usualNegAcc": 4.5, "minGap": 2.5, "maxSpeed": 11.111, "headwayTime": 2}, "route": ["road_0_15_0", "road_1_15_1", "road_1_16_1"], "interval": 1.0, "startTime": 757, "endTime": 757},
{"vehicle": {"length": 5.0, "width": 2.0, "maxPosAcc": 2.0, "maxNegAcc": 4.5, "usualPosAcc": 2.0, "usualNegAcc": 4.5, "minGap": 2.5, "maxSpeed": 11.111, "headwayTime": 2}, "route": ["road_3_0_1", "road_3_1_1", "road_3_2_1", "road_3_3_1", "road_3_4_1", "road_3_5_0"], "interval": 1.0, "startTime": 757, "endTime": 757},
{"vehicle": {"length": 5.0, "width": 2.0, "maxPosAcc": 2.0, "maxNegAcc": 4.5, "usualPosAcc": 2.0, "usualNegAcc": 4.5, "minGap": 2.5, "maxSpeed": 11.111, "headwayTime": 2}, "route": ["road_0_12_0", "road_1_12_1", "road_1_13_0", "road_2_13_3", "road_2_12_3", "road_2_11_3", "road_2_10_3", "road_2_9_3", "road_2_8_3", "road_2_7_0", "road_3_7_0"], "interval": 1.0, "startTime": 757, "endTime": 757},
{"vehicle": {"length": 5.0, "width": 2.0, "maxPosAcc": 2.0, "maxNegAcc": 4.5, "usualPosAcc": 2.0, "usualNegAcc": 4.5, "minGap": 2.5, "maxSpeed": 11.111, "headwayTime": 2}, "route": ["road_3_17_3", "road_3_16_2", "road_2_16_3", "road_2_15_3", "road_2_14_3", "road_2_13_3", "road_2_12_3", "road_2_11_3", "road_2_10_3", "road_2_9_3", "road_2_8_3", "road_2_7_3", "road_2_6_3", "road_2_5_3", "road_2_4_3", "road_2_3_0", "road_3_3_1", "road_3_4_0"], "interval": 1.0, "startTime": 759, "endTime": 759},
{"vehicle": {"length": 5.0, "width": 2.0, "maxPosAcc": 2.0, "maxNegAcc": 4.5, "usualPosAcc": 2.0, "usualNegAcc": 4.5, "minGap": 2.5, "maxSpeed": 11.111, "headwayTime": 2}, "route": ["road_0_14_0", "road_1_14_1", "road_1_15_0", "road_2_15_3", "road_2_14_3", "road_2_13_3", "road_2_12_3", "road_2_11_3", "road_2_10_3", "road_2_9_3", "road_2_8_3", "road_2_7_3", "road_2_6_3", "road_2_5_0", "road_3_5_0"], "interval": 1.0, "startTime": 760, "endTime": 760},
{"vehicle": {"length": 5.0, "width": 2.0, "maxPosAcc": 2.0, "maxNegAcc": 4.5, "usualPosAcc": 2.0, "usualNegAcc": 4.5, "minGap": 2.5, "maxSpeed": 11.111, "headwayTime": 2}, "route": ["road_0_2_0", "road_1_2_1", "road_1_3_0", "road_2_3_0", "road_3_3_1", "road_3_4_1", "road_3_5_1", "road_3_6_1", "road_3_7_1", "road_3_8_1", "road_3_9_1", "road_3_10_1", "road_3_11_0"], "interval": 1.0, "startTime": 761, "endTime": 761},
{"vehicle": {"length": 5.0, "width": 2.0, "maxPosAcc": 2.0, "maxNegAcc": 4.5, "usualPosAcc": 2.0, "usualNegAcc": 4.5, "minGap": 2.5, "maxSpeed": 11.111, "headwayTime": 2}, "route": ["road_4_15_2", "road_3_15_1", "road_3_16_2", "road_2_16_3", "road_2_15_3", "road_2_14_3", "road_2_13_3", "road_2_12_3", "road_2_11_3", "road_2_10_3", "road_2_9_3", "road_2_8_3", "road_2_7_3", "road_2_6_3", "road_2_5_0", "road_3_5_1", "road_3_6_0"], "interval": 1.0, "startTime": 763, "endTime": 763},
{"vehicle": {"length": 5.0, "width": 2.0, "maxPosAcc": 2.0, "maxNegAcc": 4.5, "usualPosAcc": 2.0, "usualNegAcc": 4.5, "minGap": 2.5, "maxSpeed": 11.111, "headwayTime": 2}, "route": ["road_0_6_0", "road_1_6_1", "road_1_7_1", "road_1_8_1", "road_1_9_2"], "interval": 1.0, "startTime": 767, "endTime": 767},
{"vehicle": {"length": 5.0, "width": 2.0, "maxPosAcc": 2.0, "maxNegAcc": 4.5, "usualPosAcc": 2.0, "usualNegAcc": 4.5, "minGap": 2.5, "maxSpeed": 11.111, "headwayTime": 2}, "route": ["road_4_8_2", "road_3_8_1", "road_3_9_0"], "interval": 1.0, "startTime": 768, "endTime": 768},
{"vehicle": {"length": 5.0, "width": 2.0, "maxPosAcc": 2.0, "maxNegAcc": 4.5, "usualPosAcc": 2.0, "usualNegAcc": 4.5, "minGap": 2.5, "maxSpeed": 11.111, "headwayTime": 2}, "route": ["road_4_3_2", "road_3_3_1", "road_3_4_1", "road_3_5_0"], "interval": 1.0, "startTime": 770, "endTime": 770},
{"vehicle": {"length": 5.0, "width": 2.0, "maxPosAcc": 2.0, "maxNegAcc": 4.5, "usualPosAcc": 2.0, "usualNegAcc": 4.5, "minGap": 2.5, "maxSpeed": 11.111, "headwayTime": 2}, "route": ["road_4_6_2", "road_3_6_1", "road_3_7_1", "road_3_8_1", "road_3_9_1", "road_3_10_1", "road_3_11_1", "road_3_12_0"], "interval": 1.0, "startTime": 770, "endTime": 770},
{"vehicle": {"length": 5.0, "width": 2.0, "maxPosAcc": 2.0, "maxNegAcc": 4.5, "usualPosAcc": 2.0, "usualNegAcc": 4.5, "minGap": 2.5, "maxSpeed": 11.111, "headwayTime": 2}, "route": ["road_4_13_2", "road_3_13_1", "road_3_14_2", "road_2_14_3", "road_2_13_3", "road_2_12_3", "road_2_11_3", "road_2_10_3", "road_2_9_3", "road_2_8_3", "road_2_7_0", "road_3_7_0"], "interval": 1.0, "startTime": 772, "endTime": 772},
{"vehicle": {"length": 5.0, "width": 2.0, "maxPosAcc": 2.0, "maxNegAcc": 4.5, "usualPosAcc": 2.0, "usualNegAcc": 4.5, "minGap": 2.5, "maxSpeed": 11.111, "headwayTime": 2}, "route": ["road_4_15_2", "road_3_15_1", "road_3_16_2", "road_2_16_3", "road_2_15_3", "road_2_14_3", "road_2_13_3", "road_2_12_3", "road_2_11_0", "road_3_11_0"], "interval": 1.0, "startTime": 773, "endTime": 773},
{"vehicle": {"length": 5.0, "width": 2.0, "maxPosAcc": 2.0, "maxNegAcc": 4.5, "usualPosAcc": 2.0, "usualNegAcc": 4.5, "minGap": 2.5, "maxSpeed": 11.111, "headwayTime": 2}, "route": ["road_2_17_3", "road_2_16_3", "road_2_15_3", "road_2_14_3", "road_2_13_3", "road_2_12_3", "road_2_11_3", "road_2_10_3", "road_2_9_3", "road_2_8_3", "road_2_7_0", "road_3_7_0"], "interval": 1.0, "startTime": 779, "endTime": 779},
{"vehicle": {"length": 5.0, "width": 2.0, "maxPosAcc": 2.0, "maxNegAcc": 4.5, "usualPosAcc": 2.0, "usualNegAcc": 4.5, "minGap": 2.5, "maxSpeed": 11.111, "headwayTime": 2}, "route": ["road_4_2_2", "road_3_2_1", "road_3_3_1", "road_3_4_1", "road_3_5_1", "road_3_6_1", "road_3_7_1", "road_3_8_1", "road_3_9_0"], "interval": 1.0, "startTime": 779, "endTime": 779},
{"vehicle": {"length": 5.0, "width": 2.0, "maxPosAcc": 2.0, "maxNegAcc": 4.5, "usualPosAcc": 2.0, "usualNegAcc": 4.5, "minGap": 2.5, "maxSpeed": 11.111, "headwayTime": 2}, "route": ["road_4_15_2", "road_3_15_1", "road_3_16_2", "road_2_16_3", "road_2_15_3", "road_2_14_3", "road_2_13_3", "road_2_12_3", "road_2_11_3", "road_2_10_3", "road_2_9_3", "road_2_8_2", "road_1_8_1", "road_1_9_2"], "interval": 1.0, "startTime": 780, "endTime": 780},
{"vehicle": {"length": 5.0, "width": 2.0, "maxPosAcc": 2.0, "maxNegAcc": 4.5, "usualPosAcc": 2.0, "usualNegAcc": 4.5, "minGap": 2.5, "maxSpeed": 11.111, "headwayTime": 2}, "route": ["road_0_15_0", "road_1_15_0", "road_2_15_3", "road_2_14_3", "road_2_13_3", "road_2_12_3", "road_2_11_3", "road_2_10_3", "road_2_9_3", "road_2_8_3", "road_2_7_3", "road_2_6_3", "road_2_5_3", "road_2_4_2", "road_1_4_2"], "interval": 1.0, "startTime": 780, "endTime": 780},
{"vehicle": {"length": 5.0, "width": 2.0, "maxPosAcc": 2.0, "maxNegAcc": 4.5, "usualPosAcc": 2.0, "usualNegAcc": 4.5, "minGap": 2.5, "maxSpeed": 11.111, "headwayTime": 2}, "route": ["road_0_8_0", "road_1_8_1", "road_1_9_0", "road_2_9_3", "road_2_8_3", "road_2_7_3", "road_2_6_2", "road_1_6_1", "road_1_7_2"], "interval": 1.0, "startTime": 780, "endTime": 780},
{"vehicle": {"length": 5.0, "width": 2.0, "maxPosAcc": 2.0, "maxNegAcc": 4.5, "usualPosAcc": 2.0, "usualNegAcc": 4.5, "minGap": 2.5, "maxSpeed": 11.111, "headwayTime": 2}, "route": ["road_4_4_2", "road_3_4_1", "road_3_5_1", "road_3_6_1", "road_3_7_1", "road_3_8_1", "road_3_9_1", "road_3_10_1", "road_3_11_1", "road_3_12_1", "road_3_13_1", "road_3_14_1", "road_3_15_1", "road_3_16_1"], "interval": 1.0, "startTime": 780, "endTime": 780},
{"vehicle": {"length": 5.0, "width": 2.0, "maxPosAcc": 2.0, "maxNegAcc": 4.5, "usualPosAcc": 2.0, "usualNegAcc": 4.5, "minGap": 2.5, "maxSpeed": 11.111, "headwayTime": 2}, "route": ["road_3_0_1", "road_3_1_1", "road_3_2_1", "road_3_3_1", "road_3_4_1", "road_3_5_1", "road_3_6_1", "road_3_7_1", "road_3_8_1", "road_3_9_1", "road_3_10_1", "road_3_11_1", "road_3_12_1", "road_3_13_1", "road_3_14_1", "road_3_15_1", "road_3_16_1"], "interval": 1.0, "startTime": 780, "endTime": 780},
{"vehicle": {"length": 5.0, "width": 2.0, "maxPosAcc": 2.0, "maxNegAcc": 4.5, "usualPosAcc": 2.0, "usualNegAcc": 4.5, "minGap": 2.5, "maxSpeed": 11.111, "headwayTime": 2}, "route": ["road_4_3_2", "road_3_3_1", "road_3_4_2", "road_2_4_3", "road_2_3_3", "road_2_2_3", "road_2_1_3"], "interval": 1.0, "startTime": 780, "endTime": 780},
{"vehicle": {"length": 5.0, "width": 2.0, "maxPosAcc": 2.0, "maxNegAcc": 4.5, "usualPosAcc": 2.0, "usualNegAcc": 4.5, "minGap": 2.5, "maxSpeed": 11.111, "headwayTime": 2}, "route": ["road_4_5_2", "road_3_5_1", "road_3_6_2", "road_2_6_3", "road_2_5_3", "road_2_4_2", "road_1_4_1", "road_1_5_2"], "interval": 1.0, "startTime": 780, "endTime": 780},
{"vehicle": {"length": 5.0, "width": 2.0, "maxPosAcc": 2.0, "maxNegAcc": 4.5, "usualPosAcc": 2.0, "usualNegAcc": 4.5, "minGap": 2.5, "maxSpeed": 11.111, "headwayTime": 2}, "route": ["road_4_6_2", "road_3_6_2", "road_2_6_3", "road_2_5_3", "road_2_4_3", "road_2_3_0", "road_3_3_1", "road_3_4_0"], "interval": 1.0, "startTime": 780, "endTime": 780},
{"vehicle": {"length": 5.0, "width": 2.0, "maxPosAcc": 2.0, "maxNegAcc": 4.5, "usualPosAcc": 2.0, "usualNegAcc": 4.5, "minGap": 2.5, "maxSpeed": 11.111, "headwayTime": 2}, "route": ["road_4_7_2", "road_3_7_1", "road_3_8_2", "road_2_8_3", "road_2_7_3", "road_2_6_3", "road_2_5_0", "road_3_5_1", "road_3_6_0"], "interval": 1.0, "startTime": 780, "endTime": 780},
{"vehicle": {"length": 5.0, "width": 2.0, "maxPosAcc": 2.0, "maxNegAcc": 4.5, "usualPosAcc": 2.0, "usualNegAcc": 4.5, "minGap": 2.5, "maxSpeed": 11.111, "headwayTime": 2}, "route": ["road_4_9_2", "road_3_9_1", "road_3_10_1", "road_3_11_1", "road_3_12_1", "road_3_13_1", "road_3_14_2", "road_2_14_2", "road_1_14_2"], "interval": 1.0, "startTime": 780, "endTime": 780},
{"vehicle": {"length": 5.0, "width": 2.0, "maxPosAcc": 2.0, "maxNegAcc": 4.5, "usualPosAcc": 2.0, "usualNegAcc": 4.5, "minGap": 2.5, "maxSpeed": 11.111, "headwayTime": 2}, "route": ["road_4_10_2", "road_3_10_2", "road_2_10_3", "road_2_9_3", "road_2_8_3", "road_2_7_3", "road_2_6_3", "road_2_5_3", "road_2_4_3", "road_2_3_3", "road_2_2_3", "road_2_1_0", "road_3_1_3"], "interval": 1.0, "startTime": 780, "endTime": 780},
{"vehicle": {"length": 5.0, "width": 2.0, "maxPosAcc": 2.0, "maxNegAcc": 4.5, "usualPosAcc": 2.0, "usualNegAcc": 4.5, "minGap": 2.5, "maxSpeed": 11.111, "headwayTime": 2}, "route": ["road_4_12_2", "road_3_12_2", "road_2_12_3", "road_2_11_3", "road_2_10_3", "road_2_9_3", "road_2_8_3", "road_2_7_3", "road_2_6_3", "road_2_5_0", "road_3_5_1", "road_3_6_0"], "interval": 1.0, "startTime": 780, "endTime": 780},
{"vehicle": {"length": 5.0, "width": 2.0, "maxPosAcc": 2.0, "maxNegAcc": 4.5, "usualPosAcc": 2.0, "usualNegAcc": 4.5, "minGap": 2.5, "maxSpeed": 11.111, "headwayTime": 2}, "route": ["road_4_13_2", "road_3_13_1", "road_3_14_0"], "interval": 1.0, "startTime": 780, "endTime": 780},
{"vehicle": {"length": 5.0, "width": 2.0, "maxPosAcc": 2.0, "maxNegAcc": 4.5, "usualPosAcc": 2.0, "usualNegAcc": 4.5, "minGap": 2.5, "maxSpeed": 11.111, "headwayTime": 2}, "route": ["road_4_14_2", "road_3_14_2", "road_2_14_3", "road_2_13_3", "road_2_12_3", "road_2_11_3", "road_2_10_3", "road_2_9_3", "road_2_8_3", "road_2_7_3", "road_2_6_3", "road_2_5_3", "road_2_4_3", "road_2_3_3", "road_2_2_3", "road_2_1_0", "road_3_1_3"], "interval": 1.0, "startTime": 780, "endTime": 780},
{"vehicle": {"length": 5.0, "width": 2.0, "maxPosAcc": 2.0, "maxNegAcc": 4.5, "usualPosAcc": 2.0, "usualNegAcc": 4.5, "minGap": 2.5, "maxSpeed": 11.111, "headwayTime": 2}, "route": ["road_3_17_3", "road_3_16_2", "road_2_16_3", "road_2_15_3", "road_2_14_3", "road_2_13_0", "road_3_13_0"], "interval": 1.0, "startTime": 780, "endTime": 780},
{"vehicle": {"length": 5.0, "width": 2.0, "maxPosAcc": 2.0, "maxNegAcc": 4.5, "usualPosAcc": 2.0, "usualNegAcc": 4.5, "minGap": 2.5, "maxSpeed": 11.111, "headwayTime": 2}, "route": ["road_0_9_0", "road_1_9_1", "road_1_10_1", "road_1_11_1", "road_1_12_1", "road_1_13_1", "road_1_14_2"], "interval": 1.0, "startTime": 780, "endTime": 780},
{"vehicle": {"length": 5.0, "width": 2.0, "maxPosAcc": 2.0, "maxNegAcc": 4.5, "usualPosAcc": 2.0, "usualNegAcc": 4.5, "minGap": 2.5, "maxSpeed": 11.111, "headwayTime": 2}, "route": ["road_0_14_0", "road_1_14_1", "road_1_15_0", "road_2_15_3", "road_2_14_3", "road_2_13_0", "road_3_13_1", "road_3_14_0"], "interval": 1.0, "startTime": 780, "endTime": 780},
{"vehicle": {"length": 5.0, "width": 2.0, "maxPosAcc": 2.0, "maxNegAcc": 4.5, "usualPosAcc": 2.0, "usualNegAcc": 4.5, "minGap": 2.5, "maxSpeed": 11.111, "headwayTime": 2}, "route": ["road_0_13_0", "road_1_13_1", "road_1_14_1", "road_1_15_1", "road_1_16_0", "road_2_16_0", "road_3_16_1"], "interval": 1.0, "startTime": 780, "endTime": 780},
{"vehicle": {"length": 5.0, "width": 2.0, "maxPosAcc": 2.0, "maxNegAcc": 4.5, "usualPosAcc": 2.0, "usualNegAcc": 4.5, "minGap": 2.5, "maxSpeed": 11.111, "headwayTime": 2}, "route": ["road_0_6_0", "road_1_6_1", "road_1_7_1", "road_1_8_1", "road_1_9_1", "road_1_10_2"], "interval": 1.0, "startTime": 780, "endTime": 780},
{"vehicle": {"length": 5.0, "width": 2.0, "maxPosAcc": 2.0, "maxNegAcc": 4.5, "usualPosAcc": 2.0, "usualNegAcc": 4.5, "minGap": 2.5, "maxSpeed": 11.111, "headwayTime": 2}, "route": ["road_0_10_0", "road_1_10_1", "road_1_11_0", "road_2_11_3", "road_2_10_3", "road_2_9_3", "road_2_8_3", "road_2_7_3", "road_2_6_3", "road_2_5_3", "road_2_4_2", "road_1_4_1", "road_1_5_2"], "interval": 1.0, "startTime": 780, "endTime": 780},
{"vehicle": {"length": 5.0, "width": 2.0, "maxPosAcc": 2.0, "maxNegAcc": 4.5, "usualPosAcc": 2.0, "usualNegAcc": 4.5, "minGap": 2.5, "maxSpeed": 11.111, "headwayTime": 2}, "route": ["road_0_2_0", "road_1_2_1", "road_1_3_0", "road_2_3_0", "road_3_3_1", "road_3_4_1", "road_3_5_1", "road_3_6_1", "road_3_7_1", "road_3_8_0"], "interval": 1.0, "startTime": 780, "endTime": 780},
{"vehicle": {"length": 5.0, "width": 2.0, "maxPosAcc": 2.0, "maxNegAcc": 4.5, "usualPosAcc": 2.0, "usualNegAcc": 4.5, "minGap": 2.5, "maxSpeed": 11.111, "headwayTime": 2}, "route": ["road_1_17_3", "road_1_16_0", "road_2_16_3", "road_2_15_3", "road_2_14_3", "road_2_13_3", "road_2_12_3", "road_2_11_3", "road_2_10_3", "road_2_9_3", "road_2_8_3", "road_2_7_3", "road_2_6_3", "road_2_5_3", "road_2_4_3", "road_2_3_0", "road_3_3_0"], "interval": 1.0, "startTime": 780, "endTime": 780},
{"vehicle": {"length": 5.0, "width": 2.0, "maxPosAcc": 2.0, "maxNegAcc": 4.5, "usualPosAcc": 2.0, "usualNegAcc": 4.5, "minGap": 2.5, "maxSpeed": 11.111, "headwayTime": 2}, "route": ["road_4_4_2", "road_3_4_1", "road_3_5_1", "road_3_6_1", "road_3_7_1", "road_3_8_2", "road_2_8_2", "road_1_8_1", "road_1_9_1", "road_1_10_1", "road_1_11_1", "road_1_12_1", "road_1_13_2"], "interval": 1.0, "startTime": 781, "endTime": 781},
{"vehicle": {"length": 5.0, "width": 2.0, "maxPosAcc": 2.0, "maxNegAcc": 4.5, "usualPosAcc": 2.0, "usualNegAcc": 4.5, "minGap": 2.5, "maxSpeed": 11.111, "headwayTime": 2}, "route": ["road_1_0_1", "road_1_1_0", "road_2_1_3"], "interval": 1.0, "startTime": 781, "endTime": 781},
{"vehicle": {"length": 5.0, "width": 2.0, "maxPosAcc": 2.0, "maxNegAcc": 4.5, "usualPosAcc": 2.0, "usualNegAcc": 4.5, "minGap": 2.5, "maxSpeed": 11.111, "headwayTime": 2}, "route": ["road_4_4_2", "road_3_4_2", "road_2_4_3", "road_2_3_3", "road_2_2_3", "road_2_1_0", "road_3_1_1", "road_3_2_0"], "interval": 1.0, "startTime": 786, "endTime": 786},
{"vehicle": {"length": 5.0, "width": 2.0, "maxPosAcc": 2.0, "maxNegAcc": 4.5, "usualPosAcc": 2.0, "usualNegAcc": 4.5, "minGap": 2.5, "maxSpeed": 11.111, "headwayTime": 2}, "route": ["road_4_9_2", "road_3_9_1", "road_3_10_2", "road_2_10_2", "road_1_10_1", "road_1_11_1", "road_1_12_2"], "interval": 1.0, "startTime": 790, "endTime": 790},
{"vehicle": {"length": 5.0, "width": 2.0, "maxPosAcc": 2.0, "maxNegAcc": 4.5, "usualPosAcc": 2.0, "usualNegAcc": 4.5, "minGap": 2.5, "maxSpeed": 11.111, "headwayTime": 2}, "route": ["road_4_8_2", "road_3_8_2", "road_2_8_2", "road_1_8_2"], "interval": 1.0, "startTime": 792, "endTime": 792},
{"vehicle": {"length": 5.0, "width": 2.0, "maxPosAcc": 2.0, "maxNegAcc": 4.5, "usualPosAcc": 2.0, "usualNegAcc": 4.5, "minGap": 2.5, "maxSpeed": 11.111, "headwayTime": 2}, "route": ["road_0_15_0", "road_1_15_0", "road_2_15_3", "road_2_14_2", "road_1_14_2"], "interval": 1.0, "startTime": 795, "endTime": 795},
{"vehicle": {"length": 5.0, "width": 2.0, "maxPosAcc": 2.0, "maxNegAcc": 4.5, "usualPosAcc": 2.0, "usualNegAcc": 4.5, "minGap": 2.5, "maxSpeed": 11.111, "headwayTime": 2}, "route": ["road_4_13_2", "road_3_13_1", "road_3_14_2", "road_2_14_3", "road_2_13_3", "road_2_12_3", "road_2_11_3", "road_2_10_3", "road_2_9_3", "road_2_8_3", "road_2_7_3", "road_2_6_3", "road_2_5_3", "road_2_4_3", "road_2_3_3", "road_2_2_3", "road_2_1_0", "road_3_1_3"], "interval": 1.0, "startTime": 797, "endTime": 797},
{"vehicle": {"length": 5.0, "width": 2.0, "maxPosAcc": 2.0, "maxNegAcc": 4.5, "usualPosAcc": 2.0, "usualNegAcc": 4.5, "minGap": 2.5, "maxSpeed": 11.111, "headwayTime": 2}, "route": ["road_4_12_2", "road_3_12_2", "road_2_12_3", "road_2_11_3", "road_2_10_3", "road_2_9_0", "road_3_9_1", "road_3_10_0"], "interval": 1.0, "startTime": 798, "endTime": 798},
{"vehicle": {"length": 5.0, "width": 2.0, "maxPosAcc": 2.0, "maxNegAcc": 4.5, "usualPosAcc": 2.0, "usualNegAcc": 4.5, "minGap": 2.5, "maxSpeed": 11.111, "headwayTime": 2}, "route": ["road_3_0_1", "road_3_1_1", "road_3_2_1", "road_3_3_1", "road_3_4_1", "road_3_5_1", "road_3_6_1", "road_3_7_0"], "interval": 1.0, "startTime": 802, "endTime": 802},
{"vehicle": {"length": 5.0, "width": 2.0, "maxPosAcc": 2.0, "maxNegAcc": 4.5, "usualPosAcc": 2.0, "usualNegAcc": 4.5, "minGap": 2.5, "maxSpeed": 11.111, "headwayTime": 2}, "route": ["road_4_13_2", "road_3_13_1", "road_3_14_2", "road_2_14_3", "road_2_13_3", "road_2_12_3", "road_2_11_3", "road_2_10_3", "road_2_9_0", "road_3_9_0"], "interval": 1.0, "startTime": 802, "endTime": 802},
{"vehicle": {"length": 5.0, "width": 2.0, "maxPosAcc": 2.0, "maxNegAcc": 4.5, "usualPosAcc": 2.0, "usualNegAcc": 4.5, "minGap": 2.5, "maxSpeed": 11.111, "headwayTime": 2}, "route": ["road_4_9_2", "road_3_9_1", "road_3_10_2", "road_2_10_3", "road_2_9_3", "road_2_8_3", "road_2_7_3", "road_2_6_3", "road_2_5_3", "road_2_4_3", "road_2_3_0", "road_3_3_0"], "interval": 1.0, "startTime": 809, "endTime": 809},
{"vehicle": {"length": 5.0, "width": 2.0, "maxPosAcc": 2.0, "maxNegAcc": 4.5, "usualPosAcc": 2.0, "usualNegAcc": 4.5, "minGap": 2.5, "maxSpeed": 11.111, "headwayTime": 2}, "route": ["road_4_7_2", "road_3_7_1", "road_3_8_2", "road_2_8_3", "road_2_7_3", "road_2_6_3", "road_2_5_3", "road_2_4_3", "road_2_3_3", "road_2_2_3", "road_2_1_0", "road_3_1_3"], "interval": 1.0, "startTime": 812, "endTime": 812},
{"vehicle": {"length": 5.0, "width": 2.0, "maxPosAcc": 2.0, "maxNegAcc": 4.5, "usualPosAcc": 2.0, "usualNegAcc": 4.5, "minGap": 2.5, "maxSpeed": 11.111, "headwayTime": 2}, "route": ["road_4_5_2", "road_3_5_1", "road_3_6_1", "road_3_7_1", "road_3_8_1", "road_3_9_1", "road_3_10_1", "road_3_11_1", "road_3_12_1", "road_3_13_1", "road_3_14_1", "road_3_15_1", "road_3_16_2", "road_2_16_1"], "interval": 1.0, "startTime": 813, "endTime": 813},
{"vehicle": {"length": 5.0, "width": 2.0, "maxPosAcc": 2.0, "maxNegAcc": 4.5, "usualPosAcc": 2.0, "usualNegAcc": 4.5, "minGap": 2.5, "maxSpeed": 11.111, "headwayTime": 2}, "route": ["road_4_7_2", "road_3_7_1", "road_3_8_1", "road_3_9_0"], "interval": 1.0, "startTime": 814, "endTime": 814},
{"vehicle": {"length": 5.0, "width": 2.0, "maxPosAcc": 2.0, "maxNegAcc": 4.5, "usualPosAcc": 2.0, "usualNegAcc": 4.5, "minGap": 2.5, "maxSpeed": 11.111, "headwayTime": 2}, "route": ["road_0_8_0", "road_1_8_1", "road_1_9_0", "road_2_9_3", "road_2_8_3", "road_2_7_0", "road_3_7_1", "road_3_8_0"], "interval": 1.0, "startTime": 816, "endTime": 816},
{"vehicle": {"length": 5.0, "width": 2.0, "maxPosAcc": 2.0, "maxNegAcc": 4.5, "usualPosAcc": 2.0, "usualNegAcc": 4.5, "minGap": 2.5, "maxSpeed": 11.111, "headwayTime": 2}, "route": ["road_4_15_2", "road_3_15_1", "road_3_16_2", "road_2_16_1"], "interval": 1.0, "startTime": 820, "endTime": 820},
{"vehicle": {"length": 5.0, "width": 2.0, "maxPosAcc": 2.0, "maxNegAcc": 4.5, "usualPosAcc": 2.0, "usualNegAcc": 4.5, "minGap": 2.5, "maxSpeed": 11.111, "headwayTime": 2}, "route": ["road_0_7_0", "road_1_7_0", "road_2_7_0", "road_3_7_1", "road_3_8_1", "road_3_9_1", "road_3_10_0"], "interval": 1.0, "startTime": 821, "endTime": 821},
{"vehicle": {"length": 5.0, "width": 2.0, "maxPosAcc": 2.0, "maxNegAcc": 4.5, "usualPosAcc": 2.0, "usualNegAcc": 4.5, "minGap": 2.5, "maxSpeed": 11.111, "headwayTime": 2}, "route": ["road_3_0_1", "road_3_1_1", "road_3_2_1", "road_3_3_1", "road_3_4_2", "road_2_4_2", "road_1_4_1", "road_1_5_1", "road_1_6_1", "road_1_7_1", "road_1_8_1", "road_1_9_1", "road_1_10_1", "road_1_11_1", "road_1_12_1", "road_1_13_1", "road_1_14_1", "road_1_15_1", "road_1_16_1"], "interval": 1.0, "startTime": 822, "endTime": 822},
{"vehicle": {"length": 5.0, "width": 2.0, "maxPosAcc": 2.0, "maxNegAcc": 4.5, "usualPosAcc": 2.0, "usualNegAcc": 4.5, "minGap": 2.5, "maxSpeed": 11.111, "headwayTime": 2}, "route": ["road_4_9_2", "road_3_9_1", "road_3_10_2", "road_2_10_3", "road_2_9_3", "road_2_8_3", "road_2_7_3", "road_2_6_3", "road_2_5_3", "road_2_4_3", "road_2_3_3", "road_2_2_3", "road_2_1_0", "road_3_1_1", "road_3_2_0"], "interval": 1.0, "startTime": 824, "endTime": 824},
{"vehicle": {"length": 5.0, "width": 2.0, "maxPosAcc": 2.0, "maxNegAcc": 4.5, "usualPosAcc": 2.0, "usualNegAcc": 4.5, "minGap": 2.5, "maxSpeed": 11.111, "headwayTime": 2}, "route": ["road_4_8_2", "road_3_8_1", "road_3_9_1", "road_3_10_1", "road_3_11_1", "road_3_12_1", "road_3_13_1", "road_3_14_1", "road_3_15_1", "road_3_16_1"], "interval": 1.0, "startTime": 827, "endTime": 827},
{"vehicle": {"length": 5.0, "width": 2.0, "maxPosAcc": 2.0, "maxNegAcc": 4.5, "usualPosAcc": 2.0, "usualNegAcc": 4.5, "minGap": 2.5, "maxSpeed": 11.111, "headwayTime": 2}, "route": ["road_3_0_1", "road_3_1_1", "road_3_2_1", "road_3_3_1", "road_3_4_1", "road_3_5_1", "road_3_6_1", "road_3_7_1", "road_3_8_1", "road_3_9_1", "road_3_10_1", "road_3_11_1", "road_3_12_1", "road_3_13_1", "road_3_14_1", "road_3_15_1", "road_3_16_1"], "interval": 1.0, "startTime": 832, "endTime": 832},
{"vehicle": {"length": 5.0, "width": 2.0, "maxPosAcc": 2.0, "maxNegAcc": 4.5, "usualPosAcc": 2.0, "usualNegAcc": 4.5, "minGap": 2.5, "maxSpeed": 11.111, "headwayTime": 2}, "route": ["road_4_2_2", "road_3_2_2", "road_2_2_3", "road_2_1_2", "road_1_1_3"], "interval": 1.0, "startTime": 832, "endTime": 832},
{"vehicle": {"length": 5.0, "width": 2.0, "maxPosAcc": 2.0, "maxNegAcc": 4.5, "usualPosAcc": 2.0, "usualNegAcc": 4.5, "minGap": 2.5, "maxSpeed": 11.111, "headwayTime": 2}, "route": ["road_3_0_1", "road_3_1_1", "road_3_2_1", "road_3_3_1", "road_3_4_2", "road_2_4_2", "road_1_4_1", "road_1_5_1", "road_1_6_1", "road_1_7_1", "road_1_8_2"], "interval": 1.0, "startTime": 837, "endTime": 837},
{"vehicle": {"length": 5.0, "width": 2.0, "maxPosAcc": 2.0, "maxNegAcc": 4.5, "usualPosAcc": 2.0, "usualNegAcc": 4.5, "minGap": 2.5, "maxSpeed": 11.111, "headwayTime": 2}, "route": ["road_0_15_0", "road_1_15_0", "road_2_15_3", "road_2_14_3", "road_2_13_3", "road_2_12_3", "road_2_11_3", "road_2_10_3", "road_2_9_3", "road_2_8_3", "road_2_7_3", "road_2_6_3", "road_2_5_3", "road_2_4_3", "road_2_3_3", "road_2_2_3", "road_2_1_2", "road_1_1_3"], "interval": 1.0, "startTime": 840, "endTime": 840},
{"vehicle": {"length": 5.0, "width": 2.0, "maxPosAcc": 2.0, "maxNegAcc": 4.5, "usualPosAcc": 2.0, "usualNegAcc": 4.5, "minGap": 2.5, "maxSpeed": 11.111, "headwayTime": 2}, "route": ["road_3_0_1", "road_3_1_1", "road_3_2_1", "road_3_3_1", "road_3_4_1", "road_3_5_1", "road_3_6_1", "road_3_7_1", "road_3_8_1", "road_3_9_1", "road_3_10_1", "road_3_11_1", "road_3_12_0"], "interval": 1.0, "startTime": 840, "endTime": 840},
{"vehicle": {"length": 5.0, "width": 2.0, "maxPosAcc": 2.0, "maxNegAcc": 4.5, "usualPosAcc": 2.0, "usualNegAcc": 4.5, "minGap": 2.5, "maxSpeed": 11.111, "headwayTime": 2}, "route": ["road_4_3_2", "road_3_3_1", "road_3_4_1", "road_3_5_1", "road_3_6_1", "road_3_7_1", "road_3_8_1", "road_3_9_1", "road_3_10_1", "road_3_11_1", "road_3_12_1", "road_3_13_1", "road_3_14_1", "road_3_15_0"], "interval": 1.0, "startTime": 840, "endTime": 840},
{"vehicle": {"length": 5.0, "width": 2.0, "maxPosAcc": 2.0, "maxNegAcc": 4.5, "usualPosAcc": 2.0, "usualNegAcc": 4.5, "minGap": 2.5, "maxSpeed": 11.111, "headwayTime": 2}, "route": ["road_4_5_2", "road_3_5_1", "road_3_6_2", "road_2_6_2", "road_1_6_2"], "interval": 1.0, "startTime": 840, "endTime": 840},
{"vehicle": {"length": 5.0, "width": 2.0, "maxPosAcc": 2.0, "maxNegAcc": 4.5, "usualPosAcc": 2.0, "usualNegAcc": 4.5, "minGap": 2.5, "maxSpeed": 11.111, "headwayTime": 2}, "route": ["road_4_9_2", "road_3_9_1", "road_3_10_1", "road_3_11_1", "road_3_12_1", "road_3_13_1", "road_3_14_2", "road_2_14_2", "road_1_14_1", "road_1_15_1", "road_1_16_1"], "interval": 1.0, "startTime": 840, "endTime": 840},
{"vehicle": {"length": 5.0, "width": 2.0, "maxPosAcc": 2.0, "maxNegAcc": 4.5, "usualPosAcc": 2.0, "usualNegAcc": 4.5, "minGap": 2.5, "maxSpeed": 11.111, "headwayTime": 2}, "route": ["road_4_10_2", "road_3_10_1", "road_3_11_1", "road_3_12_1", "road_3_13_1", "road_3_14_1", "road_3_15_1", "road_3_16_1"], "interval": 1.0, "startTime": 840, "endTime": 840},
{"vehicle": {"length": 5.0, "width": 2.0, "maxPosAcc": 2.0, "maxNegAcc": 4.5, "usualPosAcc": 2.0, "usualNegAcc": 4.5, "minGap": 2.5, "maxSpeed": 11.111, "headwayTime": 2}, "route": ["road_4_11_2", "road_3_11_1", "road_3_12_1", "road_3_13_1", "road_3_14_0"], "interval": 1.0, "startTime": 840, "endTime": 840},
{"vehicle": {"length": 5.0, "width": 2.0, "maxPosAcc": 2.0, "maxNegAcc": 4.5, "usualPosAcc": 2.0, "usualNegAcc": 4.5, "minGap": 2.5, "maxSpeed": 11.111, "headwayTime": 2}, "route": ["road_4_13_2", "road_3_13_1", "road_3_14_2", "road_2_14_3", "road_2_13_3", "road_2_12_3", "road_2_11_3", "road_2_10_3", "road_2_9_3", "road_2_8_3", "road_2_7_3", "road_2_6_3", "road_2_5_3", "road_2_4_3", "road_2_3_3", "road_2_2_3", "road_2_1_0", "road_3_1_1", "road_3_2_0"], "interval": 1.0, "startTime": 840, "endTime": 840},
{"vehicle": {"length": 5.0, "width": 2.0, "maxPosAcc": 2.0, "maxNegAcc": 4.5, "usualPosAcc": 2.0, "usualNegAcc": 4.5, "minGap": 2.5, "maxSpeed": 11.111, "headwayTime": 2}, "route": ["road_3_17_3", "road_3_16_2", "road_2_16_3", "road_2_15_3", "road_2_14_3", "road_2_13_3", "road_2_12_3", "road_2_11_3", "road_2_10_3", "road_2_9_3", "road_2_8_3", "road_2_7_3", "road_2_6_3", "road_2_5_3", "road_2_4_3", "road_2_3_3", "road_2_2_3", "road_2_1_0", "road_3_1_3"], "interval": 1.0, "startTime": 840, "endTime": 840},
{"vehicle": {"length": 5.0, "width": 2.0, "maxPosAcc": 2.0, "maxNegAcc": 4.5, "usualPosAcc": 2.0, "usualNegAcc": 4.5, "minGap": 2.5, "maxSpeed": 11.111, "headwayTime": 2}, "route": ["road_2_0_1", "road_2_1_0", "road_3_1_3"], "interval": 1.0, "startTime": 840, "endTime": 840},
{"vehicle": {"length": 5.0, "width": 2.0, "maxPosAcc": 2.0, "maxNegAcc": 4.5, "usualPosAcc": 2.0, "usualNegAcc": 4.5, "minGap": 2.5, "maxSpeed": 11.111, "headwayTime": 2}, "route": ["road_1_0_1", "road_1_1_1", "road_1_2_1", "road_1_3_0", "road_2_3_0", "road_3_3_1", "road_3_4_1", "road_3_5_1", "road_3_6_1", "road_3_7_1", "road_3_8_1", "road_3_9_0"], "interval": 1.0, "startTime": 840, "endTime": 840},
{"vehicle": {"length": 5.0, "width": 2.0, "maxPosAcc": 2.0, "maxNegAcc": 4.5, "usualPosAcc": 2.0, "usualNegAcc": 4.5, "minGap": 2.5, "maxSpeed": 11.111, "headwayTime": 2}, "route": ["road_0_9_0", "road_1_9_0", "road_2_9_3", "road_2_8_3", "road_2_7_3", "road_2_6_3", "road_2_5_3", "road_2_4_3", "road_2_3_3", "road_2_2_3", "road_2_1_0", "road_3_1_1", "road_3_2_0"], "interval": 1.0, "startTime": 840, "endTime": 840},
{"vehicle": {"length": 5.0, "width": 2.0, "maxPosAcc": 2.0, "maxNegAcc": 4.5, "usualPosAcc": 2.0, "usualNegAcc": 4.5, "minGap": 2.5, "maxSpeed": 11.111, "headwayTime": 2}, "route": ["road_0_14_0", "road_1_14_1", "road_1_15_0", "road_2_15_3", "road_2_14_3", "road_2_13_3", "road_2_12_3", "road_2_11_3", "road_2_10_3", "road_2_9_3", "road_2_8_3", "road_2_7_3", "road_2_6_3", "road_2_5_3", "road_2_4_3", "road_2_3_3", "road_2_2_3", "road_2_1_0", "road_3_1_1", "road_3_2_0"], "interval": 1.0, "startTime": 840, "endTime": 840},
{"vehicle": {"length": 5.0, "width": 2.0, "maxPosAcc": 2.0, "maxNegAcc": 4.5, "usualPosAcc": 2.0, "usualNegAcc": 4.5, "minGap": 2.5, "maxSpeed": 11.111, "headwayTime": 2}, "route": ["road_0_3_0", "road_1_3_1", "road_1_4_1", "road_1_5_1", "road_1_6_1", "road_1_7_1", "road_1_8_1", "road_1_9_1", "road_1_10_1", "road_1_11_1", "road_1_12_2"], "interval": 1.0, "startTime": 840, "endTime": 840},
{"vehicle": {"length": 5.0, "width": 2.0, "maxPosAcc": 2.0, "maxNegAcc": 4.5, "usualPosAcc": 2.0, "usualNegAcc": 4.5, "minGap": 2.5, "maxSpeed": 11.111, "headwayTime": 2}, "route": ["road_2_17_3", "road_2_16_3", "road_2_15_3", "road_2_14_3", "road_2_13_3", "road_2_12_3", "road_2_11_3", "road_2_10_3", "road_2_9_3", "road_2_8_3", "road_2_7_0", "road_3_7_1", "road_3_8_0"], "interval": 1.0, "startTime": 840, "endTime": 840},
{"vehicle": {"length": 5.0, "width": 2.0, "maxPosAcc": 2.0, "maxNegAcc": 4.5, "usualPosAcc": 2.0, "usualNegAcc": 4.5, "minGap": 2.5, "maxSpeed": 11.111, "headwayTime": 2}, "route": ["road_0_12_0", "road_1_12_1", "road_1_13_0", "road_2_13_3", "road_2_12_3", "road_2_11_3", "road_2_10_3", "road_2_9_3", "road_2_8_3", "road_2_7_3", "road_2_6_3", "road_2_5_3", "road_2_4_3", "road_2_3_0", "road_3_3_1", "road_3_4_0"], "interval": 1.0, "startTime": 840, "endTime": 840},
{"vehicle": {"length": 5.0, "width": 2.0, "maxPosAcc": 2.0, "maxNegAcc": 4.5, "usualPosAcc": 2.0, "usualNegAcc": 4.5, "minGap": 2.5, "maxSpeed": 11.111, "headwayTime": 2}, "route": ["road_1_17_3", "road_1_16_0", "road_2_16_1"], "interval": 1.0, "startTime": 840, "endTime": 840},
{"vehicle": {"length": 5.0, "width": 2.0, "maxPosAcc": 2.0, "maxNegAcc": 4.5, "usualPosAcc": 2.0, "usualNegAcc": 4.5, "minGap": 2.5, "maxSpeed": 11.111, "headwayTime": 2}, "route": ["road_0_5_0", "road_1_5_0", "road_2_5_0", "road_3_5_1", "road_3_6_1", "road_3_7_1", "road_3_8_1", "road_3_9_1", "road_3_10_1", "road_3_11_1", "road_3_12_0"], "interval": 1.0, "startTime": 840, "endTime": 840},
{"vehicle": {"length": 5.0, "width": 2.0, "maxPosAcc": 2.0, "maxNegAcc": 4.5, "usualPosAcc": 2.0, "usualNegAcc": 4.5, "minGap": 2.5, "maxSpeed": 11.111, "headwayTime": 2}, "route": ["road_4_2_2", "road_3_2_1", "road_3_3_1", "road_3_4_1", "road_3_5_1", "road_3_6_1", "road_3_7_1", "road_3_8_1", "road_3_9_1", "road_3_10_0"], "interval": 1.0, "startTime": 840, "endTime": 840},
{"vehicle": {"length": 5.0, "width": 2.0, "maxPosAcc": 2.0, "maxNegAcc": 4.5, "usualPosAcc": 2.0, "usualNegAcc": 4.5, "minGap": 2.5, "maxSpeed": 11.111, "headwayTime": 2}, "route": ["road_0_10_0", "road_1_10_1", "road_1_11_0", "road_2_11_3", "road_2_10_3", "road_2_9_3", "road_2_8_3", "road_2_7_3", "road_2_6_3", "road_2_5_3", "road_2_4_3", "road_2_3_0", "road_3_3_0"], "interval": 1.0, "startTime": 843, "endTime": 843},
{"vehicle": {"length": 5.0, "width": 2.0, "maxPosAcc": 2.0, "maxNegAcc": 4.5, "usualPosAcc": 2.0, "usualNegAcc": 4.5, "minGap": 2.5, "maxSpeed": 11.111, "headwayTime": 2}, "route": ["road_4_5_2", "road_3_5_1", "road_3_6_2", "road_2_6_3", "road_2_5_3", "road_2_4_3", "road_2_3_0", "road_3_3_1", "road_3_4_0"], "interval": 1.0, "startTime": 846, "endTime": 846},
{"vehicle": {"length": 5.0, "width": 2.0, "maxPosAcc": 2.0, "maxNegAcc": 4.5, "usualPosAcc": 2.0, "usualNegAcc": 4.5, "minGap": 2.5, "maxSpeed": 11.111, "headwayTime": 2}, "route": ["road_4_14_2", "road_3_14_2", "road_2_14_3", "road_2_13_3", "road_2_12_2", "road_1_12_2"], "interval": 1.0, "startTime": 847, "endTime": 847},
{"vehicle": {"length": 5.0, "width": 2.0, "maxPosAcc": 2.0, "maxNegAcc": 4.5, "usualPosAcc": 2.0, "usualNegAcc": 4.5, "minGap": 2.5, "maxSpeed": 11.111, "headwayTime": 2}, "route": ["road_4_12_2", "road_3_12_2", "road_2_12_3", "road_2_11_3", "road_2_10_3", "road_2_9_3", "road_2_8_2", "road_1_8_2"], "interval": 1.0, "startTime": 848, "endTime": 848},
{"vehicle": {"length": 5.0, "width": 2.0, "maxPosAcc": 2.0, "maxNegAcc": 4.5, "usualPosAcc": 2.0, "usualNegAcc": 4.5, "minGap": 2.5, "maxSpeed": 11.111, "headwayTime": 2}, "route": ["road_4_5_2", "road_3_5_1", "road_3_6_0"], "interval": 1.0, "startTime": 855, "endTime": 855},
{"vehicle": {"length": 5.0, "width": 2.0, "maxPosAcc": 2.0, "maxNegAcc": 4.5, "usualPosAcc": 2.0, "usualNegAcc": 4.5, "minGap": 2.5, "maxSpeed": 11.111, "headwayTime": 2}, "route": ["road_4_13_2", "road_3_13_1", "road_3_14_2", "road_2_14_3", "road_2_13_3", "road_2_12_3", "road_2_11_3", "road_2_10_3", "road_2_9_3", "road_2_8_3", "road_2_7_3", "road_2_6_3", "road_2_5_3", "road_2_4_3", "road_2_3_0", "road_3_3_0"], "interval": 1.0, "startTime": 857, "endTime": 857},
{"vehicle": {"length": 5.0, "width": 2.0, "maxPosAcc": 2.0, "maxNegAcc": 4.5, "usualPosAcc": 2.0, "usualNegAcc": 4.5, "minGap": 2.5, "maxSpeed": 11.111, "headwayTime": 2}, "route": ["road_4_4_2", "road_3_4_1", "road_3_5_0"], "interval": 1.0, "startTime": 859, "endTime": 859},
{"vehicle": {"length": 5.0, "width": 2.0, "maxPosAcc": 2.0, "maxNegAcc": 4.5, "usualPosAcc": 2.0, "usualNegAcc": 4.5, "minGap": 2.5, "maxSpeed": 11.111, "headwayTime": 2}, "route": ["road_0_14_0", "road_1_14_1", "road_1_15_0", "road_2_15_3", "road_2_14_3", "road_2_13_3", "road_2_12_3", "road_2_11_3", "road_2_10_3", "road_2_9_3", "road_2_8_3", "road_2_7_3", "road_2_6_3", "road_2_5_3", "road_2_4_2", "road_1_4_2"], "interval": 1.0, "startTime": 859, "endTime": 859},
{"vehicle": {"length": 5.0, "width": 2.0, "maxPosAcc": 2.0, "maxNegAcc": 4.5, "usualPosAcc": 2.0, "usualNegAcc": 4.5, "minGap": 2.5, "maxSpeed": 11.111, "headwayTime": 2}, "route": ["road_4_13_2", "road_3_13_1", "road_3_14_1", "road_3_15_1", "road_3_16_1"], "interval": 1.0, "startTime": 860, "endTime": 860},
{"vehicle": {"length": 5.0, "width": 2.0, "maxPosAcc": 2.0, "maxNegAcc": 4.5, "usualPosAcc": 2.0, "usualNegAcc": 4.5, "minGap": 2.5, "maxSpeed": 11.111, "headwayTime": 2}, "route": ["road_4_2_2", "road_3_2_2", "road_2_2_3", "road_2_1_0", "road_3_1_3"], "interval": 1.0, "startTime": 860, "endTime": 860},
{"vehicle": {"length": 5.0, "width": 2.0, "maxPosAcc": 2.0, "maxNegAcc": 4.5, "usualPosAcc": 2.0, "usualNegAcc": 4.5, "minGap": 2.5, "maxSpeed": 11.111, "headwayTime": 2}, "route": ["road_3_0_1", "road_3_1_2", "road_2_1_2", "road_1_1_3"], "interval": 1.0, "startTime": 862, "endTime": 862},
{"vehicle": {"length": 5.0, "width": 2.0, "maxPosAcc": 2.0, "maxNegAcc": 4.5, "usualPosAcc": 2.0, "usualNegAcc": 4.5, "minGap": 2.5, "maxSpeed": 11.111, "headwayTime": 2}, "route": ["road_4_4_2", "road_3_4_1", "road_3_5_1", "road_3_6_1", "road_3_7_1", "road_3_8_2", "road_2_8_2", "road_1_8_2"], "interval": 1.0, "startTime": 864, "endTime": 864},
{"vehicle": {"length": 5.0, "width": 2.0, "maxPosAcc": 2.0, "maxNegAcc": 4.5, "usualPosAcc": 2.0, "usualNegAcc": 4.5, "minGap": 2.5, "maxSpeed": 11.111, "headwayTime": 2}, "route": ["road_3_17_3", "road_3_16_2", "road_2_16_3", "road_2_15_3", "road_2_14_3", "road_2_13_0", "road_3_13_0"], "interval": 1.0, "startTime": 872, "endTime": 872},
{"vehicle": {"length": 5.0, "width": 2.0, "maxPosAcc": 2.0, "maxNegAcc": 4.5, "usualPosAcc": 2.0, "usualNegAcc": 4.5, "minGap": 2.5, "maxSpeed": 11.111, "headwayTime": 2}, "route": ["road_4_2_2", "road_3_2_1", "road_3_3_0"], "interval": 1.0, "startTime": 872, "endTime": 872},
{"vehicle": {"length": 5.0, "width": 2.0, "maxPosAcc": 2.0, "maxNegAcc": 4.5, "usualPosAcc": 2.0, "usualNegAcc": 4.5, "minGap": 2.5, "maxSpeed": 11.111, "headwayTime": 2}, "route": ["road_0_15_0", "road_1_15_0", "road_2_15_3", "road_2_14_3", "road_2_13_3", "road_2_12_2", "road_1_12_2"], "interval": 1.0, "startTime": 874, "endTime": 874},
{"vehicle": {"length": 5.0, "width": 2.0, "maxPosAcc": 2.0, "maxNegAcc": 4.5, "usualPosAcc": 2.0, "usualNegAcc": 4.5, "minGap": 2.5, "maxSpeed": 11.111, "headwayTime": 2}, "route": ["road_0_15_0", "road_1_15_0", "road_2_15_3", "road_2_14_3", "road_2_13_3", "road_2_12_3", "road_2_11_3", "road_2_10_3", "road_2_9_3", "road_2_8_3", "road_2_7_3", "road_2_6_3", "road_2_5_0", "road_3_5_0"], "interval": 1.0, "startTime": 877, "endTime": 877},
{"vehicle": {"length": 5.0, "width": 2.0, "maxPosAcc": 2.0, "maxNegAcc": 4.5, "usualPosAcc": 2.0, "usualNegAcc": 4.5, "minGap": 2.5, "maxSpeed": 11.111, "headwayTime": 2}, "route": ["road_4_8_2", "road_3_8_1", "road_3_9_1", "road_3_10_1", "road_3_11_0"], "interval": 1.0, "startTime": 877, "endTime": 877},
{"vehicle": {"length": 5.0, "width": 2.0, "maxPosAcc": 2.0, "maxNegAcc": 4.5, "usualPosAcc": 2.0, "usualNegAcc": 4.5, "minGap": 2.5, "maxSpeed": 11.111, "headwayTime": 2}, "route": ["road_4_5_2", "road_3_5_1", "road_3_6_1", "road_3_7_1", "road_3_8_1", "road_3_9_0"], "interval": 1.0, "startTime": 877, "endTime": 877},
{"vehicle": {"length": 5.0, "width": 2.0, "maxPosAcc": 2.0, "maxNegAcc": 4.5, "usualPosAcc": 2.0, "usualNegAcc": 4.5, "minGap": 2.5, "maxSpeed": 11.111, "headwayTime": 2}, "route": ["road_4_12_2", "road_3_12_1", "road_3_13_0"], "interval": 1.0, "startTime": 877, "endTime": 877},
{"vehicle": {"length": 5.0, "width": 2.0, "maxPosAcc": 2.0, "maxNegAcc": 4.5, "usualPosAcc": 2.0, "usualNegAcc": 4.5, "minGap": 2.5, "maxSpeed": 11.111, "headwayTime": 2}, "route": ["road_2_17_3", "road_2_16_2", "road_1_16_1"], "interval": 1.0, "startTime": 879, "endTime": 879},
{"vehicle": {"length": 5.0, "width": 2.0, "maxPosAcc": 2.0, "maxNegAcc": 4.5, "usualPosAcc": 2.0, "usualNegAcc": 4.5, "minGap": 2.5, "maxSpeed": 11.111, "headwayTime": 2}, "route": ["road_4_3_2", "road_3_3_1", "road_3_4_2", "road_2_4_3", "road_2_3_3", "road_2_2_3", "road_2_1_3"], "interval": 1.0, "startTime": 880, "endTime": 880},
{"vehicle": {"length": 5.0, "width": 2.0, "maxPosAcc": 2.0, "maxNegAcc": 4.5, "usualPosAcc": 2.0, "usualNegAcc": 4.5, "minGap": 2.5, "maxSpeed": 11.111, "headwayTime": 2}, "route": ["road_4_10_2", "road_3_10_1", "road_3_11_1", "road_3_12_1", "road_3_13_1", "road_3_14_1", "road_3_15_1", "road_3_16_1"], "interval": 1.0, "startTime": 880, "endTime": 880},
{"vehicle": {"length": 5.0, "width": 2.0, "maxPosAcc": 2.0, "maxNegAcc": 4.5, "usualPosAcc": 2.0, "usualNegAcc": 4.5, "minGap": 2.5, "maxSpeed": 11.111, "headwayTime": 2}, "route": ["road_3_0_1", "road_3_1_2", "road_2_1_3"], "interval": 1.0, "startTime": 881, "endTime": 881},
{"vehicle": {"length": 5.0, "width": 2.0, "maxPosAcc": 2.0, "maxNegAcc": 4.5, "usualPosAcc": 2.0, "usualNegAcc": 4.5, "minGap": 2.5, "maxSpeed": 11.111, "headwayTime": 2}, "route": ["road_4_8_2", "road_3_8_1", "road_3_9_1", "road_3_10_1", "road_3_11_1", "road_3_12_0"], "interval": 1.0, "startTime": 887, "endTime": 887},
{"vehicle": {"length": 5.0, "width": 2.0, "maxPosAcc": 2.0, "maxNegAcc": 4.5, "usualPosAcc": 2.0, "usualNegAcc": 4.5, "minGap": 2.5, "maxSpeed": 11.111, "headwayTime": 2}, "route": ["road_4_3_2", "road_3_3_1", "road_3_4_1", "road_3_5_1", "road_3_6_1", "road_3_7_1", "road_3_8_1", "road_3_9_1", "road_3_10_1", "road_3_11_1", "road_3_12_1", "road_3_13_1", "road_3_14_1", "road_3_15_1", "road_3_16_1"], "interval": 1.0, "startTime": 887, "endTime": 887},
{"vehicle": {"length": 5.0, "width": 2.0, "maxPosAcc": 2.0, "maxNegAcc": 4.5, "usualPosAcc": 2.0, "usualNegAcc": 4.5, "minGap": 2.5, "maxSpeed": 11.111, "headwayTime": 2}, "route": ["road_4_7_2", "road_3_7_1", "road_3_8_1", "road_3_9_1", "road_3_10_1", "road_3_11_1", "road_3_12_1", "road_3_13_1", "road_3_14_1", "road_3_15_1", "road_3_16_1"], "interval": 1.0, "startTime": 889, "endTime": 889},
{"vehicle": {"length": 5.0, "width": 2.0, "maxPosAcc": 2.0, "maxNegAcc": 4.5, "usualPosAcc": 2.0, "usualNegAcc": 4.5, "minGap": 2.5, "maxSpeed": 11.111, "headwayTime": 2}, "route": ["road_0_7_0", "road_1_7_1", "road_1_8_1", "road_1_9_1", "road_1_10_1", "road_1_11_1", "road_1_12_1", "road_1_13_2"], "interval": 1.0, "startTime": 889, "endTime": 889},
{"vehicle": {"length": 5.0, "width": 2.0, "maxPosAcc": 2.0, "maxNegAcc": 4.5, "usualPosAcc": 2.0, "usualNegAcc": 4.5, "minGap": 2.5, "maxSpeed": 11.111, "headwayTime": 2}, "route": ["road_0_12_0", "road_1_12_1", "road_1_13_1", "road_1_14_2"], "interval": 1.0, "startTime": 891, "endTime": 891},
{"vehicle": {"length": 5.0, "width": 2.0, "maxPosAcc": 2.0, "maxNegAcc": 4.5, "usualPosAcc": 2.0, "usualNegAcc": 4.5, "minGap": 2.5, "maxSpeed": 11.111, "headwayTime": 2}, "route": ["road_4_5_2", "road_3_5_1", "road_3_6_0"], "interval": 1.0, "startTime": 892, "endTime": 892},
{"vehicle": {"length": 5.0, "width": 2.0, "maxPosAcc": 2.0, "maxNegAcc": 4.5, "usualPosAcc": 2.0, "usualNegAcc": 4.5, "minGap": 2.5, "maxSpeed": 11.111, "headwayTime": 2}, "route": ["road_1_17_3", "road_1_16_0", "road_2_16_3", "road_2_15_3", "road_2_14_3", "road_2_13_3", "road_2_12_3", "road_2_11_0", "road_3_11_0"], "interval": 1.0, "startTime": 892, "endTime": 892},
{"vehicle": {"length": 5.0, "width": 2.0, "maxPosAcc": 2.0, "maxNegAcc": 4.5, "usualPosAcc": 2.0, "usualNegAcc": 4.5, "minGap": 2.5, "maxSpeed": 11.111, "headwayTime": 2}, "route": ["road_3_17_3", "road_3_16_2", "road_2_16_3", "road_2_15_3", "road_2_14_3", "road_2_13_3", "road_2_12_3", "road_2_11_0", "road_3_11_1", "road_3_12_0"], "interval": 1.0, "startTime": 894, "endTime": 894},
{"vehicle": {"length": 5.0, "width": 2.0, "maxPosAcc": 2.0, "maxNegAcc": 4.5, "usualPosAcc": 2.0, "usualNegAcc": 4.5, "minGap": 2.5, "maxSpeed": 11.111, "headwayTime": 2}, "route": ["road_4_13_2", "road_3_13_1", "road_3_14_1", "road_3_15_0"], "interval": 1.0, "startTime": 895, "endTime": 895},
{"vehicle": {"length": 5.0, "width": 2.0, "maxPosAcc": 2.0, "maxNegAcc": 4.5, "usualPosAcc": 2.0, "usualNegAcc": 4.5, "minGap": 2.5, "maxSpeed": 11.111, "headwayTime": 2}, "route": ["road_3_17_3", "road_3_16_2", "road_2_16_3", "road_2_15_3", "road_2_14_3", "road_2_13_3", "road_2_12_3", "road_2_11_3", "road_2_10_3", "road_2_9_3", "road_2_8_3", "road_2_7_3", "road_2_6_3", "road_2_5_3", "road_2_4_3", "road_2_3_3", "road_2_2_3", "road_2_1_0", "road_3_1_3"], "interval": 1.0, "startTime": 895, "endTime": 895},
{"vehicle": {"length": 5.0, "width": 2.0, "maxPosAcc": 2.0, "maxNegAcc": 4.5, "usualPosAcc": 2.0, "usualNegAcc": 4.5, "minGap": 2.5, "maxSpeed": 11.111, "headwayTime": 2}, "route": ["road_4_10_2", "road_3_10_1", "road_3_11_1", "road_3_12_1", "road_3_13_0"], "interval": 1.0, "startTime": 896, "endTime": 896},
{"vehicle": {"length": 5.0, "width": 2.0, "maxPosAcc": 2.0, "maxNegAcc": 4.5, "usualPosAcc": 2.0, "usualNegAcc": 4.5, "minGap": 2.5, "maxSpeed": 11.111, "headwayTime": 2}, "route": ["road_2_17_3", "road_2_16_2", "road_1_16_1"], "interval": 1.0, "startTime": 899, "endTime": 899},
{"vehicle": {"length": 5.0, "width": 2.0, "maxPosAcc": 2.0, "maxNegAcc": 4.5, "usualPosAcc": 2.0, "usualNegAcc": 4.5, "minGap": 2.5, "maxSpeed": 11.111, "headwayTime": 2}, "route": ["road_0_15_0", "road_1_15_0", "road_2_15_3", "road_2_14_3", "road_2_13_3", "road_2_12_3", "road_2_11_3", "road_2_10_3", "road_2_9_3", "road_2_8_3", "road_2_7_3", "road_2_6_3", "road_2_5_3", "road_2_4_2", "road_1_4_2"], "interval": 1.0, "startTime": 900, "endTime": 900},
{"vehicle": {"length": 5.0, "width": 2.0, "maxPosAcc": 2.0, "maxNegAcc": 4.5, "usualPosAcc": 2.0, "usualNegAcc": 4.5, "minGap": 2.5, "maxSpeed": 11.111, "headwayTime": 2}, "route": ["road_0_8_0", "road_1_8_1", "road_1_9_1", "road_1_10_1", "road_1_11_1", "road_1_12_1", "road_1_13_1", "road_1_14_1", "road_1_15_2"], "interval": 1.0, "startTime": 900, "endTime": 900},
{"vehicle": {"length": 5.0, "width": 2.0, "maxPosAcc": 2.0, "maxNegAcc": 4.5, "usualPosAcc": 2.0, "usualNegAcc": 4.5, "minGap": 2.5, "maxSpeed": 11.111, "headwayTime": 2}, "route": ["road_4_4_2", "road_3_4_2", "road_2_4_2", "road_1_4_1", "road_1_5_2"], "interval": 1.0, "startTime": 900, "endTime": 900},
{"vehicle": {"length": 5.0, "width": 2.0, "maxPosAcc": 2.0, "maxNegAcc": 4.5, "usualPosAcc": 2.0, "usualNegAcc": 4.5, "minGap": 2.5, "maxSpeed": 11.111, "headwayTime": 2}, "route": ["road_3_0_1", "road_3_1_1", "road_3_2_1", "road_3_3_1", "road_3_4_1", "road_3_5_1", "road_3_6_1", "road_3_7_0"], "interval": 1.0, "startTime": 900, "endTime": 900},
{"vehicle": {"length": 5.0, "width": 2.0, "maxPosAcc": 2.0, "maxNegAcc": 4.5, "usualPosAcc": 2.0, "usualNegAcc": 4.5, "minGap": 2.5, "maxSpeed": 11.111, "headwayTime": 2}, "route": ["road_4_3_2", "road_3_3_1", "road_3_4_2", "road_2_4_3", "road_2_3_3", "road_2_2_3", "road_2_1_0", "road_3_1_3"], "interval": 1.0, "startTime": 900, "endTime": 900},
{"vehicle": {"length": 5.0, "width": 2.0, "maxPosAcc": 2.0, "maxNegAcc": 4.5, "usualPosAcc": 2.0, "usualNegAcc": 4.5, "minGap": 2.5, "maxSpeed": 11.111, "headwayTime": 2}, "route": ["road_4_5_2", "road_3_5_1", "road_3_6_1", "road_3_7_1", "road_3_8_1", "road_3_9_1", "road_3_10_1", "road_3_11_1", "road_3_12_1", "road_3_13_0"], "interval": 1.0, "startTime": 900, "endTime": 900},
{"vehicle": {"length": 5.0, "width": 2.0, "maxPosAcc": 2.0, "maxNegAcc": 4.5, "usualPosAcc": 2.0, "usualNegAcc": 4.5, "minGap": 2.5, "maxSpeed": 11.111, "headwayTime": 2}, "route": ["road_4_6_2", "road_3_6_1", "road_3_7_1", "road_3_8_1", "road_3_9_1", "road_3_10_1", "road_3_11_1", "road_3_12_1", "road_3_13_1", "road_3_14_0"], "interval": 1.0, "startTime": 900, "endTime": 900},
{"vehicle": {"length": 5.0, "width": 2.0, "maxPosAcc": 2.0, "maxNegAcc": 4.5, "usualPosAcc": 2.0, "usualNegAcc": 4.5, "minGap": 2.5, "maxSpeed": 11.111, "headwayTime": 2}, "route": ["road_4_7_2", "road_3_7_1", "road_3_8_1", "road_3_9_1", "road_3_10_1", "road_3_11_1", "road_3_12_1", "road_3_13_0"], "interval": 1.0, "startTime": 900, "endTime": 900},
{"vehicle": {"length": 5.0, "width": 2.0, "maxPosAcc": 2.0, "maxNegAcc": 4.5, "usualPosAcc": 2.0, "usualNegAcc": 4.5, "minGap": 2.5, "maxSpeed": 11.111, "headwayTime": 2}, "route": ["road_4_11_2", "road_3_11_1", "road_3_12_1", "road_3_13_1", "road_3_14_1", "road_3_15_0"], "interval": 1.0, "startTime": 900, "endTime": 900},
{"vehicle": {"length": 5.0, "width": 2.0, "maxPosAcc": 2.0, "maxNegAcc": 4.5, "usualPosAcc": 2.0, "usualNegAcc": 4.5, "minGap": 2.5, "maxSpeed": 11.111, "headwayTime": 2}, "route": ["road_4_12_2", "road_3_12_2", "road_2_12_3", "road_2_11_3", "road_2_10_3", "road_2_9_3", "road_2_8_3", "road_2_7_3", "road_2_6_3", "road_2_5_3", "road_2_4_3", "road_2_3_3", "road_2_2_3", "road_2_1_0", "road_3_1_1", "road_3_2_0"], "interval": 1.0, "startTime": 900, "endTime": 900},
{"vehicle": {"length": 5.0, "width": 2.0, "maxPosAcc": 2.0, "maxNegAcc": 4.5, "usualPosAcc": 2.0, "usualNegAcc": 4.5, "minGap": 2.5, "maxSpeed": 11.111, "headwayTime": 2}, "route": ["road_4_13_2", "road_3_13_1", "road_3_14_2", "road_2_14_3", "road_2_13_3", "road_2_12_3", "road_2_11_3", "road_2_10_3", "road_2_9_3", "road_2_8_3", "road_2_7_3", "road_2_6_3", "road_2_5_0", "road_3_5_1", "road_3_6_0"], "interval": 1.0, "startTime": 900, "endTime": 900},
{"vehicle": {"length": 5.0, "width": 2.0, "maxPosAcc": 2.0, "maxNegAcc": 4.5, "usualPosAcc": 2.0, "usualNegAcc": 4.5, "minGap": 2.5, "maxSpeed": 11.111, "headwayTime": 2}, "route": ["road_4_14_2", "road_3_14_2", "road_2_14_3", "road_2_13_3", "road_2_12_3", "road_2_11_0", "road_3_11_0"], "interval": 1.0, "startTime": 900, "endTime": 900},
{"vehicle": {"length": 5.0, "width": 2.0, "maxPosAcc": 2.0, "maxNegAcc": 4.5, "usualPosAcc": 2.0, "usualNegAcc": 4.5, "minGap": 2.5, "maxSpeed": 11.111, "headwayTime": 2}, "route": ["road_3_17_3", "road_3_16_2", "road_2_16_3", "road_2_15_3", "road_2_14_3", "road_2_13_3", "road_2_12_3", "road_2_11_3", "road_2_10_3", "road_2_9_3", "road_2_8_3", "road_2_7_3", "road_2_6_3", "road_2_5_3", "road_2_4_3", "road_2_3_3", "road_2_2_3", "road_2_1_0", "road_3_1_3"], "interval": 1.0, "startTime": 900, "endTime": 900},
{"vehicle": {"length": 5.0, "width": 2.0, "maxPosAcc": 2.0, "maxNegAcc": 4.5, "usualPosAcc": 2.0, "usualNegAcc": 4.5, "minGap": 2.5, "maxSpeed": 11.111, "headwayTime": 2}, "route": ["road_2_0_1", "road_2_1_2", "road_1_1_1", "road_1_2_1", "road_1_3_1", "road_1_4_2"], "interval": 1.0, "startTime": 900, "endTime": 900},
{"vehicle": {"length": 5.0, "width": 2.0, "maxPosAcc": 2.0, "maxNegAcc": 4.5, "usualPosAcc": 2.0, "usualNegAcc": 4.5, "minGap": 2.5, "maxSpeed": 11.111, "headwayTime": 2}, "route": ["road_1_0_1", "road_1_1_1", "road_1_2_1", "road_1_3_0", "road_2_3_0", "road_3_3_1", "road_3_4_1", "road_3_5_1", "road_3_6_1", "road_3_7_1", "road_3_8_1", "road_3_9_1", "road_3_10_1", "road_3_11_1", "road_3_12_1", "road_3_13_1", "road_3_14_0"], "interval": 1.0, "startTime": 900, "endTime": 900},
{"vehicle": {"length": 5.0, "width": 2.0, "maxPosAcc": 2.0, "maxNegAcc": 4.5, "usualPosAcc": 2.0, "usualNegAcc": 4.5, "minGap": 2.5, "maxSpeed": 11.111, "headwayTime": 2}, "route": ["road_0_7_0", "road_1_7_0", "road_2_7_3", "road_2_6_3", "road_2_5_0", "road_3_5_0"], "interval": 1.0, "startTime": 900, "endTime": 900},
{"vehicle": {"length": 5.0, "width": 2.0, "maxPosAcc": 2.0, "maxNegAcc": 4.5, "usualPosAcc": 2.0, "usualNegAcc": 4.5, "minGap": 2.5, "maxSpeed": 11.111, "headwayTime": 2}, "route": ["road_2_17_3", "road_2_16_3", "road_2_15_3", "road_2_14_3", "road_2_13_3", "road_2_12_3", "road_2_11_3", "road_2_10_3", "road_2_9_3", "road_2_8_3", "road_2_7_3", "road_2_6_3", "road_2_5_3", "road_2_4_3", "road_2_3_0", "road_3_3_0"], "interval": 1.0, "startTime": 900, "endTime": 900},
{"vehicle": {"length": 5.0, "width": 2.0, "maxPosAcc": 2.0, "maxNegAcc": 4.5, "usualPosAcc": 2.0, "usualNegAcc": 4.5, "minGap": 2.5, "maxSpeed": 11.111, "headwayTime": 2}, "route": ["road_0_10_0", "road_1_10_1", "road_1_11_0", "road_2_11_0", "road_3_11_0"], "interval": 1.0, "startTime": 900, "endTime": 900},
{"vehicle": {"length": 5.0, "width": 2.0, "maxPosAcc": 2.0, "maxNegAcc": 4.5, "usualPosAcc": 2.0, "usualNegAcc": 4.5, "minGap": 2.5, "maxSpeed": 11.111, "headwayTime": 2}, "route": ["road_4_2_2", "road_3_2_1", "road_3_3_1", "road_3_4_1", "road_3_5_1", "road_3_6_2", "road_2_6_2", "road_1_6_1", "road_1_7_2"], "interval": 1.0, "startTime": 900, "endTime": 900},
{"vehicle": {"length": 5.0, "width": 2.0, "maxPosAcc": 2.0, "maxNegAcc": 4.5, "usualPosAcc": 2.0, "usualNegAcc": 4.5, "minGap": 2.5, "maxSpeed": 11.111, "headwayTime": 2}, "route": ["road_0_15_0", "road_1_15_0", "road_2_15_3", "road_2_14_3", "road_2_13_3", "road_2_12_3", "road_2_11_3", "road_2_10_3", "road_2_9_3", "road_2_8_3", "road_2_7_3", "road_2_6_3", "road_2_5_3", "road_2_4_3", "road_2_3_3", "road_2_2_2", "road_1_2_2"], "interval": 1.0, "startTime": 902, "endTime": 902},
{"vehicle": {"length": 5.0, "width": 2.0, "maxPosAcc": 2.0, "maxNegAcc": 4.5, "usualPosAcc": 2.0, "usualNegAcc": 4.5, "minGap": 2.5, "maxSpeed": 11.111, "headwayTime": 2}, "route": ["road_4_12_2", "road_3_12_2", "road_2_12_3", "road_2_11_3", "road_2_10_3", "road_2_9_3", "road_2_8_2", "road_1_8_2"], "interval": 1.0, "startTime": 902, "endTime": 902},
{"vehicle": {"length": 5.0, "width": 2.0, "maxPosAcc": 2.0, "maxNegAcc": 4.5, "usualPosAcc": 2.0, "usualNegAcc": 4.5, "minGap": 2.5, "maxSpeed": 11.111, "headwayTime": 2}, "route": ["road_4_8_2", "road_3_8_1", "road_3_9_1", "road_3_10_1", "road_3_11_1", "road_3_12_1", "road_3_13_1", "road_3_14_0"], "interval": 1.0, "startTime": 910, "endTime": 910},
{"vehicle": {"length": 5.0, "width": 2.0, "maxPosAcc": 2.0, "maxNegAcc": 4.5, "usualPosAcc": 2.0, "usualNegAcc": 4.5, "minGap": 2.5, "maxSpeed": 11.111, "headwayTime": 2}, "route": ["road_0_13_0", "road_1_13_0", "road_2_13_3", "road_2_12_3", "road_2_11_3", "road_2_10_3", "road_2_9_3", "road_2_8_2", "road_1_8_2"], "interval": 1.0, "startTime": 911, "endTime": 911},
{"vehicle": {"length": 5.0, "width": 2.0, "maxPosAcc": 2.0, "maxNegAcc": 4.5, "usualPosAcc": 2.0, "usualNegAcc": 4.5, "minGap": 2.5, "maxSpeed": 11.111, "headwayTime": 2}, "route": ["road_1_0_1", "road_1_1_1", "road_1_2_1", "road_1_3_0", "road_2_3_0", "road_3_3_1", "road_3_4_1", "road_3_5_0"], "interval": 1.0, "startTime": 913, "endTime": 913},
{"vehicle": {"length": 5.0, "width": 2.0, "maxPosAcc": 2.0, "maxNegAcc": 4.5, "usualPosAcc": 2.0, "usualNegAcc": 4.5, "minGap": 2.5, "maxSpeed": 11.111, "headwayTime": 2}, "route": ["road_1_17_3", "road_1_16_0", "road_2_16_3", "road_2_15_3", "road_2_14_3", "road_2_13_3", "road_2_12_3", "road_2_11_3", "road_2_10_3", "road_2_9_3", "road_2_8_3", "road_2_7_3", "road_2_6_3", "road_2_5_3", "road_2_4_3", "road_2_3_0", "road_3_3_0"], "interval": 1.0, "startTime": 916, "endTime": 916},
{"vehicle": {"length": 5.0, "width": 2.0, "maxPosAcc": 2.0, "maxNegAcc": 4.5, "usualPosAcc": 2.0, "usualNegAcc": 4.5, "minGap": 2.5, "maxSpeed": 11.111, "headwayTime": 2}, "route": ["road_4_8_2", "road_3_8_2", "road_2_8_3", "road_2_7_3", "road_2_6_3", "road_2_5_3", "road_2_4_3", "road_2_3_3", "road_2_2_3", "road_2_1_0", "road_3_1_3"], "interval": 1.0, "startTime": 920, "endTime": 920},
{"vehicle": {"length": 5.0, "width": 2.0, "maxPosAcc": 2.0, "maxNegAcc": 4.5, "usualPosAcc": 2.0, "usualNegAcc": 4.5, "minGap": 2.5, "maxSpeed": 11.111, "headwayTime": 2}, "route": ["road_4_9_2", "road_3_9_1", "road_3_10_2", "road_2_10_3", "road_2_9_3", "road_2_8_3", "road_2_7_3", "road_2_6_2", "road_1_6_2"], "interval": 1.0, "startTime": 923, "endTime": 923},
{"vehicle": {"length": 5.0, "width": 2.0, "maxPosAcc": 2.0, "maxNegAcc": 4.5, "usualPosAcc": 2.0, "usualNegAcc": 4.5, "minGap": 2.5, "maxSpeed": 11.111, "headwayTime": 2}, "route": ["road_2_17_3", "road_2_16_0", "road_3_16_1"], "interval": 1.0, "startTime": 925, "endTime": 925},
{"vehicle": {"length": 5.0, "width": 2.0, "maxPosAcc": 2.0, "maxNegAcc": 4.5, "usualPosAcc": 2.0, "usualNegAcc": 4.5, "minGap": 2.5, "maxSpeed": 11.111, "headwayTime": 2}, "route": ["road_1_17_3", "road_1_16_0", "road_2_16_3", "road_2_15_3", "road_2_14_3", "road_2_13_3", "road_2_12_3", "road_2_11_3", "road_2_10_3", "road_2_9_3", "road_2_8_3", "road_2_7_3", "road_2_6_3", "road_2_5_3", "road_2_4_3", "road_2_3_3", "road_2_2_2", "road_1_2_1", "road_1_3_2"], "interval": 1.0, "startTime": 927, "endTime": 927},
{"vehicle": {"length": 5.0, "width": 2.0, "maxPosAcc": 2.0, "maxNegAcc": 4.5, "usualPosAcc": 2.0, "usualNegAcc": 4.5, "minGap": 2.5, "maxSpeed": 11.111, "headwayTime": 2}, "route": ["road_4_15_2", "road_3_15_1", "road_3_16_2", "road_2_16_3", "road_2_15_3", "road_2_14_3", "road_2_13_3", "road_2_12_3", "road_2_11_3", "road_2_10_3", "road_2_9_3", "road_2_8_3", "road_2_7_3", "road_2_6_3", "road_2_5_0", "road_3_5_0"], "interval": 1.0, "startTime": 931, "endTime": 931},
{"vehicle": {"length": 5.0, "width": 2.0, "maxPosAcc": 2.0, "maxNegAcc": 4.5, "usualPosAcc": 2.0, "usualNegAcc": 4.5, "minGap": 2.5, "maxSpeed": 11.111, "headwayTime": 2}, "route": ["road_0_9_0", "road_1_9_1", "road_1_10_1", "road_1_11_2"], "interval": 1.0, "startTime": 932, "endTime": 932},
{"vehicle": {"length": 5.0, "width": 2.0, "maxPosAcc": 2.0, "maxNegAcc": 4.5, "usualPosAcc": 2.0, "usualNegAcc": 4.5, "minGap": 2.5, "maxSpeed": 11.111, "headwayTime": 2}, "route": ["road_4_4_2", "road_3_4_2", "road_2_4_3", "road_2_3_3", "road_2_2_3", "road_2_1_0", "road_3_1_1", "road_3_2_0"], "interval": 1.0, "startTime": 935, "endTime": 935},
{"vehicle": {"length": 5.0, "width": 2.0, "maxPosAcc": 2.0, "maxNegAcc": 4.5, "usualPosAcc": 2.0, "usualNegAcc": 4.5, "minGap": 2.5, "maxSpeed": 11.111, "headwayTime": 2}, "route": ["road_4_5_2", "road_3_5_1", "road_3_6_1", "road_3_7_1", "road_3_8_1", "road_3_9_1", "road_3_10_1", "road_3_11_1", "road_3_12_1", "road_3_13_1", "road_3_14_1", "road_3_15_1", "road_3_16_1"], "interval": 1.0, "startTime": 935, "endTime": 935},
{"vehicle": {"length": 5.0, "width": 2.0, "maxPosAcc": 2.0, "maxNegAcc": 4.5, "usualPosAcc": 2.0, "usualNegAcc": 4.5, "minGap": 2.5, "maxSpeed": 11.111, "headwayTime": 2}, "route": ["road_2_0_1", "road_2_1_0", "road_3_1_1", "road_3_2_1", "road_3_3_1", "road_3_4_1", "road_3_5_1", "road_3_6_1", "road_3_7_1", "road_3_8_1", "road_3_9_1", "road_3_10_1", "road_3_11_1", "road_3_12_1", "road_3_13_1", "road_3_14_1", "road_3_15_0"], "interval": 1.0, "startTime": 935, "endTime": 935},
{"vehicle": {"length": 5.0, "width": 2.0, "maxPosAcc": 2.0, "maxNegAcc": 4.5, "usualPosAcc": 2.0, "usualNegAcc": 4.5, "minGap": 2.5, "maxSpeed": 11.111, "headwayTime": 2}, "route": ["road_4_4_2", "road_3_4_1", "road_3_5_1", "road_3_6_1", "road_3_7_1", "road_3_8_1", "road_3_9_1", "road_3_10_1", "road_3_11_1", "road_3_12_1", "road_3_13_1", "road_3_14_2", "road_2_14_2", "road_1_14_1", "road_1_15_2"], "interval": 1.0, "startTime": 940, "endTime": 940},
{"vehicle": {"length": 5.0, "width": 2.0, "maxPosAcc": 2.0, "maxNegAcc": 4.5, "usualPosAcc": 2.0, "usualNegAcc": 4.5, "minGap": 2.5, "maxSpeed": 11.111, "headwayTime": 2}, "route": ["road_1_17_3", "road_1_16_0", "road_2_16_3", "road_2_15_3", "road_2_14_3", "road_2_13_3", "road_2_12_3", "road_2_11_3", "road_2_10_3", "road_2_9_3", "road_2_8_3", "road_2_7_3", "road_2_6_3", "road_2_5_3", "road_2_4_3", "road_2_3_3", "road_2_2_3", "road_2_1_0", "road_3_1_3"], "interval": 1.0, "startTime": 941, "endTime": 941},
{"vehicle": {"length": 5.0, "width": 2.0, "maxPosAcc": 2.0, "maxNegAcc": 4.5, "usualPosAcc": 2.0, "usualNegAcc": 4.5, "minGap": 2.5, "maxSpeed": 11.111, "headwayTime": 2}, "route": ["road_4_9_2", "road_3_9_1", "road_3_10_2", "road_2_10_3", "road_2_9_3", "road_2_8_3", "road_2_7_3", "road_2_6_3", "road_2_5_3", "road_2_4_2", "road_1_4_2"], "interval": 1.0, "startTime": 942, "endTime": 942},
{"vehicle": {"length": 5.0, "width": 2.0, "maxPosAcc": 2.0, "maxNegAcc": 4.5, "usualPosAcc": 2.0, "usualNegAcc": 4.5, "minGap": 2.5, "maxSpeed": 11.111, "headwayTime": 2}, "route": ["road_3_0_1", "road_3_1_2", "road_2_1_3"], "interval": 1.0, "startTime": 945, "endTime": 945},
{"vehicle": {"length": 5.0, "width": 2.0, "maxPosAcc": 2.0, "maxNegAcc": 4.5, "usualPosAcc": 2.0, "usualNegAcc": 4.5, "minGap": 2.5, "maxSpeed": 11.111, "headwayTime": 2}, "route": ["road_4_3_2", "road_3_3_1", "road_3_4_0"], "interval": 1.0, "startTime": 946, "endTime": 946},
{"vehicle": {"length": 5.0, "width": 2.0, "maxPosAcc": 2.0, "maxNegAcc": 4.5, "usualPosAcc": 2.0, "usualNegAcc": 4.5, "minGap": 2.5, "maxSpeed": 11.111, "headwayTime": 2}, "route": ["road_4_9_2", "road_3_9_1", "road_3_10_2", "road_2_10_3", "road_2_9_3", "road_2_8_3", "road_2_7_3", "road_2_6_3", "road_2_5_3", "road_2_4_3", "road_2_3_3", "road_2_2_3", "road_2_1_0", "road_3_1_3"], "interval": 1.0, "startTime": 946, "endTime": 946},
{"vehicle": {"length": 5.0, "width": 2.0, "maxPosAcc": 2.0, "maxNegAcc": 4.5, "usualPosAcc": 2.0, "usualNegAcc": 4.5, "minGap": 2.5, "maxSpeed": 11.111, "headwayTime": 2}, "route": ["road_2_17_3", "road_2_16_3", "road_2_15_3", "road_2_14_3", "road_2_13_3", "road_2_12_3", "road_2_11_3", "road_2_10_3", "road_2_9_3", "road_2_8_3", "road_2_7_3", "road_2_6_3", "road_2_5_0", "road_3_5_0"], "interval": 1.0, "startTime": 946, "endTime": 946},
{"vehicle": {"length": 5.0, "width": 2.0, "maxPosAcc": 2.0, "maxNegAcc": 4.5, "usualPosAcc": 2.0, "usualNegAcc": 4.5, "minGap": 2.5, "maxSpeed": 11.111, "headwayTime": 2}, "route": ["road_4_2_2", "road_3_2_1", "road_3_3_0"], "interval": 1.0, "startTime": 946, "endTime": 946},
{"vehicle": {"length": 5.0, "width": 2.0, "maxPosAcc": 2.0, "maxNegAcc": 4.5, "usualPosAcc": 2.0, "usualNegAcc": 4.5, "minGap": 2.5, "maxSpeed": 11.111, "headwayTime": 2}, "route": ["road_4_10_2", "road_3_10_2", "road_2_10_3", "road_2_9_3", "road_2_8_3", "road_2_7_0", "road_3_7_0"], "interval": 1.0, "startTime": 947, "endTime": 947},
{"vehicle": {"length": 5.0, "width": 2.0, "maxPosAcc": 2.0, "maxNegAcc": 4.5, "usualPosAcc": 2.0, "usualNegAcc": 4.5, "minGap": 2.5, "maxSpeed": 11.111, "headwayTime": 2}, "route": ["road_4_9_2", "road_3_9_1", "road_3_10_2", "road_2_10_2", "road_1_10_1", "road_1_11_1", "road_1_12_2"], "interval": 1.0, "startTime": 948, "endTime": 948},
{"vehicle": {"length": 5.0, "width": 2.0, "maxPosAcc": 2.0, "maxNegAcc": 4.5, "usualPosAcc": 2.0, "usualNegAcc": 4.5, "minGap": 2.5, "maxSpeed": 11.111, "headwayTime": 2}, "route": ["road_4_8_2", "road_3_8_1", "road_3_9_1", "road_3_10_1", "road_3_11_1", "road_3_12_1", "road_3_13_1", "road_3_14_1", "road_3_15_0"], "interval": 1.0, "startTime": 950, "endTime": 950},
{"vehicle": {"length": 5.0, "width": 2.0, "maxPosAcc": 2.0, "maxNegAcc": 4.5, "usualPosAcc": 2.0, "usualNegAcc": 4.5, "minGap": 2.5, "maxSpeed": 11.111, "headwayTime": 2}, "route": ["road_0_10_0", "road_1_10_1", "road_1_11_0", "road_2_11_3", "road_2_10_3", "road_2_9_3", "road_2_8_3", "road_2_7_3", "road_2_6_3", "road_2_5_3", "road_2_4_3", "road_2_3_3", "road_2_2_2", "road_1_2_2"], "interval": 1.0, "startTime": 950, "endTime": 950},
{"vehicle": {"length": 5.0, "width": 2.0, "maxPosAcc": 2.0, "maxNegAcc": 4.5, "usualPosAcc": 2.0, "usualNegAcc": 4.5, "minGap": 2.5, "maxSpeed": 11.111, "headwayTime": 2}, "route": ["road_4_8_2", "road_3_8_2", "road_2_8_3", "road_2_7_3", "road_2_6_3", "road_2_5_3", "road_2_4_3", "road_2_3_3", "road_2_2_3", "road_2_1_3"], "interval": 1.0, "startTime": 953, "endTime": 953},
{"vehicle": {"length": 5.0, "width": 2.0, "maxPosAcc": 2.0, "maxNegAcc": 4.5, "usualPosAcc": 2.0, "usualNegAcc": 4.5, "minGap": 2.5, "maxSpeed": 11.111, "headwayTime": 2}, "route": ["road_4_2_2", "road_3_2_1", "road_3_3_1", "road_3_4_2", "road_2_4_2", "road_1_4_1", "road_1_5_1", "road_1_6_1", "road_1_7_1", "road_1_8_1", "road_1_9_1", "road_1_10_1", "road_1_11_1", "road_1_12_1", "road_1_13_2"], "interval": 1.0, "startTime": 954, "endTime": 954},
{"vehicle": {"length": 5.0, "width": 2.0, "maxPosAcc": 2.0, "maxNegAcc": 4.5, "usualPosAcc": 2.0, "usualNegAcc": 4.5, "minGap": 2.5, "maxSpeed": 11.111, "headwayTime": 2}, "route": ["road_4_8_2", "road_3_8_2", "road_2_8_3", "road_2_7_3", "road_2_6_3", "road_2_5_3", "road_2_4_3", "road_2_3_3", "road_2_2_3", "road_2_1_0", "road_3_1_3"], "interval": 1.0, "startTime": 960, "endTime": 960},
{"vehicle": {"length": 5.0, "width": 2.0, "maxPosAcc": 2.0, "maxNegAcc": 4.5, "usualPosAcc": 2.0, "usualNegAcc": 4.5, "minGap": 2.5, "maxSpeed": 11.111, "headwayTime": 2}, "route": ["road_3_0_1", "road_3_1_2", "road_2_1_2", "road_1_1_3"], "interval": 1.0, "startTime": 960, "endTime": 960},
{"vehicle": {"length": 5.0, "width": 2.0, "maxPosAcc": 2.0, "maxNegAcc": 4.5, "usualPosAcc": 2.0, "usualNegAcc": 4.5, "minGap": 2.5, "maxSpeed": 11.111, "headwayTime": 2}, "route": ["road_4_5_2", "road_3_5_1", "road_3_6_1", "road_3_7_1", "road_3_8_1", "road_3_9_1", "road_3_10_1", "road_3_11_1", "road_3_12_1", "road_3_13_1", "road_3_14_2", "road_2_14_2", "road_1_14_1", "road_1_15_1", "road_1_16_1"], "interval": 1.0, "startTime": 960, "endTime": 960},
{"vehicle": {"length": 5.0, "width": 2.0, "maxPosAcc": 2.0, "maxNegAcc": 4.5, "usualPosAcc": 2.0, "usualNegAcc": 4.5, "minGap": 2.5, "maxSpeed": 11.111, "headwayTime": 2}, "route": ["road_4_6_2", "road_3_6_2", "road_2_6_3", "road_2_5_3", "road_2_4_2", "road_1_4_2"], "interval": 1.0, "startTime": 960, "endTime": 960},
{"vehicle": {"length": 5.0, "width": 2.0, "maxPosAcc": 2.0, "maxNegAcc": 4.5, "usualPosAcc": 2.0, "usualNegAcc": 4.5, "minGap": 2.5, "maxSpeed": 11.111, "headwayTime": 2}, "route": ["road_4_7_2", "road_3_7_1", "road_3_8_2", "road_2_8_3", "road_2_7_3", "road_2_6_3", "road_2_5_3", "road_2_4_3", "road_2_3_3", "road_2_2_3", "road_2_1_0", "road_3_1_3"], "interval": 1.0, "startTime": 960, "endTime": 960},
{"vehicle": {"length": 5.0, "width": 2.0, "maxPosAcc": 2.0, "maxNegAcc": 4.5, "usualPosAcc": 2.0, "usualNegAcc": 4.5, "minGap": 2.5, "maxSpeed": 11.111, "headwayTime": 2}, "route": ["road_4_9_2", "road_3_9_1", "road_3_10_2", "road_2_10_3", "road_2_9_3", "road_2_8_3", "road_2_7_3", "road_2_6_3", "road_2_5_3", "road_2_4_3", "road_2_3_3", "road_2_2_3", "road_2_1_3"], "interval": 1.0, "startTime": 960, "endTime": 960},
{"vehicle": {"length": 5.0, "width": 2.0, "maxPosAcc": 2.0, "maxNegAcc": 4.5, "usualPosAcc": 2.0, "usualNegAcc": 4.5, "minGap": 2.5, "maxSpeed": 11.111, "headwayTime": 2}, "route": ["road_4_10_2", "road_3_10_2", "road_2_10_3", "road_2_9_3", "road_2_8_3", "road_2_7_3", "road_2_6_3", "road_2_5_3", "road_2_4_3", "road_2_3_3", "road_2_2_2", "road_1_2_2"], "interval": 1.0, "startTime": 960, "endTime": 960},
{"vehicle": {"length": 5.0, "width": 2.0, "maxPosAcc": 2.0, "maxNegAcc": 4.5, "usualPosAcc": 2.0, "usualNegAcc": 4.5, "minGap": 2.5, "maxSpeed": 11.111, "headwayTime": 2}, "route": ["road_4_11_2", "road_3_11_1", "road_3_12_2", "road_2_12_3", "road_2_11_3", "road_2_10_3", "road_2_9_3", "road_2_8_3", "road_2_7_3", "road_2_6_3", "road_2_5_3", "road_2_4_3", "road_2_3_3", "road_2_2_3", "road_2_1_3"], "interval": 1.0, "startTime": 960, "endTime": 960},
{"vehicle": {"length": 5.0, "width": 2.0, "maxPosAcc": 2.0, "maxNegAcc": 4.5, "usualPosAcc": 2.0, "usualNegAcc": 4.5, "minGap": 2.5, "maxSpeed": 11.111, "headwayTime": 2}, "route": ["road_4_12_2", "road_3_12_2", "road_2_12_3", "road_2_11_3", "road_2_10_3", "road_2_9_3", "road_2_8_2", "road_1_8_1", "road_1_9_2"], "interval": 1.0, "startTime": 960, "endTime": 960},
{"vehicle": {"length": 5.0, "width": 2.0, "maxPosAcc": 2.0, "maxNegAcc": 4.5, "usualPosAcc": 2.0, "usualNegAcc": 4.5, "minGap": 2.5, "maxSpeed": 11.111, "headwayTime": 2}, "route": ["road_3_17_3", "road_3_16_2", "road_2_16_3", "road_2_15_3", "road_2_14_3", "road_2_13_3", "road_2_12_3", "road_2_11_0", "road_3_11_1", "road_3_12_0"], "interval": 1.0, "startTime": 960, "endTime": 960},
{"vehicle": {"length": 5.0, "width": 2.0, "maxPosAcc": 2.0, "maxNegAcc": 4.5, "usualPosAcc": 2.0, "usualNegAcc": 4.5, "minGap": 2.5, "maxSpeed": 11.111, "headwayTime": 2}, "route": ["road_2_0_1", "road_2_1_0", "road_3_1_1", "road_3_2_1", "road_3_3_1", "road_3_4_1", "road_3_5_1", "road_3_6_1", "road_3_7_1", "road_3_8_0"], "interval": 1.0, "startTime": 960, "endTime": 960},
{"vehicle": {"length": 5.0, "width": 2.0, "maxPosAcc": 2.0, "maxNegAcc": 4.5, "usualPosAcc": 2.0, "usualNegAcc": 4.5, "minGap": 2.5, "maxSpeed": 11.111, "headwayTime": 2}, "route": ["road_1_0_1", "road_1_1_0", "road_2_1_0", "road_3_1_3"], "interval": 1.0, "startTime": 960, "endTime": 960},
{"vehicle": {"length": 5.0, "width": 2.0, "maxPosAcc": 2.0, "maxNegAcc": 4.5, "usualPosAcc": 2.0, "usualNegAcc": 4.5, "minGap": 2.5, "maxSpeed": 11.111, "headwayTime": 2}, "route": ["road_0_9_0", "road_1_9_0", "road_2_9_3", "road_2_8_3", "road_2_7_0", "road_3_7_1", "road_3_8_0"], "interval": 1.0, "startTime": 960, "endTime": 960},
{"vehicle": {"length": 5.0, "width": 2.0, "maxPosAcc": 2.0, "maxNegAcc": 4.5, "usualPosAcc": 2.0, "usualNegAcc": 4.5, "minGap": 2.5, "maxSpeed": 11.111, "headwayTime": 2}, "route": ["road_2_17_3", "road_2_16_0", "road_3_16_1"], "interval": 1.0, "startTime": 960, "endTime": 960},
{"vehicle": {"length": 5.0, "width": 2.0, "maxPosAcc": 2.0, "maxNegAcc": 4.5, "usualPosAcc": 2.0, "usualNegAcc": 4.5, "minGap": 2.5, "maxSpeed": 11.111, "headwayTime": 2}, "route": ["road_0_11_0", "road_1_11_0", "road_2_11_3", "road_2_10_3", "road_2_9_3", "road_2_8_3", "road_2_7_3", "road_2_6_3", "road_2_5_0", "road_3_5_1", "road_3_6_0"], "interval": 1.0, "startTime": 960, "endTime": 960},
{"vehicle": {"length": 5.0, "width": 2.0, "maxPosAcc": 2.0, "maxNegAcc": 4.5, "usualPosAcc": 2.0, "usualNegAcc": 4.5, "minGap": 2.5, "maxSpeed": 11.111, "headwayTime": 2}, "route": ["road_0_6_0", "road_1_6_1", "road_1_7_0", "road_2_7_3", "road_2_6_3", "road_2_5_3", "road_2_4_3", "road_2_3_3", "road_2_2_3", "road_2_1_3"], "interval": 1.0, "startTime": 960, "endTime": 960},
{"vehicle": {"length": 5.0, "width": 2.0, "maxPosAcc": 2.0, "maxNegAcc": 4.5, "usualPosAcc": 2.0, "usualNegAcc": 4.5, "minGap": 2.5, "maxSpeed": 11.111, "headwayTime": 2}, "route": ["road_1_17_3", "road_1_16_0", "road_2_16_3", "road_2_15_3", "road_2_14_3", "road_2_13_3", "road_2_12_3", "road_2_11_0", "road_3_11_1", "road_3_12_0"], "interval": 1.0, "startTime": 960, "endTime": 960},
{"vehicle": {"length": 5.0, "width": 2.0, "maxPosAcc": 2.0, "maxNegAcc": 4.5, "usualPosAcc": 2.0, "usualNegAcc": 4.5, "minGap": 2.5, "maxSpeed": 11.111, "headwayTime": 2}, "route": ["road_3_0_1", "road_3_1_1", "road_3_2_1", "road_3_3_1", "road_3_4_1", "road_3_5_1", "road_3_6_1", "road_3_7_1", "road_3_8_1", "road_3_9_1", "road_3_10_1", "road_3_11_1", "road_3_12_1", "road_3_13_1", "road_3_14_1", "road_3_15_1", "road_3_16_1"], "interval": 1.0, "startTime": 962, "endTime": 962},
{"vehicle": {"length": 5.0, "width": 2.0, "maxPosAcc": 2.0, "maxNegAcc": 4.5, "usualPosAcc": 2.0, "usualNegAcc": 4.5, "minGap": 2.5, "maxSpeed": 11.111, "headwayTime": 2}, "route": ["road_4_2_2", "road_3_2_1", "road_3_3_1", "road_3_4_1", "road_3_5_1", "road_3_6_1", "road_3_7_1", "road_3_8_1", "road_3_9_1", "road_3_10_1", "road_3_11_1", "road_3_12_1", "road_3_13_1", "road_3_14_1", "road_3_15_1", "road_3_16_2", "road_2_16_1"], "interval": 1.0, "startTime": 963, "endTime": 963},
{"vehicle": {"length": 5.0, "width": 2.0, "maxPosAcc": 2.0, "maxNegAcc": 4.5, "usualPosAcc": 2.0, "usualNegAcc": 4.5, "minGap": 2.5, "maxSpeed": 11.111, "headwayTime": 2}, "route": ["road_4_6_2", "road_3_6_1", "road_3_7_1", "road_3_8_1", "road_3_9_1", "road_3_10_0"], "interval": 1.0, "startTime": 967, "endTime": 967},
{"vehicle": {"length": 5.0, "width": 2.0, "maxPosAcc": 2.0, "maxNegAcc": 4.5, "usualPosAcc": 2.0, "usualNegAcc": 4.5, "minGap": 2.5, "maxSpeed": 11.111, "headwayTime": 2}, "route": ["road_3_0_1", "road_3_1_1", "road_3_2_1", "road_3_3_1", "road_3_4_1", "road_3_5_1", "road_3_6_1", "road_3_7_1", "road_3_8_1", "road_3_9_1", "road_3_10_1", "road_3_11_1", "road_3_12_0"], "interval": 1.0, "startTime": 969, "endTime": 969},
{"vehicle": {"length": 5.0, "width": 2.0, "maxPosAcc": 2.0, "maxNegAcc": 4.5, "usualPosAcc": 2.0, "usualNegAcc": 4.5, "minGap": 2.5, "maxSpeed": 11.111, "headwayTime": 2}, "route": ["road_4_7_2", "road_3_7_1", "road_3_8_1", "road_3_9_1", "road_3_10_1", "road_3_11_1", "road_3_12_1", "road_3_13_1", "road_3_14_0"], "interval": 1.0, "startTime": 969, "endTime": 969},
{"vehicle": {"length": 5.0, "width": 2.0, "maxPosAcc": 2.0, "maxNegAcc": 4.5, "usualPosAcc": 2.0, "usualNegAcc": 4.5, "minGap": 2.5, "maxSpeed": 11.111, "headwayTime": 2}, "route": ["road_4_10_2", "road_3_10_1", "road_3_11_1", "road_3_12_1", "road_3_13_1", "road_3_14_1", "road_3_15_1", "road_3_16_2", "road_2_16_1"], "interval": 1.0, "startTime": 969, "endTime": 969},
{"vehicle": {"length": 5.0, "width": 2.0, "maxPosAcc": 2.0, "maxNegAcc": 4.5, "usualPosAcc": 2.0, "usualNegAcc": 4.5, "minGap": 2.5, "maxSpeed": 11.111, "headwayTime": 2}, "route": ["road_4_7_2", "road_3_7_1", "road_3_8_2", "road_2_8_3", "road_2_7_3", "road_2_6_3", "road_2_5_3", "road_2_4_3", "road_2_3_3", "road_2_2_3", "road_2_1_3"], "interval": 1.0, "startTime": 971, "endTime": 971},
{"vehicle": {"length": 5.0, "width": 2.0, "maxPosAcc": 2.0, "maxNegAcc": 4.5, "usualPosAcc": 2.0, "usualNegAcc": 4.5, "minGap": 2.5, "maxSpeed": 11.111, "headwayTime": 2}, "route": ["road_4_13_2", "road_3_13_1", "road_3_14_2", "road_2_14_3", "road_2_13_3", "road_2_12_3", "road_2_11_3", "road_2_10_3", "road_2_9_3", "road_2_8_3", "road_2_7_3", "road_2_6_2", "road_1_6_1", "road_1_7_2"], "interval": 1.0, "startTime": 976, "endTime": 976},
{"vehicle": {"length": 5.0, "width": 2.0, "maxPosAcc": 2.0, "maxNegAcc": 4.5, "usualPosAcc": 2.0, "usualNegAcc": 4.5, "minGap": 2.5, "maxSpeed": 11.111, "headwayTime": 2}, "route": ["road_4_7_2", "road_3_7_1", "road_3_8_2", "road_2_8_3", "road_2_7_3", "road_2_6_3", "road_2_5_3", "road_2_4_3", "road_2_3_0", "road_3_3_1", "road_3_4_0"], "interval": 1.0, "startTime": 977, "endTime": 977},
{"vehicle": {"length": 5.0, "width": 2.0, "maxPosAcc": 2.0, "maxNegAcc": 4.5, "usualPosAcc": 2.0, "usualNegAcc": 4.5, "minGap": 2.5, "maxSpeed": 11.111, "headwayTime": 2}, "route": ["road_4_9_2", "road_3_9_1", "road_3_10_2", "road_2_10_2", "road_1_10_2"], "interval": 1.0, "startTime": 977, "endTime": 977},
{"vehicle": {"length": 5.0, "width": 2.0, "maxPosAcc": 2.0, "maxNegAcc": 4.5, "usualPosAcc": 2.0, "usualNegAcc": 4.5, "minGap": 2.5, "maxSpeed": 11.111, "headwayTime": 2}, "route": ["road_4_13_2", "road_3_13_1", "road_3_14_2", "road_2_14_3", "road_2_13_3", "road_2_12_3", "road_2_11_0", "road_3_11_0"], "interval": 1.0, "startTime": 985, "endTime": 985},
{"vehicle": {"length": 5.0, "width": 2.0, "maxPosAcc": 2.0, "maxNegAcc": 4.5, "usualPosAcc": 2.0, "usualNegAcc": 4.5, "minGap": 2.5, "maxSpeed": 11.111, "headwayTime": 2}, "route": ["road_4_3_2", "road_3_3_1", "road_3_4_2", "road_2_4_3", "road_2_3_3", "road_2_2_3", "road_2_1_3"], "interval": 1.0, "startTime": 987, "endTime": 987},
{"vehicle": {"length": 5.0, "width": 2.0, "maxPosAcc": 2.0, "maxNegAcc": 4.5, "usualPosAcc": 2.0, "usualNegAcc": 4.5, "minGap": 2.5, "maxSpeed": 11.111, "headwayTime": 2}, "route": ["road_0_5_0", "road_1_5_1", "road_1_6_1", "road_1_7_1", "road_1_8_1", "road_1_9_1", "road_1_10_1", "road_1_11_2"], "interval": 1.0, "startTime": 987, "endTime": 987},
{"vehicle": {"length": 5.0, "width": 2.0, "maxPosAcc": 2.0, "maxNegAcc": 4.5, "usualPosAcc": 2.0, "usualNegAcc": 4.5, "minGap": 2.5, "maxSpeed": 11.111, "headwayTime": 2}, "route": ["road_2_17_3", "road_2_16_3", "road_2_15_3", "road_2_14_3", "road_2_13_3", "road_2_12_3", "road_2_11_3", "road_2_10_3", "road_2_9_3", "road_2_8_3", "road_2_7_3", "road_2_6_3", "road_2_5_3", "road_2_4_2", "road_1_4_2"], "interval": 1.0, "startTime": 989, "endTime": 989},
{"vehicle": {"length": 5.0, "width": 2.0, "maxPosAcc": 2.0, "maxNegAcc": 4.5, "usualPosAcc": 2.0, "usualNegAcc": 4.5, "minGap": 2.5, "maxSpeed": 11.111, "headwayTime": 2}, "route": ["road_4_3_2", "road_3_3_1", "road_3_4_1", "road_3_5_1", "road_3_6_1", "road_3_7_0"], "interval": 1.0, "startTime": 993, "endTime": 993},
{"vehicle": {"length": 5.0, "width": 2.0, "maxPosAcc": 2.0, "maxNegAcc": 4.5, "usualPosAcc": 2.0, "usualNegAcc": 4.5, "minGap": 2.5, "maxSpeed": 11.111, "headwayTime": 2}, "route": ["road_4_4_2", "road_3_4_2", "road_2_4_3", "road_2_3_3", "road_2_2_3", "road_2_1_2", "road_1_1_3"], "interval": 1.0, "startTime": 994, "endTime": 994},
{"vehicle": {"length": 5.0, "width": 2.0, "maxPosAcc": 2.0, "maxNegAcc": 4.5, "usualPosAcc": 2.0, "usualNegAcc": 4.5, "minGap": 2.5, "maxSpeed": 11.111, "headwayTime": 2}, "route": ["road_1_0_1", "road_1_1_1", "road_1_2_1", "road_1_3_0", "road_2_3_0", "road_3_3_1", "road_3_4_1", "road_3_5_1", "road_3_6_1", "road_3_7_1", "road_3_8_1", "road_3_9_1", "road_3_10_1", "road_3_11_1", "road_3_12_1", "road_3_13_1", "road_3_14_1", "road_3_15_0"], "interval": 1.0, "startTime": 997, "endTime": 997},
{"vehicle": {"length": 5.0, "width": 2.0, "maxPosAcc": 2.0, "maxNegAcc": 4.5, "usualPosAcc": 2.0, "usualNegAcc": 4.5, "minGap": 2.5, "maxSpeed": 11.111, "headwayTime": 2}, "route": ["road_3_17_3", "road_3_16_2", "road_2_16_3", "road_2_15_3", "road_2_14_3", "road_2_13_3", "road_2_12_3", "road_2_11_3", "road_2_10_3", "road_2_9_3", "road_2_8_3", "road_2_7_3", "road_2_6_3", "road_2_5_3", "road_2_4_3", "road_2_3_3", "road_2_2_3", "road_2_1_0", "road_3_1_3"], "interval": 1.0, "startTime": 1001, "endTime": 1001},
{"vehicle": {"length": 5.0, "width": 2.0, "maxPosAcc": 2.0, "maxNegAcc": 4.5, "usualPosAcc": 2.0, "usualNegAcc": 4.5, "minGap": 2.5, "maxSpeed": 11.111, "headwayTime": 2}, "route": ["road_3_0_1", "road_3_1_2", "road_2_1_3"], "interval": 1.0, "startTime": 1003, "endTime": 1003},
{"vehicle": {"length": 5.0, "width": 2.0, "maxPosAcc": 2.0, "maxNegAcc": 4.5, "usualPosAcc": 2.0, "usualNegAcc": 4.5, "minGap": 2.5, "maxSpeed": 11.111, "headwayTime": 2}, "route": ["road_3_17_3", "road_3_16_2", "road_2_16_3", "road_2_15_3", "road_2_14_3", "road_2_13_3", "road_2_12_3", "road_2_11_3", "road_2_10_3", "road_2_9_0", "road_3_9_0"], "interval": 1.0, "startTime": 1003, "endTime": 1003},
{"vehicle": {"length": 5.0, "width": 2.0, "maxPosAcc": 2.0, "maxNegAcc": 4.5, "usualPosAcc": 2.0, "usualNegAcc": 4.5, "minGap": 2.5, "maxSpeed": 11.111, "headwayTime": 2}, "route": ["road_2_0_1", "road_2_1_0", "road_3_1_1", "road_3_2_1", "road_3_3_1", "road_3_4_1", "road_3_5_1", "road_3_6_1", "road_3_7_1", "road_3_8_1", "road_3_9_1", "road_3_10_1", "road_3_11_1", "road_3_12_1", "road_3_13_1", "road_3_14_1", "road_3_15_1", "road_3_16_2", "road_2_16_1"], "interval": 1.0, "startTime": 1003, "endTime": 1003},
{"vehicle": {"length": 5.0, "width": 2.0, "maxPosAcc": 2.0, "maxNegAcc": 4.5, "usualPosAcc": 2.0, "usualNegAcc": 4.5, "minGap": 2.5, "maxSpeed": 11.111, "headwayTime": 2}, "route": ["road_2_0_1", "road_2_1_2", "road_1_1_1", "road_1_2_1", "road_1_3_1", "road_1_4_1", "road_1_5_1", "road_1_6_1", "road_1_7_1", "road_1_8_1", "road_1_9_1", "road_1_10_1", "road_1_11_1", "road_1_12_1", "road_1_13_1", "road_1_14_1", "road_1_15_1", "road_1_16_1"], "interval": 1.0, "startTime": 1004, "endTime": 1004},
{"vehicle": {"length": 5.0, "width": 2.0, "maxPosAcc": 2.0, "maxNegAcc": 4.5, "usualPosAcc": 2.0, "usualNegAcc": 4.5, "minGap": 2.5, "maxSpeed": 11.111, "headwayTime": 2}, "route": ["road_4_11_2", "road_3_11_1", "road_3_12_1", "road_3_13_1", "road_3_14_1", "road_3_15_1", "road_3_16_1"], "interval": 1.0, "startTime": 1005, "endTime": 1005},
{"vehicle": {"length": 5.0, "width": 2.0, "maxPosAcc": 2.0, "maxNegAcc": 4.5, "usualPosAcc": 2.0, "usualNegAcc": 4.5, "minGap": 2.5, "maxSpeed": 11.111, "headwayTime": 2}, "route": ["road_4_5_2", "road_3_5_1", "road_3_6_1", "road_3_7_1", "road_3_8_0"], "interval": 1.0, "startTime": 1007, "endTime": 1007},
{"vehicle": {"length": 5.0, "width": 2.0, "maxPosAcc": 2.0, "maxNegAcc": 4.5, "usualPosAcc": 2.0, "usualNegAcc": 4.5, "minGap": 2.5, "maxSpeed": 11.111, "headwayTime": 2}, "route": ["road_2_17_3", "road_2_16_3", "road_2_15_3", "road_2_14_3", "road_2_13_3", "road_2_12_3", "road_2_11_3", "road_2_10_3", "road_2_9_3", "road_2_8_3", "road_2_7_3", "road_2_6_3", "road_2_5_3", "road_2_4_3", "road_2_3_3", "road_2_2_2", "road_1_2_1", "road_1_3_2"], "interval": 1.0, "startTime": 1008, "endTime": 1008},
{"vehicle": {"length": 5.0, "width": 2.0, "maxPosAcc": 2.0, "maxNegAcc": 4.5, "usualPosAcc": 2.0, "usualNegAcc": 4.5, "minGap": 2.5, "maxSpeed": 11.111, "headwayTime": 2}, "route": ["road_4_9_2", "road_3_9_1", "road_3_10_2", "road_2_10_3", "road_2_9_3", "road_2_8_3", "road_2_7_3", "road_2_6_3", "road_2_5_3", "road_2_4_2", "road_1_4_1", "road_1_5_2"], "interval": 1.0, "startTime": 1009, "endTime": 1009},
{"vehicle": {"length": 5.0, "width": 2.0, "maxPosAcc": 2.0, "maxNegAcc": 4.5, "usualPosAcc": 2.0, "usualNegAcc": 4.5, "minGap": 2.5, "maxSpeed": 11.111, "headwayTime": 2}, "route": ["road_3_0_1", "road_3_1_1", "road_3_2_1", "road_3_3_1", "road_3_4_1", "road_3_5_1", "road_3_6_1", "road_3_7_1", "road_3_8_1", "road_3_9_1", "road_3_10_1", "road_3_11_1", "road_3_12_1", "road_3_13_1", "road_3_14_1", "road_3_15_0"], "interval": 1.0, "startTime": 1011, "endTime": 1011},
{"vehicle": {"length": 5.0, "width": 2.0, "maxPosAcc": 2.0, "maxNegAcc": 4.5, "usualPosAcc": 2.0, "usualNegAcc": 4.5, "minGap": 2.5, "maxSpeed": 11.111, "headwayTime": 2}, "route": ["road_3_17_3", "road_3_16_2", "road_2_16_3", "road_2_15_3", "road_2_14_3", "road_2_13_3", "road_2_12_3", "road_2_11_3", "road_2_10_3", "road_2_9_3", "road_2_8_3", "road_2_7_3", "road_2_6_3", "road_2_5_3", "road_2_4_3", "road_2_3_3", "road_2_2_3", "road_2_1_0", "road_3_1_3"], "interval": 1.0, "startTime": 1013, "endTime": 1013},
{"vehicle": {"length": 5.0, "width": 2.0, "maxPosAcc": 2.0, "maxNegAcc": 4.5, "usualPosAcc": 2.0, "usualNegAcc": 4.5, "minGap": 2.5, "maxSpeed": 11.111, "headwayTime": 2}, "route": ["road_3_17_3", "road_3_16_2", "road_2_16_3", "road_2_15_3", "road_2_14_3", "road_2_13_3", "road_2_12_3", "road_2_11_3", "road_2_10_3", "road_2_9_3", "road_2_8_3", "road_2_7_3", "road_2_6_2", "road_1_6_2"], "interval": 1.0, "startTime": 1014, "endTime": 1014},
{"vehicle": {"length": 5.0, "width": 2.0, "maxPosAcc": 2.0, "maxNegAcc": 4.5, "usualPosAcc": 2.0, "usualNegAcc": 4.5, "minGap": 2.5, "maxSpeed": 11.111, "headwayTime": 2}, "route": ["road_4_2_2", "road_3_2_1", "road_3_3_1", "road_3_4_1", "road_3_5_1", "road_3_6_1", "road_3_7_1", "road_3_8_1", "road_3_9_1", "road_3_10_1", "road_3_11_1", "road_3_12_1", "road_3_13_0"], "interval": 1.0, "startTime": 1014, "endTime": 1014},
{"vehicle": {"length": 5.0, "width": 2.0, "maxPosAcc": 2.0, "maxNegAcc": 4.5, "usualPosAcc": 2.0, "usualNegAcc": 4.5, "minGap": 2.5, "maxSpeed": 11.111, "headwayTime": 2}, "route": ["road_3_0_1", "road_3_1_1", "road_3_2_1", "road_3_3_1", "road_3_4_1", "road_3_5_1", "road_3_6_1", "road_3_7_1", "road_3_8_1", "road_3_9_1", "road_3_10_1", "road_3_11_1", "road_3_12_0"], "interval": 1.0, "startTime": 1015, "endTime": 1015},
{"vehicle": {"length": 5.0, "width": 2.0, "maxPosAcc": 2.0, "maxNegAcc": 4.5, "usualPosAcc": 2.0, "usualNegAcc": 4.5, "minGap": 2.5, "maxSpeed": 11.111, "headwayTime": 2}, "route": ["road_4_6_2", "road_3_6_2", "road_2_6_3", "road_2_5_3", "road_2_4_3", "road_2_3_3", "road_2_2_3", "road_2_1_3"], "interval": 1.0, "startTime": 1017, "endTime": 1017},
{"vehicle": {"length": 5.0, "width": 2.0, "maxPosAcc": 2.0, "maxNegAcc": 4.5, "usualPosAcc": 2.0, "usualNegAcc": 4.5, "minGap": 2.5, "maxSpeed": 11.111, "headwayTime": 2}, "route": ["road_0_12_0", "road_1_12_1", "road_1_13_0", "road_2_13_3", "road_2_12_3", "road_2_11_3", "road_2_10_3", "road_2_9_3", "road_2_8_3", "road_2_7_3", "road_2_6_3", "road_2_5_3", "road_2_4_3", "road_2_3_0", "road_3_3_1", "road_3_4_0"], "interval": 1.0, "startTime": 1017, "endTime": 1017},
{"vehicle": {"length": 5.0, "width": 2.0, "maxPosAcc": 2.0, "maxNegAcc": 4.5, "usualPosAcc": 2.0, "usualNegAcc": 4.5, "minGap": 2.5, "maxSpeed": 11.111, "headwayTime": 2}, "route": ["road_1_17_3", "road_1_16_0", "road_2_16_0", "road_3_16_1"], "interval": 1.0, "startTime": 1018, "endTime": 1018},
{"vehicle": {"length": 5.0, "width": 2.0, "maxPosAcc": 2.0, "maxNegAcc": 4.5, "usualPosAcc": 2.0, "usualNegAcc": 4.5, "minGap": 2.5, "maxSpeed": 11.111, "headwayTime": 2}, "route": ["road_0_4_0", "road_1_4_1", "road_1_5_0", "road_2_5_0", "road_3_5_0"], "interval": 1.0, "startTime": 1019, "endTime": 1019},
{"vehicle": {"length": 5.0, "width": 2.0, "maxPosAcc": 2.0, "maxNegAcc": 4.5, "usualPosAcc": 2.0, "usualNegAcc": 4.5, "minGap": 2.5, "maxSpeed": 11.111, "headwayTime": 2}, "route": ["road_0_8_0", "road_1_8_1", "road_1_9_0", "road_2_9_0", "road_3_9_1", "road_3_10_1", "road_3_11_1", "road_3_12_1", "road_3_13_0"], "interval": 1.0, "startTime": 1020, "endTime": 1020},
{"vehicle": {"length": 5.0, "width": 2.0, "maxPosAcc": 2.0, "maxNegAcc": 4.5, "usualPosAcc": 2.0, "usualNegAcc": 4.5, "minGap": 2.5, "maxSpeed": 11.111, "headwayTime": 2}, "route": ["road_3_0_1", "road_3_1_1", "road_3_2_1", "road_3_3_1", "road_3_4_1", "road_3_5_1", "road_3_6_1", "road_3_7_1", "road_3_8_1", "road_3_9_1", "road_3_10_1", "road_3_11_1", "road_3_12_1", "road_3_13_1", "road_3_14_1", "road_3_15_1", "road_3_16_1"], "interval": 1.0, "startTime": 1020, "endTime": 1020},
{"vehicle": {"length": 5.0, "width": 2.0, "maxPosAcc": 2.0, "maxNegAcc": 4.5, "usualPosAcc": 2.0, "usualNegAcc": 4.5, "minGap": 2.5, "maxSpeed": 11.111, "headwayTime": 2}, "route": ["road_4_3_2", "road_3_3_1", "road_3_4_1", "road_3_5_1", "road_3_6_2", "road_2_6_2", "road_1_6_1", "road_1_7_2"], "interval": 1.0, "startTime": 1020, "endTime": 1020},
{"vehicle": {"length": 5.0, "width": 2.0, "maxPosAcc": 2.0, "maxNegAcc": 4.5, "usualPosAcc": 2.0, "usualNegAcc": 4.5, "minGap": 2.5, "maxSpeed": 11.111, "headwayTime": 2}, "route": ["road_4_5_2", "road_3_5_1", "road_3_6_1", "road_3_7_1", "road_3_8_1", "road_3_9_1", "road_3_10_1", "road_3_11_1", "road_3_12_1", "road_3_13_0"], "interval": 1.0, "startTime": 1020, "endTime": 1020},
{"vehicle": {"length": 5.0, "width": 2.0, "maxPosAcc": 2.0, "maxNegAcc": 4.5, "usualPosAcc": 2.0, "usualNegAcc": 4.5, "minGap": 2.5, "maxSpeed": 11.111, "headwayTime": 2}, "route": ["road_4_6_2", "road_3_6_2", "road_2_6_3", "road_2_5_3", "road_2_4_2", "road_1_4_2"], "interval": 1.0, "startTime": 1020, "endTime": 1020},
{"vehicle": {"length": 5.0, "width": 2.0, "maxPosAcc": 2.0, "maxNegAcc": 4.5, "usualPosAcc": 2.0, "usualNegAcc": 4.5, "minGap": 2.5, "maxSpeed": 11.111, "headwayTime": 2}, "route": ["road_4_9_2", "road_3_9_1", "road_3_10_2", "road_2_10_3", "road_2_9_3", "road_2_8_3", "road_2_7_3", "road_2_6_3", "road_2_5_3", "road_2_4_3", "road_2_3_3", "road_2_2_3", "road_2_1_2", "road_1_1_3"], "interval": 1.0, "startTime": 1020, "endTime": 1020},
{"vehicle": {"length": 5.0, "width": 2.0, "maxPosAcc": 2.0, "maxNegAcc": 4.5, "usualPosAcc": 2.0, "usualNegAcc": 4.5, "minGap": 2.5, "maxSpeed": 11.111, "headwayTime": 2}, "route": ["road_4_10_2", "road_3_10_2", "road_2_10_3", "road_2_9_3", "road_2_8_3", "road_2_7_0", "road_3_7_1", "road_3_8_0"], "interval": 1.0, "startTime": 1020, "endTime": 1020},
{"vehicle": {"length": 5.0, "width": 2.0, "maxPosAcc": 2.0, "maxNegAcc": 4.5, "usualPosAcc": 2.0, "usualNegAcc": 4.5, "minGap": 2.5, "maxSpeed": 11.111, "headwayTime": 2}, "route": ["road_4_12_2", "road_3_12_2", "road_2_12_3", "road_2_11_3", "road_2_10_3", "road_2_9_3", "road_2_8_3", "road_2_7_3", "road_2_6_3", "road_2_5_3", "road_2_4_3", "road_2_3_0", "road_3_3_1", "road_3_4_0"], "interval": 1.0, "startTime": 1020, "endTime": 1020},
{"vehicle": {"length": 5.0, "width": 2.0, "maxPosAcc": 2.0, "maxNegAcc": 4.5, "usualPosAcc": 2.0, "usualNegAcc": 4.5, "minGap": 2.5, "maxSpeed": 11.111, "headwayTime": 2}, "route": ["road_4_14_2", "road_3_14_2", "road_2_14_3", "road_2_13_3", "road_2_12_3", "road_2_11_3", "road_2_10_3", "road_2_9_3", "road_2_8_3", "road_2_7_3", "road_2_6_3", "road_2_5_3", "road_2_4_3", "road_2_3_0", "road_3_3_1", "road_3_4_0"], "interval": 1.0, "startTime": 1020, "endTime": 1020},
{"vehicle": {"length": 5.0, "width": 2.0, "maxPosAcc": 2.0, "maxNegAcc": 4.5, "usualPosAcc": 2.0, "usualNegAcc": 4.5, "minGap": 2.5, "maxSpeed": 11.111, "headwayTime": 2}, "route": ["road_3_17_3", "road_3_16_2", "road_2_16_3", "road_2_15_3", "road_2_14_3", "road_2_13_3", "road_2_12_3", "road_2_11_3", "road_2_10_3", "road_2_9_3", "road_2_8_3", "road_2_7_3", "road_2_6_3", "road_2_5_3", "road_2_4_3", "road_2_3_3", "road_2_2_3", "road_2_1_0", "road_3_1_3"], "interval": 1.0, "startTime": 1020, "endTime": 1020},
{"vehicle": {"length": 5.0, "width": 2.0, "maxPosAcc": 2.0, "maxNegAcc": 4.5, "usualPosAcc": 2.0, "usualNegAcc": 4.5, "minGap": 2.5, "maxSpeed": 11.111, "headwayTime": 2}, "route": ["road_2_0_1", "road_2_1_0", "road_3_1_1", "road_3_2_1", "road_3_3_1", "road_3_4_1", "road_3_5_1", "road_3_6_1", "road_3_7_0"], "interval": 1.0, "startTime": 1020, "endTime": 1020},
{"vehicle": {"length": 5.0, "width": 2.0, "maxPosAcc": 2.0, "maxNegAcc": 4.5, "usualPosAcc": 2.0, "usualNegAcc": 4.5, "minGap": 2.5, "maxSpeed": 11.111, "headwayTime": 2}, "route": ["road_1_0_1", "road_1_1_0", "road_2_1_0", "road_3_1_3"], "interval": 1.0, "startTime": 1020, "endTime": 1020},
{"vehicle": {"length": 5.0, "width": 2.0, "maxPosAcc": 2.0, "maxNegAcc": 4.5, "usualPosAcc": 2.0, "usualNegAcc": 4.5, "minGap": 2.5, "maxSpeed": 11.111, "headwayTime": 2}, "route": ["road_0_7_0", "road_1_7_0", "road_2_7_3", "road_2_6_3", "road_2_5_3", "road_2_4_3", "road_2_3_0", "road_3_3_1", "road_3_4_0"], "interval": 1.0, "startTime": 1020, "endTime": 1020},
{"vehicle": {"length": 5.0, "width": 2.0, "maxPosAcc": 2.0, "maxNegAcc": 4.5, "usualPosAcc": 2.0, "usualNegAcc": 4.5, "minGap": 2.5, "maxSpeed": 11.111, "headwayTime": 2}, "route": ["road_2_17_3", "road_2_16_3", "road_2_15_3", "road_2_14_3", "road_2_13_3", "road_2_12_3", "road_2_11_3", "road_2_10_3", "road_2_9_3", "road_2_8_3", "road_2_7_0", "road_3_7_0"], "interval": 1.0, "startTime": 1020, "endTime": 1020},
{"vehicle": {"length": 5.0, "width": 2.0, "maxPosAcc": 2.0, "maxNegAcc": 4.5, "usualPosAcc": 2.0, "usualNegAcc": 4.5, "minGap": 2.5, "maxSpeed": 11.111, "headwayTime": 2}, "route": ["road_0_11_0", "road_1_11_0", "road_2_11_3", "road_2_10_3", "road_2_9_3", "road_2_8_3", "road_2_7_3", "road_2_6_3", "road_2_5_3", "road_2_4_3", "road_2_3_0", "road_3_3_1", "road_3_4_0"], "interval": 1.0, "startTime": 1020, "endTime": 1020},
{"vehicle": {"length": 5.0, "width": 2.0, "maxPosAcc": 2.0, "maxNegAcc": 4.5, "usualPosAcc": 2.0, "usualNegAcc": 4.5, "minGap": 2.5, "maxSpeed": 11.111, "headwayTime": 2}, "route": ["road_0_10_0", "road_1_10_1", "road_1_11_0", "road_2_11_3", "road_2_10_3", "road_2_9_3", "road_2_8_2", "road_1_8_2"], "interval": 1.0, "startTime": 1020, "endTime": 1020},
{"vehicle": {"length": 5.0, "width": 2.0, "maxPosAcc": 2.0, "maxNegAcc": 4.5, "usualPosAcc": 2.0, "usualNegAcc": 4.5, "minGap": 2.5, "maxSpeed": 11.111, "headwayTime": 2}, "route": ["road_1_17_3", "road_1_16_0", "road_2_16_3", "road_2_15_3", "road_2_14_3", "road_2_13_3", "road_2_12_3", "road_2_11_3", "road_2_10_3", "road_2_9_3", "road_2_8_3", "road_2_7_0", "road_3_7_1", "road_3_8_0"], "interval": 1.0, "startTime": 1020, "endTime": 1020},
{"vehicle": {"length": 5.0, "width": 2.0, "maxPosAcc": 2.0, "maxNegAcc": 4.5, "usualPosAcc": 2.0, "usualNegAcc": 4.5, "minGap": 2.5, "maxSpeed": 11.111, "headwayTime": 2}, "route": ["road_3_0_1", "road_3_1_1", "road_3_2_1", "road_3_3_0"], "interval": 1.0, "startTime": 1021, "endTime": 1021},
{"vehicle": {"length": 5.0, "width": 2.0, "maxPosAcc": 2.0, "maxNegAcc": 4.5, "usualPosAcc": 2.0, "usualNegAcc": 4.5, "minGap": 2.5, "maxSpeed": 11.111, "headwayTime": 2}, "route": ["road_4_11_2", "road_3_11_1", "road_3_12_2", "road_2_12_2", "road_1_12_1", "road_1_13_1", "road_1_14_1", "road_1_15_1", "road_1_16_1"], "interval": 1.0, "startTime": 1022, "endTime": 1022},
{"vehicle": {"length": 5.0, "width": 2.0, "maxPosAcc": 2.0, "maxNegAcc": 4.5, "usualPosAcc": 2.0, "usualNegAcc": 4.5, "minGap": 2.5, "maxSpeed": 11.111, "headwayTime": 2}, "route": ["road_4_5_2", "road_3_5_1", "road_3_6_1", "road_3_7_1", "road_3_8_1", "road_3_9_1", "road_3_10_1", "road_3_11_1", "road_3_12_1", "road_3_13_1", "road_3_14_2", "road_2_14_2", "road_1_14_1", "road_1_15_1", "road_1_16_1"], "interval": 1.0, "startTime": 1025, "endTime": 1025},
{"vehicle": {"length": 5.0, "width": 2.0, "maxPosAcc": 2.0, "maxNegAcc": 4.5, "usualPosAcc": 2.0, "usualNegAcc": 4.5, "minGap": 2.5, "maxSpeed": 11.111, "headwayTime": 2}, "route": ["road_0_10_0", "road_1_10_1", "road_1_11_0", "road_2_11_3", "road_2_10_3", "road_2_9_3", "road_2_8_2", "road_1_8_2"], "interval": 1.0, "startTime": 1025, "endTime": 1025},
{"vehicle": {"length": 5.0, "width": 2.0, "maxPosAcc": 2.0, "maxNegAcc": 4.5, "usualPosAcc": 2.0, "usualNegAcc": 4.5, "minGap": 2.5, "maxSpeed": 11.111, "headwayTime": 2}, "route": ["road_4_15_2", "road_3_15_1", "road_3_16_2", "road_2_16_3", "road_2_15_3", "road_2_14_3", "road_2_13_3", "road_2_12_3", "road_2_11_3", "road_2_10_3", "road_2_9_3", "road_2_8_3", "road_2_7_0", "road_3_7_0"], "interval": 1.0, "startTime": 1026, "endTime": 1026},
{"vehicle": {"length": 5.0, "width": 2.0, "maxPosAcc": 2.0, "maxNegAcc": 4.5, "usualPosAcc": 2.0, "usualNegAcc": 4.5, "minGap": 2.5, "maxSpeed": 11.111, "headwayTime": 2}, "route": ["road_4_11_2", "road_3_11_1", "road_3_12_2", "road_2_12_3", "road_2_11_3", "road_2_10_3", "road_2_9_3", "road_2_8_3", "road_2_7_3", "road_2_6_2", "road_1_6_1", "road_1_7_2"], "interval": 1.0, "startTime": 1026, "endTime": 1026},
{"vehicle": {"length": 5.0, "width": 2.0, "maxPosAcc": 2.0, "maxNegAcc": 4.5, "usualPosAcc": 2.0, "usualNegAcc": 4.5, "minGap": 2.5, "maxSpeed": 11.111, "headwayTime": 2}, "route": ["road_1_17_3", "road_1_16_0", "road_2_16_3", "road_2_15_3", "road_2_14_3", "road_2_13_3", "road_2_12_3", "road_2_11_3", "road_2_10_3", "road_2_9_3", "road_2_8_2", "road_1_8_2"], "interval": 1.0, "startTime": 1028, "endTime": 1028},
{"vehicle": {"length": 5.0, "width": 2.0, "maxPosAcc": 2.0, "maxNegAcc": 4.5, "usualPosAcc": 2.0, "usualNegAcc": 4.5, "minGap": 2.5, "maxSpeed": 11.111, "headwayTime": 2}, "route": ["road_0_2_0", "road_1_2_1", "road_1_3_0", "road_2_3_0", "road_3_3_1", "road_3_4_1", "road_3_5_1", "road_3_6_1", "road_3_7_1", "road_3_8_1", "road_3_9_1", "road_3_10_1", "road_3_11_0"], "interval": 1.0, "startTime": 1029, "endTime": 1029},
{"vehicle": {"length": 5.0, "width": 2.0, "maxPosAcc": 2.0, "maxNegAcc": 4.5, "usualPosAcc": 2.0, "usualNegAcc": 4.5, "minGap": 2.5, "maxSpeed": 11.111, "headwayTime": 2}, "route": ["road_0_5_0", "road_1_5_1", "road_1_6_1", "road_1_7_1", "road_1_8_1", "road_1_9_1", "road_1_10_1", "road_1_11_2"], "interval": 1.0, "startTime": 1030, "endTime": 1030},
{"vehicle": {"length": 5.0, "width": 2.0, "maxPosAcc": 2.0, "maxNegAcc": 4.5, "usualPosAcc": 2.0, "usualNegAcc": 4.5, "minGap": 2.5, "maxSpeed": 11.111, "headwayTime": 2}, "route": ["road_4_3_2", "road_3_3_1", "road_3_4_1", "road_3_5_1", "road_3_6_2", "road_2_6_2", "road_1_6_2"], "interval": 1.0, "startTime": 1032, "endTime": 1032},
{"vehicle": {"length": 5.0, "width": 2.0, "maxPosAcc": 2.0, "maxNegAcc": 4.5, "usualPosAcc": 2.0, "usualNegAcc": 4.5, "minGap": 2.5, "maxSpeed": 11.111, "headwayTime": 2}, "route": ["road_0_10_0", "road_1_10_1", "road_1_11_1", "road_1_12_1", "road_1_13_1", "road_1_14_1", "road_1_15_0", "road_2_15_0", "road_3_15_1", "road_3_16_1"], "interval": 1.0, "startTime": 1034, "endTime": 1034},
{"vehicle": {"length": 5.0, "width": 2.0, "maxPosAcc": 2.0, "maxNegAcc": 4.5, "usualPosAcc": 2.0, "usualNegAcc": 4.5, "minGap": 2.5, "maxSpeed": 11.111, "headwayTime": 2}, "route": ["road_4_6_2", "road_3_6_1", "road_3_7_1", "road_3_8_1", "road_3_9_1", "road_3_10_1", "road_3_11_1", "road_3_12_1", "road_3_13_0"], "interval": 1.0, "startTime": 1035, "endTime": 1035},
{"vehicle": {"length": 5.0, "width": 2.0, "maxPosAcc": 2.0, "maxNegAcc": 4.5, "usualPosAcc": 2.0, "usualNegAcc": 4.5, "minGap": 2.5, "maxSpeed": 11.111, "headwayTime": 2}, "route": ["road_4_14_2", "road_3_14_2", "road_2_14_3", "road_2_13_3", "road_2_12_3", "road_2_11_3", "road_2_10_3", "road_2_9_3", "road_2_8_2", "road_1_8_1", "road_1_9_2"], "interval": 1.0, "startTime": 1038, "endTime": 1038},
{"vehicle": {"length": 5.0, "width": 2.0, "maxPosAcc": 2.0, "maxNegAcc": 4.5, "usualPosAcc": 2.0, "usualNegAcc": 4.5, "minGap": 2.5, "maxSpeed": 11.111, "headwayTime": 2}, "route": ["road_0_13_0", "road_1_13_0", "road_2_13_3", "road_2_12_3", "road_2_11_3", "road_2_10_3", "road_2_9_3", "road_2_8_3", "road_2_7_3", "road_2_6_3", "road_2_5_0", "road_3_5_0"], "interval": 1.0, "startTime": 1039, "endTime": 1039},
{"vehicle": {"length": 5.0, "width": 2.0, "maxPosAcc": 2.0, "maxNegAcc": 4.5, "usualPosAcc": 2.0, "usualNegAcc": 4.5, "minGap": 2.5, "maxSpeed": 11.111, "headwayTime": 2}, "route": ["road_3_17_3", "road_3_16_2", "road_2_16_3", "road_2_15_0", "road_3_15_0"], "interval": 1.0, "startTime": 1041, "endTime": 1041},
{"vehicle": {"length": 5.0, "width": 2.0, "maxPosAcc": 2.0, "maxNegAcc": 4.5, "usualPosAcc": 2.0, "usualNegAcc": 4.5, "minGap": 2.5, "maxSpeed": 11.111, "headwayTime": 2}, "route": ["road_0_14_0", "road_1_14_1", "road_1_15_0", "road_2_15_3", "road_2_14_3", "road_2_13_3", "road_2_12_3", "road_2_11_3", "road_2_10_2", "road_1_10_2"], "interval": 1.0, "startTime": 1041, "endTime": 1041},
{"vehicle": {"length": 5.0, "width": 2.0, "maxPosAcc": 2.0, "maxNegAcc": 4.5, "usualPosAcc": 2.0, "usualNegAcc": 4.5, "minGap": 2.5, "maxSpeed": 11.111, "headwayTime": 2}, "route": ["road_4_2_2", "road_3_2_2", "road_2_2_3", "road_2_1_3"], "interval": 1.0, "startTime": 1045, "endTime": 1045},
{"vehicle": {"length": 5.0, "width": 2.0, "maxPosAcc": 2.0, "maxNegAcc": 4.5, "usualPosAcc": 2.0, "usualNegAcc": 4.5, "minGap": 2.5, "maxSpeed": 11.111, "headwayTime": 2}, "route": ["road_4_7_2", "road_3_7_1", "road_3_8_1", "road_3_9_1", "road_3_10_1", "road_3_11_1", "road_3_12_1", "road_3_13_1", "road_3_14_1", "road_3_15_1", "road_3_16_2", "road_2_16_1"], "interval": 1.0, "startTime": 1051, "endTime": 1051},
{"vehicle": {"length": 5.0, "width": 2.0, "maxPosAcc": 2.0, "maxNegAcc": 4.5, "usualPosAcc": 2.0, "usualNegAcc": 4.5, "minGap": 2.5, "maxSpeed": 11.111, "headwayTime": 2}, "route": ["road_4_9_2", "road_3_9_1", "road_3_10_2", "road_2_10_3", "road_2_9_3", "road_2_8_3", "road_2_7_3", "road_2_6_3", "road_2_5_3", "road_2_4_3", "road_2_3_0", "road_3_3_0"], "interval": 1.0, "startTime": 1055, "endTime": 1055},
{"vehicle": {"length": 5.0, "width": 2.0, "maxPosAcc": 2.0, "maxNegAcc": 4.5, "usualPosAcc": 2.0, "usualNegAcc": 4.5, "minGap": 2.5, "maxSpeed": 11.111, "headwayTime": 2}, "route": ["road_3_17_3", "road_3_16_2", "road_2_16_3", "road_2_15_3", "road_2_14_3", "road_2_13_3", "road_2_12_3", "road_2_11_3", "road_2_10_3", "road_2_9_3", "road_2_8_3", "road_2_7_3", "road_2_6_3", "road_2_5_3", "road_2_4_2", "road_1_4_1", "road_1_5_2"], "interval": 1.0, "startTime": 1055, "endTime": 1055},
{"vehicle": {"length": 5.0, "width": 2.0, "maxPosAcc": 2.0, "maxNegAcc": 4.5, "usualPosAcc": 2.0, "usualNegAcc": 4.5, "minGap": 2.5, "maxSpeed": 11.111, "headwayTime": 2}, "route": ["road_0_7_0", "road_1_7_0", "road_2_7_0", "road_3_7_0"], "interval": 1.0, "startTime": 1055, "endTime": 1055},
{"vehicle": {"length": 5.0, "width": 2.0, "maxPosAcc": 2.0, "maxNegAcc": 4.5, "usualPosAcc": 2.0, "usualNegAcc": 4.5, "minGap": 2.5, "maxSpeed": 11.111, "headwayTime": 2}, "route": ["road_4_14_2", "road_3_14_2", "road_2_14_3", "road_2_13_3", "road_2_12_3", "road_2_11_3", "road_2_10_3", "road_2_9_3", "road_2_8_2", "road_1_8_1", "road_1_9_2"], "interval": 1.0, "startTime": 1056, "endTime": 1056},
{"vehicle": {"length": 5.0, "width": 2.0, "maxPosAcc": 2.0, "maxNegAcc": 4.5, "usualPosAcc": 2.0, "usualNegAcc": 4.5, "minGap": 2.5, "maxSpeed": 11.111, "headwayTime": 2}, "route": ["road_0_4_0", "road_1_4_1", "road_1_5_0", "road_2_5_0", "road_3_5_1", "road_3_6_1", "road_3_7_1", "road_3_8_1", "road_3_9_0"], "interval": 1.0, "startTime": 1061, "endTime": 1061},
{"vehicle": {"length": 5.0, "width": 2.0, "maxPosAcc": 2.0, "maxNegAcc": 4.5, "usualPosAcc": 2.0, "usualNegAcc": 4.5, "minGap": 2.5, "maxSpeed": 11.111, "headwayTime": 2}, "route": ["road_4_6_2", "road_3_6_1", "road_3_7_1", "road_3_8_1", "road_3_9_1", "road_3_10_0"], "interval": 1.0, "startTime": 1061, "endTime": 1061},
{"vehicle": {"length": 5.0, "width": 2.0, "maxPosAcc": 2.0, "maxNegAcc": 4.5, "usualPosAcc": 2.0, "usualNegAcc": 4.5, "minGap": 2.5, "maxSpeed": 11.111, "headwayTime": 2}, "route": ["road_4_14_2", "road_3_14_2", "road_2_14_2", "road_1_14_1", "road_1_15_1", "road_1_16_1"], "interval": 1.0, "startTime": 1062, "endTime": 1062},
{"vehicle": {"length": 5.0, "width": 2.0, "maxPosAcc": 2.0, "maxNegAcc": 4.5, "usualPosAcc": 2.0, "usualNegAcc": 4.5, "minGap": 2.5, "maxSpeed": 11.111, "headwayTime": 2}, "route": ["road_4_4_2", "road_3_4_1", "road_3_5_1", "road_3_6_0"], "interval": 1.0, "startTime": 1071, "endTime": 1071},
{"vehicle": {"length": 5.0, "width": 2.0, "maxPosAcc": 2.0, "maxNegAcc": 4.5, "usualPosAcc": 2.0, "usualNegAcc": 4.5, "minGap": 2.5, "maxSpeed": 11.111, "headwayTime": 2}, "route": ["road_2_0_1", "road_2_1_0", "road_3_1_1", "road_3_2_1", "road_3_3_1", "road_3_4_1", "road_3_5_1", "road_3_6_1", "road_3_7_1", "road_3_8_1", "road_3_9_1", "road_3_10_1", "road_3_11_1", "road_3_12_1", "road_3_13_0"], "interval": 1.0, "startTime": 1071, "endTime": 1071},
{"vehicle": {"length": 5.0, "width": 2.0, "maxPosAcc": 2.0, "maxNegAcc": 4.5, "usualPosAcc": 2.0, "usualNegAcc": 4.5, "minGap": 2.5, "maxSpeed": 11.111, "headwayTime": 2}, "route": ["road_0_13_0", "road_1_13_0", "road_2_13_3", "road_2_12_3", "road_2_11_3", "road_2_10_3", "road_2_9_3", "road_2_8_3", "road_2_7_3", "road_2_6_3", "road_2_5_3", "road_2_4_3", "road_2_3_3", "road_2_2_2", "road_1_2_1", "road_1_3_2"], "interval": 1.0, "startTime": 1074, "endTime": 1074},
{"vehicle": {"length": 5.0, "width": 2.0, "maxPosAcc": 2.0, "maxNegAcc": 4.5, "usualPosAcc": 2.0, "usualNegAcc": 4.5, "minGap": 2.5, "maxSpeed": 11.111, "headwayTime": 2}, "route": ["road_4_15_2", "road_3_15_1", "road_3_16_2", "road_2_16_3", "road_2_15_3", "road_2_14_3", "road_2_13_3", "road_2_12_3", "road_2_11_3", "road_2_10_3", "road_2_9_3", "road_2_8_3", "road_2_7_3", "road_2_6_2", "road_1_6_1", "road_1_7_2"], "interval": 1.0, "startTime": 1080, "endTime": 1080},
{"vehicle": {"length": 5.0, "width": 2.0, "maxPosAcc": 2.0, "maxNegAcc": 4.5, "usualPosAcc": 2.0, "usualNegAcc": 4.5, "minGap": 2.5, "maxSpeed": 11.111, "headwayTime": 2}, "route": ["road_0_15_0", "road_1_15_0", "road_2_15_3", "road_2_14_3", "road_2_13_3", "road_2_12_3", "road_2_11_0", "road_3_11_0"], "interval": 1.0, "startTime": 1080, "endTime": 1080},
{"vehicle": {"length": 5.0, "width": 2.0, "maxPosAcc": 2.0, "maxNegAcc": 4.5, "usualPosAcc": 2.0, "usualNegAcc": 4.5, "minGap": 2.5, "maxSpeed": 11.111, "headwayTime": 2}, "route": ["road_4_8_2", "road_3_8_1", "road_3_9_1", "road_3_10_1", "road_3_11_1", "road_3_12_1", "road_3_13_0"], "interval": 1.0, "startTime": 1080, "endTime": 1080},
{"vehicle": {"length": 5.0, "width": 2.0, "maxPosAcc": 2.0, "maxNegAcc": 4.5, "usualPosAcc": 2.0, "usualNegAcc": 4.5, "minGap": 2.5, "maxSpeed": 11.111, "headwayTime": 2}, "route": ["road_4_4_2", "road_3_4_2", "road_2_4_3", "road_2_3_0", "road_3_3_0"], "interval": 1.0, "startTime": 1080, "endTime": 1080},
{"vehicle": {"length": 5.0, "width": 2.0, "maxPosAcc": 2.0, "maxNegAcc": 4.5, "usualPosAcc": 2.0, "usualNegAcc": 4.5, "minGap": 2.5, "maxSpeed": 11.111, "headwayTime": 2}, "route": ["road_3_0_1", "road_3_1_1", "road_3_2_1", "road_3_3_1", "road_3_4_1", "road_3_5_1", "road_3_6_1", "road_3_7_1", "road_3_8_1", "road_3_9_1", "road_3_10_1", "road_3_11_1", "road_3_12_1", "road_3_13_1", "road_3_14_1", "road_3_15_1", "road_3_16_1"], "interval": 1.0, "startTime": 1080, "endTime": 1080},
{"vehicle": {"length": 5.0, "width": 2.0, "maxPosAcc": 2.0, "maxNegAcc": 4.5, "usualPosAcc": 2.0, "usualNegAcc": 4.5, "minGap": 2.5, "maxSpeed": 11.111, "headwayTime": 2}, "route": ["road_4_5_2", "road_3_5_1", "road_3_6_1", "road_3_7_1", "road_3_8_1", "road_3_9_1", "road_3_10_1", "road_3_11_0"], "interval": 1.0, "startTime": 1080, "endTime": 1080},
{"vehicle": {"length": 5.0, "width": 2.0, "maxPosAcc": 2.0, "maxNegAcc": 4.5, "usualPosAcc": 2.0, "usualNegAcc": 4.5, "minGap": 2.5, "maxSpeed": 11.111, "headwayTime": 2}, "route": ["road_4_6_2", "road_3_6_1", "road_3_7_1", "road_3_8_0"], "interval": 1.0, "startTime": 1080, "endTime": 1080},
{"vehicle": {"length": 5.0, "width": 2.0, "maxPosAcc": 2.0, "maxNegAcc": 4.5, "usualPosAcc": 2.0, "usualNegAcc": 4.5, "minGap": 2.5, "maxSpeed": 11.111, "headwayTime": 2}, "route": ["road_4_10_2", "road_3_10_1", "road_3_11_1", "road_3_12_1", "road_3_13_1", "road_3_14_1", "road_3_15_1", "road_3_16_1"], "interval": 1.0, "startTime": 1080, "endTime": 1080},
{"vehicle": {"length": 5.0, "width": 2.0, "maxPosAcc": 2.0, "maxNegAcc": 4.5, "usualPosAcc": 2.0, "usualNegAcc": 4.5, "minGap": 2.5, "maxSpeed": 11.111, "headwayTime": 2}, "route": ["road_4_11_2", "road_3_11_1", "road_3_12_2", "road_2_12_3", "road_2_11_3", "road_2_10_3", "road_2_9_0", "road_3_9_0"], "interval": 1.0, "startTime": 1080, "endTime": 1080},
{"vehicle": {"length": 5.0, "width": 2.0, "maxPosAcc": 2.0, "maxNegAcc": 4.5, "usualPosAcc": 2.0, "usualNegAcc": 4.5, "minGap": 2.5, "maxSpeed": 11.111, "headwayTime": 2}, "route": ["road_4_13_2", "road_3_13_1", "road_3_14_1", "road_3_15_1", "road_3_16_1"], "interval": 1.0, "startTime": 1080, "endTime": 1080},
{"vehicle": {"length": 5.0, "width": 2.0, "maxPosAcc": 2.0, "maxNegAcc": 4.5, "usualPosAcc": 2.0, "usualNegAcc": 4.5, "minGap": 2.5, "maxSpeed": 11.111, "headwayTime": 2}, "route": ["road_4_14_2", "road_3_14_1", "road_3_15_1", "road_3_16_1"], "interval": 1.0, "startTime": 1080, "endTime": 1080},
{"vehicle": {"length": 5.0, "width": 2.0, "maxPosAcc": 2.0, "maxNegAcc": 4.5, "usualPosAcc": 2.0, "usualNegAcc": 4.5, "minGap": 2.5, "maxSpeed": 11.111, "headwayTime": 2}, "route": ["road_3_17_3", "road_3_16_2", "road_2_16_3", "road_2_15_3", "road_2_14_3", "road_2_13_3", "road_2_12_3", "road_2_11_3", "road_2_10_3", "road_2_9_3", "road_2_8_3", "road_2_7_3", "road_2_6_3", "road_2_5_3", "road_2_4_3", "road_2_3_3", "road_2_2_3", "road_2_1_0", "road_3_1_3"], "interval": 1.0, "startTime": 1080, "endTime": 1080},
{"vehicle": {"length": 5.0, "width": 2.0, "maxPosAcc": 2.0, "maxNegAcc": 4.5, "usualPosAcc": 2.0, "usualNegAcc": 4.5, "minGap": 2.5, "maxSpeed": 11.111, "headwayTime": 2}, "route": ["road_2_0_1", "road_2_1_0", "road_3_1_1", "road_3_2_0"], "interval": 1.0, "startTime": 1080, "endTime": 1080},
{"vehicle": {"length": 5.0, "width": 2.0, "maxPosAcc": 2.0, "maxNegAcc": 4.5, "usualPosAcc": 2.0, "usualNegAcc": 4.5, "minGap": 2.5, "maxSpeed": 11.111, "headwayTime": 2}, "route": ["road_1_0_1", "road_1_1_1", "road_1_2_1", "road_1_3_1", "road_1_4_1", "road_1_5_1", "road_1_6_1", "road_1_7_1", "road_1_8_1", "road_1_9_1", "road_1_10_1", "road_1_11_1", "road_1_12_1", "road_1_13_1", "road_1_14_1", "road_1_15_0", "road_2_15_0", "road_3_15_1", "road_3_16_1"], "interval": 1.0, "startTime": 1080, "endTime": 1080},
{"vehicle": {"length": 5.0, "width": 2.0, "maxPosAcc": 2.0, "maxNegAcc": 4.5, "usualPosAcc": 2.0, "usualNegAcc": 4.5, "minGap": 2.5, "maxSpeed": 11.111, "headwayTime": 2}, "route": ["road_0_14_0", "road_1_14_1", "road_1_15_0", "road_2_15_3", "road_2_14_3", "road_2_13_3", "road_2_12_3", "road_2_11_3", "road_2_10_2", "road_1_10_1", "road_1_11_2"], "interval": 1.0, "startTime": 1080, "endTime": 1080},
{"vehicle": {"length": 5.0, "width": 2.0, "maxPosAcc": 2.0, "maxNegAcc": 4.5, "usualPosAcc": 2.0, "usualNegAcc": 4.5, "minGap": 2.5, "maxSpeed": 11.111, "headwayTime": 2}, "route": ["road_2_17_3", "road_2_16_3", "road_2_15_3", "road_2_14_3", "road_2_13_3", "road_2_12_3", "road_2_11_3", "road_2_10_3", "road_2_9_3", "road_2_8_3", "road_2_7_3", "road_2_6_3", "road_2_5_3", "road_2_4_3", "road_2_3_3", "road_2_2_2", "road_1_2_1", "road_1_3_2"], "interval": 1.0, "startTime": 1080, "endTime": 1080},
{"vehicle": {"length": 5.0, "width": 2.0, "maxPosAcc": 2.0, "maxNegAcc": 4.5, "usualPosAcc": 2.0, "usualNegAcc": 4.5, "minGap": 2.5, "maxSpeed": 11.111, "headwayTime": 2}, "route": ["road_0_6_0", "road_1_6_1", "road_1_7_0", "road_2_7_3", "road_2_6_3", "road_2_5_3", "road_2_4_3", "road_2_3_3", "road_2_2_2", "road_1_2_1", "road_1_3_2"], "interval": 1.0, "startTime": 1080, "endTime": 1080},
{"vehicle": {"length": 5.0, "width": 2.0, "maxPosAcc": 2.0, "maxNegAcc": 4.5, "usualPosAcc": 2.0, "usualNegAcc": 4.5, "minGap": 2.5, "maxSpeed": 11.111, "headwayTime": 2}, "route": ["road_1_17_3", "road_1_16_0", "road_2_16_1"], "interval": 1.0, "startTime": 1080, "endTime": 1080},
{"vehicle": {"length": 5.0, "width": 2.0, "maxPosAcc": 2.0, "maxNegAcc": 4.5, "usualPosAcc": 2.0, "usualNegAcc": 4.5, "minGap": 2.5, "maxSpeed": 11.111, "headwayTime": 2}, "route": ["road_0_5_0", "road_1_5_1", "road_1_6_1", "road_1_7_1", "road_1_8_1", "road_1_9_1", "road_1_10_1", "road_1_11_1", "road_1_12_1", "road_1_13_1", "road_1_14_1", "road_1_15_1", "road_1_16_1"], "interval": 1.0, "startTime": 1080, "endTime": 1080},
{"vehicle": {"length": 5.0, "width": 2.0, "maxPosAcc": 2.0, "maxNegAcc": 4.5, "usualPosAcc": 2.0, "usualNegAcc": 4.5, "minGap": 2.5, "maxSpeed": 11.111, "headwayTime": 2}, "route": ["road_3_17_3", "road_3_16_2", "road_2_16_3", "road_2_15_3", "road_2_14_3", "road_2_13_3", "road_2_12_3", "road_2_11_3", "road_2_10_3", "road_2_9_3", "road_2_8_3", "road_2_7_3", "road_2_6_3", "road_2_5_3", "road_2_4_3", "road_2_3_3", "road_2_2_3", "road_2_1_2", "road_1_1_3"], "interval": 1.0, "startTime": 1081, "endTime": 1081},
{"vehicle": {"length": 5.0, "width": 2.0, "maxPosAcc": 2.0, "maxNegAcc": 4.5, "usualPosAcc": 2.0, "usualNegAcc": 4.5, "minGap": 2.5, "maxSpeed": 11.111, "headwayTime": 2}, "route": ["road_4_9_2", "road_3_9_1", "road_3_10_0"], "interval": 1.0, "startTime": 1083, "endTime": 1083},
{"vehicle": {"length": 5.0, "width": 2.0, "maxPosAcc": 2.0, "maxNegAcc": 4.5, "usualPosAcc": 2.0, "usualNegAcc": 4.5, "minGap": 2.5, "maxSpeed": 11.111, "headwayTime": 2}, "route": ["road_3_0_1", "road_3_1_1", "road_3_2_1", "road_3_3_1", "road_3_4_1", "road_3_5_0"], "interval": 1.0, "startTime": 1086, "endTime": 1086},
{"vehicle": {"length": 5.0, "width": 2.0, "maxPosAcc": 2.0, "maxNegAcc": 4.5, "usualPosAcc": 2.0, "usualNegAcc": 4.5, "minGap": 2.5, "maxSpeed": 11.111, "headwayTime": 2}, "route": ["road_4_7_2", "road_3_7_1", "road_3_8_1", "road_3_9_1", "road_3_10_1", "road_3_11_1", "road_3_12_1", "road_3_13_1", "road_3_14_0"], "interval": 1.0, "startTime": 1091, "endTime": 1091},
{"vehicle": {"length": 5.0, "width": 2.0, "maxPosAcc": 2.0, "maxNegAcc": 4.5, "usualPosAcc": 2.0, "usualNegAcc": 4.5, "minGap": 2.5, "maxSpeed": 11.111, "headwayTime": 2}, "route": ["road_2_0_1", "road_2_1_2", "road_1_1_1", "road_1_2_1", "road_1_3_1", "road_1_4_1", "road_1_5_1", "road_1_6_1", "road_1_7_1", "road_1_8_1", "road_1_9_1", "road_1_10_1", "road_1_11_1", "road_1_12_1", "road_1_13_1", "road_1_14_1", "road_1_15_2"], "interval": 1.0, "startTime": 1094, "endTime": 1094},
{"vehicle": {"length": 5.0, "width": 2.0, "maxPosAcc": 2.0, "maxNegAcc": 4.5, "usualPosAcc": 2.0, "usualNegAcc": 4.5, "minGap": 2.5, "maxSpeed": 11.111, "headwayTime": 2}, "route": ["road_3_0_1", "road_3_1_2", "road_2_1_2", "road_1_1_3"], "interval": 1.0, "startTime": 1095, "endTime": 1095},
{"vehicle": {"length": 5.0, "width": 2.0, "maxPosAcc": 2.0, "maxNegAcc": 4.5, "usualPosAcc": 2.0, "usualNegAcc": 4.5, "minGap": 2.5, "maxSpeed": 11.111, "headwayTime": 2}, "route": ["road_4_10_2", "road_3_10_2", "road_2_10_3", "road_2_9_3", "road_2_8_3", "road_2_7_3", "road_2_6_3", "road_2_5_3", "road_2_4_3", "road_2_3_3", "road_2_2_3", "road_2_1_0", "road_3_1_3"], "interval": 1.0, "startTime": 1096, "endTime": 1096},
{"vehicle": {"length": 5.0, "width": 2.0, "maxPosAcc": 2.0, "maxNegAcc": 4.5, "usualPosAcc": 2.0, "usualNegAcc": 4.5, "minGap": 2.5, "maxSpeed": 11.111, "headwayTime": 2}, "route": ["road_0_8_0", "road_1_8_1", "road_1_9_0", "road_2_9_3", "road_2_8_3", "road_2_7_3", "road_2_6_3", "road_2_5_3", "road_2_4_3", "road_2_3_3", "road_2_2_3", "road_2_1_0", "road_3_1_1", "road_3_2_0"], "interval": 1.0, "startTime": 1099, "endTime": 1099},
{"vehicle": {"length": 5.0, "width": 2.0, "maxPosAcc": 2.0, "maxNegAcc": 4.5, "usualPosAcc": 2.0, "usualNegAcc": 4.5, "minGap": 2.5, "maxSpeed": 11.111, "headwayTime": 2}, "route": ["road_0_5_0", "road_1_5_1", "road_1_6_1", "road_1_7_1", "road_1_8_1", "road_1_9_1", "road_1_10_1", "road_1_11_2"], "interval": 1.0, "startTime": 1099, "endTime": 1099},
{"vehicle": {"length": 5.0, "width": 2.0, "maxPosAcc": 2.0, "maxNegAcc": 4.5, "usualPosAcc": 2.0, "usualNegAcc": 4.5, "minGap": 2.5, "maxSpeed": 11.111, "headwayTime": 2}, "route": ["road_1_17_3", "road_1_16_0", "road_2_16_3", "road_2_15_3", "road_2_14_3", "road_2_13_3", "road_2_12_3", "road_2_11_3", "road_2_10_3", "road_2_9_0", "road_3_9_0"], "interval": 1.0, "startTime": 1101, "endTime": 1101},
{"vehicle": {"length": 5.0, "width": 2.0, "maxPosAcc": 2.0, "maxNegAcc": 4.5, "usualPosAcc": 2.0, "usualNegAcc": 4.5, "minGap": 2.5, "maxSpeed": 11.111, "headwayTime": 2}, "route": ["road_4_5_2", "road_3_5_1", "road_3_6_2", "road_2_6_2", "road_1_6_2"], "interval": 1.0, "startTime": 1102, "endTime": 1102},
{"vehicle": {"length": 5.0, "width": 2.0, "maxPosAcc": 2.0, "maxNegAcc": 4.5, "usualPosAcc": 2.0, "usualNegAcc": 4.5, "minGap": 2.5, "maxSpeed": 11.111, "headwayTime": 2}, "route": ["road_2_17_3", "road_2_16_3", "road_2_15_3", "road_2_14_3", "road_2_13_3", "road_2_12_3", "road_2_11_3", "road_2_10_3", "road_2_9_3", "road_2_8_3", "road_2_7_3", "road_2_6_3", "road_2_5_0", "road_3_5_0"], "interval": 1.0, "startTime": 1106, "endTime": 1106},
{"vehicle": {"length": 5.0, "width": 2.0, "maxPosAcc": 2.0, "maxNegAcc": 4.5, "usualPosAcc": 2.0, "usualNegAcc": 4.5, "minGap": 2.5, "maxSpeed": 11.111, "headwayTime": 2}, "route": ["road_4_7_2", "road_3_7_1", "road_3_8_2", "road_2_8_3", "road_2_7_3", "road_2_6_2", "road_1_6_1", "road_1_7_2"], "interval": 1.0, "startTime": 1107, "endTime": 1107},
{"vehicle": {"length": 5.0, "width": 2.0, "maxPosAcc": 2.0, "maxNegAcc": 4.5, "usualPosAcc": 2.0, "usualNegAcc": 4.5, "minGap": 2.5, "maxSpeed": 11.111, "headwayTime": 2}, "route": ["road_4_9_2", "road_3_9_1", "road_3_10_2", "road_2_10_2", "road_1_10_1", "road_1_11_2"], "interval": 1.0, "startTime": 1115, "endTime": 1115},
{"vehicle": {"length": 5.0, "width": 2.0, "maxPosAcc": 2.0, "maxNegAcc": 4.5, "usualPosAcc": 2.0, "usualNegAcc": 4.5, "minGap": 2.5, "maxSpeed": 11.111, "headwayTime": 2}, "route": ["road_1_0_1", "road_1_1_0", "road_2_1_0", "road_3_1_3"], "interval": 1.0, "startTime": 1115, "endTime": 1115},
{"vehicle": {"length": 5.0, "width": 2.0, "maxPosAcc": 2.0, "maxNegAcc": 4.5, "usualPosAcc": 2.0, "usualNegAcc": 4.5, "minGap": 2.5, "maxSpeed": 11.111, "headwayTime": 2}, "route": ["road_0_6_0", "road_1_6_1", "road_1_7_0", "road_2_7_3", "road_2_6_3", "road_2_5_0", "road_3_5_0"], "interval": 1.0, "startTime": 1115, "endTime": 1115},
{"vehicle": {"length": 5.0, "width": 2.0, "maxPosAcc": 2.0, "maxNegAcc": 4.5, "usualPosAcc": 2.0, "usualNegAcc": 4.5, "minGap": 2.5, "maxSpeed": 11.111, "headwayTime": 2}, "route": ["road_0_4_0", "road_1_4_1", "road_1_5_0", "road_2_5_3", "road_2_4_3", "road_2_3_3", "road_2_2_2", "road_1_2_1", "road_1_3_2"], "interval": 1.0, "startTime": 1116, "endTime": 1116},
{"vehicle": {"length": 5.0, "width": 2.0, "maxPosAcc": 2.0, "maxNegAcc": 4.5, "usualPosAcc": 2.0, "usualNegAcc": 4.5, "minGap": 2.5, "maxSpeed": 11.111, "headwayTime": 2}, "route": ["road_4_6_2", "road_3_6_2", "road_2_6_3", "road_2_5_3", "road_2_4_3", "road_2_3_3", "road_2_2_3", "road_2_1_0", "road_3_1_3"], "interval": 1.0, "startTime": 1117, "endTime": 1117},
{"vehicle": {"length": 5.0, "width": 2.0, "maxPosAcc": 2.0, "maxNegAcc": 4.5, "usualPosAcc": 2.0, "usualNegAcc": 4.5, "minGap": 2.5, "maxSpeed": 11.111, "headwayTime": 2}, "route": ["road_1_0_1", "road_1_1_0", "road_2_1_0", "road_3_1_3"], "interval": 1.0, "startTime": 1119, "endTime": 1119},
{"vehicle": {"length": 5.0, "width": 2.0, "maxPosAcc": 2.0, "maxNegAcc": 4.5, "usualPosAcc": 2.0, "usualNegAcc": 4.5, "minGap": 2.5, "maxSpeed": 11.111, "headwayTime": 2}, "route": ["road_4_13_2", "road_3_13_1", "road_3_14_2", "road_2_14_3", "road_2_13_3", "road_2_12_3", "road_2_11_3", "road_2_10_3", "road_2_9_3", "road_2_8_3", "road_2_7_3", "road_2_6_3", "road_2_5_0", "road_3_5_1", "road_3_6_0"], "interval": 1.0, "startTime": 1123, "endTime": 1123},
{"vehicle": {"length": 5.0, "width": 2.0, "maxPosAcc": 2.0, "maxNegAcc": 4.5, "usualPosAcc": 2.0, "usualNegAcc": 4.5, "minGap": 2.5, "maxSpeed": 11.111, "headwayTime": 2}, "route": ["road_0_2_0", "road_1_2_1", "road_1_3_0", "road_2_3_0", "road_3_3_1", "road_3_4_1", "road_3_5_1", "road_3_6_1", "road_3_7_1", "road_3_8_1", "road_3_9_1", "road_3_10_1", "road_3_11_1", "road_3_12_1", "road_3_13_1", "road_3_14_0"], "interval": 1.0, "startTime": 1123, "endTime": 1123},
{"vehicle": {"length": 5.0, "width": 2.0, "maxPosAcc": 2.0, "maxNegAcc": 4.5, "usualPosAcc": 2.0, "usualNegAcc": 4.5, "minGap": 2.5, "maxSpeed": 11.111, "headwayTime": 2}, "route": ["road_3_0_1", "road_3_1_1", "road_3_2_1", "road_3_3_0"], "interval": 1.0, "startTime": 1125, "endTime": 1125},
{"vehicle": {"length": 5.0, "width": 2.0, "maxPosAcc": 2.0, "maxNegAcc": 4.5, "usualPosAcc": 2.0, "usualNegAcc": 4.5, "minGap": 2.5, "maxSpeed": 11.111, "headwayTime": 2}, "route": ["road_0_14_0", "road_1_14_1", "road_1_15_0", "road_2_15_3", "road_2_14_3", "road_2_13_3", "road_2_12_3", "road_2_11_0", "road_3_11_0"], "interval": 1.0, "startTime": 1127, "endTime": 1127},
{"vehicle": {"length": 5.0, "width": 2.0, "maxPosAcc": 2.0, "maxNegAcc": 4.5, "usualPosAcc": 2.0, "usualNegAcc": 4.5, "minGap": 2.5, "maxSpeed": 11.111, "headwayTime": 2}, "route": ["road_1_0_1", "road_1_1_0", "road_2_1_0", "road_3_1_3"], "interval": 1.0, "startTime": 1135, "endTime": 1135},
{"vehicle": {"length": 5.0, "width": 2.0, "maxPosAcc": 2.0, "maxNegAcc": 4.5, "usualPosAcc": 2.0, "usualNegAcc": 4.5, "minGap": 2.5, "maxSpeed": 11.111, "headwayTime": 2}, "route": ["road_3_0_1", "road_3_1_1", "road_3_2_1", "road_3_3_1", "road_3_4_1", "road_3_5_1", "road_3_6_1", "road_3_7_1", "road_3_8_1", "road_3_9_1", "road_3_10_1", "road_3_11_1", "road_3_12_1", "road_3_13_1", "road_3_14_1", "road_3_15_1", "road_3_16_1"], "interval": 1.0, "startTime": 1136, "endTime": 1136},
{"vehicle": {"length": 5.0, "width": 2.0, "maxPosAcc": 2.0, "maxNegAcc": 4.5, "usualPosAcc": 2.0, "usualNegAcc": 4.5, "minGap": 2.5, "maxSpeed": 11.111, "headwayTime": 2}, "route": ["road_2_0_1", "road_2_1_0", "road_3_1_1", "road_3_2_1", "road_3_3_1", "road_3_4_1", "road_3_5_1", "road_3_6_1", "road_3_7_1", "road_3_8_1", "road_3_9_1", "road_3_10_1", "road_3_11_1", "road_3_12_1", "road_3_13_1", "road_3_14_0"], "interval": 1.0, "startTime": 1136, "endTime": 1136},
{"vehicle": {"length": 5.0, "width": 2.0, "maxPosAcc": 2.0, "maxNegAcc": 4.5, "usualPosAcc": 2.0, "usualNegAcc": 4.5, "minGap": 2.5, "maxSpeed": 11.111, "headwayTime": 2}, "route": ["road_4_15_2", "road_3_15_1", "road_3_16_2", "road_2_16_3", "road_2_15_3", "road_2_14_3", "road_2_13_3", "road_2_12_3", "road_2_11_3", "road_2_10_3", "road_2_9_3", "road_2_8_2", "road_1_8_1", "road_1_9_2"], "interval": 1.0, "startTime": 1140, "endTime": 1140},
{"vehicle": {"length": 5.0, "width": 2.0, "maxPosAcc": 2.0, "maxNegAcc": 4.5, "usualPosAcc": 2.0, "usualNegAcc": 4.5, "minGap": 2.5, "maxSpeed": 11.111, "headwayTime": 2}, "route": ["road_0_15_0", "road_1_15_0", "road_2_15_3", "road_2_14_3", "road_2_13_3", "road_2_12_3", "road_2_11_3", "road_2_10_3", "road_2_9_3", "road_2_8_3", "road_2_7_3", "road_2_6_3", "road_2_5_3", "road_2_4_3", "road_2_3_3", "road_2_2_3", "road_2_1_0", "road_3_1_1", "road_3_2_0"], "interval": 1.0, "startTime": 1140, "endTime": 1140},
{"vehicle": {"length": 5.0, "width": 2.0, "maxPosAcc": 2.0, "maxNegAcc": 4.5, "usualPosAcc": 2.0, "usualNegAcc": 4.5, "minGap": 2.5, "maxSpeed": 11.111, "headwayTime": 2}, "route": ["road_4_8_2", "road_3_8_1", "road_3_9_1", "road_3_10_1", "road_3_11_1", "road_3_12_1", "road_3_13_1", "road_3_14_1", "road_3_15_1", "road_3_16_2", "road_2_16_1"], "interval": 1.0, "startTime": 1140, "endTime": 1140},
{"vehicle": {"length": 5.0, "width": 2.0, "maxPosAcc": 2.0, "maxNegAcc": 4.5, "usualPosAcc": 2.0, "usualNegAcc": 4.5, "minGap": 2.5, "maxSpeed": 11.111, "headwayTime": 2}, "route": ["road_0_8_0", "road_1_8_1", "road_1_9_0", "road_2_9_3", "road_2_8_3", "road_2_7_3", "road_2_6_3", "road_2_5_3", "road_2_4_2", "road_1_4_1", "road_1_5_2"], "interval": 1.0, "startTime": 1140, "endTime": 1140},
{"vehicle": {"length": 5.0, "width": 2.0, "maxPosAcc": 2.0, "maxNegAcc": 4.5, "usualPosAcc": 2.0, "usualNegAcc": 4.5, "minGap": 2.5, "maxSpeed": 11.111, "headwayTime": 2}, "route": ["road_4_4_2", "road_3_4_1", "road_3_5_1", "road_3_6_1", "road_3_7_1", "road_3_8_1", "road_3_9_1", "road_3_10_1", "road_3_11_0"], "interval": 1.0, "startTime": 1140, "endTime": 1140},
{"vehicle": {"length": 5.0, "width": 2.0, "maxPosAcc": 2.0, "maxNegAcc": 4.5, "usualPosAcc": 2.0, "usualNegAcc": 4.5, "minGap": 2.5, "maxSpeed": 11.111, "headwayTime": 2}, "route": ["road_3_0_1", "road_3_1_1", "road_3_2_1", "road_3_3_1", "road_3_4_1", "road_3_5_1", "road_3_6_1", "road_3_7_1", "road_3_8_0"], "interval": 1.0, "startTime": 1140, "endTime": 1140},
{"vehicle": {"length": 5.0, "width": 2.0, "maxPosAcc": 2.0, "maxNegAcc": 4.5, "usualPosAcc": 2.0, "usualNegAcc": 4.5, "minGap": 2.5, "maxSpeed": 11.111, "headwayTime": 2}, "route": ["road_4_5_2", "road_3_5_1", "road_3_6_1", "road_3_7_1", "road_3_8_1", "road_3_9_1", "road_3_10_0"], "interval": 1.0, "startTime": 1140, "endTime": 1140},
{"vehicle": {"length": 5.0, "width": 2.0, "maxPosAcc": 2.0, "maxNegAcc": 4.5, "usualPosAcc": 2.0, "usualNegAcc": 4.5, "minGap": 2.5, "maxSpeed": 11.111, "headwayTime": 2}, "route": ["road_4_6_2", "road_3_6_1", "road_3_7_1", "road_3_8_1", "road_3_9_0"], "interval": 1.0, "startTime": 1140, "endTime": 1140},
{"vehicle": {"length": 5.0, "width": 2.0, "maxPosAcc": 2.0, "maxNegAcc": 4.5, "usualPosAcc": 2.0, "usualNegAcc": 4.5, "minGap": 2.5, "maxSpeed": 11.111, "headwayTime": 2}, "route": ["road_4_10_2", "road_3_10_2", "road_2_10_3", "road_2_9_3", "road_2_8_3", "road_2_7_3", "road_2_6_3", "road_2_5_3", "road_2_4_3", "road_2_3_0", "road_3_3_1", "road_3_4_0"], "interval": 1.0, "startTime": 1140, "endTime": 1140},
{"vehicle": {"length": 5.0, "width": 2.0, "maxPosAcc": 2.0, "maxNegAcc": 4.5, "usualPosAcc": 2.0, "usualNegAcc": 4.5, "minGap": 2.5, "maxSpeed": 11.111, "headwayTime": 2}, "route": ["road_4_11_2", "road_3_11_1", "road_3_12_1", "road_3_13_1", "road_3_14_1", "road_3_15_1", "road_3_16_2", "road_2_16_1"], "interval": 1.0, "startTime": 1140, "endTime": 1140},
{"vehicle": {"length": 5.0, "width": 2.0, "maxPosAcc": 2.0, "maxNegAcc": 4.5, "usualPosAcc": 2.0, "usualNegAcc": 4.5, "minGap": 2.5, "maxSpeed": 11.111, "headwayTime": 2}, "route": ["road_4_12_2", "road_3_12_1", "road_3_13_1", "road_3_14_1", "road_3_15_1", "road_3_16_1"], "interval": 1.0, "startTime": 1140, "endTime": 1140},
{"vehicle": {"length": 5.0, "width": 2.0, "maxPosAcc": 2.0, "maxNegAcc": 4.5, "usualPosAcc": 2.0, "usualNegAcc": 4.5, "minGap": 2.5, "maxSpeed": 11.111, "headwayTime": 2}, "route": ["road_4_13_2", "road_3_13_1", "road_3_14_2", "road_2_14_3", "road_2_13_3", "road_2_12_3", "road_2_11_3", "road_2_10_3", "road_2_9_3", "road_2_8_3", "road_2_7_3", "road_2_6_3", "road_2_5_0", "road_3_5_1", "road_3_6_0"], "interval": 1.0, "startTime": 1140, "endTime": 1140},
{"vehicle": {"length": 5.0, "width": 2.0, "maxPosAcc": 2.0, "maxNegAcc": 4.5, "usualPosAcc": 2.0, "usualNegAcc": 4.5, "minGap": 2.5, "maxSpeed": 11.111, "headwayTime": 2}, "route": ["road_3_17_3", "road_3_16_2", "road_2_16_3", "road_2_15_3", "road_2_14_3", "road_2_13_3", "road_2_12_3", "road_2_11_3", "road_2_10_3", "road_2_9_3", "road_2_8_3", "road_2_7_3", "road_2_6_3", "road_2_5_0", "road_3_5_0"], "interval": 1.0, "startTime": 1140, "endTime": 1140},
{"vehicle": {"length": 5.0, "width": 2.0, "maxPosAcc": 2.0, "maxNegAcc": 4.5, "usualPosAcc": 2.0, "usualNegAcc": 4.5, "minGap": 2.5, "maxSpeed": 11.111, "headwayTime": 2}, "route": ["road_2_0_1", "road_2_1_0", "road_3_1_1", "road_3_2_1", "road_3_3_1", "road_3_4_1", "road_3_5_1", "road_3_6_1", "road_3_7_1", "road_3_8_1", "road_3_9_1", "road_3_10_1", "road_3_11_1", "road_3_12_1", "road_3_13_0"], "interval": 1.0, "startTime": 1140, "endTime": 1140},
{"vehicle": {"length": 5.0, "width": 2.0, "maxPosAcc": 2.0, "maxNegAcc": 4.5, "usualPosAcc": 2.0, "usualNegAcc": 4.5, "minGap": 2.5, "maxSpeed": 11.111, "headwayTime": 2}, "route": ["road_1_0_1", "road_1_1_0", "road_2_1_0", "road_3_1_3"], "interval": 1.0, "startTime": 1140, "endTime": 1140},
{"vehicle": {"length": 5.0, "width": 2.0, "maxPosAcc": 2.0, "maxNegAcc": 4.5, "usualPosAcc": 2.0, "usualNegAcc": 4.5, "minGap": 2.5, "maxSpeed": 11.111, "headwayTime": 2}, "route": ["road_0_7_0", "road_1_7_0", "road_2_7_3", "road_2_6_3", "road_2_5_3", "road_2_4_2", "road_1_4_2"], "interval": 1.0, "startTime": 1140, "endTime": 1140},
{"vehicle": {"length": 5.0, "width": 2.0, "maxPosAcc": 2.0, "maxNegAcc": 4.5, "usualPosAcc": 2.0, "usualNegAcc": 4.5, "minGap": 2.5, "maxSpeed": 11.111, "headwayTime": 2}, "route": ["road_2_17_3", "road_2_16_0", "road_3_16_1"], "interval": 1.0, "startTime": 1140, "endTime": 1140},
{"vehicle": {"length": 5.0, "width": 2.0, "maxPosAcc": 2.0, "maxNegAcc": 4.5, "usualPosAcc": 2.0, "usualNegAcc": 4.5, "minGap": 2.5, "maxSpeed": 11.111, "headwayTime": 2}, "route": ["road_0_2_0", "road_1_2_1", "road_1_3_1", "road_1_4_1", "road_1_5_1", "road_1_6_1", "road_1_7_1", "road_1_8_1", "road_1_9_1", "road_1_10_1", "road_1_11_1", "road_1_12_1", "road_1_13_1", "road_1_14_1", "road_1_15_1", "road_1_16_0", "road_2_16_1"], "interval": 1.0, "startTime": 1140, "endTime": 1140},
{"vehicle": {"length": 5.0, "width": 2.0, "maxPosAcc": 2.0, "maxNegAcc": 4.5, "usualPosAcc": 2.0, "usualNegAcc": 4.5, "minGap": 2.5, "maxSpeed": 11.111, "headwayTime": 2}, "route": ["road_1_17_3", "road_1_16_0", "road_2_16_3", "road_2_15_0", "road_3_15_0"], "interval": 1.0, "startTime": 1140, "endTime": 1140},
{"vehicle": {"length": 5.0, "width": 2.0, "maxPosAcc": 2.0, "maxNegAcc": 4.5, "usualPosAcc": 2.0, "usualNegAcc": 4.5, "minGap": 2.5, "maxSpeed": 11.111, "headwayTime": 2}, "route": ["road_0_5_0", "road_1_5_1", "road_1_6_2"], "interval": 1.0, "startTime": 1140, "endTime": 1140},
{"vehicle": {"length": 5.0, "width": 2.0, "maxPosAcc": 2.0, "maxNegAcc": 4.5, "usualPosAcc": 2.0, "usualNegAcc": 4.5, "minGap": 2.5, "maxSpeed": 11.111, "headwayTime": 2}, "route": ["road_3_0_1", "road_3_1_1", "road_3_2_1", "road_3_3_1", "road_3_4_1", "road_3_5_0"], "interval": 1.0, "startTime": 1142, "endTime": 1142},
{"vehicle": {"length": 5.0, "width": 2.0, "maxPosAcc": 2.0, "maxNegAcc": 4.5, "usualPosAcc": 2.0, "usualNegAcc": 4.5, "minGap": 2.5, "maxSpeed": 11.111, "headwayTime": 2}, "route": ["road_0_6_0", "road_1_6_1", "road_1_7_1", "road_1_8_1", "road_1_9_1", "road_1_10_1", "road_1_11_1", "road_1_12_1", "road_1_13_2"], "interval": 1.0, "startTime": 1143, "endTime": 1143},
{"vehicle": {"length": 5.0, "width": 2.0, "maxPosAcc": 2.0, "maxNegAcc": 4.5, "usualPosAcc": 2.0, "usualNegAcc": 4.5, "minGap": 2.5, "maxSpeed": 11.111, "headwayTime": 2}, "route": ["road_3_17_3", "road_3_16_2", "road_2_16_3", "road_2_15_3", "road_2_14_3", "road_2_13_3", "road_2_12_3", "road_2_11_3", "road_2_10_3", "road_2_9_3", "road_2_8_3", "road_2_7_0", "road_3_7_0"], "interval": 1.0, "startTime": 1144, "endTime": 1144},
{"vehicle": {"length": 5.0, "width": 2.0, "maxPosAcc": 2.0, "maxNegAcc": 4.5, "usualPosAcc": 2.0, "usualNegAcc": 4.5, "minGap": 2.5, "maxSpeed": 11.111, "headwayTime": 2}, "route": ["road_4_13_2", "road_3_13_1", "road_3_14_2", "road_2_14_3", "road_2_13_3", "road_2_12_3", "road_2_11_3", "road_2_10_3", "road_2_9_3", "road_2_8_3", "road_2_7_3", "road_2_6_3", "road_2_5_0", "road_3_5_1", "road_3_6_0"], "interval": 1.0, "startTime": 1146, "endTime": 1146},
{"vehicle": {"length": 5.0, "width": 2.0, "maxPosAcc": 2.0, "maxNegAcc": 4.5, "usualPosAcc": 2.0, "usualNegAcc": 4.5, "minGap": 2.5, "maxSpeed": 11.111, "headwayTime": 2}, "route": ["road_4_2_2", "road_3_2_1", "road_3_3_1", "road_3_4_1", "road_3_5_1", "road_3_6_1", "road_3_7_1", "road_3_8_1", "road_3_9_1", "road_3_10_1", "road_3_11_1", "road_3_12_1", "road_3_13_0"], "interval": 1.0, "startTime": 1146, "endTime": 1146},
{"vehicle": {"length": 5.0, "width": 2.0, "maxPosAcc": 2.0, "maxNegAcc": 4.5, "usualPosAcc": 2.0, "usualNegAcc": 4.5, "minGap": 2.5, "maxSpeed": 11.111, "headwayTime": 2}, "route": ["road_3_0_1", "road_3_1_2", "road_2_1_2", "road_1_1_3"], "interval": 1.0, "startTime": 1148, "endTime": 1148},
{"vehicle": {"length": 5.0, "width": 2.0, "maxPosAcc": 2.0, "maxNegAcc": 4.5, "usualPosAcc": 2.0, "usualNegAcc": 4.5, "minGap": 2.5, "maxSpeed": 11.111, "headwayTime": 2}, "route": ["road_4_4_2", "road_3_4_2", "road_2_4_3", "road_2_3_3", "road_2_2_3", "road_2_1_0", "road_3_1_3"], "interval": 1.0, "startTime": 1149, "endTime": 1149},
{"vehicle": {"length": 5.0, "width": 2.0, "maxPosAcc": 2.0, "maxNegAcc": 4.5, "usualPosAcc": 2.0, "usualNegAcc": 4.5, "minGap": 2.5, "maxSpeed": 11.111, "headwayTime": 2}, "route": ["road_4_12_2", "road_3_12_2", "road_2_12_3", "road_2_11_3", "road_2_10_3", "road_2_9_3", "road_2_8_3", "road_2_7_3", "road_2_6_3", "road_2_5_3", "road_2_4_2", "road_1_4_1", "road_1_5_2"], "interval": 1.0, "startTime": 1155, "endTime": 1155},
{"vehicle": {"length": 5.0, "width": 2.0, "maxPosAcc": 2.0, "maxNegAcc": 4.5, "usualPosAcc": 2.0, "usualNegAcc": 4.5, "minGap": 2.5, "maxSpeed": 11.111, "headwayTime": 2}, "route": ["road_2_17_3", "road_2_16_3", "road_2_15_3", "road_2_14_3", "road_2_13_3", "road_2_12_3", "road_2_11_3", "road_2_10_3", "road_2_9_3", "road_2_8_3", "road_2_7_3", "road_2_6_3", "road_2_5_3", "road_2_4_3", "road_2_3_3", "road_2_2_3", "road_2_1_3"], "interval": 1.0, "startTime": 1155, "endTime": 1155},
{"vehicle": {"length": 5.0, "width": 2.0, "maxPosAcc": 2.0, "maxNegAcc": 4.5, "usualPosAcc": 2.0, "usualNegAcc": 4.5, "minGap": 2.5, "maxSpeed": 11.111, "headwayTime": 2}, "route": ["road_4_5_2", "road_3_5_1", "road_3_6_2", "road_2_6_3", "road_2_5_3", "road_2_4_3", "road_2_3_3", "road_2_2_3", "road_2_1_2", "road_1_1_3"], "interval": 1.0, "startTime": 1160, "endTime": 1160},
{"vehicle": {"length": 5.0, "width": 2.0, "maxPosAcc": 2.0, "maxNegAcc": 4.5, "usualPosAcc": 2.0, "usualNegAcc": 4.5, "minGap": 2.5, "maxSpeed": 11.111, "headwayTime": 2}, "route": ["road_1_17_3", "road_1_16_0", "road_2_16_1"], "interval": 1.0, "startTime": 1161, "endTime": 1161},
{"vehicle": {"length": 5.0, "width": 2.0, "maxPosAcc": 2.0, "maxNegAcc": 4.5, "usualPosAcc": 2.0, "usualNegAcc": 4.5, "minGap": 2.5, "maxSpeed": 11.111, "headwayTime": 2}, "route": ["road_4_4_2", "road_3_4_1", "road_3_5_1", "road_3_6_1", "road_3_7_1", "road_3_8_1", "road_3_9_1", "road_3_10_1", "road_3_11_1", "road_3_12_0"], "interval": 1.0, "startTime": 1162, "endTime": 1162},
{"vehicle": {"length": 5.0, "width": 2.0, "maxPosAcc": 2.0, "maxNegAcc": 4.5, "usualPosAcc": 2.0, "usualNegAcc": 4.5, "minGap": 2.5, "maxSpeed": 11.111, "headwayTime": 2}, "route": ["road_3_17_3", "road_3_16_2", "road_2_16_3", "road_2_15_3", "road_2_14_3", "road_2_13_3", "road_2_12_3", "road_2_11_3", "road_2_10_3", "road_2_9_0", "road_3_9_1", "road_3_10_0"], "interval": 1.0, "startTime": 1168, "endTime": 1168},
{"vehicle": {"length": 5.0, "width": 2.0, "maxPosAcc": 2.0, "maxNegAcc": 4.5, "usualPosAcc": 2.0, "usualNegAcc": 4.5, "minGap": 2.5, "maxSpeed": 11.111, "headwayTime": 2}, "route": ["road_0_2_0", "road_1_2_1", "road_1_3_1", "road_1_4_1", "road_1_5_1", "road_1_6_1", "road_1_7_1", "road_1_8_1", "road_1_9_1", "road_1_10_1", "road_1_11_1", "road_1_12_1", "road_1_13_1", "road_1_14_2"], "interval": 1.0, "startTime": 1171, "endTime": 1171},
{"vehicle": {"length": 5.0, "width": 2.0, "maxPosAcc": 2.0, "maxNegAcc": 4.5, "usualPosAcc": 2.0, "usualNegAcc": 4.5, "minGap": 2.5, "maxSpeed": 11.111, "headwayTime": 2}, "route": ["road_4_8_2", "road_3_8_2", "road_2_8_3", "road_2_7_3", "road_2_6_3", "road_2_5_3", "road_2_4_3", "road_2_3_0", "road_3_3_1", "road_3_4_0"], "interval": 1.0, "startTime": 1173, "endTime": 1173},
{"vehicle": {"length": 5.0, "width": 2.0, "maxPosAcc": 2.0, "maxNegAcc": 4.5, "usualPosAcc": 2.0, "usualNegAcc": 4.5, "minGap": 2.5, "maxSpeed": 11.111, "headwayTime": 2}, "route": ["road_4_8_2", "road_3_8_1", "road_3_9_1", "road_3_10_1", "road_3_11_1", "road_3_12_1", "road_3_13_1", "road_3_14_1", "road_3_15_1", "road_3_16_2", "road_2_16_1"], "interval": 1.0, "startTime": 1179, "endTime": 1179},
{"vehicle": {"length": 5.0, "width": 2.0, "maxPosAcc": 2.0, "maxNegAcc": 4.5, "usualPosAcc": 2.0, "usualNegAcc": 4.5, "minGap": 2.5, "maxSpeed": 11.111, "headwayTime": 2}, "route": ["road_0_15_0", "road_1_15_1", "road_1_16_0", "road_2_16_1"], "interval": 1.0, "startTime": 1180, "endTime": 1180},
{"vehicle": {"length": 5.0, "width": 2.0, "maxPosAcc": 2.0, "maxNegAcc": 4.5, "usualPosAcc": 2.0, "usualNegAcc": 4.5, "minGap": 2.5, "maxSpeed": 11.111, "headwayTime": 2}, "route": ["road_4_4_2", "road_3_4_1", "road_3_5_1", "road_3_6_1", "road_3_7_1", "road_3_8_1", "road_3_9_1", "road_3_10_1", "road_3_11_1", "road_3_12_1", "road_3_13_1", "road_3_14_1", "road_3_15_1", "road_3_16_1"], "interval": 1.0, "startTime": 1183, "endTime": 1183},
{"vehicle": {"length": 5.0, "width": 2.0, "maxPosAcc": 2.0, "maxNegAcc": 4.5, "usualPosAcc": 2.0, "usualNegAcc": 4.5, "minGap": 2.5, "maxSpeed": 11.111, "headwayTime": 2}, "route": ["road_4_5_2", "road_3_5_1", "road_3_6_1", "road_3_7_1", "road_3_8_1", "road_3_9_1", "road_3_10_1", "road_3_11_1", "road_3_12_1", "road_3_13_1", "road_3_14_1", "road_3_15_1", "road_3_16_2", "road_2_16_1"], "interval": 1.0, "startTime": 1184, "endTime": 1184},
{"vehicle": {"length": 5.0, "width": 2.0, "maxPosAcc": 2.0, "maxNegAcc": 4.5, "usualPosAcc": 2.0, "usualNegAcc": 4.5, "minGap": 2.5, "maxSpeed": 11.111, "headwayTime": 2}, "route": ["road_4_7_2", "road_3_7_1", "road_3_8_2", "road_2_8_3", "road_2_7_3", "road_2_6_3", "road_2_5_3", "road_2_4_3", "road_2_3_0", "road_3_3_0"], "interval": 1.0, "startTime": 1184, "endTime": 1184},
{"vehicle": {"length": 5.0, "width": 2.0, "maxPosAcc": 2.0, "maxNegAcc": 4.5, "usualPosAcc": 2.0, "usualNegAcc": 4.5, "minGap": 2.5, "maxSpeed": 11.111, "headwayTime": 2}, "route": ["road_4_13_2", "road_3_13_1", "road_3_14_2", "road_2_14_3", "road_2_13_3", "road_2_12_3", "road_2_11_3", "road_2_10_3", "road_2_9_3", "road_2_8_3", "road_2_7_3", "road_2_6_3", "road_2_5_3", "road_2_4_3", "road_2_3_3", "road_2_2_3", "road_2_1_0", "road_3_1_3"], "interval": 1.0, "startTime": 1187, "endTime": 1187},
{"vehicle": {"length": 5.0, "width": 2.0, "maxPosAcc": 2.0, "maxNegAcc": 4.5, "usualPosAcc": 2.0, "usualNegAcc": 4.5, "minGap": 2.5, "maxSpeed": 11.111, "headwayTime": 2}, "route": ["road_0_6_0", "road_1_6_1", "road_1_7_1", "road_1_8_1", "road_1_9_1", "road_1_10_1", "road_1_11_1", "road_1_12_1", "road_1_13_1", "road_1_14_2"], "interval": 1.0, "startTime": 1187, "endTime": 1187},
{"vehicle": {"length": 5.0, "width": 2.0, "maxPosAcc": 2.0, "maxNegAcc": 4.5, "usualPosAcc": 2.0, "usualNegAcc": 4.5, "minGap": 2.5, "maxSpeed": 11.111, "headwayTime": 2}, "route": ["road_3_0_1", "road_3_1_1", "road_3_2_1", "road_3_3_0"], "interval": 1.0, "startTime": 1194, "endTime": 1194},
{"vehicle": {"length": 5.0, "width": 2.0, "maxPosAcc": 2.0, "maxNegAcc": 4.5, "usualPosAcc": 2.0, "usualNegAcc": 4.5, "minGap": 2.5, "maxSpeed": 11.111, "headwayTime": 2}, "route": ["road_4_9_2", "road_3_9_1", "road_3_10_2", "road_2_10_2", "road_1_10_2"], "interval": 1.0, "startTime": 1194, "endTime": 1194},
{"vehicle": {"length": 5.0, "width": 2.0, "maxPosAcc": 2.0, "maxNegAcc": 4.5, "usualPosAcc": 2.0, "usualNegAcc": 4.5, "minGap": 2.5, "maxSpeed": 11.111, "headwayTime": 2}, "route": ["road_4_7_2", "road_3_7_1", "road_3_8_1", "road_3_9_1", "road_3_10_1", "road_3_11_1", "road_3_12_1", "road_3_13_1", "road_3_14_1", "road_3_15_1", "road_3_16_1"], "interval": 1.0, "startTime": 1198, "endTime": 1198},
{"vehicle": {"length": 5.0, "width": 2.0, "maxPosAcc": 2.0, "maxNegAcc": 4.5, "usualPosAcc": 2.0, "usualNegAcc": 4.5, "minGap": 2.5, "maxSpeed": 11.111, "headwayTime": 2}, "route": ["road_4_15_2", "road_3_15_1", "road_3_16_2", "road_2_16_3", "road_2_15_3", "road_2_14_3", "road_2_13_3", "road_2_12_3", "road_2_11_3", "road_2_10_3", "road_2_9_3", "road_2_8_3", "road_2_7_3", "road_2_6_3", "road_2_5_3", "road_2_4_3", "road_2_3_3", "road_2_2_3", "road_2_1_0", "road_3_1_3"], "interval": 1.0, "startTime": 1200, "endTime": 1200},
{"vehicle": {"length": 5.0, "width": 2.0, "maxPosAcc": 2.0, "maxNegAcc": 4.5, "usualPosAcc": 2.0, "usualNegAcc": 4.5, "minGap": 2.5, "maxSpeed": 11.111, "headwayTime": 2}, "route": ["road_0_15_0", "road_1_15_0", "road_2_15_3", "road_2_14_3", "road_2_13_3", "road_2_12_3", "road_2_11_3", "road_2_10_3", "road_2_9_0", "road_3_9_0"], "interval": 1.0, "startTime": 1200, "endTime": 1200},
{"vehicle": {"length": 5.0, "width": 2.0, "maxPosAcc": 2.0, "maxNegAcc": 4.5, "usualPosAcc": 2.0, "usualNegAcc": 4.5, "minGap": 2.5, "maxSpeed": 11.111, "headwayTime": 2}, "route": ["road_4_8_2", "road_3_8_2", "road_2_8_3", "road_2_7_3", "road_2_6_3", "road_2_5_3", "road_2_4_3", "road_2_3_3", "road_2_2_3", "road_2_1_0", "road_3_1_1", "road_3_2_0"], "interval": 1.0, "startTime": 1200, "endTime": 1200},
{"vehicle": {"length": 5.0, "width": 2.0, "maxPosAcc": 2.0, "maxNegAcc": 4.5, "usualPosAcc": 2.0, "usualNegAcc": 4.5, "minGap": 2.5, "maxSpeed": 11.111, "headwayTime": 2}, "route": ["road_4_4_2", "road_3_4_1", "road_3_5_1", "road_3_6_1", "road_3_7_1", "road_3_8_1", "road_3_9_1", "road_3_10_1", "road_3_11_1", "road_3_12_1", "road_3_13_1", "road_3_14_1", "road_3_15_0"], "interval": 1.0, "startTime": 1200, "endTime": 1200},
{"vehicle": {"length": 5.0, "width": 2.0, "maxPosAcc": 2.0, "maxNegAcc": 4.5, "usualPosAcc": 2.0, "usualNegAcc": 4.5, "minGap": 2.5, "maxSpeed": 11.111, "headwayTime": 2}, "route": ["road_3_0_1", "road_3_1_1", "road_3_2_1", "road_3_3_0"], "interval": 1.0, "startTime": 1200, "endTime": 1200},
{"vehicle": {"length": 5.0, "width": 2.0, "maxPosAcc": 2.0, "maxNegAcc": 4.5, "usualPosAcc": 2.0, "usualNegAcc": 4.5, "minGap": 2.5, "maxSpeed": 11.111, "headwayTime": 2}, "route": ["road_4_5_2", "road_3_5_1", "road_3_6_2", "road_2_6_3", "road_2_5_3", "road_2_4_2", "road_1_4_1", "road_1_5_2"], "interval": 1.0, "startTime": 1200, "endTime": 1200},
{"vehicle": {"length": 5.0, "width": 2.0, "maxPosAcc": 2.0, "maxNegAcc": 4.5, "usualPosAcc": 2.0, "usualNegAcc": 4.5, "minGap": 2.5, "maxSpeed": 11.111, "headwayTime": 2}, "route": ["road_4_6_2", "road_3_6_1", "road_3_7_1", "road_3_8_1", "road_3_9_0"], "interval": 1.0, "startTime": 1200, "endTime": 1200},
{"vehicle": {"length": 5.0, "width": 2.0, "maxPosAcc": 2.0, "maxNegAcc": 4.5, "usualPosAcc": 2.0, "usualNegAcc": 4.5, "minGap": 2.5, "maxSpeed": 11.111, "headwayTime": 2}, "route": ["road_4_7_2", "road_3_7_1", "road_3_8_0"], "interval": 1.0, "startTime": 1200, "endTime": 1200},
{"vehicle": {"length": 5.0, "width": 2.0, "maxPosAcc": 2.0, "maxNegAcc": 4.5, "usualPosAcc": 2.0, "usualNegAcc": 4.5, "minGap": 2.5, "maxSpeed": 11.111, "headwayTime": 2}, "route": ["road_4_9_2", "road_3_9_1", "road_3_10_0"], "interval": 1.0, "startTime": 1200, "endTime": 1200},
{"vehicle": {"length": 5.0, "width": 2.0, "maxPosAcc": 2.0, "maxNegAcc": 4.5, "usualPosAcc": 2.0, "usualNegAcc": 4.5, "minGap": 2.5, "maxSpeed": 11.111, "headwayTime": 2}, "route": ["road_4_11_2", "road_3_11_1", "road_3_12_2", "road_2_12_3", "road_2_11_3", "road_2_10_3", "road_2_9_0", "road_3_9_0"], "interval": 1.0, "startTime": 1200, "endTime": 1200},
{"vehicle": {"length": 5.0, "width": 2.0, "maxPosAcc": 2.0, "maxNegAcc": 4.5, "usualPosAcc": 2.0, "usualNegAcc": 4.5, "minGap": 2.5, "maxSpeed": 11.111, "headwayTime": 2}, "route": ["road_4_12_2", "road_3_12_2", "road_2_12_3", "road_2_11_3", "road_2_10_2", "road_1_10_2"], "interval": 1.0, "startTime": 1200, "endTime": 1200},
{"vehicle": {"length": 5.0, "width": 2.0, "maxPosAcc": 2.0, "maxNegAcc": 4.5, "usualPosAcc": 2.0, "usualNegAcc": 4.5, "minGap": 2.5, "maxSpeed": 11.111, "headwayTime": 2}, "route": ["road_3_17_3", "road_3_16_2", "road_2_16_3", "road_2_15_3", "road_2_14_3", "road_2_13_3", "road_2_12_3", "road_2_11_0", "road_3_11_0"], "interval": 1.0, "startTime": 1200, "endTime": 1200},
{"vehicle": {"length": 5.0, "width": 2.0, "maxPosAcc": 2.0, "maxNegAcc": 4.5, "usualPosAcc": 2.0, "usualNegAcc": 4.5, "minGap": 2.5, "maxSpeed": 11.111, "headwayTime": 2}, "route": ["road_2_0_1", "road_2_1_0", "road_3_1_1", "road_3_2_1", "road_3_3_0"], "interval": 1.0, "startTime": 1200, "endTime": 1200},
{"vehicle": {"length": 5.0, "width": 2.0, "maxPosAcc": 2.0, "maxNegAcc": 4.5, "usualPosAcc": 2.0, "usualNegAcc": 4.5, "minGap": 2.5, "maxSpeed": 11.111, "headwayTime": 2}, "route": ["road_1_0_1", "road_1_1_1", "road_1_2_1", "road_1_3_0", "road_2_3_0", "road_3_3_1", "road_3_4_1", "road_3_5_0"], "interval": 1.0, "startTime": 1200, "endTime": 1200},
{"vehicle": {"length": 5.0, "width": 2.0, "maxPosAcc": 2.0, "maxNegAcc": 4.5, "usualPosAcc": 2.0, "usualNegAcc": 4.5, "minGap": 2.5, "maxSpeed": 11.111, "headwayTime": 2}, "route": ["road_0_7_0", "road_1_7_0", "road_2_7_0", "road_3_7_1", "road_3_8_1", "road_3_9_1", "road_3_10_1", "road_3_11_1", "road_3_12_1", "road_3_13_1", "road_3_14_0"], "interval": 1.0, "startTime": 1200, "endTime": 1200},
{"vehicle": {"length": 5.0, "width": 2.0, "maxPosAcc": 2.0, "maxNegAcc": 4.5, "usualPosAcc": 2.0, "usualNegAcc": 4.5, "minGap": 2.5, "maxSpeed": 11.111, "headwayTime": 2}, "route": ["road_2_17_3", "road_2_16_3", "road_2_15_3", "road_2_14_3", "road_2_13_3", "road_2_12_2", "road_1_12_1", "road_1_13_2"], "interval": 1.0, "startTime": 1200, "endTime": 1200},
{"vehicle": {"length": 5.0, "width": 2.0, "maxPosAcc": 2.0, "maxNegAcc": 4.5, "usualPosAcc": 2.0, "usualNegAcc": 4.5, "minGap": 2.5, "maxSpeed": 11.111, "headwayTime": 2}, "route": ["road_0_12_0", "road_1_12_1", "road_1_13_0", "road_2_13_3", "road_2_12_3", "road_2_11_3", "road_2_10_3", "road_2_9_3", "road_2_8_3", "road_2_7_3", "road_2_6_3", "road_2_5_3", "road_2_4_2", "road_1_4_2"], "interval": 1.0, "startTime": 1200, "endTime": 1200},
{"vehicle": {"length": 5.0, "width": 2.0, "maxPosAcc": 2.0, "maxNegAcc": 4.5, "usualPosAcc": 2.0, "usualNegAcc": 4.5, "minGap": 2.5, "maxSpeed": 11.111, "headwayTime": 2}, "route": ["road_0_5_0", "road_1_5_0", "road_2_5_0", "road_3_5_1", "road_3_6_1", "road_3_7_1", "road_3_8_1", "road_3_9_1", "road_3_10_1", "road_3_11_1", "road_3_12_0"], "interval": 1.0, "startTime": 1200, "endTime": 1200},
{"vehicle": {"length": 5.0, "width": 2.0, "maxPosAcc": 2.0, "maxNegAcc": 4.5, "usualPosAcc": 2.0, "usualNegAcc": 4.5, "minGap": 2.5, "maxSpeed": 11.111, "headwayTime": 2}, "route": ["road_4_2_2", "road_3_2_1", "road_3_3_1", "road_3_4_1", "road_3_5_1", "road_3_6_1", "road_3_7_1", "road_3_8_1", "road_3_9_1", "road_3_10_1", "road_3_11_0"], "interval": 1.0, "startTime": 1200, "endTime": 1200},
{"vehicle": {"length": 5.0, "width": 2.0, "maxPosAcc": 2.0, "maxNegAcc": 4.5, "usualPosAcc": 2.0, "usualNegAcc": 4.5, "minGap": 2.5, "maxSpeed": 11.111, "headwayTime": 2}, "route": ["road_0_3_0", "road_1_3_0", "road_2_3_0", "road_3_3_1", "road_3_4_1", "road_3_5_1", "road_3_6_1", "road_3_7_1", "road_3_8_1", "road_3_9_1", "road_3_10_0"], "interval": 1.0, "startTime": 1201, "endTime": 1201},
{"vehicle": {"length": 5.0, "width": 2.0, "maxPosAcc": 2.0, "maxNegAcc": 4.5, "usualPosAcc": 2.0, "usualNegAcc": 4.5, "minGap": 2.5, "maxSpeed": 11.111, "headwayTime": 2}, "route": ["road_0_10_0", "road_1_10_1", "road_1_11_0", "road_2_11_3", "road_2_10_3", "road_2_9_3", "road_2_8_3", "road_2_7_3", "road_2_6_3", "road_2_5_0", "road_3_5_1", "road_3_6_0"], "interval": 1.0, "startTime": 1201, "endTime": 1201},
{"vehicle": {"length": 5.0, "width": 2.0, "maxPosAcc": 2.0, "maxNegAcc": 4.5, "usualPosAcc": 2.0, "usualNegAcc": 4.5, "minGap": 2.5, "maxSpeed": 11.111, "headwayTime": 2}, "route": ["road_4_9_2", "road_3_9_1", "road_3_10_2", "road_2_10_3", "road_2_9_3", "road_2_8_3", "road_2_7_3", "road_2_6_3", "road_2_5_3", "road_2_4_3", "road_2_3_3", "road_2_2_3", "road_2_1_0", "road_3_1_3"], "interval": 1.0, "startTime": 1205, "endTime": 1205},
{"vehicle": {"length": 5.0, "width": 2.0, "maxPosAcc": 2.0, "maxNegAcc": 4.5, "usualPosAcc": 2.0, "usualNegAcc": 4.5, "minGap": 2.5, "maxSpeed": 11.111, "headwayTime": 2}, "route": ["road_4_2_2", "road_3_2_1", "road_3_3_1", "road_3_4_1", "road_3_5_1", "road_3_6_1", "road_3_7_1", "road_3_8_1", "road_3_9_1", "road_3_10_1", "road_3_11_1", "road_3_12_1", "road_3_13_1", "road_3_14_2", "road_2_14_2", "road_1_14_1", "road_1_15_1", "road_1_16_1"], "interval": 1.0, "startTime": 1206, "endTime": 1206},
{"vehicle": {"length": 5.0, "width": 2.0, "maxPosAcc": 2.0, "maxNegAcc": 4.5, "usualPosAcc": 2.0, "usualNegAcc": 4.5, "minGap": 2.5, "maxSpeed": 11.111, "headwayTime": 2}, "route": ["road_4_6_2", "road_3_6_1", "road_3_7_0"], "interval": 1.0, "startTime": 1207, "endTime": 1207},
{"vehicle": {"length": 5.0, "width": 2.0, "maxPosAcc": 2.0, "maxNegAcc": 4.5, "usualPosAcc": 2.0, "usualNegAcc": 4.5, "minGap": 2.5, "maxSpeed": 11.111, "headwayTime": 2}, "route": ["road_0_10_0", "road_1_10_1", "road_1_11_0", "road_2_11_3", "road_2_10_3", "road_2_9_3", "road_2_8_3", "road_2_7_3", "road_2_6_3", "road_2_5_3", "road_2_4_2", "road_1_4_1", "road_1_5_2"], "interval": 1.0, "startTime": 1207, "endTime": 1207},
{"vehicle": {"length": 5.0, "width": 2.0, "maxPosAcc": 2.0, "maxNegAcc": 4.5, "usualPosAcc": 2.0, "usualNegAcc": 4.5, "minGap": 2.5, "maxSpeed": 11.111, "headwayTime": 2}, "route": ["road_0_3_0", "road_1_3_0", "road_2_3_3", "road_2_2_3", "road_2_1_0", "road_3_1_1", "road_3_2_0"], "interval": 1.0, "startTime": 1210, "endTime": 1210},
{"vehicle": {"length": 5.0, "width": 2.0, "maxPosAcc": 2.0, "maxNegAcc": 4.5, "usualPosAcc": 2.0, "usualNegAcc": 4.5, "minGap": 2.5, "maxSpeed": 11.111, "headwayTime": 2}, "route": ["road_4_10_2", "road_3_10_2", "road_2_10_3", "road_2_9_3", "road_2_8_3", "road_2_7_3", "road_2_6_3", "road_2_5_3", "road_2_4_3", "road_2_3_0", "road_3_3_0"], "interval": 1.0, "startTime": 1211, "endTime": 1211},
{"vehicle": {"length": 5.0, "width": 2.0, "maxPosAcc": 2.0, "maxNegAcc": 4.5, "usualPosAcc": 2.0, "usualNegAcc": 4.5, "minGap": 2.5, "maxSpeed": 11.111, "headwayTime": 2}, "route": ["road_0_6_0", "road_1_6_1", "road_1_7_0", "road_2_7_3", "road_2_6_3", "road_2_5_3", "road_2_4_3", "road_2_3_0", "road_3_3_0"], "interval": 1.0, "startTime": 1213, "endTime": 1213},
{"vehicle": {"length": 5.0, "width": 2.0, "maxPosAcc": 2.0, "maxNegAcc": 4.5, "usualPosAcc": 2.0, "usualNegAcc": 4.5, "minGap": 2.5, "maxSpeed": 11.111, "headwayTime": 2}, "route": ["road_4_10_2", "road_3_10_1", "road_3_11_1", "road_3_12_1", "road_3_13_0"], "interval": 1.0, "startTime": 1214, "endTime": 1214},
{"vehicle": {"length": 5.0, "width": 2.0, "maxPosAcc": 2.0, "maxNegAcc": 4.5, "usualPosAcc": 2.0, "usualNegAcc": 4.5, "minGap": 2.5, "maxSpeed": 11.111, "headwayTime": 2}, "route": ["road_4_14_2", "road_3_14_2", "road_2_14_3", "road_2_13_3", "road_2_12_3", "road_2_11_3", "road_2_10_3", "road_2_9_3", "road_2_8_3", "road_2_7_0", "road_3_7_1", "road_3_8_0"], "interval": 1.0, "startTime": 1214, "endTime": 1214},
{"vehicle": {"length": 5.0, "width": 2.0, "maxPosAcc": 2.0, "maxNegAcc": 4.5, "usualPosAcc": 2.0, "usualNegAcc": 4.5, "minGap": 2.5, "maxSpeed": 11.111, "headwayTime": 2}, "route": ["road_4_15_2", "road_3_15_1", "road_3_16_2", "road_2_16_3", "road_2_15_3", "road_2_14_3", "road_2_13_3", "road_2_12_3", "road_2_11_3", "road_2_10_3", "road_2_9_3", "road_2_8_3", "road_2_7_0", "road_3_7_0"], "interval": 1.0, "startTime": 1215, "endTime": 1215},
{"vehicle": {"length": 5.0, "width": 2.0, "maxPosAcc": 2.0, "maxNegAcc": 4.5, "usualPosAcc": 2.0, "usualNegAcc": 4.5, "minGap": 2.5, "maxSpeed": 11.111, "headwayTime": 2}, "route": ["road_4_2_2", "road_3_2_2", "road_2_2_2", "road_1_2_2"], "interval": 1.0, "startTime": 1215, "endTime": 1215},
{"vehicle": {"length": 5.0, "width": 2.0, "maxPosAcc": 2.0, "maxNegAcc": 4.5, "usualPosAcc": 2.0, "usualNegAcc": 4.5, "minGap": 2.5, "maxSpeed": 11.111, "headwayTime": 2}, "route": ["road_4_6_2", "road_3_6_1", "road_3_7_1", "road_3_8_1", "road_3_9_1", "road_3_10_1", "road_3_11_1", "road_3_12_1", "road_3_13_1", "road_3_14_1", "road_3_15_1", "road_3_16_1"], "interval": 1.0, "startTime": 1217, "endTime": 1217},
{"vehicle": {"length": 5.0, "width": 2.0, "maxPosAcc": 2.0, "maxNegAcc": 4.5, "usualPosAcc": 2.0, "usualNegAcc": 4.5, "minGap": 2.5, "maxSpeed": 11.111, "headwayTime": 2}, "route": ["road_3_17_3", "road_3_16_2", "road_2_16_1"], "interval": 1.0, "startTime": 1217, "endTime": 1217},
{"vehicle": {"length": 5.0, "width": 2.0, "maxPosAcc": 2.0, "maxNegAcc": 4.5, "usualPosAcc": 2.0, "usualNegAcc": 4.5, "minGap": 2.5, "maxSpeed": 11.111, "headwayTime": 2}, "route": ["road_4_6_2", "road_3_6_2", "road_2_6_3", "road_2_5_3", "road_2_4_3", "road_2_3_3", "road_2_2_3", "road_2_1_0", "road_3_1_3"], "interval": 1.0, "startTime": 1218, "endTime": 1218},
{"vehicle": {"length": 5.0, "width": 2.0, "maxPosAcc": 2.0, "maxNegAcc": 4.5, "usualPosAcc": 2.0, "usualNegAcc": 4.5, "minGap": 2.5, "maxSpeed": 11.111, "headwayTime": 2}, "route": ["road_2_0_1", "road_2_1_0", "road_3_1_3"], "interval": 1.0, "startTime": 1222, "endTime": 1222},
{"vehicle": {"length": 5.0, "width": 2.0, "maxPosAcc": 2.0, "maxNegAcc": 4.5, "usualPosAcc": 2.0, "usualNegAcc": 4.5, "minGap": 2.5, "maxSpeed": 11.111, "headwayTime": 2}, "route": ["road_0_6_0", "road_1_6_1", "road_1_7_0", "road_2_7_0", "road_3_7_0"], "interval": 1.0, "startTime": 1223, "endTime": 1223},
{"vehicle": {"length": 5.0, "width": 2.0, "maxPosAcc": 2.0, "maxNegAcc": 4.5, "usualPosAcc": 2.0, "usualNegAcc": 4.5, "minGap": 2.5, "maxSpeed": 11.111, "headwayTime": 2}, "route": ["road_2_0_1", "road_2_1_0", "road_3_1_1", "road_3_2_1", "road_3_3_1", "road_3_4_1", "road_3_5_1", "road_3_6_1", "road_3_7_1", "road_3_8_1", "road_3_9_1", "road_3_10_1", "road_3_11_1", "road_3_12_1", "road_3_13_1", "road_3_14_1", "road_3_15_1", "road_3_16_2", "road_2_16_1"], "interval": 1.0, "startTime": 1224, "endTime": 1224},
{"vehicle": {"length": 5.0, "width": 2.0, "maxPosAcc": 2.0, "maxNegAcc": 4.5, "usualPosAcc": 2.0, "usualNegAcc": 4.5, "minGap": 2.5, "maxSpeed": 11.111, "headwayTime": 2}, "route": ["road_4_4_2", "road_3_4_1", "road_3_5_1", "road_3_6_1", "road_3_7_1", "road_3_8_1", "road_3_9_1", "road_3_10_1", "road_3_11_1", "road_3_12_0"], "interval": 1.0, "startTime": 1226, "endTime": 1226},
{"vehicle": {"length": 5.0, "width": 2.0, "maxPosAcc": 2.0, "maxNegAcc": 4.5, "usualPosAcc": 2.0, "usualNegAcc": 4.5, "minGap": 2.5, "maxSpeed": 11.111, "headwayTime": 2}, "route": ["road_4_4_2", "road_3_4_1", "road_3_5_1", "road_3_6_1", "road_3_7_1", "road_3_8_1", "road_3_9_1", "road_3_10_1", "road_3_11_1", "road_3_12_1", "road_3_13_1", "road_3_14_0"], "interval": 1.0, "startTime": 1235, "endTime": 1235},
{"vehicle": {"length": 5.0, "width": 2.0, "maxPosAcc": 2.0, "maxNegAcc": 4.5, "usualPosAcc": 2.0, "usualNegAcc": 4.5, "minGap": 2.5, "maxSpeed": 11.111, "headwayTime": 2}, "route": ["road_2_0_1", "road_2_1_0", "road_3_1_3"], "interval": 1.0, "startTime": 1236, "endTime": 1236},
{"vehicle": {"length": 5.0, "width": 2.0, "maxPosAcc": 2.0, "maxNegAcc": 4.5, "usualPosAcc": 2.0, "usualNegAcc": 4.5, "minGap": 2.5, "maxSpeed": 11.111, "headwayTime": 2}, "route": ["road_0_14_0", "road_1_14_1", "road_1_15_0", "road_2_15_3", "road_2_14_3", "road_2_13_3", "road_2_12_2", "road_1_12_1", "road_1_13_2"], "interval": 1.0, "startTime": 1239, "endTime": 1239},
{"vehicle": {"length": 5.0, "width": 2.0, "maxPosAcc": 2.0, "maxNegAcc": 4.5, "usualPosAcc": 2.0, "usualNegAcc": 4.5, "minGap": 2.5, "maxSpeed": 11.111, "headwayTime": 2}, "route": ["road_3_17_3", "road_3_16_2", "road_2_16_3", "road_2_15_3", "road_2_14_3", "road_2_13_3", "road_2_12_3", "road_2_11_3", "road_2_10_3", "road_2_9_3", "road_2_8_3", "road_2_7_3", "road_2_6_3", "road_2_5_3", "road_2_4_3", "road_2_3_3", "road_2_2_3", "road_2_1_0", "road_3_1_3"], "interval": 1.0, "startTime": 1247, "endTime": 1247},
{"vehicle": {"length": 5.0, "width": 2.0, "maxPosAcc": 2.0, "maxNegAcc": 4.5, "usualPosAcc": 2.0, "usualNegAcc": 4.5, "minGap": 2.5, "maxSpeed": 11.111, "headwayTime": 2}, "route": ["road_4_13_2", "road_3_13_1", "road_3_14_2", "road_2_14_3", "road_2_13_3", "road_2_12_3", "road_2_11_3", "road_2_10_3", "road_2_9_3", "road_2_8_3", "road_2_7_3", "road_2_6_3", "road_2_5_3", "road_2_4_3", "road_2_3_3", "road_2_2_3", "road_2_1_3"], "interval": 1.0, "startTime": 1249, "endTime": 1249},
{"vehicle": {"length": 5.0, "width": 2.0, "maxPosAcc": 2.0, "maxNegAcc": 4.5, "usualPosAcc": 2.0, "usualNegAcc": 4.5, "minGap": 2.5, "maxSpeed": 11.111, "headwayTime": 2}, "route": ["road_3_17_3", "road_3_16_2", "road_2_16_3", "road_2_15_3", "road_2_14_3", "road_2_13_3", "road_2_12_3", "road_2_11_3", "road_2_10_3", "road_2_9_0", "road_3_9_1", "road_3_10_0"], "interval": 1.0, "startTime": 1249, "endTime": 1249},
{"vehicle": {"length": 5.0, "width": 2.0, "maxPosAcc": 2.0, "maxNegAcc": 4.5, "usualPosAcc": 2.0, "usualNegAcc": 4.5, "minGap": 2.5, "maxSpeed": 11.111, "headwayTime": 2}, "route": ["road_4_15_2", "road_3_15_1", "road_3_16_2", "road_2_16_1"], "interval": 1.0, "startTime": 1252, "endTime": 1252},
{"vehicle": {"length": 5.0, "width": 2.0, "maxPosAcc": 2.0, "maxNegAcc": 4.5, "usualPosAcc": 2.0, "usualNegAcc": 4.5, "minGap": 2.5, "maxSpeed": 11.111, "headwayTime": 2}, "route": ["road_2_17_3", "road_2_16_3", "road_2_15_3", "road_2_14_3", "road_2_13_3", "road_2_12_3", "road_2_11_3", "road_2_10_3", "road_2_9_3", "road_2_8_3", "road_2_7_3", "road_2_6_3", "road_2_5_3", "road_2_4_3", "road_2_3_3", "road_2_2_3", "road_2_1_0", "road_3_1_3"], "interval": 1.0, "startTime": 1252, "endTime": 1252},
{"vehicle": {"length": 5.0, "width": 2.0, "maxPosAcc": 2.0, "maxNegAcc": 4.5, "usualPosAcc": 2.0, "usualNegAcc": 4.5, "minGap": 2.5, "maxSpeed": 11.111, "headwayTime": 2}, "route": ["road_0_2_0", "road_1_2_1", "road_1_3_0", "road_2_3_0", "road_3_3_0"], "interval": 1.0, "startTime": 1252, "endTime": 1252},
{"vehicle": {"length": 5.0, "width": 2.0, "maxPosAcc": 2.0, "maxNegAcc": 4.5, "usualPosAcc": 2.0, "usualNegAcc": 4.5, "minGap": 2.5, "maxSpeed": 11.111, "headwayTime": 2}, "route": ["road_4_13_2", "road_3_13_1", "road_3_14_2", "road_2_14_3", "road_2_13_3", "road_2_12_3", "road_2_11_3", "road_2_10_3", "road_2_9_3", "road_2_8_3", "road_2_7_3", "road_2_6_2", "road_1_6_2"], "interval": 1.0, "startTime": 1253, "endTime": 1253},
{"vehicle": {"length": 5.0, "width": 2.0, "maxPosAcc": 2.0, "maxNegAcc": 4.5, "usualPosAcc": 2.0, "usualNegAcc": 4.5, "minGap": 2.5, "maxSpeed": 11.111, "headwayTime": 2}, "route": ["road_4_12_2", "road_3_12_2", "road_2_12_3", "road_2_11_3", "road_2_10_3", "road_2_9_3", "road_2_8_3", "road_2_7_3", "road_2_6_3", "road_2_5_0", "road_3_5_0"], "interval": 1.0, "startTime": 1255, "endTime": 1255},
{"vehicle": {"length": 5.0, "width": 2.0, "maxPosAcc": 2.0, "maxNegAcc": 4.5, "usualPosAcc": 2.0, "usualNegAcc": 4.5, "minGap": 2.5, "maxSpeed": 11.111, "headwayTime": 2}, "route": ["road_3_17_3", "road_3_16_2", "road_2_16_3", "road_2_15_3", "road_2_14_3", "road_2_13_3", "road_2_12_3", "road_2_11_3", "road_2_10_3", "road_2_9_3", "road_2_8_3", "road_2_7_3", "road_2_6_3", "road_2_5_3", "road_2_4_3", "road_2_3_3", "road_2_2_2", "road_1_2_1", "road_1_3_2"], "interval": 1.0, "startTime": 1258, "endTime": 1258},
{"vehicle": {"length": 5.0, "width": 2.0, "maxPosAcc": 2.0, "maxNegAcc": 4.5, "usualPosAcc": 2.0, "usualNegAcc": 4.5, "minGap": 2.5, "maxSpeed": 11.111, "headwayTime": 2}, "route": ["road_4_15_2", "road_3_15_1", "road_3_16_2", "road_2_16_3", "road_2_15_3", "road_2_14_3", "road_2_13_3", "road_2_12_3", "road_2_11_3", "road_2_10_3", "road_2_9_3", "road_2_8_3", "road_2_7_3", "road_2_6_3", "road_2_5_3", "road_2_4_3", "road_2_3_0", "road_3_3_0"], "interval": 1.0, "startTime": 1260, "endTime": 1260},
{"vehicle": {"length": 5.0, "width": 2.0, "maxPosAcc": 2.0, "maxNegAcc": 4.5, "usualPosAcc": 2.0, "usualNegAcc": 4.5, "minGap": 2.5, "maxSpeed": 11.111, "headwayTime": 2}, "route": ["road_4_4_2", "road_3_4_1", "road_3_5_1", "road_3_6_1", "road_3_7_1", "road_3_8_1", "road_3_9_1", "road_3_10_1", "road_3_11_1", "road_3_12_1", "road_3_13_1", "road_3_14_2", "road_2_14_2", "road_1_14_1", "road_1_15_1", "road_1_16_1"], "interval": 1.0, "startTime": 1260, "endTime": 1260},
{"vehicle": {"length": 5.0, "width": 2.0, "maxPosAcc": 2.0, "maxNegAcc": 4.5, "usualPosAcc": 2.0, "usualNegAcc": 4.5, "minGap": 2.5, "maxSpeed": 11.111, "headwayTime": 2}, "route": ["road_0_4_0", "road_1_4_1", "road_1_5_0", "road_2_5_3", "road_2_4_3", "road_2_3_0", "road_3_3_0"], "interval": 1.0, "startTime": 1260, "endTime": 1260},
{"vehicle": {"length": 5.0, "width": 2.0, "maxPosAcc": 2.0, "maxNegAcc": 4.5, "usualPosAcc": 2.0, "usualNegAcc": 4.5, "minGap": 2.5, "maxSpeed": 11.111, "headwayTime": 2}, "route": ["road_3_0_1", "road_3_1_1", "road_3_2_1", "road_3_3_1", "road_3_4_1", "road_3_5_1", "road_3_6_1", "road_3_7_1", "road_3_8_1", "road_3_9_1", "road_3_10_1", "road_3_11_1", "road_3_12_1", "road_3_13_1", "road_3_14_1", "road_3_15_1", "road_3_16_1"], "interval": 1.0, "startTime": 1260, "endTime": 1260},
{"vehicle": {"length": 5.0, "width": 2.0, "maxPosAcc": 2.0, "maxNegAcc": 4.5, "usualPosAcc": 2.0, "usualNegAcc": 4.5, "minGap": 2.5, "maxSpeed": 11.111, "headwayTime": 2}, "route": ["road_4_5_2", "road_3_5_1", "road_3_6_1", "road_3_7_1", "road_3_8_1", "road_3_9_1", "road_3_10_1", "road_3_11_1", "road_3_12_1", "road_3_13_1", "road_3_14_1", "road_3_15_0"], "interval": 1.0, "startTime": 1260, "endTime": 1260},
{"vehicle": {"length": 5.0, "width": 2.0, "maxPosAcc": 2.0, "maxNegAcc": 4.5, "usualPosAcc": 2.0, "usualNegAcc": 4.5, "minGap": 2.5, "maxSpeed": 11.111, "headwayTime": 2}, "route": ["road_4_6_2", "road_3_6_1", "road_3_7_1", "road_3_8_1", "road_3_9_1", "road_3_10_2", "road_2_10_2", "road_1_10_1", "road_1_11_1", "road_1_12_1", "road_1_13_2"], "interval": 1.0, "startTime": 1260, "endTime": 1260},
{"vehicle": {"length": 5.0, "width": 2.0, "maxPosAcc": 2.0, "maxNegAcc": 4.5, "usualPosAcc": 2.0, "usualNegAcc": 4.5, "minGap": 2.5, "maxSpeed": 11.111, "headwayTime": 2}, "route": ["road_4_7_2", "road_3_7_1", "road_3_8_2", "road_2_8_2", "road_1_8_1", "road_1_9_1", "road_1_10_1", "road_1_11_1", "road_1_12_1", "road_1_13_2"], "interval": 1.0, "startTime": 1260, "endTime": 1260},
{"vehicle": {"length": 5.0, "width": 2.0, "maxPosAcc": 2.0, "maxNegAcc": 4.5, "usualPosAcc": 2.0, "usualNegAcc": 4.5, "minGap": 2.5, "maxSpeed": 11.111, "headwayTime": 2}, "route": ["road_4_9_2", "road_3_9_1", "road_3_10_2", "road_2_10_3", "road_2_9_3", "road_2_8_3", "road_2_7_3", "road_2_6_3", "road_2_5_3", "road_2_4_3", "road_2_3_3", "road_2_2_3", "road_2_1_0", "road_3_1_3"], "interval": 1.0, "startTime": 1260, "endTime": 1260},
{"vehicle": {"length": 5.0, "width": 2.0, "maxPosAcc": 2.0, "maxNegAcc": 4.5, "usualPosAcc": 2.0, "usualNegAcc": 4.5, "minGap": 2.5, "maxSpeed": 11.111, "headwayTime": 2}, "route": ["road_4_10_2", "road_3_10_1", "road_3_11_1", "road_3_12_1", "road_3_13_1", "road_3_14_1", "road_3_15_0"], "interval": 1.0, "startTime": 1260, "endTime": 1260},
{"vehicle": {"length": 5.0, "width": 2.0, "maxPosAcc": 2.0, "maxNegAcc": 4.5, "usualPosAcc": 2.0, "usualNegAcc": 4.5, "minGap": 2.5, "maxSpeed": 11.111, "headwayTime": 2}, "route": ["road_4_11_2", "road_3_11_1", "road_3_12_2", "road_2_12_2", "road_1_12_1", "road_1_13_2"], "interval": 1.0, "startTime": 1260, "endTime": 1260},
{"vehicle": {"length": 5.0, "width": 2.0, "maxPosAcc": 2.0, "maxNegAcc": 4.5, "usualPosAcc": 2.0, "usualNegAcc": 4.5, "minGap": 2.5, "maxSpeed": 11.111, "headwayTime": 2}, "route": ["road_4_12_2", "road_3_12_2", "road_2_12_3", "road_2_11_0", "road_3_11_0"], "interval": 1.0, "startTime": 1260, "endTime": 1260},
{"vehicle": {"length": 5.0, "width": 2.0, "maxPosAcc": 2.0, "maxNegAcc": 4.5, "usualPosAcc": 2.0, "usualNegAcc": 4.5, "minGap": 2.5, "maxSpeed": 11.111, "headwayTime": 2}, "route": ["road_4_13_2", "road_3_13_1", "road_3_14_2", "road_2_14_3", "road_2_13_3", "road_2_12_2", "road_1_12_2"], "interval": 1.0, "startTime": 1260, "endTime": 1260},
{"vehicle": {"length": 5.0, "width": 2.0, "maxPosAcc": 2.0, "maxNegAcc": 4.5, "usualPosAcc": 2.0, "usualNegAcc": 4.5, "minGap": 2.5, "maxSpeed": 11.111, "headwayTime": 2}, "route": ["road_4_14_2", "road_3_14_1", "road_3_15_1", "road_3_16_2", "road_2_16_1"], "interval": 1.0, "startTime": 1260, "endTime": 1260},
{"vehicle": {"length": 5.0, "width": 2.0, "maxPosAcc": 2.0, "maxNegAcc": 4.5, "usualPosAcc": 2.0, "usualNegAcc": 4.5, "minGap": 2.5, "maxSpeed": 11.111, "headwayTime": 2}, "route": ["road_3_17_3", "road_3_16_2", "road_2_16_3", "road_2_15_3", "road_2_14_3", "road_2_13_3", "road_2_12_3", "road_2_11_3", "road_2_10_3", "road_2_9_3", "road_2_8_3", "road_2_7_3", "road_2_6_3", "road_2_5_3", "road_2_4_3", "road_2_3_3", "road_2_2_3", "road_2_1_3"], "interval": 1.0, "startTime": 1260, "endTime": 1260},
{"vehicle": {"length": 5.0, "width": 2.0, "maxPosAcc": 2.0, "maxNegAcc": 4.5, "usualPosAcc": 2.0, "usualNegAcc": 4.5, "minGap": 2.5, "maxSpeed": 11.111, "headwayTime": 2}, "route": ["road_2_0_1", "road_2_1_0", "road_3_1_1", "road_3_2_1", "road_3_3_1", "road_3_4_1", "road_3_5_1", "road_3_6_1", "road_3_7_1", "road_3_8_1", "road_3_9_1", "road_3_10_1", "road_3_11_1", "road_3_12_1", "road_3_13_1", "road_3_14_1", "road_3_15_0"], "interval": 1.0, "startTime": 1260, "endTime": 1260},
{"vehicle": {"length": 5.0, "width": 2.0, "maxPosAcc": 2.0, "maxNegAcc": 4.5, "usualPosAcc": 2.0, "usualNegAcc": 4.5, "minGap": 2.5, "maxSpeed": 11.111, "headwayTime": 2}, "route": ["road_1_0_1", "road_1_1_0", "road_2_1_0", "road_3_1_3"], "interval": 1.0, "startTime": 1260, "endTime": 1260},
{"vehicle": {"length": 5.0, "width": 2.0, "maxPosAcc": 2.0, "maxNegAcc": 4.5, "usualPosAcc": 2.0, "usualNegAcc": 4.5, "minGap": 2.5, "maxSpeed": 11.111, "headwayTime": 2}, "route": ["road_0_14_0", "road_1_14_1", "road_1_15_1", "road_1_16_0", "road_2_16_1"], "interval": 1.0, "startTime": 1260, "endTime": 1260},
{"vehicle": {"length": 5.0, "width": 2.0, "maxPosAcc": 2.0, "maxNegAcc": 4.5, "usualPosAcc": 2.0, "usualNegAcc": 4.5, "minGap": 2.5, "maxSpeed": 11.111, "headwayTime": 2}, "route": ["road_0_3_0", "road_1_3_0", "road_2_3_0", "road_3_3_1", "road_3_4_1", "road_3_5_1", "road_3_6_1", "road_3_7_1", "road_3_8_1", "road_3_9_1", "road_3_10_1", "road_3_11_0"], "interval": 1.0, "startTime": 1260, "endTime": 1260},
{"vehicle": {"length": 5.0, "width": 2.0, "maxPosAcc": 2.0, "maxNegAcc": 4.5, "usualPosAcc": 2.0, "usualNegAcc": 4.5, "minGap": 2.5, "maxSpeed": 11.111, "headwayTime": 2}, "route": ["road_2_17_3", "road_2_16_2", "road_1_16_1"], "interval": 1.0, "startTime": 1260, "endTime": 1260},
{"vehicle": {"length": 5.0, "width": 2.0, "maxPosAcc": 2.0, "maxNegAcc": 4.5, "usualPosAcc": 2.0, "usualNegAcc": 4.5, "minGap": 2.5, "maxSpeed": 11.111, "headwayTime": 2}, "route": ["road_0_11_0", "road_1_11_0", "road_2_11_0", "road_3_11_1", "road_3_12_1", "road_3_13_0"], "interval": 1.0, "startTime": 1260, "endTime": 1260},
{"vehicle": {"length": 5.0, "width": 2.0, "maxPosAcc": 2.0, "maxNegAcc": 4.5, "usualPosAcc": 2.0, "usualNegAcc": 4.5, "minGap": 2.5, "maxSpeed": 11.111, "headwayTime": 2}, "route": ["road_0_12_0", "road_1_12_1", "road_1_13_0", "road_2_13_3", "road_2_12_3", "road_2_11_3", "road_2_10_3", "road_2_9_3", "road_2_8_3", "road_2_7_3", "road_2_6_3", "road_2_5_3", "road_2_4_3", "road_2_3_3", "road_2_2_3", "road_2_1_3"], "interval": 1.0, "startTime": 1260, "endTime": 1260},
{"vehicle": {"length": 5.0, "width": 2.0, "maxPosAcc": 2.0, "maxNegAcc": 4.5, "usualPosAcc": 2.0, "usualNegAcc": 4.5, "minGap": 2.5, "maxSpeed": 11.111, "headwayTime": 2}, "route": ["road_0_6_0", "road_1_6_1", "road_1_7_0", "road_2_7_0", "road_3_7_1", "road_3_8_1", "road_3_9_1", "road_3_10_0"], "interval": 1.0, "startTime": 1260, "endTime": 1260},
{"vehicle": {"length": 5.0, "width": 2.0, "maxPosAcc": 2.0, "maxNegAcc": 4.5, "usualPosAcc": 2.0, "usualNegAcc": 4.5, "minGap": 2.5, "maxSpeed": 11.111, "headwayTime": 2}, "route": ["road_1_17_3", "road_1_16_0", "road_2_16_3", "road_2_15_3", "road_2_14_2", "road_1_14_1", "road_1_15_2"], "interval": 1.0, "startTime": 1260, "endTime": 1260},
{"vehicle": {"length": 5.0, "width": 2.0, "maxPosAcc": 2.0, "maxNegAcc": 4.5, "usualPosAcc": 2.0, "usualNegAcc": 4.5, "minGap": 2.5, "maxSpeed": 11.111, "headwayTime": 2}, "route": ["road_4_2_2", "road_3_2_1", "road_3_3_1", "road_3_4_1", "road_3_5_1", "road_3_6_1", "road_3_7_1", "road_3_8_1", "road_3_9_1", "road_3_10_1", "road_3_11_1", "road_3_12_1", "road_3_13_1", "road_3_14_1", "road_3_15_1", "road_3_16_2", "road_2_16_1"], "interval": 1.0, "startTime": 1260, "endTime": 1260},
{"vehicle": {"length": 5.0, "width": 2.0, "maxPosAcc": 2.0, "maxNegAcc": 4.5, "usualPosAcc": 2.0, "usualNegAcc": 4.5, "minGap": 2.5, "maxSpeed": 11.111, "headwayTime": 2}, "route": ["road_2_17_3", "road_2_16_3", "road_2_15_3", "road_2_14_3", "road_2_13_3", "road_2_12_3", "road_2_11_3", "road_2_10_3", "road_2_9_3", "road_2_8_3", "road_2_7_3", "road_2_6_3", "road_2_5_0", "road_3_5_1", "road_3_6_0"], "interval": 1.0, "startTime": 1261, "endTime": 1261},
{"vehicle": {"length": 5.0, "width": 2.0, "maxPosAcc": 2.0, "maxNegAcc": 4.5, "usualPosAcc": 2.0, "usualNegAcc": 4.5, "minGap": 2.5, "maxSpeed": 11.111, "headwayTime": 2}, "route": ["road_4_5_2", "road_3_5_1", "road_3_6_2", "road_2_6_3", "road_2_5_3", "road_2_4_3", "road_2_3_3", "road_2_2_3", "road_2_1_0", "road_3_1_3"], "interval": 1.0, "startTime": 1263, "endTime": 1263},
{"vehicle": {"length": 5.0, "width": 2.0, "maxPosAcc": 2.0, "maxNegAcc": 4.5, "usualPosAcc": 2.0, "usualNegAcc": 4.5, "minGap": 2.5, "maxSpeed": 11.111, "headwayTime": 2}, "route": ["road_3_0_1", "road_3_1_1", "road_3_2_0"], "interval": 1.0, "startTime": 1264, "endTime": 1264},
{"vehicle": {"length": 5.0, "width": 2.0, "maxPosAcc": 2.0, "maxNegAcc": 4.5, "usualPosAcc": 2.0, "usualNegAcc": 4.5, "minGap": 2.5, "maxSpeed": 11.111, "headwayTime": 2}, "route": ["road_4_5_2", "road_3_5_1", "road_3_6_2", "road_2_6_3", "road_2_5_3", "road_2_4_3", "road_2_3_3", "road_2_2_2", "road_1_2_2"], "interval": 1.0, "startTime": 1264, "endTime": 1264},
{"vehicle": {"length": 5.0, "width": 2.0, "maxPosAcc": 2.0, "maxNegAcc": 4.5, "usualPosAcc": 2.0, "usualNegAcc": 4.5, "minGap": 2.5, "maxSpeed": 11.111, "headwayTime": 2}, "route": ["road_4_2_2", "road_3_2_1", "road_3_3_1", "road_3_4_2", "road_2_4_2", "road_1_4_1", "road_1_5_2"], "interval": 1.0, "startTime": 1266, "endTime": 1266},
{"vehicle": {"length": 5.0, "width": 2.0, "maxPosAcc": 2.0, "maxNegAcc": 4.5, "usualPosAcc": 2.0, "usualNegAcc": 4.5, "minGap": 2.5, "maxSpeed": 11.111, "headwayTime": 2}, "route": ["road_3_0_1", "road_3_1_2", "road_2_1_2", "road_1_1_3"], "interval": 1.0, "startTime": 1268, "endTime": 1268},
{"vehicle": {"length": 5.0, "width": 2.0, "maxPosAcc": 2.0, "maxNegAcc": 4.5, "usualPosAcc": 2.0, "usualNegAcc": 4.5, "minGap": 2.5, "maxSpeed": 11.111, "headwayTime": 2}, "route": ["road_4_13_2", "road_3_13_1", "road_3_14_2", "road_2_14_3", "road_2_13_3", "road_2_12_3", "road_2_11_3", "road_2_10_3", "road_2_9_0", "road_3_9_0"], "interval": 1.0, "startTime": 1269, "endTime": 1269},
{"vehicle": {"length": 5.0, "width": 2.0, "maxPosAcc": 2.0, "maxNegAcc": 4.5, "usualPosAcc": 2.0, "usualNegAcc": 4.5, "minGap": 2.5, "maxSpeed": 11.111, "headwayTime": 2}, "route": ["road_1_0_1", "road_1_1_0", "road_2_1_3"], "interval": 1.0, "startTime": 1272, "endTime": 1272},
{"vehicle": {"length": 5.0, "width": 2.0, "maxPosAcc": 2.0, "maxNegAcc": 4.5, "usualPosAcc": 2.0, "usualNegAcc": 4.5, "minGap": 2.5, "maxSpeed": 11.111, "headwayTime": 2}, "route": ["road_4_4_2", "road_3_4_1", "road_3_5_1", "road_3_6_1", "road_3_7_1", "road_3_8_1", "road_3_9_1", "road_3_10_1", "road_3_11_1", "road_3_12_1", "road_3_13_0"], "interval": 1.0, "startTime": 1277, "endTime": 1277},
{"vehicle": {"length": 5.0, "width": 2.0, "maxPosAcc": 2.0, "maxNegAcc": 4.5, "usualPosAcc": 2.0, "usualNegAcc": 4.5, "minGap": 2.5, "maxSpeed": 11.111, "headwayTime": 2}, "route": ["road_2_17_3", "road_2_16_3", "road_2_15_3", "road_2_14_3", "road_2_13_3", "road_2_12_3", "road_2_11_3", "road_2_10_3", "road_2_9_3", "road_2_8_3", "road_2_7_3", "road_2_6_3", "road_2_5_0", "road_3_5_0"], "interval": 1.0, "startTime": 1279, "endTime": 1279},
{"vehicle": {"length": 5.0, "width": 2.0, "maxPosAcc": 2.0, "maxNegAcc": 4.5, "usualPosAcc": 2.0, "usualNegAcc": 4.5, "minGap": 2.5, "maxSpeed": 11.111, "headwayTime": 2}, "route": ["road_4_5_2", "road_3_5_1", "road_3_6_2", "road_2_6_3", "road_2_5_3", "road_2_4_3", "road_2_3_3", "road_2_2_2", "road_1_2_2"], "interval": 1.0, "startTime": 1282, "endTime": 1282},
{"vehicle": {"length": 5.0, "width": 2.0, "maxPosAcc": 2.0, "maxNegAcc": 4.5, "usualPosAcc": 2.0, "usualNegAcc": 4.5, "minGap": 2.5, "maxSpeed": 11.111, "headwayTime": 2}, "route": ["road_4_6_2", "road_3_6_1", "road_3_7_0"], "interval": 1.0, "startTime": 1284, "endTime": 1284},
{"vehicle": {"length": 5.0, "width": 2.0, "maxPosAcc": 2.0, "maxNegAcc": 4.5, "usualPosAcc": 2.0, "usualNegAcc": 4.5, "minGap": 2.5, "maxSpeed": 11.111, "headwayTime": 2}, "route": ["road_4_6_2", "road_3_6_1", "road_3_7_1", "road_3_8_1", "road_3_9_1", "road_3_10_1", "road_3_11_1", "road_3_12_1", "road_3_13_1", "road_3_14_2", "road_2_14_2", "road_1_14_1", "road_1_15_1", "road_1_16_1"], "interval": 1.0, "startTime": 1285, "endTime": 1285},
{"vehicle": {"length": 5.0, "width": 2.0, "maxPosAcc": 2.0, "maxNegAcc": 4.5, "usualPosAcc": 2.0, "usualNegAcc": 4.5, "minGap": 2.5, "maxSpeed": 11.111, "headwayTime": 2}, "route": ["road_0_14_0", "road_1_14_1", "road_1_15_1", "road_1_16_0", "road_2_16_0", "road_3_16_1"], "interval": 1.0, "startTime": 1286, "endTime": 1286},
{"vehicle": {"length": 5.0, "width": 2.0, "maxPosAcc": 2.0, "maxNegAcc": 4.5, "usualPosAcc": 2.0, "usualNegAcc": 4.5, "minGap": 2.5, "maxSpeed": 11.111, "headwayTime": 2}, "route": ["road_4_9_2", "road_3_9_1", "road_3_10_0"], "interval": 1.0, "startTime": 1287, "endTime": 1287},
{"vehicle": {"length": 5.0, "width": 2.0, "maxPosAcc": 2.0, "maxNegAcc": 4.5, "usualPosAcc": 2.0, "usualNegAcc": 4.5, "minGap": 2.5, "maxSpeed": 11.111, "headwayTime": 2}, "route": ["road_0_15_0", "road_1_15_0", "road_2_15_3", "road_2_14_3", "road_2_13_3", "road_2_12_3", "road_2_11_3", "road_2_10_3", "road_2_9_3", "road_2_8_3", "road_2_7_0", "road_3_7_0"], "interval": 1.0, "startTime": 1290, "endTime": 1290},
{"vehicle": {"length": 5.0, "width": 2.0, "maxPosAcc": 2.0, "maxNegAcc": 4.5, "usualPosAcc": 2.0, "usualNegAcc": 4.5, "minGap": 2.5, "maxSpeed": 11.111, "headwayTime": 2}, "route": ["road_0_6_0", "road_1_6_1", "road_1_7_0", "road_2_7_3", "road_2_6_3", "road_2_5_3", "road_2_4_3", "road_2_3_3", "road_2_2_2", "road_1_2_2"], "interval": 1.0, "startTime": 1290, "endTime": 1290},
{"vehicle": {"length": 5.0, "width": 2.0, "maxPosAcc": 2.0, "maxNegAcc": 4.5, "usualPosAcc": 2.0, "usualNegAcc": 4.5, "minGap": 2.5, "maxSpeed": 11.111, "headwayTime": 2}, "route": ["road_2_0_1", "road_2_1_0", "road_3_1_1", "road_3_2_1", "road_3_3_1", "road_3_4_1", "road_3_5_0"], "interval": 1.0, "startTime": 1292, "endTime": 1292},
{"vehicle": {"length": 5.0, "width": 2.0, "maxPosAcc": 2.0, "maxNegAcc": 4.5, "usualPosAcc": 2.0, "usualNegAcc": 4.5, "minGap": 2.5, "maxSpeed": 11.111, "headwayTime": 2}, "route": ["road_4_7_2", "road_3_7_1", "road_3_8_1", "road_3_9_1", "road_3_10_1", "road_3_11_1", "road_3_12_2", "road_2_12_2", "road_1_12_1", "road_1_13_1", "road_1_14_2"], "interval": 1.0, "startTime": 1295, "endTime": 1295},
{"vehicle": {"length": 5.0, "width": 2.0, "maxPosAcc": 2.0, "maxNegAcc": 4.5, "usualPosAcc": 2.0, "usualNegAcc": 4.5, "minGap": 2.5, "maxSpeed": 11.111, "headwayTime": 2}, "route": ["road_4_15_2", "road_3_15_1", "road_3_16_2", "road_2_16_2", "road_1_16_1"], "interval": 1.0, "startTime": 1297, "endTime": 1297},
{"vehicle": {"length": 5.0, "width": 2.0, "maxPosAcc": 2.0, "maxNegAcc": 4.5, "usualPosAcc": 2.0, "usualNegAcc": 4.5, "minGap": 2.5, "maxSpeed": 11.111, "headwayTime": 2}, "route": ["road_4_12_2", "road_3_12_1", "road_3_13_1", "road_3_14_1", "road_3_15_1", "road_3_16_1"], "interval": 1.0, "startTime": 1297, "endTime": 1297},
{"vehicle": {"length": 5.0, "width": 2.0, "maxPosAcc": 2.0, "maxNegAcc": 4.5, "usualPosAcc": 2.0, "usualNegAcc": 4.5, "minGap": 2.5, "maxSpeed": 11.111, "headwayTime": 2}, "route": ["road_4_6_2", "road_3_6_1", "road_3_7_1", "road_3_8_1", "road_3_9_1", "road_3_10_1", "road_3_11_1", "road_3_12_1", "road_3_13_1", "road_3_14_1", "road_3_15_0"], "interval": 1.0, "startTime": 1300, "endTime": 1300},
{"vehicle": {"length": 5.0, "width": 2.0, "maxPosAcc": 2.0, "maxNegAcc": 4.5, "usualPosAcc": 2.0, "usualNegAcc": 4.5, "minGap": 2.5, "maxSpeed": 11.111, "headwayTime": 2}, "route": ["road_2_0_1", "road_2_1_0", "road_3_1_1", "road_3_2_1", "road_3_3_1", "road_3_4_1", "road_3_5_0"], "interval": 1.0, "startTime": 1301, "endTime": 1301},
{"vehicle": {"length": 5.0, "width": 2.0, "maxPosAcc": 2.0, "maxNegAcc": 4.5, "usualPosAcc": 2.0, "usualNegAcc": 4.5, "minGap": 2.5, "maxSpeed": 11.111, "headwayTime": 2}, "route": ["road_2_0_1", "road_2_1_0", "road_3_1_1", "road_3_2_1", "road_3_3_1", "road_3_4_1", "road_3_5_1", "road_3_6_1", "road_3_7_1", "road_3_8_1", "road_3_9_1", "road_3_10_1", "road_3_11_1", "road_3_12_1", "road_3_13_1", "road_3_14_0"], "interval": 1.0, "startTime": 1302, "endTime": 1302},
{"vehicle": {"length": 5.0, "width": 2.0, "maxPosAcc": 2.0, "maxNegAcc": 4.5, "usualPosAcc": 2.0, "usualNegAcc": 4.5, "minGap": 2.5, "maxSpeed": 11.111, "headwayTime": 2}, "route": ["road_2_0_1", "road_2_1_2", "road_1_1_1", "road_1_2_1", "road_1_3_1", "road_1_4_1", "road_1_5_1", "road_1_6_1", "road_1_7_1", "road_1_8_1", "road_1_9_2"], "interval": 1.0, "startTime": 1307, "endTime": 1307},
{"vehicle": {"length": 5.0, "width": 2.0, "maxPosAcc": 2.0, "maxNegAcc": 4.5, "usualPosAcc": 2.0, "usualNegAcc": 4.5, "minGap": 2.5, "maxSpeed": 11.111, "headwayTime": 2}, "route": ["road_4_5_2", "road_3_5_1", "road_3_6_2", "road_2_6_3", "road_2_5_3", "road_2_4_3", "road_2_3_3", "road_2_2_3", "road_2_1_3"], "interval": 1.0, "startTime": 1309, "endTime": 1309},
{"vehicle": {"length": 5.0, "width": 2.0, "maxPosAcc": 2.0, "maxNegAcc": 4.5, "usualPosAcc": 2.0, "usualNegAcc": 4.5, "minGap": 2.5, "maxSpeed": 11.111, "headwayTime": 2}, "route": ["road_3_17_3", "road_3_16_2", "road_2_16_3", "road_2_15_3", "road_2_14_3", "road_2_13_3", "road_2_12_3", "road_2_11_3", "road_2_10_3", "road_2_9_3", "road_2_8_3", "road_2_7_3", "road_2_6_3", "road_2_5_3", "road_2_4_3", "road_2_3_3", "road_2_2_3", "road_2_1_0", "road_3_1_3"], "interval": 1.0, "startTime": 1311, "endTime": 1311},
{"vehicle": {"length": 5.0, "width": 2.0, "maxPosAcc": 2.0, "maxNegAcc": 4.5, "usualPosAcc": 2.0, "usualNegAcc": 4.5, "minGap": 2.5, "maxSpeed": 11.111, "headwayTime": 2}, "route": ["road_3_0_1", "road_3_1_1", "road_3_2_1", "road_3_3_1", "road_3_4_1", "road_3_5_1", "road_3_6_1", "road_3_7_1", "road_3_8_1", "road_3_9_1", "road_3_10_1", "road_3_11_1", "road_3_12_0"], "interval": 1.0, "startTime": 1316, "endTime": 1316},
{"vehicle": {"length": 5.0, "width": 2.0, "maxPosAcc": 2.0, "maxNegAcc": 4.5, "usualPosAcc": 2.0, "usualNegAcc": 4.5, "minGap": 2.5, "maxSpeed": 11.111, "headwayTime": 2}, "route": ["road_4_14_2", "road_3_14_2", "road_2_14_3", "road_2_13_3", "road_2_12_3", "road_2_11_3", "road_2_10_3", "road_2_9_3", "road_2_8_3", "road_2_7_3", "road_2_6_3", "road_2_5_3", "road_2_4_3", "road_2_3_3", "road_2_2_3", "road_2_1_3"], "interval": 1.0, "startTime": 1318, "endTime": 1318},
{"vehicle": {"length": 5.0, "width": 2.0, "maxPosAcc": 2.0, "maxNegAcc": 4.5, "usualPosAcc": 2.0, "usualNegAcc": 4.5, "minGap": 2.5, "maxSpeed": 11.111, "headwayTime": 2}, "route": ["road_4_15_2", "road_3_15_1", "road_3_16_2", "road_2_16_3", "road_2_15_3", "road_2_14_3", "road_2_13_3", "road_2_12_3", "road_2_11_3", "road_2_10_3", "road_2_9_3", "road_2_8_3", "road_2_7_0", "road_3_7_0"], "interval": 1.0, "startTime": 1320, "endTime": 1320},
{"vehicle": {"length": 5.0, "width": 2.0, "maxPosAcc": 2.0, "maxNegAcc": 4.5, "usualPosAcc": 2.0, "usualNegAcc": 4.5, "minGap": 2.5, "maxSpeed": 11.111, "headwayTime": 2}, "route": ["road_4_8_2", "road_3_8_1", "road_3_9_1", "road_3_10_1", "road_3_11_1", "road_3_12_1", "road_3_13_1", "road_3_14_2", "road_2_14_2", "road_1_14_1", "road_1_15_2"], "interval": 1.0, "startTime": 1320, "endTime": 1320},
[truncated: 675,027 more chars]
