# Supplementary material
Source: ML conference proceedings conference paper supplement (https://proceedings.neurips.cc/paper_files/paper/2021/hash/654516d1b4df6917094de807156adc14-Abstract.html)
Supplement: Supplementary file 1 [file 654516d1b4df6917094de807156adc14-Supplemental.zip › neurips-supplementary/codes/data/NewYork/16_3/roadnet_16_3.json]

{
  "intersections": [
    {
      "id": "intersection_0_1",
      "point": {
        "x": -350,
        "y": 0
      },
      "width": 0,
      "roads": [
        "road_1_1_2",
        "road_0_1_0"
      ],
      "roadLinks": [],
      "trafficLight": {
        "roadLinkIndices": [],
        "lightphases": [
          {
            "time": 5,
            "availableRoadLinks": []
          },
          {
            "time": 30,
            "availableRoadLinks": []
          },
          {
            "time": 30,
            "availableRoadLinks": []
          },
          {
            "time": 30,
            "availableRoadLinks": []
          },
          {
            "time": 30,
            "availableRoadLinks": []
          },
          {
            "time": 30,
            "availableRoadLinks": []
          },
          {
            "time": 30,
            "availableRoadLinks": []
          },
          {
            "time": 30,
            "availableRoadLinks": []
          },
          {
            "time": 30,
            "availableRoadLinks": []
          }
        ]
      },
      "virtual": true
    },
    {
      "id": "intersection_0_2",
      "point": {
        "x": -350,
        "y": 100
      },
      "width": 0,
      "roads": [
        "road_1_2_2",
        "road_0_2_0"
      ],
      "roadLinks": [],
      "trafficLight": {
        "roadLinkIndices": [],
        "lightphases": [
          {
            "time": 5,
            "availableRoadLinks": []
          },
          {
            "time": 30,
            "availableRoadLinks": []
          },
          {
            "time": 30,
            "availableRoadLinks": []
          },
          {
            "time": 30,
            "availableRoadLinks": []
          },
          {
            "time": 30,
            "availableRoadLinks": []
          },
          {
            "time": 30,
            "availableRoadLinks": []
          },
          {
            "time": 30,
            "availableRoadLinks": []
          },
          {
            "time": 30,
            "availableRoadLinks": []
          },
          {
            "time": 30,
            "availableRoadLinks": []
          }
        ]
      },
      "virtual": true
    },
    {
      "id": "intersection_0_3",
      "point": {
        "x": -350,
        "y": 200
      },
      "width": 0,
      "roads": [
        "road_1_3_2",
        "road_0_3_0"
      ],
      "roadLinks": [],
      "trafficLight": {
        "roadLinkIndices": [],
        "lightphases": [
          {
            "time": 5,
            "availableRoadLinks": []
          },
          {
            "time": 30,
            "availableRoadLinks": []
          },
          {
            "time": 30,
            "availableRoadLinks": []
          },
          {
            "time": 30,
            "availableRoadLinks": []
          },
          {
            "time": 30,
            "availableRoadLinks": []
          },
          {
            "time": 30,
            "availableRoadLinks": []
          },
          {
            "time": 30,
            "availableRoadLinks": []
          },
          {
            "time": 30,
            "availableRoadLinks": []
          },
          {
            "time": 30,
            "availableRoadLinks": []
          }
        ]
      },
      "virtual": true
    },
    {
      "id": "intersection_0_4",
      "point": {
        "x": -350,
        "y": 300
      },
      "width": 0,
      "roads": [
        "road_1_4_2",
        "road_0_4_0"
      ],
      "roadLinks": [],
      "trafficLight": {
        "roadLinkIndices": [],
        "lightphases": [
          {
            "time": 5,
            "availableRoadLinks": []
          },
          {
            "time": 30,
            "availableRoadLinks": []
          },
          {
            "time": 30,
            "availableRoadLinks": []
          },
          {
            "time": 30,
            "availableRoadLinks": []
          },
          {
            "time": 30,
            "availableRoadLinks": []
          },
          {
            "time": 30,
            "availableRoadLinks": []
          },
          {
            "time": 30,
            "availableRoadLinks": []
          },
          {
            "time": 30,
            "availableRoadLinks": []
          },
          {
            "time": 30,
            "availableRoadLinks": []
          }
        ]
      },
      "virtual": true
    },
    {
      "id": "intersection_0_5",
      "point": {
        "x": -350,
        "y": 400
      },
      "width": 0,
      "roads": [
        "road_1_5_2",
        "road_0_5_0"
      ],
      "roadLinks": [],
      "trafficLight": {
        "roadLinkIndices": [],
        "lightphases": [
          {
            "time": 5,
            "availableRoadLinks": []
          },
          {
            "time": 30,
            "availableRoadLinks": []
          },
          {
            "time": 30,
            "availableRoadLinks": []
          },
          {
            "time": 30,
            "availableRoadLinks": []
          },
          {
            "time": 30,
            "availableRoadLinks": []
          },
          {
            "time": 30,
            "availableRoadLinks": []
          },
          {
            "time": 30,
            "availableRoadLinks": []
          },
          {
            "time": 30,
            "availableRoadLinks": []
          },
          {
            "time": 30,
            "availableRoadLinks": []
          }
        ]
      },
      "virtual": true
    },
    {
      "id": "intersection_0_6",
      "point": {
        "x": -350,
        "y": 500
      },
      "width": 0,
      "roads": [
        "road_1_6_2",
        "road_0_6_0"
      ],
      "roadLinks": [],
      "trafficLight": {
        "roadLinkIndices": [],
        "lightphases": [
          {
            "time": 5,
            "availableRoadLinks": []
          },
          {
            "time": 30,
            "availableRoadLinks": []
          },
          {
            "time": 30,
            "availableRoadLinks": []
          },
          {
            "time": 30,
            "availableRoadLinks": []
          },
          {
            "time": 30,
            "availableRoadLinks": []
          },
          {
            "time": 30,
            "availableRoadLinks": []
          },
          {
            "time": 30,
            "availableRoadLinks": []
          },
          {
            "time": 30,
            "availableRoadLinks": []
          },
          {
            "time": 30,
            "availableRoadLinks": []
          }
        ]
      },
      "virtual": true
    },
    {
      "id": "intersection_0_7",
      "point": {
        "x": -350,
        "y": 600
      },
      "width": 0,
      "roads": [
        "road_1_7_2",
        "road_0_7_0"
      ],
      "roadLinks": [],
      "trafficLight": {
        "roadLinkIndices": [],
        "lightphases": [
          {
            "time": 5,
            "availableRoadLinks": []
          },
          {
            "time": 30,
            "availableRoadLinks": []
          },
          {
            "time": 30,
            "availableRoadLinks": []
          },
          {
            "time": 30,
            "availableRoadLinks": []
          },
          {
            "time": 30,
            "availableRoadLinks": []
          },
          {
            "time": 30,
            "availableRoadLinks": []
          },
          {
            "time": 30,
            "availableRoadLinks": []
          },
          {
            "time": 30,
            "availableRoadLinks": []
          },
          {
            "time": 30,
            "availableRoadLinks": []
          }
        ]
      },
      "virtual": true
    },
    {
      "id": "intersection_0_8",
      "point": {
        "x": -350,
        "y": 700
      },
      "width": 0,
      "roads": [
        "road_1_8_2",
        "road_0_8_0"
      ],
      "roadLinks": [],
      "trafficLight": {
        "roadLinkIndices": [],
        "lightphases": [
          {
            "time": 5,
            "availableRoadLinks": []
          },
          {
            "time": 30,
            "availableRoadLinks": []
          },
          {
            "time": 30,
            "availableRoadLinks": []
          },
          {
            "time": 30,
            "availableRoadLinks": []
          },
          {
            "time": 30,
            "availableRoadLinks": []
          },
          {
            "time": 30,
            "availableRoadLinks": []
          },
          {
            "time": 30,
            "availableRoadLinks": []
          },
          {
            "time": 30,
            "availableRoadLinks": []
          },
          {
            "time": 30,
            "availableRoadLinks": []
          }
        ]
      },
      "virtual": true
    },
    {
      "id": "intersection_0_9",
      "point": {
        "x": -350,
        "y": 800
      },
      "width": 0,
      "roads": [
        "road_1_9_2",
        "road_0_9_0"
      ],
      "roadLinks": [],
      "trafficLight": {
        "roadLinkIndices": [],
        "lightphases": [
          {
            "time": 5,
            "availableRoadLinks": []
          },
          {
            "time": 30,
            "availableRoadLinks": []
          },
          {
            "time": 30,
            "availableRoadLinks": []
          },
          {
            "time": 30,
            "availableRoadLinks": []
          },
          {
            "time": 30,
            "availableRoadLinks": []
          },
          {
            "time": 30,
            "availableRoadLinks": []
          },
          {
            "time": 30,
            "availableRoadLinks": []
          },
          {
            "time": 30,
            "availableRoadLinks": []
          },
          {
            "time": 30,
            "availableRoadLinks": []
          }
        ]
      },
      "virtual": true
    },
    {
      "id": "intersection_0_10",
      "point": {
        "x": -350,
        "y": 900
      },
      "width": 0,
      "roads": [
        "road_1_10_2",
        "road_0_10_0"
      ],
      "roadLinks": [],
      "trafficLight": {
        "roadLinkIndices": [],
        "lightphases": [
          {
            "time": 5,
            "availableRoadLinks": []
          },
          {
            "time": 30,
            "availableRoadLinks": []
          },
          {
            "time": 30,
            "availableRoadLinks": []
          },
          {
            "time": 30,
            "availableRoadLinks": []
          },
          {
            "time": 30,
            "availableRoadLinks": []
          },
          {
            "time": 30,
            "availableRoadLinks": []
          },
          {
            "time": 30,
            "availableRoadLinks": []
          },
          {
            "time": 30,
            "availableRoadLinks": []
          },
          {
            "time": 30,
            "availableRoadLinks": []
          }
        ]
      },
      "virtual": true
    },
    {
      "id": "intersection_0_11",
      "point": {
        "x": -350,
        "y": 1000
      },
      "width": 0,
      "roads": [
        "road_1_11_2",
        "road_0_11_0"
      ],
      "roadLinks": [],
      "trafficLight": {
        "roadLinkIndices": [],
        "lightphases": [
          {
            "time": 5,
            "availableRoadLinks": []
          },
          {
            "time": 30,
            "availableRoadLinks": []
          },
          {
            "time": 30,
            "availableRoadLinks": []
          },
          {
            "time": 30,
            "availableRoadLinks": []
          },
          {
            "time": 30,
            "availableRoadLinks": []
          },
          {
            "time": 30,
            "availableRoadLinks": []
          },
          {
            "time": 30,
            "availableRoadLinks": []
          },
          {
            "time": 30,
            "availableRoadLinks": []
          },
          {
            "time": 30,
            "availableRoadLinks": []
          }
        ]
      },
      "virtual": true
    },
    {
      "id": "intersection_0_12",
      "point": {
        "x": -350,
        "y": 1100
      },
      "width": 0,
      "roads": [
        "road_1_12_2",
        "road_0_12_0"
      ],
      "roadLinks": [],
      "trafficLight": {
        "roadLinkIndices": [],
        "lightphases": [
          {
            "time": 5,
            "availableRoadLinks": []
          },
          {
            "time": 30,
            "availableRoadLinks": []
          },
          {
            "time": 30,
            "availableRoadLinks": []
          },
          {
            "time": 30,
            "availableRoadLinks": []
          },
          {
            "time": 30,
            "availableRoadLinks": []
          },
          {
            "time": 30,
            "availableRoadLinks": []
          },
          {
            "time": 30,
            "availableRoadLinks": []
          },
          {
            "time": 30,
            "availableRoadLinks": []
          },
          {
            "time": 30,
            "availableRoadLinks": []
          }
        ]
      },
      "virtual": true
    },
    {
      "id": "intersection_0_13",
      "point": {
        "x": -350,
        "y": 1200
      },
      "width": 0,
      "roads": [
        "road_1_13_2",
        "road_0_13_0"
      ],
      "roadLinks": [],
      "trafficLight": {
        "roadLinkIndices": [],
        "lightphases": [
          {
            "time": 5,
            "availableRoadLinks": []
          },
          {
            "time": 30,
            "availableRoadLinks": []
          },
          {
            "time": 30,
            "availableRoadLinks": []
          },
          {
            "time": 30,
            "availableRoadLinks": []
          },
          {
            "time": 30,
            "availableRoadLinks": []
          },
          {
            "time": 30,
            "availableRoadLinks": []
          },
          {
            "time": 30,
            "availableRoadLinks": []
          },
          {
            "time": 30,
            "availableRoadLinks": []
          },
          {
            "time": 30,
            "availableRoadLinks": []
          }
        ]
      },
      "virtual": true
    },
    {
      "id": "intersection_0_14",
      "point": {
        "x": -350,
        "y": 1300
      },
      "width": 0,
      "roads": [
        "road_1_14_2",
        "road_0_14_0"
      ],
      "roadLinks": [],
      "trafficLight": {
        "roadLinkIndices": [],
        "lightphases": [
          {
            "time": 5,
            "availableRoadLinks": []
          },
          {
            "time": 30,
            "availableRoadLinks": []
          },
          {
            "time": 30,
            "availableRoadLinks": []
          },
          {
            "time": 30,
            "availableRoadLinks": []
          },
          {
            "time": 30,
            "availableRoadLinks": []
          },
          {
            "time": 30,
            "availableRoadLinks": []
          },
          {
            "time": 30,
            "availableRoadLinks": []
          },
          {
            "time": 30,
            "availableRoadLinks": []
          },
          {
            "time": 30,
            "availableRoadLinks": []
          }
        ]
      },
      "virtual": true
    },
    {
      "id": "intersection_0_15",
      "point": {
        "x": -350,
        "y": 1400
      },
      "width": 0,
      "roads": [
        "road_1_15_2",
        "road_0_15_0"
      ],
      "roadLinks": [],
      "trafficLight": {
        "roadLinkIndices": [],
        "lightphases": [
          {
            "time": 5,
            "availableRoadLinks": []
          },
          {
            "time": 30,
            "availableRoadLinks": []
          },
          {
            "time": 30,
            "availableRoadLinks": []
          },
          {
            "time": 30,
            "availableRoadLinks": []
          },
          {
            "time": 30,
            "availableRoadLinks": []
          },
          {
            "time": 30,
            "availableRoadLinks": []
          },
          {
            "time": 30,
            "availableRoadLinks": []
          },
          {
            "time": 30,
            "availableRoadLinks": []
          },
          {
            "time": 30,
            "availableRoadLinks": []
          }
        ]
      },
      "virtual": true
    },
    {
      "id": "intersection_0_16",
      "point": {
        "x": -350,
        "y": 1500
      },
      "width": 0,
      "roads": [
        "road_1_16_2",
        "road_0_16_0"
      ],
      "roadLinks": [],
      "trafficLight": {
        "roadLinkIndices": [],
        "lightphases": [
          {
            "time": 5,
            "availableRoadLinks": []
          },
          {
            "time": 30,
            "availableRoadLinks": []
          },
          {
            "time": 30,
            "availableRoadLinks": []
          },
          {
            "time": 30,
            "availableRoadLinks": []
          },
          {
            "time": 30,
            "availableRoadLinks": []
          },
          {
            "time": 30,
            "availableRoadLinks": []
          },
          {
            "time": 30,
            "availableRoadLinks": []
          },
          {
            "time": 30,
            "availableRoadLinks": []
          },
          {
            "time": 30,
            "availableRoadLinks": []
          }
        ]
      },
      "virtual": true
    },
    {
      "id": "intersection_1_0",
      "point": {
        "x": 0,
        "y": -100
      },
      "width": 0,
      "roads": [
        "road_1_1_3",
        "road_1_0_1"
      ],
      "roadLinks": [],
      "trafficLight": {
        "roadLinkIndices": [],
        "lightphases": [
          {
            "time": 5,
            "availableRoadLinks": []
          },
          {
            "time": 30,
            "availableRoadLinks": []
          },
          {
            "time": 30,
            "availableRoadLinks": []
          },
          {
            "time": 30,
            "availableRoadLinks": []
          },
          {
            "time": 30,
            "availableRoadLinks": []
          },
          {
            "time": 30,
            "availableRoadLinks": []
          },
          {
            "time": 30,
            "availableRoadLinks": []
          },
          {
            "time": 30,
            "availableRoadLinks": []
          },
          {
            "time": 30,
            "availableRoadLinks": []
          }
        ]
      },
      "virtual": true
    },
    {
      "id": "intersection_1_1",
      "point": {
        "x": 0,
        "y": 0
      },
      "width": 11,
      "roads": [
        "road_0_1_0",
        "road_1_0_1",
        "road_2_1_2",
        "road_1_2_3",
        "road_1_1_0",
        "road_1_1_1",
        "road_1_1_2",
        "road_1_1_3"
      ],
      "roadLinks": [
        {
          "type": "go_straight",
          "startRoad": "road_0_1_0",
          "endRoad": "road_1_1_0",
          "direction": 0,
          "laneLinks": [
            {
              "startLaneIndex": 1,
              "endLaneIndex": 0,
              "points": [
                {
                  "x": -11.0,
                  "y": -6.0
                },
                {
                  "x": -9.592,
                  "y": -5.888
                },
                {
                  "x": -7.656,
                  "y": -5.584
                },
                {
                  "x": -5.324,
                  "y": -5.136
                },
                {
                  "x": -2.7279999999999998,
                  "y": -4.592
                },
                {
                  "x": 0.0,
                  "y": -4.0
                },
                {
                  "x": 2.7279999999999998,
                  "y": -3.408
                },
                {
                  "x": 5.323999999999999,
                  "y": -2.864
                },
                {
                  "x": 7.655999999999999,
                  "y": -2.415999999999999
                },
                {
                  "x": 9.592,
                  "y": -2.112
                },
                {
                  "x": 11.0,
                  "y": -2.0
                }
              ]
            },
            {
              "startLaneIndex": 1,
              "endLaneIndex": 1,
              "points": [
                {
                  "x": -11.0,
                  "y": -6.0
                },
                {
                  "x": -9.592,
                  "y": -6.0
                },
                {
                  "x": -7.656,
                  "y": -6.0
                },
                {
                  "x": -5.324,
                  "y": -6.0
                },
                {
                  "x": -2.7279999999999998,
                  "y": -6.0
                },
                {
                  "x": 0.0,
                  "y": -6.0
                },
                {
                  "x": 2.7279999999999998,
                  "y": -6.0
                },
                {
                  "x": 5.323999999999999,
                  "y": -6.0
                },
                {
                  "x": 7.655999999999999,
                  "y": -5.999999999999999
                },
                {
                  "x": 9.592,
                  "y": -6.0
                },
                {
                  "x": 11.0,
                  "y": -6.0
                }
              ]
            },
            {
              "startLaneIndex": 1,
              "endLaneIndex": 2,
              "points": [
                {
                  "x": -11.0,
                  "y": -6.0
                },
                {
                  "x": -9.592,
                  "y": -6.112
                },
                {
                  "x": -7.656,
                  "y": -6.416
                },
                {
                  "x": -5.324,
                  "y": -6.864
                },
                {
                  "x": -2.7279999999999998,
                  "y": -7.408
                },
                {
                  "x": 0.0,
                  "y": -8.0
                },
                {
                  "x": 2.7279999999999998,
                  "y": -8.592
                },
                {
                  "x": 5.323999999999999,
                  "y": -9.136
                },
                {
                  "x": 7.655999999999999,
                  "y": -9.584
                },
                {
                  "x": 9.592,
                  "y": -9.888
                },
                {
                  "x": 11.0,
                  "y": -10.0
                }
              ]
            }
          ]
        },
        {
          "type": "turn_left",
          "startRoad": "road_0_1_0",
          "endRoad": "road_1_1_1",
          "direction": 0,
          "laneLinks": [
            {
              "startLaneIndex": 0,
              "endLaneIndex": 0,
              "points": [
                {
                  "x": -11.0,
                  "y": -2.0
                },
                {
                  "x": -9.745,
                  "y": -1.7349999999999999
                },
                {
                  "x": -8.24,
                  "y": -1.0
                },
                {
                  "x": -6.575,
                  "y": 0.115
                },
                {
                  "x": -4.84,
                  "y": 1.52
                },
                {
                  "x": -3.125,
                  "y": 3.125
                },
                {
                  "x": -1.52,
                  "y": 4.84
                },
                {
                  "x": -0.115000000000001,
                  "y": 6.575
                },
                {
                  "x": 0.999999999999999,
                  "y": 8.24
                },
                {
                  "x": 1.735,
                  "y": 9.745
                },
                {
                  "x": 2.0,
                  "y": 11.0
                }
              ]
            },
            {
              "startLaneIndex": 0,
              "endLaneIndex": 1,
              "points": [
                {
                  "x": -11.0,
                  "y": -2.0
                },
                {
                  "x": -9.633,
                  "y": -1.7349999999999999
                },
                {
                  "x": -7.824,
                  "y": -1.0
                },
                {
                  "x": -5.711,
                  "y": 0.115
                },
                {
                  "x": -3.432,
                  "y": 1.52
                },
                {
                  "x": -1.125,
                  "y": 3.125
                },
                {
                  "x": 1.072,
                  "y": 4.84
                },
                {
                  "x": 3.020999999999999,
                  "y": 6.575
                },
                {
                  "x": 4.583999999999999,
                  "y": 8.24
                },
                {
                  "x": 5.623,
                  "y": 9.745
                },
                {
                  "x": 6.0,
                  "y": 11.0
                }
              ]
            },
            {
              "startLaneIndex": 0,
              "endLaneIndex": 2,
              "points": [
                {
                  "x": -11.0,
                  "y": -2.0
                },
                {
                  "x": -9.521,
                  "y": -1.7349999999999999
                },
                {
                  "x": -7.408,
                  "y": -1.0
                },
                {
                  "x": -4.8469999999999995,
                  "y": 0.115
                },
                {
                  "x": -2.024,
                  "y": 1.52
                },
                {
                  "x": 0.875,
                  "y": 3.125
                },
                {
                  "x": 3.664,
                  "y": 4.84
                },
                {
                  "x": 6.156999999999999,
                  "y": 6.575
                },
                {
                  "x": 8.168,
                  "y": 8.24
                },
                {
                  "x": 9.511,
                  "y": 9.745
                },
                {
                  "x": 10.0,
                  "y": 11.0
                }
              ]
            }
          ]
        },
        {
          "type": "turn_right",
          "startRoad": "road_0_1_0",
          "endRoad": "road_1_1_3",
          "direction": 0,
          "laneLinks": [
            {
              "startLaneIndex": 2,
              "endLaneIndex": 0,
              "points": [
                {
                  "x": -11.0,
                  "y": -10.0
                },
                {
                  "x": -9.857,
                  "y": -9.929
                },
                {
                  "x": -8.656,
                  "y": -9.752
                },
                {
                  "x": -7.439,
                  "y": -9.523
                },
                {
                  "x": -6.248,
                  "y": -9.296
                },
                {
                  "x": -5.125,
                  "y": -9.125
                },
                {
                  "x": -4.112,
                  "y": -9.064
                },
                {
                  "x": -3.251000000000001,
                  "y": -9.167
                },
                {
                  "x": -2.584000000000001,
                  "y": -9.488
                },
                {
                  "x": -2.153,
                  "y": -10.081
                },
                {
                  "x": -2.0,
                  "y": -11.0
                }
              ]
            },
            {
              "startLaneIndex": 2,
              "endLaneIndex": 1,
              "points": [
                {
                  "x": -11.0,
                  "y": -10.0
                },
                {
                  "x": -9.969,
                  "y": -9.929
                },
                {
                  "x": -9.072,
                  "y": -9.752
                },
                {
                  "x": -8.303,
                  "y": -9.523
                },
                {
                  "x": -7.656,
                  "y": -9.296
                },
                {
                  "x": -7.125,
                  "y": -9.125
                },
                {
                  "x": -6.704,
                  "y": -9.064
                },
                {
                  "x": -6.387000000000001,
                  "y": -9.167
                },
                {
                  "x": -6.168000000000001,
                  "y": -9.488
                },
                {
                  "x": -6.0409999999999995,
                  "y": -10.081
                },
                {
                  "x": -6.0,
                  "y": -11.0
                }
              ]
            },
            {
              "startLaneIndex": 2,
              "endLaneIndex": 2,
              "points": [
                {
                  "x": -11.0,
                  "y": -10.0
                },
                {
                  "x": -10.081,
                  "y": -9.929
                },
                {
                  "x": -9.488,
                  "y": -9.752
                },
                {
                  "x": -9.167,
                  "y": -9.523
                },
                {
                  "x": -9.064,
                  "y": -9.296
                },
                {
                  "x": -9.125,
                  "y": -9.125
                },
                {
                  "x": -9.296,
                  "y": -9.064
                },
                {
                  "x": -9.523000000000001,
                  "y": -9.167
                },
                {
                  "x": -9.752,
                  "y": -9.488
                },
                {
                  "x": -9.929,
                  "y": -10.081
                },
                {
                  "x": -10.0,
                  "y": -11.0
                }
              ]
            }
          ]
        },
        {
          "type": "turn_right",
          "startRoad": "road_1_0_1",
          "endRoad": "road_1_1_0",
          "direction": 1,
          "laneLinks": [
            {
              "startLaneIndex": 2,
              "endLaneIndex": 0,
              "points": [
                {
                  "x": 10.0,
                  "y": -11.0
                },
                {
                  "x": 9.929,
                  "y": -9.857
                },
                {
                  "x": 9.752,
                  "y": -8.656
                },
                {
                  "x": 9.523,
                  "y": -7.439
                },
                {
                  "x": 9.296,
                  "y": -6.248
                },
                {
                  "x": 9.125,
                  "y": -5.125
                },
                {
                  "x": 9.064,
                  "y": -4.112
                },
                {
                  "x": 9.167,
                  "y": -3.251000000000001
                },
                {
                  "x": 9.488,
                  "y": -2.584000000000001
                },
                {
                  "x": 10.081,
                  "y": -2.153
                },
                {
                  "x": 11.0,
                  "y": -2.0
                }
              ]
            },
            {
              "startLaneIndex": 2,
              "endLaneIndex": 1,
              "points": [
                {
                  "x": 10.0,
                  "y": -11.0
                },
                {
                  "x": 9.929,
                  "y": -9.969
                },
                {
                  "x": 9.752,
                  "y": -9.072
                },
                {
                  "x": 9.523,
                  "y": -8.303
                },
                {
                  "x": 9.296,
                  "y": -7.656
                },
                {
                  "x": 9.125,
                  "y": -7.125
                },
                {
                  "x": 9.064,
                  "y": -6.704
                },
                {
                  "x": 9.167,
                  "y": -6.387000000000001
                },
                {
                  "x": 9.488,
                  "y": -6.168000000000001
                },
                {
                  "x": 10.081,
                  "y": -6.0409999999999995
                },
                {
                  "x": 11.0,
                  "y": -6.0
                }
              ]
            },
            {
              "startLaneIndex": 2,
              "endLaneIndex": 2,
              "points": [
                {
                  "x": 10.0,
                  "y": -11.0
                },
                {
                  "x": 9.929,
                  "y": -10.081
                },
                {
                  "x": 9.752,
                  "y": -9.488
                },
                {
                  "x": 9.523,
                  "y": -9.167
                },
                {
                  "x": 9.296,
                  "y": -9.064
                },
                {
                  "x": 9.125,
                  "y": -9.125
                },
                {
                  "x": 9.064,
                  "y": -9.296
                },
                {
                  "x": 9.167,
                  "y": -9.523000000000001
                },
                {
                  "x": 9.488,
                  "y": -9.752
                },
                {
                  "x": 10.081,
                  "y": -9.929
                },
                {
                  "x": 11.0,
                  "y": -10.0
                }
              ]
            }
          ]
        },
        {
          "type": "go_straight",
          "startRoad": "road_1_0_1",
          "endRoad": "road_1_1_1",
          "direction": 1,
          "laneLinks": [
            {
              "startLaneIndex": 1,
              "endLaneIndex": 0,
              "points": [
                {
                  "x": 6.0,
                  "y": -11.0
                },
                {
                  "x": 5.888,
                  "y": -9.592
                },
                {
                  "x": 5.584,
                  "y": -7.656
                },
                {
                  "x": 5.136,
                  "y": -5.324
                },
                {
                  "x": 4.592,
                  "y": -2.7279999999999998
                },
                {
                  "x": 4.0,
                  "y": 0.0
                },
                {
                  "x": 3.408,
                  "y": 2.7279999999999998
                },
                {
                  "x": 2.864,
                  "y": 5.323999999999999
                },
                {
                  "x": 2.415999999999999,
                  "y": 7.655999999999999
                },
                {
                  "x": 2.112,
                  "y": 9.592
                },
                {
                  "x": 2.0,
                  "y": 11.0
                }
              ]
            },
            {
              "startLaneIndex": 1,
              "endLaneIndex": 1,
              "points": [
                {
                  "x": 6.0,
                  "y": -11.0
                },
                {
                  "x": 6.0,
                  "y": -9.592
                },
                {
                  "x": 6.0,
                  "y": -7.656
                },
                {
                  "x": 6.0,
                  "y": -5.324
                },
                {
                  "x": 6.0,
                  "y": -2.7279999999999998
                },
                {
                  "x": 6.0,
                  "y": 0.0
                },
                {
                  "x": 6.0,
                  "y": 2.7279999999999998
                },
                {
                  "x": 6.0,
                  "y": 5.323999999999999
                },
                {
                  "x": 5.999999999999999,
                  "y": 7.655999999999999
                },
                {
                  "x": 6.0,
                  "y": 9.592
                },
                {
                  "x": 6.0,
                  "y": 11.0
                }
              ]
            },
            {
              "startLaneIndex": 1,
              "endLaneIndex": 2,
              "points": [
                {
                  "x": 6.0,
                  "y": -11.0
                },
                {
                  "x": 6.112,
                  "y": -9.592
                },
                {
                  "x": 6.416,
                  "y": -7.656
                },
                {
                  "x": 6.864,
                  "y": -5.324
                },
                {
                  "x": 7.408,
                  "y": -2.7279999999999998
                },
                {
                  "x": 8.0,
                  "y": 0.0
                },
                {
                  "x": 8.592,
                  "y": 2.7279999999999998
                },
                {
                  "x": 9.136,
                  "y": 5.323999999999999
                },
                {
                  "x": 9.584,
                  "y": 7.655999999999999
                },
                {
                  "x": 9.888,
                  "y": 9.592
                },
                {
                  "x": 10.0,
                  "y": 11.0
                }
              ]
            }
          ]
        },
        {
          "type": "turn_left",
          "startRoad": "road_1_0_1",
          "endRoad": "road_1_1_2",
          "direction": 1,
          "laneLinks": [
            {
              "startLaneIndex": 0,
              "endLaneIndex": 0,
              "points": [
                {
                  "x": 2.0,
                  "y": -11.0
                },
                {
                  "x": 1.7349999999999999,
                  "y": -9.745
                },
                {
                  "x": 1.0,
                  "y": -8.24
                },
                {
                  "x": -0.115,
                  "y": -6.575
                },
                {
                  "x": -1.52,
                  "y": -4.84
                },
                {
                  "x": -3.125,
                  "y": -3.125
                },
                {
                  "x": -4.84,
                  "y": -1.52
                },
                {
                  "x": -6.575,
                  "y": -0.115000000000001
                },
                {
                  "x": -8.24,
                  "y": 0.999999999999999
                },
                {
                  "x": -9.745,
                  "y": 1.735
                },
                {
                  "x": -11.0,
                  "y": 2.0
                }
              ]
            },
            {
              "startLaneIndex": 0,
              "endLaneIndex": 1,
              "points": [
                {
                  "x": 2.0,
                  "y": -11.0
                },
                {
                  "x": 1.7349999999999999,
                  "y": -9.633
                },
                {
                  "x": 1.0,
                  "y": -7.824
                },
                {
                  "x": -0.115,
                  "y": -5.711
                },
                {
                  "x": -1.52,
                  "y": -3.432
                },
                {
                  "x": -3.125,
                  "y": -1.125
                },
                {
                  "x": -4.84,
                  "y": 1.072
                },
                {
                  "x": -6.575,
                  "y": 3.020999999999999
                },
                {
                  "x": -8.24,
                  "y": 4.583999999999999
                },
                {
                  "x": -9.745,
                  "y": 5.623
                },
                {
                  "x": -11.0,
                  "y": 6.0
                }
              ]
            },
            {
              "startLaneIndex": 0,
              "endLaneIndex": 2,
              "points": [
                {
                  "x": 2.0,
                  "y": -11.0
                },
                {
                  "x": 1.7349999999999999,
                  "y": -9.521
                },
                {
                  "x": 1.0,
                  "y": -7.408
                },
                {
                  "x": -0.115,
                  "y": -4.8469999999999995
                },
                {
                  "x": -1.52,
                  "y": -2.024
                },
                {
                  "x": -3.125,
                  "y": 0.875
                },
                {
                  "x": -4.84,
                  "y": 3.664
                },
                {
                  "x": -6.575,
                  "y": 6.156999999999999
                },
                {
                  "x": -8.24,
                  "y": 8.168
                },
                {
                  "x": -9.745,
                  "y": 9.511
                },
                {
                  "x": -11.0,
                  "y": 10.0
                }
              ]
            }
          ]
        },
        {
          "type": "turn_right",
          "startRoad": "road_2_1_2",
          "endRoad": "road_1_1_1",
          "direction": 2,
          "laneLinks": [
            {
              "startLaneIndex": 2,
              "endLaneIndex": 0,
              "points": [
                {
                  "x": 11.0,
                  "y": 10.0
                },
                {
                  "x": 9.857,
                  "y": 9.929
                },
                {
                  "x": 8.656,
                  "y": 9.752
                },
                {
                  "x": 7.439,
                  "y": 9.523
                },
                {
                  "x": 6.248,
                  "y": 9.296
                },
                {
                  "x": 5.125,
                  "y": 9.125
                },
                {
                  "x": 4.112,
                  "y": 9.064
                },
                {
                  "x": 3.251000000000001,
                  "y": 9.167
                },
                {
                  "x": 2.584000000000001,
                  "y": 9.488
                },
                {
                  "x": 2.153,
                  "y": 10.081
                },
                {
                  "x": 2.0,
                  "y": 11.0
                }
              ]
            },
            {
              "startLaneIndex": 2,
              "endLaneIndex": 1,
              "points": [
                {
                  "x": 11.0,
                  "y": 10.0
                },
                {
                  "x": 9.969,
                  "y": 9.929
                },
                {
                  "x": 9.072,
                  "y": 9.752
                },
                {
                  "x": 8.303,
                  "y": 9.523
                },
                {
                  "x": 7.656,
                  "y": 9.296
                },
                {
                  "x": 7.125,
                  "y": 9.125
                },
                {
                  "x": 6.704,
                  "y": 9.064
                },
                {
                  "x": 6.387000000000001,
                  "y": 9.167
                },
                {
                  "x": 6.168000000000001,
                  "y": 9.488
                },
                {
                  "x": 6.0409999999999995,
                  "y": 10.081
                },
                {
                  "x": 6.0,
                  "y": 11.0
                }
              ]
            },
            {
              "startLaneIndex": 2,
              "endLaneIndex": 2,
              "points": [
                {
                  "x": 11.0,
                  "y": 10.0
                },
                {
                  "x": 10.081,
                  "y": 9.929
                },
                {
                  "x": 9.488,
                  "y": 9.752
                },
                {
                  "x": 9.167,
                  "y": 9.523
                },
                {
                  "x": 9.064,
                  "y": 9.296
                },
                {
                  "x": 9.125,
                  "y": 9.125
                },
                {
                  "x": 9.296,
                  "y": 9.064
                },
                {
                  "x": 9.523000000000001,
                  "y": 9.167
                },
                {
                  "x": 9.752,
                  "y": 9.488
                },
                {
                  "x": 9.929,
                  "y": 10.081
                },
                {
                  "x": 10.0,
                  "y": 11.0
                }
              ]
            }
          ]
        },
        {
          "type": "go_straight",
          "startRoad": "road_2_1_2",
          "endRoad": "road_1_1_2",
          "direction": 2,
          "laneLinks": [
            {
              "startLaneIndex": 1,
              "endLaneIndex": 0,
              "points": [
                {
                  "x": 11.0,
                  "y": 6.0
                },
                {
                  "x": 9.592,
                  "y": 5.888
                },
                {
                  "x": 7.656,
                  "y": 5.584
                },
                {
                  "x": 5.324,
                  "y": 5.136
                },
                {
                  "x": 2.7279999999999998,
                  "y": 4.592
                },
                {
                  "x": 0.0,
                  "y": 4.0
                },
                {
                  "x": -2.7279999999999998,
                  "y": 3.408
                },
                {
                  "x": -5.323999999999999,
                  "y": 2.864
                },
                {
                  "x": -7.655999999999999,
                  "y": 2.415999999999999
                },
                {
                  "x": -9.592,
                  "y": 2.112
                },
                {
                  "x": -11.0,
                  "y": 2.0
                }
              ]
            },
            {
              "startLaneIndex": 1,
              "endLaneIndex": 1,
              "points": [
                {
                  "x": 11.0,
                  "y": 6.0
                },
                {
                  "x": 9.592,
                  "y": 6.0
                },
                {
                  "x": 7.656,
                  "y": 6.0
                },
                {
                  "x": 5.324,
                  "y": 6.0
                },
                {
                  "x": 2.7279999999999998,
                  "y": 6.0
                },
                {
                  "x": 0.0,
                  "y": 6.0
                },
                {
                  "x": -2.7279999999999998,
                  "y": 6.0
                },
                {
                  "x": -5.323999999999999,
                  "y": 6.0
                },
                {
                  "x": -7.655999999999999,
                  "y": 5.999999999999999
                },
                {
                  "x": -9.592,
                  "y": 6.0
                },
                {
                  "x": -11.0,
                  "y": 6.0
                }
              ]
            },
            {
              "startLaneIndex": 1,
              "endLaneIndex": 2,
              "points": [
                {
                  "x": 11.0,
                  "y": 6.0
                },
                {
                  "x": 9.592,
                  "y": 6.112
                },
                {
                  "x": 7.656,
                  "y": 6.416
                },
                {
                  "x": 5.324,
                  "y": 6.864
                },
                {
                  "x": 2.7279999999999998,
                  "y": 7.408
                },
                {
                  "x": 0.0,
                  "y": 8.0
                },
                {
                  "x": -2.7279999999999998,
                  "y": 8.592
                },
                {
                  "x": -5.323999999999999,
                  "y": 9.136
                },
                {
                  "x": -7.655999999999999,
                  "y": 9.584
                },
                {
                  "x": -9.592,
                  "y": 9.888
                },
                {
                  "x": -11.0,
                  "y": 10.0
                }
              ]
            }
          ]
        },
        {
          "type": "turn_left",
          "startRoad": "road_2_1_2",
          "endRoad": "road_1_1_3",
          "direction": 2,
          "laneLinks": [
            {
              "startLaneIndex": 0,
              "endLaneIndex": 0,
              "points": [
                {
                  "x": 11.0,
                  "y": 2.0
                },
                {
                  "x": 9.745,
                  "y": 1.7349999999999999
                },
                {
                  "x": 8.24,
                  "y": 1.0
                },
                {
                  "x": 6.575,
                  "y": -0.115
                },
                {
                  "x": 4.84,
                  "y": -1.52
                },
                {
                  "x": 3.125,
                  "y": -3.125
                },
                {
                  "x": 1.52,
                  "y": -4.84
                },
                {
                  "x": 0.115000000000001,
                  "y": -6.575
                },
                {
                  "x": -0.999999999999999,
                  "y": -8.24
                },
                {
                  "x": -1.735,
                  "y": -9.745
                },
                {
                  "x": -2.0,
                  "y": -11.0
                }
              ]
            },
            {
              "startLaneIndex": 0,
              "endLaneIndex": 1,
              "points": [
                {
                  "x": 11.0,
                  "y": 2.0
                },
                {
                  "x": 9.633,
                  "y": 1.7349999999999999
                },
                {
                  "x": 7.824,
                  "y": 1.0
                },
                {
                  "x": 5.711,
                  "y": -0.115
                },
                {
                  "x": 3.432,
                  "y": -1.52
                },
                {
                  "x": 1.125,
                  "y": -3.125
                },
                {
                  "x": -1.072,
                  "y": -4.84
                },
                {
                  "x": -3.020999999999999,
                  "y": -6.575
                },
                {
                  "x": -4.583999999999999,
                  "y": -8.24
                },
                {
                  "x": -5.623,
                  "y": -9.745
                },
                {
                  "x": -6.0,
                  "y": -11.0
                }
              ]
            },
            {
              "startLaneIndex": 0,
              "endLaneIndex": 2,
              "points": [
                {
                  "x": 11.0,
                  "y": 2.0
                },
                {
                  "x": 9.521,
                  "y": 1.7349999999999999
                },
                {
                  "x": 7.408,
                  "y": 1.0
                },
                {
                  "x": 4.8469999999999995,
                  "y": -0.115
                },
                {
                  "x": 2.024,
                  "y": -1.52
                },
                {
                  "x": -0.875,
                  "y": -3.125
                },
                {
                  "x": -3.664,
                  "y": -4.84
                },
                {
                  "x": -6.156999999999999,
                  "y": -6.575
                },
                {
                  "x": -8.168,
                  "y": -8.24
                },
                {
                  "x": -9.511,
                  "y": -9.745
                },
                {
                  "x": -10.0,
                  "y": -11.0
                }
              ]
            }
          ]
        },
        {
          "type": "turn_left",
          "startRoad": "road_1_2_3",
          "endRoad": "road_1_1_0",
          "direction": 3,
          "laneLinks": [
            {
              "startLaneIndex": 0,
              "endLaneIndex": 0,
              "points": [
                {
                  "x": -2.0,
                  "y": 11.0
                },
                {
                  "x": -1.7349999999999999,
                  "y": 9.745
                },
                {
                  "x": -1.0,
                  "y": 8.24
                },
                {
                  "x": 0.115,
                  "y": 6.575
                },
                {
                  "x": 1.52,
                  "y": 4.84
                },
                {
                  "x": 3.125,
                  "y": 3.125
                },
                {
                  "x": 4.84,
                  "y": 1.52
                },
                {
                  "x": 6.575,
                  "y": 0.115000000000001
                },
                {
                  "x": 8.24,
                  "y": -0.999999999999999
                },
                {
                  "x": 9.745,
                  "y": -1.735
                },
                {
                  "x": 11.0,
                  "y": -2.0
                }
              ]
            },
            {
              "startLaneIndex": 0,
              "endLaneIndex": 1,
              "points": [
                {
                  "x": -2.0,
                  "y": 11.0
                },
                {
                  "x": -1.7349999999999999,
                  "y": 9.633
                },
                {
                  "x": -1.0,
                  "y": 7.824
                },
                {
                  "x": 0.115,
                  "y": 5.711
                },
                {
                  "x": 1.52,
                  "y": 3.432
                },
                {
                  "x": 3.125,
                  "y": 1.125
                },
                {
                  "x": 4.84,
                  "y": -1.072
                },
                {
                  "x": 6.575,
                  "y": -3.020999999999999
                },
                {
                  "x": 8.24,
                  "y": -4.583999999999999
                },
                {
                  "x": 9.745,
                  "y": -5.623
                },
                {
                  "x": 11.0,
                  "y": -6.0
                }
              ]
            },
            {
              "startLaneIndex": 0,
              "endLaneIndex": 2,
              "points": [
                {
                  "x": -2.0,
                  "y": 11.0
                },
                {
                  "x": -1.7349999999999999,
                  "y": 9.521
                },
                {
                  "x": -1.0,
                  "y": 7.408
                },
                {
                  "x": 0.115,
                  "y": 4.8469999999999995
                },
                {
                  "x": 1.52,
                  "y": 2.024
                },
                {
                  "x": 3.125,
                  "y": -0.875
                },
                {
                  "x": 4.84,
                  "y": -3.664
                },
                {
                  "x": 6.575,
                  "y": -6.156999999999999
                },
                {
                  "x": 8.24,
                  "y": -8.168
                },
                {
                  "x": 9.745,
                  "y": -9.511
                },
                {
                  "x": 11.0,
                  "y": -10.0
                }
              ]
            }
          ]
        },
        {
          "type": "turn_right",
          "startRoad": "road_1_2_3",
          "endRoad": "road_1_1_2",
          "direction": 3,
          "laneLinks": [
            {
              "startLaneIndex": 2,
              "endLaneIndex": 0,
              "points": [
                {
                  "x": -10.0,
                  "y": 11.0
                },
                {
                  "x": -9.929,
                  "y": 9.857
                },
                {
                  "x": -9.752,
                  "y": 8.656
                },
                {
                  "x": -9.523,
                  "y": 7.439
                },
                {
                  "x": -9.296,
                  "y": 6.248
                },
                {
                  "x": -9.125,
                  "y": 5.125
                },
                {
                  "x": -9.064,
                  "y": 4.112
                },
                {
                  "x": -9.167,
                  "y": 3.251000000000001
                },
                {
                  "x": -9.488,
                  "y": 2.584000000000001
                },
                {
                  "x": -10.081,
                  "y": 2.153
                },
                {
                  "x": -11.0,
                  "y": 2.0
                }
              ]
            },
            {
              "startLaneIndex": 2,
              "endLaneIndex": 1,
              "points": [
                {
                  "x": -10.0,
                  "y": 11.0
                },
                {
                  "x": -9.929,
                  "y": 9.969
                },
                {
                  "x": -9.752,
                  "y": 9.072
                },
                {
                  "x": -9.523,
                  "y": 8.303
                },
                {
                  "x": -9.296,
                  "y": 7.656
                },
                {
                  "x": -9.125,
                  "y": 7.125
                },
                {
                  "x": -9.064,
                  "y": 6.704
                },
                {
                  "x": -9.167,
                  "y": 6.387000000000001
                },
                {
                  "x": -9.488,
                  "y": 6.168000000000001
                },
                {
                  "x": -10.081,
                  "y": 6.0409999999999995
                },
                {
                  "x": -11.0,
                  "y": 6.0
                }
              ]
            },
            {
              "startLaneIndex": 2,
              "endLaneIndex": 2,
              "points": [
                {
                  "x": -10.0,
                  "y": 11.0
                },
                {
                  "x": -9.929,
                  "y": 10.081
                },
                {
                  "x": -9.752,
                  "y": 9.488
                },
                {
                  "x": -9.523,
                  "y": 9.167
                },
                {
                  "x": -9.296,
                  "y": 9.064
                },
                {
                  "x": -9.125,
                  "y": 9.125
                },
                {
                  "x": -9.064,
                  "y": 9.296
                },
                {
                  "x": -9.167,
                  "y": 9.523000000000001
                },
                {
                  "x": -9.488,
                  "y": 9.752
                },
                {
                  "x": -10.081,
                  "y": 9.929
                },
                {
                  "x": -11.0,
                  "y": 10.0
                }
              ]
            }
          ]
        },
        {
          "type": "go_straight",
          "startRoad": "road_1_2_3",
          "endRoad": "road_1_1_3",
          "direction": 3,
          "laneLinks": [
            {
              "startLaneIndex": 1,
              "endLaneIndex": 0,
              "points": [
                {
                  "x": -6.0,
                  "y": 11.0
                },
                {
                  "x": -5.888,
                  "y": 9.592
                },
                {
                  "x": -5.584,
                  "y": 7.656
                },
                {
                  "x": -5.136,
                  "y": 5.324
                },
                {
                  "x": -4.592,
                  "y": 2.7279999999999998
                },
                {
                  "x": -4.0,
                  "y": 0.0
                },
                {
                  "x": -3.408,
                  "y": -2.7279999999999998
                },
                {
                  "x": -2.864,
                  "y": -5.323999999999999
                },
                {
                  "x": -2.415999999999999,
                  "y": -7.655999999999999
                },
                {
                  "x": -2.112,
                  "y": -9.592
                },
                {
                  "x": -2.0,
                  "y": -11.0
                }
              ]
            },
            {
              "startLaneIndex": 1,
              "endLaneIndex": 1,
              "points": [
                {
                  "x": -6.0,
                  "y": 11.0
                },
                {
                  "x": -6.0,
                  "y": 9.592
                },
                {
                  "x": -6.0,
                  "y": 7.656
                },
                {
                  "x": -6.0,
                  "y": 5.324
                },
                {
                  "x": -6.0,
                  "y": 2.7279999999999998
                },
                {
                  "x": -6.0,
                  "y": 0.0
                },
                {
                  "x": -6.0,
                  "y": -2.7279999999999998
                },
                {
                  "x": -6.0,
                  "y": -5.323999999999999
                },
                {
                  "x": -5.999999999999999,
                  "y": -7.655999999999999
                },
                {
                  "x": -6.0,
                  "y": -9.592
                },
                {
                  "x": -6.0,
                  "y": -11.0
                }
              ]
            },
            {
              "startLaneIndex": 1,
              "endLaneIndex": 2,
              "points": [
                {
                  "x": -6.0,
                  "y": 11.0
                },
                {
                  "x": -6.112,
                  "y": 9.592
                },
                {
                  "x": -6.416,
                  "y": 7.656
                },
                {
                  "x": -6.864,
                  "y": 5.324
                },
                {
                  "x": -7.408,
                  "y": 2.7279999999999998
                },
                {
                  "x": -8.0,
                  "y": 0.0
                },
                {
                  "x": -8.592,
                  "y": -2.7279999999999998
                },
                {
                  "x": -9.136,
                  "y": -5.323999999999999
                },
                {
                  "x": -9.584,
                  "y": -7.655999999999999
                },
                {
                  "x": -9.888,
                  "y": -9.592
                },
                {
                  "x": -10.0,
                  "y": -11.0
                }
              ]
            }
          ]
        }
      ],
      "trafficLight": {
        "roadLinkIndices": [
          0,
          1,
          2,
          3,
          4,
          5,
          6,
          7,
          8,
          9,
          10,
          11
        ],
        "lightphases": [
          {
            "time": 5,
            "availableRoadLinks": [
              10,
              2,
              3,
              6
            ]
          },
          {
            "time": 30,
            "availableRoadLinks": [
              0,
              2,
              3,
              6,
              7,
              10
            ]
          },
          {
            "time": 30,
            "availableRoadLinks": [
              2,
              3,
              4,
              6,
              10,
              11
            ]
          },
          {
            "time": 30,
            "availableRoadLinks": [
              1,
              2,
              3,
              6,
              8,
              10
            ]
          },
          {
            "time": 30,
            "availableRoadLinks": [
              2,
              3,
              5,
              6,
              9,
              10
            ]
          },
          {
            "time": 30,
            "availableRoadLinks": [
              0,
              1,
              2,
              3,
              6,
              10
            ]
          },
          {
            "time": 30,
            "availableRoadLinks": [
              2,
              3,
              6,
              7,
              8,
              10
            ]
          },
          {
            "time": 30,
            "availableRoadLinks": [
              2,
              3,
              4,
              5,
              6,
              10
            ]
          },
          {
            "time": 30,
            "availableRoadLinks": [
              2,
              3,
              6,
              9,
              10,
              11
            ]
          }
        ]
      },
      "virtual": false
    },
    {
      "id": "intersection_1_2",
      "point": {
        "x": 0,
        "y": 100
      },
      "width": 11,
      "roads": [
        "road_0_2_0",
        "road_1_1_1",
        "road_2_2_2",
        "road_1_3_3",
        "road_1_2_0",
        "road_1_2_1",
        "road_1_2_2",
        "road_1_2_3"
      ],
      "roadLinks": [
        {
          "type": "go_straight",
          "startRoad": "road_0_2_0",
          "endRoad": "road_1_2_0",
          "direction": 0,
          "laneLinks": [
            {
              "startLaneIndex": 1,
              "endLaneIndex": 0,
              "points": [
                {
                  "x": -11.0,
                  "y": 94.0
                },
                {
                  "x": -9.592,
                  "y": 94.112
                },
                {
                  "x": -7.656,
                  "y": 94.416
                },
                {
                  "x": -5.324,
                  "y": 94.864
                },
                {
                  "x": -2.7279999999999998,
                  "y": 95.408
                },
                {
                  "x": 0.0,
                  "y": 96.0
                },
                {
                  "x": 2.7279999999999998,
                  "y": 96.592
                },
                {
                  "x": 5.323999999999999,
                  "y": 97.136
                },
                {
                  "x": 7.655999999999999,
                  "y": 97.58399999999999
                },
                {
                  "x": 9.592,
                  "y": 97.888
                },
                {
                  "x": 11.0,
                  "y": 98.0
                }
              ]
            },
            {
              "startLaneIndex": 1,
              "endLaneIndex": 1,
              "points": [
                {
                  "x": -11.0,
                  "y": 94.0
                },
                {
                  "x": -9.592,
                  "y": 94.0
                },
                {
                  "x": -7.656,
                  "y": 94.0
                },
                {
                  "x": -5.324,
                  "y": 94.0
                },
                {
                  "x": -2.7279999999999998,
                  "y": 94.0
                },
                {
                  "x": 0.0,
                  "y": 94.0
                },
                {
                  "x": 2.7279999999999998,
                  "y": 94.0
                },
                {
                  "x": 5.323999999999999,
                  "y": 94.0
                },
                {
                  "x": 7.655999999999999,
                  "y": 93.99999999999999
                },
                {
                  "x": 9.592,
                  "y": 94.0
                },
                {
                  "x": 11.0,
                  "y": 94.0
                }
              ]
            },
            {
              "startLaneIndex": 1,
              "endLaneIndex": 2,
              "points": [
                {
                  "x": -11.0,
                  "y": 94.0
                },
                {
                  "x": -9.592,
                  "y": 93.888
                },
                {
                  "x": -7.656,
                  "y": 93.584
                },
                {
                  "x": -5.324,
                  "y": 93.136
                },
                {
                  "x": -2.7279999999999998,
                  "y": 92.592
                },
                {
                  "x": 0.0,
                  "y": 92.0
                },
                {
                  "x": 2.7279999999999998,
                  "y": 91.408
                },
                {
                  "x": 5.323999999999999,
                  "y": 90.864
                },
                {
                  "x": 7.655999999999999,
                  "y": 90.416
                },
                {
                  "x": 9.592,
                  "y": 90.112
                },
                {
                  "x": 11.0,
                  "y": 90.0
                }
              ]
            }
          ]
        },
        {
          "type": "turn_left",
          "startRoad": "road_0_2_0",
          "endRoad": "road_1_2_1",
          "direction": 0,
          "laneLinks": [
            {
              "startLaneIndex": 0,
              "endLaneIndex": 0,
              "points": [
                {
                  "x": -11.0,
                  "y": 98.0
                },
                {
                  "x": -9.745,
                  "y": 98.265
                },
                {
                  "x": -8.24,
                  "y": 99.0
                },
                {
                  "x": -6.575,
                  "y": 100.115
                },
                {
                  "x": -4.84,
                  "y": 101.52
                },
                {
                  "x": -3.125,
                  "y": 103.125
                },
                {
                  "x": -1.52,
                  "y": 104.84
                },
                {
                  "x": -0.115000000000001,
                  "y": 106.575
                },
                {
                  "x": 0.999999999999999,
                  "y": 108.24
                },
                {
                  "x": 1.735,
                  "y": 109.745
                },
                {
                  "x": 2.0,
                  "y": 111.0
                }
              ]
            },
            {
              "startLaneIndex": 0,
              "endLaneIndex": 1,
              "points": [
                {
                  "x": -11.0,
                  "y": 98.0
                },
                {
                  "x": -9.633,
                  "y": 98.265
                },
                {
                  "x": -7.824,
                  "y": 99.0
                },
                {
                  "x": -5.711,
                  "y": 100.115
                },
                {
                  "x": -3.432,
                  "y": 101.52
                },
                {
                  "x": -1.125,
                  "y": 103.125
                },
                {
                  "x": 1.072,
                  "y": 104.84
                },
                {
                  "x": 3.020999999999999,
                  "y": 106.575
                },
                {
                  "x": 4.583999999999999,
                  "y": 108.24
                },
                {
                  "x": 5.623,
                  "y": 109.745
                },
                {
                  "x": 6.0,
                  "y": 111.0
                }
              ]
            },
            {
              "startLaneIndex": 0,
              "endLaneIndex": 2,
              "points": [
                {
                  "x": -11.0,
                  "y": 98.0
                },
                {
                  "x": -9.521,
                  "y": 98.265
                },
                {
                  "x": -7.408,
                  "y": 99.0
                },
                {
                  "x": -4.8469999999999995,
                  "y": 100.115
                },
                {
                  "x": -2.024,
                  "y": 101.52
                },
                {
                  "x": 0.875,
                  "y": 103.125
                },
                {
                  "x": 3.664,
                  "y": 104.84
                },
                {
                  "x": 6.156999999999999,
                  "y": 106.575
                },
                {
                  "x": 8.168,
                  "y": 108.24
                },
                {
                  "x": 9.511,
                  "y": 109.745
                },
                {
                  "x": 10.0,
                  "y": 111.0
                }
              ]
            }
          ]
        },
        {
          "type": "turn_right",
          "startRoad": "road_0_2_0",
          "endRoad": "road_1_2_3",
          "direction": 0,
          "laneLinks": [
            {
              "startLaneIndex": 2,
              "endLaneIndex": 0,
              "points": [
                {
                  "x": -11.0,
                  "y": 90.0
                },
                {
                  "x": -9.857,
                  "y": 90.071
                },
                {
                  "x": -8.656,
                  "y": 90.248
                },
                {
                  "x": -7.439,
                  "y": 90.477
                },
                {
                  "x": -6.248,
                  "y": 90.704
                },
                {
                  "x": -5.125,
                  "y": 90.875
                },
                {
                  "x": -4.112,
                  "y": 90.936
                },
                {
                  "x": -3.251000000000001,
                  "y": 90.833
                },
                {
                  "x": -2.584000000000001,
                  "y": 90.51199999999999
                },
                {
                  "x": -2.153,
                  "y": 89.919
                },
                {
                  "x": -2.0,
                  "y": 89.0
                }
              ]
            },
            {
              "startLaneIndex": 2,
              "endLaneIndex": 1,
              "points": [
                {
                  "x": -11.0,
                  "y": 90.0
                },
                {
                  "x": -9.969,
                  "y": 90.071
                },
                {
                  "x": -9.072,
                  "y": 90.248
                },
                {
                  "x": -8.303,
                  "y": 90.477
                },
                {
                  "x": -7.656,
                  "y": 90.704
                },
                {
                  "x": -7.125,
                  "y": 90.875
                },
                {
                  "x": -6.704,
                  "y": 90.936
                },
                {
                  "x": -6.387000000000001,
                  "y": 90.833
                },
                {
                  "x": -6.168000000000001,
                  "y": 90.51199999999999
                },
                {
                  "x": -6.0409999999999995,
                  "y": 89.919
                },
                {
                  "x": -6.0,
                  "y": 89.0
                }
              ]
            },
            {
              "startLaneIndex": 2,
              "endLaneIndex": 2,
              "points": [
                {
                  "x": -11.0,
                  "y": 90.0
                },
                {
                  "x": -10.081,
                  "y": 90.071
                },
                {
                  "x": -9.488,
                  "y": 90.248
                },
                {
                  "x": -9.167,
                  "y": 90.477
                },
                {
                  "x": -9.064,
                  "y": 90.704
                },
                {
                  "x": -9.125,
                  "y": 90.875
                },
                {
                  "x": -9.296,
                  "y": 90.936
                },
                {
                  "x": -9.523000000000001,
                  "y": 90.833
                },
                {
                  "x": -9.752,
                  "y": 90.51199999999999
                },
                {
                  "x": -9.929,
                  "y": 89.919
                },
                {
                  "x": -10.0,
                  "y": 89.0
                }
              ]
            }
          ]
        },
        {
          "type": "turn_right",
          "startRoad": "road_1_1_1",
          "endRoad": "road_1_2_0",
          "direction": 1,
          "laneLinks": [
            {
              "startLaneIndex": 2,
              "endLaneIndex": 0,
              "points": [
                {
                  "x": 10.0,
                  "y": 89.0
                },
                {
                  "x": 9.929,
                  "y": 90.143
                },
                {
                  "x": 9.752,
                  "y": 91.344
                },
                {
                  "x": 9.523,
                  "y": 92.561
                },
                {
                  "x": 9.296,
                  "y": 93.752
                },
                {
                  "x": 9.125,
                  "y": 94.875
                },
                {
                  "x": 9.064,
                  "y": 95.888
                },
                {
                  "x": 9.167,
                  "y": 96.749
                },
                {
                  "x": 9.488,
                  "y": 97.41599999999998
                },
                {
                  "x": 10.081,
                  "y": 97.847
                },
                {
                  "x": 11.0,
                  "y": 98.0
                }
              ]
            },
            {
              "startLaneIndex": 2,
              "endLaneIndex": 1,
              "points": [
                {
                  "x": 10.0,
                  "y": 89.0
                },
                {
                  "x": 9.929,
                  "y": 90.031
                },
                {
                  "x": 9.752,
                  "y": 90.928
                },
                {
                  "x": 9.523,
                  "y": 91.697
                },
                {
                  "x": 9.296,
                  "y": 92.344
                },
                {
                  "x": 9.125,
                  "y": 92.875
                },
                {
                  "x": 9.064,
                  "y": 93.29599999999999
                },
                {
                  "x": 9.167,
                  "y": 93.613
                },
                {
                  "x": 9.488,
                  "y": 93.832
                },
                {
                  "x": 10.081,
                  "y": 93.959
                },
                {
                  "x": 11.0,
                  "y": 94.0
                }
              ]
            },
            {
              "startLaneIndex": 2,
              "endLaneIndex": 2,
              "points": [
                {
                  "x": 10.0,
                  "y": 89.0
                },
                {
                  "x": 9.929,
                  "y": 89.919
                },
                {
                  "x": 9.752,
                  "y": 90.512
                },
                {
                  "x": 9.523,
                  "y": 90.833
                },
                {
                  "x": 9.296,
                  "y": 90.936
                },
                {
                  "x": 9.125,
                  "y": 90.875
                },
                {
                  "x": 9.064,
                  "y": 90.704
                },
                {
                  "x": 9.167,
                  "y": 90.477
                },
                {
                  "x": 9.488,
                  "y": 90.24799999999999
                },
                {
                  "x": 10.081,
                  "y": 90.071
                },
                {
                  "x": 11.0,
                  "y": 90.0
                }
              ]
            }
          ]
        },
        {
          "type": "go_straight",
          "startRoad": "road_1_1_1",
          "endRoad": "road_1_2_1",
          "direction": 1,
          "laneLinks": [
            {
              "startLaneIndex": 1,
              "endLaneIndex": 0,
              "points": [
                {
                  "x": 6.0,
                  "y": 89.0
                },
                {
                  "x": 5.888,
                  "y": 90.408
                },
                {
                  "x": 5.584,
                  "y": 92.344
                },
                {
                  "x": 5.136,
                  "y": 94.676
                },
                {
                  "x": 4.592,
                  "y": 97.272
                },
                {
                  "x": 4.0,
                  "y": 100.0
                },
                {
                  "x": 3.408,
                  "y": 102.728
                },
                {
                  "x": 2.864,
                  "y": 105.324
                },
                {
                  "x": 2.415999999999999,
                  "y": 107.65599999999999
                },
                {
                  "x": 2.112,
                  "y": 109.592
                },
                {
                  "x": 2.0,
                  "y": 111.0
                }
              ]
            },
            {
              "startLaneIndex": 1,
              "endLaneIndex": 1,
              "points": [
                {
                  "x": 6.0,
                  "y": 89.0
                },
                {
                  "x": 6.0,
                  "y": 90.408
                },
                {
                  "x": 6.0,
                  "y": 92.344
                },
                {
                  "x": 6.0,
                  "y": 94.676
                },
                {
                  "x": 6.0,
                  "y": 97.272
                },
                {
                  "x": 6.0,
                  "y": 100.0
                },
                {
                  "x": 6.0,
                  "y": 102.728
                },
                {
                  "x": 6.0,
                  "y": 105.324
                },
                {
                  "x": 5.999999999999999,
                  "y": 107.65599999999999
                },
                {
                  "x": 6.0,
                  "y": 109.592
                },
                {
                  "x": 6.0,
                  "y": 111.0
                }
              ]
            },
            {
              "startLaneIndex": 1,
              "endLaneIndex": 2,
              "points": [
                {
                  "x": 6.0,
                  "y": 89.0
                },
                {
                  "x": 6.112,
                  "y": 90.408
                },
                {
                  "x": 6.416,
                  "y": 92.344
                },
                {
                  "x": 6.864,
                  "y": 94.676
                },
                {
                  "x": 7.408,
                  "y": 97.272
                },
                {
                  "x": 8.0,
                  "y": 100.0
                },
                {
                  "x": 8.592,
                  "y": 102.728
                },
                {
                  "x": 9.136,
                  "y": 105.324
                },
                {
                  "x": 9.584,
                  "y": 107.65599999999999
                },
                {
                  "x": 9.888,
                  "y": 109.592
                },
                {
                  "x": 10.0,
                  "y": 111.0
                }
              ]
            }
          ]
        },
        {
          "type": "turn_left",
          "startRoad": "road_1_1_1",
          "endRoad": "road_1_2_2",
          "direction": 1,
          "laneLinks": [
            {
              "startLaneIndex": 0,
              "endLaneIndex": 0,
              "points": [
                {
                  "x": 2.0,
                  "y": 89.0
                },
                {
                  "x": 1.7349999999999999,
                  "y": 90.255
                },
                {
                  "x": 1.0,
                  "y": 91.76
                },
                {
                  "x": -0.115,
                  "y": 93.425
                },
                {
                  "x": -1.52,
                  "y": 95.16
                },
                {
                  "x": -3.125,
                  "y": 96.875
                },
                {
                  "x": -4.84,
                  "y": 98.48
                },
                {
                  "x": -6.575,
                  "y": 99.885
                },
                {
                  "x": -8.24,
                  "y": 100.99999999999999
                },
                {
                  "x": -9.745,
                  "y": 101.735
                },
                {
                  "x": -11.0,
                  "y": 102.0
                }
              ]
            },
            {
              "startLaneIndex": 0,
              "endLaneIndex": 1,
              "points": [
                {
                  "x": 2.0,
                  "y": 89.0
                },
                {
                  "x": 1.7349999999999999,
                  "y": 90.367
                },
                {
                  "x": 1.0,
                  "y": 92.176
                },
                {
                  "x": -0.115,
                  "y": 94.289
                },
                {
                  "x": -1.52,
                  "y": 96.568
                },
                {
                  "x": -3.125,
                  "y": 98.875
                },
                {
                  "x": -4.84,
                  "y": 101.072
                },
                {
                  "x": -6.575,
                  "y": 103.021
                },
                {
                  "x": -8.24,
                  "y": 104.58399999999999
                },
                {
                  "x": -9.745,
                  "y": 105.623
                },
                {
                  "x": -11.0,
                  "y": 106.0
                }
              ]
            },
            {
              "startLaneIndex": 0,
              "endLaneIndex": 2,
              "points": [
                {
                  "x": 2.0,
                  "y": 89.0
                },
                {
                  "x": 1.7349999999999999,
                  "y": 90.479
                },
                {
                  "x": 1.0,
                  "y": 92.592
                },
                {
                  "x": -0.115,
                  "y": 95.153
                },
                {
                  "x": -1.52,
                  "y": 97.976
                },
                {
                  "x": -3.125,
                  "y": 100.875
                },
                {
                  "x": -4.84,
                  "y": 103.664
                },
                {
                  "x": -6.575,
                  "y": 106.157
                },
                {
                  "x": -8.24,
                  "y": 108.16799999999999
                },
                {
                  "x": -9.745,
                  "y": 109.511
                },
                {
                  "x": -11.0,
                  "y": 110.0
                }
              ]
            }
          ]
        },
        {
          "type": "turn_right",
          "startRoad": "road_2_2_2",
          "endRoad": "road_1_2_1",
          "direction": 2,
          "laneLinks": [
            {
              "startLaneIndex": 2,
              "endLaneIndex": 0,
              "points": [
                {
                  "x": 11.0,
                  "y": 110.0
                },
                {
                  "x": 9.857,
                  "y": 109.929
                },
                {
                  "x": 8.656,
                  "y": 109.752
                },
                {
                  "x": 7.439,
                  "y": 109.523
                },
                {
                  "x": 6.248,
                  "y": 109.29599999999999
                },
                {
                  "x": 5.125,
                  "y": 109.125
                },
                {
                  "x": 4.112,
                  "y": 109.064
                },
                {
                  "x": 3.251000000000001,
                  "y": 109.167
                },
                {
                  "x": 2.584000000000001,
                  "y": 109.488
                },
                {
                  "x": 2.153,
                  "y": 110.081
                },
                {
                  "x": 2.0,
                  "y": 111.0
                }
              ]
            },
            {
              "startLaneIndex": 2,
              "endLaneIndex": 1,
              "points": [
                {
                  "x": 11.0,
                  "y": 110.0
                },
                {
                  "x": 9.969,
                  "y": 109.929
                },
                {
                  "x": 9.072,
                  "y": 109.752
                },
                {
                  "x": 8.303,
                  "y": 109.523
                },
                {
                  "x": 7.656,
                  "y": 109.29599999999999
                },
                {
                  "x": 7.125,
                  "y": 109.125
                },
                {
                  "x": 6.704,
                  "y": 109.064
                },
                {
                  "x": 6.387000000000001,
                  "y": 109.167
                },
                {
                  "x": 6.168000000000001,
                  "y": 109.488
                },
                {
                  "x": 6.0409999999999995,
                  "y": 110.081
                },
                {
                  "x": 6.0,
                  "y": 111.0
                }
              ]
            },
            {
              "startLaneIndex": 2,
              "endLaneIndex": 2,
              "points": [
                {
                  "x": 11.0,
                  "y": 110.0
                },
                {
                  "x": 10.081,
                  "y": 109.929
                },
                {
                  "x": 9.488,
                  "y": 109.752
                },
                {
                  "x": 9.167,
                  "y": 109.523
                },
                {
                  "x": 9.064,
                  "y": 109.29599999999999
                },
                {
                  "x": 9.125,
                  "y": 109.125
                },
                {
                  "x": 9.296,
                  "y": 109.064
                },
                {
                  "x": 9.523000000000001,
                  "y": 109.167
                },
                {
                  "x": 9.752,
                  "y": 109.488
                },
                {
                  "x": 9.929,
                  "y": 110.081
                },
                {
                  "x": 10.0,
                  "y": 111.0
                }
              ]
            }
          ]
        },
        {
          "type": "go_straight",
          "startRoad": "road_2_2_2",
          "endRoad": "road_1_2_2",
          "direction": 2,
          "laneLinks": [
            {
              "startLaneIndex": 1,
              "endLaneIndex": 0,
              "points": [
                {
                  "x": 11.0,
                  "y": 106.0
                },
                {
                  "x": 9.592,
                  "y": 105.888
                },
                {
                  "x": 7.656,
                  "y": 105.584
                },
                {
                  "x": 5.324,
                  "y": 105.136
                },
                {
                  "x": 2.7279999999999998,
                  "y": 104.592
                },
                {
                  "x": 0.0,
                  "y": 104.0
                },
                {
                  "x": -2.7279999999999998,
                  "y": 103.408
                },
                {
                  "x": -5.323999999999999,
                  "y": 102.864
                },
                {
                  "x": -7.655999999999999,
                  "y": 102.416
                },
                {
                  "x": -9.592,
                  "y": 102.112
                },
                {
                  "x": -11.0,
                  "y": 102.0
                }
              ]
            },
            {
              "startLaneIndex": 1,
              "endLaneIndex": 1,
              "points": [
                {
                  "x": 11.0,
                  "y": 106.0
                },
                {
                  "x": 9.592,
                  "y": 106.0
                },
                {
                  "x": 7.656,
                  "y": 106.0
                },
                {
                  "x": 5.324,
                  "y": 106.0
                },
                {
                  "x": 2.7279999999999998,
                  "y": 106.0
                },
                {
                  "x": 0.0,
                  "y": 106.0
                },
                {
                  "x": -2.7279999999999998,
                  "y": 106.0
                },
                {
                  "x": -5.323999999999999,
                  "y": 106.0
                },
                {
                  "x": -7.655999999999999,
                  "y": 106.0
                },
                {
                  "x": -9.592,
                  "y": 106.0
                },
                {
                  "x": -11.0,
                  "y": 106.0
                }
              ]
            },
            {
              "startLaneIndex": 1,
              "endLaneIndex": 2,
              "points": [
                {
                  "x": 11.0,
                  "y": 106.0
                },
                {
                  "x": 9.592,
                  "y": 106.112
                },
                {
                  "x": 7.656,
                  "y": 106.416
                },
                {
                  "x": 5.324,
                  "y": 106.864
                },
                {
                  "x": 2.7279999999999998,
                  "y": 107.408
                },
                {
                  "x": 0.0,
                  "y": 108.0
                },
                {
                  "x": -2.7279999999999998,
                  "y": 108.592
                },
                {
                  "x": -5.323999999999999,
                  "y": 109.136
                },
                {
                  "x": -7.655999999999999,
                  "y": 109.584
                },
                {
                  "x": -9.592,
                  "y": 109.888
                },
                {
                  "x": -11.0,
                  "y": 110.0
                }
              ]
            }
          ]
        },
        {
          "type": "turn_left",
          "startRoad": "road_2_2_2",
          "endRoad": "road_1_2_3",
          "direction": 2,
          "laneLinks": [
            {
              "startLaneIndex": 0,
              "endLaneIndex": 0,
              "points": [
                {
                  "x": 11.0,
                  "y": 102.0
                },
                {
                  "x": 9.745,
                  "y": 101.735
                },
                {
                  "x": 8.24,
                  "y": 101.0
                },
                {
                  "x": 6.575,
                  "y": 99.885
                },
                {
                  "x": 4.84,
                  "y": 98.48
                },
                {
                  "x": 3.125,
                  "y": 96.875
                },
                {
                  "x": 1.52,
                  "y": 95.16
                },
                {
                  "x": 0.115000000000001,
                  "y": 93.425
                },
                {
                  "x": -0.999999999999999,
                  "y": 91.76
                },
                {
                  "x": -1.735,
                  "y": 90.255
                },
                {
                  "x": -2.0,
                  "y": 89.0
                }
              ]
            },
            {
              "startLaneIndex": 0,
              "endLaneIndex": 1,
              "points": [
                {
                  "x": 11.0,
                  "y": 102.0
                },
                {
                  "x": 9.633,
                  "y": 101.735
                },
                {
                  "x": 7.824,
                  "y": 101.0
                },
                {
                  "x": 5.711,
                  "y": 99.885
                },
                {
                  "x": 3.432,
                  "y": 98.48
                },
                {
                  "x": 1.125,
                  "y": 96.875
                },
                {
                  "x": -1.072,
                  "y": 95.16
                },
                {
                  "x": -3.020999999999999,
                  "y": 93.425
                },
                {
                  "x": -4.583999999999999,
                  "y": 91.76
                },
                {
                  "x": -5.623,
                  "y": 90.255
                },
                {
                  "x": -6.0,
                  "y": 89.0
                }
              ]
            },
            {
              "startLaneIndex": 0,
              "endLaneIndex": 2,
              "points": [
                {
                  "x": 11.0,
                  "y": 102.0
                },
                {
                  "x": 9.521,
                  "y": 101.735
                },
                {
                  "x": 7.408,
                  "y": 101.0
                },
                {
                  "x": 4.8469999999999995,
                  "y": 99.885
                },
                {
                  "x": 2.024,
                  "y": 98.48
                },
                {
                  "x": -0.875,
                  "y": 96.875
                },
                {
                  "x": -3.664,
                  "y": 95.16
                },
                {
                  "x": -6.156999999999999,
                  "y": 93.425
                },
                {
                  "x": -8.168,
                  "y": 91.76
                },
                {
                  "x": -9.511,
                  "y": 90.255
                },
                {
                  "x": -10.0,
                  "y": 89.0
                }
              ]
            }
          ]
        },
        {
          "type": "turn_left",
          "startRoad": "road_1_3_3",
          "endRoad": "road_1_2_0",
          "direction": 3,
          "laneLinks": [
            {
              "startLaneIndex": 0,
              "endLaneIndex": 0,
              "points": [
                {
                  "x": -2.0,
                  "y": 111.0
                },
                {
                  "x": -1.7349999999999999,
                  "y": 109.745
                },
                {
                  "x": -1.0,
                  "y": 108.24
                },
                {
                  "x": 0.115,
                  "y": 106.575
                },
                {
                  "x": 1.52,
                  "y": 104.84
                },
                {
                  "x": 3.125,
                  "y": 103.125
                },
                {
                  "x": 4.84,
                  "y": 101.52
                },
                {
                  "x": 6.575,
                  "y": 100.115
                },
                {
                  "x": 8.24,
                  "y": 99.0
                },
                {
                  "x": 9.745,
                  "y": 98.265
                },
                {
                  "x": 11.0,
                  "y": 98.0
                }
              ]
            },
            {
              "startLaneIndex": 0,
              "endLaneIndex": 1,
              "points": [
                {
                  "x": -2.0,
                  "y": 111.0
                },
                {
                  "x": -1.7349999999999999,
                  "y": 109.633
                },
                {
                  "x": -1.0,
                  "y": 107.824
                },
                {
                  "x": 0.115,
                  "y": 105.711
                },
                {
                  "x": 1.52,
                  "y": 103.432
                },
                {
                  "x": 3.125,
                  "y": 101.125
                },
                {
                  "x": 4.84,
                  "y": 98.928
                },
                {
                  "x": 6.575,
                  "y": 96.979
                },
                {
                  "x": 8.24,
                  "y": 95.416
                },
                {
                  "x": 9.745,
                  "y": 94.377
                },
                {
                  "x": 11.0,
                  "y": 94.0
                }
              ]
            },
            {
              "startLaneIndex": 0,
              "endLaneIndex": 2,
              "points": [
                {
                  "x": -2.0,
                  "y": 111.0
                },
                {
                  "x": -1.7349999999999999,
                  "y": 109.521
                },
                {
                  "x": -1.0,
                  "y": 107.408
                },
                {
                  "x": 0.115,
                  "y": 104.847
                },
                {
                  "x": 1.52,
                  "y": 102.024
                },
                {
                  "x": 3.125,
                  "y": 99.125
                },
                {
                  "x": 4.84,
                  "y": 96.336
                },
                {
                  "x": 6.575,
                  "y": 93.843
                },
                {
                  "x": 8.24,
                  "y": 91.832
                },
                {
                  "x": 9.745,
                  "y": 90.489
                },
                {
                  "x": 11.0,
                  "y": 90.0
                }
              ]
            }
          ]
        },
        {
          "type": "turn_right",
          "startRoad": "road_1_3_3",
          "endRoad": "road_1_2_2",
          "direction": 3,
          "laneLinks": [
            {
              "startLaneIndex": 2,
              "endLaneIndex": 0,
              "points": [
                {
                  "x": -10.0,
                  "y": 111.0
                },
                {
                  "x": -9.929,
                  "y": 109.857
                },
                {
                  "x": -9.752,
                  "y": 108.656
                },
                {
                  "x": -9.523,
                  "y": 107.439
                },
                {
                  "x": -9.296,
                  "y": 106.248
                },
                {
                  "x": -9.125,
                  "y": 105.125
                },
                {
                  "x": -9.064,
                  "y": 104.112
                },
                {
                  "x": -9.167,
                  "y": 103.251
                },
                {
                  "x": -9.488,
                  "y": 102.584
                },
                {
                  "x": -10.081,
                  "y": 102.153
                },
                {
                  "x": -11.0,
                  "y": 102.0
                }
              ]
            },
            {
              "startLaneIndex": 2,
              "endLaneIndex": 1,
              "points": [
                {
                  "x": -10.0,
                  "y": 111.0
                },
                {
                  "x": -9.929,
                  "y": 109.969
                },
                {
                  "x": -9.752,
                  "y": 109.072
                },
                {
                  "x": -9.523,
                  "y": 108.303
                },
                {
                  "x": -9.296,
                  "y": 107.656
                },
                {
                  "x": -9.125,
                  "y": 107.125
                },
                {
                  "x": -9.064,
                  "y": 106.704
                },
                {
                  "x": -9.167,
                  "y": 106.387
                },
                {
                  "x": -9.488,
                  "y": 106.168
                },
                {
                  "x": -10.081,
                  "y": 106.041
                },
                {
                  "x": -11.0,
                  "y": 106.0
                }
              ]
            },
            {
              "startLaneIndex": 2,
              "endLaneIndex": 2,
              "points": [
                {
                  "x": -10.0,
                  "y": 111.0
                },
                {
                  "x": -9.929,
                  "y": 110.081
                },
                {
                  "x": -9.752,
                  "y": 109.488
                },
                {
                  "x": -9.523,
                  "y": 109.167
                },
                {
                  "x": -9.296,
                  "y": 109.064
                },
                {
                  "x": -9.125,
                  "y": 109.125
                },
                {
                  "x": -9.064,
                  "y": 109.29599999999999
                },
                {
                  "x": -9.167,
                  "y": 109.523
                },
                {
                  "x": -9.488,
                  "y": 109.752
                },
                {
                  "x": -10.081,
                  "y": 109.929
                },
                {
                  "x": -11.0,
                  "y": 110.0
                }
              ]
            }
          ]
        },
        {
          "type": "go_straight",
          "startRoad": "road_1_3_3",
          "endRoad": "road_1_2_3",
          "direction": 3,
          "laneLinks": [
            {
              "startLaneIndex": 1,
              "endLaneIndex": 0,
              "points": [
                {
                  "x": -6.0,
                  "y": 111.0
                },
                {
                  "x": -5.888,
                  "y": 109.592
                },
                {
                  "x": -5.584,
                  "y": 107.656
                },
                {
                  "x": -5.136,
                  "y": 105.324
                },
                {
                  "x": -4.592,
                  "y": 102.728
                },
                {
                  "x": -4.0,
                  "y": 100.0
                },
                {
                  "x": -3.408,
                  "y": 97.272
                },
                {
                  "x": -2.864,
                  "y": 94.676
                },
                {
                  "x": -2.415999999999999,
                  "y": 92.344
                },
                {
                  "x": -2.112,
                  "y": 90.408
                },
                {
                  "x": -2.0,
                  "y": 89.0
                }
              ]
            },
            {
              "startLaneIndex": 1,
              "endLaneIndex": 1,
              "points": [
                {
                  "x": -6.0,
                  "y": 111.0
                },
                {
                  "x": -6.0,
                  "y": 109.592
                },
                {
                  "x": -6.0,
                  "y": 107.656
                },
                {
                  "x": -6.0,
                  "y": 105.324
                },
                {
                  "x": -6.0,
                  "y": 102.728
                },
                {
                  "x": -6.0,
                  "y": 100.0
                },
                {
                  "x": -6.0,
                  "y": 97.272
                },
                {
                  "x": -6.0,
                  "y": 94.676
                },
                {
                  "x": -5.999999999999999,
                  "y": 92.344
                },
                {
                  "x": -6.0,
                  "y": 90.408
                },
                {
                  "x": -6.0,
                  "y": 89.0
                }
              ]
            },
            {
              "startLaneIndex": 1,
              "endLaneIndex": 2,
              "points": [
                {
                  "x": -6.0,
                  "y": 111.0
                },
                {
                  "x": -6.112,
                  "y": 109.592
                },
                {
                  "x": -6.416,
                  "y": 107.656
                },
                {
                  "x": -6.864,
                  "y": 105.324
                },
                {
                  "x": -7.408,
                  "y": 102.728
                },
                {
                  "x": -8.0,
                  "y": 100.0
                },
                {
                  "x": -8.592,
                  "y": 97.272
                },
                {
                  "x": -9.136,
                  "y": 94.676
                },
                {
                  "x": -9.584,
                  "y": 92.344
                },
                {
                  "x": -9.888,
                  "y": 90.408
                },
                {
                  "x": -10.0,
                  "y": 89.0
                }
              ]
            }
          ]
        }
      ],
      "trafficLight": {
        "roadLinkIndices": [
          0,
          1,
          2,
          3,
          4,
          5,
          6,
          7,
          8,
          9,
          10,
          11
        ],
        "lightphases": [
          {
            "time": 5,
            "availableRoadLinks": [
              10,
              2,
              3,
              6
            ]
          },
          {
            "time": 30,
            "availableRoadLinks": [
              0,
              2,
              3,
              6,
              7,
              10
            ]
          },
          {
            "time": 30,
            "availableRoadLinks": [
              2,
              3,
              4,
              6,
              10,
              11
            ]
          },
          {
            "time": 30,
            "availableRoadLinks": [
              1,
              2,
              3,
              6,
              8,
              10
            ]
          },
          {
            "time": 30,
            "availableRoadLinks": [
              2,
              3,
              5,
              6,
              9,
              10
            ]
          },
          {
            "time": 30,
            "availableRoadLinks": [
              0,
              1,
              2,
              3,
              6,
              10
            ]
          },
          {
            "time": 30,
            "availableRoadLinks": [
              2,
              3,
              6,
              7,
              8,
              10
            ]
          },
          {
            "time": 30,
            "availableRoadLinks": [
              2,
              3,
              4,
              5,
              6,
              10
            ]
          },
          {
            "time": 30,
            "availableRoadLinks": [
              2,
              3,
              6,
              9,
              10,
              11
            ]
          }
        ]
      },
      "virtual": false
    },
    {
      "id": "intersection_1_3",
      "point": {
        "x": 0,
        "y": 200
      },
      "width": 11,
      "roads": [
        "road_0_3_0",
        "road_1_2_1",
        "road_2_3_2",
        "road_1_4_3",
        "road_1_3_0",
        "road_1_3_1",
        "road_1_3_2",
        "road_1_3_3"
      ],
      "roadLinks": [
        {
          "type": "go_straight",
          "startRoad": "road_0_3_0",
          "endRoad": "road_1_3_0",
          "direction": 0,
          "laneLinks": [
            {
              "startLaneIndex": 1,
              "endLaneIndex": 0,
              "points": [
                {
                  "x": -11.0,
                  "y": 194.0
                },
                {
                  "x": -9.592,
                  "y": 194.112
                },
                {
                  "x": -7.656,
                  "y": 194.416
                },
                {
                  "x": -5.324,
                  "y": 194.864
                },
                {
                  "x": -2.7279999999999998,
                  "y": 195.408
                },
                {
                  "x": 0.0,
                  "y": 196.0
                },
                {
                  "x": 2.7279999999999998,
                  "y": 196.59199999999998
                },
                {
                  "x": 5.323999999999999,
                  "y": 197.136
                },
                {
                  "x": 7.655999999999999,
                  "y": 197.584
                },
                {
                  "x": 9.592,
                  "y": 197.888
                },
                {
                  "x": 11.0,
                  "y": 198.0
                }
              ]
            },
            {
              "startLaneIndex": 1,
              "endLaneIndex": 1,
              "points": [
                {
                  "x": -11.0,
                  "y": 194.0
                },
                {
                  "x": -9.592,
                  "y": 194.0
                },
                {
                  "x": -7.656,
                  "y": 194.0
                },
                {
                  "x": -5.324,
                  "y": 194.0
                },
                {
                  "x": -2.7279999999999998,
                  "y": 194.0
                },
                {
                  "x": 0.0,
                  "y": 194.0
                },
                {
                  "x": 2.7279999999999998,
                  "y": 194.0
                },
                {
                  "x": 5.323999999999999,
                  "y": 194.0
                },
                {
                  "x": 7.655999999999999,
                  "y": 194.0
                },
                {
                  "x": 9.592,
                  "y": 194.0
                },
                {
                  "x": 11.0,
                  "y": 194.0
                }
              ]
            },
            {
              "startLaneIndex": 1,
              "endLaneIndex": 2,
              "points": [
                {
                  "x": -11.0,
                  "y": 194.0
                },
                {
                  "x": -9.592,
                  "y": 193.888
                },
                {
                  "x": -7.656,
                  "y": 193.584
                },
                {
                  "x": -5.324,
                  "y": 193.136
                },
                {
                  "x": -2.7279999999999998,
                  "y": 192.59199999999998
                },
                {
                  "x": 0.0,
                  "y": 192.0
                },
                {
                  "x": 2.7279999999999998,
                  "y": 191.408
                },
                {
                  "x": 5.323999999999999,
                  "y": 190.864
                },
                {
                  "x": 7.655999999999999,
                  "y": 190.416
                },
                {
                  "x": 9.592,
                  "y": 190.112
                },
                {
                  "x": 11.0,
                  "y": 190.0
                }
              ]
            }
          ]
        },
        {
          "type": "turn_left",
          "startRoad": "road_0_3_0",
          "endRoad": "road_1_3_1",
          "direction": 0,
          "laneLinks": [
            {
              "startLaneIndex": 0,
              "endLaneIndex": 0,
              "points": [
                {
                  "x": -11.0,
                  "y": 198.0
                },
                {
                  "x": -9.745,
                  "y": 198.265
                },
                {
                  "x": -8.24,
                  "y": 199.0
                },
                {
                  "x": -6.575,
                  "y": 200.115
                },
                {
                  "x": -4.84,
                  "y": 201.52
                },
                {
                  "x": -3.125,
                  "y": 203.125
                },
                {
                  "x": -1.52,
                  "y": 204.84
                },
                {
                  "x": -0.115000000000001,
                  "y": 206.575
                },
                {
                  "x": 0.999999999999999,
                  "y": 208.24
                },
                {
                  "x": 1.735,
                  "y": 209.745
                },
                {
                  "x": 2.0,
                  "y": 211.0
                }
              ]
            },
            {
              "startLaneIndex": 0,
              "endLaneIndex": 1,
              "points": [
                {
                  "x": -11.0,
                  "y": 198.0
                },
                {
                  "x": -9.633,
                  "y": 198.265
                },
                {
                  "x": -7.824,
                  "y": 199.0
                },
                {
                  "x": -5.711,
                  "y": 200.115
                },
                {
                  "x": -3.432,
                  "y": 201.52
                },
                {
                  "x": -1.125,
                  "y": 203.125
                },
                {
                  "x": 1.072,
                  "y": 204.84
                },
                {
                  "x": 3.020999999999999,
                  "y": 206.575
                },
                {
                  "x": 4.583999999999999,
                  "y": 208.24
                },
                {
                  "x": 5.623,
                  "y": 209.745
                },
                {
                  "x": 6.0,
                  "y": 211.0
                }
              ]
            },
            {
              "startLaneIndex": 0,
              "endLaneIndex": 2,
              "points": [
                {
                  "x": -11.0,
                  "y": 198.0
                },
                {
                  "x": -9.521,
                  "y": 198.265
                },
                {
                  "x": -7.408,
                  "y": 199.0
                },
                {
                  "x": -4.8469999999999995,
                  "y": 200.115
                },
                {
                  "x": -2.024,
                  "y": 201.52
                },
                {
                  "x": 0.875,
                  "y": 203.125
                },
                {
                  "x": 3.664,
                  "y": 204.84
                },
                {
                  "x": 6.156999999999999,
                  "y": 206.575
                },
                {
                  "x": 8.168,
                  "y": 208.24
                },
                {
                  "x": 9.511,
                  "y": 209.745
                },
                {
                  "x": 10.0,
                  "y": 211.0
                }
              ]
            }
          ]
        },
        {
          "type": "turn_right",
          "startRoad": "road_0_3_0",
          "endRoad": "road_1_3_3",
          "direction": 0,
          "laneLinks": [
            {
              "startLaneIndex": 2,
              "endLaneIndex": 0,
              "points": [
                {
                  "x": -11.0,
                  "y": 190.0
                },
                {
                  "x": -9.857,
                  "y": 190.071
                },
                {
                  "x": -8.656,
                  "y": 190.248
                },
                {
                  "x": -7.439,
                  "y": 190.477
                },
                {
                  "x": -6.248,
                  "y": 190.704
                },
                {
                  "x": -5.125,
                  "y": 190.875
                },
                {
                  "x": -4.112,
                  "y": 190.936
                },
                {
                  "x": -3.251000000000001,
                  "y": 190.833
                },
                {
                  "x": -2.584000000000001,
                  "y": 190.512
                },
                {
                  "x": -2.153,
                  "y": 189.919
                },
                {
                  "x": -2.0,
                  "y": 189.0
                }
              ]
            },
            {
              "startLaneIndex": 2,
              "endLaneIndex": 1,
              "points": [
                {
                  "x": -11.0,
                  "y": 190.0
                },
                {
                  "x": -9.969,
                  "y": 190.071
                },
                {
                  "x": -9.072,
                  "y": 190.248
                },
                {
                  "x": -8.303,
                  "y": 190.477
                },
                {
                  "x": -7.656,
                  "y": 190.704
                },
                {
                  "x": -7.125,
                  "y": 190.875
                },
                {
                  "x": -6.704,
                  "y": 190.936
                },
                {
                  "x": -6.387000000000001,
                  "y": 190.833
                },
                {
                  "x": -6.168000000000001,
                  "y": 190.512
                },
                {
                  "x": -6.0409999999999995,
                  "y": 189.919
                },
                {
                  "x": -6.0,
                  "y": 189.0
                }
              ]
            },
            {
              "startLaneIndex": 2,
              "endLaneIndex": 2,
              "points": [
                {
                  "x": -11.0,
                  "y": 190.0
                },
                {
                  "x": -10.081,
                  "y": 190.071
                },
                {
                  "x": -9.488,
                  "y": 190.248
                },
                {
                  "x": -9.167,
                  "y": 190.477
                },
                {
                  "x": -9.064,
                  "y": 190.704
                },
                {
                  "x": -9.125,
                  "y": 190.875
                },
                {
                  "x": -9.296,
                  "y": 190.936
                },
                {
                  "x": -9.523000000000001,
                  "y": 190.833
                },
                {
                  "x": -9.752,
                  "y": 190.512
                },
                {
                  "x": -9.929,
                  "y": 189.919
                },
                {
                  "x": -10.0,
                  "y": 189.0
                }
              ]
            }
          ]
        },
        {
          "type": "turn_right",
          "startRoad": "road_1_2_1",
          "endRoad": "road_1_3_0",
          "direction": 1,
          "laneLinks": [
            {
              "startLaneIndex": 2,
              "endLaneIndex": 0,
              "points": [
                {
                  "x": 10.0,
                  "y": 189.0
                },
                {
                  "x": 9.929,
                  "y": 190.143
                },
                {
                  "x": 9.752,
                  "y": 191.344
                },
                {
                  "x": 9.523,
                  "y": 192.561
                },
                {
                  "x": 9.296,
                  "y": 193.752
                },
                {
                  "x": 9.125,
                  "y": 194.875
                },
                {
                  "x": 9.064,
                  "y": 195.888
                },
                {
                  "x": 9.167,
                  "y": 196.749
                },
                {
                  "x": 9.488,
                  "y": 197.416
                },
                {
                  "x": 10.081,
                  "y": 197.847
                },
                {
                  "x": 11.0,
                  "y": 198.0
                }
              ]
            },
            {
              "startLaneIndex": 2,
              "endLaneIndex": 1,
              "points": [
                {
                  "x": 10.0,
                  "y": 189.0
                },
                {
                  "x": 9.929,
                  "y": 190.031
                },
                {
                  "x": 9.752,
                  "y": 190.928
                },
                {
                  "x": 9.523,
                  "y": 191.697
                },
                {
                  "x": 9.296,
                  "y": 192.344
                },
                {
                  "x": 9.125,
                  "y": 192.875
                },
                {
                  "x": 9.064,
                  "y": 193.296
                },
                {
                  "x": 9.167,
                  "y": 193.613
                },
                {
                  "x": 9.488,
                  "y": 193.832
                },
                {
                  "x": 10.081,
                  "y": 193.959
                },
                {
                  "x": 11.0,
                  "y": 194.0
                }
              ]
            },
            {
              "startLaneIndex": 2,
              "endLaneIndex": 2,
              "points": [
                {
                  "x": 10.0,
                  "y": 189.0
                },
                {
                  "x": 9.929,
                  "y": 189.919
                },
                {
                  "x": 9.752,
                  "y": 190.512
                },
                {
                  "x": 9.523,
                  "y": 190.833
                },
                {
                  "x": 9.296,
                  "y": 190.936
                },
                {
                  "x": 9.125,
                  "y": 190.875
                },
                {
                  "x": 9.064,
                  "y": 190.704
                },
                {
                  "x": 9.167,
                  "y": 190.477
                },
                {
                  "x": 9.488,
                  "y": 190.248
                },
                {
                  "x": 10.081,
                  "y": 190.071
                },
                {
                  "x": 11.0,
                  "y": 190.0
                }
              ]
            }
          ]
        },
        {
          "type": "go_straight",
          "startRoad": "road_1_2_1",
          "endRoad": "road_1_3_1",
          "direction": 1,
          "laneLinks": [
            {
              "startLaneIndex": 1,
              "endLaneIndex": 0,
              "points": [
                {
                  "x": 6.0,
                  "y": 189.0
                },
                {
                  "x": 5.888,
                  "y": 190.408
                },
                {
                  "x": 5.584,
                  "y": 192.344
                },
                {
                  "x": 5.136,
                  "y": 194.676
                },
                {
                  "x": 4.592,
                  "y": 197.272
                },
                {
                  "x": 4.0,
                  "y": 200.0
                },
                {
                  "x": 3.408,
                  "y": 202.728
                },
                {
                  "x": 2.864,
                  "y": 205.324
                },
                {
                  "x": 2.415999999999999,
                  "y": 207.656
                },
                {
                  "x": 2.112,
                  "y": 209.59199999999998
                },
                {
                  "x": 2.0,
                  "y": 211.0
                }
              ]
            },
            {
              "startLaneIndex": 1,
              "endLaneIndex": 1,
              "points": [
                {
                  "x": 6.0,
                  "y": 189.0
                },
                {
                  "x": 6.0,
                  "y": 190.408
                },
                {
                  "x": 6.0,
                  "y": 192.344
                },
                {
                  "x": 6.0,
                  "y": 194.676
                },
                {
                  "x": 6.0,
                  "y": 197.272
                },
                {
                  "x": 6.0,
                  "y": 200.0
                },
                {
                  "x": 6.0,
                  "y": 202.728
                },
                {
                  "x": 6.0,
                  "y": 205.324
                },
                {
                  "x": 5.999999999999999,
                  "y": 207.656
                },
                {
                  "x": 6.0,
                  "y": 209.59199999999998
                },
                {
                  "x": 6.0,
                  "y": 211.0
                }
              ]
            },
            {
              "startLaneIndex": 1,
              "endLaneIndex": 2,
              "points": [
                {
                  "x": 6.0,
                  "y": 189.0
                },
                {
                  "x": 6.112,
                  "y": 190.408
                },
                {
                  "x": 6.416,
                  "y": 192.344
                },
                {
                  "x": 6.864,
                  "y": 194.676
                },
                {
                  "x": 7.408,
                  "y": 197.272
                },
                {
                  "x": 8.0,
                  "y": 200.0
                },
                {
                  "x": 8.592,
                  "y": 202.728
                },
                {
                  "x": 9.136,
                  "y": 205.324
                },
                {
                  "x": 9.584,
                  "y": 207.656
                },
                {
                  "x": 9.888,
                  "y": 209.59199999999998
                },
                {
                  "x": 10.0,
                  "y": 211.0
                }
              ]
            }
          ]
        },
        {
          "type": "turn_left",
          "startRoad": "road_1_2_1",
          "endRoad": "road_1_3_2",
          "direction": 1,
          "laneLinks": [
            {
              "startLaneIndex": 0,
              "endLaneIndex": 0,
              "points": [
                {
                  "x": 2.0,
                  "y": 189.0
                },
                {
                  "x": 1.7349999999999999,
                  "y": 190.255
                },
                {
                  "x": 1.0,
                  "y": 191.76
                },
                {
                  "x": -0.115,
                  "y": 193.425
                },
                {
                  "x": -1.52,
                  "y": 195.16
                },
                {
                  "x": -3.125,
                  "y": 196.875
                },
                {
                  "x": -4.84,
                  "y": 198.48
                },
                {
                  "x": -6.575,
                  "y": 199.885
                },
                {
                  "x": -8.24,
                  "y": 201.0
                },
                {
                  "x": -9.745,
                  "y": 201.735
                },
                {
                  "x": -11.0,
                  "y": 202.0
                }
              ]
            },
            {
              "startLaneIndex": 0,
              "endLaneIndex": 1,
              "points": [
                {
                  "x": 2.0,
                  "y": 189.0
                },
                {
                  "x": 1.7349999999999999,
                  "y": 190.367
                },
                {
                  "x": 1.0,
                  "y": 192.176
                },
                {
                  "x": -0.115,
                  "y": 194.289
                },
                {
                  "x": -1.52,
                  "y": 196.568
                },
                {
                  "x": -3.125,
                  "y": 198.875
                },
                {
                  "x": -4.84,
                  "y": 201.072
                },
                {
                  "x": -6.575,
                  "y": 203.021
                },
                {
                  "x": -8.24,
                  "y": 204.584
                },
                {
                  "x": -9.745,
                  "y": 205.623
                },
                {
                  "x": -11.0,
                  "y": 206.0
                }
              ]
            },
            {
              "startLaneIndex": 0,
              "endLaneIndex": 2,
              "points": [
                {
                  "x": 2.0,
                  "y": 189.0
                },
                {
                  "x": 1.7349999999999999,
                  "y": 190.47899999999998
                },
                {
                  "x": 1.0,
                  "y": 192.59199999999998
                },
                {
                  "x": -0.115,
                  "y": 195.153
                },
                {
                  "x": -1.52,
                  "y": 197.976
                },
                {
                  "x": -3.125,
                  "y": 200.875
                },
                {
                  "x": -4.84,
                  "y": 203.664
                },
                {
                  "x": -6.575,
                  "y": 206.157
                },
                {
                  "x": -8.24,
                  "y": 208.168
                },
                {
                  "x": -9.745,
                  "y": 209.511
                },
                {
                  "x": -11.0,
                  "y": 210.0
                }
              ]
            }
          ]
        },
        {
          "type": "turn_right",
          "startRoad": "road_2_3_2",
          "endRoad": "road_1_3_1",
          "direction": 2,
          "laneLinks": [
            {
              "startLaneIndex": 2,
              "endLaneIndex": 0,
              "points": [
                {
                  "x": 11.0,
                  "y": 210.0
                },
                {
                  "x": 9.857,
                  "y": 209.929
                },
                {
                  "x": 8.656,
                  "y": 209.752
                },
                {
                  "x": 7.439,
                  "y": 209.523
                },
                {
                  "x": 6.248,
                  "y": 209.296
                },
                {
                  "x": 5.125,
                  "y": 209.125
                },
                {
                  "x": 4.112,
                  "y": 209.064
                },
                {
                  "x": 3.251000000000001,
                  "y": 209.167
                },
                {
                  "x": 2.584000000000001,
                  "y": 209.488
                },
                {
                  "x": 2.153,
                  "y": 210.081
                },
                {
                  "x": 2.0,
                  "y": 211.0
                }
              ]
            },
            {
              "startLaneIndex": 2,
              "endLaneIndex": 1,
              "points": [
                {
                  "x": 11.0,
                  "y": 210.0
                },
                {
                  "x": 9.969,
                  "y": 209.929
                },
                {
                  "x": 9.072,
                  "y": 209.752
                },
                {
                  "x": 8.303,
                  "y": 209.523
                },
                {
                  "x": 7.656,
                  "y": 209.296
                },
                {
                  "x": 7.125,
                  "y": 209.125
                },
                {
                  "x": 6.704,
                  "y": 209.064
                },
                {
                  "x": 6.387000000000001,
                  "y": 209.167
                },
                {
                  "x": 6.168000000000001,
                  "y": 209.488
                },
                {
                  "x": 6.0409999999999995,
                  "y": 210.081
                },
                {
                  "x": 6.0,
                  "y": 211.0
                }
              ]
            },
            {
              "startLaneIndex": 2,
              "endLaneIndex": 2,
              "points": [
                {
                  "x": 11.0,
                  "y": 210.0
                },
                {
                  "x": 10.081,
                  "y": 209.929
                },
                {
                  "x": 9.488,
                  "y": 209.752
                },
                {
                  "x": 9.167,
                  "y": 209.523
                },
                {
                  "x": 9.064,
                  "y": 209.296
                },
                {
                  "x": 9.125,
                  "y": 209.125
                },
                {
                  "x": 9.296,
                  "y": 209.064
                },
                {
                  "x": 9.523000000000001,
                  "y": 209.167
                },
                {
                  "x": 9.752,
                  "y": 209.488
                },
                {
                  "x": 9.929,
                  "y": 210.081
                },
                {
                  "x": 10.0,
                  "y": 211.0
                }
              ]
            }
          ]
        },
        {
          "type": "go_straight",
          "startRoad": "road_2_3_2",
          "endRoad": "road_1_3_2",
          "direction": 2,
          "laneLinks": [
            {
              "startLaneIndex": 1,
              "endLaneIndex": 0,
              "points": [
                {
                  "x": 11.0,
                  "y": 206.0
                },
                {
                  "x": 9.592,
                  "y": 205.888
                },
                {
                  "x": 7.656,
                  "y": 205.584
                },
                {
                  "x": 5.324,
                  "y": 205.136
                },
                {
                  "x": 2.7279999999999998,
                  "y": 204.59199999999998
                },
                {
                  "x": 0.0,
                  "y": 204.0
                },
                {
                  "x": -2.7279999999999998,
                  "y": 203.408
                },
                {
                  "x": -5.323999999999999,
                  "y": 202.864
                },
                {
                  "x": -7.655999999999999,
                  "y": 202.416
                },
                {
                  "x": -9.592,
                  "y": 202.11200000000002
                },
                {
                  "x": -11.0,
                  "y": 202.0
                }
              ]
            },
            {
              "startLaneIndex": 1,
              "endLaneIndex": 1,
              "points": [
                {
                  "x": 11.0,
                  "y": 206.0
                },
                {
                  "x": 9.592,
                  "y": 206.0
                },
                {
                  "x": 7.656,
                  "y": 206.0
                },
                {
                  "x": 5.324,
                  "y": 206.0
                },
                {
                  "x": 2.7279999999999998,
                  "y": 206.0
                },
                {
                  "x": 0.0,
                  "y": 206.0
                },
                {
                  "x": -2.7279999999999998,
                  "y": 206.0
                },
                {
                  "x": -5.323999999999999,
                  "y": 206.0
                },
                {
                  "x": -7.655999999999999,
                  "y": 206.0
                },
                {
                  "x": -9.592,
                  "y": 206.0
                },
                {
                  "x": -11.0,
                  "y": 206.0
                }
              ]
            },
            {
              "startLaneIndex": 1,
              "endLaneIndex": 2,
              "points": [
                {
                  "x": 11.0,
                  "y": 206.0
                },
                {
                  "x": 9.592,
                  "y": 206.112
                },
                {
                  "x": 7.656,
                  "y": 206.416
                },
                {
                  "x": 5.324,
                  "y": 206.864
                },
                {
                  "x": 2.7279999999999998,
                  "y": 207.408
                },
                {
                  "x": 0.0,
                  "y": 208.0
                },
                {
                  "x": -2.7279999999999998,
                  "y": 208.59199999999998
                },
                {
                  "x": -5.323999999999999,
                  "y": 209.136
                },
                {
                  "x": -7.655999999999999,
                  "y": 209.584
                },
                {
                  "x": -9.592,
                  "y": 209.888
                },
                {
                  "x": -11.0,
                  "y": 210.0
                }
              ]
            }
          ]
        },
        {
          "type": "turn_left",
          "startRoad": "road_2_3_2",
          "endRoad": "road_1_3_3",
          "direction": 2,
          "laneLinks": [
            {
              "startLaneIndex": 0,
              "endLaneIndex": 0,
              "points": [
                {
                  "x": 11.0,
                  "y": 202.0
                },
                {
                  "x": 9.745,
                  "y": 201.735
                },
                {
                  "x": 8.24,
                  "y": 201.0
                },
                {
                  "x": 6.575,
                  "y": 199.885
                },
                {
                  "x": 4.84,
                  "y": 198.48
                },
                {
                  "x": 3.125,
                  "y": 196.875
                },
                {
                  "x": 1.52,
                  "y": 195.16
                },
                {
                  "x": 0.115000000000001,
                  "y": 193.425
                },
                {
                  "x": -0.999999999999999,
                  "y": 191.76
                },
                {
                  "x": -1.735,
                  "y": 190.255
                },
                {
                  "x": -2.0,
                  "y": 189.0
                }
              ]
            },
            {
              "startLaneIndex": 0,
              "endLaneIndex": 1,
              "points": [
                {
                  "x": 11.0,
                  "y": 202.0
                },
                {
                  "x": 9.633,
                  "y": 201.735
                },
                {
                  "x": 7.824,
                  "y": 201.0
                },
                {
                  "x": 5.711,
                  "y": 199.885
                },
                {
                  "x": 3.432,
                  "y": 198.48
                },
                {
                  "x": 1.125,
                  "y": 196.875
                },
                {
                  "x": -1.072,
                  "y": 195.16
                },
                {
                  "x": -3.020999999999999,
                  "y": 193.425
                },
                {
                  "x": -4.583999999999999,
                  "y": 191.76
                },
                {
                  "x": -5.623,
                  "y": 190.255
                },
                {
                  "x": -6.0,
                  "y": 189.0
                }
              ]
            },
            {
              "startLaneIndex": 0,
              "endLaneIndex": 2,
              "points": [
                {
                  "x": 11.0,
                  "y": 202.0
                },
                {
                  "x": 9.521,
                  "y": 201.735
                },
                {
                  "x": 7.408,
                  "y": 201.0
                },
                {
                  "x": 4.8469999999999995,
                  "y": 199.885
                },
                {
                  "x": 2.024,
                  "y": 198.48
                },
                {
                  "x": -0.875,
                  "y": 196.875
                },
                {
                  "x": -3.664,
                  "y": 195.16
                },
                {
                  "x": -6.156999999999999,
                  "y": 193.425
                },
                {
                  "x": -8.168,
                  "y": 191.76
                },
                {
                  "x": -9.511,
                  "y": 190.255
                },
                {
                  "x": -10.0,
                  "y": 189.0
                }
              ]
            }
          ]
        },
        {
          "type": "turn_left",
          "startRoad": "road_1_4_3",
          "endRoad": "road_1_3_0",
          "direction": 3,
          "laneLinks": [
            {
              "startLaneIndex": 0,
              "endLaneIndex": 0,
              "points": [
                {
                  "x": -2.0,
                  "y": 211.0
                },
                {
                  "x": -1.7349999999999999,
                  "y": 209.745
                },
                {
                  "x": -1.0,
                  "y": 208.24
                },
                {
                  "x": 0.115,
                  "y": 206.575
                },
                {
                  "x": 1.52,
                  "y": 204.84
                },
                {
                  "x": 3.125,
                  "y": 203.125
                },
                {
                  "x": 4.84,
                  "y": 201.52
                },
                {
                  "x": 6.575,
                  "y": 200.115
                },
                {
                  "x": 8.24,
                  "y": 199.0
                },
                {
                  "x": 9.745,
                  "y": 198.265
                },
                {
                  "x": 11.0,
                  "y": 198.0
                }
              ]
            },
            {
              "startLaneIndex": 0,
              "endLaneIndex": 1,
              "points": [
                {
                  "x": -2.0,
                  "y": 211.0
                },
                {
                  "x": -1.7349999999999999,
                  "y": 209.633
                },
                {
                  "x": -1.0,
                  "y": 207.824
                },
                {
                  "x": 0.115,
                  "y": 205.711
                },
                {
                  "x": 1.52,
                  "y": 203.432
                },
                {
                  "x": 3.125,
                  "y": 201.125
                },
                {
                  "x": 4.84,
                  "y": 198.928
                },
                {
                  "x": 6.575,
                  "y": 196.979
                },
                {
                  "x": 8.24,
                  "y": 195.416
                },
                {
                  "x": 9.745,
                  "y": 194.377
                },
                {
                  "x": 11.0,
                  "y": 194.0
                }
              ]
            },
            {
              "startLaneIndex": 0,
              "endLaneIndex": 2,
              "points": [
                {
                  "x": -2.0,
                  "y": 211.0
                },
                {
                  "x": -1.7349999999999999,
                  "y": 209.521
                },
                {
                  "x": -1.0,
                  "y": 207.408
                },
                {
                  "x": 0.115,
                  "y": 204.847
                },
                {
                  "x": 1.52,
                  "y": 202.024
                },
                {
                  "x": 3.125,
                  "y": 199.125
                },
                {
                  "x": 4.84,
                  "y": 196.336
                },
                {
                  "x": 6.575,
                  "y": 193.843
                },
                {
                  "x": 8.24,
                  "y": 191.832
                },
                {
                  "x": 9.745,
                  "y": 190.489
                },
                {
                  "x": 11.0,
                  "y": 190.0
                }
              ]
            }
          ]
        },
        {
          "type": "turn_right",
          "startRoad": "road_1_4_3",
          "endRoad": "road_1_3_2",
          "direction": 3,
          "laneLinks": [
            {
              "startLaneIndex": 2,
              "endLaneIndex": 0,
              "points": [
                {
                  "x": -10.0,
                  "y": 211.0
                },
                {
                  "x": -9.929,
                  "y": 209.857
                },
                {
                  "x": -9.752,
                  "y": 208.656
                },
                {
                  "x": -9.523,
                  "y": 207.439
                },
                {
                  "x": -9.296,
                  "y": 206.248
                },
                {
                  "x": -9.125,
                  "y": 205.125
                },
                {
                  "x": -9.064,
                  "y": 204.112
                },
                {
                  "x": -9.167,
                  "y": 203.251
                },
                {
                  "x": -9.488,
                  "y": 202.584
                },
                {
                  "x": -10.081,
                  "y": 202.153
                },
                {
                  "x": -11.0,
                  "y": 202.0
                }
              ]
            },
            {
              "startLaneIndex": 2,
              "endLaneIndex": 1,
              "points": [
                {
                  "x": -10.0,
                  "y": 211.0
                },
                {
                  "x": -9.929,
                  "y": 209.969
                },
                {
                  "x": -9.752,
                  "y": 209.072
                },
                {
                  "x": -9.523,
                  "y": 208.303
                },
                {
                  "x": -9.296,
                  "y": 207.656
                },
                {
                  "x": -9.125,
                  "y": 207.125
                },
                {
                  "x": -9.064,
                  "y": 206.704
                },
                {
                  "x": -9.167,
                  "y": 206.387
                },
                {
                  "x": -9.488,
                  "y": 206.168
                },
                {
                  "x": -10.081,
                  "y": 206.041
                },
                {
                  "x": -11.0,
                  "y": 206.0
                }
              ]
            },
            {
              "startLaneIndex": 2,
              "endLaneIndex": 2,
              "points": [
                {
                  "x": -10.0,
                  "y": 211.0
                },
                {
                  "x": -9.929,
                  "y": 210.081
                },
                {
                  "x": -9.752,
                  "y": 209.488
                },
                {
                  "x": -9.523,
                  "y": 209.167
                },
                {
                  "x": -9.296,
                  "y": 209.064
                },
                {
                  "x": -9.125,
                  "y": 209.125
                },
                {
                  "x": -9.064,
                  "y": 209.296
                },
                {
                  "x": -9.167,
                  "y": 209.523
                },
                {
                  "x": -9.488,
                  "y": 209.752
                },
                {
                  "x": -10.081,
                  "y": 209.929
                },
                {
                  "x": -11.0,
                  "y": 210.0
                }
              ]
            }
          ]
        },
        {
          "type": "go_straight",
          "startRoad": "road_1_4_3",
          "endRoad": "road_1_3_3",
          "direction": 3,
          "laneLinks": [
            {
              "startLaneIndex": 1,
              "endLaneIndex": 0,
              "points": [
                {
                  "x": -6.0,
                  "y": 211.0
                },
                {
                  "x": -5.888,
                  "y": 209.59199999999998
                },
                {
                  "x": -5.584,
                  "y": 207.656
                },
                {
                  "x": -5.136,
                  "y": 205.324
                },
                {
                  "x": -4.592,
                  "y": 202.728
                },
                {
                  "x": -4.0,
                  "y": 200.0
                },
                {
                  "x": -3.408,
                  "y": 197.272
                },
                {
                  "x": -2.864,
                  "y": 194.676
                },
                {
                  "x": -2.415999999999999,
                  "y": 192.344
                },
                {
                  "x": -2.112,
                  "y": 190.408
                },
                {
                  "x": -2.0,
                  "y": 189.0
                }
              ]
            },
            {
              "startLaneIndex": 1,
              "endLaneIndex": 1,
              "points": [
                {
                  "x": -6.0,
                  "y": 211.0
                },
                {
                  "x": -6.0,
                  "y": 209.59199999999998
                },
                {
                  "x": -6.0,
                  "y": 207.656
                },
                {
                  "x": -6.0,
                  "y": 205.324
                },
                {
                  "x": -6.0,
                  "y": 202.728
                },
                {
                  "x": -6.0,
                  "y": 200.0
                },
                {
                  "x": -6.0,
                  "y": 197.272
                },
                {
                  "x": -6.0,
                  "y": 194.676
                },
                {
                  "x": -5.999999999999999,
                  "y": 192.344
                },
                {
                  "x": -6.0,
                  "y": 190.408
                },
                {
                  "x": -6.0,
                  "y": 189.0
                }
              ]
            },
            {
              "startLaneIndex": 1,
              "endLaneIndex": 2,
              "points": [
                {
                  "x": -6.0,
                  "y": 211.0
                },
                {
                  "x": -6.112,
                  "y": 209.59199999999998
                },
                {
                  "x": -6.416,
                  "y": 207.656
                },
                {
                  "x": -6.864,
                  "y": 205.324
                },
                {
                  "x": -7.408,
                  "y": 202.728
                },
                {
                  "x": -8.0,
                  "y": 200.0
                },
                {
                  "x": -8.592,
                  "y": 197.272
                },
                {
                  "x": -9.136,
                  "y": 194.676
                },
                {
                  "x": -9.584,
                  "y": 192.344
                },
                {
                  "x": -9.888,
                  "y": 190.408
                },
                {
                  "x": -10.0,
                  "y": 189.0
                }
              ]
            }
          ]
        }
      ],
      "trafficLight": {
        "roadLinkIndices": [
          0,
          1,
          2,
          3,
          4,
          5,
          6,
          7,
          8,
          9,
          10,
          11
        ],
        "lightphases": [
          {
            "time": 5,
            "availableRoadLinks": [
              10,
              2,
              3,
              6
            ]
          },
          {
            "time": 30,
            "availableRoadLinks": [
              0,
              2,
              3,
              6,
              7,
              10
            ]
          },
          {
            "time": 30,
            "availableRoadLinks": [
              2,
              3,
              4,
              6,
              10,
              11
            ]
          },
          {
            "time": 30,
            "availableRoadLinks": [
              1,
              2,
              3,
              6,
              8,
              10
            ]
          },
          {
            "time": 30,
            "availableRoadLinks": [
              2,
              3,
              5,
              6,
              9,
              10
            ]
          },
          {
            "time": 30,
            "availableRoadLinks": [
              0,
              1,
              2,
              3,
              6,
              10
            ]
          },
          {
            "time": 30,
            "availableRoadLinks": [
              2,
              3,
              6,
              7,
              8,
              10
            ]
          },
          {
            "time": 30,
            "availableRoadLinks": [
              2,
              3,
              4,
              5,
              6,
              10
            ]
          },
          {
            "time": 30,
            "availableRoadLinks": [
              2,
              3,
              6,
              9,
              10,
              11
            ]
          }
        ]
      },
      "virtual": false
    },
    {
      "id": "intersection_1_4",
      "point": {
        "x": 0,
        "y": 300
      },
      "width": 11,
      "roads": [
        "road_0_4_0",
        "road_1_3_1",
        "road_2_4_2",
        "road_1_5_3",
        "road_1_4_0",
        "road_1_4_1",
        "road_1_4_2",
        "road_1_4_3"
      ],
      "roadLinks": [
        {
          "type": "go_straight",
          "startRoad": "road_0_4_0",
          "endRoad": "road_1_4_0",
          "direction": 0,
          "laneLinks": [
            {
              "startLaneIndex": 1,
              "endLaneIndex": 0,
              "points": [
                {
                  "x": -11.0,
                  "y": 294.0
                },
                {
                  "x": -9.592,
                  "y": 294.112
                },
                {
                  "x": -7.656,
                  "y": 294.416
                },
                {
                  "x": -5.324,
                  "y": 294.864
                },
                {
                  "x": -2.7279999999999998,
                  "y": 295.408
                },
                {
                  "x": 0.0,
                  "y": 296.0
                },
                {
                  "x": 2.7279999999999998,
                  "y": 296.592
                },
                {
                  "x": 5.323999999999999,
                  "y": 297.136
                },
                {
                  "x": 7.655999999999999,
                  "y": 297.584
                },
                {
                  "x": 9.592,
                  "y": 297.888
                },
                {
                  "x": 11.0,
                  "y": 298.0
                }
              ]
            },
            {
              "startLaneIndex": 1,
              "endLaneIndex": 1,
              "points": [
                {
                  "x": -11.0,
                  "y": 294.0
                },
                {
                  "x": -9.592,
                  "y": 294.0
                },
                {
                  "x": -7.656,
                  "y": 294.0
                },
                {
                  "x": -5.324,
                  "y": 294.0
                },
                {
                  "x": -2.7279999999999998,
                  "y": 294.0
                },
                {
                  "x": 0.0,
                  "y": 294.0
                },
                {
                  "x": 2.7279999999999998,
                  "y": 294.0
                },
                {
                  "x": 5.323999999999999,
                  "y": 294.0
                },
                {
                  "x": 7.655999999999999,
                  "y": 294.0
                },
                {
                  "x": 9.592,
                  "y": 294.0
                },
                {
                  "x": 11.0,
                  "y": 294.0
                }
              ]
            },
            {
              "startLaneIndex": 1,
              "endLaneIndex": 2,
              "points": [
                {
                  "x": -11.0,
                  "y": 294.0
                },
                {
                  "x": -9.592,
                  "y": 293.888
                },
                {
                  "x": -7.656,
                  "y": 293.584
                },
                {
                  "x": -5.324,
                  "y": 293.136
                },
                {
                  "x": -2.7279999999999998,
                  "y": 292.592
                },
                {
                  "x": 0.0,
                  "y": 292.0
                },
                {
                  "x": 2.7279999999999998,
                  "y": 291.408
                },
                {
                  "x": 5.323999999999999,
                  "y": 290.864
                },
                {
                  "x": 7.655999999999999,
                  "y": 290.416
                },
                {
                  "x": 9.592,
                  "y": 290.112
                },
                {
                  "x": 11.0,
                  "y": 290.0
                }
              ]
            }
          ]
        },
        {
          "type": "turn_left",
          "startRoad": "road_0_4_0",
          "endRoad": "road_1_4_1",
          "direction": 0,
          "laneLinks": [
            {
              "startLaneIndex": 0,
              "endLaneIndex": 0,
              "points": [
                {
                  "x": -11.0,
                  "y": 298.0
                },
                {
                  "x": -9.745,
                  "y": 298.265
                },
                {
                  "x": -8.24,
                  "y": 299.0
                },
                {
                  "x": -6.575,
                  "y": 300.115
                },
                {
                  "x": -4.84,
                  "y": 301.52
                },
                {
                  "x": -3.125,
                  "y": 303.125
                },
                {
                  "x": -1.52,
                  "y": 304.84
                },
                {
                  "x": -0.115000000000001,
                  "y": 306.575
                },
                {
                  "x": 0.999999999999999,
                  "y": 308.24
                },
                {
                  "x": 1.735,
                  "y": 309.745
                },
                {
                  "x": 2.0,
                  "y": 311.0
                }
              ]
            },
            {
              "startLaneIndex": 0,
              "endLaneIndex": 1,
              "points": [
                {
                  "x": -11.0,
                  "y": 298.0
                },
                {
                  "x": -9.633,
                  "y": 298.265
                },
                {
                  "x": -7.824,
                  "y": 299.0
                },
                {
                  "x": -5.711,
                  "y": 300.115
                },
                {
                  "x": -3.432,
                  "y": 301.52
                },
                {
                  "x": -1.125,
                  "y": 303.125
                },
                {
                  "x": 1.072,
                  "y": 304.84
                },
                {
                  "x": 3.020999999999999,
                  "y": 306.575
                },
                {
                  "x": 4.583999999999999,
                  "y": 308.24
                },
                {
                  "x": 5.623,
                  "y": 309.745
                },
                {
                  "x": 6.0,
                  "y": 311.0
                }
              ]
            },
            {
              "startLaneIndex": 0,
              "endLaneIndex": 2,
              "points": [
                {
                  "x": -11.0,
                  "y": 298.0
                },
                {
                  "x": -9.521,
                  "y": 298.265
                },
                {
                  "x": -7.408,
                  "y": 299.0
                },
                {
                  "x": -4.8469999999999995,
                  "y": 300.115
                },
                {
                  "x": -2.024,
                  "y": 301.52
                },
                {
                  "x": 0.875,
                  "y": 303.125
                },
                {
                  "x": 3.664,
                  "y": 304.84
                },
                {
                  "x": 6.156999999999999,
                  "y": 306.575
                },
                {
                  "x": 8.168,
                  "y": 308.24
                },
                {
                  "x": 9.511,
                  "y": 309.745
                },
                {
                  "x": 10.0,
                  "y": 311.0
                }
              ]
            }
          ]
        },
        {
          "type": "turn_right",
          "startRoad": "road_0_4_0",
          "endRoad": "road_1_4_3",
          "direction": 0,
          "laneLinks": [
            {
              "startLaneIndex": 2,
              "endLaneIndex": 0,
              "points": [
                {
                  "x": -11.0,
                  "y": 290.0
                },
                {
                  "x": -9.857,
                  "y": 290.071
                },
                {
                  "x": -8.656,
                  "y": 290.248
                },
                {
                  "x": -7.439,
                  "y": 290.477
                },
                {
                  "x": -6.248,
                  "y": 290.704
                },
                {
                  "x": -5.125,
                  "y": 290.875
                },
                {
                  "x": -4.112,
                  "y": 290.936
                },
                {
                  "x": -3.251000000000001,
                  "y": 290.83299999999997
                },
                {
                  "x": -2.584000000000001,
                  "y": 290.512
                },
                {
                  "x": -2.153,
                  "y": 289.919
                },
                {
                  "x": -2.0,
                  "y": 289.0
                }
              ]
            },
            {
              "startLaneIndex": 2,
              "endLaneIndex": 1,
              "points": [
                {
                  "x": -11.0,
                  "y": 290.0
                },
                {
                  "x": -9.969,
                  "y": 290.071
                },
                {
                  "x": -9.072,
                  "y": 290.248
                },
                {
                  "x": -8.303,
                  "y": 290.477
                },
                {
                  "x": -7.656,
                  "y": 290.704
                },
                {
                  "x": -7.125,
                  "y": 290.875
                },
                {
                  "x": -6.704,
                  "y": 290.936
                },
                {
                  "x": -6.387000000000001,
                  "y": 290.83299999999997
                },
                {
                  "x": -6.168000000000001,
                  "y": 290.512
                },
                {
                  "x": -6.0409999999999995,
                  "y": 289.919
                },
                {
                  "x": -6.0,
                  "y": 289.0
                }
              ]
            },
            {
              "startLaneIndex": 2,
              "endLaneIndex": 2,
              "points": [
                {
                  "x": -11.0,
                  "y": 290.0
                },
                {
                  "x": -10.081,
                  "y": 290.071
                },
                {
                  "x": -9.488,
                  "y": 290.248
                },
                {
                  "x": -9.167,
                  "y": 290.477
                },
                {
                  "x": -9.064,
                  "y": 290.704
                },
                {
                  "x": -9.125,
                  "y": 290.875
                },
                {
                  "x": -9.296,
                  "y": 290.936
                },
                {
                  "x": -9.523000000000001,
                  "y": 290.83299999999997
                },
                {
                  "x": -9.752,
                  "y": 290.512
                },
                {
                  "x": -9.929,
                  "y": 289.919
                },
                {
                  "x": -10.0,
                  "y": 289.0
                }
              ]
            }
          ]
        },
        {
          "type": "turn_right",
          "startRoad": "road_1_3_1",
          "endRoad": "road_1_4_0",
          "direction": 1,
          "laneLinks": [
            {
              "startLaneIndex": 2,
              "endLaneIndex": 0,
              "points": [
                {
                  "x": 10.0,
                  "y": 289.0
                },
                {
                  "x": 9.929,
                  "y": 290.143
                },
                {
                  "x": 9.752,
                  "y": 291.344
                },
                {
                  "x": 9.523,
                  "y": 292.561
                },
                {
                  "x": 9.296,
                  "y": 293.752
                },
                {
                  "x": 9.125,
                  "y": 294.875
                },
                {
                  "x": 9.064,
                  "y": 295.888
                },
                {
                  "x": 9.167,
                  "y": 296.749
                },
                {
                  "x": 9.488,
                  "y": 297.416
                },
                {
                  "x": 10.081,
                  "y": 297.847
                },
                {
                  "x": 11.0,
                  "y": 298.0
                }
              ]
            },
            {
              "startLaneIndex": 2,
              "endLaneIndex": 1,
              "points": [
                {
                  "x": 10.0,
                  "y": 289.0
                },
                {
                  "x": 9.929,
                  "y": 290.031
                },
                {
                  "x": 9.752,
                  "y": 290.928
                },
                {
                  "x": 9.523,
                  "y": 291.697
                },
                {
                  "x": 9.296,
                  "y": 292.344
                },
                {
                  "x": 9.125,
                  "y": 292.875
                },
                {
                  "x": 9.064,
                  "y": 293.296
                },
                {
                  "x": 9.167,
                  "y": 293.613
                },
                {
                  "x": 9.488,
                  "y": 293.832
                },
                {
                  "x": 10.081,
                  "y": 293.959
                },
                {
                  "x": 11.0,
                  "y": 294.0
                }
              ]
            },
            {
              "startLaneIndex": 2,
              "endLaneIndex": 2,
              "points": [
                {
                  "x": 10.0,
                  "y": 289.0
                },
                {
                  "x": 9.929,
                  "y": 289.919
                },
                {
                  "x": 9.752,
                  "y": 290.512
                },
                {
                  "x": 9.523,
                  "y": 290.83299999999997
                },
                {
                  "x": 9.296,
                  "y": 290.936
                },
                {
                  "x": 9.125,
                  "y": 290.875
                },
                {
                  "x": 9.064,
                  "y": 290.704
                },
                {
                  "x": 9.167,
                  "y": 290.477
                },
                {
                  "x": 9.488,
                  "y": 290.248
                },
                {
                  "x": 10.081,
                  "y": 290.071
                },
                {
                  "x": 11.0,
                  "y": 290.0
                }
              ]
            }
          ]
        },
        {
          "type": "go_straight",
          "startRoad": "road_1_3_1",
          "endRoad": "road_1_4_1",
          "direction": 1,
          "laneLinks": [
            {
              "startLaneIndex": 1,
              "endLaneIndex": 0,
              "points": [
                {
                  "x": 6.0,
                  "y": 289.0
                },
                {
                  "x": 5.888,
                  "y": 290.408
                },
                {
                  "x": 5.584,
                  "y": 292.344
                },
                {
                  "x": 5.136,
                  "y": 294.676
                },
                {
                  "x": 4.592,
                  "y": 297.272
                },
                {
                  "x": 4.0,
                  "y": 300.0
                },
                {
                  "x": 3.408,
                  "y": 302.728
                },
                {
                  "x": 2.864,
                  "y": 305.324
                },
                {
                  "x": 2.415999999999999,
                  "y": 307.656
                },
                {
                  "x": 2.112,
                  "y": 309.592
                },
                {
                  "x": 2.0,
                  "y": 311.0
                }
              ]
            },
            {
              "startLaneIndex": 1,
              "endLaneIndex": 1,
              "points": [
                {
                  "x": 6.0,
                  "y": 289.0
                },
                {
                  "x": 6.0,
                  "y": 290.408
                },
                {
                  "x": 6.0,
                  "y": 292.344
                },
                {
                  "x": 6.0,
                  "y": 294.676
                },
                {
                  "x": 6.0,
                  "y": 297.272
                },
                {
                  "x": 6.0,
                  "y": 300.0
                },
                {
                  "x": 6.0,
                  "y": 302.728
                },
                {
                  "x": 6.0,
                  "y": 305.324
                },
                {
                  "x": 5.999999999999999,
                  "y": 307.656
                },
                {
                  "x": 6.0,
                  "y": 309.592
                },
                {
                  "x": 6.0,
                  "y": 311.0
                }
              ]
            },
            {
              "startLaneIndex": 1,
              "endLaneIndex": 2,
              "points": [
                {
                  "x": 6.0,
                  "y": 289.0
                },
                {
                  "x": 6.112,
                  "y": 290.408
                },
                {
                  "x": 6.416,
                  "y": 292.344
                },
                {
                  "x": 6.864,
                  "y": 294.676
                },
                {
                  "x": 7.408,
                  "y": 297.272
                },
                {
                  "x": 8.0,
                  "y": 300.0
                },
                {
                  "x": 8.592,
                  "y": 302.728
                },
                {
                  "x": 9.136,
                  "y": 305.324
                },
                {
                  "x": 9.584,
                  "y": 307.656
                },
                {
                  "x": 9.888,
                  "y": 309.592
                },
                {
                  "x": 10.0,
                  "y": 311.0
                }
              ]
            }
          ]
        },
        {
          "type": "turn_left",
          "startRoad": "road_1_3_1",
          "endRoad": "road_1_4_2",
          "direction": 1,
          "laneLinks": [
            {
              "startLaneIndex": 0,
              "endLaneIndex": 0,
              "points": [
                {
                  "x": 2.0,
                  "y": 289.0
                },
                {
                  "x": 1.7349999999999999,
                  "y": 290.255
                },
                {
                  "x": 1.0,
                  "y": 291.76
                },
                {
                  "x": -0.115,
                  "y": 293.425
                },
                {
                  "x": -1.52,
                  "y": 295.15999999999997
                },
                {
                  "x": -3.125,
                  "y": 296.875
                },
                {
                  "x": -4.84,
                  "y": 298.48
                },
                {
                  "x": -6.575,
                  "y": 299.885
                },
                {
                  "x": -8.24,
                  "y": 301.0
                },
                {
                  "x": -9.745,
                  "y": 301.735
                },
                {
                  "x": -11.0,
                  "y": 302.0
                }
              ]
            },
            {
              "startLaneIndex": 0,
              "endLaneIndex": 1,
              "points": [
                {
                  "x": 2.0,
                  "y": 289.0
                },
                {
                  "x": 1.7349999999999999,
                  "y": 290.367
                },
                {
                  "x": 1.0,
                  "y": 292.176
                },
                {
                  "x": -0.115,
                  "y": 294.289
                },
                {
                  "x": -1.52,
                  "y": 296.568
                },
                {
                  "x": -3.125,
                  "y": 298.875
                },
                {
                  "x": -4.84,
                  "y": 301.072
                },
                {
                  "x": -6.575,
                  "y": 303.021
                },
                {
                  "x": -8.24,
                  "y": 304.584
                },
                {
                  "x": -9.745,
                  "y": 305.623
                },
                {
                  "x": -11.0,
                  "y": 306.0
                }
              ]
            },
            {
              "startLaneIndex": 0,
              "endLaneIndex": 2,
              "points": [
                {
                  "x": 2.0,
                  "y": 289.0
                },
                {
                  "x": 1.7349999999999999,
                  "y": 290.479
                },
                {
                  "x": 1.0,
                  "y": 292.592
                },
                {
                  "x": -0.115,
                  "y": 295.153
                },
                {
                  "x": -1.52,
                  "y": 297.976
                },
                {
                  "x": -3.125,
                  "y": 300.875
                },
                {
                  "x": -4.84,
                  "y": 303.664
                },
                {
                  "x": -6.575,
                  "y": 306.157
                },
                {
                  "x": -8.24,
                  "y": 308.168
                },
                {
                  "x": -9.745,
                  "y": 309.511
                },
                {
                  "x": -11.0,
                  "y": 310.0
                }
              ]
            }
          ]
        },
        {
          "type": "turn_right",
          "startRoad": "road_2_4_2",
          "endRoad": "road_1_4_1",
          "direction": 2,
          "laneLinks": [
            {
              "startLaneIndex": 2,
              "endLaneIndex": 0,
              "points": [
                {
                  "x": 11.0,
                  "y": 310.0
                },
                {
                  "x": 9.857,
                  "y": 309.929
                },
                {
                  "x": 8.656,
                  "y": 309.752
                },
                {
                  "x": 7.439,
                  "y": 309.523
                },
                {
                  "x": 6.248,
                  "y": 309.296
                },
                {
                  "x": 5.125,
                  "y": 309.125
                },
                {
                  "x": 4.112,
                  "y": 309.064
                },
                {
                  "x": 3.251000000000001,
                  "y": 309.167
                },
                {
                  "x": 2.584000000000001,
                  "y": 309.488
                },
                {
                  "x": 2.153,
                  "y": 310.081
                },
                {
                  "x": 2.0,
                  "y": 311.0
                }
              ]
            },
            {
              "startLaneIndex": 2,
              "endLaneIndex": 1,
              "points": [
                {
                  "x": 11.0,
                  "y": 310.0
                },
                {
                  "x": 9.969,
                  "y": 309.929
                },
                {
                  "x": 9.072,
                  "y": 309.752
                },
                {
                  "x": 8.303,
                  "y": 309.523
                },
                {
                  "x": 7.656,
                  "y": 309.296
                },
                {
                  "x": 7.125,
                  "y": 309.125
                },
                {
                  "x": 6.704,
                  "y": 309.064
                },
                {
                  "x": 6.387000000000001,
                  "y": 309.167
                },
                {
                  "x": 6.168000000000001,
                  "y": 309.488
                },
                {
                  "x": 6.0409999999999995,
                  "y": 310.081
                },
                {
                  "x": 6.0,
                  "y": 311.0
                }
              ]
            },
            {
              "startLaneIndex": 2,
              "endLaneIndex": 2,
              "points": [
                {
                  "x": 11.0,
                  "y": 310.0
                },
                {
                  "x": 10.081,
                  "y": 309.929
                },
                {
                  "x": 9.488,
                  "y": 309.752
                },
                {
                  "x": 9.167,
                  "y": 309.523
                },
                {
                  "x": 9.064,
                  "y": 309.296
                },
                {
                  "x": 9.125,
                  "y": 309.125
                },
                {
                  "x": 9.296,
                  "y": 309.064
                },
                {
                  "x": 9.523000000000001,
                  "y": 309.167
                },
                {
                  "x": 9.752,
                  "y": 309.488
                },
                {
                  "x": 9.929,
                  "y": 310.081
                },
                {
                  "x": 10.0,
                  "y": 311.0
                }
              ]
            }
          ]
        },
        {
          "type": "go_straight",
          "startRoad": "road_2_4_2",
          "endRoad": "road_1_4_2",
          "direction": 2,
          "laneLinks": [
            {
              "startLaneIndex": 1,
              "endLaneIndex": 0,
              "points": [
                {
                  "x": 11.0,
                  "y": 306.0
                },
                {
                  "x": 9.592,
                  "y": 305.888
                },
                {
                  "x": 7.656,
                  "y": 305.584
                },
                {
                  "x": 5.324,
                  "y": 305.136
                },
                {
                  "x": 2.7279999999999998,
                  "y": 304.592
                },
                {
                  "x": 0.0,
                  "y": 304.0
                },
                {
                  "x": -2.7279999999999998,
                  "y": 303.408
                },
                {
                  "x": -5.323999999999999,
                  "y": 302.864
                },
                {
                  "x": -7.655999999999999,
                  "y": 302.416
                },
                {
                  "x": -9.592,
                  "y": 302.112
                },
                {
                  "x": -11.0,
                  "y": 302.0
                }
              ]
            },
            {
              "startLaneIndex": 1,
              "endLaneIndex": 1,
              "points": [
                {
                  "x": 11.0,
                  "y": 306.0
                },
                {
                  "x": 9.592,
                  "y": 306.0
                },
                {
                  "x": 7.656,
                  "y": 306.0
                },
                {
                  "x": 5.324,
                  "y": 306.0
                },
                {
                  "x": 2.7279999999999998,
                  "y": 306.0
                },
                {
                  "x": 0.0,
                  "y": 306.0
                },
                {
                  "x": -2.7279999999999998,
                  "y": 306.0
                },
                {
                  "x": -5.323999999999999,
                  "y": 306.0
                },
                {
                  "x": -7.655999999999999,
                  "y": 306.0
                },
                {
                  "x": -9.592,
                  "y": 306.0
                },
                {
                  "x": -11.0,
                  "y": 306.0
                }
              ]
            },
            {
              "startLaneIndex": 1,
              "endLaneIndex": 2,
              "points": [
                {
                  "x": 11.0,
                  "y": 306.0
                },
                {
                  "x": 9.592,
                  "y": 306.112
                },
                {
                  "x": 7.656,
                  "y": 306.416
                },
                {
                  "x": 5.324,
                  "y": 306.864
                },
                {
                  "x": 2.7279999999999998,
                  "y": 307.408
                },
                {
                  "x": 0.0,
                  "y": 308.0
                },
                {
                  "x": -2.7279999999999998,
                  "y": 308.592
                },
                {
                  "x": -5.323999999999999,
                  "y": 309.136
                },
                {
                  "x": -7.655999999999999,
                  "y": 309.584
                },
                {
                  "x": -9.592,
                  "y": 309.88800000000003
                },
                {
                  "x": -11.0,
                  "y": 310.0
                }
              ]
            }
          ]
        },
        {
          "type": "turn_left",
          "startRoad": "road_2_4_2",
          "endRoad": "road_1_4_3",
          "direction": 2,
          "laneLinks": [
            {
              "startLaneIndex": 0,
              "endLaneIndex": 0,
              "points": [
                {
                  "x": 11.0,
                  "y": 302.0
                },
                {
                  "x": 9.745,
                  "y": 301.735
                },
                {
                  "x": 8.24,
                  "y": 301.0
                },
                {
                  "x": 6.575,
                  "y": 299.885
                },
                {
                  "x": 4.84,
                  "y": 298.48
                },
                {
                  "x": 3.125,
                  "y": 296.875
                },
                {
                  "x": 1.52,
                  "y": 295.15999999999997
                },
                {
                  "x": 0.115000000000001,
                  "y": 293.425
                },
                {
                  "x": -0.999999999999999,
                  "y": 291.76
                },
                {
                  "x": -1.735,
                  "y": 290.255
                },
                {
                  "x": -2.0,
                  "y": 289.0
                }
              ]
            },
            {
              "startLaneIndex": 0,
              "endLaneIndex": 1,
              "points": [
                {
                  "x": 11.0,
                  "y": 302.0
                },
                {
                  "x": 9.633,
                  "y": 301.735
                },
                {
                  "x": 7.824,
                  "y": 301.0
                },
                {
                  "x": 5.711,
                  "y": 299.885
                },
                {
                  "x": 3.432,
                  "y": 298.48
                },
                {
                  "x": 1.125,
                  "y": 296.875
                },
                {
                  "x": -1.072,
                  "y": 295.15999999999997
                },
                {
                  "x": -3.020999999999999,
                  "y": 293.425
                },
                {
                  "x": -4.583999999999999,
                  "y": 291.76
                },
                {
                  "x": -5.623,
                  "y": 290.255
                },
                {
                  "x": -6.0,
                  "y": 289.0
                }
              ]
            },
            {
              "startLaneIndex": 0,
              "endLaneIndex": 2,
              "points": [
                {
                  "x": 11.0,
                  "y": 302.0
                },
                {
                  "x": 9.521,
                  "y": 301.735
                },
                {
                  "x": 7.408,
                  "y": 301.0
                },
                {
                  "x": 4.8469999999999995,
                  "y": 299.885
                },
                {
                  "x": 2.024,
                  "y": 298.48
                },
                {
                  "x": -0.875,
                  "y": 296.875
                },
                {
                  "x": -3.664,
                  "y": 295.15999999999997
                },
                {
                  "x": -6.156999999999999,
                  "y": 293.425
                },
                {
                  "x": -8.168,
                  "y": 291.76
                },
                {
                  "x": -9.511,
                  "y": 290.255
                },
                {
                  "x": -10.0,
                  "y": 289.0
                }
              ]
            }
          ]
        },
        {
          "type": "turn_left",
          "startRoad": "road_1_5_3",
          "endRoad": "road_1_4_0",
          "direction": 3,
          "laneLinks": [
            {
              "startLaneIndex": 0,
              "endLaneIndex": 0,
              "points": [
                {
                  "x": -2.0,
                  "y": 311.0
                },
                {
                  "x": -1.7349999999999999,
                  "y": 309.745
                },
                {
                  "x": -1.0,
                  "y": 308.24
                },
                {
                  "x": 0.115,
                  "y": 306.575
                },
                {
                  "x": 1.52,
                  "y": 304.84
                },
                {
                  "x": 3.125,
                  "y": 303.125
                },
                {
                  "x": 4.84,
                  "y": 301.52
                },
                {
                  "x": 6.575,
                  "y": 300.115
                },
                {
                  "x": 8.24,
                  "y": 299.0
                },
                {
                  "x": 9.745,
                  "y": 298.265
                },
                {
                  "x": 11.0,
                  "y": 298.0
                }
              ]
            },
            {
              "startLaneIndex": 0,
              "endLaneIndex": 1,
              "points": [
                {
                  "x": -2.0,
                  "y": 311.0
                },
                {
                  "x": -1.7349999999999999,
                  "y": 309.633
                },
                {
                  "x": -1.0,
                  "y": 307.824
                },
                {
                  "x": 0.115,
                  "y": 305.711
                },
                {
                  "x": 1.52,
                  "y": 303.432
                },
                {
                  "x": 3.125,
                  "y": 301.125
                },
                {
                  "x": 4.84,
                  "y": 298.928
                },
                {
                  "x": 6.575,
                  "y": 296.979
                },
                {
                  "x": 8.24,
                  "y": 295.416
                },
                {
                  "x": 9.745,
                  "y": 294.377
                },
                {
                  "x": 11.0,
                  "y": 294.0
                }
              ]
            },
            {
              "startLaneIndex": 0,
              "endLaneIndex": 2,
              "points": [
                {
                  "x": -2.0,
                  "y": 311.0
                },
                {
                  "x": -1.7349999999999999,
                  "y": 309.521
                },
                {
                  "x": -1.0,
                  "y": 307.408
                },
                {
                  "x": 0.115,
                  "y": 304.847
                },
                {
                  "x": 1.52,
                  "y": 302.024
                },
                {
                  "x": 3.125,
                  "y": 299.125
                },
                {
                  "x": 4.84,
                  "y": 296.336
                },
                {
                  "x": 6.575,
                  "y": 293.843
                },
                {
                  "x": 8.24,
                  "y": 291.832
                },
                {
                  "x": 9.745,
                  "y": 290.48900000000003
                },
                {
                  "x": 11.0,
                  "y": 290.0
                }
              ]
            }
          ]
        },
        {
          "type": "turn_right",
          "startRoad": "road_1_5_3",
          "endRoad": "road_1_4_2",
          "direction": 3,
          "laneLinks": [
            {
              "startLaneIndex": 2,
              "endLaneIndex": 0,
              "points": [
                {
                  "x": -10.0,
                  "y": 311.0
                },
                {
                  "x": -9.929,
                  "y": 309.85699999999997
                },
                {
                  "x": -9.752,
                  "y": 308.656
                },
                {
                  "x": -9.523,
                  "y": 307.439
                },
                {
                  "x": -9.296,
                  "y": 306.248
                },
                {
                  "x": -9.125,
                  "y": 305.125
                },
                {
                  "x": -9.064,
                  "y": 304.112
                },
                {
                  "x": -9.167,
                  "y": 303.251
                },
                {
                  "x": -9.488,
                  "y": 302.584
                },
                {
                  "x": -10.081,
                  "y": 302.153
                },
                {
                  "x": -11.0,
                  "y": 302.0
                }
              ]
            },
            {
              "startLaneIndex": 2,
              "endLaneIndex": 1,
              "points": [
                {
                  "x": -10.0,
                  "y": 311.0
                },
                {
                  "x": -9.929,
                  "y": 309.969
                },
                {
                  "x": -9.752,
                  "y": 309.072
                },
                {
                  "x": -9.523,
                  "y": 308.303
                },
                {
                  "x": -9.296,
                  "y": 307.656
                },
                {
                  "x": -9.125,
                  "y": 307.125
                },
                {
                  "x": -9.064,
                  "y": 306.704
                },
                {
                  "x": -9.167,
                  "y": 306.387
                },
                {
                  "x": -9.488,
                  "y": 306.168
                },
                {
                  "x": -10.081,
                  "y": 306.041
                },
                {
                  "x": -11.0,
                  "y": 306.0
                }
              ]
            },
            {
              "startLaneIndex": 2,
              "endLaneIndex": 2,
              "points": [
                {
                  "x": -10.0,
                  "y": 311.0
                },
                {
                  "x": -9.929,
                  "y": 310.081
                },
                {
                  "x": -9.752,
                  "y": 309.488
                },
                {
                  "x": -9.523,
                  "y": 309.167
                },
                {
                  "x": -9.296,
                  "y": 309.064
                },
                {
                  "x": -9.125,
                  "y": 309.125
                },
                {
                  "x": -9.064,
                  "y": 309.296
                },
                {
                  "x": -9.167,
                  "y": 309.523
                },
                {
                  "x": -9.488,
                  "y": 309.752
                },
                {
                  "x": -10.081,
                  "y": 309.92900000000003
                },
                {
                  "x": -11.0,
                  "y": 310.0
                }
              ]
            }
          ]
        },
        {
          "type": "go_straight",
          "startRoad": "road_1_5_3",
          "endRoad": "road_1_4_3",
          "direction": 3,
          "laneLinks": [
            {
              "startLaneIndex": 1,
              "endLaneIndex": 0,
              "points": [
                {
                  "x": -6.0,
                  "y": 311.0
                },
                {
                  "x": -5.888,
                  "y": 309.592
                },
                {
                  "x": -5.584,
                  "y": 307.656
                },
                {
                  "x": -5.136,
                  "y": 305.324
                },
                {
                  "x": -4.592,
                  "y": 302.728
                },
                {
                  "x": -4.0,
                  "y": 300.0
                },
                {
                  "x": -3.408,
                  "y": 297.272
                },
                {
                  "x": -2.864,
                  "y": 294.676
                },
                {
                  "x": -2.415999999999999,
                  "y": 292.344
                },
                {
                  "x": -2.112,
                  "y": 290.408
                },
                {
                  "x": -2.0,
                  "y": 289.0
                }
              ]
            },
            {
              "startLaneIndex": 1,
              "endLaneIndex": 1,
              "points": [
                {
                  "x": -6.0,
                  "y": 311.0
                },
                {
                  "x": -6.0,
                  "y": 309.592
                },
                {
                  "x": -6.0,
                  "y": 307.656
                },
                {
                  "x": -6.0,
                  "y": 305.324
                },
                {
                  "x": -6.0,
                  "y": 302.728
                },
                {
                  "x": -6.0,
                  "y": 300.0
                },
                {
                  "x": -6.0,
                  "y": 297.272
                },
                {
                  "x": -6.0,
                  "y": 294.676
                },
                {
                  "x": -5.999999999999999,
                  "y": 292.344
                },
                {
                  "x": -6.0,
                  "y": 290.408
                },
                {
                  "x": -6.0,
                  "y": 289.0
                }
              ]
            },
            {
              "startLaneIndex": 1,
              "endLaneIndex": 2,
              "points": [
                {
                  "x": -6.0,
                  "y": 311.0
                },
                {
                  "x": -6.112,
                  "y": 309.592
                },
                {
                  "x": -6.416,
                  "y": 307.656
                },
                {
                  "x": -6.864,
                  "y": 305.324
                },
                {
                  "x": -7.408,
                  "y": 302.728
                },
                {
                  "x": -8.0,
                  "y": 300.0
                },
                {
                  "x": -8.592,
                  "y": 297.272
                },
                {
                  "x": -9.136,
                  "y": 294.676
                },
                {
                  "x": -9.584,
                  "y": 292.344
                },
                {
                  "x": -9.888,
                  "y": 290.408
                },
                {
                  "x": -10.0,
                  "y": 289.0
                }
              ]
            }
          ]
        }
      ],
      "trafficLight": {
        "roadLinkIndices": [
          0,
          1,
          2,
          3,
          4,
          5,
          6,
          7,
          8,
          9,
          10,
          11
        ],
        "lightphases": [
          {
            "time": 5,
            "availableRoadLinks": [
              10,
              2,
              3,
              6
            ]
          },
          {
            "time": 30,
            "availableRoadLinks": [
              0,
              2,
              3,
              6,
              7,
              10
            ]
          },
          {
            "time": 30,
            "availableRoadLinks": [
              2,
              3,
              4,
              6,
              10,
              11
            ]
          },
          {
            "time": 30,
            "availableRoadLinks": [
              1,
              2,
              3,
              6,
              8,
              10
            ]
          },
          {
            "time": 30,
            "availableRoadLinks": [
              2,
              3,
              5,
              6,
              9,
              10
            ]
          },
          {
            "time": 30,
            "availableRoadLinks": [
              0,
              1,
              2,
              3,
              6,
              10
            ]
          },
          {
            "time": 30,
            "availableRoadLinks": [
              2,
              3,
              6,
              7,
              8,
              10
            ]
          },
          {
            "time": 30,
            "availableRoadLinks": [
              2,
              3,
              4,
              5,
              6,
              10
            ]
          },
          {
            "time": 30,
            "availableRoadLinks": [
              2,
              3,
              6,
              9,
              10,
              11
            ]
          }
        ]
      },
      "virtual": false
    },
    {
      "id": "intersection_1_5",
      "point": {
        "x": 0,
        "y": 400
      },
      "width": 11,
      "roads": [
        "road_0_5_0",
        "road_1_4_1",
        "road_2_5_2",
        "road_1_6_3",
        "road_1_5_0",
        "road_1_5_1",
        "road_1_5_2",
        "road_1_5_3"
      ],
      "roadLinks": [
        {
          "type": "go_straight",
          "startRoad": "road_0_5_0",
          "endRoad": "road_1_5_0",
          "direction": 0,
          "laneLinks": [
            {
              "startLaneIndex": 1,
              "endLaneIndex": 0,
              "points": [
                {
                  "x": -11.0,
                  "y": 394.0
                },
                {
                  "x": -9.592,
                  "y": 394.112
                },
                {
                  "x": -7.656,
                  "y": 394.416
                },
                {
                  "x": -5.324,
                  "y": 394.864
                },
                {
                  "x": -2.7279999999999998,
                  "y": 395.408
                },
                {
                  "x": 0.0,
                  "y": 396.0
                },
                {
                  "x": 2.7279999999999998,
                  "y": 396.592
                },
                {
                  "x": 5.323999999999999,
                  "y": 397.136
                },
                {
                  "x": 7.655999999999999,
                  "y": 397.5839999999999
                },
                {
                  "x": 9.592,
                  "y": 397.888
                },
                {
                  "x": 11.0,
                  "y": 398.0
                }
              ]
            },
            {
              "startLaneIndex": 1,
              "endLaneIndex": 1,
              "points": [
                {
                  "x": -11.0,
                  "y": 394.0
                },
                {
                  "x": -9.592,
                  "y": 394.0
                },
                {
                  "x": -7.656,
                  "y": 394.0
                },
                {
                  "x": -5.324,
                  "y": 394.0
                },
                {
                  "x": -2.7279999999999998,
                  "y": 394.0
                },
                {
                  "x": 0.0,
                  "y": 394.0
                },
                {
                  "x": 2.7279999999999998,
                  "y": 394.0
                },
                {
                  "x": 5.323999999999999,
                  "y": 394.0
                },
                {
                  "x": 7.655999999999999,
                  "y": 393.9999999999999
                },
                {
                  "x": 9.592,
                  "y": 394.0
                },
                {
                  "x": 11.0,
                  "y": 394.0
                }
              ]
            },
            {
              "startLaneIndex": 1,
              "endLaneIndex": 2,
              "points": [
                {
                  "x": -11.0,
                  "y": 394.0
                },
                {
                  "x": -9.592,
                  "y": 393.888
                },
                {
                  "x": -7.656,
                  "y": 393.584
                },
                {
                  "x": -5.324,
                  "y": 393.136
                },
                {
                  "x": -2.7279999999999998,
                  "y": 392.592
                },
                {
                  "x": 0.0,
                  "y": 392.0
                },
                {
                  "x": 2.7279999999999998,
                  "y": 391.408
                },
                {
                  "x": 5.323999999999999,
                  "y": 390.864
                },
                {
                  "x": 7.655999999999999,
                  "y": 390.4159999999999
                },
                {
                  "x": 9.592,
                  "y": 390.112
                },
                {
                  "x": 11.0,
                  "y": 390.0
                }
              ]
            }
          ]
        },
        {
          "type": "turn_left",
          "startRoad": "road_0_5_0",
          "endRoad": "road_1_5_1",
          "direction": 0,
          "laneLinks": [
            {
              "startLaneIndex": 0,
              "endLaneIndex": 0,
              "points": [
                {
                  "x": -11.0,
                  "y": 398.0
                },
                {
                  "x": -9.745,
                  "y": 398.265
                },
                {
                  "x": -8.24,
                  "y": 399.0
                },
                {
                  "x": -6.575,
                  "y": 400.115
                },
                {
                  "x": -4.84,
                  "y": 401.52
                },
                {
                  "x": -3.125,
                  "y": 403.125
                },
                {
                  "x": -1.52,
                  "y": 404.84
                },
                {
                  "x": -0.115000000000001,
                  "y": 406.575
                },
                {
                  "x": 0.999999999999999,
                  "y": 408.2399999999999
                },
                {
                  "x": 1.735,
                  "y": 409.745
                },
                {
                  "x": 2.0,
                  "y": 411.0
                }
              ]
            },
            {
              "startLaneIndex": 0,
              "endLaneIndex": 1,
              "points": [
                {
                  "x": -11.0,
                  "y": 398.0
                },
                {
                  "x": -9.633,
                  "y": 398.265
                },
                {
                  "x": -7.824,
                  "y": 399.0
                },
                {
                  "x": -5.711,
                  "y": 400.115
                },
                {
                  "x": -3.432,
                  "y": 401.52
                },
                {
                  "x": -1.125,
                  "y": 403.125
                },
                {
                  "x": 1.072,
                  "y": 404.84
                },
                {
                  "x": 3.020999999999999,
                  "y": 406.575
                },
                {
                  "x": 4.583999999999999,
                  "y": 408.2399999999999
                },
                {
                  "x": 5.623,
                  "y": 409.745
                },
                {
                  "x": 6.0,
                  "y": 411.0
                }
              ]
            },
            {
              "startLaneIndex": 0,
              "endLaneIndex": 2,
              "points": [
                {
                  "x": -11.0,
                  "y": 398.0
                },
                {
                  "x": -9.521,
                  "y": 398.265
                },
                {
                  "x": -7.408,
                  "y": 399.0
                },
                {
                  "x": -4.8469999999999995,
                  "y": 400.115
                },
                {
                  "x": -2.024,
                  "y": 401.52
                },
                {
                  "x": 0.875,
                  "y": 403.125
                },
                {
                  "x": 3.664,
                  "y": 404.84
                },
                {
                  "x": 6.156999999999999,
                  "y": 406.575
                },
                {
                  "x": 8.168,
                  "y": 408.2399999999999
                },
                {
                  "x": 9.511,
                  "y": 409.745
                },
                {
                  "x": 10.0,
                  "y": 411.0
                }
              ]
            }
          ]
        },
        {
          "type": "turn_right",
          "startRoad": "road_0_5_0",
          "endRoad": "road_1_5_3",
          "direction": 0,
          "laneLinks": [
            {
              "startLaneIndex": 2,
              "endLaneIndex": 0,
              "points": [
                {
                  "x": -11.0,
                  "y": 390.0
                },
                {
                  "x": -9.857,
                  "y": 390.071
                },
                {
                  "x": -8.656,
                  "y": 390.248
                },
                {
                  "x": -7.439,
                  "y": 390.477
                },
                {
                  "x": -6.248,
                  "y": 390.704
                },
                {
                  "x": -5.125,
                  "y": 390.875
                },
                {
                  "x": -4.112,
                  "y": 390.936
                },
                {
                  "x": -3.251000000000001,
                  "y": 390.83299999999997
                },
                {
                  "x": -2.584000000000001,
                  "y": 390.512
                },
                {
                  "x": -2.153,
                  "y": 389.919
                },
                {
                  "x": -2.0,
                  "y": 389.0
                }
              ]
            },
            {
              "startLaneIndex": 2,
              "endLaneIndex": 1,
              "points": [
                {
                  "x": -11.0,
                  "y": 390.0
                },
                {
                  "x": -9.969,
                  "y": 390.071
                },
                {
                  "x": -9.072,
                  "y": 390.248
                },
                {
                  "x": -8.303,
                  "y": 390.477
                },
                {
                  "x": -7.656,
                  "y": 390.704
                },
                {
                  "x": -7.125,
                  "y": 390.875
                },
                {
                  "x": -6.704,
                  "y": 390.936
                },
                {
                  "x": -6.387000000000001,
                  "y": 390.83299999999997
                },
                {
                  "x": -6.168000000000001,
                  "y": 390.512
                },
                {
                  "x": -6.0409999999999995,
                  "y": 389.919
                },
                {
                  "x": -6.0,
                  "y": 389.0
                }
              ]
            },
            {
              "startLaneIndex": 2,
              "endLaneIndex": 2,
              "points": [
                {
                  "x": -11.0,
                  "y": 390.0
                },
                {
                  "x": -10.081,
                  "y": 390.071
                },
                {
                  "x": -9.488,
                  "y": 390.248
                },
                {
                  "x": -9.167,
                  "y": 390.477
                },
                {
                  "x": -9.064,
                  "y": 390.704
                },
                {
                  "x": -9.125,
                  "y": 390.875
                },
                {
                  "x": -9.296,
                  "y": 390.936
                },
                {
                  "x": -9.523000000000001,
                  "y": 390.83299999999997
                },
                {
                  "x": -9.752,
                  "y": 390.512
                },
                {
                  "x": -9.929,
                  "y": 389.919
                },
                {
                  "x": -10.0,
                  "y": 389.0
                }
              ]
            }
          ]
        },
        {
          "type": "turn_right",
          "startRoad": "road_1_4_1",
          "endRoad": "road_1_5_0",
          "direction": 1,
          "laneLinks": [
            {
              "startLaneIndex": 2,
              "endLaneIndex": 0,
              "points": [
                {
                  "x": 10.0,
                  "y": 389.0
                },
                {
                  "x": 9.929,
                  "y": 390.143
                },
                {
                  "x": 9.752,
                  "y": 391.344
                },
                {
                  "x": 9.523,
                  "y": 392.561
                },
                {
                  "x": 9.296,
                  "y": 393.752
                },
                {
                  "x": 9.125,
                  "y": 394.875
                },
                {
                  "x": 9.064,
                  "y": 395.888
                },
                {
                  "x": 9.167,
                  "y": 396.749
                },
                {
                  "x": 9.488,
                  "y": 397.4159999999999
                },
                {
                  "x": 10.081,
                  "y": 397.847
                },
                {
                  "x": 11.0,
                  "y": 398.0
                }
              ]
            },
            {
              "startLaneIndex": 2,
              "endLaneIndex": 1,
              "points": [
                {
                  "x": 10.0,
                  "y": 389.0
                },
                {
                  "x": 9.929,
                  "y": 390.031
                },
                {
                  "x": 9.752,
                  "y": 390.928
                },
                {
                  "x": 9.523,
                  "y": 391.697
                },
                {
                  "x": 9.296,
                  "y": 392.344
                },
                {
                  "x": 9.125,
                  "y": 392.875
                },
                {
                  "x": 9.064,
                  "y": 393.296
                },
                {
                  "x": 9.167,
                  "y": 393.613
                },
                {
                  "x": 9.488,
                  "y": 393.8319999999999
                },
                {
                  "x": 10.081,
                  "y": 393.959
                },
                {
                  "x": 11.0,
                  "y": 394.0
                }
              ]
            },
            {
              "startLaneIndex": 2,
              "endLaneIndex": 2,
              "points": [
                {
                  "x": 10.0,
                  "y": 389.0
                },
                {
                  "x": 9.929,
                  "y": 389.919
                },
                {
                  "x": 9.752,
                  "y": 390.512
                },
                {
                  "x": 9.523,
                  "y": 390.83299999999997
                },
                {
                  "x": 9.296,
                  "y": 390.936
                },
                {
                  "x": 9.125,
                  "y": 390.875
                },
                {
                  "x": 9.064,
                  "y": 390.704
                },
                {
                  "x": 9.167,
                  "y": 390.477
                },
                {
                  "x": 9.488,
                  "y": 390.2479999999999
                },
                {
                  "x": 10.081,
                  "y": 390.071
                },
                {
                  "x": 11.0,
                  "y": 390.0
                }
              ]
            }
          ]
        },
        {
          "type": "go_straight",
          "startRoad": "road_1_4_1",
          "endRoad": "road_1_5_1",
          "direction": 1,
          "laneLinks": [
            {
              "startLaneIndex": 1,
              "endLaneIndex": 0,
              "points": [
                {
                  "x": 6.0,
                  "y": 389.0
                },
                {
                  "x": 5.888,
                  "y": 390.408
                },
                {
                  "x": 5.584,
                  "y": 392.344
                },
                {
                  "x": 5.136,
                  "y": 394.676
                },
                {
                  "x": 4.592,
                  "y": 397.272
                },
                {
                  "x": 4.0,
                  "y": 400.0
                },
                {
                  "x": 3.408,
                  "y": 402.728
                },
                {
                  "x": 2.864,
                  "y": 405.324
                },
                {
                  "x": 2.415999999999999,
                  "y": 407.6559999999999
                },
                {
                  "x": 2.112,
                  "y": 409.592
                },
                {
                  "x": 2.0,
                  "y": 411.0
                }
              ]
            },
            {
              "startLaneIndex": 1,
              "endLaneIndex": 1,
              "points": [
                {
                  "x": 6.0,
                  "y": 389.0
                },
                {
                  "x": 6.0,
                  "y": 390.408
                },
                {
                  "x": 6.0,
                  "y": 392.344
                },
                {
                  "x": 6.0,
                  "y": 394.676
                },
                {
                  "x": 6.0,
                  "y": 397.272
                },
                {
                  "x": 6.0,
                  "y": 400.0
                },
                {
                  "x": 6.0,
                  "y": 402.728
                },
                {
                  "x": 6.0,
                  "y": 405.324
                },
                {
                  "x": 5.999999999999999,
                  "y": 407.6559999999999
                },
                {
                  "x": 6.0,
                  "y": 409.592
                },
                {
                  "x": 6.0,
                  "y": 411.0
                }
              ]
            },
            {
              "startLaneIndex": 1,
              "endLaneIndex": 2,
              "points": [
                {
                  "x": 6.0,
                  "y": 389.0
                },
                {
                  "x": 6.112,
                  "y": 390.408
                },
                {
                  "x": 6.416,
                  "y": 392.344
                },
                {
                  "x": 6.864,
                  "y": 394.676
                },
                {
                  "x": 7.408,
                  "y": 397.272
                },
                {
                  "x": 8.0,
                  "y": 400.0
                },
                {
                  "x": 8.592,
                  "y": 402.728
                },
                {
                  "x": 9.136,
                  "y": 405.324
                },
                {
                  "x": 9.584,
                  "y": 407.6559999999999
                },
                {
                  "x": 9.888,
                  "y": 409.592
                },
                {
                  "x": 10.0,
                  "y": 411.0
                }
              ]
            }
          ]
        },
        {
          "type": "turn_left",
          "startRoad": "road_1_4_1",
          "endRoad": "road_1_5_2",
          "direction": 1,
          "laneLinks": [
            {
              "startLaneIndex": 0,
              "endLaneIndex": 0,
              "points": [
                {
                  "x": 2.0,
                  "y": 389.0
                },
                {
                  "x": 1.7349999999999999,
                  "y": 390.255
                },
                {
                  "x": 1.0,
                  "y": 391.76
                },
                {
                  "x": -0.115,
                  "y": 393.425
                },
                {
                  "x": -1.52,
                  "y": 395.15999999999997
                },
                {
                  "x": -3.125,
                  "y": 396.875
                },
                {
                  "x": -4.84,
                  "y": 398.48
                },
                {
                  "x": -6.575,
                  "y": 399.885
                },
                {
                  "x": -8.24,
                  "y": 400.9999999999999
                },
                {
                  "x": -9.745,
                  "y": 401.735
                },
                {
                  "x": -11.0,
                  "y": 402.0
                }
              ]
            },
            {
              "startLaneIndex": 0,
              "endLaneIndex": 1,
              "points": [
                {
                  "x": 2.0,
                  "y": 389.0
                },
                {
                  "x": 1.7349999999999999,
                  "y": 390.367
                },
                {
                  "x": 1.0,
                  "y": 392.176
                },
                {
                  "x": -0.115,
                  "y": 394.289
                },
                {
                  "x": -1.52,
                  "y": 396.568
                },
                {
                  "x": -3.125,
                  "y": 398.875
                },
                {
                  "x": -4.84,
                  "y": 401.072
                },
                {
                  "x": -6.575,
                  "y": 403.021
                },
                {
                  "x": -8.24,
                  "y": 404.5839999999999
                },
                {
                  "x": -9.745,
                  "y": 405.623
                },
                {
                  "x": -11.0,
                  "y": 406.0
                }
              ]
            },
            {
              "startLaneIndex": 0,
              "endLaneIndex": 2,
              "points": [
                {
                  "x": 2.0,
                  "y": 389.0
                },
                {
                  "x": 1.7349999999999999,
                  "y": 390.479
                },
                {
                  "x": 1.0,
                  "y": 392.592
                },
                {
                  "x": -0.115,
                  "y": 395.153
                },
                {
                  "x": -1.52,
                  "y": 397.976
                },
                {
                  "x": -3.125,
                  "y": 400.875
                },
                {
                  "x": -4.84,
                  "y": 403.664
                },
                {
                  "x": -6.575,
                  "y": 406.157
                },
                {
                  "x": -8.24,
                  "y": 408.1679999999999
                },
                {
                  "x": -9.745,
                  "y": 409.511
                },
                {
                  "x": -11.0,
                  "y": 410.0
                }
              ]
            }
          ]
        },
        {
          "type": "turn_right",
          "startRoad": "road_2_5_2",
          "endRoad": "road_1_5_1",
          "direction": 2,
          "laneLinks": [
            {
              "startLaneIndex": 2,
              "endLaneIndex": 0,
              "points": [
                {
                  "x": 11.0,
                  "y": 410.0
                },
                {
                  "x": 9.857,
                  "y": 409.929
                },
                {
                  "x": 8.656,
                  "y": 409.752
                },
                {
                  "x": 7.439,
                  "y": 409.523
                },
                {
                  "x": 6.248,
                  "y": 409.296
                },
                {
                  "x": 5.125,
                  "y": 409.125
                },
                {
                  "x": 4.112,
                  "y": 409.064
                },
                {
                  "x": 3.251000000000001,
                  "y": 409.167
                },
                {
                  "x": 2.584000000000001,
                  "y": 409.4879999999999
                },
                {
                  "x": 2.153,
                  "y": 410.081
                },
                {
                  "x": 2.0,
                  "y": 411.0
                }
              ]
            },
            {
              "startLaneIndex": 2,
              "endLaneIndex": 1,
              "points": [
                {
                  "x": 11.0,
                  "y": 410.0
                },
                {
                  "x": 9.969,
                  "y": 409.929
                },
                {
                  "x": 9.072,
                  "y": 409.752
                },
                {
                  "x": 8.303,
                  "y": 409.523
                },
                {
                  "x": 7.656,
                  "y": 409.296
                },
                {
                  "x": 7.125,
                  "y": 409.125
                },
                {
                  "x": 6.704,
                  "y": 409.064
                },
                {
                  "x": 6.387000000000001,
                  "y": 409.167
                },
                {
                  "x": 6.168000000000001,
                  "y": 409.4879999999999
                },
                {
                  "x": 6.0409999999999995,
                  "y": 410.081
                },
                {
                  "x": 6.0,
                  "y": 411.0
                }
              ]
            },
            {
              "startLaneIndex": 2,
              "endLaneIndex": 2,
              "points": [
                {
                  "x": 11.0,
                  "y": 410.0
                },
                {
                  "x": 10.081,
                  "y": 409.929
                },
                {
                  "x": 9.488,
                  "y": 409.752
                },
                {
                  "x": 9.167,
                  "y": 409.523
                },
                {
                  "x": 9.064,
                  "y": 409.296
                },
                {
                  "x": 9.125,
                  "y": 409.125
                },
                {
                  "x": 9.296,
                  "y": 409.064
                },
                {
                  "x": 9.523000000000001,
                  "y": 409.167
                },
                {
                  "x": 9.752,
                  "y": 409.4879999999999
                },
                {
                  "x": 9.929,
                  "y": 410.081
                },
                {
                  "x": 10.0,
                  "y": 411.0
                }
              ]
            }
          ]
        },
        {
          "type": "go_straight",
          "startRoad": "road_2_5_2",
          "endRoad": "road_1_5_2",
          "direction": 2,
          "laneLinks": [
            {
              "startLaneIndex": 1,
              "endLaneIndex": 0,
              "points": [
                {
                  "x": 11.0,
                  "y": 406.0
                },
                {
                  "x": 9.592,
                  "y": 405.888
                },
                {
                  "x": 7.656,
                  "y": 405.584
                },
                {
                  "x": 5.324,
                  "y": 405.136
                },
                {
                  "x": 2.7279999999999998,
                  "y": 404.592
                },
                {
                  "x": 0.0,
                  "y": 404.0
                },
                {
                  "x": -2.7279999999999998,
                  "y": 403.408
                },
                {
                  "x": -5.323999999999999,
                  "y": 402.864
                },
                {
                  "x": -7.655999999999999,
                  "y": 402.416
                },
                {
                  "x": -9.592,
                  "y": 402.112
                },
                {
                  "x": -11.0,
                  "y": 402.0
                }
              ]
            },
            {
              "startLaneIndex": 1,
              "endLaneIndex": 1,
              "points": [
                {
                  "x": 11.0,
                  "y": 406.0
                },
                {
                  "x": 9.592,
                  "y": 406.0
                },
                {
                  "x": 7.656,
                  "y": 406.0
                },
                {
                  "x": 5.324,
                  "y": 406.0
                },
                {
                  "x": 2.7279999999999998,
                  "y": 406.0
                },
                {
                  "x": 0.0,
                  "y": 406.0
                },
                {
                  "x": -2.7279999999999998,
                  "y": 406.0
                },
                {
                  "x": -5.323999999999999,
                  "y": 406.0
                },
                {
                  "x": -7.655999999999999,
                  "y": 406.0
                },
                {
                  "x": -9.592,
                  "y": 406.0
                },
                {
                  "x": -11.0,
                  "y": 406.0
                }
              ]
            },
            {
              "startLaneIndex": 1,
              "endLaneIndex": 2,
              "points": [
                {
                  "x": 11.0,
                  "y": 406.0
                },
                {
                  "x": 9.592,
                  "y": 406.112
                },
                {
                  "x": 7.656,
                  "y": 406.416
                },
                {
                  "x": 5.324,
                  "y": 406.864
                },
                {
                  "x": 2.7279999999999998,
                  "y": 407.408
                },
                {
                  "x": 0.0,
                  "y": 408.0
                },
                {
                  "x": -2.7279999999999998,
                  "y": 408.592
                },
                {
                  "x": -5.323999999999999,
                  "y": 409.136
                },
                {
                  "x": -7.655999999999999,
                  "y": 409.584
                },
                {
                  "x": -9.592,
                  "y": 409.888
                },
                {
                  "x": -11.0,
                  "y": 410.0
                }
              ]
            }
          ]
        },
        {
          "type": "turn_left",
          "startRoad": "road_2_5_2",
          "endRoad": "road_1_5_3",
          "direction": 2,
          "laneLinks": [
            {
              "startLaneIndex": 0,
              "endLaneIndex": 0,
              "points": [
                {
                  "x": 11.0,
                  "y": 402.0
                },
                {
                  "x": 9.745,
                  "y": 401.735
                },
                {
                  "x": 8.24,
                  "y": 401.0
                },
                {
                  "x": 6.575,
                  "y": 399.885
                },
                {
                  "x": 4.84,
                  "y": 398.48
                },
                {
                  "x": 3.125,
                  "y": 396.875
                },
                {
                  "x": 1.52,
                  "y": 395.15999999999997
                },
                {
                  "x": 0.115000000000001,
                  "y": 393.425
                },
                {
                  "x": -0.999999999999999,
                  "y": 391.76
                },
                {
                  "x": -1.735,
                  "y": 390.255
                },
                {
                  "x": -2.0,
                  "y": 389.0
                }
              ]
            },
            {
              "startLaneIndex": 0,
              "endLaneIndex": 1,
              "points": [
                {
                  "x": 11.0,
                  "y": 402.0
                },
                {
                  "x": 9.633,
                  "y": 401.735
                },
                {
                  "x": 7.824,
                  "y": 401.0
                },
                {
                  "x": 5.711,
                  "y": 399.885
                },
                {
                  "x": 3.432,
                  "y": 398.48
                },
                {
                  "x": 1.125,
                  "y": 396.875
                },
                {
                  "x": -1.072,
                  "y": 395.15999999999997
                },
                {
                  "x": -3.020999999999999,
                  "y": 393.425
                },
                {
                  "x": -4.583999999999999,
                  "y": 391.76
                },
                {
                  "x": -5.623,
                  "y": 390.255
                },
                {
                  "x": -6.0,
                  "y": 389.0
                }
              ]
            },
            {
              "startLaneIndex": 0,
              "endLaneIndex": 2,
              "points": [
                {
                  "x": 11.0,
                  "y": 402.0
                },
                {
                  "x": 9.521,
                  "y": 401.735
                },
                {
                  "x": 7.408,
                  "y": 401.0
                },
                {
                  "x": 4.8469999999999995,
                  "y": 399.885
                },
                {
                  "x": 2.024,
                  "y": 398.48
                },
                {
                  "x": -0.875,
                  "y": 396.875
                },
                {
                  "x": -3.664,
                  "y": 395.15999999999997
                },
                {
                  "x": -6.156999999999999,
                  "y": 393.425
                },
                {
                  "x": -8.168,
                  "y": 391.76
                },
                {
                  "x": -9.511,
                  "y": 390.255
                },
                {
                  "x": -10.0,
                  "y": 389.0
                }
              ]
            }
          ]
        },
        {
          "type": "turn_left",
          "startRoad": "road_1_6_3",
          "endRoad": "road_1_5_0",
          "direction": 3,
          "laneLinks": [
            {
              "startLaneIndex": 0,
              "endLaneIndex": 0,
              "points": [
                {
                  "x": -2.0,
                  "y": 411.0
                },
                {
                  "x": -1.7349999999999999,
                  "y": 409.745
                },
                {
                  "x": -1.0,
                  "y": 408.24
                },
                {
                  "x": 0.115,
                  "y": 406.575
                },
                {
                  "x": 1.52,
                  "y": 404.84
                },
                {
                  "x": 3.125,
                  "y": 403.125
                },
                {
                  "x": 4.84,
                  "y": 401.52
                },
                {
                  "x": 6.575,
                  "y": 400.115
                },
                {
                  "x": 8.24,
                  "y": 398.9999999999999
                },
                {
                  "x": 9.745,
                  "y": 398.265
                },
                {
                  "x": 11.0,
                  "y": 398.0
                }
              ]
            },
            {
              "startLaneIndex": 0,
              "endLaneIndex": 1,
              "points": [
                {
                  "x": -2.0,
                  "y": 411.0
                },
                {
                  "x": -1.7349999999999999,
                  "y": 409.633
                },
                {
                  "x": -1.0,
                  "y": 407.824
                },
                {
                  "x": 0.115,
                  "y": 405.711
                },
                {
                  "x": 1.52,
                  "y": 403.432
                },
                {
                  "x": 3.125,
                  "y": 401.125
                },
                {
                  "x": 4.84,
                  "y": 398.928
                },
                {
                  "x": 6.575,
                  "y": 396.979
                },
                {
                  "x": 8.24,
                  "y": 395.4159999999999
                },
                {
                  "x": 9.745,
                  "y": 394.377
                },
                {
                  "x": 11.0,
                  "y": 394.0
                }
              ]
            },
            {
              "startLaneIndex": 0,
              "endLaneIndex": 2,
              "points": [
                {
                  "x": -2.0,
                  "y": 411.0
                },
                {
                  "x": -1.7349999999999999,
                  "y": 409.521
                },
                {
                  "x": -1.0,
                  "y": 407.408
                },
                {
                  "x": 0.115,
                  "y": 404.847
                },
                {
                  "x": 1.52,
                  "y": 402.024
                },
                {
                  "x": 3.125,
                  "y": 399.125
                },
                {
                  "x": 4.84,
                  "y": 396.336
                },
                {
                  "x": 6.575,
                  "y": 393.843
                },
                {
                  "x": 8.24,
                  "y": 391.8319999999999
                },
                {
                  "x": 9.745,
                  "y": 390.489
                },
                {
                  "x": 11.0,
                  "y": 390.0
                }
              ]
            }
          ]
        },
        {
          "type": "turn_right",
          "startRoad": "road_1_6_3",
          "endRoad": "road_1_5_2",
          "direction": 3,
          "laneLinks": [
            {
              "startLaneIndex": 2,
              "endLaneIndex": 0,
              "points": [
                {
                  "x": -10.0,
                  "y": 411.0
                },
                {
                  "x": -9.929,
                  "y": 409.85699999999997
                },
                {
                  "x": -9.752,
                  "y": 408.656
                },
                {
                  "x": -9.523,
                  "y": 407.439
                },
                {
                  "x": -9.296,
                  "y": 406.248
                },
                {
                  "x": -9.125,
                  "y": 405.125
                },
                {
                  "x": -9.064,
                  "y": 404.112
                },
                {
                  "x": -9.167,
                  "y": 403.251
                },
                {
                  "x": -9.488,
                  "y": 402.5839999999999
                },
                {
                  "x": -10.081,
                  "y": 402.153
                },
                {
                  "x": -11.0,
                  "y": 402.0
                }
              ]
            },
            {
              "startLaneIndex": 2,
              "endLaneIndex": 1,
              "points": [
                {
                  "x": -10.0,
                  "y": 411.0
                },
                {
                  "x": -9.929,
                  "y": 409.969
                },
                {
                  "x": -9.752,
                  "y": 409.072
                },
                {
                  "x": -9.523,
                  "y": 408.303
                },
                {
                  "x": -9.296,
                  "y": 407.656
                },
                {
                  "x": -9.125,
                  "y": 407.125
                },
                {
                  "x": -9.064,
                  "y": 406.704
                },
                {
                  "x": -9.167,
                  "y": 406.387
                },
                {
                  "x": -9.488,
                  "y": 406.1679999999999
                },
                {
                  "x": -10.081,
                  "y": 406.041
                },
                {
                  "x": -11.0,
                  "y": 406.0
                }
              ]
            },
            {
              "startLaneIndex": 2,
              "endLaneIndex": 2,
              "points": [
                {
                  "x": -10.0,
                  "y": 411.0
                },
                {
                  "x": -9.929,
                  "y": 410.081
                },
                {
                  "x": -9.752,
                  "y": 409.488
                },
                {
                  "x": -9.523,
                  "y": 409.167
                },
                {
                  "x": -9.296,
                  "y": 409.064
                },
                {
                  "x": -9.125,
                  "y": 409.125
                },
                {
                  "x": -9.064,
                  "y": 409.296
                },
                {
                  "x": -9.167,
                  "y": 409.523
                },
                {
                  "x": -9.488,
                  "y": 409.7519999999999
                },
                {
                  "x": -10.081,
                  "y": 409.929
                },
                {
                  "x": -11.0,
                  "y": 410.0
                }
              ]
            }
          ]
        },
        {
          "type": "go_straight",
          "startRoad": "road_1_6_3",
          "endRoad": "road_1_5_3",
          "direction": 3,
          "laneLinks": [
            {
              "startLaneIndex": 1,
              "endLaneIndex": 0,
              "points": [
                {
                  "x": -6.0,
                  "y": 411.0
                },
                {
                  "x": -5.888,
                  "y": 409.592
                },
                {
                  "x": -5.584,
                  "y": 407.656
                },
                {
                  "x": -5.136,
                  "y": 405.324
                },
                {
                  "x": -4.592,
                  "y": 402.728
                },
                {
                  "x": -4.0,
                  "y": 400.0
                },
                {
                  "x": -3.408,
                  "y": 397.272
                },
                {
                  "x": -2.864,
                  "y": 394.676
                },
                {
                  "x": -2.415999999999999,
                  "y": 392.3439999999999
                },
                {
                  "x": -2.112,
                  "y": 390.408
                },
                {
                  "x": -2.0,
                  "y": 389.0
                }
              ]
            },
            {
              "startLaneIndex": 1,
              "endLaneIndex": 1,
              "points": [
                {
                  "x": -6.0,
                  "y": 411.0
                },
                {
                  "x": -6.0,
                  "y": 409.592
                },
                {
                  "x": -6.0,
                  "y": 407.656
                },
                {
                  "x": -6.0,
                  "y": 405.324
                },
                {
                  "x": -6.0,
                  "y": 402.728
                },
                {
                  "x": -6.0,
                  "y": 400.0
                },
                {
                  "x": -6.0,
                  "y": 397.272
                },
                {
                  "x": -6.0,
                  "y": 394.676
                },
                {
                  "x": -5.999999999999999,
                  "y": 392.3439999999999
                },
                {
                  "x": -6.0,
                  "y": 390.408
                },
                {
                  "x": -6.0,
                  "y": 389.0
                }
              ]
            },
            {
              "startLaneIndex": 1,
              "endLaneIndex": 2,
              "points": [
                {
                  "x": -6.0,
                  "y": 411.0
                },
                {
                  "x": -6.112,
                  "y": 409.592
                },
                {
                  "x": -6.416,
                  "y": 407.656
                },
                {
                  "x": -6.864,
                  "y": 405.324
                },
                {
                  "x": -7.408,
                  "y": 402.728
                },
                {
                  "x": -8.0,
                  "y": 400.0
                },
                {
                  "x": -8.592,
                  "y": 397.272
                },
                {
                  "x": -9.136,
                  "y": 394.676
                },
                {
                  "x": -9.584,
                  "y": 392.3439999999999
                },
                {
                  "x": -9.888,
                  "y": 390.408
                },
                {
                  "x": -10.0,
                  "y": 389.0
                }
              ]
            }
          ]
        }
      ],
      "trafficLight": {
        "roadLinkIndices": [
          0,
          1,
          2,
          3,
          4,
          5,
          6,
          7,
          8,
          9,
          10,
          11
        ],
        "lightphases": [
          {
            "time": 5,
            "availableRoadLinks": [
              10,
              2,
              3,
              6
            ]
          },
          {
            "time": 30,
            "availableRoadLinks": [
              0,
              2,
              3,
              6,
              7,
              10
            ]
          },
          {
            "time": 30,
            "availableRoadLinks": [
              2,
              3,
              4,
              6,
              10,
              11
            ]
          },
          {
            "time": 30,
            "availableRoadLinks": [
              1,
              2,
              3,
              6,
              8,
              10
            ]
          },
          {
            "time": 30,
            "availableRoadLinks": [
              2,
              3,
              5,
              6,
              9,
              10
            ]
          },
          {
            "time": 30,
            "availableRoadLinks": [
              0,
              1,
              2,
              3,
              6,
              10
            ]
          },
          {
            "time": 30,
            "availableRoadLinks": [
              2,
              3,
              6,
              7,
              8,
              10
            ]
          },
          {
            "time": 30,
            "availableRoadLinks": [
              2,
              3,
              4,
              5,
              6,
              10
            ]
          },
          {
            "time": 30,
            "availableRoadLinks": [
              2,
              3,
              6,
              9,
              10,
              11
            ]
          }
        ]
      },
      "virtual": false
    },
    {
      "id": "intersection_1_6",
      "point": {
        "x": 0,
        "y": 500
      },
      "width": 11,
      "roads": [
        "road_0_6_0",
        "road_1_5_1",
        "road_2_6_2",
        "road_1_7_3",
        "road_1_6_0",
        "road_1_6_1",
        "road_1_6_2",
        "road_1_6_3"
      ],
      "roadLinks": [
        {
          "type": "go_straight",
          "startRoad": "road_0_6_0",
          "endRoad": "road_1_6_0",
          "direction": 0,
          "laneLinks": [
            {
              "startLaneIndex": 1,
              "endLaneIndex": 0,
              "points": [
                {
                  "x": -11.0,
                  "y": 494.0
                },
                {
                  "x": -9.592,
                  "y": 494.112
                },
                {
                  "x": -7.656,
                  "y": 494.416
                },
                {
                  "x": -5.324,
                  "y": 494.864
                },
                {
                  "x": -2.7279999999999998,
                  "y": 495.408
                },
                {
                  "x": 0.0,
                  "y": 496.0
                },
                {
                  "x": 2.7279999999999998,
                  "y": 496.592
                },
                {
                  "x": 5.323999999999999,
                  "y": 497.136
                },
                {
                  "x": 7.655999999999999,
                  "y": 497.5839999999999
                },
                {
                  "x": 9.592,
                  "y": 497.888
                },
                {
                  "x": 11.0,
                  "y": 498.0
                }
              ]
            },
            {
              "startLaneIndex": 1,
              "endLaneIndex": 1,
              "points": [
                {
                  "x": -11.0,
                  "y": 494.0
                },
                {
                  "x": -9.592,
                  "y": 494.0
                },
                {
                  "x": -7.656,
                  "y": 494.0
                },
                {
                  "x": -5.324,
                  "y": 494.0
                },
                {
                  "x": -2.7279999999999998,
                  "y": 494.0
                },
                {
                  "x": 0.0,
                  "y": 494.0
                },
                {
                  "x": 2.7279999999999998,
                  "y": 494.0
                },
                {
                  "x": 5.323999999999999,
                  "y": 494.0
                },
                {
                  "x": 7.655999999999999,
                  "y": 493.9999999999999
                },
                {
                  "x": 9.592,
                  "y": 494.0
                },
                {
                  "x": 11.0,
                  "y": 494.0
                }
              ]
            },
            {
              "startLaneIndex": 1,
              "endLaneIndex": 2,
              "points": [
                {
                  "x": -11.0,
                  "y": 494.0
                },
                {
                  "x": -9.592,
                  "y": 493.888
                },
                {
                  "x": -7.656,
                  "y": 493.584
                },
                {
                  "x": -5.324,
                  "y": 493.136
                },
                {
                  "x": -2.7279999999999998,
                  "y": 492.592
                },
                {
                  "x": 0.0,
                  "y": 492.0
                },
                {
                  "x": 2.7279999999999998,
                  "y": 491.408
                },
                {
                  "x": 5.323999999999999,
                  "y": 490.864
                },
                {
                  "x": 7.655999999999999,
                  "y": 490.4159999999999
                },
                {
                  "x": 9.592,
                  "y": 490.112
                },
                {
                  "x": 11.0,
                  "y": 490.0
                }
              ]
            }
          ]
        },
        {
          "type": "turn_left",
          "startRoad": "road_0_6_0",
          "endRoad": "road_1_6_1",
          "direction": 0,
          "laneLinks": [
            {
              "startLaneIndex": 0,
              "endLaneIndex": 0,
              "points": [
                {
                  "x": -11.0,
                  "y": 498.0
                },
                {
                  "x": -9.745,
                  "y": 498.265
                },
                {
                  "x": -8.24,
                  "y": 499.0
                },
                {
                  "x": -6.575,
                  "y": 500.115
                },
                {
                  "x": -4.84,
                  "y": 501.52
                },
                {
                  "x": -3.125,
                  "y": 503.125
                },
                {
                  "x": -1.52,
                  "y": 504.84
                },
                {
                  "x": -0.115000000000001,
                  "y": 506.575
                },
                {
                  "x": 0.999999999999999,
                  "y": 508.2399999999999
                },
                {
                  "x": 1.735,
                  "y": 509.745
                },
                {
                  "x": 2.0,
                  "y": 511.0
                }
              ]
            },
            {
              "startLaneIndex": 0,
              "endLaneIndex": 1,
              "points": [
                {
                  "x": -11.0,
                  "y": 498.0
                },
                {
                  "x": -9.633,
                  "y": 498.265
                },
                {
                  "x": -7.824,
                  "y": 499.0
                },
                {
                  "x": -5.711,
                  "y": 500.115
                },
                {
                  "x": -3.432,
                  "y": 501.52
                },
                {
                  "x": -1.125,
                  "y": 503.125
                },
                {
                  "x": 1.072,
                  "y": 504.84
                },
                {
                  "x": 3.020999999999999,
                  "y": 506.575
                },
                {
                  "x": 4.583999999999999,
                  "y": 508.2399999999999
                },
                {
                  "x": 5.623,
                  "y": 509.745
                },
                {
                  "x": 6.0,
                  "y": 511.0
                }
              ]
            },
            {
              "startLaneIndex": 0,
              "endLaneIndex": 2,
              "points": [
                {
                  "x": -11.0,
                  "y": 498.0
                },
                {
                  "x": -9.521,
                  "y": 498.265
                },
                {
                  "x": -7.408,
                  "y": 499.0
                },
                {
                  "x": -4.8469999999999995,
                  "y": 500.115
                },
                {
                  "x": -2.024,
                  "y": 501.52
                },
                {
                  "x": 0.875,
                  "y": 503.125
                },
                {
                  "x": 3.664,
                  "y": 504.84
                },
                {
                  "x": 6.156999999999999,
                  "y": 506.575
                },
                {
                  "x": 8.168,
                  "y": 508.2399999999999
                },
                {
                  "x": 9.511,
                  "y": 509.745
                },
                {
                  "x": 10.0,
                  "y": 511.0
                }
              ]
            }
          ]
        },
        {
          "type": "turn_right",
          "startRoad": "road_0_6_0",
          "endRoad": "road_1_6_3",
          "direction": 0,
          "laneLinks": [
            {
              "startLaneIndex": 2,
              "endLaneIndex": 0,
              "points": [
                {
                  "x": -11.0,
                  "y": 490.0
                },
                {
                  "x": -9.857,
                  "y": 490.071
                },
                {
                  "x": -8.656,
                  "y": 490.248
                },
                {
                  "x": -7.439,
                  "y": 490.477
                },
                {
                  "x": -6.248,
                  "y": 490.704
                },
                {
                  "x": -5.125,
                  "y": 490.875
                },
                {
                  "x": -4.112,
                  "y": 490.936
                },
                {
                  "x": -3.251000000000001,
                  "y": 490.83299999999997
                },
                {
                  "x": -2.584000000000001,
                  "y": 490.5119999999999
                },
                {
                  "x": -2.153,
                  "y": 489.919
                },
                {
                  "x": -2.0,
                  "y": 489.0
                }
              ]
            },
            {
              "startLaneIndex": 2,
              "endLaneIndex": 1,
              "points": [
                {
                  "x": -11.0,
                  "y": 490.0
                },
                {
                  "x": -9.969,
                  "y": 490.071
                },
                {
                  "x": -9.072,
                  "y": 490.248
                },
                {
                  "x": -8.303,
                  "y": 490.477
                },
                {
                  "x": -7.656,
                  "y": 490.704
                },
                {
                  "x": -7.125,
                  "y": 490.875
                },
                {
                  "x": -6.704,
                  "y": 490.936
                },
                {
                  "x": -6.387000000000001,
                  "y": 490.83299999999997
                },
                {
                  "x": -6.168000000000001,
                  "y": 490.5119999999999
                },
                {
                  "x": -6.0409999999999995,
                  "y": 489.919
                },
                {
                  "x": -6.0,
                  "y": 489.0
                }
              ]
            },
            {
              "startLaneIndex": 2,
              "endLaneIndex": 2,
              "points": [
                {
                  "x": -11.0,
                  "y": 490.0
                },
                {
                  "x": -10.081,
                  "y": 490.071
                },
                {
                  "x": -9.488,
                  "y": 490.248
                },
                {
                  "x": -9.167,
                  "y": 490.477
                },
                {
                  "x": -9.064,
                  "y": 490.704
                },
                {
                  "x": -9.125,
                  "y": 490.875
                },
                {
                  "x": -9.296,
                  "y": 490.936
                },
                {
                  "x": -9.523000000000001,
                  "y": 490.83299999999997
                },
                {
                  "x": -9.752,
                  "y": 490.5119999999999
                },
                {
                  "x": -9.929,
                  "y": 489.919
                },
                {
                  "x": -10.0,
                  "y": 489.0
                }
              ]
            }
          ]
        },
        {
          "type": "turn_right",
          "startRoad": "road_1_5_1",
          "endRoad": "road_1_6_0",
          "direction": 1,
          "laneLinks": [
            {
              "startLaneIndex": 2,
              "endLaneIndex": 0,
              "points": [
                {
                  "x": 10.0,
                  "y": 489.0
                },
                {
                  "x": 9.929,
                  "y": 490.143
                },
                {
                  "x": 9.752,
                  "y": 491.344
                },
                {
                  "x": 9.523,
                  "y": 492.561
                },
                {
                  "x": 9.296,
                  "y": 493.752
                },
                {
                  "x": 9.125,
                  "y": 494.875
                },
                {
                  "x": 9.064,
                  "y": 495.888
                },
                {
                  "x": 9.167,
                  "y": 496.749
                },
                {
                  "x": 9.488,
                  "y": 497.4159999999999
                },
                {
                  "x": 10.081,
                  "y": 497.847
                },
                {
                  "x": 11.0,
                  "y": 498.0
                }
              ]
            },
            {
              "startLaneIndex": 2,
              "endLaneIndex": 1,
              "points": [
                {
                  "x": 10.0,
                  "y": 489.0
                },
                {
                  "x": 9.929,
                  "y": 490.031
                },
                {
                  "x": 9.752,
                  "y": 490.928
                },
                {
                  "x": 9.523,
                  "y": 491.697
                },
                {
                  "x": 9.296,
                  "y": 492.344
                },
                {
                  "x": 9.125,
                  "y": 492.875
                },
                {
                  "x": 9.064,
                  "y": 493.296
                },
                {
                  "x": 9.167,
                  "y": 493.613
                },
                {
                  "x": 9.488,
                  "y": 493.8319999999999
                },
                {
                  "x": 10.081,
                  "y": 493.959
                },
                {
                  "x": 11.0,
                  "y": 494.0
                }
              ]
            },
            {
              "startLaneIndex": 2,
              "endLaneIndex": 2,
              "points": [
                {
                  "x": 10.0,
                  "y": 489.0
                },
                {
                  "x": 9.929,
                  "y": 489.919
                },
                {
                  "x": 9.752,
                  "y": 490.512
                },
                {
                  "x": 9.523,
                  "y": 490.83299999999997
                },
                {
                  "x": 9.296,
                  "y": 490.936
                },
                {
                  "x": 9.125,
                  "y": 490.875
                },
                {
                  "x": 9.064,
                  "y": 490.704
                },
                {
                  "x": 9.167,
                  "y": 490.477
                },
                {
                  "x": 9.488,
                  "y": 490.2479999999999
                },
                {
                  "x": 10.081,
                  "y": 490.071
                },
                {
                  "x": 11.0,
                  "y": 490.0
                }
              ]
            }
          ]
        },
        {
          "type": "go_straight",
          "startRoad": "road_1_5_1",
          "endRoad": "road_1_6_1",
          "direction": 1,
          "laneLinks": [
            {
              "startLaneIndex": 1,
              "endLaneIndex": 0,
              "points": [
                {
                  "x": 6.0,
                  "y": 489.0
                },
                {
                  "x": 5.888,
                  "y": 490.408
                },
                {
                  "x": 5.584,
                  "y": 492.344
                },
                {
                  "x": 5.136,
                  "y": 494.676
                },
                {
                  "x": 4.592,
                  "y": 497.272
                },
                {
                  "x": 4.0,
                  "y": 500.0
                },
                {
                  "x": 3.408,
                  "y": 502.728
                },
                {
                  "x": 2.864,
                  "y": 505.324
                },
                {
                  "x": 2.415999999999999,
                  "y": 507.6559999999999
                },
                {
                  "x": 2.112,
                  "y": 509.592
                },
                {
                  "x": 2.0,
                  "y": 511.0
                }
              ]
            },
            {
              "startLaneIndex": 1,
              "endLaneIndex": 1,
              "points": [
                {
                  "x": 6.0,
                  "y": 489.0
                },
                {
                  "x": 6.0,
                  "y": 490.408
                },
                {
                  "x": 6.0,
                  "y": 492.344
                },
                {
                  "x": 6.0,
                  "y": 494.676
                },
                {
                  "x": 6.0,
                  "y": 497.272
                },
                {
                  "x": 6.0,
                  "y": 500.0
                },
                {
                  "x": 6.0,
                  "y": 502.728
                },
                {
                  "x": 6.0,
                  "y": 505.324
                },
                {
                  "x": 5.999999999999999,
                  "y": 507.6559999999999
                },
                {
                  "x": 6.0,
                  "y": 509.592
                },
                {
                  "x": 6.0,
                  "y": 511.0
                }
              ]
            },
            {
              "startLaneIndex": 1,
              "endLaneIndex": 2,
              "points": [
                {
                  "x": 6.0,
                  "y": 489.0
                },
                {
                  "x": 6.112,
                  "y": 490.408
                },
                {
                  "x": 6.416,
                  "y": 492.344
                },
                {
                  "x": 6.864,
                  "y": 494.676
                },
                {
                  "x": 7.408,
                  "y": 497.272
                },
                {
                  "x": 8.0,
                  "y": 500.0
                },
                {
                  "x": 8.592,
                  "y": 502.728
                },
                {
                  "x": 9.136,
                  "y": 505.324
                },
                {
                  "x": 9.584,
                  "y": 507.6559999999999
                },
                {
                  "x": 9.888,
                  "y": 509.592
                },
                {
                  "x": 10.0,
                  "y": 511.0
                }
              ]
            }
          ]
        },
        {
          "type": "turn_left",
          "startRoad": "road_1_5_1",
          "endRoad": "road_1_6_2",
          "direction": 1,
          "laneLinks": [
            {
              "startLaneIndex": 0,
              "endLaneIndex": 0,
              "points": [
                {
                  "x": 2.0,
                  "y": 489.0
                },
                {
                  "x": 1.7349999999999999,
                  "y": 490.255
                },
                {
                  "x": 1.0,
                  "y": 491.76
                },
                {
                  "x": -0.115,
                  "y": 493.425
                },
                {
                  "x": -1.52,
                  "y": 495.15999999999997
                },
                {
                  "x": -3.125,
                  "y": 496.875
                },
                {
                  "x": -4.84,
                  "y": 498.48
                },
                {
                  "x": -6.575,
                  "y": 499.885
                },
                {
                  "x": -8.24,
                  "y": 500.9999999999999
                },
                {
                  "x": -9.745,
                  "y": 501.735
                },
                {
                  "x": -11.0,
                  "y": 502.0
                }
              ]
            },
            {
              "startLaneIndex": 0,
              "endLaneIndex": 1,
              "points": [
                {
                  "x": 2.0,
                  "y": 489.0
                },
                {
                  "x": 1.7349999999999999,
                  "y": 490.367
                },
                {
                  "x": 1.0,
                  "y": 492.176
                },
                {
                  "x": -0.115,
                  "y": 494.289
                },
                {
                  "x": -1.52,
                  "y": 496.568
                },
                {
                  "x": -3.125,
                  "y": 498.875
                },
                {
                  "x": -4.84,
                  "y": 501.072
                },
                {
                  "x": -6.575,
                  "y": 503.021
                },
                {
                  "x": -8.24,
                  "y": 504.5839999999999
                },
                {
                  "x": -9.745,
                  "y": 505.623
                },
                {
                  "x": -11.0,
                  "y": 506.0
                }
              ]
            },
            {
              "startLaneIndex": 0,
              "endLaneIndex": 2,
              "points": [
                {
                  "x": 2.0,
                  "y": 489.0
                },
                {
                  "x": 1.7349999999999999,
                  "y": 490.479
                },
                {
                  "x": 1.0,
                  "y": 492.592
                },
                {
                  "x": -0.115,
                  "y": 495.153
                },
                {
                  "x": -1.52,
                  "y": 497.976
                },
                {
                  "x": -3.125,
                  "y": 500.875
                },
                {
                  "x": -4.84,
                  "y": 503.664
                },
                {
                  "x": -6.575,
                  "y": 506.157
                },
                {
                  "x": -8.24,
                  "y": 508.1679999999999
                },
                {
                  "x": -9.745,
                  "y": 509.511
                },
                {
                  "x": -11.0,
                  "y": 510.0
                }
              ]
            }
          ]
        },
        {
          "type": "turn_right",
          "startRoad": "road_2_6_2",
          "endRoad": "road_1_6_1",
          "direction": 2,
          "laneLinks": [
            {
              "startLaneIndex": 2,
              "endLaneIndex": 0,
              "points": [
                {
                  "x": 11.0,
                  "y": 510.0
                },
                {
                  "x": 9.857,
                  "y": 509.929
                },
                {
                  "x": 8.656,
                  "y": 509.752
                },
                {
                  "x": 7.439,
                  "y": 509.523
                },
                {
                  "x": 6.248,
                  "y": 509.296
                },
                {
                  "x": 5.125,
                  "y": 509.125
                },
                {
                  "x": 4.112,
                  "y": 509.064
                },
                {
                  "x": 3.251000000000001,
                  "y": 509.167
                },
                {
                  "x": 2.584000000000001,
                  "y": 509.4879999999999
                },
                {
                  "x": 2.153,
                  "y": 510.081
                },
                {
                  "x": 2.0,
                  "y": 511.0
                }
              ]
            },
            {
              "startLaneIndex": 2,
              "endLaneIndex": 1,
              "points": [
                {
                  "x": 11.0,
                  "y": 510.0
                },
                {
                  "x": 9.969,
                  "y": 509.929
                },
                {
                  "x": 9.072,
                  "y": 509.752
                },
                {
                  "x": 8.303,
                  "y": 509.523
                },
                {
                  "x": 7.656,
                  "y": 509.296
                },
                {
                  "x": 7.125,
                  "y": 509.125
                },
                {
                  "x": 6.704,
                  "y": 509.064
                },
                {
                  "x": 6.387000000000001,
                  "y": 509.167
                },
                {
                  "x": 6.168000000000001,
                  "y": 509.4879999999999
                },
                {
                  "x": 6.0409999999999995,
                  "y": 510.081
                },
                {
                  "x": 6.0,
                  "y": 511.0
                }
              ]
            },
            {
              "startLaneIndex": 2,
              "endLaneIndex": 2,
              "points": [
                {
                  "x": 11.0,
                  "y": 510.0
                },
                {
                  "x": 10.081,
                  "y": 509.929
                },
                {
                  "x": 9.488,
                  "y": 509.752
                },
                {
                  "x": 9.167,
                  "y": 509.523
                },
                {
                  "x": 9.064,
                  "y": 509.296
                },
                {
                  "x": 9.125,
                  "y": 509.125
                },
                {
                  "x": 9.296,
                  "y": 509.064
                },
                {
                  "x": 9.523000000000001,
                  "y": 509.167
                },
                {
                  "x": 9.752,
                  "y": 509.4879999999999
                },
                {
                  "x": 9.929,
                  "y": 510.081
                },
                {
                  "x": 10.0,
                  "y": 511.0
                }
              ]
            }
          ]
        },
        {
          "type": "go_straight",
          "startRoad": "road_2_6_2",
          "endRoad": "road_1_6_2",
          "direction": 2,
          "laneLinks": [
            {
              "startLaneIndex": 1,
              "endLaneIndex": 0,
              "points": [
                {
                  "x": 11.0,
                  "y": 506.0
                },
                {
                  "x": 9.592,
                  "y": 505.888
                },
                {
                  "x": 7.656,
                  "y": 505.584
                },
                {
                  "x": 5.324,
                  "y": 505.136
                },
                {
                  "x": 2.7279999999999998,
                  "y": 504.592
                },
                {
                  "x": 0.0,
                  "y": 504.0
                },
                {
                  "x": -2.7279999999999998,
                  "y": 503.408
                },
                {
                  "x": -5.323999999999999,
                  "y": 502.864
                },
                {
                  "x": -7.655999999999999,
                  "y": 502.4159999999999
                },
                {
                  "x": -9.592,
                  "y": 502.112
                },
                {
                  "x": -11.0,
                  "y": 502.0
                }
              ]
            },
            {
              "startLaneIndex": 1,
              "endLaneIndex": 1,
              "points": [
                {
                  "x": 11.0,
                  "y": 506.0
                },
                {
                  "x": 9.592,
                  "y": 506.0
                },
                {
                  "x": 7.656,
                  "y": 506.0
                },
                {
                  "x": 5.324,
                  "y": 506.0
                },
                {
                  "x": 2.7279999999999998,
                  "y": 506.0
                },
                {
                  "x": 0.0,
                  "y": 506.0
                },
                {
                  "x": -2.7279999999999998,
                  "y": 506.0
                },
                {
                  "x": -5.323999999999999,
                  "y": 506.0
                },
                {
                  "x": -7.655999999999999,
                  "y": 505.9999999999999
                },
                {
                  "x": -9.592,
                  "y": 506.0
                },
                {
                  "x": -11.0,
                  "y": 506.0
                }
              ]
            },
            {
              "startLaneIndex": 1,
              "endLaneIndex": 2,
              "points": [
                {
                  "x": 11.0,
                  "y": 506.0
                },
                {
                  "x": 9.592,
                  "y": 506.112
                },
                {
                  "x": 7.656,
                  "y": 506.416
                },
                {
                  "x": 5.324,
                  "y": 506.864
                },
                {
                  "x": 2.7279999999999998,
                  "y": 507.408
                },
                {
                  "x": 0.0,
                  "y": 508.0
                },
                {
                  "x": -2.7279999999999998,
                  "y": 508.592
                },
                {
                  "x": -5.323999999999999,
                  "y": 509.136
                },
                {
                  "x": -7.655999999999999,
                  "y": 509.5839999999999
                },
                {
                  "x": -9.592,
                  "y": 509.888
                },
                {
                  "x": -11.0,
                  "y": 510.0
                }
              ]
            }
          ]
        },
        {
          "type": "turn_left",
          "startRoad": "road_2_6_2",
          "endRoad": "road_1_6_3",
          "direction": 2,
          "laneLinks": [
            {
              "startLaneIndex": 0,
              "endLaneIndex": 0,
              "points": [
                {
                  "x": 11.0,
                  "y": 502.0
                },
                {
                  "x": 9.745,
                  "y": 501.735
                },
                {
                  "x": 8.24,
                  "y": 501.0
                },
                {
                  "x": 6.575,
                  "y": 499.885
                },
                {
                  "x": 4.84,
                  "y": 498.48
                },
                {
                  "x": 3.125,
                  "y": 496.875
                },
                {
                  "x": 1.52,
                  "y": 495.15999999999997
                },
                {
                  "x": 0.115000000000001,
                  "y": 493.425
                },
                {
                  "x": -0.999999999999999,
                  "y": 491.7599999999999
                },
                {
                  "x": -1.735,
                  "y": 490.255
                },
                {
                  "x": -2.0,
                  "y": 489.0
                }
              ]
            },
            {
              "startLaneIndex": 0,
              "endLaneIndex": 1,
              "points": [
                {
                  "x": 11.0,
                  "y": 502.0
                },
                {
                  "x": 9.633,
                  "y": 501.735
                },
                {
                  "x": 7.824,
                  "y": 501.0
                },
                {
                  "x": 5.711,
                  "y": 499.885
                },
                {
                  "x": 3.432,
                  "y": 498.48
                },
                {
                  "x": 1.125,
                  "y": 496.875
                },
                {
                  "x": -1.072,
                  "y": 495.15999999999997
                },
                {
                  "x": -3.020999999999999,
                  "y": 493.425
                },
                {
                  "x": -4.583999999999999,
                  "y": 491.7599999999999
                },
                {
                  "x": -5.623,
                  "y": 490.255
                },
                {
                  "x": -6.0,
                  "y": 489.0
                }
              ]
            },
            {
              "startLaneIndex": 0,
              "endLaneIndex": 2,
              "points": [
                {
                  "x": 11.0,
                  "y": 502.0
                },
                {
                  "x": 9.521,
                  "y": 501.735
                },
                {
                  "x": 7.408,
                  "y": 501.0
                },
                {
                  "x": 4.8469999999999995,
                  "y": 499.885
                },
                {
                  "x": 2.024,
                  "y": 498.48
                },
                {
                  "x": -0.875,
                  "y": 496.875
                },
                {
                  "x": -3.664,
                  "y": 495.15999999999997
                },
                {
                  "x": -6.156999999999999,
                  "y": 493.425
                },
                {
                  "x": -8.168,
                  "y": 491.7599999999999
                },
                {
                  "x": -9.511,
                  "y": 490.255
                },
                {
                  "x": -10.0,
                  "y": 489.0
                }
              ]
            }
          ]
        },
        {
          "type": "turn_left",
          "startRoad": "road_1_7_3",
          "endRoad": "road_1_6_0",
          "direction": 3,
          "laneLinks": [
            {
              "startLaneIndex": 0,
              "endLaneIndex": 0,
              "points": [
                {
                  "x": -2.0,
                  "y": 511.0
                },
                {
                  "x": -1.7349999999999999,
                  "y": 509.745
                },
                {
                  "x": -1.0,
                  "y": 508.24
                },
                {
                  "x": 0.115,
                  "y": 506.575
                },
                {
                  "x": 1.52,
                  "y": 504.84
                },
                {
                  "x": 3.125,
                  "y": 503.125
                },
                {
                  "x": 4.84,
                  "y": 501.52
                },
                {
                  "x": 6.575,
                  "y": 500.115
                },
                {
                  "x": 8.24,
                  "y": 498.9999999999999
                },
                {
                  "x": 9.745,
                  "y": 498.265
                },
                {
                  "x": 11.0,
                  "y": 498.0
                }
              ]
            },
            {
              "startLaneIndex": 0,
              "endLaneIndex": 1,
              "points": [
                {
                  "x": -2.0,
                  "y": 511.0
                },
                {
                  "x": -1.7349999999999999,
                  "y": 509.633
                },
                {
                  "x": -1.0,
                  "y": 507.824
                },
                {
                  "x": 0.115,
                  "y": 505.711
                },
                {
                  "x": 1.52,
                  "y": 503.432
                },
                {
                  "x": 3.125,
                  "y": 501.125
                },
                {
                  "x": 4.84,
                  "y": 498.928
                },
                {
                  "x": 6.575,
                  "y": 496.979
                },
                {
                  "x": 8.24,
                  "y": 495.4159999999999
                },
                {
                  "x": 9.745,
                  "y": 494.377
                },
                {
                  "x": 11.0,
                  "y": 494.0
                }
              ]
            },
            {
              "startLaneIndex": 0,
              "endLaneIndex": 2,
              "points": [
                {
                  "x": -2.0,
                  "y": 511.0
                },
                {
                  "x": -1.7349999999999999,
                  "y": 509.521
                },
                {
                  "x": -1.0,
                  "y": 507.408
                },
                {
                  "x": 0.115,
                  "y": 504.847
                },
                {
                  "x": 1.52,
                  "y": 502.024
                },
                {
                  "x": 3.125,
                  "y": 499.125
                },
                {
                  "x": 4.84,
                  "y": 496.336
                },
                {
                  "x": 6.575,
                  "y": 493.843
                },
                {
                  "x": 8.24,
                  "y": 491.8319999999999
                },
                {
                  "x": 9.745,
                  "y": 490.489
                },
                {
                  "x": 11.0,
                  "y": 490.0
                }
              ]
            }
          ]
        },
        {
          "type": "turn_right",
          "startRoad": "road_1_7_3",
          "endRoad": "road_1_6_2",
          "direction": 3,
          "laneLinks": [
            {
              "startLaneIndex": 2,
              "endLaneIndex": 0,
              "points": [
                {
                  "x": -10.0,
                  "y": 511.0
                },
                {
                  "x": -9.929,
                  "y": 509.85699999999997
                },
                {
                  "x": -9.752,
                  "y": 508.656
                },
                {
                  "x": -9.523,
                  "y": 507.439
                },
                {
                  "x": -9.296,
                  "y": 506.248
                },
                {
                  "x": -9.125,
                  "y": 505.125
                },
                {
                  "x": -9.064,
                  "y": 504.112
                },
                {
                  "x": -9.167,
                  "y": 503.251
                },
                {
                  "x": -9.488,
                  "y": 502.5839999999999
                },
                {
                  "x": -10.081,
                  "y": 502.153
                },
                {
                  "x": -11.0,
                  "y": 502.0
                }
              ]
            },
            {
              "startLaneIndex": 2,
              "endLaneIndex": 1,
              "points": [
                {
                  "x": -10.0,
                  "y": 511.0
                },
                {
                  "x": -9.929,
                  "y": 509.969
                },
                {
                  "x": -9.752,
                  "y": 509.072
                },
                {
                  "x": -9.523,
                  "y": 508.303
                },
                {
                  "x": -9.296,
                  "y": 507.656
                },
                {
                  "x": -9.125,
                  "y": 507.125
                },
                {
                  "x": -9.064,
                  "y": 506.704
                },
                {
                  "x": -9.167,
                  "y": 506.387
                },
                {
                  "x": -9.488,
                  "y": 506.1679999999999
                },
                {
                  "x": -10.081,
                  "y": 506.041
                },
                {
                  "x": -11.0,
                  "y": 506.0
                }
              ]
            },
            {
              "startLaneIndex": 2,
              "endLaneIndex": 2,
              "points": [
                {
                  "x": -10.0,
                  "y": 511.0
                },
                {
                  "x": -9.929,
                  "y": 510.081
                },
                {
                  "x": -9.752,
                  "y": 509.488
                },
                {
                  "x": -9.523,
                  "y": 509.167
                },
                {
                  "x": -9.296,
                  "y": 509.064
                },
                {
                  "x": -9.125,
                  "y": 509.125
                },
                {
                  "x": -9.064,
                  "y": 509.296
                },
                {
                  "x": -9.167,
                  "y": 509.523
                },
                {
                  "x": -9.488,
                  "y": 509.7519999999999
                },
                {
                  "x": -10.081,
                  "y": 509.929
                },
                {
                  "x": -11.0,
                  "y": 510.0
                }
              ]
            }
          ]
        },
        {
          "type": "go_straight",
          "startRoad": "road_1_7_3",
          "endRoad": "road_1_6_3",
          "direction": 3,
          "laneLinks": [
            {
              "startLaneIndex": 1,
              "endLaneIndex": 0,
              "points": [
                {
                  "x": -6.0,
                  "y": 511.0
                },
                {
                  "x": -5.888,
                  "y": 509.592
                },
                {
                  "x": -5.584,
                  "y": 507.656
                },
                {
                  "x": -5.136,
                  "y": 505.324
                },
                {
                  "x": -4.592,
                  "y": 502.728
                },
                {
                  "x": -4.0,
                  "y": 500.0
                },
                {
                  "x": -3.408,
                  "y": 497.272
                },
                {
                  "x": -2.864,
                  "y": 494.676
                },
                {
                  "x": -2.415999999999999,
                  "y": 492.3439999999999
                },
                {
                  "x": -2.112,
                  "y": 490.408
                },
                {
                  "x": -2.0,
                  "y": 489.0
                }
              ]
            },
            {
              "startLaneIndex": 1,
              "endLaneIndex": 1,
              "points": [
                {
                  "x": -6.0,
                  "y": 511.0
                },
                {
                  "x": -6.0,
                  "y": 509.592
                },
                {
                  "x": -6.0,
                  "y": 507.656
                },
                {
                  "x": -6.0,
                  "y": 505.324
                },
                {
                  "x": -6.0,
                  "y": 502.728
                },
                {
                  "x": -6.0,
                  "y": 500.0
                },
                {
                  "x": -6.0,
                  "y": 497.272
                },
                {
                  "x": -6.0,
                  "y": 494.676
                },
                {
                  "x": -5.999999999999999,
                  "y": 492.3439999999999
                },
                {
                  "x": -6.0,
                  "y": 490.408
                },
                {
                  "x": -6.0,
                  "y": 489.0
                }
              ]
            },
            {
              "startLaneIndex": 1,
              "endLaneIndex": 2,
              "points": [
                {
                  "x": -6.0,
                  "y": 511.0
                },
                {
                  "x": -6.112,
                  "y": 509.592
                },
                {
                  "x": -6.416,
                  "y": 507.656
                },
                {
                  "x": -6.864,
                  "y": 505.324
                },
                {
                  "x": -7.408,
                  "y": 502.728
                },
                {
                  "x": -8.0,
                  "y": 500.0
                },
                {
                  "x": -8.592,
                  "y": 497.272
                },
                {
                  "x": -9.136,
                  "y": 494.676
                },
                {
                  "x": -9.584,
                  "y": 492.3439999999999
                },
                {
                  "x": -9.888,
                  "y": 490.408
                },
                {
                  "x": -10.0,
                  "y": 489.0
                }
              ]
            }
          ]
        }
      ],
      "trafficLight": {
        "roadLinkIndices": [
          0,
          1,
          2,
          3,
          4,
          5,
          6,
          7,
          8,
          9,
          10,
          11
        ],
        "lightphases": [
          {
            "time": 5,
            "availableRoadLinks": [
              10,
              2,
              3,
              6
            ]
          },
          {
            "time": 30,
            "availableRoadLinks": [
              0,
              2,
              3,
              6,
              7,
              10
            ]
          },
          {
            "time": 30,
            "availableRoadLinks": [
              2,
              3,
              4,
              6,
              10,
              11
            ]
          },
          {
            "time": 30,
            "availableRoadLinks": [
              1,
              2,
              3,
              6,
              8,
              10
            ]
          },
          {
            "time": 30,
            "availableRoadLinks": [
              2,
              3,
              5,
              6,
              9,
              10
            ]
          },
          {
            "time": 30,
            "availableRoadLinks": [
              0,
              1,
              2,
              3,
              6,
              10
            ]
          },
          {
            "time": 30,
            "availableRoadLinks": [
              2,
              3,
              6,
              7,
              8,
              10
            ]
          },
          {
            "time": 30,
            "availableRoadLinks": [
              2,
              3,
              4,
              5,
              6,
              10
            ]
          },
          {
            "time": 30,
            "availableRoadLinks": [
              2,
              3,
              6,
              9,
              10,
              11
            ]
          }
        ]
      },
      "virtual": false
    },
    {
      "id": "intersection_1_7",
      "point": {
        "x": 0,
        "y": 600
      },
      "width": 11,
      "roads": [
        "road_0_7_0",
        "road_1_6_1",
        "road_2_7_2",
        "road_1_8_3",
        "road_1_7_0",
        "road_1_7_1",
        "road_1_7_2",
        "road_1_7_3"
      ],
      "roadLinks": [
        {
          "type": "go_straight",
          "startRoad": "road_0_7_0",
          "endRoad": "road_1_7_0",
          "direction": 0,
          "laneLinks": [
            {
              "startLaneIndex": 1,
              "endLaneIndex": 0,
              "points": [
                {
                  "x": -11.0,
                  "y": 594.0
                },
                {
                  "x": -9.592,
                  "y": 594.112
                },
                {
                  "x": -7.656,
                  "y": 594.4159999999999
                },
                {
                  "x": -5.324,
                  "y": 594.864
                },
                {
                  "x": -2.7279999999999998,
                  "y": 595.408
                },
                {
                  "x": 0.0,
                  "y": 596.0
                },
                {
                  "x": 2.7279999999999998,
                  "y": 596.592
                },
                {
                  "x": 5.323999999999999,
                  "y": 597.136
                },
                {
                  "x": 7.655999999999999,
                  "y": 597.584
                },
                {
                  "x": 9.592,
                  "y": 597.888
                },
                {
                  "x": 11.0,
                  "y": 598.0
                }
              ]
            },
            {
              "startLaneIndex": 1,
              "endLaneIndex": 1,
              "points": [
                {
                  "x": -11.0,
                  "y": 594.0
                },
                {
                  "x": -9.592,
                  "y": 594.0
                },
                {
                  "x": -7.656,
                  "y": 594.0
                },
                {
                  "x": -5.324,
                  "y": 594.0
                },
                {
                  "x": -2.7279999999999998,
                  "y": 594.0
                },
                {
                  "x": 0.0,
                  "y": 594.0
                },
                {
                  "x": 2.7279999999999998,
                  "y": 594.0
                },
                {
                  "x": 5.323999999999999,
                  "y": 594.0
                },
                {
                  "x": 7.655999999999999,
                  "y": 593.9999999999999
                },
                {
                  "x": 9.592,
                  "y": 594.0
                },
                {
                  "x": 11.0,
                  "y": 594.0
                }
              ]
            },
            {
              "startLaneIndex": 1,
              "endLaneIndex": 2,
              "points": [
                {
                  "x": -11.0,
                  "y": 594.0
                },
                {
                  "x": -9.592,
                  "y": 593.888
                },
                {
                  "x": -7.656,
                  "y": 593.584
                },
                {
                  "x": -5.324,
                  "y": 593.136
                },
                {
                  "x": -2.7279999999999998,
                  "y": 592.592
                },
                {
                  "x": 0.0,
                  "y": 592.0
                },
                {
                  "x": 2.7279999999999998,
                  "y": 591.408
                },
                {
                  "x": 5.323999999999999,
                  "y": 590.864
                },
                {
                  "x": 7.655999999999999,
                  "y": 590.4159999999999
                },
                {
                  "x": 9.592,
                  "y": 590.112
                },
                {
                  "x": 11.0,
                  "y": 590.0
                }
              ]
            }
          ]
        },
        {
          "type": "turn_left",
          "startRoad": "road_0_7_0",
          "endRoad": "road_1_7_1",
          "direction": 0,
          "laneLinks": [
            {
              "startLaneIndex": 0,
              "endLaneIndex": 0,
              "points": [
                {
                  "x": -11.0,
                  "y": 598.0
                },
                {
                  "x": -9.745,
                  "y": 598.265
                },
                {
                  "x": -8.24,
                  "y": 599.0
                },
                {
                  "x": -6.575,
                  "y": 600.115
                },
                {
                  "x": -4.84,
                  "y": 601.52
                },
                {
                  "x": -3.125,
                  "y": 603.125
                },
                {
                  "x": -1.52,
                  "y": 604.84
                },
                {
                  "x": -0.115000000000001,
                  "y": 606.575
                },
                {
                  "x": 0.999999999999999,
                  "y": 608.2399999999999
                },
                {
                  "x": 1.735,
                  "y": 609.745
                },
                {
                  "x": 2.0,
                  "y": 611.0
                }
              ]
            },
            {
              "startLaneIndex": 0,
              "endLaneIndex": 1,
              "points": [
                {
                  "x": -11.0,
                  "y": 598.0
                },
                {
                  "x": -9.633,
                  "y": 598.265
                },
                {
                  "x": -7.824,
                  "y": 599.0
                },
                {
                  "x": -5.711,
                  "y": 600.115
                },
                {
                  "x": -3.432,
                  "y": 601.52
                },
                {
                  "x": -1.125,
                  "y": 603.125
                },
                {
                  "x": 1.072,
                  "y": 604.84
                },
                {
                  "x": 3.020999999999999,
                  "y": 606.575
                },
                {
                  "x": 4.583999999999999,
                  "y": 608.2399999999999
                },
                {
                  "x": 5.623,
                  "y": 609.745
                },
                {
                  "x": 6.0,
                  "y": 611.0
                }
              ]
            },
            {
              "startLaneIndex": 0,
              "endLaneIndex": 2,
              "points": [
                {
                  "x": -11.0,
                  "y": 598.0
                },
                {
                  "x": -9.521,
                  "y": 598.265
                },
                {
                  "x": -7.408,
                  "y": 599.0
                },
                {
                  "x": -4.8469999999999995,
                  "y": 600.115
                },
                {
                  "x": -2.024,
                  "y": 601.52
                },
                {
                  "x": 0.875,
                  "y": 603.125
                },
                {
                  "x": 3.664,
                  "y": 604.84
                },
                {
                  "x": 6.156999999999999,
                  "y": 606.575
                },
                {
                  "x": 8.168,
                  "y": 608.2399999999999
                },
                {
                  "x": 9.511,
                  "y": 609.745
                },
                {
                  "x": 10.0,
                  "y": 611.0
                }
              ]
            }
          ]
        },
        {
          "type": "turn_right",
          "startRoad": "road_0_7_0",
          "endRoad": "road_1_7_3",
          "direction": 0,
          "laneLinks": [
            {
              "startLaneIndex": 2,
              "endLaneIndex": 0,
              "points": [
                {
                  "x": -11.0,
                  "y": 590.0
                },
                {
                  "x": -9.857,
                  "y": 590.071
                },
                {
                  "x": -8.656,
                  "y": 590.248
                },
                {
                  "x": -7.439,
                  "y": 590.477
                },
                {
                  "x": -6.248,
                  "y": 590.704
                },
                {
                  "x": -5.125,
                  "y": 590.875
                },
                {
                  "x": -4.112,
                  "y": 590.936
                },
                {
                  "x": -3.251000000000001,
                  "y": 590.833
                },
                {
                  "x": -2.584000000000001,
                  "y": 590.512
                },
                {
                  "x": -2.153,
                  "y": 589.919
                },
                {
                  "x": -2.0,
                  "y": 589.0
                }
              ]
            },
            {
              "startLaneIndex": 2,
              "endLaneIndex": 1,
              "points": [
                {
                  "x": -11.0,
                  "y": 590.0
                },
                {
                  "x": -9.969,
                  "y": 590.071
                },
                {
                  "x": -9.072,
                  "y": 590.248
                },
                {
                  "x": -8.303,
                  "y": 590.477
                },
                {
                  "x": -7.656,
                  "y": 590.704
                },
                {
                  "x": -7.125,
                  "y": 590.875
                },
                {
                  "x": -6.704,
                  "y": 590.936
                },
                {
                  "x": -6.387000000000001,
                  "y": 590.833
                },
                {
                  "x": -6.168000000000001,
                  "y": 590.512
                },
                {
                  "x": -6.0409999999999995,
                  "y": 589.919
                },
                {
                  "x": -6.0,
                  "y": 589.0
                }
              ]
            },
            {
              "startLaneIndex": 2,
              "endLaneIndex": 2,
              "points": [
                {
                  "x": -11.0,
                  "y": 590.0
                },
                {
                  "x": -10.081,
                  "y": 590.071
                },
                {
                  "x": -9.488,
                  "y": 590.248
                },
                {
                  "x": -9.167,
                  "y": 590.477
                },
                {
                  "x": -9.064,
                  "y": 590.704
                },
                {
                  "x": -9.125,
                  "y": 590.875
                },
                {
                  "x": -9.296,
                  "y": 590.936
                },
                {
                  "x": -9.523000000000001,
                  "y": 590.833
                },
                {
                  "x": -9.752,
                  "y": 590.512
                },
                {
                  "x": -9.929,
                  "y": 589.919
                },
                {
                  "x": -10.0,
                  "y": 589.0
                }
              ]
            }
          ]
        },
        {
          "type": "turn_right",
          "startRoad": "road_1_6_1",
          "endRoad": "road_1_7_0",
          "direction": 1,
          "laneLinks": [
            {
              "startLaneIndex": 2,
              "endLaneIndex": 0,
              "points": [
                {
                  "x": 10.0,
                  "y": 589.0
                },
                {
                  "x": 9.929,
                  "y": 590.143
                },
                {
                  "x": 9.752,
                  "y": 591.344
                },
                {
                  "x": 9.523,
                  "y": 592.561
                },
                {
                  "x": 9.296,
                  "y": 593.752
                },
                {
                  "x": 9.125,
                  "y": 594.875
                },
                {
                  "x": 9.064,
                  "y": 595.888
                },
                {
                  "x": 9.167,
                  "y": 596.749
                },
                {
                  "x": 9.488,
                  "y": 597.4159999999999
                },
                {
                  "x": 10.081,
                  "y": 597.847
                },
                {
                  "x": 11.0,
                  "y": 598.0
                }
              ]
            },
            {
              "startLaneIndex": 2,
              "endLaneIndex": 1,
              "points": [
                {
                  "x": 10.0,
                  "y": 589.0
                },
                {
                  "x": 9.929,
                  "y": 590.031
                },
                {
                  "x": 9.752,
                  "y": 590.928
                },
                {
                  "x": 9.523,
                  "y": 591.697
                },
                {
                  "x": 9.296,
                  "y": 592.344
                },
                {
                  "x": 9.125,
                  "y": 592.875
                },
                {
                  "x": 9.064,
                  "y": 593.296
                },
                {
                  "x": 9.167,
                  "y": 593.6129999999999
                },
                {
                  "x": 9.488,
                  "y": 593.8319999999999
                },
                {
                  "x": 10.081,
                  "y": 593.959
                },
                {
                  "x": 11.0,
                  "y": 594.0
                }
              ]
            },
            {
              "startLaneIndex": 2,
              "endLaneIndex": 2,
              "points": [
                {
                  "x": 10.0,
                  "y": 589.0
                },
                {
                  "x": 9.929,
                  "y": 589.919
                },
                {
                  "x": 9.752,
                  "y": 590.512
                },
                {
                  "x": 9.523,
                  "y": 590.833
                },
                {
                  "x": 9.296,
                  "y": 590.936
                },
                {
                  "x": 9.125,
                  "y": 590.875
                },
                {
                  "x": 9.064,
                  "y": 590.704
                },
                {
                  "x": 9.167,
                  "y": 590.477
                },
                {
                  "x": 9.488,
                  "y": 590.2479999999999
                },
                {
                  "x": 10.081,
                  "y": 590.071
                },
                {
                  "x": 11.0,
                  "y": 590.0
                }
              ]
            }
          ]
        },
        {
          "type": "go_straight",
          "startRoad": "road_1_6_1",
          "endRoad": "road_1_7_1",
          "direction": 1,
          "laneLinks": [
            {
              "startLaneIndex": 1,
              "endLaneIndex": 0,
              "points": [
                {
                  "x": 6.0,
                  "y": 589.0
                },
                {
                  "x": 5.888,
                  "y": 590.408
                },
                {
                  "x": 5.584,
                  "y": 592.344
                },
                {
                  "x": 5.136,
                  "y": 594.676
                },
                {
                  "x": 4.592,
                  "y": 597.272
                },
                {
                  "x": 4.0,
                  "y": 600.0
                },
                {
                  "x": 3.408,
                  "y": 602.728
                },
                {
                  "x": 2.864,
                  "y": 605.324
                },
                {
                  "x": 2.415999999999999,
                  "y": 607.656
                },
                {
                  "x": 2.112,
                  "y": 609.592
                },
                {
                  "x": 2.0,
                  "y": 611.0
                }
              ]
            },
            {
              "startLaneIndex": 1,
              "endLaneIndex": 1,
              "points": [
                {
                  "x": 6.0,
                  "y": 589.0
                },
                {
                  "x": 6.0,
                  "y": 590.408
                },
                {
                  "x": 6.0,
                  "y": 592.344
                },
                {
                  "x": 6.0,
                  "y": 594.676
                },
                {
                  "x": 6.0,
                  "y": 597.272
                },
                {
                  "x": 6.0,
                  "y": 600.0
                },
                {
                  "x": 6.0,
                  "y": 602.728
                },
                {
                  "x": 6.0,
                  "y": 605.324
                },
                {
                  "x": 5.999999999999999,
                  "y": 607.656
                },
                {
                  "x": 6.0,
                  "y": 609.592
                },
                {
                  "x": 6.0,
                  "y": 611.0
                }
              ]
            },
            {
              "startLaneIndex": 1,
              "endLaneIndex": 2,
              "points": [
                {
                  "x": 6.0,
                  "y": 589.0
                },
                {
                  "x": 6.112,
                  "y": 590.408
                },
                {
                  "x": 6.416,
                  "y": 592.344
                },
                {
                  "x": 6.864,
                  "y": 594.676
                },
                {
                  "x": 7.408,
                  "y": 597.272
                },
                {
                  "x": 8.0,
                  "y": 600.0
                },
                {
                  "x": 8.592,
                  "y": 602.728
                },
                {
                  "x": 9.136,
                  "y": 605.324
                },
                {
                  "x": 9.584,
                  "y": 607.656
                },
                {
                  "x": 9.888,
                  "y": 609.592
                },
                {
                  "x": 10.0,
                  "y": 611.0
                }
              ]
            }
          ]
        },
        {
          "type": "turn_left",
          "startRoad": "road_1_6_1",
          "endRoad": "road_1_7_2",
          "direction": 1,
          "laneLinks": [
            {
              "startLaneIndex": 0,
              "endLaneIndex": 0,
              "points": [
                {
                  "x": 2.0,
                  "y": 589.0
                },
                {
                  "x": 1.7349999999999999,
                  "y": 590.255
                },
                {
                  "x": 1.0,
                  "y": 591.76
                },
                {
                  "x": -0.115,
                  "y": 593.425
                },
                {
                  "x": -1.52,
                  "y": 595.16
                },
                {
                  "x": -3.125,
                  "y": 596.875
                },
                {
                  "x": -4.84,
                  "y": 598.48
                },
                {
                  "x": -6.575,
                  "y": 599.885
                },
                {
                  "x": -8.24,
                  "y": 600.9999999999999
                },
                {
                  "x": -9.745,
                  "y": 601.735
                },
                {
                  "x": -11.0,
                  "y": 602.0
                }
              ]
            },
            {
              "startLaneIndex": 0,
              "endLaneIndex": 1,
              "points": [
                {
                  "x": 2.0,
                  "y": 589.0
                },
                {
                  "x": 1.7349999999999999,
                  "y": 590.367
                },
                {
                  "x": 1.0,
                  "y": 592.176
                },
                {
                  "x": -0.115,
                  "y": 594.289
                },
                {
                  "x": -1.52,
                  "y": 596.568
                },
                {
                  "x": -3.125,
                  "y": 598.875
                },
                {
                  "x": -4.84,
                  "y": 601.072
                },
                {
                  "x": -6.575,
                  "y": 603.021
                },
                {
                  "x": -8.24,
                  "y": 604.584
                },
                {
                  "x": -9.745,
                  "y": 605.623
                },
                {
                  "x": -11.0,
                  "y": 606.0
                }
              ]
            },
            {
              "startLaneIndex": 0,
              "endLaneIndex": 2,
              "points": [
                {
                  "x": 2.0,
                  "y": 589.0
                },
                {
                  "x": 1.7349999999999999,
                  "y": 590.479
                },
                {
                  "x": 1.0,
                  "y": 592.592
                },
                {
                  "x": -0.115,
                  "y": 595.153
                },
                {
                  "x": -1.52,
                  "y": 597.976
                },
                {
                  "x": -3.125,
                  "y": 600.875
                },
                {
                  "x": -4.84,
                  "y": 603.664
                },
                {
                  "x": -6.575,
                  "y": 606.157
                },
                {
                  "x": -8.24,
                  "y": 608.1679999999999
                },
                {
                  "x": -9.745,
                  "y": 609.511
                },
                {
                  "x": -11.0,
                  "y": 610.0
                }
              ]
            }
          ]
        },
        {
          "type": "turn_right",
          "startRoad": "road_2_7_2",
          "endRoad": "road_1_7_1",
          "direction": 2,
          "laneLinks": [
            {
              "startLaneIndex": 2,
              "endLaneIndex": 0,
              "points": [
                {
                  "x": 11.0,
                  "y": 610.0
                },
                {
                  "x": 9.857,
                  "y": 609.929
                },
                {
                  "x": 8.656,
                  "y": 609.752
                },
                {
                  "x": 7.439,
                  "y": 609.523
                },
                {
                  "x": 6.248,
                  "y": 609.296
                },
                {
                  "x": 5.125,
                  "y": 609.125
                },
                {
                  "x": 4.112,
                  "y": 609.064
                },
                {
                  "x": 3.251000000000001,
                  "y": 609.167
                },
                {
                  "x": 2.584000000000001,
                  "y": 609.4879999999999
                },
                {
                  "x": 2.153,
                  "y": 610.081
                },
                {
                  "x": 2.0,
                  "y": 611.0
                }
              ]
            },
            {
              "startLaneIndex": 2,
              "endLaneIndex": 1,
              "points": [
                {
                  "x": 11.0,
                  "y": 610.0
                },
                {
                  "x": 9.969,
                  "y": 609.929
                },
                {
                  "x": 9.072,
                  "y": 609.752
                },
                {
                  "x": 8.303,
                  "y": 609.523
                },
                {
                  "x": 7.656,
                  "y": 609.296
                },
                {
                  "x": 7.125,
                  "y": 609.125
                },
                {
                  "x": 6.704,
                  "y": 609.064
                },
                {
                  "x": 6.387000000000001,
                  "y": 609.167
                },
                {
                  "x": 6.168000000000001,
                  "y": 609.4879999999999
                },
                {
                  "x": 6.0409999999999995,
                  "y": 610.081
                },
                {
                  "x": 6.0,
                  "y": 611.0
                }
              ]
            },
            {
              "startLaneIndex": 2,
              "endLaneIndex": 2,
              "points": [
                {
                  "x": 11.0,
                  "y": 610.0
                },
                {
                  "x": 10.081,
                  "y": 609.929
                },
                {
                  "x": 9.488,
                  "y": 609.752
                },
                {
                  "x": 9.167,
                  "y": 609.523
                },
                {
                  "x": 9.064,
                  "y": 609.296
                },
                {
                  "x": 9.125,
                  "y": 609.125
                },
                {
                  "x": 9.296,
                  "y": 609.064
                },
                {
                  "x": 9.523000000000001,
                  "y": 609.167
                },
                {
                  "x": 9.752,
                  "y": 609.4879999999999
                },
                {
                  "x": 9.929,
                  "y": 610.081
                },
                {
                  "x": 10.0,
                  "y": 611.0
                }
              ]
            }
          ]
        },
        {
          "type": "go_straight",
          "startRoad": "road_2_7_2",
          "endRoad": "road_1_7_2",
          "direction": 2,
          "laneLinks": [
            {
              "startLaneIndex": 1,
              "endLaneIndex": 0,
              "points": [
                {
                  "x": 11.0,
                  "y": 606.0
                },
                {
                  "x": 9.592,
                  "y": 605.888
                },
                {
                  "x": 7.656,
                  "y": 605.584
                },
                {
                  "x": 5.324,
                  "y": 605.136
                },
                {
                  "x": 2.7279999999999998,
                  "y": 604.592
                },
                {
                  "x": 0.0,
                  "y": 604.0
                },
                {
                  "x": -2.7279999999999998,
                  "y": 603.408
                },
                {
                  "x": -5.323999999999999,
                  "y": 602.864
                },
                {
                  "x": -7.655999999999999,
                  "y": 602.4159999999999
                },
                {
                  "x": -9.592,
                  "y": 602.112
                },
                {
                  "x": -11.0,
                  "y": 602.0
                }
              ]
            },
            {
              "startLaneIndex": 1,
              "endLaneIndex": 1,
              "points": [
                {
                  "x": 11.0,
                  "y": 606.0
                },
                {
                  "x": 9.592,
                  "y": 606.0
                },
                {
                  "x": 7.656,
                  "y": 606.0
                },
                {
                  "x": 5.324,
                  "y": 606.0
                },
                {
                  "x": 2.7279999999999998,
                  "y": 606.0
                },
                {
                  "x": 0.0,
                  "y": 606.0
                },
                {
                  "x": -2.7279999999999998,
                  "y": 606.0
                },
                {
                  "x": -5.323999999999999,
                  "y": 606.0
                },
                {
                  "x": -7.655999999999999,
                  "y": 605.9999999999999
                },
                {
                  "x": -9.592,
                  "y": 606.0
                },
                {
                  "x": -11.0,
                  "y": 606.0
                }
              ]
            },
            {
              "startLaneIndex": 1,
              "endLaneIndex": 2,
              "points": [
                {
                  "x": 11.0,
                  "y": 606.0
                },
                {
                  "x": 9.592,
                  "y": 606.112
                },
                {
                  "x": 7.656,
                  "y": 606.4159999999999
                },
                {
                  "x": 5.324,
                  "y": 606.864
                },
                {
                  "x": 2.7279999999999998,
                  "y": 607.408
                },
                {
                  "x": 0.0,
                  "y": 608.0
                },
                {
                  "x": -2.7279999999999998,
                  "y": 608.592
                },
                {
                  "x": -5.323999999999999,
                  "y": 609.136
                },
                {
                  "x": -7.655999999999999,
                  "y": 609.584
                },
                {
                  "x": -9.592,
                  "y": 609.888
                },
                {
                  "x": -11.0,
                  "y": 610.0
                }
              ]
            }
          ]
        },
        {
          "type": "turn_left",
          "startRoad": "road_2_7_2",
          "endRoad": "road_1_7_3",
          "direction": 2,
          "laneLinks": [
            {
              "startLaneIndex": 0,
              "endLaneIndex": 0,
              "points": [
                {
                  "x": 11.0,
                  "y": 602.0
                },
                {
                  "x": 9.745,
                  "y": 601.735
                },
                {
                  "x": 8.24,
                  "y": 601.0
                },
                {
                  "x": 6.575,
                  "y": 599.885
                },
                {
                  "x": 4.84,
                  "y": 598.48
                },
                {
                  "x": 3.125,
                  "y": 596.875
                },
                {
                  "x": 1.52,
                  "y": 595.16
                },
                {
                  "x": 0.115000000000001,
                  "y": 593.425
                },
                {
                  "x": -0.999999999999999,
                  "y": 591.7599999999999
                },
                {
                  "x": -1.735,
                  "y": 590.255
                },
                {
                  "x": -2.0,
                  "y": 589.0
                }
              ]
            },
            {
              "startLaneIndex": 0,
              "endLaneIndex": 1,
              "points": [
                {
                  "x": 11.0,
                  "y": 602.0
                },
                {
                  "x": 9.633,
                  "y": 601.735
                },
                {
                  "x": 7.824,
                  "y": 601.0
                },
                {
                  "x": 5.711,
                  "y": 599.885
                },
                {
                  "x": 3.432,
                  "y": 598.48
                },
                {
                  "x": 1.125,
                  "y": 596.875
                },
                {
                  "x": -1.072,
                  "y": 595.16
                },
                {
                  "x": -3.020999999999999,
                  "y": 593.425
                },
                {
                  "x": -4.583999999999999,
                  "y": 591.7599999999999
                },
                {
                  "x": -5.623,
                  "y": 590.255
                },
                {
                  "x": -6.0,
                  "y": 589.0
                }
              ]
            },
            {
              "startLaneIndex": 0,
              "endLaneIndex": 2,
              "points": [
                {
                  "x": 11.0,
                  "y": 602.0
                },
                {
                  "x": 9.521,
                  "y": 601.735
                },
                {
                  "x": 7.408,
                  "y": 601.0
                },
                {
                  "x": 4.8469999999999995,
                  "y": 599.885
                },
                {
                  "x": 2.024,
                  "y": 598.48
                },
                {
                  "x": -0.875,
                  "y": 596.875
                },
                {
                  "x": -3.664,
                  "y": 595.16
                },
                {
                  "x": -6.156999999999999,
                  "y": 593.425
                },
                {
                  "x": -8.168,
                  "y": 591.7599999999999
                },
                {
                  "x": -9.511,
                  "y": 590.255
                },
                {
                  "x": -10.0,
                  "y": 589.0
                }
              ]
            }
          ]
        },
        {
          "type": "turn_left",
          "startRoad": "road_1_8_3",
          "endRoad": "road_1_7_0",
          "direction": 3,
          "laneLinks": [
            {
              "startLaneIndex": 0,
              "endLaneIndex": 0,
              "points": [
                {
                  "x": -2.0,
                  "y": 611.0
                },
                {
                  "x": -1.7349999999999999,
                  "y": 609.745
                },
                {
                  "x": -1.0,
                  "y": 608.24
                },
                {
                  "x": 0.115,
                  "y": 606.575
                },
                {
                  "x": 1.52,
                  "y": 604.84
                },
                {
                  "x": 3.125,
                  "y": 603.125
                },
                {
                  "x": 4.84,
                  "y": 601.52
                },
                {
                  "x": 6.575,
                  "y": 600.115
                },
                {
                  "x": 8.24,
                  "y": 598.9999999999999
                },
                {
                  "x": 9.745,
                  "y": 598.265
                },
                {
                  "x": 11.0,
                  "y": 598.0
                }
              ]
            },
            {
              "startLaneIndex": 0,
              "endLaneIndex": 1,
              "points": [
                {
                  "x": -2.0,
                  "y": 611.0
                },
                {
                  "x": -1.7349999999999999,
                  "y": 609.633
                },
                {
                  "x": -1.0,
                  "y": 607.824
                },
                {
                  "x": 0.115,
                  "y": 605.711
                },
                {
                  "x": 1.52,
                  "y": 603.432
                },
                {
                  "x": 3.125,
                  "y": 601.125
                },
                {
                  "x": 4.84,
                  "y": 598.928
                },
                {
                  "x": 6.575,
                  "y": 596.979
                },
                {
                  "x": 8.24,
                  "y": 595.4159999999999
                },
                {
                  "x": 9.745,
                  "y": 594.377
                },
                {
                  "x": 11.0,
                  "y": 594.0
                }
              ]
            },
            {
              "startLaneIndex": 0,
              "endLaneIndex": 2,
              "points": [
                {
                  "x": -2.0,
                  "y": 611.0
                },
                {
                  "x": -1.7349999999999999,
                  "y": 609.521
                },
                {
                  "x": -1.0,
                  "y": 607.408
                },
                {
                  "x": 0.115,
                  "y": 604.847
                },
                {
                  "x": 1.52,
                  "y": 602.024
                },
                {
                  "x": 3.125,
                  "y": 599.125
                },
                {
                  "x": 4.84,
                  "y": 596.336
                },
                {
                  "x": 6.575,
                  "y": 593.843
                },
                {
                  "x": 8.24,
                  "y": 591.8319999999999
                },
                {
                  "x": 9.745,
                  "y": 590.489
                },
                {
                  "x": 11.0,
                  "y": 590.0
                }
              ]
            }
          ]
        },
        {
          "type": "turn_right",
          "startRoad": "road_1_8_3",
          "endRoad": "road_1_7_2",
          "direction": 3,
          "laneLinks": [
            {
              "startLaneIndex": 2,
              "endLaneIndex": 0,
              "points": [
                {
                  "x": -10.0,
                  "y": 611.0
                },
                {
                  "x": -9.929,
                  "y": 609.857
                },
                {
                  "x": -9.752,
                  "y": 608.656
                },
                {
                  "x": -9.523,
                  "y": 607.439
                },
                {
                  "x": -9.296,
                  "y": 606.248
                },
                {
                  "x": -9.125,
                  "y": 605.125
                },
                {
                  "x": -9.064,
                  "y": 604.112
                },
                {
                  "x": -9.167,
                  "y": 603.251
                },
                {
                  "x": -9.488,
                  "y": 602.584
                },
                {
                  "x": -10.081,
                  "y": 602.153
                },
                {
                  "x": -11.0,
                  "y": 602.0
                }
              ]
            },
            {
              "startLaneIndex": 2,
              "endLaneIndex": 1,
              "points": [
                {
                  "x": -10.0,
                  "y": 611.0
                },
                {
                  "x": -9.929,
                  "y": 609.969
                },
                {
                  "x": -9.752,
                  "y": 609.072
                },
                {
                  "x": -9.523,
                  "y": 608.303
                },
                {
                  "x": -9.296,
                  "y": 607.656
                },
                {
                  "x": -9.125,
                  "y": 607.125
                },
                {
                  "x": -9.064,
                  "y": 606.704
                },
                {
                  "x": -9.167,
                  "y": 606.387
                },
                {
                  "x": -9.488,
                  "y": 606.1679999999999
                },
                {
                  "x": -10.081,
                  "y": 606.0409999999999
                },
                {
                  "x": -11.0,
                  "y": 606.0
                }
              ]
            },
            {
              "startLaneIndex": 2,
              "endLaneIndex": 2,
              "points": [
                {
                  "x": -10.0,
                  "y": 611.0
                },
                {
                  "x": -9.929,
                  "y": 610.081
                },
                {
                  "x": -9.752,
                  "y": 609.488
                },
                {
                  "x": -9.523,
                  "y": 609.167
                },
                {
                  "x": -9.296,
                  "y": 609.064
                },
                {
                  "x": -9.125,
                  "y": 609.125
                },
                {
                  "x": -9.064,
                  "y": 609.296
                },
                {
                  "x": -9.167,
                  "y": 609.523
                },
                {
                  "x": -9.488,
                  "y": 609.752
                },
                {
                  "x": -10.081,
                  "y": 609.929
                },
                {
                  "x": -11.0,
                  "y": 610.0
                }
              ]
            }
          ]
        },
        {
          "type": "go_straight",
          "startRoad": "road_1_8_3",
          "endRoad": "road_1_7_3",
          "direction": 3,
          "laneLinks": [
            {
              "startLaneIndex": 1,
              "endLaneIndex": 0,
              "points": [
                {
                  "x": -6.0,
                  "y": 611.0
                },
                {
                  "x": -5.888,
                  "y": 609.592
                },
                {
                  "x": -5.584,
                  "y": 607.656
                },
                {
                  "x": -5.136,
                  "y": 605.324
                },
                {
                  "x": -4.592,
                  "y": 602.728
                },
                {
                  "x": -4.0,
                  "y": 600.0
                },
                {
                  "x": -3.408,
                  "y": 597.272
                },
                {
                  "x": -2.864,
                  "y": 594.676
                },
                {
                  "x": -2.415999999999999,
                  "y": 592.3439999999999
                },
                {
                  "x": -2.112,
                  "y": 590.408
                },
                {
                  "x": -2.0,
                  "y": 589.0
                }
              ]
            },
            {
              "startLaneIndex": 1,
              "endLaneIndex": 1,
              "points": [
                {
                  "x": -6.0,
                  "y": 611.0
                },
                {
                  "x": -6.0,
                  "y": 609.592
                },
                {
                  "x": -6.0,
                  "y": 607.656
                },
                {
                  "x": -6.0,
                  "y": 605.324
                },
                {
                  "x": -6.0,
                  "y": 602.728
                },
                {
                  "x": -6.0,
                  "y": 600.0
                },
                {
                  "x": -6.0,
                  "y": 597.272
                },
                {
                  "x": -6.0,
                  "y": 594.676
                },
                {
                  "x": -5.999999999999999,
                  "y": 592.3439999999999
                },
                {
                  "x": -6.0,
                  "y": 590.408
                },
                {
                  "x": -6.0,
                  "y": 589.0
                }
              ]
            },
            {
              "startLaneIndex": 1,
              "endLaneIndex": 2,
              "points": [
                {
                  "x": -6.0,
                  "y": 611.0
                },
                {
                  "x": -6.112,
                  "y": 609.592
                },
                {
                  "x": -6.416,
                  "y": 607.656
                },
                {
                  "x": -6.864,
                  "y": 605.324
                },
                {
                  "x": -7.408,
                  "y": 602.728
                },
                {
                  "x": -8.0,
                  "y": 600.0
                },
                {
                  "x": -8.592,
                  "y": 597.272
                },
                {
                  "x": -9.136,
                  "y": 594.676
                },
                {
                  "x": -9.584,
                  "y": 592.3439999999999
                },
                {
                  "x": -9.888,
                  "y": 590.408
                },
                {
                  "x": -10.0,
                  "y": 589.0
                }
              ]
            }
          ]
        }
      ],
      "trafficLight": {
        "roadLinkIndices": [
          0,
          1,
          2,
          3,
          4,
          5,
          6,
          7,
          8,
          9,
          10,
          11
        ],
        "lightphases": [
          {
            "time": 5,
            "availableRoadLinks": [
              10,
              2,
              3,
              6
            ]
          },
          {
            "time": 30,
            "availableRoadLinks": [
              0,
              2,
              3,
              6,
              7,
              10
            ]
          },
          {
            "time": 30,
            "availableRoadLinks": [
              2,
              3,
              4,
              6,
              10,
              11
            ]
          },
          {
            "time": 30,
            "availableRoadLinks": [
              1,
              2,
              3,
              6,
              8,
              10
            ]
          },
          {
            "time": 30,
            "availableRoadLinks": [
              2,
              3,
              5,
              6,
              9,
              10
            ]
          },
          {
            "time": 30,
            "availableRoadLinks": [
              0,
              1,
              2,
              3,
              6,
              10
            ]
          },
          {
            "time": 30,
            "availableRoadLinks": [
              2,
              3,
              6,
              7,
              8,
              10
            ]
          },
          {
            "time": 30,
            "availableRoadLinks": [
              2,
              3,
              4,
              5,
              6,
              10
            ]
          },
          {
            "time": 30,
            "availableRoadLinks": [
              2,
              3,
              6,
              9,
              10,
              11
            ]
          }
        ]
      },
      "virtual": false
    },
    {
      "id": "intersection_1_8",
      "point": {
        "x": 0,
        "y": 700
      },
      "width": 11,
      "roads": [
        "road_0_8_0",
        "road_1_7_1",
        "road_2_8_2",
        "road_1_9_3",
        "road_1_8_0",
        "road_1_8_1",
        "road_1_8_2",
        "road_1_8_3"
      ],
      "roadLinks": [
        {
          "type": "go_straight",
          "startRoad": "road_0_8_0",
          "endRoad": "road_1_8_0",
          "direction": 0,
          "laneLinks": [
            {
              "startLaneIndex": 1,
              "endLaneIndex": 0,
              "points": [
                {
                  "x": -11.0,
                  "y": 694.0
                },
                {
                  "x": -9.592,
                  "y": 694.112
                },
                {
                  "x": -7.656,
                  "y": 694.4159999999999
                },
                {
                  "x": -5.324,
                  "y": 694.864
                },
                {
                  "x": -2.7279999999999998,
                  "y": 695.408
                },
                {
                  "x": 0.0,
                  "y": 696.0
                },
                {
                  "x": 2.7279999999999998,
                  "y": 696.592
                },
                {
                  "x": 5.323999999999999,
                  "y": 697.136
                },
                {
                  "x": 7.655999999999999,
                  "y": 697.584
                },
                {
                  "x": 9.592,
                  "y": 697.888
                },
                {
                  "x": 11.0,
                  "y": 698.0
                }
              ]
            },
            {
              "startLaneIndex": 1,
              "endLaneIndex": 1,
              "points": [
                {
                  "x": -11.0,
                  "y": 694.0
                },
                {
                  "x": -9.592,
                  "y": 694.0
                },
                {
                  "x": -7.656,
                  "y": 694.0
                },
                {
                  "x": -5.324,
                  "y": 694.0
                },
                {
                  "x": -2.7279999999999998,
                  "y": 694.0
                },
                {
                  "x": 0.0,
                  "y": 694.0
                },
                {
                  "x": 2.7279999999999998,
                  "y": 694.0
                },
                {
                  "x": 5.323999999999999,
                  "y": 694.0
                },
                {
                  "x": 7.655999999999999,
                  "y": 693.9999999999999
                },
                {
                  "x": 9.592,
                  "y": 694.0
                },
                {
                  "x": 11.0,
                  "y": 694.0
                }
              ]
            },
            {
              "startLaneIndex": 1,
              "endLaneIndex": 2,
              "points": [
                {
                  "x": -11.0,
                  "y": 694.0
                },
                {
                  "x": -9.592,
                  "y": 693.888
                },
                {
                  "x": -7.656,
                  "y": 693.584
                },
                {
                  "x": -5.324,
                  "y": 693.136
                },
                {
                  "x": -2.7279999999999998,
                  "y": 692.592
                },
                {
                  "x": 0.0,
                  "y": 692.0
                },
                {
                  "x": 2.7279999999999998,
                  "y": 691.408
                },
                {
                  "x": 5.323999999999999,
                  "y": 690.864
                },
                {
                  "x": 7.655999999999999,
                  "y": 690.4159999999999
                },
                {
                  "x": 9.592,
                  "y": 690.112
                },
                {
                  "x": 11.0,
                  "y": 690.0
                }
              ]
            }
          ]
        },
        {
          "type": "turn_left",
          "startRoad": "road_0_8_0",
          "endRoad": "road_1_8_1",
          "direction": 0,
          "laneLinks": [
            {
              "startLaneIndex": 0,
              "endLaneIndex": 0,
              "points": [
                {
                  "x": -11.0,
                  "y": 698.0
                },
                {
                  "x": -9.745,
                  "y": 698.265
                },
                {
                  "x": -8.24,
                  "y": 699.0
                },
                {
                  "x": -6.575,
                  "y": 700.115
                },
                {
                  "x": -4.84,
                  "y": 701.52
                },
                {
                  "x": -3.125,
                  "y": 703.125
                },
                {
                  "x": -1.52,
                  "y": 704.84
                },
                {
                  "x": -0.115000000000001,
                  "y": 706.575
                },
                {
                  "x": 0.999999999999999,
                  "y": 708.2399999999999
                },
                {
                  "x": 1.735,
                  "y": 709.745
                },
                {
                  "x": 2.0,
                  "y": 711.0
                }
              ]
            },
            {
              "startLaneIndex": 0,
              "endLaneIndex": 1,
              "points": [
                {
                  "x": -11.0,
                  "y": 698.0
                },
                {
                  "x": -9.633,
                  "y": 698.265
                },
                {
                  "x": -7.824,
                  "y": 699.0
                },
                {
                  "x": -5.711,
                  "y": 700.115
                },
                {
                  "x": -3.432,
                  "y": 701.52
                },
                {
                  "x": -1.125,
                  "y": 703.125
                },
                {
                  "x": 1.072,
                  "y": 704.84
                },
                {
                  "x": 3.020999999999999,
                  "y": 706.575
                },
                {
                  "x": 4.583999999999999,
                  "y": 708.2399999999999
                },
                {
                  "x": 5.623,
                  "y": 709.745
                },
                {
                  "x": 6.0,
                  "y": 711.0
                }
              ]
            },
            {
              "startLaneIndex": 0,
              "endLaneIndex": 2,
              "points": [
                {
                  "x": -11.0,
                  "y": 698.0
                },
                {
                  "x": -9.521,
                  "y": 698.265
                },
                {
                  "x": -7.408,
                  "y": 699.0
                },
                {
                  "x": -4.8469999999999995,
                  "y": 700.115
                },
                {
                  "x": -2.024,
                  "y": 701.52
                },
                {
                  "x": 0.875,
                  "y": 703.125
                },
                {
                  "x": 3.664,
                  "y": 704.84
                },
                {
                  "x": 6.156999999999999,
                  "y": 706.575
                },
                {
                  "x": 8.168,
                  "y": 708.2399999999999
                },
                {
                  "x": 9.511,
                  "y": 709.745
                },
                {
                  "x": 10.0,
                  "y": 711.0
                }
              ]
            }
          ]
        },
        {
          "type": "turn_right",
          "startRoad": "road_0_8_0",
          "endRoad": "road_1_8_3",
          "direction": 0,
          "laneLinks": [
            {
              "startLaneIndex": 2,
              "endLaneIndex": 0,
              "points": [
                {
                  "x": -11.0,
                  "y": 690.0
                },
                {
                  "x": -9.857,
                  "y": 690.071
                },
                {
                  "x": -8.656,
                  "y": 690.248
                },
                {
                  "x": -7.439,
                  "y": 690.477
                },
                {
                  "x": -6.248,
                  "y": 690.704
                },
                {
                  "x": -5.125,
                  "y": 690.875
                },
                {
                  "x": -4.112,
                  "y": 690.936
                },
                {
                  "x": -3.251000000000001,
                  "y": 690.833
                },
                {
                  "x": -2.584000000000001,
                  "y": 690.512
                },
                {
                  "x": -2.153,
                  "y": 689.919
                },
                {
                  "x": -2.0,
                  "y": 689.0
                }
              ]
            },
            {
              "startLaneIndex": 2,
              "endLaneIndex": 1,
              "points": [
                {
                  "x": -11.0,
                  "y": 690.0
                },
                {
                  "x": -9.969,
                  "y": 690.071
                },
                {
                  "x": -9.072,
                  "y": 690.248
                },
                {
                  "x": -8.303,
                  "y": 690.477
                },
                {
                  "x": -7.656,
                  "y": 690.704
                },
                {
                  "x": -7.125,
                  "y": 690.875
                },
                {
                  "x": -6.704,
                  "y": 690.936
                },
                {
                  "x": -6.387000000000001,
                  "y": 690.833
                },
                {
                  "x": -6.168000000000001,
                  "y": 690.512
                },
                {
                  "x": -6.0409999999999995,
                  "y": 689.919
                },
                {
                  "x": -6.0,
                  "y": 689.0
                }
              ]
            },
            {
              "startLaneIndex": 2,
              "endLaneIndex": 2,
              "points": [
                {
                  "x": -11.0,
                  "y": 690.0
                },
                {
                  "x": -10.081,
                  "y": 690.071
                },
                {
                  "x": -9.488,
                  "y": 690.248
                },
                {
                  "x": -9.167,
                  "y": 690.477
                },
                {
                  "x": -9.064,
                  "y": 690.704
                },
                {
                  "x": -9.125,
                  "y": 690.875
                },
                {
                  "x": -9.296,
                  "y": 690.936
                },
                {
                  "x": -9.523000000000001,
                  "y": 690.833
                },
                {
                  "x": -9.752,
                  "y": 690.512
                },
                {
                  "x": -9.929,
                  "y": 689.919
                },
                {
                  "x": -10.0,
                  "y": 689.0
                }
              ]
            }
          ]
        },
        {
          "type": "turn_right",
          "startRoad": "road_1_7_1",
          "endRoad": "road_1_8_0",
          "direction": 1,
          "laneLinks": [
            {
              "startLaneIndex": 2,
              "endLaneIndex": 0,
              "points": [
                {
                  "x": 10.0,
                  "y": 689.0
                },
                {
                  "x": 9.929,
                  "y": 690.143
                },
                {
                  "x": 9.752,
                  "y": 691.344
                },
                {
                  "x": 9.523,
                  "y": 692.561
                },
                {
                  "x": 9.296,
                  "y": 693.752
                },
                {
                  "x": 9.125,
                  "y": 694.875
                },
                {
                  "x": 9.064,
                  "y": 695.888
                },
                {
                  "x": 9.167,
                  "y": 696.749
                },
                {
                  "x": 9.488,
                  "y": 697.4159999999999
                },
                {
                  "x": 10.081,
                  "y": 697.847
                },
                {
                  "x": 11.0,
                  "y": 698.0
                }
              ]
            },
            {
              "startLaneIndex": 2,
              "endLaneIndex": 1,
              "points": [
                {
                  "x": 10.0,
                  "y": 689.0
                },
                {
                  "x": 9.929,
                  "y": 690.031
                },
                {
                  "x": 9.752,
                  "y": 690.928
                },
                {
                  "x": 9.523,
                  "y": 691.697
                },
                {
                  "x": 9.296,
                  "y": 692.344
                },
                {
                  "x": 9.125,
                  "y": 692.875
                },
                {
                  "x": 9.064,
                  "y": 693.296
                },
                {
                  "x": 9.167,
                  "y": 693.6129999999999
                },
                {
                  "x": 9.488,
                  "y": 693.8319999999999
                },
                {
                  "x": 10.081,
                  "y": 693.959
                },
                {
                  "x": 11.0,
                  "y": 694.0
                }
              ]
            },
            {
              "startLaneIndex": 2,
              "endLaneIndex": 2,
              "points": [
                {
                  "x": 10.0,
                  "y": 689.0
                },
                {
                  "x": 9.929,
                  "y": 689.919
                },
                {
                  "x": 9.752,
                  "y": 690.512
                },
                {
                  "x": 9.523,
                  "y": 690.833
                },
                {
                  "x": 9.296,
                  "y": 690.936
                },
                {
                  "x": 9.125,
                  "y": 690.875
                },
                {
                  "x": 9.064,
                  "y": 690.704
                },
                {
                  "x": 9.167,
                  "y": 690.477
                },
                {
                  "x": 9.488,
                  "y": 690.2479999999999
                },
                {
                  "x": 10.081,
                  "y": 690.071
                },
                {
                  "x": 11.0,
                  "y": 690.0
                }
              ]
            }
          ]
        },
        {
          "type": "go_straight",
          "startRoad": "road_1_7_1",
          "endRoad": "road_1_8_1",
          "direction": 1,
          "laneLinks": [
            {
              "startLaneIndex": 1,
              "endLaneIndex": 0,
              "points": [
                {
                  "x": 6.0,
                  "y": 689.0
                },
                {
                  "x": 5.888,
                  "y": 690.408
                },
                {
                  "x": 5.584,
                  "y": 692.344
                },
                {
                  "x": 5.136,
                  "y": 694.676
                },
                {
                  "x": 4.592,
                  "y": 697.272
                },
                {
                  "x": 4.0,
                  "y": 700.0
                },
                {
                  "x": 3.408,
                  "y": 702.728
                },
                {
                  "x": 2.864,
                  "y": 705.324
                },
                {
                  "x": 2.415999999999999,
                  "y": 707.656
                },
                {
                  "x": 2.112,
                  "y": 709.592
                },
                {
                  "x": 2.0,
                  "y": 711.0
                }
              ]
            },
            {
              "startLaneIndex": 1,
              "endLaneIndex": 1,
              "points": [
                {
                  "x": 6.0,
                  "y": 689.0
                },
                {
                  "x": 6.0,
                  "y": 690.408
                },
                {
                  "x": 6.0,
                  "y": 692.344
                },
                {
                  "x": 6.0,
                  "y": 694.676
                },
                {
                  "x": 6.0,
                  "y": 697.272
                },
                {
                  "x": 6.0,
                  "y": 700.0
                },
                {
                  "x": 6.0,
                  "y": 702.728
                },
                {
                  "x": 6.0,
                  "y": 705.324
                },
                {
                  "x": 5.999999999999999,
                  "y": 707.656
                },
                {
                  "x": 6.0,
                  "y": 709.592
                },
                {
                  "x": 6.0,
                  "y": 711.0
                }
              ]
            },
            {
              "startLaneIndex": 1,
              "endLaneIndex": 2,
              "points": [
                {
                  "x": 6.0,
                  "y": 689.0
                },
                {
                  "x": 6.112,
                  "y": 690.408
                },
                {
                  "x": 6.416,
                  "y": 692.344
                },
                {
                  "x": 6.864,
                  "y": 694.676
                },
                {
                  "x": 7.408,
                  "y": 697.272
                },
                {
                  "x": 8.0,
                  "y": 700.0
                },
                {
                  "x": 8.592,
                  "y": 702.728
                },
                {
                  "x": 9.136,
                  "y": 705.324
                },
                {
                  "x": 9.584,
                  "y": 707.656
                },
                {
                  "x": 9.888,
                  "y": 709.592
                },
                {
                  "x": 10.0,
                  "y": 711.0
                }
              ]
            }
          ]
        },
        {
          "type": "turn_left",
          "startRoad": "road_1_7_1",
          "endRoad": "road_1_8_2",
          "direction": 1,
          "laneLinks": [
            {
              "startLaneIndex": 0,
              "endLaneIndex": 0,
              "points": [
                {
                  "x": 2.0,
                  "y": 689.0
                },
                {
                  "x": 1.7349999999999999,
                  "y": 690.255
                },
                {
                  "x": 1.0,
                  "y": 691.76
                },
                {
                  "x": -0.115,
                  "y": 693.425
                },
                {
                  "x": -1.52,
                  "y": 695.16
                },
                {
                  "x": -3.125,
                  "y": 696.875
                },
                {
                  "x": -4.84,
                  "y": 698.48
                },
                {
                  "x": -6.575,
                  "y": 699.885
                },
                {
                  "x": -8.24,
                  "y": 700.9999999999999
                },
                {
                  "x": -9.745,
                  "y": 701.735
                },
                {
                  "x": -11.0,
                  "y": 702.0
                }
              ]
            },
            {
              "startLaneIndex": 0,
              "endLaneIndex": 1,
              "points": [
                {
                  "x": 2.0,
                  "y": 689.0
                },
                {
                  "x": 1.7349999999999999,
                  "y": 690.367
                },
                {
                  "x": 1.0,
                  "y": 692.176
                },
                {
                  "x": -0.115,
                  "y": 694.289
                },
                {
                  "x": -1.52,
                  "y": 696.568
                },
                {
                  "x": -3.125,
                  "y": 698.875
                },
                {
                  "x": -4.84,
                  "y": 701.072
                },
                {
                  "x": -6.575,
                  "y": 703.021
                },
                {
                  "x": -8.24,
                  "y": 704.584
                },
                {
                  "x": -9.745,
                  "y": 705.623
                },
                {
                  "x": -11.0,
                  "y": 706.0
                }
              ]
            },
            {
              "startLaneIndex": 0,
              "endLaneIndex": 2,
              "points": [
                {
                  "x": 2.0,
                  "y": 689.0
                },
                {
                  "x": 1.7349999999999999,
                  "y": 690.479
                },
                {
                  "x": 1.0,
                  "y": 692.592
                },
                {
                  "x": -0.115,
                  "y": 695.153
                },
                {
                  "x": -1.52,
                  "y": 697.976
                },
                {
                  "x": -3.125,
                  "y": 700.875
                },
                {
                  "x": -4.84,
                  "y": 703.664
                },
                {
                  "x": -6.575,
                  "y": 706.157
                },
                {
                  "x": -8.24,
                  "y": 708.1679999999999
                },
                {
                  "x": -9.745,
                  "y": 709.511
                },
                {
                  "x": -11.0,
                  "y": 710.0
                }
              ]
            }
          ]
        },
        {
          "type": "turn_right",
          "startRoad": "road_2_8_2",
          "endRoad": "road_1_8_1",
          "direction": 2,
          "laneLinks": [
            {
              "startLaneIndex": 2,
              "endLaneIndex": 0,
              "points": [
                {
                  "x": 11.0,
                  "y": 710.0
                },
                {
                  "x": 9.857,
                  "y": 709.929
                },
                {
                  "x": 8.656,
                  "y": 709.752
                },
                {
                  "x": 7.439,
                  "y": 709.523
                },
                {
                  "x": 6.248,
                  "y": 709.296
                },
                {
                  "x": 5.125,
                  "y": 709.125
                },
                {
                  "x": 4.112,
                  "y": 709.064
                },
                {
                  "x": 3.251000000000001,
                  "y": 709.167
                },
                {
                  "x": 2.584000000000001,
                  "y": 709.4879999999999
                },
                {
                  "x": 2.153,
                  "y": 710.081
                },
                {
                  "x": 2.0,
                  "y": 711.0
                }
              ]
            },
            {
              "startLaneIndex": 2,
              "endLaneIndex": 1,
              "points": [
                {
                  "x": 11.0,
                  "y": 710.0
                },
                {
                  "x": 9.969,
                  "y": 709.929
                },
                {
                  "x": 9.072,
                  "y": 709.752
                },
                {
                  "x": 8.303,
                  "y": 709.523
                },
                {
                  "x": 7.656,
                  "y": 709.296
                },
                {
                  "x": 7.125,
                  "y": 709.125
                },
                {
                  "x": 6.704,
                  "y": 709.064
                },
                {
                  "x": 6.387000000000001,
                  "y": 709.167
                },
                {
                  "x": 6.168000000000001,
                  "y": 709.4879999999999
                },
                {
                  "x": 6.0409999999999995,
                  "y": 710.081
                },
                {
                  "x": 6.0,
                  "y": 711.0
                }
              ]
            },
            {
              "startLaneIndex": 2,
              "endLaneIndex": 2,
              "points": [
                {
                  "x": 11.0,
                  "y": 710.0
                },
                {
                  "x": 10.081,
                  "y": 709.929
                },
                {
                  "x": 9.488,
                  "y": 709.752
                },
                {
                  "x": 9.167,
                  "y": 709.523
                },
                {
                  "x": 9.064,
                  "y": 709.296
                },
                {
                  "x": 9.125,
                  "y": 709.125
                },
                {
                  "x": 9.296,
                  "y": 709.064
                },
                {
                  "x": 9.523000000000001,
                  "y": 709.167
                },
                {
                  "x": 9.752,
                  "y": 709.4879999999999
                },
                {
                  "x": 9.929,
                  "y": 710.081
                },
                {
                  "x": 10.0,
                  "y": 711.0
                }
              ]
            }
          ]
        },
        {
          "type": "go_straight",
          "startRoad": "road_2_8_2",
          "endRoad": "road_1_8_2",
          "direction": 2,
          "laneLinks": [
            {
              "startLaneIndex": 1,
              "endLaneIndex": 0,
              "points": [
                {
                  "x": 11.0,
                  "y": 706.0
                },
                {
                  "x": 9.592,
                  "y": 705.888
                },
                {
                  "x": 7.656,
                  "y": 705.584
                },
                {
                  "x": 5.324,
                  "y": 705.136
                },
                {
                  "x": 2.7279999999999998,
                  "y": 704.592
                },
                {
                  "x": 0.0,
                  "y": 704.0
                },
                {
                  "x": -2.7279999999999998,
                  "y": 703.408
                },
                {
                  "x": -5.323999999999999,
                  "y": 702.864
                },
                {
                  "x": -7.655999999999999,
                  "y": 702.4159999999999
                },
                {
                  "x": -9.592,
                  "y": 702.112
                },
                {
                  "x": -11.0,
                  "y": 702.0
                }
              ]
            },
            {
              "startLaneIndex": 1,
              "endLaneIndex": 1,
              "points": [
                {
                  "x": 11.0,
                  "y": 706.0
                },
                {
                  "x": 9.592,
                  "y": 706.0
                },
                {
                  "x": 7.656,
                  "y": 706.0
                },
                {
                  "x": 5.324,
                  "y": 706.0
                },
                {
                  "x": 2.7279999999999998,
                  "y": 706.0
                },
                {
                  "x": 0.0,
                  "y": 706.0
                },
                {
                  "x": -2.7279999999999998,
                  "y": 706.0
                },
                {
                  "x": -5.323999999999999,
                  "y": 706.0
                },
                {
                  "x": -7.655999999999999,
                  "y": 705.9999999999999
                },
                {
                  "x": -9.592,
                  "y": 706.0
                },
                {
                  "x": -11.0,
                  "y": 706.0
                }
              ]
            },
            {
              "startLaneIndex": 1,
              "endLaneIndex": 2,
              "points": [
                {
                  "x": 11.0,
                  "y": 706.0
                },
                {
                  "x": 9.592,
                  "y": 706.112
                },
                {
                  "x": 7.656,
                  "y": 706.4159999999999
                },
                {
                  "x": 5.324,
                  "y": 706.864
                },
                {
                  "x": 2.7279999999999998,
                  "y": 707.408
                },
                {
                  "x": 0.0,
                  "y": 708.0
                },
                {
                  "x": -2.7279999999999998,
                  "y": 708.592
                },
                {
                  "x": -5.323999999999999,
                  "y": 709.136
                },
                {
                  "x": -7.655999999999999,
                  "y": 709.584
                },
                {
                  "x": -9.592,
                  "y": 709.888
                },
                {
                  "x": -11.0,
                  "y": 710.0
                }
              ]
            }
          ]
        },
        {
          "type": "turn_left",
          "startRoad": "road_2_8_2",
          "endRoad": "road_1_8_3",
          "direction": 2,
          "laneLinks": [
            {
              "startLaneIndex": 0,
              "endLaneIndex": 0,
              "points": [
                {
                  "x": 11.0,
                  "y": 702.0
                },
                {
                  "x": 9.745,
                  "y": 701.735
                },
                {
                  "x": 8.24,
                  "y": 701.0
                },
                {
                  "x": 6.575,
                  "y": 699.885
                },
                {
                  "x": 4.84,
                  "y": 698.48
                },
                {
                  "x": 3.125,
                  "y": 696.875
                },
                {
                  "x": 1.52,
                  "y": 695.16
                },
                {
                  "x": 0.115000000000001,
                  "y": 693.425
                },
                {
                  "x": -0.999999999999999,
                  "y": 691.7599999999999
                },
                {
                  "x": -1.735,
                  "y": 690.255
                },
                {
                  "x": -2.0,
                  "y": 689.0
                }
              ]
            },
            {
              "startLaneIndex": 0,
              "endLaneIndex": 1,
              "points": [
                {
                  "x": 11.0,
                  "y": 702.0
                },
                {
                  "x": 9.633,
                  "y": 701.735
                },
                {
                  "x": 7.824,
                  "y": 701.0
                },
                {
                  "x": 5.711,
                  "y": 699.885
                },
                {
                  "x": 3.432,
                  "y": 698.48
                },
                {
                  "x": 1.125,
                  "y": 696.875
                },
                {
                  "x": -1.072,
                  "y": 695.16
                },
                {
                  "x": -3.020999999999999,
                  "y": 693.425
                },
                {
                  "x": -4.583999999999999,
                  "y": 691.7599999999999
                },
                {
                  "x": -5.623,
                  "y": 690.255
                },
                {
                  "x": -6.0,
                  "y": 689.0
                }
              ]
            },
            {
              "startLaneIndex": 0,
              "endLaneIndex": 2,
              "points": [
                {
                  "x": 11.0,
                  "y": 702.0
                },
                {
                  "x": 9.521,
                  "y": 701.735
                },
                {
                  "x": 7.408,
                  "y": 701.0
                },
                {
                  "x": 4.8469999999999995,
                  "y": 699.885
                },
                {
                  "x": 2.024,
                  "y": 698.48
                },
                {
                  "x": -0.875,
                  "y": 696.875
                },
                {
                  "x": -3.664,
                  "y": 695.16
                },
                {
                  "x": -6.156999999999999,
                  "y": 693.425
                },
                {
                  "x": -8.168,
                  "y": 691.7599999999999
                },
                {
                  "x": -9.511,
                  "y": 690.255
                },
                {
                  "x": -10.0,
                  "y": 689.0
                }
              ]
            }
          ]
        },
        {
          "type": "turn_left",
          "startRoad": "road_1_9_3",
          "endRoad": "road_1_8_0",
          "direction": 3,
          "laneLinks": [
            {
              "startLaneIndex": 0,
              "endLaneIndex": 0,
              "points": [
                {
                  "x": -2.0,
                  "y": 711.0
                },
                {
                  "x": -1.7349999999999999,
                  "y": 709.745
                },
                {
                  "x": -1.0,
                  "y": 708.24
                },
                {
                  "x": 0.115,
                  "y": 706.575
                },
                {
                  "x": 1.52,
                  "y": 704.84
                },
                {
                  "x": 3.125,
                  "y": 703.125
                },
                {
                  "x": 4.84,
                  "y": 701.52
                },
                {
                  "x": 6.575,
                  "y": 700.115
                },
                {
                  "x": 8.24,
                  "y": 698.9999999999999
                },
                {
                  "x": 9.745,
                  "y": 698.265
                },
                {
                  "x": 11.0,
                  "y": 698.0
                }
              ]
[truncated: 2,127,691 more chars]
