# Supplementary material
Source: ML conference proceedings conference paper supplement (https://proceedings.neurips.cc/paper_files/paper/2021/hash/654516d1b4df6917094de807156adc14-Abstract.html)
Supplement: Supplementary file 1 [file 654516d1b4df6917094de807156adc14-Supplemental.zip › neurips-supplementary/codes/data/NewYork/28_7/anon_28_7_newyork_real_triple.json]

[
{"vehicle": {"length": 5.0, "width": 2.0, "maxPosAcc": 2.0, "maxNegAcc": 4.5, "usualPosAcc": 2.0, "usualNegAcc": 4.5, "minGap": 2.5, "maxSpeed": 11.111, "headwayTime": 2}, "route": ["road_8_2_2", "road_7_2_3", "road_7_1_3"], "interval": 1.0, "startTime": 0, "endTime": 0},
{"vehicle": {"length": 5.0, "width": 2.0, "maxPosAcc": 2.0, "maxNegAcc": 4.5, "usualPosAcc": 2.0, "usualNegAcc": 4.5, "minGap": 2.5, "maxSpeed": 11.111, "headwayTime": 2}, "route": ["road_8_6_2", "road_7_6_3", "road_7_5_2", "road_6_5_2", "road_5_5_2", "road_4_5_2", "road_3_5_3", "road_3_4_3", "road_3_3_3", "road_3_2_3", "road_3_1_2", "road_2_1_2", "road_1_1_3"], "interval": 1.0, "startTime": 0, "endTime": 0},
{"vehicle": {"length": 5.0, "width": 2.0, "maxPosAcc": 2.0, "maxNegAcc": 4.5, "usualPosAcc": 2.0, "usualNegAcc": 4.5, "minGap": 2.5, "maxSpeed": 11.111, "headwayTime": 2}, "route": ["road_8_9_2", "road_7_9_2", "road_6_9_2", "road_5_9_3", "road_5_8_3", "road_5_7_3", "road_5_6_3", "road_5_5_3", "road_5_4_3", "road_5_3_3", "road_5_2_3", "road_5_1_3"], "interval": 1.0, "startTime": 0, "endTime": 0},
{"vehicle": {"length": 5.0, "width": 2.0, "maxPosAcc": 2.0, "maxNegAcc": 4.5, "usualPosAcc": 2.0, "usualNegAcc": 4.5, "minGap": 2.5, "maxSpeed": 11.111, "headwayTime": 2}, "route": ["road_8_11_2", "road_7_11_2", "road_6_11_2", "road_5_11_3", "road_5_10_3", "road_5_9_3", "road_5_8_3", "road_5_7_3", "road_5_6_3", "road_5_5_3", "road_5_4_3", "road_5_3_3", "road_5_2_3", "road_5_1_3"], "interval": 1.0, "startTime": 0, "endTime": 0},
{"vehicle": {"length": 5.0, "width": 2.0, "maxPosAcc": 2.0, "maxNegAcc": 4.5, "usualPosAcc": 2.0, "usualNegAcc": 4.5, "minGap": 2.5, "maxSpeed": 11.111, "headwayTime": 2}, "route": ["road_8_12_2", "road_7_12_3", "road_7_11_2", "road_6_11_2", "road_5_11_2", "road_4_11_2", "road_3_11_3", "road_3_10_3", "road_3_9_3", "road_3_8_3", "road_3_7_3", "road_3_6_3", "road_3_5_3", "road_3_4_3", "road_3_3_3", "road_3_2_3", "road_3_1_2", "road_2_1_3"], "interval": 1.0, "startTime": 0, "endTime": 0},
{"vehicle": {"length": 5.0, "width": 2.0, "maxPosAcc": 2.0, "maxNegAcc": 4.5, "usualPosAcc": 2.0, "usualNegAcc": 4.5, "minGap": 2.5, "maxSpeed": 11.111, "headwayTime": 2}, "route": ["road_8_13_2", "road_7_13_2", "road_6_13_2", "road_5_13_3", "road_5_12_3", "road_5_11_3", "road_5_10_2", "road_4_10_2", "road_3_10_3", "road_3_9_3", "road_3_8_3", "road_3_7_3", "road_3_6_3", "road_3_5_3", "road_3_4_3", "road_3_3_3", "road_3_2_3", "road_3_1_2", "road_2_1_2", "road_1_1_3"], "interval": 1.0, "startTime": 0, "endTime": 0},
{"vehicle": {"length": 5.0, "width": 2.0, "maxPosAcc": 2.0, "maxNegAcc": 4.5, "usualPosAcc": 2.0, "usualNegAcc": 4.5, "minGap": 2.5, "maxSpeed": 11.111, "headwayTime": 2}, "route": ["road_8_14_2", "road_7_14_3", "road_7_13_2", "road_6_13_2", "road_5_13_3", "road_5_12_3", "road_5_11_3", "road_5_10_2", "road_4_10_2", "road_3_10_3", "road_3_9_3", "road_3_8_3", "road_3_7_3", "road_3_6_3", "road_3_5_3", "road_3_4_3", "road_3_3_3", "road_3_2_3", "road_3_1_3"], "interval": 1.0, "startTime": 0, "endTime": 0},
{"vehicle": {"length": 5.0, "width": 2.0, "maxPosAcc": 2.0, "maxNegAcc": 4.5, "usualPosAcc": 2.0, "usualNegAcc": 4.5, "minGap": 2.5, "maxSpeed": 11.111, "headwayTime": 2}, "route": ["road_8_18_2", "road_7_18_3", "road_7_17_3", "road_7_16_3", "road_7_15_3", "road_7_14_3", "road_7_13_3", "road_7_12_3", "road_7_11_3", "road_7_10_2", "road_6_10_2", "road_5_10_2", "road_4_10_2", "road_3_10_3", "road_3_9_3", "road_3_8_3", "road_3_7_2", "road_2_7_2", "road_1_7_1", "road_1_8_2"], "interval": 1.0, "startTime": 0, "endTime": 0},
{"vehicle": {"length": 5.0, "width": 2.0, "maxPosAcc": 2.0, "maxNegAcc": 4.5, "usualPosAcc": 2.0, "usualNegAcc": 4.5, "minGap": 2.5, "maxSpeed": 11.111, "headwayTime": 2}, "route": ["road_8_21_2", "road_7_21_2", "road_6_21_2", "road_5_21_2", "road_4_21_2", "road_3_21_2", "road_2_21_2", "road_1_21_1", "road_1_22_1", "road_1_23_1", "road_1_24_1", "road_1_25_1", "road_1_26_1", "road_1_27_1", "road_1_28_1"], "interval": 1.0, "startTime": 0, "endTime": 0},
{"vehicle": {"length": 5.0, "width": 2.0, "maxPosAcc": 2.0, "maxNegAcc": 4.5, "usualPosAcc": 2.0, "usualNegAcc": 4.5, "minGap": 2.5, "maxSpeed": 11.111, "headwayTime": 2}, "route": ["road_8_23_2", "road_7_23_2", "road_6_23_2", "road_5_23_2", "road_4_23_2", "road_3_23_2", "road_2_23_3", "road_2_22_3", "road_2_21_3", "road_2_20_3", "road_2_19_3", "road_2_18_3", "road_2_17_3", "road_2_16_3", "road_2_15_3", "road_2_14_3", "road_2_13_3", "road_2_12_3", "road_2_11_3", "road_2_10_3", "road_2_9_3", "road_2_8_3", "road_2_7_3", "road_2_6_3", "road_2_5_2", "road_1_5_2"], "interval": 1.0, "startTime": 0, "endTime": 0},
{"vehicle": {"length": 5.0, "width": 2.0, "maxPosAcc": 2.0, "maxNegAcc": 4.5, "usualPosAcc": 2.0, "usualNegAcc": 4.5, "minGap": 2.5, "maxSpeed": 11.111, "headwayTime": 2}, "route": ["road_8_24_2", "road_7_24_3", "road_7_23_2", "road_6_23_2", "road_5_23_2", "road_4_23_2", "road_3_23_2", "road_2_23_3", "road_2_22_3", "road_2_21_3", "road_2_20_3", "road_2_19_3", "road_2_18_3", "road_2_17_3", "road_2_16_3", "road_2_15_3", "road_2_14_3", "road_2_13_3", "road_2_12_3", "road_2_11_2", "road_1_11_2"], "interval": 1.0, "startTime": 0, "endTime": 0},
{"vehicle": {"length": 5.0, "width": 2.0, "maxPosAcc": 2.0, "maxNegAcc": 4.5, "usualPosAcc": 2.0, "usualNegAcc": 4.5, "minGap": 2.5, "maxSpeed": 11.111, "headwayTime": 2}, "route": ["road_8_27_2", "road_7_27_2", "road_6_27_2", "road_5_27_2", "road_4_27_2", "road_3_27_2", "road_2_27_2", "road_1_27_1", "road_1_28_0", "road_2_28_1"], "interval": 1.0, "startTime": 0, "endTime": 0},
{"vehicle": {"length": 5.0, "width": 2.0, "maxPosAcc": 2.0, "maxNegAcc": 4.5, "usualPosAcc": 2.0, "usualNegAcc": 4.5, "minGap": 2.5, "maxSpeed": 11.111, "headwayTime": 2}, "route": ["road_1_0_1", "road_1_1_1", "road_1_2_0", "road_2_2_0", "road_3_2_3", "road_3_1_3"], "interval": 1.0, "startTime": 0, "endTime": 0},
{"vehicle": {"length": 5.0, "width": 2.0, "maxPosAcc": 2.0, "maxNegAcc": 4.5, "usualPosAcc": 2.0, "usualNegAcc": 4.5, "minGap": 2.5, "maxSpeed": 11.111, "headwayTime": 2}, "route": ["road_2_0_1", "road_2_1_1", "road_2_2_0", "road_3_2_0", "road_4_2_0", "road_5_2_3", "road_5_1_2", "road_4_1_3"], "interval": 1.0, "startTime": 0, "endTime": 0},
{"vehicle": {"length": 5.0, "width": 2.0, "maxPosAcc": 2.0, "maxNegAcc": 4.5, "usualPosAcc": 2.0, "usualNegAcc": 4.5, "minGap": 2.5, "maxSpeed": 11.111, "headwayTime": 2}, "route": ["road_3_0_1", "road_3_1_2", "road_2_1_1", "road_2_2_1", "road_2_3_1", "road_2_4_1", "road_2_5_1", "road_2_6_1", "road_2_7_1", "road_2_8_1", "road_2_9_1", "road_2_10_1", "road_2_11_1", "road_2_12_1", "road_2_13_1", "road_2_14_1", "road_2_15_1", "road_2_16_1", "road_2_17_1", "road_2_18_1", "road_2_19_1", "road_2_20_1", "road_2_21_1", "road_2_22_1", "road_2_23_1", "road_2_24_1", "road_2_25_1", "road_2_26_1", "road_2_27_1", "road_2_28_0", "road_3_28_1"], "interval": 1.0, "startTime": 0, "endTime": 0},
{"vehicle": {"length": 5.0, "width": 2.0, "maxPosAcc": 2.0, "maxNegAcc": 4.5, "usualPosAcc": 2.0, "usualNegAcc": 4.5, "minGap": 2.5, "maxSpeed": 11.111, "headwayTime": 2}, "route": ["road_4_0_1", "road_4_1_2", "road_3_1_2", "road_2_1_2", "road_1_1_3"], "interval": 1.0, "startTime": 0, "endTime": 0},
{"vehicle": {"length": 5.0, "width": 2.0, "maxPosAcc": 2.0, "maxNegAcc": 4.5, "usualPosAcc": 2.0, "usualNegAcc": 4.5, "minGap": 2.5, "maxSpeed": 11.111, "headwayTime": 2}, "route": ["road_5_0_1", "road_5_1_2", "road_4_1_2", "road_3_1_2", "road_2_1_2", "road_1_1_1", "road_1_2_1", "road_1_3_1", "road_1_4_1", "road_1_5_1", "road_1_6_1", "road_1_7_1", "road_1_8_1", "road_1_9_1", "road_1_10_1", "road_1_11_1", "road_1_12_2"], "interval": 1.0, "startTime": 0, "endTime": 0},
{"vehicle": {"length": 5.0, "width": 2.0, "maxPosAcc": 2.0, "maxNegAcc": 4.5, "usualPosAcc": 2.0, "usualNegAcc": 4.5, "minGap": 2.5, "maxSpeed": 11.111, "headwayTime": 2}, "route": ["road_6_0_1", "road_6_1_2", "road_5_1_2", "road_4_1_2", "road_3_1_3"], "interval": 1.0, "startTime": 0, "endTime": 0},
{"vehicle": {"length": 5.0, "width": 2.0, "maxPosAcc": 2.0, "maxNegAcc": 4.5, "usualPosAcc": 2.0, "usualNegAcc": 4.5, "minGap": 2.5, "maxSpeed": 11.111, "headwayTime": 2}, "route": ["road_0_22_0", "road_1_22_0", "road_2_22_0", "road_3_22_0", "road_4_22_0", "road_5_22_3", "road_5_21_3", "road_5_20_3", "road_5_19_3", "road_5_18_3", "road_5_17_0", "road_6_17_0", "road_7_17_3", "road_7_16_3", "road_7_15_3", "road_7_14_3", "road_7_13_3", "road_7_12_3", "road_7_11_3", "road_7_10_0"], "interval": 1.0, "startTime": 0, "endTime": 0},
{"vehicle": {"length": 5.0, "width": 2.0, "maxPosAcc": 2.0, "maxNegAcc": 4.5, "usualPosAcc": 2.0, "usualNegAcc": 4.5, "minGap": 2.5, "maxSpeed": 11.111, "headwayTime": 2}, "route": ["road_0_10_0", "road_1_10_0", "road_2_10_1", "road_2_11_1", "road_2_12_1", "road_2_13_1", "road_2_14_1", "road_2_15_1", "road_2_16_1", "road_2_17_1", "road_2_18_1", "road_2_19_1", "road_2_20_1", "road_2_21_1", "road_2_22_1", "road_2_23_1", "road_2_24_1", "road_2_25_1", "road_2_26_1", "road_2_27_1", "road_2_28_1"], "interval": 1.0, "startTime": 0, "endTime": 0},
{"vehicle": {"length": 5.0, "width": 2.0, "maxPosAcc": 2.0, "maxNegAcc": 4.5, "usualPosAcc": 2.0, "usualNegAcc": 4.5, "minGap": 2.5, "maxSpeed": 11.111, "headwayTime": 2}, "route": ["road_0_16_0", "road_1_16_0", "road_2_16_0", "road_3_16_0", "road_4_16_0", "road_5_16_0", "road_6_16_0", "road_7_16_3", "road_7_15_3", "road_7_14_3", "road_7_13_3", "road_7_12_3", "road_7_11_0"], "interval": 1.0, "startTime": 0, "endTime": 0},
{"vehicle": {"length": 5.0, "width": 2.0, "maxPosAcc": 2.0, "maxNegAcc": 4.5, "usualPosAcc": 2.0, "usualNegAcc": 4.5, "minGap": 2.5, "maxSpeed": 11.111, "headwayTime": 2}, "route": ["road_0_5_0", "road_1_5_1", "road_1_6_0", "road_2_6_0", "road_3_6_0", "road_4_6_0", "road_5_6_0", "road_6_6_0", "road_7_6_1", "road_7_7_1", "road_7_8_1", "road_7_9_1", "road_7_10_1", "road_7_11_1", "road_7_12_1", "road_7_13_1", "road_7_14_1", "road_7_15_1", "road_7_16_1", "road_7_17_1", "road_7_18_1", "road_7_19_1", "road_7_20_1", "road_7_21_1", "road_7_22_1", "road_7_23_1", "road_7_24_1", "road_7_25_1", "road_7_26_1", "road_7_27_1", "road_7_28_1"], "interval": 1.0, "startTime": 0, "endTime": 0},
{"vehicle": {"length": 5.0, "width": 2.0, "maxPosAcc": 2.0, "maxNegAcc": 4.5, "usualPosAcc": 2.0, "usualNegAcc": 4.5, "minGap": 2.5, "maxSpeed": 11.111, "headwayTime": 2}, "route": ["road_0_18_0", "road_1_18_1", "road_1_19_1", "road_1_20_1", "road_1_21_1", "road_1_22_1", "road_1_23_1", "road_1_24_1", "road_1_25_2"], "interval": 1.0, "startTime": 0, "endTime": 0},
{"vehicle": {"length": 5.0, "width": 2.0, "maxPosAcc": 2.0, "maxNegAcc": 4.5, "usualPosAcc": 2.0, "usualNegAcc": 4.5, "minGap": 2.5, "maxSpeed": 11.111, "headwayTime": 2}, "route": ["road_0_11_0", "road_1_11_1", "road_1_12_0", "road_2_12_3", "road_2_11_3", "road_2_10_3", "road_2_9_3", "road_2_8_3", "road_2_7_3", "road_2_6_3", "road_2_5_3", "road_2_4_3", "road_2_3_3", "road_2_2_3", "road_2_1_2", "road_1_1_3"], "interval": 1.0, "startTime": 0, "endTime": 0},
{"vehicle": {"length": 5.0, "width": 2.0, "maxPosAcc": 2.0, "maxNegAcc": 4.5, "usualPosAcc": 2.0, "usualNegAcc": 4.5, "minGap": 2.5, "maxSpeed": 11.111, "headwayTime": 2}, "route": ["road_0_12_0", "road_1_12_1", "road_1_13_1", "road_1_14_1", "road_1_15_1", "road_1_16_1", "road_1_17_1", "road_1_18_1", "road_1_19_1", "road_1_20_1", "road_1_21_1", "road_1_22_1", "road_1_23_1", "road_1_24_1", "road_1_25_1", "road_1_26_1", "road_1_27_1", "road_1_28_0", "road_2_28_1"], "interval": 1.0, "startTime": 0, "endTime": 0},
{"vehicle": {"length": 5.0, "width": 2.0, "maxPosAcc": 2.0, "maxNegAcc": 4.5, "usualPosAcc": 2.0, "usualNegAcc": 4.5, "minGap": 2.5, "maxSpeed": 11.111, "headwayTime": 2}, "route": ["road_5_29_3", "road_5_28_3", "road_5_27_3", "road_5_26_3", "road_5_25_3", "road_5_24_3", "road_5_23_3", "road_5_22_3", "road_5_21_3", "road_5_20_3", "road_5_19_3", "road_5_18_3", "road_5_17_0", "road_6_17_0", "road_7_17_3", "road_7_16_3", "road_7_15_3", "road_7_14_3", "road_7_13_3", "road_7_12_3", "road_7_11_3", "road_7_10_3", "road_7_9_0"], "interval": 1.0, "startTime": 0, "endTime": 0},
{"vehicle": {"length": 5.0, "width": 2.0, "maxPosAcc": 2.0, "maxNegAcc": 4.5, "usualPosAcc": 2.0, "usualNegAcc": 4.5, "minGap": 2.5, "maxSpeed": 11.111, "headwayTime": 2}, "route": ["road_1_29_3", "road_1_28_0", "road_2_28_0", "road_3_28_0", "road_4_28_0", "road_5_28_0", "road_6_28_1"], "interval": 1.0, "startTime": 0, "endTime": 0},
{"vehicle": {"length": 5.0, "width": 2.0, "maxPosAcc": 2.0, "maxNegAcc": 4.5, "usualPosAcc": 2.0, "usualNegAcc": 4.5, "minGap": 2.5, "maxSpeed": 11.111, "headwayTime": 2}, "route": ["road_2_29_3", "road_2_28_0", "road_3_28_3", "road_3_27_2", "road_2_27_3", "road_2_26_3", "road_2_25_3", "road_2_24_3", "road_2_23_3", "road_2_22_3", "road_2_21_3", "road_2_20_3", "road_2_19_3", "road_2_18_3", "road_2_17_3", "road_2_16_3", "road_2_15_3", "road_2_14_3", "road_2_13_3", "road_2_12_3", "road_2_11_3", "road_2_10_3", "road_2_9_3", "road_2_8_3", "road_2_7_3", "road_2_6_3", "road_2_5_3", "road_2_4_3", "road_2_3_3", "road_2_2_3", "road_2_1_2", "road_1_1_3"], "interval": 1.0, "startTime": 0, "endTime": 0},
{"vehicle": {"length": 5.0, "width": 2.0, "maxPosAcc": 2.0, "maxNegAcc": 4.5, "usualPosAcc": 2.0, "usualNegAcc": 4.5, "minGap": 2.5, "maxSpeed": 11.111, "headwayTime": 2}, "route": ["road_3_29_3", "road_3_28_3", "road_3_27_2", "road_2_27_3", "road_2_26_3", "road_2_25_3", "road_2_24_3", "road_2_23_3", "road_2_22_3", "road_2_21_3", "road_2_20_3", "road_2_19_3", "road_2_18_3", "road_2_17_2", "road_1_17_2"], "interval": 1.0, "startTime": 0, "endTime": 0},
{"vehicle": {"length": 5.0, "width": 2.0, "maxPosAcc": 2.0, "maxNegAcc": 4.5, "usualPosAcc": 2.0, "usualNegAcc": 4.5, "minGap": 2.5, "maxSpeed": 11.111, "headwayTime": 2}, "route": ["road_6_29_3", "road_6_28_0", "road_7_28_3", "road_7_27_2", "road_6_27_2", "road_5_27_3", "road_5_26_3", "road_5_25_2", "road_4_25_2", "road_3_25_2", "road_2_25_3", "road_2_24_3", "road_2_23_3", "road_2_22_3", "road_2_21_3", "road_2_20_3", "road_2_19_3", "road_2_18_3", "road_2_17_2", "road_1_17_1", "road_1_18_2"], "interval": 1.0, "startTime": 0, "endTime": 0},
{"vehicle": {"length": 5.0, "width": 2.0, "maxPosAcc": 2.0, "maxNegAcc": 4.5, "usualPosAcc": 2.0, "usualNegAcc": 4.5, "minGap": 2.5, "maxSpeed": 11.111, "headwayTime": 2}, "route": ["road_0_26_0", "road_1_26_0", "road_2_26_0", "road_3_26_0", "road_4_26_0", "road_5_26_3", "road_5_25_3", "road_5_24_3", "road_5_23_3", "road_5_22_3", "road_5_21_3", "road_5_20_0", "road_6_20_0", "road_7_20_3", "road_7_19_3", "road_7_18_3", "road_7_17_3", "road_7_16_0"], "interval": 1.0, "startTime": 0, "endTime": 0},
{"vehicle": {"length": 5.0, "width": 2.0, "maxPosAcc": 2.0, "maxNegAcc": 4.5, "usualPosAcc": 2.0, "usualNegAcc": 4.5, "minGap": 2.5, "maxSpeed": 11.111, "headwayTime": 2}, "route": ["road_0_17_0", "road_1_17_0", "road_2_17_3", "road_2_16_3", "road_2_15_3", "road_2_14_3", "road_2_13_3", "road_2_12_3", "road_2_11_3", "road_2_10_3", "road_2_9_3", "road_2_8_3", "road_2_7_3", "road_2_6_3", "road_2_5_3", "road_2_4_3", "road_2_3_3", "road_2_2_3", "road_2_1_2", "road_1_1_3"], "interval": 1.0, "startTime": 0, "endTime": 0},
{"vehicle": {"length": 5.0, "width": 2.0, "maxPosAcc": 2.0, "maxNegAcc": 4.5, "usualPosAcc": 2.0, "usualNegAcc": 4.5, "minGap": 2.5, "maxSpeed": 11.111, "headwayTime": 2}, "route": ["road_0_19_0", "road_1_19_1", "road_1_20_0", "road_2_20_0", "road_3_20_0", "road_4_20_0", "road_5_20_0", "road_6_20_0", "road_7_20_1", "road_7_21_1", "road_7_22_1", "road_7_23_1", "road_7_24_1", "road_7_25_1", "road_7_26_1", "road_7_27_0"], "interval": 1.0, "startTime": 0, "endTime": 0},
{"vehicle": {"length": 5.0, "width": 2.0, "maxPosAcc": 2.0, "maxNegAcc": 4.5, "usualPosAcc": 2.0, "usualNegAcc": 4.5, "minGap": 2.5, "maxSpeed": 11.111, "headwayTime": 2}, "route": ["road_0_21_0", "road_1_21_1", "road_1_22_0", "road_2_22_3", "road_2_21_3", "road_2_20_3", "road_2_19_3", "road_2_18_3", "road_2_17_3", "road_2_16_3", "road_2_15_3", "road_2_14_3", "road_2_13_3", "road_2_12_3", "road_2_11_3", "road_2_10_3", "road_2_9_3", "road_2_8_3", "road_2_7_3", "road_2_6_3", "road_2_5_3", "road_2_4_3", "road_2_3_3", "road_2_2_0", "road_3_2_0", "road_4_2_0", "road_5_2_3", "road_5_1_3"], "interval": 1.0, "startTime": 0, "endTime": 0},
{"vehicle": {"length": 5.0, "width": 2.0, "maxPosAcc": 2.0, "maxNegAcc": 4.5, "usualPosAcc": 2.0, "usualNegAcc": 4.5, "minGap": 2.5, "maxSpeed": 11.111, "headwayTime": 2}, "route": ["road_0_23_0", "road_1_23_1", "road_1_24_0", "road_2_24_0", "road_3_24_0", "road_4_24_0", "road_5_24_0", "road_6_24_0", "road_7_24_3", "road_7_23_3", "road_7_22_3", "road_7_21_3", "road_7_20_3", "road_7_19_0"], "interval": 1.0, "startTime": 0, "endTime": 0},
{"vehicle": {"length": 5.0, "width": 2.0, "maxPosAcc": 2.0, "maxNegAcc": 4.5, "usualPosAcc": 2.0, "usualNegAcc": 4.5, "minGap": 2.5, "maxSpeed": 11.111, "headwayTime": 2}, "route": ["road_2_0_1", "road_2_1_2", "road_1_1_1", "road_1_2_1", "road_1_3_1", "road_1_4_1", "road_1_5_2"], "interval": 1.0, "startTime": 0, "endTime": 0},
{"vehicle": {"length": 5.0, "width": 2.0, "maxPosAcc": 2.0, "maxNegAcc": 4.5, "usualPosAcc": 2.0, "usualNegAcc": 4.5, "minGap": 2.5, "maxSpeed": 11.111, "headwayTime": 2}, "route": ["road_2_29_3", "road_2_28_3", "road_2_27_3", "road_2_26_3", "road_2_25_3", "road_2_24_3", "road_2_23_3", "road_2_22_3", "road_2_21_3", "road_2_20_3", "road_2_19_3", "road_2_18_3", "road_2_17_3", "road_2_16_3", "road_2_15_3", "road_2_14_3", "road_2_13_3", "road_2_12_3", "road_2_11_3", "road_2_10_3", "road_2_9_3", "road_2_8_3", "road_2_7_3", "road_2_6_3", "road_2_5_3", "road_2_4_3", "road_2_3_3", "road_2_2_3", "road_2_1_2", "road_1_1_3"], "interval": 1.0, "startTime": 0, "endTime": 0},
{"vehicle": {"length": 5.0, "width": 2.0, "maxPosAcc": 2.0, "maxNegAcc": 4.5, "usualPosAcc": 2.0, "usualNegAcc": 4.5, "minGap": 2.5, "maxSpeed": 11.111, "headwayTime": 2}, "route": ["road_2_0_1", "road_2_1_2", "road_1_1_3"], "interval": 1.0, "startTime": 1, "endTime": 1},
{"vehicle": {"length": 5.0, "width": 2.0, "maxPosAcc": 2.0, "maxNegAcc": 4.5, "usualPosAcc": 2.0, "usualNegAcc": 4.5, "minGap": 2.5, "maxSpeed": 11.111, "headwayTime": 2}, "route": ["road_3_0_1", "road_3_1_2", "road_2_1_3"], "interval": 1.0, "startTime": 1, "endTime": 1},
{"vehicle": {"length": 5.0, "width": 2.0, "maxPosAcc": 2.0, "maxNegAcc": 4.5, "usualPosAcc": 2.0, "usualNegAcc": 4.5, "minGap": 2.5, "maxSpeed": 11.111, "headwayTime": 2}, "route": ["road_4_0_1", "road_4_1_2", "road_3_1_2", "road_2_1_2", "road_1_1_1", "road_1_2_1", "road_1_3_1", "road_1_4_1", "road_1_5_1", "road_1_6_1", "road_1_7_1", "road_1_8_1", "road_1_9_1", "road_1_10_1", "road_1_11_1", "road_1_12_1", "road_1_13_1", "road_1_14_1", "road_1_15_1", "road_1_16_1", "road_1_17_1", "road_1_18_1", "road_1_19_1", "road_1_20_1", "road_1_21_1", "road_1_22_1", "road_1_23_1", "road_1_24_1", "road_1_25_1", "road_1_26_1", "road_1_27_1", "road_1_28_1"], "interval": 1.0, "startTime": 1, "endTime": 1},
{"vehicle": {"length": 5.0, "width": 2.0, "maxPosAcc": 2.0, "maxNegAcc": 4.5, "usualPosAcc": 2.0, "usualNegAcc": 4.5, "minGap": 2.5, "maxSpeed": 11.111, "headwayTime": 2}, "route": ["road_4_29_3", "road_4_28_0", "road_5_28_3", "road_5_27_3", "road_5_26_3", "road_5_25_3", "road_5_24_3", "road_5_23_3", "road_5_22_3", "road_5_21_3", "road_5_20_3", "road_5_19_3", "road_5_18_3", "road_5_17_0", "road_6_17_0", "road_7_17_3", "road_7_16_3", "road_7_15_3", "road_7_14_3", "road_7_13_3", "road_7_12_3", "road_7_11_0"], "interval": 1.0, "startTime": 2, "endTime": 2},
{"vehicle": {"length": 5.0, "width": 2.0, "maxPosAcc": 2.0, "maxNegAcc": 4.5, "usualPosAcc": 2.0, "usualNegAcc": 4.5, "minGap": 2.5, "maxSpeed": 11.111, "headwayTime": 2}, "route": ["road_1_0_1", "road_1_1_1", "road_1_2_0", "road_2_2_0", "road_3_2_3", "road_3_1_2", "road_2_1_3"], "interval": 1.0, "startTime": 3, "endTime": 3},
{"vehicle": {"length": 5.0, "width": 2.0, "maxPosAcc": 2.0, "maxNegAcc": 4.5, "usualPosAcc": 2.0, "usualNegAcc": 4.5, "minGap": 2.5, "maxSpeed": 11.111, "headwayTime": 2}, "route": ["road_0_9_0", "road_1_9_1", "road_1_10_1", "road_1_11_1", "road_1_12_1", "road_1_13_1", "road_1_14_1", "road_1_15_1", "road_1_16_1", "road_1_17_1", "road_1_18_1", "road_1_19_1", "road_1_20_1", "road_1_21_1", "road_1_22_2"], "interval": 1.0, "startTime": 5, "endTime": 5},
{"vehicle": {"length": 5.0, "width": 2.0, "maxPosAcc": 2.0, "maxNegAcc": 4.5, "usualPosAcc": 2.0, "usualNegAcc": 4.5, "minGap": 2.5, "maxSpeed": 11.111, "headwayTime": 2}, "route": ["road_4_29_3", "road_4_28_0", "road_5_28_3", "road_5_27_3", "road_5_26_3", "road_5_25_3", "road_5_24_3", "road_5_23_3", "road_5_22_3", "road_5_21_3", "road_5_20_3", "road_5_19_3", "road_5_18_3", "road_5_17_3", "road_5_16_3", "road_5_15_3", "road_5_14_3", "road_5_13_3", "road_5_12_3", "road_5_11_3", "road_5_10_3", "road_5_9_3", "road_5_8_3", "road_5_7_3", "road_5_6_3", "road_5_5_3", "road_5_4_3", "road_5_3_3", "road_5_2_3", "road_5_1_3"], "interval": 1.0, "startTime": 6, "endTime": 6},
{"vehicle": {"length": 5.0, "width": 2.0, "maxPosAcc": 2.0, "maxNegAcc": 4.5, "usualPosAcc": 2.0, "usualNegAcc": 4.5, "minGap": 2.5, "maxSpeed": 11.111, "headwayTime": 2}, "route": ["road_0_22_0", "road_1_22_0", "road_2_22_3", "road_2_21_3", "road_2_20_3", "road_2_19_3", "road_2_18_3", "road_2_17_3", "road_2_16_3", "road_2_15_3", "road_2_14_3", "road_2_13_3", "road_2_12_3", "road_2_11_3", "road_2_10_3", "road_2_9_3", "road_2_8_3", "road_2_7_3", "road_2_6_3", "road_2_5_3", "road_2_4_2", "road_1_4_2"], "interval": 1.0, "startTime": 7, "endTime": 7},
{"vehicle": {"length": 5.0, "width": 2.0, "maxPosAcc": 2.0, "maxNegAcc": 4.5, "usualPosAcc": 2.0, "usualNegAcc": 4.5, "minGap": 2.5, "maxSpeed": 11.111, "headwayTime": 2}, "route": ["road_1_0_1", "road_1_1_1", "road_1_2_1", "road_1_3_1", "road_1_4_1", "road_1_5_1", "road_1_6_1", "road_1_7_1", "road_1_8_1", "road_1_9_1", "road_1_10_1", "road_1_11_1", "road_1_12_1", "road_1_13_1", "road_1_14_2"], "interval": 1.0, "startTime": 10, "endTime": 10},
{"vehicle": {"length": 5.0, "width": 2.0, "maxPosAcc": 2.0, "maxNegAcc": 4.5, "usualPosAcc": 2.0, "usualNegAcc": 4.5, "minGap": 2.5, "maxSpeed": 11.111, "headwayTime": 2}, "route": ["road_0_5_0", "road_1_5_1", "road_1_6_0", "road_2_6_3", "road_2_5_3", "road_2_4_3", "road_2_3_3", "road_2_2_3", "road_2_1_2", "road_1_1_3"], "interval": 1.0, "startTime": 10, "endTime": 10},
{"vehicle": {"length": 5.0, "width": 2.0, "maxPosAcc": 2.0, "maxNegAcc": 4.5, "usualPosAcc": 2.0, "usualNegAcc": 4.5, "minGap": 2.5, "maxSpeed": 11.111, "headwayTime": 2}, "route": ["road_0_21_0", "road_1_21_1", "road_1_22_1", "road_1_23_1", "road_1_24_1", "road_1_25_1", "road_1_26_1", "road_1_27_1", "road_1_28_1"], "interval": 1.0, "startTime": 11, "endTime": 11},
{"vehicle": {"length": 5.0, "width": 2.0, "maxPosAcc": 2.0, "maxNegAcc": 4.5, "usualPosAcc": 2.0, "usualNegAcc": 4.5, "minGap": 2.5, "maxSpeed": 11.111, "headwayTime": 2}, "route": ["road_4_0_1", "road_4_1_1", "road_4_2_0", "road_5_2_0", "road_6_2_0", "road_7_2_1", "road_7_3_1", "road_7_4_1", "road_7_5_1", "road_7_6_1", "road_7_7_1", "road_7_8_1", "road_7_9_1", "road_7_10_1", "road_7_11_1", "road_7_12_1", "road_7_13_1", "road_7_14_1", "road_7_15_1", "road_7_16_1", "road_7_17_1", "road_7_18_1", "road_7_19_1", "road_7_20_1", "road_7_21_1", "road_7_22_1", "road_7_23_1", "road_7_24_0"], "interval": 1.0, "startTime": 12, "endTime": 12},
{"vehicle": {"length": 5.0, "width": 2.0, "maxPosAcc": 2.0, "maxNegAcc": 4.5, "usualPosAcc": 2.0, "usualNegAcc": 4.5, "minGap": 2.5, "maxSpeed": 11.111, "headwayTime": 2}, "route": ["road_1_0_1", "road_1_1_1", "road_1_2_1", "road_1_3_1", "road_1_4_1", "road_1_5_1", "road_1_6_1", "road_1_7_1", "road_1_8_1", "road_1_9_1", "road_1_10_2"], "interval": 1.0, "startTime": 13, "endTime": 13},
{"vehicle": {"length": 5.0, "width": 2.0, "maxPosAcc": 2.0, "maxNegAcc": 4.5, "usualPosAcc": 2.0, "usualNegAcc": 4.5, "minGap": 2.5, "maxSpeed": 11.111, "headwayTime": 2}, "route": ["road_1_0_1", "road_1_1_1", "road_1_2_1", "road_1_3_1", "road_1_4_1", "road_1_5_1", "road_1_6_1", "road_1_7_1", "road_1_8_1", "road_1_9_1", "road_1_10_1", "road_1_11_1", "road_1_12_1", "road_1_13_1", "road_1_14_1", "road_1_15_1", "road_1_16_1", "road_1_17_1", "road_1_18_1", "road_1_19_1", "road_1_20_1", "road_1_21_1", "road_1_22_1", "road_1_23_1", "road_1_24_1", "road_1_25_1", "road_1_26_1", "road_1_27_1", "road_1_28_0", "road_2_28_1"], "interval": 1.0, "startTime": 15, "endTime": 15},
{"vehicle": {"length": 5.0, "width": 2.0, "maxPosAcc": 2.0, "maxNegAcc": 4.5, "usualPosAcc": 2.0, "usualNegAcc": 4.5, "minGap": 2.5, "maxSpeed": 11.111, "headwayTime": 2}, "route": ["road_8_24_2", "road_7_24_3", "road_7_23_3", "road_7_22_3", "road_7_21_3", "road_7_20_0"], "interval": 1.0, "startTime": 17, "endTime": 17},
{"vehicle": {"length": 5.0, "width": 2.0, "maxPosAcc": 2.0, "maxNegAcc": 4.5, "usualPosAcc": 2.0, "usualNegAcc": 4.5, "minGap": 2.5, "maxSpeed": 11.111, "headwayTime": 2}, "route": ["road_0_18_0", "road_1_18_0", "road_2_18_3", "road_2_17_3", "road_2_16_3", "road_2_15_3", "road_2_14_3", "road_2_13_3", "road_2_12_3", "road_2_11_2", "road_1_11_2"], "interval": 1.0, "startTime": 17, "endTime": 17},
{"vehicle": {"length": 5.0, "width": 2.0, "maxPosAcc": 2.0, "maxNegAcc": 4.5, "usualPosAcc": 2.0, "usualNegAcc": 4.5, "minGap": 2.5, "maxSpeed": 11.111, "headwayTime": 2}, "route": ["road_2_29_3", "road_2_28_0", "road_3_28_3", "road_3_27_2", "road_2_27_3", "road_2_26_3", "road_2_25_3", "road_2_24_3", "road_2_23_3", "road_2_22_3", "road_2_21_3", "road_2_20_3", "road_2_19_3", "road_2_18_3", "road_2_17_3", "road_2_16_3", "road_2_15_3", "road_2_14_3", "road_2_13_3", "road_2_12_3", "road_2_11_3", "road_2_10_2", "road_1_10_2"], "interval": 1.0, "startTime": 18, "endTime": 18},
{"vehicle": {"length": 5.0, "width": 2.0, "maxPosAcc": 2.0, "maxNegAcc": 4.5, "usualPosAcc": 2.0, "usualNegAcc": 4.5, "minGap": 2.5, "maxSpeed": 11.111, "headwayTime": 2}, "route": ["road_0_12_0", "road_1_12_0", "road_2_12_1", "road_2_13_1", "road_2_14_1", "road_2_15_1", "road_2_16_1", "road_2_17_1", "road_2_18_1", "road_2_19_1", "road_2_20_1", "road_2_21_1", "road_2_22_1", "road_2_23_1", "road_2_24_1", "road_2_25_1", "road_2_26_0", "road_3_26_0", "road_4_26_1", "road_4_27_1", "road_4_28_0", "road_5_28_1"], "interval": 1.0, "startTime": 22, "endTime": 22},
{"vehicle": {"length": 5.0, "width": 2.0, "maxPosAcc": 2.0, "maxNegAcc": 4.5, "usualPosAcc": 2.0, "usualNegAcc": 4.5, "minGap": 2.5, "maxSpeed": 11.111, "headwayTime": 2}, "route": ["road_1_29_3", "road_1_28_0", "road_2_28_3", "road_2_27_3", "road_2_26_3", "road_2_25_3", "road_2_24_3", "road_2_23_3", "road_2_22_3", "road_2_21_3", "road_2_20_3", "road_2_19_3", "road_2_18_3", "road_2_17_3", "road_2_16_3", "road_2_15_3", "road_2_14_3", "road_2_13_3", "road_2_12_3", "road_2_11_3", "road_2_10_3", "road_2_9_3", "road_2_8_3", "road_2_7_2", "road_1_7_2"], "interval": 1.0, "startTime": 22, "endTime": 22},
{"vehicle": {"length": 5.0, "width": 2.0, "maxPosAcc": 2.0, "maxNegAcc": 4.5, "usualPosAcc": 2.0, "usualNegAcc": 4.5, "minGap": 2.5, "maxSpeed": 11.111, "headwayTime": 2}, "route": ["road_1_29_3", "road_1_28_0", "road_2_28_0", "road_3_28_0", "road_4_28_1"], "interval": 1.0, "startTime": 25, "endTime": 25},
{"vehicle": {"length": 5.0, "width": 2.0, "maxPosAcc": 2.0, "maxNegAcc": 4.5, "usualPosAcc": 2.0, "usualNegAcc": 4.5, "minGap": 2.5, "maxSpeed": 11.111, "headwayTime": 2}, "route": ["road_0_25_0", "road_1_25_1", "road_1_26_1", "road_1_27_1", "road_1_28_0", "road_2_28_1"], "interval": 1.0, "startTime": 25, "endTime": 25},
{"vehicle": {"length": 5.0, "width": 2.0, "maxPosAcc": 2.0, "maxNegAcc": 4.5, "usualPosAcc": 2.0, "usualNegAcc": 4.5, "minGap": 2.5, "maxSpeed": 11.111, "headwayTime": 2}, "route": ["road_0_12_0", "road_1_12_0", "road_2_12_0", "road_3_12_0", "road_4_12_0", "road_5_12_0", "road_6_12_0", "road_7_12_3", "road_7_11_3", "road_7_10_3", "road_7_9_0"], "interval": 1.0, "startTime": 27, "endTime": 27},
{"vehicle": {"length": 5.0, "width": 2.0, "maxPosAcc": 2.0, "maxNegAcc": 4.5, "usualPosAcc": 2.0, "usualNegAcc": 4.5, "minGap": 2.5, "maxSpeed": 11.111, "headwayTime": 2}, "route": ["road_8_19_2", "road_7_19_2", "road_6_19_2", "road_5_19_2", "road_4_19_2", "road_3_19_2", "road_2_19_2", "road_1_19_1", "road_1_20_1", "road_1_21_1", "road_1_22_1", "road_1_23_1", "road_1_24_1", "road_1_25_1", "road_1_26_1", "road_1_27_1", "road_1_28_0", "road_2_28_1"], "interval": 1.0, "startTime": 28, "endTime": 28},
{"vehicle": {"length": 5.0, "width": 2.0, "maxPosAcc": 2.0, "maxNegAcc": 4.5, "usualPosAcc": 2.0, "usualNegAcc": 4.5, "minGap": 2.5, "maxSpeed": 11.111, "headwayTime": 2}, "route": ["road_1_0_1", "road_1_1_1", "road_1_2_0", "road_2_2_0", "road_3_2_3", "road_3_1_3"], "interval": 1.0, "startTime": 28, "endTime": 28},
{"vehicle": {"length": 5.0, "width": 2.0, "maxPosAcc": 2.0, "maxNegAcc": 4.5, "usualPosAcc": 2.0, "usualNegAcc": 4.5, "minGap": 2.5, "maxSpeed": 11.111, "headwayTime": 2}, "route": ["road_0_14_0", "road_1_14_0", "road_2_14_0", "road_3_14_0", "road_4_14_0", "road_5_14_0", "road_6_14_0", "road_7_14_1", "road_7_15_1", "road_7_16_1", "road_7_17_1", "road_7_18_1", "road_7_19_1", "road_7_20_1", "road_7_21_1", "road_7_22_1", "road_7_23_1", "road_7_24_1", "road_7_25_0"], "interval": 1.0, "startTime": 38, "endTime": 38},
{"vehicle": {"length": 5.0, "width": 2.0, "maxPosAcc": 2.0, "maxNegAcc": 4.5, "usualPosAcc": 2.0, "usualNegAcc": 4.5, "minGap": 2.5, "maxSpeed": 11.111, "headwayTime": 2}, "route": ["road_3_0_1", "road_3_1_2", "road_2_1_2", "road_1_1_3"], "interval": 1.0, "startTime": 39, "endTime": 39},
{"vehicle": {"length": 5.0, "width": 2.0, "maxPosAcc": 2.0, "maxNegAcc": 4.5, "usualPosAcc": 2.0, "usualNegAcc": 4.5, "minGap": 2.5, "maxSpeed": 11.111, "headwayTime": 2}, "route": ["road_8_19_2", "road_7_19_3", "road_7_18_3", "road_7_17_3", "road_7_16_3", "road_7_15_3", "road_7_14_3", "road_7_13_3", "road_7_12_3", "road_7_11_3", "road_7_10_2", "road_6_10_2", "road_5_10_3", "road_5_9_3", "road_5_8_3", "road_5_7_3", "road_5_6_3", "road_5_5_3", "road_5_4_3", "road_5_3_3", "road_5_2_3", "road_5_1_3"], "interval": 1.0, "startTime": 41, "endTime": 41},
{"vehicle": {"length": 5.0, "width": 2.0, "maxPosAcc": 2.0, "maxNegAcc": 4.5, "usualPosAcc": 2.0, "usualNegAcc": 4.5, "minGap": 2.5, "maxSpeed": 11.111, "headwayTime": 2}, "route": ["road_0_14_0", "road_1_14_0", "road_2_14_0", "road_3_14_0", "road_4_14_0", "road_5_14_0", "road_6_14_0", "road_7_14_3", "road_7_13_3", "road_7_12_3", "road_7_11_0"], "interval": 1.0, "startTime": 42, "endTime": 42},
{"vehicle": {"length": 5.0, "width": 2.0, "maxPosAcc": 2.0, "maxNegAcc": 4.5, "usualPosAcc": 2.0, "usualNegAcc": 4.5, "minGap": 2.5, "maxSpeed": 11.111, "headwayTime": 2}, "route": ["road_0_23_0", "road_1_23_1", "road_1_24_0", "road_2_24_0", "road_3_24_0", "road_4_24_1", "road_4_25_1", "road_4_26_0", "road_5_26_0", "road_6_26_0", "road_7_26_1", "road_7_27_0"], "interval": 1.0, "startTime": 42, "endTime": 42},
{"vehicle": {"length": 5.0, "width": 2.0, "maxPosAcc": 2.0, "maxNegAcc": 4.5, "usualPosAcc": 2.0, "usualNegAcc": 4.5, "minGap": 2.5, "maxSpeed": 11.111, "headwayTime": 2}, "route": ["road_3_0_1", "road_3_1_2", "road_2_1_1", "road_2_2_0", "road_3_2_0", "road_4_2_0", "road_5_2_3", "road_5_1_2", "road_4_1_3"], "interval": 1.0, "startTime": 43, "endTime": 43},
{"vehicle": {"length": 5.0, "width": 2.0, "maxPosAcc": 2.0, "maxNegAcc": 4.5, "usualPosAcc": 2.0, "usualNegAcc": 4.5, "minGap": 2.5, "maxSpeed": 11.111, "headwayTime": 2}, "route": ["road_0_16_0", "road_1_16_0", "road_2_16_3", "road_2_15_3", "road_2_14_3", "road_2_13_3", "road_2_12_3", "road_2_11_3", "road_2_10_3", "road_2_9_3", "road_2_8_3", "road_2_7_3", "road_2_6_3", "road_2_5_3", "road_2_4_3", "road_2_3_3", "road_2_2_3", "road_2_1_3"], "interval": 1.0, "startTime": 44, "endTime": 44},
{"vehicle": {"length": 5.0, "width": 2.0, "maxPosAcc": 2.0, "maxNegAcc": 4.5, "usualPosAcc": 2.0, "usualNegAcc": 4.5, "minGap": 2.5, "maxSpeed": 11.111, "headwayTime": 2}, "route": ["road_3_29_3", "road_3_28_3", "road_3_27_2", "road_2_27_3", "road_2_26_3", "road_2_25_3", "road_2_24_3", "road_2_23_3", "road_2_22_3", "road_2_21_3", "road_2_20_3", "road_2_19_3", "road_2_18_3", "road_2_17_3", "road_2_16_3", "road_2_15_3", "road_2_14_3", "road_2_13_3", "road_2_12_3", "road_2_11_2", "road_1_11_2"], "interval": 1.0, "startTime": 45, "endTime": 45},
{"vehicle": {"length": 5.0, "width": 2.0, "maxPosAcc": 2.0, "maxNegAcc": 4.5, "usualPosAcc": 2.0, "usualNegAcc": 4.5, "minGap": 2.5, "maxSpeed": 11.111, "headwayTime": 2}, "route": ["road_3_0_1", "road_3_1_2", "road_2_1_2", "road_1_1_3"], "interval": 1.0, "startTime": 46, "endTime": 46},
{"vehicle": {"length": 5.0, "width": 2.0, "maxPosAcc": 2.0, "maxNegAcc": 4.5, "usualPosAcc": 2.0, "usualNegAcc": 4.5, "minGap": 2.5, "maxSpeed": 11.111, "headwayTime": 2}, "route": ["road_0_20_0", "road_1_20_0", "road_2_20_3", "road_2_19_3", "road_2_18_3", "road_2_17_3", "road_2_16_3", "road_2_15_3", "road_2_14_3", "road_2_13_3", "road_2_12_3", "road_2_11_3", "road_2_10_3", "road_2_9_3", "road_2_8_3", "road_2_7_3", "road_2_6_3", "road_2_5_3", "road_2_4_3", "road_2_3_3", "road_2_2_3", "road_2_1_2", "road_1_1_3"], "interval": 1.0, "startTime": 46, "endTime": 46},
{"vehicle": {"length": 5.0, "width": 2.0, "maxPosAcc": 2.0, "maxNegAcc": 4.5, "usualPosAcc": 2.0, "usualNegAcc": 4.5, "minGap": 2.5, "maxSpeed": 11.111, "headwayTime": 2}, "route": ["road_0_23_0", "road_1_23_1", "road_1_24_0", "road_2_24_3", "road_2_23_3", "road_2_22_3", "road_2_21_3", "road_2_20_3", "road_2_19_3", "road_2_18_3", "road_2_17_3", "road_2_16_3", "road_2_15_3", "road_2_14_3", "road_2_13_3", "road_2_12_3", "road_2_11_3", "road_2_10_3", "road_2_9_3", "road_2_8_3", "road_2_7_3", "road_2_6_3", "road_2_5_2", "road_1_5_1", "road_1_6_2"], "interval": 1.0, "startTime": 49, "endTime": 49},
{"vehicle": {"length": 5.0, "width": 2.0, "maxPosAcc": 2.0, "maxNegAcc": 4.5, "usualPosAcc": 2.0, "usualNegAcc": 4.5, "minGap": 2.5, "maxSpeed": 11.111, "headwayTime": 2}, "route": ["road_8_9_2", "road_7_9_2", "road_6_9_2", "road_5_9_2", "road_4_9_2", "road_3_9_2", "road_2_9_2", "road_1_9_1", "road_1_10_1", "road_1_11_1", "road_1_12_1", "road_1_13_1", "road_1_14_1", "road_1_15_1", "road_1_16_1", "road_1_17_1", "road_1_18_1", "road_1_19_1", "road_1_20_1", "road_1_21_1", "road_1_22_1", "road_1_23_1", "road_1_24_1", "road_1_25_1", "road_1_26_1", "road_1_27_1", "road_1_28_0", "road_2_28_1"], "interval": 1.0, "startTime": 50, "endTime": 50},
{"vehicle": {"length": 5.0, "width": 2.0, "maxPosAcc": 2.0, "maxNegAcc": 4.5, "usualPosAcc": 2.0, "usualNegAcc": 4.5, "minGap": 2.5, "maxSpeed": 11.111, "headwayTime": 2}, "route": ["road_1_0_1", "road_1_1_1", "road_1_2_0", "road_2_2_0", "road_3_2_0", "road_4_2_0", "road_5_2_0", "road_6_2_0", "road_7_2_1", "road_7_3_1", "road_7_4_0"], "interval": 1.0, "startTime": 50, "endTime": 50},
{"vehicle": {"length": 5.0, "width": 2.0, "maxPosAcc": 2.0, "maxNegAcc": 4.5, "usualPosAcc": 2.0, "usualNegAcc": 4.5, "minGap": 2.5, "maxSpeed": 11.111, "headwayTime": 2}, "route": ["road_0_23_0", "road_1_23_1", "road_1_24_0", "road_2_24_3", "road_2_23_3", "road_2_22_3", "road_2_21_3", "road_2_20_3", "road_2_19_3", "road_2_18_3", "road_2_17_3", "road_2_16_3", "road_2_15_3", "road_2_14_3", "road_2_13_3", "road_2_12_3", "road_2_11_3", "road_2_10_3", "road_2_9_3", "road_2_8_3", "road_2_7_3", "road_2_6_3", "road_2_5_3", "road_2_4_3", "road_2_3_3", "road_2_2_3", "road_2_1_2", "road_1_1_3"], "interval": 1.0, "startTime": 52, "endTime": 52},
{"vehicle": {"length": 5.0, "width": 2.0, "maxPosAcc": 2.0, "maxNegAcc": 4.5, "usualPosAcc": 2.0, "usualNegAcc": 4.5, "minGap": 2.5, "maxSpeed": 11.111, "headwayTime": 2}, "route": ["road_5_29_3", "road_5_28_3", "road_5_27_2", "road_4_27_2", "road_3_27_2", "road_2_27_1", "road_2_28_1"], "interval": 1.0, "startTime": 54, "endTime": 54},
{"vehicle": {"length": 5.0, "width": 2.0, "maxPosAcc": 2.0, "maxNegAcc": 4.5, "usualPosAcc": 2.0, "usualNegAcc": 4.5, "minGap": 2.5, "maxSpeed": 11.111, "headwayTime": 2}, "route": ["road_0_19_0", "road_1_19_1", "road_1_20_1", "road_1_21_1", "road_1_22_1", "road_1_23_1", "road_1_24_1", "road_1_25_1", "road_1_26_1", "road_1_27_1", "road_1_28_1"], "interval": 1.0, "startTime": 55, "endTime": 55},
{"vehicle": {"length": 5.0, "width": 2.0, "maxPosAcc": 2.0, "maxNegAcc": 4.5, "usualPosAcc": 2.0, "usualNegAcc": 4.5, "minGap": 2.5, "maxSpeed": 11.111, "headwayTime": 2}, "route": ["road_8_20_2", "road_7_20_3", "road_7_19_2", "road_6_19_2", "road_5_19_2", "road_4_19_2", "road_3_19_2", "road_2_19_3", "road_2_18_3", "road_2_17_3", "road_2_16_3", "road_2_15_3", "road_2_14_3", "road_2_13_3", "road_2_12_3", "road_2_11_3", "road_2_10_3", "road_2_9_3", "road_2_8_3", "road_2_7_2", "road_1_7_1", "road_1_8_2"], "interval": 1.0, "startTime": 56, "endTime": 56},
{"vehicle": {"length": 5.0, "width": 2.0, "maxPosAcc": 2.0, "maxNegAcc": 4.5, "usualPosAcc": 2.0, "usualNegAcc": 4.5, "minGap": 2.5, "maxSpeed": 11.111, "headwayTime": 2}, "route": ["road_1_29_3", "road_1_28_0", "road_2_28_3", "road_2_27_3", "road_2_26_3", "road_2_25_3", "road_2_24_3", "road_2_23_3", "road_2_22_3", "road_2_21_3", "road_2_20_3", "road_2_19_2", "road_1_19_2"], "interval": 1.0, "startTime": 56, "endTime": 56},
{"vehicle": {"length": 5.0, "width": 2.0, "maxPosAcc": 2.0, "maxNegAcc": 4.5, "usualPosAcc": 2.0, "usualNegAcc": 4.5, "minGap": 2.5, "maxSpeed": 11.111, "headwayTime": 2}, "route": ["road_8_10_2", "road_7_10_2", "road_6_10_2", "road_5_10_3", "road_5_9_2", "road_4_9_2", "road_3_9_3", "road_3_8_3", "road_3_7_3", "road_3_6_3", "road_3_5_3", "road_3_4_3", "road_3_3_3", "road_3_2_3", "road_3_1_2", "road_2_1_2", "road_1_1_3"], "interval": 1.0, "startTime": 60, "endTime": 60},
{"vehicle": {"length": 5.0, "width": 2.0, "maxPosAcc": 2.0, "maxNegAcc": 4.5, "usualPosAcc": 2.0, "usualNegAcc": 4.5, "minGap": 2.5, "maxSpeed": 11.111, "headwayTime": 2}, "route": ["road_8_17_2", "road_7_17_2", "road_6_17_2", "road_5_17_2", "road_4_17_2", "road_3_17_2", "road_2_17_3", "road_2_16_3", "road_2_15_3", "road_2_14_3", "road_2_13_3", "road_2_12_3", "road_2_11_2", "road_1_11_2"], "interval": 1.0, "startTime": 60, "endTime": 60},
{"vehicle": {"length": 5.0, "width": 2.0, "maxPosAcc": 2.0, "maxNegAcc": 4.5, "usualPosAcc": 2.0, "usualNegAcc": 4.5, "minGap": 2.5, "maxSpeed": 11.111, "headwayTime": 2}, "route": ["road_8_24_2", "road_7_24_3", "road_7_23_2", "road_6_23_2", "road_5_23_2", "road_4_23_2", "road_3_23_2", "road_2_23_3", "road_2_22_3", "road_2_21_3", "road_2_20_3", "road_2_19_2", "road_1_19_2"], "interval": 1.0, "startTime": 60, "endTime": 60},
{"vehicle": {"length": 5.0, "width": 2.0, "maxPosAcc": 2.0, "maxNegAcc": 4.5, "usualPosAcc": 2.0, "usualNegAcc": 4.5, "minGap": 2.5, "maxSpeed": 11.111, "headwayTime": 2}, "route": ["road_0_24_0", "road_1_24_0", "road_2_24_0", "road_3_24_0", "road_4_24_0", "road_5_24_0", "road_6_24_0", "road_7_24_3", "road_7_23_3", "road_7_22_0"], "interval": 1.0, "startTime": 60, "endTime": 60},
{"vehicle": {"length": 5.0, "width": 2.0, "maxPosAcc": 2.0, "maxNegAcc": 4.5, "usualPosAcc": 2.0, "usualNegAcc": 4.5, "minGap": 2.5, "maxSpeed": 11.111, "headwayTime": 2}, "route": ["road_0_8_0", "road_1_8_1", "road_1_9_1", "road_1_10_1", "road_1_11_1", "road_1_12_1", "road_1_13_1", "road_1_14_2"], "interval": 1.0, "startTime": 60, "endTime": 60},
{"vehicle": {"length": 5.0, "width": 2.0, "maxPosAcc": 2.0, "maxNegAcc": 4.5, "usualPosAcc": 2.0, "usualNegAcc": 4.5, "minGap": 2.5, "maxSpeed": 11.111, "headwayTime": 2}, "route": ["road_1_0_1", "road_1_1_1", "road_1_2_1", "road_1_3_1", "road_1_4_1", "road_1_5_1", "road_1_6_1", "road_1_7_1", "road_1_8_1", "road_1_9_1", "road_1_10_1", "road_1_11_1", "road_1_12_1", "road_1_13_1", "road_1_14_1", "road_1_15_1", "road_1_16_1", "road_1_17_1", "road_1_18_1", "road_1_19_1", "road_1_20_1", "road_1_21_1", "road_1_22_1", "road_1_23_1", "road_1_24_1", "road_1_25_1", "road_1_26_1", "road_1_27_1", "road_1_28_1"], "interval": 1.0, "startTime": 60, "endTime": 60},
{"vehicle": {"length": 5.0, "width": 2.0, "maxPosAcc": 2.0, "maxNegAcc": 4.5, "usualPosAcc": 2.0, "usualNegAcc": 4.5, "minGap": 2.5, "maxSpeed": 11.111, "headwayTime": 2}, "route": ["road_2_0_1", "road_2_1_2", "road_1_1_3"], "interval": 1.0, "startTime": 60, "endTime": 60},
{"vehicle": {"length": 5.0, "width": 2.0, "maxPosAcc": 2.0, "maxNegAcc": 4.5, "usualPosAcc": 2.0, "usualNegAcc": 4.5, "minGap": 2.5, "maxSpeed": 11.111, "headwayTime": 2}, "route": ["road_3_0_1", "road_3_1_2", "road_2_1_1", "road_2_2_0", "road_3_2_0", "road_4_2_0", "road_5_2_3", "road_5_1_2", "road_4_1_3"], "interval": 1.0, "startTime": 60, "endTime": 60},
{"vehicle": {"length": 5.0, "width": 2.0, "maxPosAcc": 2.0, "maxNegAcc": 4.5, "usualPosAcc": 2.0, "usualNegAcc": 4.5, "minGap": 2.5, "maxSpeed": 11.111, "headwayTime": 2}, "route": ["road_4_0_1", "road_4_1_2", "road_3_1_2", "road_2_1_2", "road_1_1_3"], "interval": 1.0, "startTime": 60, "endTime": 60},
{"vehicle": {"length": 5.0, "width": 2.0, "maxPosAcc": 2.0, "maxNegAcc": 4.5, "usualPosAcc": 2.0, "usualNegAcc": 4.5, "minGap": 2.5, "maxSpeed": 11.111, "headwayTime": 2}, "route": ["road_5_0_1", "road_5_1_2", "road_4_1_2", "road_3_1_2", "road_2_1_3"], "interval": 1.0, "startTime": 60, "endTime": 60},
{"vehicle": {"length": 5.0, "width": 2.0, "maxPosAcc": 2.0, "maxNegAcc": 4.5, "usualPosAcc": 2.0, "usualNegAcc": 4.5, "minGap": 2.5, "maxSpeed": 11.111, "headwayTime": 2}, "route": ["road_6_0_1", "road_6_1_2", "road_5_1_2", "road_4_1_2", "road_3_1_3"], "interval": 1.0, "startTime": 60, "endTime": 60},
{"vehicle": {"length": 5.0, "width": 2.0, "maxPosAcc": 2.0, "maxNegAcc": 4.5, "usualPosAcc": 2.0, "usualNegAcc": 4.5, "minGap": 2.5, "maxSpeed": 11.111, "headwayTime": 2}, "route": ["road_0_13_0", "road_1_13_1", "road_1_14_1", "road_1_15_1", "road_1_16_1", "road_1_17_1", "road_1_18_1", "road_1_19_1", "road_1_20_1", "road_1_21_1", "road_1_22_1", "road_1_23_1", "road_1_24_1", "road_1_25_1", "road_1_26_1", "road_1_27_1", "road_1_28_0", "road_2_28_1"], "interval": 1.0, "startTime": 60, "endTime": 60},
{"vehicle": {"length": 5.0, "width": 2.0, "maxPosAcc": 2.0, "maxNegAcc": 4.5, "usualPosAcc": 2.0, "usualNegAcc": 4.5, "minGap": 2.5, "maxSpeed": 11.111, "headwayTime": 2}, "route": ["road_0_2_0", "road_1_2_0", "road_2_2_3", "road_2_1_2", "road_1_1_3"], "interval": 1.0, "startTime": 60, "endTime": 60},
{"vehicle": {"length": 5.0, "width": 2.0, "maxPosAcc": 2.0, "maxNegAcc": 4.5, "usualPosAcc": 2.0, "usualNegAcc": 4.5, "minGap": 2.5, "maxSpeed": 11.111, "headwayTime": 2}, "route": ["road_0_22_0", "road_1_22_0", "road_2_22_3", "road_2_21_3", "road_2_20_3", "road_2_19_3", "road_2_18_3", "road_2_17_3", "road_2_16_3", "road_2_15_3", "road_2_14_3", "road_2_13_3", "road_2_12_3", "road_2_11_3", "road_2_10_3", "road_2_9_3", "road_2_8_3", "road_2_7_2", "road_1_7_2"], "interval": 1.0, "startTime": 60, "endTime": 60},
{"vehicle": {"length": 5.0, "width": 2.0, "maxPosAcc": 2.0, "maxNegAcc": 4.5, "usualPosAcc": 2.0, "usualNegAcc": 4.5, "minGap": 2.5, "maxSpeed": 11.111, "headwayTime": 2}, "route": ["road_0_10_0", "road_1_10_1", "road_1_11_1", "road_1_12_1", "road_1_13_1", "road_1_14_1", "road_1_15_1", "road_1_16_2"], "interval": 1.0, "startTime": 60, "endTime": 60},
{"vehicle": {"length": 5.0, "width": 2.0, "maxPosAcc": 2.0, "maxNegAcc": 4.5, "usualPosAcc": 2.0, "usualNegAcc": 4.5, "minGap": 2.5, "maxSpeed": 11.111, "headwayTime": 2}, "route": ["road_0_16_0", "road_1_16_0", "road_2_16_3", "road_2_15_3", "road_2_14_3", "road_2_13_3", "road_2_12_3", "road_2_11_3", "road_2_10_3", "road_2_9_3", "road_2_8_3", "road_2_7_3", "road_2_6_3", "road_2_5_3", "road_2_4_3", "road_2_3_3", "road_2_2_3", "road_2_1_2", "road_1_1_1", "road_1_2_1", "road_1_3_2"], "interval": 1.0, "startTime": 60, "endTime": 60},
{"vehicle": {"length": 5.0, "width": 2.0, "maxPosAcc": 2.0, "maxNegAcc": 4.5, "usualPosAcc": 2.0, "usualNegAcc": 4.5, "minGap": 2.5, "maxSpeed": 11.111, "headwayTime": 2}, "route": ["road_0_20_0", "road_1_20_0", "road_2_20_3", "road_2_19_3", "road_2_18_3", "road_2_17_3", "road_2_16_3", "road_2_15_3", "road_2_14_3", "road_2_13_3", "road_2_12_3", "road_2_11_3", "road_2_10_3", "road_2_9_3", "road_2_8_3", "road_2_7_3", "road_2_6_3", "road_2_5_3", "road_2_4_3", "road_2_3_3", "road_2_2_3", "road_2_1_3"], "interval": 1.0, "startTime": 60, "endTime": 60},
{"vehicle": {"length": 5.0, "width": 2.0, "maxPosAcc": 2.0, "maxNegAcc": 4.5, "usualPosAcc": 2.0, "usualNegAcc": 4.5, "minGap": 2.5, "maxSpeed": 11.111, "headwayTime": 2}, "route": ["road_5_29_3", "road_5_28_3", "road_5_27_3", "road_5_26_3", "road_5_25_3", "road_5_24_3", "road_5_23_3", "road_5_22_3", "road_5_21_3", "road_5_20_0", "road_6_20_0", "road_7_20_3", "road_7_19_0"], "interval": 1.0, "startTime": 60, "endTime": 60},
{"vehicle": {"length": 5.0, "width": 2.0, "maxPosAcc": 2.0, "maxNegAcc": 4.5, "usualPosAcc": 2.0, "usualNegAcc": 4.5, "minGap": 2.5, "maxSpeed": 11.111, "headwayTime": 2}, "route": ["road_1_29_3", "road_1_28_0", "road_2_28_3", "road_2_27_3", "road_2_26_3", "road_2_25_3", "road_2_24_3", "road_2_23_3", "road_2_22_3", "road_2_21_3", "road_2_20_3", "road_2_19_2", "road_1_19_1", "road_1_20_2"], "interval": 1.0, "startTime": 60, "endTime": 60},
{"vehicle": {"length": 5.0, "width": 2.0, "maxPosAcc": 2.0, "maxNegAcc": 4.5, "usualPosAcc": 2.0, "usualNegAcc": 4.5, "minGap": 2.5, "maxSpeed": 11.111, "headwayTime": 2}, "route": ["road_2_29_3", "road_2_28_0", "road_3_28_3", "road_3_27_2", "road_2_27_3", "road_2_26_3", "road_2_25_3", "road_2_24_3", "road_2_23_3", "road_2_22_3", "road_2_21_3", "road_2_20_3", "road_2_19_3", "road_2_18_3", "road_2_17_3", "road_2_16_3", "road_2_15_3", "road_2_14_3", "road_2_13_3", "road_2_12_3", "road_2_11_3", "road_2_10_3", "road_2_9_3", "road_2_8_3", "road_2_7_3", "road_2_6_3", "road_2_5_3", "road_2_4_3", "road_2_3_3", "road_2_2_3", "road_2_1_2", "road_1_1_3"], "interval": 1.0, "startTime": 60, "endTime": 60},
{"vehicle": {"length": 5.0, "width": 2.0, "maxPosAcc": 2.0, "maxNegAcc": 4.5, "usualPosAcc": 2.0, "usualNegAcc": 4.5, "minGap": 2.5, "maxSpeed": 11.111, "headwayTime": 2}, "route": ["road_3_29_3", "road_3_28_3", "road_3_27_3", "road_3_26_3", "road_3_25_3", "road_3_24_3", "road_3_23_3", "road_3_22_3", "road_3_21_3", "road_3_20_3", "road_3_19_3", "road_3_18_3", "road_3_17_3", "road_3_16_3", "road_3_15_3", "road_3_14_3", "road_3_13_3", "road_3_12_3", "road_3_11_3", "road_3_10_3", "road_3_9_3", "road_3_8_3", "road_3_7_3", "road_3_6_3", "road_3_5_3", "road_3_4_3", "road_3_3_3", "road_3_2_3", "road_3_1_2", "road_2_1_3"], "interval": 1.0, "startTime": 60, "endTime": 60},
{"vehicle": {"length": 5.0, "width": 2.0, "maxPosAcc": 2.0, "maxNegAcc": 4.5, "usualPosAcc": 2.0, "usualNegAcc": 4.5, "minGap": 2.5, "maxSpeed": 11.111, "headwayTime": 2}, "route": ["road_4_29_3", "road_4_28_0", "road_5_28_3", "road_5_27_3", "road_5_26_3", "road_5_25_2", "road_4_25_2", "road_3_25_2", "road_2_25_3", "road_2_24_3", "road_2_23_3", "road_2_22_3", "road_2_21_3", "road_2_20_3", "road_2_19_3", "road_2_18_3", "road_2_17_3", "road_2_16_3", "road_2_15_3", "road_2_14_3", "road_2_13_3", "road_2_12_3", "road_2_11_3", "road_2_10_3", "road_2_9_3", "road_2_8_3", "road_2_7_3", "road_2_6_3", "road_2_5_3", "road_2_4_3", "road_2_3_3", "road_2_2_3", "road_2_1_2", "road_1_1_3"], "interval": 1.0, "startTime": 60, "endTime": 60},
{"vehicle": {"length": 5.0, "width": 2.0, "maxPosAcc": 2.0, "maxNegAcc": 4.5, "usualPosAcc": 2.0, "usualNegAcc": 4.5, "minGap": 2.5, "maxSpeed": 11.111, "headwayTime": 2}, "route": ["road_6_29_3", "road_6_28_0", "road_7_28_3", "road_7_27_2", "road_6_27_2", "road_5_27_3", "road_5_26_3", "road_5_25_2", "road_4_25_2", "road_3_25_2", "road_2_25_3", "road_2_24_3", "road_2_23_3", "road_2_22_3", "road_2_21_3", "road_2_20_3", "road_2_19_3", "road_2_18_3", "road_2_17_3", "road_2_16_3", "road_2_15_3", "road_2_14_3", "road_2_13_3", "road_2_12_3", "road_2_11_3", "road_2_10_3", "road_2_9_3", "road_2_8_3", "road_2_7_2", "road_1_7_2"], "interval": 1.0, "startTime": 60, "endTime": 60},
{"vehicle": {"length": 5.0, "width": 2.0, "maxPosAcc": 2.0, "maxNegAcc": 4.5, "usualPosAcc": 2.0, "usualNegAcc": 4.5, "minGap": 2.5, "maxSpeed": 11.111, "headwayTime": 2}, "route": ["road_0_26_0", "road_1_26_0", "road_2_26_0", "road_3_26_3", "road_3_25_3", "road_3_24_3", "road_3_23_3", "road_3_22_3", "road_3_21_3", "road_3_20_3", "road_3_19_3", "road_3_18_3", "road_3_17_3", "road_3_16_3", "road_3_15_3", "road_3_14_3", "road_3_13_3", "road_3_12_3", "road_3_11_3", "road_3_10_3", "road_3_9_3", "road_3_8_3", "road_3_7_3", "road_3_6_3", "road_3_5_3", "road_3_4_3", "road_3_3_3", "road_3_2_0", "road_4_2_0", "road_5_2_3", "road_5_1_2", "road_4_1_3"], "interval": 1.0, "startTime": 60, "endTime": 60},
{"vehicle": {"length": 5.0, "width": 2.0, "maxPosAcc": 2.0, "maxNegAcc": 4.5, "usualPosAcc": 2.0, "usualNegAcc": 4.5, "minGap": 2.5, "maxSpeed": 11.111, "headwayTime": 2}, "route": ["road_0_4_0", "road_1_4_1", "road_1_5_1", "road_1_6_1", "road_1_7_1", "road_1_8_1", "road_1_9_1", "road_1_10_1", "road_1_11_1", "road_1_12_1", "road_1_13_1", "road_1_14_1", "road_1_15_1", "road_1_16_1", "road_1_17_1", "road_1_18_1", "road_1_19_1", "road_1_20_1", "road_1_21_1", "road_1_22_2"], "interval": 1.0, "startTime": 60, "endTime": 60},
{"vehicle": {"length": 5.0, "width": 2.0, "maxPosAcc": 2.0, "maxNegAcc": 4.5, "usualPosAcc": 2.0, "usualNegAcc": 4.5, "minGap": 2.5, "maxSpeed": 11.111, "headwayTime": 2}, "route": ["road_0_14_0", "road_1_14_0", "road_2_14_3", "road_2_13_3", "road_2_12_3", "road_2_11_3", "road_2_10_3", "road_2_9_3", "road_2_8_3", "road_2_7_3", "road_2_6_3", "road_2_5_3", "road_2_4_3", "road_2_3_3", "road_2_2_0", "road_3_2_0", "road_4_2_0", "road_5_2_3", "road_5_1_2", "road_4_1_3"], "interval": 1.0, "startTime": 60, "endTime": 60},
{"vehicle": {"length": 5.0, "width": 2.0, "maxPosAcc": 2.0, "maxNegAcc": 4.5, "usualPosAcc": 2.0, "usualNegAcc": 4.5, "minGap": 2.5, "maxSpeed": 11.111, "headwayTime": 2}, "route": ["road_0_17_0", "road_1_17_0", "road_2_17_3", "road_2_16_3", "road_2_15_3", "road_2_14_3", "road_2_13_3", "road_2_12_3", "road_2_11_3", "road_2_10_3", "road_2_9_3", "road_2_8_3", "road_2_7_3", "road_2_6_3", "road_2_5_3", "road_2_4_3", "road_2_3_3", "road_2_2_3", "road_2_1_2", "road_1_1_3"], "interval": 1.0, "startTime": 60, "endTime": 60},
{"vehicle": {"length": 5.0, "width": 2.0, "maxPosAcc": 2.0, "maxNegAcc": 4.5, "usualPosAcc": 2.0, "usualNegAcc": 4.5, "minGap": 2.5, "maxSpeed": 11.111, "headwayTime": 2}, "route": ["road_0_21_0", "road_1_21_1", "road_1_22_1", "road_1_23_1", "road_1_24_1", "road_1_25_1", "road_1_26_1", "road_1_27_1", "road_1_28_0", "road_2_28_1"], "interval": 1.0, "startTime": 60, "endTime": 60},
{"vehicle": {"length": 5.0, "width": 2.0, "maxPosAcc": 2.0, "maxNegAcc": 4.5, "usualPosAcc": 2.0, "usualNegAcc": 4.5, "minGap": 2.5, "maxSpeed": 11.111, "headwayTime": 2}, "route": ["road_0_25_0", "road_1_25_1", "road_1_26_0", "road_2_26_3", "road_2_25_3", "road_2_24_3", "road_2_23_3", "road_2_22_3", "road_2_21_3", "road_2_20_3", "road_2_19_3", "road_2_18_3", "road_2_17_3", "road_2_16_3", "road_2_15_3", "road_2_14_3", "road_2_13_3", "road_2_12_3", "road_2_11_3", "road_2_10_3", "road_2_9_3", "road_2_8_3", "road_2_7_3", "road_2_6_3", "road_2_5_3", "road_2_4_3", "road_2_3_3", "road_2_2_3", "road_2_1_2", "road_1_1_3"], "interval": 1.0, "startTime": 60, "endTime": 60},
{"vehicle": {"length": 5.0, "width": 2.0, "maxPosAcc": 2.0, "maxNegAcc": 4.5, "usualPosAcc": 2.0, "usualNegAcc": 4.5, "minGap": 2.5, "maxSpeed": 11.111, "headwayTime": 2}, "route": ["road_2_0_1", "road_2_1_2", "road_1_1_1", "road_1_2_1", "road_1_3_1", "road_1_4_1", "road_1_5_1", "road_1_6_1", "road_1_7_1", "road_1_8_1", "road_1_9_1", "road_1_10_1", "road_1_11_1", "road_1_12_1", "road_1_13_1", "road_1_14_1", "road_1_15_1", "road_1_16_1", "road_1_17_1", "road_1_18_1", "road_1_19_2"], "interval": 1.0, "startTime": 60, "endTime": 60},
{"vehicle": {"length": 5.0, "width": 2.0, "maxPosAcc": 2.0, "maxNegAcc": 4.5, "usualPosAcc": 2.0, "usualNegAcc": 4.5, "minGap": 2.5, "maxSpeed": 11.111, "headwayTime": 2}, "route": ["road_0_20_0", "road_1_20_0", "road_2_20_3", "road_2_19_3", "road_2_18_3", "road_2_17_3", "road_2_16_3", "road_2_15_3", "road_2_14_3", "road_2_13_3", "road_2_12_3", "road_2_11_3", "road_2_10_3", "road_2_9_3", "road_2_8_3", "road_2_7_3", "road_2_6_3", "road_2_5_3", "road_2_4_3", "road_2_3_3", "road_2_2_3", "road_2_1_2", "road_1_1_3"], "interval": 1.0, "startTime": 61, "endTime": 61},
{"vehicle": {"length": 5.0, "width": 2.0, "maxPosAcc": 2.0, "maxNegAcc": 4.5, "usualPosAcc": 2.0, "usualNegAcc": 4.5, "minGap": 2.5, "maxSpeed": 11.111, "headwayTime": 2}, "route": ["road_8_2_2", "road_7_2_3", "road_7_1_3"], "interval": 1.0, "startTime": 62, "endTime": 62},
{"vehicle": {"length": 5.0, "width": 2.0, "maxPosAcc": 2.0, "maxNegAcc": 4.5, "usualPosAcc": 2.0, "usualNegAcc": 4.5, "minGap": 2.5, "maxSpeed": 11.111, "headwayTime": 2}, "route": ["road_8_6_2", "road_7_6_3", "road_7_5_2", "road_6_5_2", "road_5_5_2", "road_4_5_2", "road_3_5_3", "road_3_4_3", "road_3_3_3", "road_3_2_3", "road_3_1_2", "road_2_1_2", "road_1_1_3"], "interval": 1.0, "startTime": 62, "endTime": 62},
{"vehicle": {"length": 5.0, "width": 2.0, "maxPosAcc": 2.0, "maxNegAcc": 4.5, "usualPosAcc": 2.0, "usualNegAcc": 4.5, "minGap": 2.5, "maxSpeed": 11.111, "headwayTime": 2}, "route": ["road_8_9_2", "road_7_9_2", "road_6_9_2", "road_5_9_2", "road_4_9_2", "road_3_9_3", "road_3_8_3", "road_3_7_3", "road_3_6_3", "road_3_5_3", "road_3_4_3", "road_3_3_3", "road_3_2_3", "road_3_1_2", "road_2_1_2", "road_1_1_3"], "interval": 1.0, "startTime": 62, "endTime": 62},
{"vehicle": {"length": 5.0, "width": 2.0, "maxPosAcc": 2.0, "maxNegAcc": 4.5, "usualPosAcc": 2.0, "usualNegAcc": 4.5, "minGap": 2.5, "maxSpeed": 11.111, "headwayTime": 2}, "route": ["road_8_11_2", "road_7_11_2", "road_6_11_2", "road_5_11_3", "road_5_10_3", "road_5_9_3", "road_5_8_3", "road_5_7_3", "road_5_6_3", "road_5_5_3", "road_5_4_3", "road_5_3_3", "road_5_2_3", "road_5_1_3"], "interval": 1.0, "startTime": 62, "endTime": 62},
{"vehicle": {"length": 5.0, "width": 2.0, "maxPosAcc": 2.0, "maxNegAcc": 4.5, "usualPosAcc": 2.0, "usualNegAcc": 4.5, "minGap": 2.5, "maxSpeed": 11.111, "headwayTime": 2}, "route": ["road_8_12_2", "road_7_12_3", "road_7_11_2", "road_6_11_2", "road_5_11_2", "road_4_11_2", "road_3_11_3", "road_3_10_3", "road_3_9_3", "road_3_8_3", "road_3_7_3", "road_3_6_3", "road_3_5_3", "road_3_4_3", "road_3_3_3", "road_3_2_3", "road_3_1_2", "road_2_1_3"], "interval": 1.0, "startTime": 62, "endTime": 62},
{"vehicle": {"length": 5.0, "width": 2.0, "maxPosAcc": 2.0, "maxNegAcc": 4.5, "usualPosAcc": 2.0, "usualNegAcc": 4.5, "minGap": 2.5, "maxSpeed": 11.111, "headwayTime": 2}, "route": ["road_8_13_2", "road_7_13_2", "road_6_13_2", "road_5_13_3", "road_5_12_3", "road_5_11_3", "road_5_10_2", "road_4_10_2", "road_3_10_3", "road_3_9_3", "road_3_8_3", "road_3_7_3", "road_3_6_3", "road_3_5_3", "road_3_4_3", "road_3_3_3", "road_3_2_3", "road_3_1_2", "road_2_1_2", "road_1_1_3"], "interval": 1.0, "startTime": 62, "endTime": 62},
{"vehicle": {"length": 5.0, "width": 2.0, "maxPosAcc": 2.0, "maxNegAcc": 4.5, "usualPosAcc": 2.0, "usualNegAcc": 4.5, "minGap": 2.5, "maxSpeed": 11.111, "headwayTime": 2}, "route": ["road_8_14_2", "road_7_14_3", "road_7_13_2", "road_6_13_2", "road_5_13_3", "road_5_12_3", "road_5_11_3", "road_5_10_2", "road_4_10_2", "road_3_10_3", "road_3_9_3", "road_3_8_3", "road_3_7_3", "road_3_6_3", "road_3_5_3", "road_3_4_3", "road_3_3_3", "road_3_2_3", "road_3_1_3"], "interval": 1.0, "startTime": 62, "endTime": 62},
{"vehicle": {"length": 5.0, "width": 2.0, "maxPosAcc": 2.0, "maxNegAcc": 4.5, "usualPosAcc": 2.0, "usualNegAcc": 4.5, "minGap": 2.5, "maxSpeed": 11.111, "headwayTime": 2}, "route": ["road_8_18_2", "road_7_18_3", "road_7_17_3", "road_7_16_3", "road_7_15_3", "road_7_14_3", "road_7_13_3", "road_7_12_3", "road_7_11_3", "road_7_10_2", "road_6_10_2", "road_5_10_2", "road_4_10_2", "road_3_10_3", "road_3_9_3", "road_3_8_3", "road_3_7_2", "road_2_7_2", "road_1_7_1", "road_1_8_2"], "interval": 1.0, "startTime": 62, "endTime": 62},
{"vehicle": {"length": 5.0, "width": 2.0, "maxPosAcc": 2.0, "maxNegAcc": 4.5, "usualPosAcc": 2.0, "usualNegAcc": 4.5, "minGap": 2.5, "maxSpeed": 11.111, "headwayTime": 2}, "route": ["road_8_21_2", "road_7_21_2", "road_6_21_2", "road_5_21_2", "road_4_21_2", "road_3_21_2", "road_2_21_2", "road_1_21_1", "road_1_22_1", "road_1_23_1", "road_1_24_1", "road_1_25_1", "road_1_26_1", "road_1_27_1", "road_1_28_1"], "interval": 1.0, "startTime": 62, "endTime": 62},
{"vehicle": {"length": 5.0, "width": 2.0, "maxPosAcc": 2.0, "maxNegAcc": 4.5, "usualPosAcc": 2.0, "usualNegAcc": 4.5, "minGap": 2.5, "maxSpeed": 11.111, "headwayTime": 2}, "route": ["road_8_23_2", "road_7_23_2", "road_6_23_2", "road_5_23_2", "road_4_23_2", "road_3_23_2", "road_2_23_3", "road_2_22_3", "road_2_21_3", "road_2_20_3", "road_2_19_3", "road_2_18_3", "road_2_17_3", "road_2_16_3", "road_2_15_3", "road_2_14_3", "road_2_13_3", "road_2_12_3", "road_2_11_3", "road_2_10_3", "road_2_9_3", "road_2_8_3", "road_2_7_3", "road_2_6_3", "road_2_5_2", "road_1_5_2"], "interval": 1.0, "startTime": 62, "endTime": 62},
{"vehicle": {"length": 5.0, "width": 2.0, "maxPosAcc": 2.0, "maxNegAcc": 4.5, "usualPosAcc": 2.0, "usualNegAcc": 4.5, "minGap": 2.5, "maxSpeed": 11.111, "headwayTime": 2}, "route": ["road_8_24_2", "road_7_24_3", "road_7_23_2", "road_6_23_2", "road_5_23_2", "road_4_23_2", "road_3_23_2", "road_2_23_3", "road_2_22_3", "road_2_21_3", "road_2_20_3", "road_2_19_3", "road_2_18_3", "road_2_17_3", "road_2_16_3", "road_2_15_3", "road_2_14_3", "road_2_13_3", "road_2_12_3", "road_2_11_2", "road_1_11_2"], "interval": 1.0, "startTime": 62, "endTime": 62},
{"vehicle": {"length": 5.0, "width": 2.0, "maxPosAcc": 2.0, "maxNegAcc": 4.5, "usualPosAcc": 2.0, "usualNegAcc": 4.5, "minGap": 2.5, "maxSpeed": 11.111, "headwayTime": 2}, "route": ["road_8_27_2", "road_7_27_2", "road_6_27_2", "road_5_27_2", "road_4_27_2", "road_3_27_2", "road_2_27_2", "road_1_27_1", "road_1_28_0", "road_2_28_1"], "interval": 1.0, "startTime": 62, "endTime": 62},
{"vehicle": {"length": 5.0, "width": 2.0, "maxPosAcc": 2.0, "maxNegAcc": 4.5, "usualPosAcc": 2.0, "usualNegAcc": 4.5, "minGap": 2.5, "maxSpeed": 11.111, "headwayTime": 2}, "route": ["road_1_0_1", "road_1_1_1", "road_1_2_0", "road_2_2_1", "road_2_3_1", "road_2_4_1", "road_2_5_1", "road_2_6_1", "road_2_7_1", "road_2_8_1", "road_2_9_1", "road_2_10_1", "road_2_11_1", "road_2_12_1", "road_2_13_1", "road_2_14_1", "road_2_15_1", "road_2_16_1", "road_2_17_1", "road_2_18_1", "road_2_19_1", "road_2_20_1", "road_2_21_1", "road_2_22_1", "road_2_23_1", "road_2_24_1", "road_2_25_1", "road_2_26_0", "road_3_26_0", "road_4_26_1", "road_4_27_1", "road_4_28_1"], "interval": 1.0, "startTime": 62, "endTime": 62},
{"vehicle": {"length": 5.0, "width": 2.0, "maxPosAcc": 2.0, "maxNegAcc": 4.5, "usualPosAcc": 2.0, "usualNegAcc": 4.5, "minGap": 2.5, "maxSpeed": 11.111, "headwayTime": 2}, "route": ["road_2_0_1", "road_2_1_1", "road_2_2_0", "road_3_2_0", "road_4_2_0", "road_5_2_3", "road_5_1_2", "road_4_1_3"], "interval": 1.0, "startTime": 62, "endTime": 62},
{"vehicle": {"length": 5.0, "width": 2.0, "maxPosAcc": 2.0, "maxNegAcc": 4.5, "usualPosAcc": 2.0, "usualNegAcc": 4.5, "minGap": 2.5, "maxSpeed": 11.111, "headwayTime": 2}, "route": ["road_3_0_1", "road_3_1_2", "road_2_1_1", "road_2_2_1", "road_2_3_1", "road_2_4_1", "road_2_5_1", "road_2_6_1", "road_2_7_1", "road_2_8_1", "road_2_9_1", "road_2_10_1", "road_2_11_1", "road_2_12_1", "road_2_13_1", "road_2_14_1", "road_2_15_1", "road_2_16_1", "road_2_17_1", "road_2_18_1", "road_2_19_1", "road_2_20_1", "road_2_21_1", "road_2_22_1", "road_2_23_1", "road_2_24_1", "road_2_25_1", "road_2_26_1", "road_2_27_1", "road_2_28_0", "road_3_28_1"], "interval": 1.0, "startTime": 62, "endTime": 62},
{"vehicle": {"length": 5.0, "width": 2.0, "maxPosAcc": 2.0, "maxNegAcc": 4.5, "usualPosAcc": 2.0, "usualNegAcc": 4.5, "minGap": 2.5, "maxSpeed": 11.111, "headwayTime": 2}, "route": ["road_4_0_1", "road_4_1_2", "road_3_1_2", "road_2_1_2", "road_1_1_3"], "interval": 1.0, "startTime": 62, "endTime": 62},
{"vehicle": {"length": 5.0, "width": 2.0, "maxPosAcc": 2.0, "maxNegAcc": 4.5, "usualPosAcc": 2.0, "usualNegAcc": 4.5, "minGap": 2.5, "maxSpeed": 11.111, "headwayTime": 2}, "route": ["road_5_0_1", "road_5_1_2", "road_4_1_2", "road_3_1_2", "road_2_1_2", "road_1_1_1", "road_1_2_1", "road_1_3_1", "road_1_4_1", "road_1_5_1", "road_1_6_1", "road_1_7_1", "road_1_8_1", "road_1_9_1", "road_1_10_1", "road_1_11_1", "road_1_12_2"], "interval": 1.0, "startTime": 62, "endTime": 62},
{"vehicle": {"length": 5.0, "width": 2.0, "maxPosAcc": 2.0, "maxNegAcc": 4.5, "usualPosAcc": 2.0, "usualNegAcc": 4.5, "minGap": 2.5, "maxSpeed": 11.111, "headwayTime": 2}, "route": ["road_6_0_1", "road_6_1_2", "road_5_1_2", "road_4_1_2", "road_3_1_3"], "interval": 1.0, "startTime": 62, "endTime": 62},
{"vehicle": {"length": 5.0, "width": 2.0, "maxPosAcc": 2.0, "maxNegAcc": 4.5, "usualPosAcc": 2.0, "usualNegAcc": 4.5, "minGap": 2.5, "maxSpeed": 11.111, "headwayTime": 2}, "route": ["road_0_22_0", "road_1_22_0", "road_2_22_0", "road_3_22_0", "road_4_22_0", "road_5_22_3", "road_5_21_3", "road_5_20_3", "road_5_19_3", "road_5_18_3", "road_5_17_0", "road_6_17_0", "road_7_17_3", "road_7_16_3", "road_7_15_3", "road_7_14_3", "road_7_13_3", "road_7_12_3", "road_7_11_3", "road_7_10_0"], "interval": 1.0, "startTime": 62, "endTime": 62},
{"vehicle": {"length": 5.0, "width": 2.0, "maxPosAcc": 2.0, "maxNegAcc": 4.5, "usualPosAcc": 2.0, "usualNegAcc": 4.5, "minGap": 2.5, "maxSpeed": 11.111, "headwayTime": 2}, "route": ["road_0_10_0", "road_1_10_0", "road_2_10_1", "road_2_11_1", "road_2_12_1", "road_2_13_1", "road_2_14_1", "road_2_15_1", "road_2_16_1", "road_2_17_1", "road_2_18_1", "road_2_19_1", "road_2_20_1", "road_2_21_1", "road_2_22_1", "road_2_23_1", "road_2_24_1", "road_2_25_1", "road_2_26_1", "road_2_27_1", "road_2_28_1"], "interval": 1.0, "startTime": 62, "endTime": 62},
{"vehicle": {"length": 5.0, "width": 2.0, "maxPosAcc": 2.0, "maxNegAcc": 4.5, "usualPosAcc": 2.0, "usualNegAcc": 4.5, "minGap": 2.5, "maxSpeed": 11.111, "headwayTime": 2}, "route": ["road_0_16_0", "road_1_16_0", "road_2_16_3", "road_2_15_3", "road_2_14_3", "road_2_13_3", "road_2_12_3", "road_2_11_3", "road_2_10_3", "road_2_9_3", "road_2_8_3", "road_2_7_3", "road_2_6_3", "road_2_5_3", "road_2_4_3", "road_2_3_3", "road_2_2_3", "road_2_1_2", "road_1_1_3"], "interval": 1.0, "startTime": 62, "endTime": 62},
{"vehicle": {"length": 5.0, "width": 2.0, "maxPosAcc": 2.0, "maxNegAcc": 4.5, "usualPosAcc": 2.0, "usualNegAcc": 4.5, "minGap": 2.5, "maxSpeed": 11.111, "headwayTime": 2}, "route": ["road_0_5_0", "road_1_5_1", "road_1_6_1", "road_1_7_1", "road_1_8_1", "road_1_9_1", "road_1_10_1", "road_1_11_1", "road_1_12_1", "road_1_13_1", "road_1_14_1", "road_1_15_1", "road_1_16_1", "road_1_17_1", "road_1_18_1", "road_1_19_1", "road_1_20_1", "road_1_21_1", "road_1_22_1", "road_1_23_1", "road_1_24_2"], "interval": 1.0, "startTime": 62, "endTime": 62},
{"vehicle": {"length": 5.0, "width": 2.0, "maxPosAcc": 2.0, "maxNegAcc": 4.5, "usualPosAcc": 2.0, "usualNegAcc": 4.5, "minGap": 2.5, "maxSpeed": 11.111, "headwayTime": 2}, "route": ["road_0_18_0", "road_1_18_1", "road_1_19_1", "road_1_20_1", "road_1_21_1", "road_1_22_1", "road_1_23_1", "road_1_24_1", "road_1_25_2"], "interval": 1.0, "startTime": 62, "endTime": 62},
{"vehicle": {"length": 5.0, "width": 2.0, "maxPosAcc": 2.0, "maxNegAcc": 4.5, "usualPosAcc": 2.0, "usualNegAcc": 4.5, "minGap": 2.5, "maxSpeed": 11.111, "headwayTime": 2}, "route": ["road_0_11_0", "road_1_11_1", "road_1_12_0", "road_2_12_3", "road_2_11_3", "road_2_10_3", "road_2_9_3", "road_2_8_3", "road_2_7_3", "road_2_6_3", "road_2_5_3", "road_2_4_3", "road_2_3_3", "road_2_2_3", "road_2_1_2", "road_1_1_3"], "interval": 1.0, "startTime": 62, "endTime": 62},
{"vehicle": {"length": 5.0, "width": 2.0, "maxPosAcc": 2.0, "maxNegAcc": 4.5, "usualPosAcc": 2.0, "usualNegAcc": 4.5, "minGap": 2.5, "maxSpeed": 11.111, "headwayTime": 2}, "route": ["road_0_12_0", "road_1_12_1", "road_1_13_1", "road_1_14_1", "road_1_15_1", "road_1_16_1", "road_1_17_1", "road_1_18_1", "road_1_19_1", "road_1_20_1", "road_1_21_1", "road_1_22_1", "road_1_23_1", "road_1_24_1", "road_1_25_1", "road_1_26_1", "road_1_27_1", "road_1_28_0", "road_2_28_1"], "interval": 1.0, "startTime": 62, "endTime": 62},
{"vehicle": {"length": 5.0, "width": 2.0, "maxPosAcc": 2.0, "maxNegAcc": 4.5, "usualPosAcc": 2.0, "usualNegAcc": 4.5, "minGap": 2.5, "maxSpeed": 11.111, "headwayTime": 2}, "route": ["road_5_29_3", "road_5_28_3", "road_5_27_3", "road_5_26_3", "road_5_25_3", "road_5_24_3", "road_5_23_3", "road_5_22_3", "road_5_21_3", "road_5_20_3", "road_5_19_3", "road_5_18_3", "road_5_17_0", "road_6_17_0", "road_7_17_3", "road_7_16_3", "road_7_15_3", "road_7_14_3", "road_7_13_3", "road_7_12_3", "road_7_11_3", "road_7_10_3", "road_7_9_0"], "interval": 1.0, "startTime": 62, "endTime": 62},
{"vehicle": {"length": 5.0, "width": 2.0, "maxPosAcc": 2.0, "maxNegAcc": 4.5, "usualPosAcc": 2.0, "usualNegAcc": 4.5, "minGap": 2.5, "maxSpeed": 11.111, "headwayTime": 2}, "route": ["road_1_29_3", "road_1_28_0", "road_2_28_3", "road_2_27_3", "road_2_26_3", "road_2_25_3", "road_2_24_3", "road_2_23_3", "road_2_22_3", "road_2_21_2", "road_1_21_1", "road_1_22_2"], "interval": 1.0, "startTime": 62, "endTime": 62},
{"vehicle": {"length": 5.0, "width": 2.0, "maxPosAcc": 2.0, "maxNegAcc": 4.5, "usualPosAcc": 2.0, "usualNegAcc": 4.5, "minGap": 2.5, "maxSpeed": 11.111, "headwayTime": 2}, "route": ["road_2_29_3", "road_2_28_0", "road_3_28_3", "road_3_27_2", "road_2_27_3", "road_2_26_3", "road_2_25_3", "road_2_24_3", "road_2_23_3", "road_2_22_3", "road_2_21_3", "road_2_20_3", "road_2_19_3", "road_2_18_3", "road_2_17_3", "road_2_16_3", "road_2_15_3", "road_2_14_3", "road_2_13_3", "road_2_12_3", "road_2_11_3", "road_2_10_3", "road_2_9_3", "road_2_8_3", "road_2_7_3", "road_2_6_3", "road_2_5_3", "road_2_4_3", "road_2_3_3", "road_2_2_3", "road_2_1_2", "road_1_1_3"], "interval": 1.0, "startTime": 62, "endTime": 62},
{"vehicle": {"length": 5.0, "width": 2.0, "maxPosAcc": 2.0, "maxNegAcc": 4.5, "usualPosAcc": 2.0, "usualNegAcc": 4.5, "minGap": 2.5, "maxSpeed": 11.111, "headwayTime": 2}, "route": ["road_3_29_3", "road_3_28_3", "road_3_27_2", "road_2_27_3", "road_2_26_3", "road_2_25_3", "road_2_24_3", "road_2_23_3", "road_2_22_3", "road_2_21_3", "road_2_20_3", "road_2_19_3", "road_2_18_3", "road_2_17_3", "road_2_16_3", "road_2_15_3", "road_2_14_3", "road_2_13_3", "road_2_12_3", "road_2_11_3", "road_2_10_3", "road_2_9_3", "road_2_8_3", "road_2_7_3", "road_2_6_3", "road_2_5_2", "road_1_5_1", "road_1_6_2"], "interval": 1.0, "startTime": 62, "endTime": 62},
{"vehicle": {"length": 5.0, "width": 2.0, "maxPosAcc": 2.0, "maxNegAcc": 4.5, "usualPosAcc": 2.0, "usualNegAcc": 4.5, "minGap": 2.5, "maxSpeed": 11.111, "headwayTime": 2}, "route": ["road_6_29_3", "road_6_28_0", "road_7_28_3", "road_7_27_2", "road_6_27_2", "road_5_27_3", "road_5_26_3", "road_5_25_2", "road_4_25_2", "road_3_25_2", "road_2_25_3", "road_2_24_3", "road_2_23_3", "road_2_22_3", "road_2_21_3", "road_2_20_3", "road_2_19_3", "road_2_18_3", "road_2_17_3", "road_2_16_3", "road_2_15_3", "road_2_14_3", "road_2_13_3", "road_2_12_3", "road_2_11_3", "road_2_10_3", "road_2_9_3", "road_2_8_3", "road_2_7_3", "road_2_6_3", "road_2_5_3", "road_2_4_3", "road_2_3_3", "road_2_2_3", "road_2_1_2", "road_1_1_3"], "interval": 1.0, "startTime": 62, "endTime": 62},
{"vehicle": {"length": 5.0, "width": 2.0, "maxPosAcc": 2.0, "maxNegAcc": 4.5, "usualPosAcc": 2.0, "usualNegAcc": 4.5, "minGap": 2.5, "maxSpeed": 11.111, "headwayTime": 2}, "route": ["road_0_26_0", "road_1_26_0", "road_2_26_0", "road_3_26_0", "road_4_26_0", "road_5_26_3", "road_5_25_3", "road_5_24_3", "road_5_23_3", "road_5_22_3", "road_5_21_3", "road_5_20_0", "road_6_20_0", "road_7_20_3", "road_7_19_3", "road_7_18_3", "road_7_17_3", "road_7_16_0"], "interval": 1.0, "startTime": 62, "endTime": 62},
{"vehicle": {"length": 5.0, "width": 2.0, "maxPosAcc": 2.0, "maxNegAcc": 4.5, "usualPosAcc": 2.0, "usualNegAcc": 4.5, "minGap": 2.5, "maxSpeed": 11.111, "headwayTime": 2}, "route": ["road_0_17_0", "road_1_17_1", "road_1_18_1", "road_1_19_1", "road_1_20_1", "road_1_21_1", "road_1_22_2"], "interval": 1.0, "startTime": 62, "endTime": 62},
{"vehicle": {"length": 5.0, "width": 2.0, "maxPosAcc": 2.0, "maxNegAcc": 4.5, "usualPosAcc": 2.0, "usualNegAcc": 4.5, "minGap": 2.5, "maxSpeed": 11.111, "headwayTime": 2}, "route": ["road_0_19_0", "road_1_19_1", "road_1_20_0", "road_2_20_3", "road_2_19_3", "road_2_18_3", "road_2_17_3", "road_2_16_3", "road_2_15_3", "road_2_14_3", "road_2_13_3", "road_2_12_3", "road_2_11_3", "road_2_10_3", "road_2_9_3", "road_2_8_3", "road_2_7_3", "road_2_6_3", "road_2_5_3", "road_2_4_3", "road_2_3_3", "road_2_2_3", "road_2_1_2", "road_1_1_3"], "interval": 1.0, "startTime": 62, "endTime": 62},
{"vehicle": {"length": 5.0, "width": 2.0, "maxPosAcc": 2.0, "maxNegAcc": 4.5, "usualPosAcc": 2.0, "usualNegAcc": 4.5, "minGap": 2.5, "maxSpeed": 11.111, "headwayTime": 2}, "route": ["road_0_21_0", "road_1_21_1", "road_1_22_0", "road_2_22_3", "road_2_21_3", "road_2_20_3", "road_2_19_3", "road_2_18_3", "road_2_17_3", "road_2_16_3", "road_2_15_3", "road_2_14_3", "road_2_13_3", "road_2_12_3", "road_2_11_3", "road_2_10_3", "road_2_9_3", "road_2_8_3", "road_2_7_3", "road_2_6_3", "road_2_5_3", "road_2_4_3", "road_2_3_3", "road_2_2_0", "road_3_2_0", "road_4_2_0", "road_5_2_3", "road_5_1_3"], "interval": 1.0, "startTime": 62, "endTime": 62},
{"vehicle": {"length": 5.0, "width": 2.0, "maxPosAcc": 2.0, "maxNegAcc": 4.5, "usualPosAcc": 2.0, "usualNegAcc": 4.5, "minGap": 2.5, "maxSpeed": 11.111, "headwayTime": 2}, "route": ["road_0_23_0", "road_1_23_1", "road_1_24_0", "road_2_24_0", "road_3_24_0", "road_4_24_0", "road_5_24_0", "road_6_24_0", "road_7_24_3", "road_7_23_3", "road_7_22_3", "road_7_21_3", "road_7_20_3", "road_7_19_0"], "interval": 1.0, "startTime": 62, "endTime": 62},
{"vehicle": {"length": 5.0, "width": 2.0, "maxPosAcc": 2.0, "maxNegAcc": 4.5, "usualPosAcc": 2.0, "usualNegAcc": 4.5, "minGap": 2.5, "maxSpeed": 11.111, "headwayTime": 2}, "route": ["road_2_0_1", "road_2_1_2", "road_1_1_1", "road_1_2_1", "road_1_3_1", "road_1_4_1", "road_1_5_2"], "interval": 1.0, "startTime": 62, "endTime": 62},
{"vehicle": {"length": 5.0, "width": 2.0, "maxPosAcc": 2.0, "maxNegAcc": 4.5, "usualPosAcc": 2.0, "usualNegAcc": 4.5, "minGap": 2.5, "maxSpeed": 11.111, "headwayTime": 2}, "route": ["road_2_29_3", "road_2_28_3", "road_2_27_3", "road_2_26_3", "road_2_25_3", "road_2_24_3", "road_2_23_3", "road_2_22_3", "road_2_21_3", "road_2_20_3", "road_2_19_3", "road_2_18_3", "road_2_17_3", "road_2_16_3", "road_2_15_3", "road_2_14_3", "road_2_13_3", "road_2_12_3", "road_2_11_3", "road_2_10_3", "road_2_9_3", "road_2_8_3", "road_2_7_3", "road_2_6_3", "road_2_5_3", "road_2_4_3", "road_2_3_3", "road_2_2_3", "road_2_1_2", "road_1_1_3"], "interval": 1.0, "startTime": 62, "endTime": 62},
{"vehicle": {"length": 5.0, "width": 2.0, "maxPosAcc": 2.0, "maxNegAcc": 4.5, "usualPosAcc": 2.0, "usualNegAcc": 4.5, "minGap": 2.5, "maxSpeed": 11.111, "headwayTime": 2}, "route": ["road_2_0_1", "road_2_1_2", "road_1_1_3"], "interval": 1.0, "startTime": 63, "endTime": 63},
{"vehicle": {"length": 5.0, "width": 2.0, "maxPosAcc": 2.0, "maxNegAcc": 4.5, "usualPosAcc": 2.0, "usualNegAcc": 4.5, "minGap": 2.5, "maxSpeed": 11.111, "headwayTime": 2}, "route": ["road_3_0_1", "road_3_1_2", "road_2_1_3"], "interval": 1.0, "startTime": 63, "endTime": 63},
{"vehicle": {"length": 5.0, "width": 2.0, "maxPosAcc": 2.0, "maxNegAcc": 4.5, "usualPosAcc": 2.0, "usualNegAcc": 4.5, "minGap": 2.5, "maxSpeed": 11.111, "headwayTime": 2}, "route": ["road_4_0_1", "road_4_1_2", "road_3_1_2", "road_2_1_2", "road_1_1_1", "road_1_2_1", "road_1_3_1", "road_1_4_1", "road_1_5_1", "road_1_6_1", "road_1_7_1", "road_1_8_1", "road_1_9_1", "road_1_10_1", "road_1_11_1", "road_1_12_1", "road_1_13_1", "road_1_14_1", "road_1_15_1", "road_1_16_1", "road_1_17_1", "road_1_18_1", "road_1_19_1", "road_1_20_1", "road_1_21_1", "road_1_22_1", "road_1_23_1", "road_1_24_1", "road_1_25_1", "road_1_26_1", "road_1_27_1", "road_1_28_1"], "interval": 1.0, "startTime": 63, "endTime": 63},
{"vehicle": {"length": 5.0, "width": 2.0, "maxPosAcc": 2.0, "maxNegAcc": 4.5, "usualPosAcc": 2.0, "usualNegAcc": 4.5, "minGap": 2.5, "maxSpeed": 11.111, "headwayTime": 2}, "route": ["road_5_29_3", "road_5_28_3", "road_5_27_3", "road_5_26_3", "road_5_25_2", "road_4_25_2", "road_3_25_2", "road_2_25_3", "road_2_24_3", "road_2_23_3", "road_2_22_3", "road_2_21_3", "road_2_20_3", "road_2_19_3", "road_2_18_3", "road_2_17_3", "road_2_16_3", "road_2_15_3", "road_2_14_3", "road_2_13_3", "road_2_12_3", "road_2_11_3", "road_2_10_3", "road_2_9_3", "road_2_8_3", "road_2_7_3", "road_2_6_3", "road_2_5_3", "road_2_4_3", "road_2_3_3", "road_2_2_3", "road_2_1_2", "road_1_1_3"], "interval": 1.0, "startTime": 63, "endTime": 63},
{"vehicle": {"length": 5.0, "width": 2.0, "maxPosAcc": 2.0, "maxNegAcc": 4.5, "usualPosAcc": 2.0, "usualNegAcc": 4.5, "minGap": 2.5, "maxSpeed": 11.111, "headwayTime": 2}, "route": ["road_4_29_3", "road_4_28_0", "road_5_28_3", "road_5_27_3", "road_5_26_3", "road_5_25_3", "road_5_24_3", "road_5_23_3", "road_5_22_3", "road_5_21_3", "road_5_20_3", "road_5_19_3", "road_5_18_3", "road_5_17_0", "road_6_17_0", "road_7_17_3", "road_7_16_3", "road_7_15_3", "road_7_14_3", "road_7_13_3", "road_7_12_3", "road_7_11_0"], "interval": 1.0, "startTime": 64, "endTime": 64},
{"vehicle": {"length": 5.0, "width": 2.0, "maxPosAcc": 2.0, "maxNegAcc": 4.5, "usualPosAcc": 2.0, "usualNegAcc": 4.5, "minGap": 2.5, "maxSpeed": 11.111, "headwayTime": 2}, "route": ["road_1_0_1", "road_1_1_1", "road_1_2_0", "road_2_2_0", "road_3_2_3", "road_3_1_3"], "interval": 1.0, "startTime": 65, "endTime": 65},
{"vehicle": {"length": 5.0, "width": 2.0, "maxPosAcc": 2.0, "maxNegAcc": 4.5, "usualPosAcc": 2.0, "usualNegAcc": 4.5, "minGap": 2.5, "maxSpeed": 11.111, "headwayTime": 2}, "route": ["road_0_13_0", "road_1_13_1", "road_1_14_0", "road_2_14_0", "road_3_14_0", "road_4_14_0", "road_5_14_0", "road_6_14_0", "road_7_14_3", "road_7_13_3", "road_7_12_3", "road_7_11_0"], "interval": 1.0, "startTime": 65, "endTime": 65},
{"vehicle": {"length": 5.0, "width": 2.0, "maxPosAcc": 2.0, "maxNegAcc": 4.5, "usualPosAcc": 2.0, "usualNegAcc": 4.5, "minGap": 2.5, "maxSpeed": 11.111, "headwayTime": 2}, "route": ["road_8_9_2", "road_7_9_1", "road_7_10_1", "road_7_11_1", "road_7_12_1", "road_7_13_1", "road_7_14_1", "road_7_15_1", "road_7_16_1", "road_7_17_1", "road_7_18_1", "road_7_19_1", "road_7_20_1", "road_7_21_1", "road_7_22_1", "road_7_23_1", "road_7_24_1", "road_7_25_1", "road_7_26_1", "road_7_27_1", "road_7_28_1"], "interval": 1.0, "startTime": 66, "endTime": 66},
{"vehicle": {"length": 5.0, "width": 2.0, "maxPosAcc": 2.0, "maxNegAcc": 4.5, "usualPosAcc": 2.0, "usualNegAcc": 4.5, "minGap": 2.5, "maxSpeed": 11.111, "headwayTime": 2}, "route": ["road_1_0_1", "road_1_1_1", "road_1_2_1", "road_1_3_1", "road_1_4_1", "road_1_5_1", "road_1_6_1", "road_1_7_1", "road_1_8_1", "road_1_9_1", "road_1_10_1", "road_1_11_2"], "interval": 1.0, "startTime": 66, "endTime": 66},
{"vehicle": {"length": 5.0, "width": 2.0, "maxPosAcc": 2.0, "maxNegAcc": 4.5, "usualPosAcc": 2.0, "usualNegAcc": 4.5, "minGap": 2.5, "maxSpeed": 11.111, "headwayTime": 2}, "route": ["road_5_0_1", "road_5_1_2", "road_4_1_2", "road_3_1_2", "road_2_1_2", "road_1_1_1", "road_1_2_1", "road_1_3_1", "road_1_4_1", "road_1_5_1", "road_1_6_2"], "interval": 1.0, "startTime": 66, "endTime": 66},
{"vehicle": {"length": 5.0, "width": 2.0, "maxPosAcc": 2.0, "maxNegAcc": 4.5, "usualPosAcc": 2.0, "usualNegAcc": 4.5, "minGap": 2.5, "maxSpeed": 11.111, "headwayTime": 2}, "route": ["road_0_18_0", "road_1_18_0", "road_2_18_3", "road_2_17_3", "road_2_16_3", "road_2_15_3", "road_2_14_3", "road_2_13_3", "road_2_12_3", "road_2_11_3", "road_2_10_2", "road_1_10_2"], "interval": 1.0, "startTime": 66, "endTime": 66},
{"vehicle": {"length": 5.0, "width": 2.0, "maxPosAcc": 2.0, "maxNegAcc": 4.5, "usualPosAcc": 2.0, "usualNegAcc": 4.5, "minGap": 2.5, "maxSpeed": 11.111, "headwayTime": 2}, "route": ["road_0_9_0", "road_1_9_1", "road_1_10_1", "road_1_11_1", "road_1_12_1", "road_1_13_1", "road_1_14_1", "road_1_15_1", "road_1_16_1", "road_1_17_1", "road_1_18_1", "road_1_19_1", "road_1_20_1", "road_1_21_1", "road_1_22_2"], "interval": 1.0, "startTime": 67, "endTime": 67},
{"vehicle": {"length": 5.0, "width": 2.0, "maxPosAcc": 2.0, "maxNegAcc": 4.5, "usualPosAcc": 2.0, "usualNegAcc": 4.5, "minGap": 2.5, "maxSpeed": 11.111, "headwayTime": 2}, "route": ["road_4_29_3", "road_4_28_0", "road_5_28_3", "road_5_27_3", "road_5_26_3", "road_5_25_3", "road_5_24_3", "road_5_23_3", "road_5_22_3", "road_5_21_3", "road_5_20_3", "road_5_19_3", "road_5_18_3", "road_5_17_3", "road_5_16_3", "road_5_15_3", "road_5_14_3", "road_5_13_3", "road_5_12_3", "road_5_11_3", "road_5_10_3", "road_5_9_3", "road_5_8_3", "road_5_7_3", "road_5_6_3", "road_5_5_3", "road_5_4_3", "road_5_3_3", "road_5_2_3", "road_5_1_3"], "interval": 1.0, "startTime": 68, "endTime": 68},
{"vehicle": {"length": 5.0, "width": 2.0, "maxPosAcc": 2.0, "maxNegAcc": 4.5, "usualPosAcc": 2.0, "usualNegAcc": 4.5, "minGap": 2.5, "maxSpeed": 11.111, "headwayTime": 2}, "route": ["road_0_22_0", "road_1_22_0", "road_2_22_3", "road_2_21_3", "road_2_20_3", "road_2_19_3", "road_2_18_3", "road_2_17_3", "road_2_16_3", "road_2_15_3", "road_2_14_3", "road_2_13_3", "road_2_12_3", "road_2_11_3", "road_2_10_3", "road_2_9_3", "road_2_8_3", "road_2_7_3", "road_2_6_3", "road_2_5_3", "road_2_4_2", "road_1_4_2"], "interval": 1.0, "startTime": 69, "endTime": 69},
{"vehicle": {"length": 5.0, "width": 2.0, "maxPosAcc": 2.0, "maxNegAcc": 4.5, "usualPosAcc": 2.0, "usualNegAcc": 4.5, "minGap": 2.5, "maxSpeed": 11.111, "headwayTime": 2}, "route": ["road_1_0_1", "road_1_1_1", "road_1_2_0", "road_2_2_3", "road_2_1_3"], "interval": 1.0, "startTime": 70, "endTime": 70},
{"vehicle": {"length": 5.0, "width": 2.0, "maxPosAcc": 2.0, "maxNegAcc": 4.5, "usualPosAcc": 2.0, "usualNegAcc": 4.5, "minGap": 2.5, "maxSpeed": 11.111, "headwayTime": 2}, "route": ["road_2_0_1", "road_2_1_2", "road_1_1_1", "road_1_2_1", "road_1_3_1", "road_1_4_1", "road_1_5_1", "road_1_6_1", "road_1_7_1", "road_1_8_1", "road_1_9_1", "road_1_10_1", "road_1_11_1", "road_1_12_1", "road_1_13_1", "road_1_14_1", "road_1_15_1", "road_1_16_1", "road_1_17_1", "road_1_18_1", "road_1_19_1", "road_1_20_1", "road_1_21_1", "road_1_22_1", "road_1_23_1", "road_1_24_2"], "interval": 1.0, "startTime": 71, "endTime": 71},
{"vehicle": {"length": 5.0, "width": 2.0, "maxPosAcc": 2.0, "maxNegAcc": 4.5, "usualPosAcc": 2.0, "usualNegAcc": 4.5, "minGap": 2.5, "maxSpeed": 11.111, "headwayTime": 2}, "route": ["road_1_0_1", "road_1_1_1", "road_1_2_0", "road_2_2_0", "road_3_2_0", "road_4_2_0", "road_5_2_3", "road_5_1_2", "road_4_1_3"], "interval": 1.0, "startTime": 72, "endTime": 72},
{"vehicle": {"length": 5.0, "width": 2.0, "maxPosAcc": 2.0, "maxNegAcc": 4.5, "usualPosAcc": 2.0, "usualNegAcc": 4.5, "minGap": 2.5, "maxSpeed": 11.111, "headwayTime": 2}, "route": ["road_0_5_0", "road_1_5_1", "road_1_6_0", "road_2_6_3", "road_2_5_3", "road_2_4_3", "road_2_3_3", "road_2_2_3", "road_2_1_2", "road_1_1_3"], "interval": 1.0, "startTime": 72, "endTime": 72},
{"vehicle": {"length": 5.0, "width": 2.0, "maxPosAcc": 2.0, "maxNegAcc": 4.5, "usualPosAcc": 2.0, "usualNegAcc": 4.5, "minGap": 2.5, "maxSpeed": 11.111, "headwayTime": 2}, "route": ["road_0_21_0", "road_1_21_1", "road_1_22_1", "road_1_23_1", "road_1_24_1", "road_1_25_1", "road_1_26_1", "road_1_27_1", "road_1_28_1"], "interval": 1.0, "startTime": 73, "endTime": 73},
{"vehicle": {"length": 5.0, "width": 2.0, "maxPosAcc": 2.0, "maxNegAcc": 4.5, "usualPosAcc": 2.0, "usualNegAcc": 4.5, "minGap": 2.5, "maxSpeed": 11.111, "headwayTime": 2}, "route": ["road_4_0_1", "road_4_1_1", "road_4_2_0", "road_5_2_0", "road_6_2_0", "road_7_2_1", "road_7_3_1", "road_7_4_1", "road_7_5_1", "road_7_6_1", "road_7_7_1", "road_7_8_1", "road_7_9_1", "road_7_10_1", "road_7_11_1", "road_7_12_1", "road_7_13_1", "road_7_14_1", "road_7_15_1", "road_7_16_1", "road_7_17_1", "road_7_18_1", "road_7_19_1", "road_7_20_1", "road_7_21_1", "road_7_22_1", "road_7_23_1", "road_7_24_0"], "interval": 1.0, "startTime": 74, "endTime": 74},
{"vehicle": {"length": 5.0, "width": 2.0, "maxPosAcc": 2.0, "maxNegAcc": 4.5, "usualPosAcc": 2.0, "usualNegAcc": 4.5, "minGap": 2.5, "maxSpeed": 11.111, "headwayTime": 2}, "route": ["road_1_0_1", "road_1_1_1", "road_1_2_1", "road_1_3_1", "road_1_4_1", "road_1_5_1", "road_1_6_1", "road_1_7_1", "road_1_8_1", "road_1_9_1", "road_1_10_2"], "interval": 1.0, "startTime": 75, "endTime": 75},
{"vehicle": {"length": 5.0, "width": 2.0, "maxPosAcc": 2.0, "maxNegAcc": 4.5, "usualPosAcc": 2.0, "usualNegAcc": 4.5, "minGap": 2.5, "maxSpeed": 11.111, "headwayTime": 2}, "route": ["road_5_0_1", "road_5_1_2", "road_4_1_2", "road_3_1_2", "road_2_1_2", "road_1_1_1", "road_1_2_2"], "interval": 1.0, "startTime": 76, "endTime": 76},
{"vehicle": {"length": 5.0, "width": 2.0, "maxPosAcc": 2.0, "maxNegAcc": 4.5, "usualPosAcc": 2.0, "usualNegAcc": 4.5, "minGap": 2.5, "maxSpeed": 11.111, "headwayTime": 2}, "route": ["road_1_0_1", "road_1_1_1", "road_1_2_1", "road_1_3_1", "road_1_4_1", "road_1_5_1", "road_1_6_1", "road_1_7_1", "road_1_8_1", "road_1_9_1", "road_1_10_1", "road_1_11_1", "road_1_12_1", "road_1_13_1", "road_1_14_1", "road_1_15_1", "road_1_16_1", "road_1_17_1", "road_1_18_1", "road_1_19_1", "road_1_20_1", "road_1_21_1", "road_1_22_1", "road_1_23_1", "road_1_24_1", "road_1_25_1", "road_1_26_1", "road_1_27_1", "road_1_28_0", "road_2_28_1"], "interval": 1.0, "startTime": 77, "endTime": 77},
{"vehicle": {"length": 5.0, "width": 2.0, "maxPosAcc": 2.0, "maxNegAcc": 4.5, "usualPosAcc": 2.0, "usualNegAcc": 4.5, "minGap": 2.5, "maxSpeed": 11.111, "headwayTime": 2}, "route": ["road_2_0_1", "road_2_1_1", "road_2_2_0", "road_3_2_0", "road_4_2_0", "road_5_2_0", "road_6_2_0", "road_7_2_1", "road_7_3_1", "road_7_4_1", "road_7_5_1", "road_7_6_1", "road_7_7_1", "road_7_8_1", "road_7_9_1", "road_7_10_1", "road_7_11_1", "road_7_12_1", "road_7_13_1", "road_7_14_1", "road_7_15_1", "road_7_16_1", "road_7_17_1", "road_7_18_0"], "interval": 1.0, "startTime": 77, "endTime": 77},
{"vehicle": {"length": 5.0, "width": 2.0, "maxPosAcc": 2.0, "maxNegAcc": 4.5, "usualPosAcc": 2.0, "usualNegAcc": 4.5, "minGap": 2.5, "maxSpeed": 11.111, "headwayTime": 2}, "route": ["road_8_24_2", "road_7_24_3", "road_7_23_3", "road_7_22_3", "road_7_21_3", "road_7_20_0"], "interval": 1.0, "startTime": 79, "endTime": 79},
{"vehicle": {"length": 5.0, "width": 2.0, "maxPosAcc": 2.0, "maxNegAcc": 4.5, "usualPosAcc": 2.0, "usualNegAcc": 4.5, "minGap": 2.5, "maxSpeed": 11.111, "headwayTime": 2}, "route": ["road_0_6_0", "road_1_6_0", "road_2_6_0", "road_3_6_0", "road_4_6_0", "road_5_6_0", "road_6_6_0", "road_7_6_1", "road_7_7_1", "road_7_8_1", "road_7_9_1", "road_7_10_1", "road_7_11_0"], "interval": 1.0, "startTime": 79, "endTime": 79},
{"vehicle": {"length": 5.0, "width": 2.0, "maxPosAcc": 2.0, "maxNegAcc": 4.5, "usualPosAcc": 2.0, "usualNegAcc": 4.5, "minGap": 2.5, "maxSpeed": 11.111, "headwayTime": 2}, "route": ["road_0_18_0", "road_1_18_0", "road_2_18_3", "road_2_17_3", "road_2_16_3", "road_2_15_3", "road_2_14_3", "road_2_13_3", "road_2_12_3", "road_2_11_2", "road_1_11_2"], "interval": 1.0, "startTime": 79, "endTime": 79},
{"vehicle": {"length": 5.0, "width": 2.0, "maxPosAcc": 2.0, "maxNegAcc": 4.5, "usualPosAcc": 2.0, "usualNegAcc": 4.5, "minGap": 2.5, "maxSpeed": 11.111, "headwayTime": 2}, "route": ["road_1_0_1", "road_1_1_1", "road_1_2_1", "road_1_3_2"], "interval": 1.0, "startTime": 80, "endTime": 80},
{"vehicle": {"length": 5.0, "width": 2.0, "maxPosAcc": 2.0, "maxNegAcc": 4.5, "usualPosAcc": 2.0, "usualNegAcc": 4.5, "minGap": 2.5, "maxSpeed": 11.111, "headwayTime": 2}, "route": ["road_2_29_3", "road_2_28_0", "road_3_28_3", "road_3_27_2", "road_2_27_3", "road_2_26_3", "road_2_25_3", "road_2_24_3", "road_2_23_3", "road_2_22_3", "road_2_21_3", "road_2_20_3", "road_2_19_3", "road_2_18_3", "road_2_17_3", "road_2_16_3", "road_2_15_3", "road_2_14_3", "road_2_13_3", "road_2_12_3", "road_2_11_3", "road_2_10_2", "road_1_10_2"], "interval": 1.0, "startTime": 80, "endTime": 80},
{"vehicle": {"length": 5.0, "width": 2.0, "maxPosAcc": 2.0, "maxNegAcc": 4.5, "usualPosAcc": 2.0, "usualNegAcc": 4.5, "minGap": 2.5, "maxSpeed": 11.111, "headwayTime": 2}, "route": ["road_8_5_2", "road_7_5_2", "road_6_5_2", "road_5_5_2", "road_4_5_2", "road_3_5_2", "road_2_5_2", "road_1_5_1", "road_1_6_1", "road_1_7_1", "road_1_8_1", "road_1_9_1", "road_1_10_2"], "interval": 1.0, "startTime": 81, "endTime": 81},
{"vehicle": {"length": 5.0, "width": 2.0, "maxPosAcc": 2.0, "maxNegAcc": 4.5, "usualPosAcc": 2.0, "usualNegAcc": 4.5, "minGap": 2.5, "maxSpeed": 11.111, "headwayTime": 2}, "route": ["road_8_10_2", "road_7_10_3", "road_7_9_0"], "interval": 1.0, "startTime": 81, "endTime": 81},
{"vehicle": {"length": 5.0, "width": 2.0, "maxPosAcc": 2.0, "maxNegAcc": 4.5, "usualPosAcc": 2.0, "usualNegAcc": 4.5, "minGap": 2.5, "maxSpeed": 11.111, "headwayTime": 2}, "route": ["road_4_0_1", "road_4_1_2", "road_3_1_2", "road_2_1_2", "road_1_1_1", "road_1_2_1", "road_1_3_1", "road_1_4_1", "road_1_5_2"], "interval": 1.0, "startTime": 82, "endTime": 82},
{"vehicle": {"length": 5.0, "width": 2.0, "maxPosAcc": 2.0, "maxNegAcc": 4.5, "usualPosAcc": 2.0, "usualNegAcc": 4.5, "minGap": 2.5, "maxSpeed": 11.111, "headwayTime": 2}, "route": ["road_3_0_1", "road_3_1_2", "road_2_1_2", "road_1_1_3"], "interval": 1.0, "startTime": 83, "endTime": 83},
{"vehicle": {"length": 5.0, "width": 2.0, "maxPosAcc": 2.0, "maxNegAcc": 4.5, "usualPosAcc": 2.0, "usualNegAcc": 4.5, "minGap": 2.5, "maxSpeed": 11.111, "headwayTime": 2}, "route": ["road_0_3_0", "road_1_3_0", "road_2_3_3", "road_2_2_0", "road_3_2_0", "road_4_2_0", "road_5_2_3", "road_5_1_3"], "interval": 1.0, "startTime": 83, "endTime": 83},
{"vehicle": {"length": 5.0, "width": 2.0, "maxPosAcc": 2.0, "maxNegAcc": 4.5, "usualPosAcc": 2.0, "usualNegAcc": 4.5, "minGap": 2.5, "maxSpeed": 11.111, "headwayTime": 2}, "route": ["road_8_12_2", "road_7_12_3", "road_7_11_2", "road_6_11_2", "road_5_11_2", "road_4_11_2", "road_3_11_2", "road_2_11_3", "road_2_10_3", "road_2_9_3", "road_2_8_3", "road_2_7_3", "road_2_6_3", "road_2_5_2", "road_1_5_2"], "interval": 1.0, "startTime": 84, "endTime": 84},
{"vehicle": {"length": 5.0, "width": 2.0, "maxPosAcc": 2.0, "maxNegAcc": 4.5, "usualPosAcc": 2.0, "usualNegAcc": 4.5, "minGap": 2.5, "maxSpeed": 11.111, "headwayTime": 2}, "route": ["road_8_15_2", "road_7_15_3", "road_7_14_3", "road_7_13_3", "road_7_12_3", "road_7_11_3", "road_7_10_2", "road_6_10_2", "road_5_10_3", "road_5_9_3", "road_5_8_3", "road_5_7_3", "road_5_6_3", "road_5_5_3", "road_5_4_3", "road_5_3_3", "road_5_2_3", "road_5_1_3"], "interval": 1.0, "startTime": 84, "endTime": 84},
{"vehicle": {"length": 5.0, "width": 2.0, "maxPosAcc": 2.0, "maxNegAcc": 4.5, "usualPosAcc": 2.0, "usualNegAcc": 4.5, "minGap": 2.5, "maxSpeed": 11.111, "headwayTime": 2}, "route": ["road_1_0_1", "road_1_1_1", "road_1_2_0", "road_2_2_0", "road_3_2_3", "road_3_1_3"], "interval": 1.0, "startTime": 84, "endTime": 84},
{"vehicle": {"length": 5.0, "width": 2.0, "maxPosAcc": 2.0, "maxNegAcc": 4.5, "usualPosAcc": 2.0, "usualNegAcc": 4.5, "minGap": 2.5, "maxSpeed": 11.111, "headwayTime": 2}, "route": ["road_0_12_0", "road_1_12_0", "road_2_12_1", "road_2_13_1", "road_2_14_1", "road_2_15_1", "road_2_16_1", "road_2_17_1", "road_2_18_1", "road_2_19_1", "road_2_20_1", "road_2_21_1", "road_2_22_1", "road_2_23_1", "road_2_24_1", "road_2_25_1", "road_2_26_0", "road_3_26_0", "road_4_26_1", "road_4_27_1", "road_4_28_0", "road_5_28_1"], "interval": 1.0, "startTime": 84, "endTime": 84},
{"vehicle": {"length": 5.0, "width": 2.0, "maxPosAcc": 2.0, "maxNegAcc": 4.5, "usualPosAcc": 2.0, "usualNegAcc": 4.5, "minGap": 2.5, "maxSpeed": 11.111, "headwayTime": 2}, "route": ["road_1_29_3", "road_1_28_0", "road_2_28_3", "road_2_27_3", "road_2_26_3", "road_2_25_3", "road_2_24_3", "road_2_23_3", "road_2_22_3", "road_2_21_3", "road_2_20_3", "road_2_19_3", "road_2_18_3", "road_2_17_3", "road_2_16_3", "road_2_15_3", "road_2_14_3", "road_2_13_3", "road_2_12_3", "road_2_11_3", "road_2_10_3", "road_2_9_3", "road_2_8_3", "road_2_7_2", "road_1_7_2"], "interval": 1.0, "startTime": 84, "endTime": 84},
{"vehicle": {"length": 5.0, "width": 2.0, "maxPosAcc": 2.0, "maxNegAcc": 4.5, "usualPosAcc": 2.0, "usualNegAcc": 4.5, "minGap": 2.5, "maxSpeed": 11.111, "headwayTime": 2}, "route": ["road_1_0_1", "road_1_1_1", "road_1_2_1", "road_1_3_1", "road_1_4_1", "road_1_5_1", "road_1_6_1", "road_1_7_1", "road_1_8_1", "road_1_9_1", "road_1_10_2"], "interval": 1.0, "startTime": 87, "endTime": 87},
{"vehicle": {"length": 5.0, "width": 2.0, "maxPosAcc": 2.0, "maxNegAcc": 4.5, "usualPosAcc": 2.0, "usualNegAcc": 4.5, "minGap": 2.5, "maxSpeed": 11.111, "headwayTime": 2}, "route": ["road_1_29_3", "road_1_28_0", "road_2_28_0", "road_3_28_0", "road_4_28_1"], "interval": 1.0, "startTime": 87, "endTime": 87},
{"vehicle": {"length": 5.0, "width": 2.0, "maxPosAcc": 2.0, "maxNegAcc": 4.5, "usualPosAcc": 2.0, "usualNegAcc": 4.5, "minGap": 2.5, "maxSpeed": 11.111, "headwayTime": 2}, "route": ["road_0_25_0", "road_1_25_1", "road_1_26_1", "road_1_27_1", "road_1_28_0", "road_2_28_1"], "interval": 1.0, "startTime": 87, "endTime": 87},
{"vehicle": {"length": 5.0, "width": 2.0, "maxPosAcc": 2.0, "maxNegAcc": 4.5, "usualPosAcc": 2.0, "usualNegAcc": 4.5, "minGap": 2.5, "maxSpeed": 11.111, "headwayTime": 2}, "route": ["road_8_13_2", "road_7_13_2", "road_6_13_2", "road_5_13_3", "road_5_12_3", "road_5_11_3", "road_5_10_2", "road_4_10_2", "road_3_10_3", "road_3_9_3", "road_3_8_3", "road_3_7_3", "road_3_6_3", "road_3_5_3", "road_3_4_3", "road_3_3_3", "road_3_2_3", "road_3_1_2", "road_2_1_2", "road_1_1_1", "road_1_2_2"], "interval": 1.0, "startTime": 89, "endTime": 89},
{"vehicle": {"length": 5.0, "width": 2.0, "maxPosAcc": 2.0, "maxNegAcc": 4.5, "usualPosAcc": 2.0, "usualNegAcc": 4.5, "minGap": 2.5, "maxSpeed": 11.111, "headwayTime": 2}, "route": ["road_0_22_0", "road_1_22_0", "road_2_22_3", "road_2_21_3", "road_2_20_3", "road_2_19_2", "road_1_19_2"], "interval": 1.0, "startTime": 89, "endTime": 89},
{"vehicle": {"length": 5.0, "width": 2.0, "maxPosAcc": 2.0, "maxNegAcc": 4.5, "usualPosAcc": 2.0, "usualNegAcc": 4.5, "minGap": 2.5, "maxSpeed": 11.111, "headwayTime": 2}, "route": ["road_0_12_0", "road_1_12_0", "road_2_12_0", "road_3_12_0", "road_4_12_0", "road_5_12_0", "road_6_12_0", "road_7_12_3", "road_7_11_3", "road_7_10_3", "road_7_9_0"], "interval": 1.0, "startTime": 89, "endTime": 89},
{"vehicle": {"length": 5.0, "width": 2.0, "maxPosAcc": 2.0, "maxNegAcc": 4.5, "usualPosAcc": 2.0, "usualNegAcc": 4.5, "minGap": 2.5, "maxSpeed": 11.111, "headwayTime": 2}, "route": ["road_8_19_2", "road_7_19_2", "road_6_19_2", "road_5_19_2", "road_4_19_2", "road_3_19_2", "road_2_19_2", "road_1_19_1", "road_1_20_1", "road_1_21_1", "road_1_22_1", "road_1_23_1", "road_1_24_1", "road_1_25_1", "road_1_26_1", "road_1_27_1", "road_1_28_0", "road_2_28_1"], "interval": 1.0, "startTime": 90, "endTime": 90},
{"vehicle": {"length": 5.0, "width": 2.0, "maxPosAcc": 2.0, "maxNegAcc": 4.5, "usualPosAcc": 2.0, "usualNegAcc": 4.5, "minGap": 2.5, "maxSpeed": 11.111, "headwayTime": 2}, "route": ["road_1_0_1", "road_1_1_1", "road_1_2_1", "road_1_3_1", "road_1_4_1", "road_1_5_1", "road_1_6_1", "road_1_7_1", "road_1_8_1", "road_1_9_1", "road_1_10_1", "road_1_11_1", "road_1_12_1", "road_1_13_1", "road_1_14_1", "road_1_15_1", "road_1_16_2"], "interval": 1.0, "startTime": 90, "endTime": 90},
{"vehicle": {"length": 5.0, "width": 2.0, "maxPosAcc": 2.0, "maxNegAcc": 4.5, "usualPosAcc": 2.0, "usualNegAcc": 4.5, "minGap": 2.5, "maxSpeed": 11.111, "headwayTime": 2}, "route": ["road_8_15_2", "road_7_15_1", "road_7_16_1", "road_7_17_1", "road_7_18_1", "road_7_19_1", "road_7_20_1", "road_7_21_1", "road_7_22_0"], "interval": 1.0, "startTime": 91, "endTime": 91},
{"vehicle": {"length": 5.0, "width": 2.0, "maxPosAcc": 2.0, "maxNegAcc": 4.5, "usualPosAcc": 2.0, "usualNegAcc": 4.5, "minGap": 2.5, "maxSpeed": 11.111, "headwayTime": 2}, "route": ["road_0_3_0", "road_1_3_1", "road_1_4_1", "road_1_5_1", "road_1_6_1", "road_1_7_2"], "interval": 1.0, "startTime": 91, "endTime": 91},
{"vehicle": {"length": 5.0, "width": 2.0, "maxPosAcc": 2.0, "maxNegAcc": 4.5, "usualPosAcc": 2.0, "usualNegAcc": 4.5, "minGap": 2.5, "maxSpeed": 11.111, "headwayTime": 2}, "route": ["road_8_16_2", "road_7_16_1", "road_7_17_2", "road_6_17_2", "road_5_17_2", "road_4_17_2", "road_3_17_2", "road_2_17_2", "road_1_17_1", "road_1_18_1", "road_1_19_1", "road_1_20_1", "road_1_21_1", "road_1_22_1", "road_1_23_1", "road_1_24_1", "road_1_25_1", "road_1_26_1", "road_1_27_1", "road_1_28_1"], "interval": 1.0, "startTime": 92, "endTime": 92},
{"vehicle": {"length": 5.0, "width": 2.0, "maxPosAcc": 2.0, "maxNegAcc": 4.5, "usualPosAcc": 2.0, "usualNegAcc": 4.5, "minGap": 2.5, "maxSpeed": 11.111, "headwayTime": 2}, "route": ["road_1_0_1", "road_1_1_1", "road_1_2_1", "road_1_3_1", "road_1_4_1", "road_1_5_1", "road_1_6_2"], "interval": 1.0, "startTime": 93, "endTime": 93},
{"vehicle": {"length": 5.0, "width": 2.0, "maxPosAcc": 2.0, "maxNegAcc": 4.5, "usualPosAcc": 2.0, "usualNegAcc": 4.5, "minGap": 2.5, "maxSpeed": 11.111, "headwayTime": 2}, "route": ["road_0_20_0", "road_1_20_0", "road_2_20_1", "road_2_21_1", "road_2_22_1", "road_2_23_1", "road_2_24_1", "road_2_25_1", "road_2_26_0", "road_3_26_0", "road_4_26_1", "road_4_27_1", "road_4_28_1"], "interval": 1.0, "startTime": 94, "endTime": 94},
{"vehicle": {"length": 5.0, "width": 2.0, "maxPosAcc": 2.0, "maxNegAcc": 4.5, "usualPosAcc": 2.0, "usualNegAcc": 4.5, "minGap": 2.5, "maxSpeed": 11.111, "headwayTime": 2}, "route": ["road_0_14_0", "road_1_14_1", "road_1_15_1", "road_1_16_1", "road_1_17_1", "road_1_18_1", "road_1_19_1", "road_1_20_1", "road_1_21_1", "road_1_22_1", "road_1_23_1", "road_1_24_1", "road_1_25_1", "road_1_26_1", "road_1_27_1", "road_1_28_0", "road_2_28_1"], "interval": 1.0, "startTime": 95, "endTime": 95},
{"vehicle": {"length": 5.0, "width": 2.0, "maxPosAcc": 2.0, "maxNegAcc": 4.5, "usualPosAcc": 2.0, "usualNegAcc": 4.5, "minGap": 2.5, "maxSpeed": 11.111, "headwayTime": 2}, "route": ["road_0_19_0", "road_1_19_1", "road_1_20_0", "road_2_20_3", "road_2_19_3", "road_2_18_3", "road_2_17_3", "road_2_16_3", "road_2_15_3", "road_2_14_3", "road_2_13_3", "road_2_12_3", "road_2_11_3", "road_2_10_3", "road_2_9_3", "road_2_8_3", "road_2_7_3", "road_2_6_3", "road_2_5_3", "road_2_4_3", "road_2_3_3", "road_2_2_3", "road_2_1_3"], "interval": 1.0, "startTime": 95, "endTime": 95},
{"vehicle": {"length": 5.0, "width": 2.0, "maxPosAcc": 2.0, "maxNegAcc": 4.5, "usualPosAcc": 2.0, "usualNegAcc": 4.5, "minGap": 2.5, "maxSpeed": 11.111, "headwayTime": 2}, "route": ["road_6_0_1", "road_6_1_1", "road_6_2_0", "road_7_2_1", "road_7_3_1", "road_7_4_1", "road_7_5_1", "road_7_6_0"], "interval": 1.0, "startTime": 97, "endTime": 97},
{"vehicle": {"length": 5.0, "width": 2.0, "maxPosAcc": 2.0, "maxNegAcc": 4.5, "usualPosAcc": 2.0, "usualNegAcc": 4.5, "minGap": 2.5, "maxSpeed": 11.111, "headwayTime": 2}, "route": ["road_8_16_2", "road_7_16_3", "road_7_15_2", "road_6_15_2", "road_5_15_2", "road_4_15_2", "road_3_15_2", "road_2_15_3", "road_2_14_3", "road_2_13_3", "road_2_12_3", "road_2_11_3", "road_2_10_2", "road_1_10_2"], "interval": 1.0, "startTime": 98, "endTime": 98},
{"vehicle": {"length": 5.0, "width": 2.0, "maxPosAcc": 2.0, "maxNegAcc": 4.5, "usualPosAcc": 2.0, "usualNegAcc": 4.5, "minGap": 2.5, "maxSpeed": 11.111, "headwayTime": 2}, "route": ["road_0_25_0", "road_1_25_1", "road_1_26_0", "road_2_26_0", "road_3_26_0", "road_4_26_0", "road_5_26_0", "road_6_26_0", "road_7_26_3", "road_7_25_0"], "interval": 1.0, "startTime": 98, "endTime": 98},
{"vehicle": {"length": 5.0, "width": 2.0, "maxPosAcc": 2.0, "maxNegAcc": 4.5, "usualPosAcc": 2.0, "usualNegAcc": 4.5, "minGap": 2.5, "maxSpeed": 11.111, "headwayTime": 2}, "route": ["road_1_29_3", "road_1_28_0", "road_2_28_1"], "interval": 1.0, "startTime": 99, "endTime": 99},
{"vehicle": {"length": 5.0, "width": 2.0, "maxPosAcc": 2.0, "maxNegAcc": 4.5, "usualPosAcc": 2.0, "usualNegAcc": 4.5, "minGap": 2.5, "maxSpeed": 11.111, "headwayTime": 2}, "route": ["road_1_0_1", "road_1_1_1", "road_1_2_1", "road_1_3_1", "road_1_4_1", "road_1_5_1", "road_1_6_1", "road_1_7_1", "road_1_8_2"], "interval": 1.0, "startTime": 100, "endTime": 100},
{"vehicle": {"length": 5.0, "width": 2.0, "maxPosAcc": 2.0, "maxNegAcc": 4.5, "usualPosAcc": 2.0, "usualNegAcc": 4.5, "minGap": 2.5, "maxSpeed": 11.111, "headwayTime": 2}, "route": ["road_0_14_0", "road_1_14_0", "road_2_14_0", "road_3_14_0", "road_4_14_0", "road_5_14_0", "road_6_14_0", "road_7_14_1", "road_7_15_1", "road_7_16_1", "road_7_17_1", "road_7_18_1", "road_7_19_1", "road_7_20_1", "road_7_21_1", "road_7_22_1", "road_7_23_1", "road_7_24_1", "road_7_25_0"], "interval": 1.0, "startTime": 100, "endTime": 100},
{"vehicle": {"length": 5.0, "width": 2.0, "maxPosAcc": 2.0, "maxNegAcc": 4.5, "usualPosAcc": 2.0, "usualNegAcc": 4.5, "minGap": 2.5, "maxSpeed": 11.111, "headwayTime": 2}, "route": ["road_3_0_1", "road_3_1_2", "road_2_1_2", "road_1_1_3"], "interval": 1.0, "startTime": 101, "endTime": 101},
{"vehicle": {"length": 5.0, "width": 2.0, "maxPosAcc": 2.0, "maxNegAcc": 4.5, "usualPosAcc": 2.0, "usualNegAcc": 4.5, "minGap": 2.5, "maxSpeed": 11.111, "headwayTime": 2}, "route": ["road_8_19_2", "road_7_19_3", "road_7_18_3", "road_7_17_3", "road_7_16_3", "road_7_15_3", "road_7_14_3", "road_7_13_3", "road_7_12_3", "road_7_11_3", "road_7_10_2", "road_6_10_2", "road_5_10_3", "road_5_9_3", "road_5_8_3", "road_5_7_3", "road_5_6_3", "road_5_5_3", "road_5_4_3", "road_5_3_3", "road_5_2_3", "road_5_1_3"], "interval": 1.0, "startTime": 103, "endTime": 103},
{"vehicle": {"length": 5.0, "width": 2.0, "maxPosAcc": 2.0, "maxNegAcc": 4.5, "usualPosAcc": 2.0, "usualNegAcc": 4.5, "minGap": 2.5, "maxSpeed": 11.111, "headwayTime": 2}, "route": ["road_0_14_0", "road_1_14_0", "road_2_14_0", "road_3_14_0", "road_4_14_0", "road_5_14_0", "road_6_14_0", "road_7_14_3", "road_7_13_3", "road_7_12_3", "road_7_11_0"], "interval": 1.0, "startTime": 104, "endTime": 104},
{"vehicle": {"length": 5.0, "width": 2.0, "maxPosAcc": 2.0, "maxNegAcc": 4.5, "usualPosAcc": 2.0, "usualNegAcc": 4.5, "minGap": 2.5, "maxSpeed": 11.111, "headwayTime": 2}, "route": ["road_0_23_0", "road_1_23_1", "road_1_24_0", "road_2_24_0", "road_3_24_0", "road_4_24_1", "road_4_25_1", "road_4_26_0", "road_5_26_0", "road_6_26_0", "road_7_26_1", "road_7_27_0"], "interval": 1.0, "startTime": 104, "endTime": 104},
{"vehicle": {"length": 5.0, "width": 2.0, "maxPosAcc": 2.0, "maxNegAcc": 4.5, "usualPosAcc": 2.0, "usualNegAcc": 4.5, "minGap": 2.5, "maxSpeed": 11.111, "headwayTime": 2}, "route": ["road_8_22_2", "road_7_22_3", "road_7_21_2", "road_6_21_2", "road_5_21_2", "road_4_21_2", "road_3_21_2", "road_2_21_3", "road_2_20_3", "road_2_19_3", "road_2_18_3", "road_2_17_3", "road_2_16_3", "road_2_15_3", "road_2_14_3", "road_2_13_3", "road_2_12_3", "road_2_11_3", "road_2_10_2", "road_1_10_2"], "interval": 1.0, "startTime": 105, "endTime": 105},
{"vehicle": {"length": 5.0, "width": 2.0, "maxPosAcc": 2.0, "maxNegAcc": 4.5, "usualPosAcc": 2.0, "usualNegAcc": 4.5, "minGap": 2.5, "maxSpeed": 11.111, "headwayTime": 2}, "route": ["road_3_0_1", "road_3_1_2", "road_2_1_1", "road_2_2_0", "road_3_2_0", "road_4_2_0", "road_5_2_3", "road_5_1_2", "road_4_1_3"], "interval": 1.0, "startTime": 105, "endTime": 105},
{"vehicle": {"length": 5.0, "width": 2.0, "maxPosAcc": 2.0, "maxNegAcc": 4.5, "usualPosAcc": 2.0, "usualNegAcc": 4.5, "minGap": 2.5, "maxSpeed": 11.111, "headwayTime": 2}, "route": ["road_1_0_1", "road_1_1_1", "road_1_2_1", "road_1_3_1", "road_1_4_1", "road_1_5_1", "road_1_6_1", "road_1_7_1", "road_1_8_1", "road_1_9_2"], "interval": 1.0, "startTime": 106, "endTime": 106},
{"vehicle": {"length": 5.0, "width": 2.0, "maxPosAcc": 2.0, "maxNegAcc": 4.5, "usualPosAcc": 2.0, "usualNegAcc": 4.5, "minGap": 2.5, "maxSpeed": 11.111, "headwayTime": 2}, "route": ["road_0_16_0", "road_1_16_0", "road_2_16_3", "road_2_15_3", "road_2_14_3", "road_2_13_3", "road_2_12_3", "road_2_11_3", "road_2_10_3", "road_2_9_3", "road_2_8_3", "road_2_7_3", "road_2_6_3", "road_2_5_3", "road_2_4_3", "road_2_3_3", "road_2_2_3", "road_2_1_3"], "interval": 1.0, "startTime": 106, "endTime": 106},
{"vehicle": {"length": 5.0, "width": 2.0, "maxPosAcc": 2.0, "maxNegAcc": 4.5, "usualPosAcc": 2.0, "usualNegAcc": 4.5, "minGap": 2.5, "maxSpeed": 11.111, "headwayTime": 2}, "route": ["road_8_2_2", "road_7_2_1", "road_7_3_1", "road_7_4_1", "road_7_5_2", "road_6_5_2", "road_5_5_2", "road_4_5_2", "road_3_5_2", "road_2_5_2", "road_1_5_1", "road_1_6_1", "road_1_7_1", "road_1_8_1", "road_1_9_1", "road_1_10_1", "road_1_11_1", "road_1_12_1", "road_1_13_1", "road_1_14_1", "road_1_15_1", "road_1_16_1", "road_1_17_1", "road_1_18_2"], "interval": 1.0, "startTime": 107, "endTime": 107},
{"vehicle": {"length": 5.0, "width": 2.0, "maxPosAcc": 2.0, "maxNegAcc": 4.5, "usualPosAcc": 2.0, "usualNegAcc": 4.5, "minGap": 2.5, "maxSpeed": 11.111, "headwayTime": 2}, "route": ["road_3_0_1", "road_3_1_2", "road_2_1_1", "road_2_2_0", "road_3_2_0", "road_4_2_0", "road_5_2_3", "road_5_1_3"], "interval": 1.0, "startTime": 107, "endTime": 107},
{"vehicle": {"length": 5.0, "width": 2.0, "maxPosAcc": 2.0, "maxNegAcc": 4.5, "usualPosAcc": 2.0, "usualNegAcc": 4.5, "minGap": 2.5, "maxSpeed": 11.111, "headwayTime": 2}, "route": ["road_3_29_3", "road_3_28_3", "road_3_27_2", "road_2_27_3", "road_2_26_3", "road_2_25_3", "road_2_24_3", "road_2_23_3", "road_2_22_3", "road_2_21_3", "road_2_20_3", "road_2_19_3", "road_2_18_3", "road_2_17_3", "road_2_16_3", "road_2_15_3", "road_2_14_3", "road_2_13_3", "road_2_12_3", "road_2_11_2", "road_1_11_2"], "interval": 1.0, "startTime": 107, "endTime": 107},
{"vehicle": {"length": 5.0, "width": 2.0, "maxPosAcc": 2.0, "maxNegAcc": 4.5, "usualPosAcc": 2.0, "usualNegAcc": 4.5, "minGap": 2.5, "maxSpeed": 11.111, "headwayTime": 2}, "route": ["road_3_0_1", "road_3_1_2", "road_2_1_2", "road_1_1_3"], "interval": 1.0, "startTime": 108, "endTime": 108},
{"vehicle": {"length": 5.0, "width": 2.0, "maxPosAcc": 2.0, "maxNegAcc": 4.5, "usualPosAcc": 2.0, "usualNegAcc": 4.5, "minGap": 2.5, "maxSpeed": 11.111, "headwayTime": 2}, "route": ["road_0_20_0", "road_1_20_0", "road_2_20_3", "road_2_19_3", "road_2_18_3", "road_2_17_3", "road_2_16_3", "road_2_15_3", "road_2_14_3", "road_2_13_3", "road_2_12_3", "road_2_11_3", "road_2_10_3", "road_2_9_3", "road_2_8_3", "road_2_7_3", "road_2_6_3", "road_2_5_3", "road_2_4_3", "road_2_3_3", "road_2_2_3", "road_2_1_2", "road_1_1_3"], "interval": 1.0, "startTime": 108, "endTime": 108},
{"vehicle": {"length": 5.0, "width": 2.0, "maxPosAcc": 2.0, "maxNegAcc": 4.5, "usualPosAcc": 2.0, "usualNegAcc": 4.5, "minGap": 2.5, "maxSpeed": 11.111, "headwayTime": 2}, "route": ["road_3_0_1", "road_3_1_2", "road_2_1_2", "road_1_1_1", "road_1_2_1", "road_1_3_1", "road_1_4_1", "road_1_5_1", "road_1_6_1", "road_1_7_1", "road_1_8_1", "road_1_9_1", "road_1_10_1", "road_1_11_1", "road_1_12_1", "road_1_13_1", "road_1_14_2"], "interval": 1.0, "startTime": 109, "endTime": 109},
{"vehicle": {"length": 5.0, "width": 2.0, "maxPosAcc": 2.0, "maxNegAcc": 4.5, "usualPosAcc": 2.0, "usualNegAcc": 4.5, "minGap": 2.5, "maxSpeed": 11.111, "headwayTime": 2}, "route": ["road_1_0_1", "road_1_1_1", "road_1_2_0", "road_2_2_0", "road_3_2_0", "road_4_2_0", "road_5_2_0", "road_6_2_0", "road_7_2_1", "road_7_3_1", "road_7_4_1", "road_7_5_1", "road_7_6_1", "road_7_7_1", "road_7_8_1", "road_7_9_1", "road_7_10_0"], "interval": 1.0, "startTime": 110, "endTime": 110},
{"vehicle": {"length": 5.0, "width": 2.0, "maxPosAcc": 2.0, "maxNegAcc": 4.5, "usualPosAcc": 2.0, "usualNegAcc": 4.5, "minGap": 2.5, "maxSpeed": 11.111, "headwayTime": 2}, "route": ["road_3_29_3", "road_3_28_3", "road_3_27_3", "road_3_26_3", "road_3_25_3", "road_3_24_2", "road_2_24_2", "road_1_24_2"], "interval": 1.0, "startTime": 110, "endTime": 110},
{"vehicle": {"length": 5.0, "width": 2.0, "maxPosAcc": 2.0, "maxNegAcc": 4.5, "usualPosAcc": 2.0, "usualNegAcc": 4.5, "minGap": 2.5, "maxSpeed": 11.111, "headwayTime": 2}, "route": ["road_6_29_3", "road_6_28_0", "road_7_28_3", "road_7_27_2", "road_6_27_2", "road_5_27_3", "road_5_26_3", "road_5_25_2", "road_4_25_2", "road_3_25_2", "road_2_25_3", "road_2_24_3", "road_2_23_3", "road_2_22_3", "road_2_21_3", "road_2_20_3", "road_2_19_3", "road_2_18_3", "road_2_17_3", "road_2_16_3", "road_2_15_3", "road_2_14_3", "road_2_13_3", "road_2_12_3", "road_2_11_3", "road_2_10_3", "road_2_9_3", "road_2_8_3", "road_2_7_3", "road_2_6_3", "road_2_5_3", "road_2_4_3", "road_2_3_3", "road_2_2_3", "road_2_1_3"], "interval": 1.0, "startTime": 110, "endTime": 110},
{"vehicle": {"length": 5.0, "width": 2.0, "maxPosAcc": 2.0, "maxNegAcc": 4.5, "usualPosAcc": 2.0, "usualNegAcc": 4.5, "minGap": 2.5, "maxSpeed": 11.111, "headwayTime": 2}, "route": ["road_1_0_1", "road_1_1_1", "road_1_2_1", "road_1_3_1", "road_1_4_1", "road_1_5_1", "road_1_6_1", "road_1_7_1", "road_1_8_1", "road_1_9_1", "road_1_10_1", "road_1_11_1", "road_1_12_1", "road_1_13_1", "road_1_14_1", "road_1_15_1", "road_1_16_1", "road_1_17_1", "road_1_18_1", "road_1_19_2"], "interval": 1.0, "startTime": 111, "endTime": 111},
{"vehicle": {"length": 5.0, "width": 2.0, "maxPosAcc": 2.0, "maxNegAcc": 4.5, "usualPosAcc": 2.0, "usualNegAcc": 4.5, "minGap": 2.5, "maxSpeed": 11.111, "headwayTime": 2}, "route": ["road_0_15_0", "road_1_15_1", "road_1_16_0", "road_2_16_0", "road_3_16_0", "road_4_16_0", "road_5_16_0", "road_6_16_0", "road_7_16_3", "road_7_15_0"], "interval": 1.0, "startTime": 111, "endTime": 111},
{"vehicle": {"length": 5.0, "width": 2.0, "maxPosAcc": 2.0, "maxNegAcc": 4.5, "usualPosAcc": 2.0, "usualNegAcc": 4.5, "minGap": 2.5, "maxSpeed": 11.111, "headwayTime": 2}, "route": ["road_0_23_0", "road_1_23_1", "road_1_24_0", "road_2_24_3", "road_2_23_3", "road_2_22_3", "road_2_21_3", "road_2_20_3", "road_2_19_3", "road_2_18_3", "road_2_17_3", "road_2_16_3", "road_2_15_3", "road_2_14_3", "road_2_13_3", "road_2_12_3", "road_2_11_3", "road_2_10_3", "road_2_9_3", "road_2_8_3", "road_2_7_3", "road_2_6_3", "road_2_5_2", "road_1_5_1", "road_1_6_2"], "interval": 1.0, "startTime": 111, "endTime": 111},
{"vehicle": {"length": 5.0, "width": 2.0, "maxPosAcc": 2.0, "maxNegAcc": 4.5, "usualPosAcc": 2.0, "usualNegAcc": 4.5, "minGap": 2.5, "maxSpeed": 11.111, "headwayTime": 2}, "route": ["road_8_9_2", "road_7_9_2", "road_6_9_2", "road_5_9_2", "road_4_9_2", "road_3_9_2", "road_2_9_2", "road_1_9_1", "road_1_10_1", "road_1_11_1", "road_1_12_1", "road_1_13_1", "road_1_14_1", "road_1_15_1", "road_1_16_1", "road_1_17_1", "road_1_18_1", "road_1_19_1", "road_1_20_1", "road_1_21_1", "road_1_22_1", "road_1_23_1", "road_1_24_1", "road_1_25_1", "road_1_26_1", "road_1_27_1", "road_1_28_0", "road_2_28_1"], "interval": 1.0, "startTime": 112, "endTime": 112},
{"vehicle": {"length": 5.0, "width": 2.0, "maxPosAcc": 2.0, "maxNegAcc": 4.5, "usualPosAcc": 2.0, "usualNegAcc": 4.5, "minGap": 2.5, "maxSpeed": 11.111, "headwayTime": 2}, "route": ["road_1_0_1", "road_1_1_1", "road_1_2_0", "road_2_2_0", "road_3_2_0", "road_4_2_0", "road_5_2_0", "road_6_2_0", "road_7_2_1", "road_7_3_1", "road_7_4_0"], "interval": 1.0, "startTime": 112, "endTime": 112},
{"vehicle": {"length": 5.0, "width": 2.0, "maxPosAcc": 2.0, "maxNegAcc": 4.5, "usualPosAcc": 2.0, "usualNegAcc": 4.5, "minGap": 2.5, "maxSpeed": 11.111, "headwayTime": 2}, "route": ["road_0_20_0", "road_1_20_0", "road_2_20_1", "road_2_21_1", "road_2_22_1", "road_2_23_1", "road_2_24_1", "road_2_25_1", "road_2_26_0", "road_3_26_0", "road_4_26_1", "road_4_27_1", "road_4_28_1"], "interval": 1.0, "startTime": 112, "endTime": 112},
{"vehicle": {"length": 5.0, "width": 2.0, "maxPosAcc": 2.0, "maxNegAcc": 4.5, "usualPosAcc": 2.0, "usualNegAcc": 4.5, "minGap": 2.5, "maxSpeed": 11.111, "headwayTime": 2}, "route": ["road_1_0_1", "road_1_1_1", "road_1_2_1", "road_1_3_2"], "interval": 1.0, "startTime": 114, "endTime": 114},
{"vehicle": {"length": 5.0, "width": 2.0, "maxPosAcc": 2.0, "maxNegAcc": 4.5, "usualPosAcc": 2.0, "usualNegAcc": 4.5, "minGap": 2.5, "maxSpeed": 11.111, "headwayTime": 2}, "route": ["road_0_22_0", "road_1_22_1", "road_1_23_2"], "interval": 1.0, "startTime": 114, "endTime": 114},
{"vehicle": {"length": 5.0, "width": 2.0, "maxPosAcc": 2.0, "maxNegAcc": 4.5, "usualPosAcc": 2.0, "usualNegAcc": 4.5, "minGap": 2.5, "maxSpeed": 11.111, "headwayTime": 2}, "route": ["road_2_29_3", "road_2_28_0", "road_3_28_3", "road_3_27_2", "road_2_27_3", "road_2_26_3", "road_2_25_3", "road_2_24_3", "road_2_23_3", "road_2_22_3", "road_2_21_3", "road_2_20_3", "road_2_19_3", "road_2_18_3", "road_2_17_3", "road_2_16_3", "road_2_15_3", "road_2_14_3", "road_2_13_3", "road_2_12_3", "road_2_11_3", "road_2_10_3", "road_2_9_3", "road_2_8_3", "road_2_7_3", "road_2_6_3", "road_2_5_3", "road_2_4_3", "road_2_3_3", "road_2_2_3", "road_2_1_2", "road_1_1_3"], "interval": 1.0, "startTime": 114, "endTime": 114},
{"vehicle": {"length": 5.0, "width": 2.0, "maxPosAcc": 2.0, "maxNegAcc": 4.5, "usualPosAcc": 2.0, "usualNegAcc": 4.5, "minGap": 2.5, "maxSpeed": 11.111, "headwayTime": 2}, "route": ["road_0_23_0", "road_1_23_1", "road_1_24_0", "road_2_24_3", "road_2_23_3", "road_2_22_3", "road_2_21_3", "road_2_20_3", "road_2_19_3", "road_2_18_3", "road_2_17_3", "road_2_16_3", "road_2_15_3", "road_2_14_3", "road_2_13_3", "road_2_12_3", "road_2_11_3", "road_2_10_3", "road_2_9_3", "road_2_8_3", "road_2_7_3", "road_2_6_3", "road_2_5_3", "road_2_4_3", "road_2_3_3", "road_2_2_3", "road_2_1_2", "road_1_1_3"], "interval": 1.0, "startTime": 114, "endTime": 114},
{"vehicle": {"length": 5.0, "width": 2.0, "maxPosAcc": 2.0, "maxNegAcc": 4.5, "usualPosAcc": 2.0, "usualNegAcc": 4.5, "minGap": 2.5, "maxSpeed": 11.111, "headwayTime": 2}, "route": ["road_8_8_2", "road_7_8_3", "road_7_7_2", "road_6_7_2", "road_5_7_2", "road_4_7_2", "road_3_7_3", "road_3_6_3", "road_3_5_3", "road_3_4_3", "road_3_3_3", "road_3_2_3", "road_3_1_3"], "interval": 1.0, "startTime": 115, "endTime": 115},
{"vehicle": {"length": 5.0, "width": 2.0, "maxPosAcc": 2.0, "maxNegAcc": 4.5, "usualPosAcc": 2.0, "usualNegAcc": 4.5, "minGap": 2.5, "maxSpeed": 11.111, "headwayTime": 2}, "route": ["road_8_26_2", "road_7_26_3", "road_7_25_2", "road_6_25_2", "road_5_25_2", "road_4_25_2", "road_3_25_2", "road_2_25_3", "road_2_24_3", "road_2_23_3", "road_2_22_3", "road_2_21_3", "road_2_20_3", "road_2_19_3", "road_2_18_3", "road_2_17_3", "road_2_16_3", "road_2_15_2", "road_1_15_2"], "interval": 1.0, "startTime": 115, "endTime": 115},
{"vehicle": {"length": 5.0, "width": 2.0, "maxPosAcc": 2.0, "maxNegAcc": 4.5, "usualPosAcc": 2.0, "usualNegAcc": 4.5, "minGap": 2.5, "maxSpeed": 11.111, "headwayTime": 2}, "route": ["road_2_0_1", "road_2_1_2", "road_1_1_3"], "interval": 1.0, "startTime": 115, "endTime": 115},
{"vehicle": {"length": 5.0, "width": 2.0, "maxPosAcc": 2.0, "maxNegAcc": 4.5, "usualPosAcc": 2.0, "usualNegAcc": 4.5, "minGap": 2.5, "maxSpeed": 11.111, "headwayTime": 2}, "route": ["road_0_12_0", "road_1_12_0", "road_2_12_3", "road_2_11_3", "road_2_10_3", "road_2_9_3", "road_2_8_3", "road_2_7_3", "road_2_6_3", "road_2_5_3", "road_2_4_3", "road_2_3_3", "road_2_2_0", "road_3_2_0", "road_4_2_0", "road_5_2_3", "road_5_1_3"], "interval": 1.0, "startTime": 115, "endTime": 115},
{"vehicle": {"length": 5.0, "width": 2.0, "maxPosAcc": 2.0, "maxNegAcc": 4.5, "usualPosAcc": 2.0, "usualNegAcc": 4.5, "minGap": 2.5, "maxSpeed": 11.111, "headwayTime": 2}, "route": ["road_5_29_3", "road_5_28_0", "road_6_28_1"], "interval": 1.0, "startTime": 115, "endTime": 115},
{"vehicle": {"length": 5.0, "width": 2.0, "maxPosAcc": 2.0, "maxNegAcc": 4.5, "usualPosAcc": 2.0, "usualNegAcc": 4.5, "minGap": 2.5, "maxSpeed": 11.111, "headwayTime": 2}, "route": ["road_5_29_3", "road_5_28_3", "road_5_27_2", "road_4_27_2", "road_3_27_2", "road_2_27_1", "road_2_28_1"], "interval": 1.0, "startTime": 116, "endTime": 116},
{"vehicle": {"length": 5.0, "width": 2.0, "maxPosAcc": 2.0, "maxNegAcc": 4.5, "usualPosAcc": 2.0, "usualNegAcc": 4.5, "minGap": 2.5, "maxSpeed": 11.111, "headwayTime": 2}, "route": ["road_8_9_2", "road_7_9_2", "road_6_9_2", "road_5_9_2", "road_4_9_2", "road_3_9_3", "road_3_8_3", "road_3_7_3", "road_3_6_3", "road_3_5_3", "road_3_4_3", "road_3_3_3", "road_3_2_3", "road_3_1_2", "road_2_1_2", "road_1_1_3"], "interval": 1.0, "startTime": 117, "endTime": 117},
{"vehicle": {"length": 5.0, "width": 2.0, "maxPosAcc": 2.0, "maxNegAcc": 4.5, "usualPosAcc": 2.0, "usualNegAcc": 4.5, "minGap": 2.5, "maxSpeed": 11.111, "headwayTime": 2}, "route": ["road_8_10_2", "road_7_10_2", "road_6_10_2", "road_5_10_3", "road_5_9_2", "road_4_9_2", "road_3_9_3", "road_3_8_3", "road_3_7_3", "road_3_6_3", "road_3_5_3", "road_3_4_3", "road_3_3_3", "road_3_2_3", "road_3_1_2", "road_2_1_2", "road_1_1_3"], "interval": 1.0, "startTime": 117, "endTime": 117},
{"vehicle": {"length": 5.0, "width": 2.0, "maxPosAcc": 2.0, "maxNegAcc": 4.5, "usualPosAcc": 2.0, "usualNegAcc": 4.5, "minGap": 2.5, "maxSpeed": 11.111, "headwayTime": 2}, "route": ["road_1_0_1", "road_1_1_1", "road_1_2_1", "road_1_3_1", "road_1_4_1", "road_1_5_1", "road_1_6_1", "road_1_7_1", "road_1_8_1", "road_1_9_1", "road_1_10_1", "road_1_11_1", "road_1_12_1", "road_1_13_1", "road_1_14_1", "road_1_15_1", "road_1_16_1", "road_1_17_1", "road_1_18_1", "road_1_19_1", "road_1_20_1", "road_1_21_2"], "interval": 1.0, "startTime": 117, "endTime": 117},
{"vehicle": {"length": 5.0, "width": 2.0, "maxPosAcc": 2.0, "maxNegAcc": 4.5, "usualPosAcc": 2.0, "usualNegAcc": 4.5, "minGap": 2.5, "maxSpeed": 11.111, "headwayTime": 2}, "route": ["road_0_16_0", "road_1_16_0", "road_2_16_3", "road_2_15_3", "road_2_14_3", "road_2_13_3", "road_2_12_3", "road_2_11_3", "road_2_10_3", "road_2_9_3", "road_2_8_3", "road_2_7_3", "road_2_6_3", "road_2_5_3", "road_2_4_3", "road_2_3_3", "road_2_2_3", "road_2_1_3"], "interval": 1.0, "startTime": 117, "endTime": 117},
{"vehicle": {"length": 5.0, "width": 2.0, "maxPosAcc": 2.0, "maxNegAcc": 4.5, "usualPosAcc": 2.0, "usualNegAcc": 4.5, "minGap": 2.5, "maxSpeed": 11.111, "headwayTime": 2}, "route": ["road_0_19_0", "road_1_19_1", "road_1_20_1", "road_1_21_1", "road_1_22_1", "road_1_23_1", "road_1_24_1", "road_1_25_1", "road_1_26_1", "road_1_27_1", "road_1_28_1"], "interval": 1.0, "startTime": 117, "endTime": 117},
{"vehicle": {"length": 5.0, "width": 2.0, "maxPosAcc": 2.0, "maxNegAcc": 4.5, "usualPosAcc": 2.0, "usualNegAcc": 4.5, "minGap": 2.5, "maxSpeed": 11.111, "headwayTime": 2}, "route": ["road_8_20_2", "road_7_20_3", "road_7_19_2", "road_6_19_2", "road_5_19_2", "road_4_19_2", "road_3_19_2", "road_2_19_3", "road_2_18_3", "road_2_17_3", "road_2_16_3", "road_2_15_3", "road_2_14_3", "road_2_13_3", "road_2_12_3", "road_2_11_3", "road_2_10_3", "road_2_9_3", "road_2_8_3", "road_2_7_2", "road_1_7_1", "road_1_8_2"], "interval": 1.0, "startTime": 118, "endTime": 118},
{"vehicle": {"length": 5.0, "width": 2.0, "maxPosAcc": 2.0, "maxNegAcc": 4.5, "usualPosAcc": 2.0, "usualNegAcc": 4.5, "minGap": 2.5, "maxSpeed": 11.111, "headwayTime": 2}, "route": ["road_1_29_3", "road_1_28_0", "road_2_28_3", "road_2_27_3", "road_2_26_3", "road_2_25_3", "road_2_24_3", "road_2_23_3", "road_2_22_3", "road_2_21_3", "road_2_20_3", "road_2_19_2", "road_1_19_2"], "interval": 1.0, "startTime": 118, "endTime": 118},
{"vehicle": {"length": 5.0, "width": 2.0, "maxPosAcc": 2.0, "maxNegAcc": 4.5, "usualPosAcc": 2.0, "usualNegAcc": 4.5, "minGap": 2.5, "maxSpeed": 11.111, "headwayTime": 2}, "route": ["road_2_0_1", "road_2_1_2", "road_1_1_3"], "interval": 1.0, "startTime": 118, "endTime": 118},
{"vehicle": {"length": 5.0, "width": 2.0, "maxPosAcc": 2.0, "maxNegAcc": 4.5, "usualPosAcc": 2.0, "usualNegAcc": 4.5, "minGap": 2.5, "maxSpeed": 11.111, "headwayTime": 2}, "route": ["road_8_6_2", "road_7_6_3", "road_7_5_2", "road_6_5_2", "road_5_5_2", "road_4_5_2", "road_3_5_3", "road_3_4_3", "road_3_3_3", "road_3_2_3", "road_3_1_2", "road_2_1_2", "road_1_1_3"], "interval": 1.0, "startTime": 120, "endTime": 120},
{"vehicle": {"length": 5.0, "width": 2.0, "maxPosAcc": 2.0, "maxNegAcc": 4.5, "usualPosAcc": 2.0, "usualNegAcc": 4.5, "minGap": 2.5, "maxSpeed": 11.111, "headwayTime": 2}, "route": ["road_8_7_2", "road_7_7_2", "road_6_7_2", "road_5_7_3", "road_5_6_3", "road_5_5_2", "road_4_5_2", "road_3_5_3", "road_3_4_3", "road_3_3_3", "road_3_2_3", "road_3_1_2", "road_2_1_3"], "interval": 1.0, "startTime": 120, "endTime": 120},
{"vehicle": {"length": 5.0, "width": 2.0, "maxPosAcc": 2.0, "maxNegAcc": 4.5, "usualPosAcc": 2.0, "usualNegAcc": 4.5, "minGap": 2.5, "maxSpeed": 11.111, "headwayTime": 2}, "route": ["road_8_8_2", "road_7_8_3", "road_7_7_2", "road_6_7_2", "road_5_7_2", "road_4_7_2", "road_3_7_3", "road_3_6_3", "road_3_5_3", "road_3_4_3", "road_3_3_3", "road_3_2_3", "road_3_1_2", "road_2_1_3"], "interval": 1.0, "startTime": 120, "endTime": 120},
{"vehicle": {"length": 5.0, "width": 2.0, "maxPosAcc": 2.0, "maxNegAcc": 4.5, "usualPosAcc": 2.0, "usualNegAcc": 4.5, "minGap": 2.5, "maxSpeed": 11.111, "headwayTime": 2}, "route": ["road_8_9_2", "road_7_9_2", "road_6_9_2", "road_5_9_2", "road_4_9_2", "road_3_9_3", "road_3_8_3", "road_3_7_3", "road_3_6_3", "road_3_5_3", "road_3_4_3", "road_3_3_3", "road_3_2_3", "road_3_1_2", "road_2_1_2", "road_1_1_3"], "interval": 1.0, "startTime": 120, "endTime": 120},
{"vehicle": {"length": 5.0, "width": 2.0, "maxPosAcc": 2.0, "maxNegAcc": 4.5, "usualPosAcc": 2.0, "usualNegAcc": 4.5, "minGap": 2.5, "maxSpeed": 11.111, "headwayTime": 2}, "route": ["road_8_14_2", "road_7_14_1", "road_7_15_1", "road_7_16_1", "road_7_17_1", "road_7_18_1", "road_7_19_1", "road_7_20_1", "road_7_21_1", "road_7_22_1", "road_7_23_1", "road_7_24_1", "road_7_25_1", "road_7_26_1", "road_7_27_1", "road_7_28_1"], "interval": 1.0, "startTime": 120, "endTime": 120},
{"vehicle": {"length": 5.0, "width": 2.0, "maxPosAcc": 2.0, "maxNegAcc": 4.5, "usualPosAcc": 2.0, "usualNegAcc": 4.5, "minGap": 2.5, "maxSpeed": 11.111, "headwayTime": 2}, "route": ["road_8_18_2", "road_7_18_3", "road_7_17_3", "road_7_16_3", "road_7_15_3", "road_7_14_3", "road_7_13_3", "road_7_12_3", "road_7_11_3", "road_7_10_3", "road_7_9_3", "road_7_8_3", "road_7_7_3", "road_7_6_3", "road_7_5_3", "road_7_4_3", "road_7_3_3", "road_7_2_0"], "interval": 1.0, "startTime": 120, "endTime": 120},
{"vehicle": {"length": 5.0, "width": 2.0, "maxPosAcc": 2.0, "maxNegAcc": 4.5, "usualPosAcc": 2.0, "usualNegAcc": 4.5, "minGap": 2.5, "maxSpeed": 11.111, "headwayTime": 2}, "route": ["road_8_22_2", "road_7_22_1", "road_7_23_2", "road_6_23_2", "road_5_23_2", "road_4_23_2", "road_3_23_2", "road_2_23_1", "road_2_24_1", "road_2_25_1", "road_2_26_1", "road_2_27_1", "road_2_28_1"], "interval": 1.0, "startTime": 120, "endTime": 120},
{"vehicle": {"length": 5.0, "width": 2.0, "maxPosAcc": 2.0, "maxNegAcc": 4.5, "usualPosAcc": 2.0, "usualNegAcc": 4.5, "minGap": 2.5, "maxSpeed": 11.111, "headwayTime": 2}, "route": ["road_0_24_0", "road_1_24_0", "road_2_24_1", "road_2_25_1", "road_2_26_0", "road_3_26_0", "road_4_26_1", "road_4_27_1", "road_4_28_1"], "interval": 1.0, "startTime": 120, "endTime": 120},
{"vehicle": {"length": 5.0, "width": 2.0, "maxPosAcc": 2.0, "maxNegAcc": 4.5, "usualPosAcc": 2.0, "usualNegAcc": 4.5, "minGap": 2.5, "maxSpeed": 11.111, "headwayTime": 2}, "route": ["road_0_8_0", "road_1_8_1", "road_1_9_1", "road_1_10_1", "road_1_11_1", "road_1_12_1", "road_1_13_1", "road_1_14_1", "road_1_15_1", "road_1_16_1", "road_1_17_1", "road_1_18_2"], "interval": 1.0, "startTime": 120, "endTime": 120},
{"vehicle": {"length": 5.0, "width": 2.0, "maxPosAcc": 2.0, "maxNegAcc": 4.5, "usualPosAcc": 2.0, "usualNegAcc": 4.5, "minGap": 2.5, "maxSpeed": 11.111, "headwayTime": 2}, "route": ["road_1_0_1", "road_1_1_1", "road_1_2_0", "road_2_2_3", "road_2_1_3"], "interval": 1.0, "startTime": 120, "endTime": 120},
{"vehicle": {"length": 5.0, "width": 2.0, "maxPosAcc": 2.0, "maxNegAcc": 4.5, "usualPosAcc": 2.0, "usualNegAcc": 4.5, "minGap": 2.5, "maxSpeed": 11.111, "headwayTime": 2}, "route": ["road_2_0_1", "road_2_1_1", "road_2_2_0", "road_3_2_3", "road_3_1_3"], "interval": 1.0, "startTime": 120, "endTime": 120},
{"vehicle": {"length": 5.0, "width": 2.0, "maxPosAcc": 2.0, "maxNegAcc": 4.5, "usualPosAcc": 2.0, "usualNegAcc": 4.5, "minGap": 2.5, "maxSpeed": 11.111, "headwayTime": 2}, "route": ["road_3_0_1", "road_3_1_2", "road_2_1_2", "road_1_1_3"], "interval": 1.0, "startTime": 120, "endTime": 120},
{"vehicle": {"length": 5.0, "width": 2.0, "maxPosAcc": 2.0, "maxNegAcc": 4.5, "usualPosAcc": 2.0, "usualNegAcc": 4.5, "minGap": 2.5, "maxSpeed": 11.111, "headwayTime": 2}, "route": ["road_4_0_1", "road_4_1_1", "road_4_2_0", "road_5_2_0", "road_6_2_0", "road_7_2_1", "road_7_3_1", "road_7_4_1", "road_7_5_1", "road_7_6_1", "road_7_7_1", "road_7_8_1", "road_7_9_1", "road_7_10_1", "road_7_11_1", "road_7_12_1", "road_7_13_1", "road_7_14_1", "road_7_15_1", "road_7_16_1", "road_7_17_1", "road_7_18_0"], "interval": 1.0, "startTime": 120, "endTime": 120},
{"vehicle": {"length": 5.0, "width": 2.0, "maxPosAcc": 2.0, "maxNegAcc": 4.5, "usualPosAcc": 2.0, "usualNegAcc": 4.5, "minGap": 2.5, "maxSpeed": 11.111, "headwayTime": 2}, "route": ["road_5_0_1", "road_5_1_2", "road_4_1_2", "road_3_1_2", "road_2_1_2", "road_1_1_3"], "interval": 1.0, "startTime": 120, "endTime": 120},
{"vehicle": {"length": 5.0, "width": 2.0, "maxPosAcc": 2.0, "maxNegAcc": 4.5, "usualPosAcc": 2.0, "usualNegAcc": 4.5, "minGap": 2.5, "maxSpeed": 11.111, "headwayTime": 2}, "route": ["road_6_0_1", "road_6_1_2", "road_5_1_2", "road_4_1_2", "road_3_1_2", "road_2_1_2", "road_1_1_3"], "interval": 1.0, "startTime": 120, "endTime": 120},
{"vehicle": {"length": 5.0, "width": 2.0, "maxPosAcc": 2.0, "maxNegAcc": 4.5, "usualPosAcc": 2.0, "usualNegAcc": 4.5, "minGap": 2.5, "maxSpeed": 11.111, "headwayTime": 2}, "route": ["road_0_2_0", "road_1_2_1", "road_1_3_1", "road_1_4_1", "road_1_5_1", "road_1_6_1", "road_1_7_1", "road_1_8_1", "road_1_9_1", "road_1_10_1", "road_1_11_1", "road_1_12_1", "road_1_13_1", "road_1_14_1", "road_1_15_1", "road_1_16_1", "road_1_17_2"], "interval": 1.0, "startTime": 120, "endTime": 120},
{"vehicle": {"length": 5.0, "width": 2.0, "maxPosAcc": 2.0, "maxNegAcc": 4.5, "usualPosAcc": 2.0, "usualNegAcc": 4.5, "minGap": 2.5, "maxSpeed": 11.111, "headwayTime": 2}, "route": ["road_0_16_0", "road_1_16_0", "road_2_16_3", "road_2_15_3", "road_2_14_3", "road_2_13_3", "road_2_12_3", "road_2_11_3", "road_2_10_3", "road_2_9_3", "road_2_8_3", "road_2_7_3", "road_2_6_3", "road_2_5_3", "road_2_4_3", "road_2_3_3", "road_2_2_3", "road_2_1_2", "road_1_1_3"], "interval": 1.0, "startTime": 120, "endTime": 120},
{"vehicle": {"length": 5.0, "width": 2.0, "maxPosAcc": 2.0, "maxNegAcc": 4.5, "usualPosAcc": 2.0, "usualNegAcc": 4.5, "minGap": 2.5, "maxSpeed": 11.111, "headwayTime": 2}, "route": ["road_0_5_0", "road_1_5_1", "road_1_6_0", "road_2_6_3", "road_2_5_3", "road_2_4_3", "road_2_3_3", "road_2_2_3", "road_2_1_3"], "interval": 1.0, "startTime": 120, "endTime": 120},
{"vehicle": {"length": 5.0, "width": 2.0, "maxPosAcc": 2.0, "maxNegAcc": 4.5, "usualPosAcc": 2.0, "usualNegAcc": 4.5, "minGap": 2.5, "maxSpeed": 11.111, "headwayTime": 2}, "route": ["road_0_18_0", "road_1_18_0", "road_2_18_3", "road_2_17_3", "road_2_16_3", "road_2_15_3", "road_2_14_3", "road_2_13_3", "road_2_12_3", "road_2_11_3", "road_2_10_3", "road_2_9_3", "road_2_8_3", "road_2_7_3", "road_2_6_3", "road_2_5_3", "road_2_4_3", "road_2_3_3", "road_2_2_0", "road_3_2_3", "road_3_1_2", "road_2_1_3"], "interval": 1.0, "startTime": 120, "endTime": 120},
{"vehicle": {"length": 5.0, "width": 2.0, "maxPosAcc": 2.0, "maxNegAcc": 4.5, "usualPosAcc": 2.0, "usualNegAcc": 4.5, "minGap": 2.5, "maxSpeed": 11.111, "headwayTime": 2}, "route": ["road_0_11_0", "road_1_11_1", "road_1_12_0", "road_2_12_3", "road_2_11_3", "road_2_10_3", "road_2_9_3", "road_2_8_3", "road_2_7_3", "road_2_6_3", "road_2_5_3", "road_2_4_3", "road_2_3_3", "road_2_2_0", "road_3_2_3", "road_3_1_3"], "interval": 1.0, "startTime": 120, "endTime": 120},
{"vehicle": {"length": 5.0, "width": 2.0, "maxPosAcc": 2.0, "maxNegAcc": 4.5, "usualPosAcc": 2.0, "usualNegAcc": 4.5, "minGap": 2.5, "maxSpeed": 11.111, "headwayTime": 2}, "route": ["road_0_12_0", "road_1_12_1", "road_1_13_1", "road_1_14_1", "road_1_15_1", "road_1_16_1", "road_1_17_1", "road_1_18_1", "road_1_19_1", "road_1_20_1", "road_1_21_1", "road_1_22_1", "road_1_23_2"], "interval": 1.0, "startTime": 120, "endTime": 120},
{"vehicle": {"length": 5.0, "width": 2.0, "maxPosAcc": 2.0, "maxNegAcc": 4.5, "usualPosAcc": 2.0, "usualNegAcc": 4.5, "minGap": 2.5, "maxSpeed": 11.111, "headwayTime": 2}, "route": ["road_1_29_3", "road_1_28_0", "road_2_28_3", "road_2_27_3", "road_2_26_3", "road_2_25_3", "road_2_24_3", "road_2_23_3", "road_2_22_3", "road_2_21_3", "road_2_20_3", "road_2_19_3", "road_2_18_3", "road_2_17_3", "road_2_16_3", "road_2_15_3", "road_2_14_3", "road_2_13_3", "road_2_12_3", "road_2_11_3", "road_2_10_3", "road_2_9_3", "road_2_8_3", "road_2_7_3", "road_2_6_3", "road_2_5_2", "road_1_5_1", "road_1_6_2"], "interval": 1.0, "startTime": 120, "endTime": 120},
{"vehicle": {"length": 5.0, "width": 2.0, "maxPosAcc": 2.0, "maxNegAcc": 4.5, "usualPosAcc": 2.0, "usualNegAcc": 4.5, "minGap": 2.5, "maxSpeed": 11.111, "headwayTime": 2}, "route": ["road_3_29_3", "road_3_28_0", "road_4_28_0", "road_5_28_3", "road_5_27_3", "road_5_26_3", "road_5_25_3", "road_5_24_3", "road_5_23_3", "road_5_22_0", "road_6_22_0", "road_7_22_3", "road_7_21_3", "road_7_20_0"], "interval": 1.0, "startTime": 120, "endTime": 120},
{"vehicle": {"length": 5.0, "width": 2.0, "maxPosAcc": 2.0, "maxNegAcc": 4.5, "usualPosAcc": 2.0, "usualNegAcc": 4.5, "minGap": 2.5, "maxSpeed": 11.111, "headwayTime": 2}, "route": ["road_4_29_3", "road_4_28_0", "road_5_28_3", "road_5_27_3", "road_5_26_3", "road_5_25_2", "road_4_25_2", "road_3_25_2", "road_2_25_3", "road_2_24_3", "road_2_23_3", "road_2_22_3", "road_2_21_3", "road_2_20_3", "road_2_19_3", "road_2_18_3", "road_2_17_3", "road_2_16_3", "road_2_15_3", "road_2_14_3", "road_2_13_2", "road_1_13_2"], "interval": 1.0, "startTime": 120, "endTime": 120},
{"vehicle": {"length": 5.0, "width": 2.0, "maxPosAcc": 2.0, "maxNegAcc": 4.5, "usualPosAcc": 2.0, "usualNegAcc": 4.5, "minGap": 2.5, "maxSpeed": 11.111, "headwayTime": 2}, "route": ["road_6_29_3", "road_6_28_0", "road_7_28_3", "road_7_27_2", "road_6_27_2", "road_5_27_3", "road_5_26_3", "road_5_25_2", "road_4_25_2", "road_3_25_2", "road_2_25_3", "road_2_24_3", "road_2_23_3", "road_2_22_3", "road_2_21_2", "road_1_21_1", "road_1_22_2"], "interval": 1.0, "startTime": 120, "endTime": 120},
{"vehicle": {"length": 5.0, "width": 2.0, "maxPosAcc": 2.0, "maxNegAcc": 4.5, "usualPosAcc": 2.0, "usualNegAcc": 4.5, "minGap": 2.5, "maxSpeed": 11.111, "headwayTime": 2}, "route": ["road_0_7_0", "road_1_7_1", "road_1_8_2"], "interval": 1.0, "startTime": 120, "endTime": 120},
{"vehicle": {"length": 5.0, "width": 2.0, "maxPosAcc": 2.0, "maxNegAcc": 4.5, "usualPosAcc": 2.0, "usualNegAcc": 4.5, "minGap": 2.5, "maxSpeed": 11.111, "headwayTime": 2}, "route": ["road_0_14_0", "road_1_14_0", "road_2_14_0", "road_3_14_0", "road_4_14_0", "road_5_14_0", "road_6_14_0", "road_7_14_3", "road_7_13_3", "road_7_12_3", "road_7_11_3", "road_7_10_3", "road_7_9_3", "road_7_8_3", "road_7_7_3", "road_7_6_3", "road_7_5_3", "road_7_4_3", "road_7_3_0"], "interval": 1.0, "startTime": 120, "endTime": 120},
{"vehicle": {"length": 5.0, "width": 2.0, "maxPosAcc": 2.0, "maxNegAcc": 4.5, "usualPosAcc": 2.0, "usualNegAcc": 4.5, "minGap": 2.5, "maxSpeed": 11.111, "headwayTime": 2}, "route": ["road_0_15_0", "road_1_15_1", "road_1_16_0", "road_2_16_3", "road_2_15_3", "road_2_14_3", "road_2_13_3", "road_2_12_3", "road_2_11_3", "road_2_10_3", "road_2_9_3", "road_2_8_3", "road_2_7_3", "road_2_6_3", "road_2_5_3", "road_2_4_3", "road_2_3_3", "road_2_2_0", "road_3_2_0", "road_4_2_0", "road_5_2_3", "road_5_1_3"], "interval": 1.0, "startTime": 120, "endTime": 120},
{"vehicle": {"length": 5.0, "width": 2.0, "maxPosAcc": 2.0, "maxNegAcc": 4.5, "usualPosAcc": 2.0, "usualNegAcc": 4.5, "minGap": 2.5, "maxSpeed": 11.111, "headwayTime": 2}, "route": ["road_2_0_1", "road_2_1_2", "road_1_1_1", "road_1_2_0", "road_2_2_1", "road_2_3_1", "road_2_4_1", "road_2_5_1", "road_2_6_1", "road_2_7_1", "road_2_8_1", "road_2_9_1", "road_2_10_1", "road_2_11_1", "road_2_12_1", "road_2_13_1", "road_2_14_1", "road_2_15_1", "road_2_16_1", "road_2_17_1", "road_2_18_1", "road_2_19_1", "road_2_20_1", "road_2_21_1", "road_2_22_1", "road_2_23_1", "road_2_24_1", "road_2_25_1", "road_2_26_0", "road_3_26_0", "road_4_26_1", "road_4_27_1", "road_4_28_1"], "interval": 1.0, "startTime": 120, "endTime": 120},
{"vehicle": {"length": 5.0, "width": 2.0, "maxPosAcc": 2.0, "maxNegAcc": 4.5, "usualPosAcc": 2.0, "usualNegAcc": 4.5, "minGap": 2.5, "maxSpeed": 11.111, "headwayTime": 2}, "route": ["road_2_29_3", "road_2_28_3", "road_2_27_3", "road_2_26_3", "road_2_25_3", "road_2_24_3", "road_2_23_3", "road_2_22_3", "road_2_21_3", "road_2_20_3", "road_2_19_3", "road_2_18_3", "road_2_17_3", "road_2_16_3", "road_2_15_3", "road_2_14_3", "road_2_13_3", "road_2_12_3", "road_2_11_3", "road_2_10_3", "road_2_9_3", "road_2_8_3", "road_2_7_3", "road_2_6_3", "road_2_5_3", "road_2_4_3", "road_2_3_3", "road_2_2_3", "road_2_1_3"], "interval": 1.0, "startTime": 120, "endTime": 120},
{"vehicle": {"length": 5.0, "width": 2.0, "maxPosAcc": 2.0, "maxNegAcc": 4.5, "usualPosAcc": 2.0, "usualNegAcc": 4.5, "minGap": 2.5, "maxSpeed": 11.111, "headwayTime": 2}, "route": ["road_8_23_2", "road_7_23_3", "road_7_22_3", "road_7_21_3", "road_7_20_3", "road_7_19_3", "road_7_18_3", "road_7_17_3", "road_7_16_3", "road_7_15_3", "road_7_14_0"], "interval": 1.0, "startTime": 121, "endTime": 121},
{"vehicle": {"length": 5.0, "width": 2.0, "maxPosAcc": 2.0, "maxNegAcc": 4.5, "usualPosAcc": 2.0, "usualNegAcc": 4.5, "minGap": 2.5, "maxSpeed": 11.111, "headwayTime": 2}, "route": ["road_0_14_0", "road_1_14_0", "road_2_14_3", "road_2_13_3", "road_2_12_3", "road_2_11_3", "road_2_10_3", "road_2_9_3", "road_2_8_3", "road_2_7_3", "road_2_6_3", "road_2_5_3", "road_2_4_3", "road_2_3_3", "road_2_2_3", "road_2_1_2", "road_1_1_3"], "interval": 1.0, "startTime": 121, "endTime": 121},
{"vehicle": {"length": 5.0, "width": 2.0, "maxPosAcc": 2.0, "maxNegAcc": 4.5, "usualPosAcc": 2.0, "usualNegAcc": 4.5, "minGap": 2.5, "maxSpeed": 11.111, "headwayTime": 2}, "route": ["road_8_10_2", "road_7_10_2", "road_6_10_2", "road_5_10_3", "road_5_9_2", "road_4_9_2", "road_3_9_3", "road_3_8_3", "road_3_7_3", "road_3_6_3", "road_3_5_3", "road_3_4_3", "road_3_3_3", "road_3_2_3", "road_3_1_2", "road_2_1_2", "road_1_1_3"], "interval": 1.0, "startTime": 122, "endTime": 122},
{"vehicle": {"length": 5.0, "width": 2.0, "maxPosAcc": 2.0, "maxNegAcc": 4.5, "usualPosAcc": 2.0, "usualNegAcc": 4.5, "minGap": 2.5, "maxSpeed": 11.111, "headwayTime": 2}, "route": ["road_8_17_2", "road_7_17_2", "road_6_17_2", "road_5_17_2", "road_4_17_2", "road_3_17_2", "road_2_17_3", "road_2_16_3", "road_2_15_3", "road_2_14_3", "road_2_13_3", "road_2_12_3", "road_2_11_2", "road_1_11_2"], "interval": 1.0, "startTime": 122, "endTime": 122},
{"vehicle": {"length": 5.0, "width": 2.0, "maxPosAcc": 2.0, "maxNegAcc": 4.5, "usualPosAcc": 2.0, "usualNegAcc": 4.5, "minGap": 2.5, "maxSpeed": 11.111, "headwayTime": 2}, "route": ["road_8_24_2", "road_7_24_3", "road_7_23_2", "road_6_23_2", "road_5_23_2", "road_4_23_2", "road_3_23_2", "road_2_23_3", "road_2_22_3", "road_2_21_3", "road_2_20_3", "road_2_19_2", "road_1_19_2"], "interval": 1.0, "startTime": 122, "endTime": 122},
{"vehicle": {"length": 5.0, "width": 2.0, "maxPosAcc": 2.0, "maxNegAcc": 4.5, "usualPosAcc": 2.0, "usualNegAcc": 4.5, "minGap": 2.5, "maxSpeed": 11.111, "headwayTime": 2}, "route": ["road_0_24_0", "road_1_24_0", "road_2_24_0", "road_3_24_0", "road_4_24_0", "road_5_24_0", "road_6_24_0", "road_7_24_3", "road_7_23_3", "road_7_22_0"], "interval": 1.0, "startTime": 122, "endTime": 122},
{"vehicle": {"length": 5.0, "width": 2.0, "maxPosAcc": 2.0, "maxNegAcc": 4.5, "usualPosAcc": 2.0, "usualNegAcc": 4.5, "minGap": 2.5, "maxSpeed": 11.111, "headwayTime": 2}, "route": ["road_0_8_0", "road_1_8_1", "road_1_9_1", "road_1_10_1", "road_1_11_1", "road_1_12_1", "road_1_13_1", "road_1_14_2"], "interval": 1.0, "startTime": 122, "endTime": 122},
{"vehicle": {"length": 5.0, "width": 2.0, "maxPosAcc": 2.0, "maxNegAcc": 4.5, "usualPosAcc": 2.0, "usualNegAcc": 4.5, "minGap": 2.5, "maxSpeed": 11.111, "headwayTime": 2}, "route": ["road_1_0_1", "road_1_1_1", "road_1_2_1", "road_1_3_1", "road_1_4_1", "road_1_5_1", "road_1_6_1", "road_1_7_1", "road_1_8_1", "road_1_9_2"], "interval": 1.0, "startTime": 122, "endTime": 122},
{"vehicle": {"length": 5.0, "width": 2.0, "maxPosAcc": 2.0, "maxNegAcc": 4.5, "usualPosAcc": 2.0, "usualNegAcc": 4.5, "minGap": 2.5, "maxSpeed": 11.111, "headwayTime": 2}, "route": ["road_2_0_1", "road_2_1_2", "road_1_1_3"], "interval": 1.0, "startTime": 122, "endTime": 122},
{"vehicle": {"length": 5.0, "width": 2.0, "maxPosAcc": 2.0, "maxNegAcc": 4.5, "usualPosAcc": 2.0, "usualNegAcc": 4.5, "minGap": 2.5, "maxSpeed": 11.111, "headwayTime": 2}, "route": ["road_3_0_1", "road_3_1_2", "road_2_1_1", "road_2_2_0", "road_3_2_0", "road_4_2_0", "road_5_2_3", "road_5_1_2", "road_4_1_3"], "interval": 1.0, "startTime": 122, "endTime": 122},
{"vehicle": {"length": 5.0, "width": 2.0, "maxPosAcc": 2.0, "maxNegAcc": 4.5, "usualPosAcc": 2.0, "usualNegAcc": 4.5, "minGap": 2.5, "maxSpeed": 11.111, "headwayTime": 2}, "route": ["road_4_0_1", "road_4_1_2", "road_3_1_2", "road_2_1_2", "road_1_1_3"], "interval": 1.0, "startTime": 122, "endTime": 122},
{"vehicle": {"length": 5.0, "width": 2.0, "maxPosAcc": 2.0, "maxNegAcc": 4.5, "usualPosAcc": 2.0, "usualNegAcc": 4.5, "minGap": 2.5, "maxSpeed": 11.111, "headwayTime": 2}, "route": ["road_5_0_1", "road_5_1_2", "road_4_1_2", "road_3_1_2", "road_2_1_2", "road_1_1_3"], "interval": 1.0, "startTime": 122, "endTime": 122},
{"vehicle": {"length": 5.0, "width": 2.0, "maxPosAcc": 2.0, "maxNegAcc": 4.5, "usualPosAcc": 2.0, "usualNegAcc": 4.5, "minGap": 2.5, "maxSpeed": 11.111, "headwayTime": 2}, "route": ["road_6_0_1", "road_6_1_1", "road_6_2_1", "road_6_3_1", "road_6_4_1", "road_6_5_2", "road_5_5_2", "road_4_5_1", "road_4_6_1", "road_4_7_1", "road_4_8_1", "road_4_9_1", "road_4_10_1", "road_4_11_1", "road_4_12_1", "road_4_13_1", "road_4_14_1", "road_4_15_1", "road_4_16_1", "road_4_17_1", "road_4_18_1", "road_4_19_1", "road_4_20_1", "road_4_21_1", "road_4_22_1", "road_4_23_1", "road_4_24_1", "road_4_25_1", "road_4_26_1", "road_4_27_1", "road_4_28_0", "road_5_28_1"], "interval": 1.0, "startTime": 122, "endTime": 122},
{"vehicle": {"length": 5.0, "width": 2.0, "maxPosAcc": 2.0, "maxNegAcc": 4.5, "usualPosAcc": 2.0, "usualNegAcc": 4.5, "minGap": 2.5, "maxSpeed": 11.111, "headwayTime": 2}, "route": ["road_0_13_0", "road_1_13_1", "road_1_14_1", "road_1_15_1", "road_1_16_1", "road_1_17_1", "road_1_18_1", "road_1_19_1", "road_1_20_1", "road_1_21_1", "road_1_22_1", "road_1_23_1", "road_1_24_1", "road_1_25_1", "road_1_26_1", "road_1_27_1", "road_1_28_0", "road_2_28_1"], "interval": 1.0, "startTime": 122, "endTime": 122},
{"vehicle": {"length": 5.0, "width": 2.0, "maxPosAcc": 2.0, "maxNegAcc": 4.5, "usualPosAcc": 2.0, "usualNegAcc": 4.5, "minGap": 2.5, "maxSpeed": 11.111, "headwayTime": 2}, "route": ["road_0_2_0", "road_1_2_0", "road_2_2_3", "road_2_1_2", "road_1_1_3"], "interval": 1.0, "startTime": 122, "endTime": 122},
{"vehicle": {"length": 5.0, "width": 2.0, "maxPosAcc": 2.0, "maxNegAcc": 4.5, "usualPosAcc": 2.0, "usualNegAcc": 4.5, "minGap": 2.5, "maxSpeed": 11.111, "headwayTime": 2}, "route": ["road_0_22_0", "road_1_22_0", "road_2_22_3", "road_2_21_3", "road_2_20_3", "road_2_19_3", "road_2_18_3", "road_2_17_3", "road_2_16_3", "road_2_15_3", "road_2_14_3", "road_2_13_3", "road_2_12_3", "road_2_11_3", "road_2_10_3", "road_2_9_3", "road_2_8_3", "road_2_7_3", "road_2_6_3", "road_2_5_3", "road_2_4_3", "road_2_3_3", "road_2_2_3", "road_2_1_2", "road_1_1_3"], "interval": 1.0, "startTime": 122, "endTime": 122},
{"vehicle": {"length": 5.0, "width": 2.0, "maxPosAcc": 2.0, "maxNegAcc": 4.5, "usualPosAcc": 2.0, "usualNegAcc": 4.5, "minGap": 2.5, "maxSpeed": 11.111, "headwayTime": 2}, "route": ["road_0_10_0", "road_1_10_1", "road_1_11_1", "road_1_12_1", "road_1_13_1", "road_1_14_1", "road_1_15_1", "road_1_16_2"], "interval": 1.0, "startTime": 122, "endTime": 122},
{"vehicle": {"length": 5.0, "width": 2.0, "maxPosAcc": 2.0, "maxNegAcc": 4.5, "usualPosAcc": 2.0, "usualNegAcc": 4.5, "minGap": 2.5, "maxSpeed": 11.111, "headwayTime": 2}, "route": ["road_0_16_0", "road_1_16_0", "road_2_16_3", "road_2_15_3", "road_2_14_3", "road_2_13_3", "road_2_12_3", "road_2_11_3", "road_2_10_3", "road_2_9_3", "road_2_8_3", "road_2_7_3", "road_2_6_3", "road_2_5_3", "road_2_4_3", "road_2_3_3", "road_2_2_3", "road_2_1_2", "road_1_1_1", "road_1_2_1", "road_1_3_2"], "interval": 1.0, "startTime": 122, "endTime": 122},
{"vehicle": {"length": 5.0, "width": 2.0, "maxPosAcc": 2.0, "maxNegAcc": 4.5, "usualPosAcc": 2.0, "usualNegAcc": 4.5, "minGap": 2.5, "maxSpeed": 11.111, "headwayTime": 2}, "route": ["road_0_20_0", "road_1_20_0", "road_2_20_3", "road_2_19_3", "road_2_18_3", "road_2_17_3", "road_2_16_3", "road_2_15_3", "road_2_14_3", "road_2_13_3", "road_2_12_3", "road_2_11_3", "road_2_10_3", "road_2_9_3", "road_2_8_3", "road_2_7_3", "road_2_6_3", "road_2_5_3", "road_2_4_3", "road_2_3_3", "road_2_2_3", "road_2_1_3"], "interval": 1.0, "startTime": 122, "endTime": 122},
{"vehicle": {"length": 5.0, "width": 2.0, "maxPosAcc": 2.0, "maxNegAcc": 4.5, "usualPosAcc": 2.0, "usualNegAcc": 4.5, "minGap": 2.5, "maxSpeed": 11.111, "headwayTime": 2}, "route": ["road_5_29_3", "road_5_28_3", "road_5_27_3", "road_5_26_3", "road_5_25_2", "road_4_25_2", "road_3_25_2", "road_2_25_3", "road_2_24_3", "road_2_23_3", "road_2_22_3", "road_2_21_3", "road_2_20_3", "road_2_19_3", "road_2_18_3", "road_2_17_3", "road_2_16_3", "road_2_15_3", "road_2_14_3", "road_2_13_3", "road_2_12_3", "road_2_11_3", "road_2_10_3", "road_2_9_3", "road_2_8_3", "road_2_7_3", "road_2_6_3", "road_2_5_3", "road_2_4_3", "road_2_3_3", "road_2_2_3", "road_2_1_2", "road_1_1_3"], "interval": 1.0, "startTime": 122, "endTime": 122},
{"vehicle": {"length": 5.0, "width": 2.0, "maxPosAcc": 2.0, "maxNegAcc": 4.5, "usualPosAcc": 2.0, "usualNegAcc": 4.5, "minGap": 2.5, "maxSpeed": 11.111, "headwayTime": 2}, "route": ["road_1_29_3", "road_1_28_0", "road_2_28_3", "road_2_27_3", "road_2_26_3", "road_2_25_3", "road_2_24_3", "road_2_23_3", "road_2_22_3", "road_2_21_3", "road_2_20_3", "road_2_19_3", "road_2_18_3", "road_2_17_3", "road_2_16_3", "road_2_15_2", "road_1_15_2"], "interval": 1.0, "startTime": 122, "endTime": 122},
{"vehicle": {"length": 5.0, "width": 2.0, "maxPosAcc": 2.0, "maxNegAcc": 4.5, "usualPosAcc": 2.0, "usualNegAcc": 4.5, "minGap": 2.5, "maxSpeed": 11.111, "headwayTime": 2}, "route": ["road_2_29_3", "road_2_28_0", "road_3_28_3", "road_3_27_2", "road_2_27_3", "road_2_26_3", "road_2_25_3", "road_2_24_3", "road_2_23_3", "road_2_22_3", "road_2_21_3", "road_2_20_3", "road_2_19_3", "road_2_18_3", "road_2_17_3", "road_2_16_3", "road_2_15_3", "road_2_14_3", "road_2_13_3", "road_2_12_3", "road_2_11_3", "road_2_10_3", "road_2_9_3", "road_2_8_3", "road_2_7_3", "road_2_6_3", "road_2_5_3", "road_2_4_3", "road_2_3_3", "road_2_2_3", "road_2_1_2", "road_1_1_3"], "interval": 1.0, "startTime": 122, "endTime": 122},
{"vehicle": {"length": 5.0, "width": 2.0, "maxPosAcc": 2.0, "maxNegAcc": 4.5, "usualPosAcc": 2.0, "usualNegAcc": 4.5, "minGap": 2.5, "maxSpeed": 11.111, "headwayTime": 2}, "route": ["road_3_29_3", "road_3_28_3", "road_3_27_2", "road_2_27_3", "road_2_26_3", "road_2_25_3", "road_2_24_3", "road_2_23_3", "road_2_22_3", "road_2_21_3", "road_2_20_3", "road_2_19_3", "road_2_18_3", "road_2_17_3", "road_2_16_3", "road_2_15_3", "road_2_14_3", "road_2_13_3", "road_2_12_3", "road_2_11_3", "road_2_10_3", "road_2_9_3", "road_2_8_3", "road_2_7_3", "road_2_6_3", "road_2_5_3", "road_2_4_3", "road_2_3_3", "road_2_2_3", "road_2_1_2", "road_1_1_3"], "interval": 1.0, "startTime": 122, "endTime": 122},
{"vehicle": {"length": 5.0, "width": 2.0, "maxPosAcc": 2.0, "maxNegAcc": 4.5, "usualPosAcc": 2.0, "usualNegAcc": 4.5, "minGap": 2.5, "maxSpeed": 11.111, "headwayTime": 2}, "route": ["road_4_29_3", "road_4_28_0", "road_5_28_3", "road_5_27_3", "road_5_26_3", "road_5_25_2", "road_4_25_2", "road_3_25_2", "road_2_25_3", "road_2_24_3", "road_2_23_3", "road_2_22_3", "road_2_21_3", "road_2_20_3", "road_2_19_3", "road_2_18_3", "road_2_17_3", "road_2_16_3", "road_2_15_3", "road_2_14_3", "road_2_13_3", "road_2_12_3", "road_2_11_3", "road_2_10_3", "road_2_9_3", "road_2_8_3", "road_2_7_3", "road_2_6_3", "road_2_5_3", "road_2_4_3", "road_2_3_3", "road_2_2_3", "road_2_1_2", "road_1_1_3"], "interval": 1.0, "startTime": 122, "endTime": 122},
{"vehicle": {"length": 5.0, "width": 2.0, "maxPosAcc": 2.0, "maxNegAcc": 4.5, "usualPosAcc": 2.0, "usualNegAcc": 4.5, "minGap": 2.5, "maxSpeed": 11.111, "headwayTime": 2}, "route": ["road_6_29_3", "road_6_28_0", "road_7_28_3", "road_7_27_2", "road_6_27_2", "road_5_27_3", "road_5_26_3", "road_5_25_2", "road_4_25_2", "road_3_25_2", "road_2_25_3", "road_2_24_3", "road_2_23_3", "road_2_22_3", "road_2_21_3", "road_2_20_3", "road_2_19_3", "road_2_18_3", "road_2_17_3", "road_2_16_3", "road_2_15_3", "road_2_14_3", "road_2_13_3", "road_2_12_3", "road_2_11_3", "road_2_10_3", "road_2_9_3", "road_2_8_3", "road_2_7_2", "road_1_7_2"], "interval": 1.0, "startTime": 122, "endTime": 122},
{"vehicle": {"length": 5.0, "width": 2.0, "maxPosAcc": 2.0, "maxNegAcc": 4.5, "usualPosAcc": 2.0, "usualNegAcc": 4.5, "minGap": 2.5, "maxSpeed": 11.111, "headwayTime": 2}, "route": ["road_0_26_0", "road_1_26_0", "road_2_26_0", "road_3_26_3", "road_3_25_3", "road_3_24_3", "road_3_23_3", "road_3_22_3", "road_3_21_3", "road_3_20_3", "road_3_19_3", "road_3_18_3", "road_3_17_3", "road_3_16_3", "road_3_15_3", "road_3_14_3", "road_3_13_3", "road_3_12_3", "road_3_11_3", "road_3_10_3", "road_3_9_3", "road_3_8_3", "road_3_7_3", "road_3_6_3", "road_3_5_3", "road_3_4_3", "road_3_3_3", "road_3_2_0", "road_4_2_0", "road_5_2_3", "road_5_1_2", "road_4_1_3"], "interval": 1.0, "startTime": 122, "endTime": 122},
{"vehicle": {"length": 5.0, "width": 2.0, "maxPosAcc": 2.0, "maxNegAcc": 4.5, "usualPosAcc": 2.0, "usualNegAcc": 4.5, "minGap": 2.5, "maxSpeed": 11.111, "headwayTime": 2}, "route": ["road_0_4_0", "road_1_4_1", "road_1_5_1", "road_1_6_1", "road_1_7_1", "road_1_8_1", "road_1_9_1", "road_1_10_1", "road_1_11_1", "road_1_12_1", "road_1_13_1", "road_1_14_1", "road_1_15_1", "road_1_16_1", "road_1_17_1", "road_1_18_1", "road_1_19_1", "road_1_20_1", "road_1_21_1", "road_1_22_2"], "interval": 1.0, "startTime": 122, "endTime": 122},
{"vehicle": {"length": 5.0, "width": 2.0, "maxPosAcc": 2.0, "maxNegAcc": 4.5, "usualPosAcc": 2.0, "usualNegAcc": 4.5, "minGap": 2.5, "maxSpeed": 11.111, "headwayTime": 2}, "route": ["road_0_14_0", "road_1_14_0", "road_2_14_3", "road_2_13_3", "road_2_12_3", "road_2_11_3", "road_2_10_3", "road_2_9_3", "road_2_8_3", "road_2_7_3", "road_2_6_3", "road_2_5_3", "road_2_4_3", "road_2_3_3", "road_2_2_0", "road_3_2_0", "road_4_2_0", "road_5_2_3", "road_5_1_2", "road_4_1_3"], "interval": 1.0, "startTime": 122, "endTime": 122},
{"vehicle": {"length": 5.0, "width": 2.0, "maxPosAcc": 2.0, "maxNegAcc": 4.5, "usualPosAcc": 2.0, "usualNegAcc": 4.5, "minGap": 2.5, "maxSpeed": 11.111, "headwayTime": 2}, "route": ["road_0_17_0", "road_1_17_0", "road_2_17_3", "road_2_16_3", "road_2_15_3", "road_2_14_3", "road_2_13_3", "road_2_12_3", "road_2_11_3", "road_2_10_3", "road_2_9_3", "road_2_8_3", "road_2_7_3", "road_2_6_3", "road_2_5_3", "road_2_4_3", "road_2_3_3", "road_2_2_3", "road_2_1_2", "road_1_1_3"], "interval": 1.0, "startTime": 122, "endTime": 122},
{"vehicle": {"length": 5.0, "width": 2.0, "maxPosAcc": 2.0, "maxNegAcc": 4.5, "usualPosAcc": 2.0, "usualNegAcc": 4.5, "minGap": 2.5, "maxSpeed": 11.111, "headwayTime": 2}, "route": ["road_0_19_0", "road_1_19_1", "road_1_20_0", "road_2_20_3", "road_2_19_3", "road_2_18_3", "road_2_17_3", "road_2_16_3", "road_2_15_3", "road_2_14_3", "road_2_13_3", "road_2_12_3", "road_2_11_3", "road_2_10_3", "road_2_9_3", "road_2_8_3", "road_2_7_3", "road_2_6_3", "road_2_5_3", "road_2_4_3", "road_2_3_3", "road_2_2_3", "road_2_1_2", "road_1_1_3"], "interval": 1.0, "startTime": 122, "endTime": 122},
{"vehicle": {"length": 5.0, "width": 2.0, "maxPosAcc": 2.0, "maxNegAcc": 4.5, "usualPosAcc": 2.0, "usualNegAcc": 4.5, "minGap": 2.5, "maxSpeed": 11.111, "headwayTime": 2}, "route": ["road_0_21_0", "road_1_21_1", "road_1_22_1", "road_1_23_1", "road_1_24_1", "road_1_25_1", "road_1_26_1", "road_1_27_1", "road_1_28_0", "road_2_28_1"], "interval": 1.0, "startTime": 122, "endTime": 122},
{"vehicle": {"length": 5.0, "width": 2.0, "maxPosAcc": 2.0, "maxNegAcc": 4.5, "usualPosAcc": 2.0, "usualNegAcc": 4.5, "minGap": 2.5, "maxSpeed": 11.111, "headwayTime": 2}, "route": ["road_0_25_0", "road_1_25_1", "road_1_26_0", "road_2_26_3", "road_2_25_3", "road_2_24_3", "road_2_23_3", "road_2_22_3", "road_2_21_3", "road_2_20_3", "road_2_19_3", "road_2_18_3", "road_2_17_3", "road_2_16_3", "road_2_15_3", "road_2_14_3", "road_2_13_3", "road_2_12_3", "road_2_11_3", "road_2_10_3", "road_2_9_3", "road_2_8_3", "road_2_7_3", "road_2_6_3", "road_2_5_3", "road_2_4_3", "road_2_3_3", "road_2_2_3", "road_2_1_2", "road_1_1_3"], "interval": 1.0, "startTime": 122, "endTime": 122},
{"vehicle": {"length": 5.0, "width": 2.0, "maxPosAcc": 2.0, "maxNegAcc": 4.5, "usualPosAcc": 2.0, "usualNegAcc": 4.5, "minGap": 2.5, "maxSpeed": 11.111, "headwayTime": 2}, "route": ["road_2_0_1", "road_2_1_2", "road_1_1_1", "road_1_2_1", "road_1_3_1", "road_1_4_1", "road_1_5_1", "road_1_6_1", "road_1_7_1", "road_1_8_1", "road_1_9_1", "road_1_10_1", "road_1_11_1", "road_1_12_1", "road_1_13_1", "road_1_14_1", "road_1_15_1", "road_1_16_1", "road_1_17_2"], "interval": 1.0, "startTime": 122, "endTime": 122},
{"vehicle": {"length": 5.0, "width": 2.0, "maxPosAcc": 2.0, "maxNegAcc": 4.5, "usualPosAcc": 2.0, "usualNegAcc": 4.5, "minGap": 2.5, "maxSpeed": 11.111, "headwayTime": 2}, "route": ["road_2_29_3", "road_2_28_0", "road_3_28_0", "road_4_28_0", "road_5_28_3", "road_5_27_3", "road_5_26_3", "road_5_25_3", "road_5_24_0", "road_6_24_0", "road_7_24_3", "road_7_23_0"], "interval": 1.0, "startTime": 122, "endTime": 122},
{"vehicle": {"length": 5.0, "width": 2.0, "maxPosAcc": 2.0, "maxNegAcc": 4.5, "usualPosAcc": 2.0, "usualNegAcc": 4.5, "minGap": 2.5, "maxSpeed": 11.111, "headwayTime": 2}, "route": ["road_0_20_0", "road_1_20_0", "road_2_20_3", "road_2_19_3", "road_2_18_3", "road_2_17_3", "road_2_16_3", "road_2_15_3", "road_2_14_3", "road_2_13_3", "road_2_12_3", "road_2_11_3", "road_2_10_3", "road_2_9_3", "road_2_8_3", "road_2_7_3", "road_2_6_3", "road_2_5_3", "road_2_4_3", "road_2_3_3", "road_2_2_3", "road_2_1_2", "road_1_1_3"], "interval": 1.0, "startTime": 123, "endTime": 123},
{"vehicle": {"length": 5.0, "width": 2.0, "maxPosAcc": 2.0, "maxNegAcc": 4.5, "usualPosAcc": 2.0, "usualNegAcc": 4.5, "minGap": 2.5, "maxSpeed": 11.111, "headwayTime": 2}, "route": ["road_1_0_1", "road_1_1_1", "road_1_2_0", "road_2_2_1", "road_2_3_1", "road_2_4_1", "road_2_5_1", "road_2_6_1", "road_2_7_1", "road_2_8_1", "road_2_9_1", "road_2_10_1", "road_2_11_1", "road_2_12_1", "road_2_13_1", "road_2_14_1", "road_2_15_1", "road_2_16_1", "road_2_17_1", "road_2_18_1", "road_2_19_1", "road_2_20_1", "road_2_21_1", "road_2_22_1", "road_2_23_1", "road_2_24_1", "road_2_25_1", "road_2_26_0", "road_3_26_0", "road_4_26_1", "road_4_27_1", "road_4_28_1"], "interval": 1.0, "startTime": 124, "endTime": 124},
{"vehicle": {"length": 5.0, "width": 2.0, "maxPosAcc": 2.0, "maxNegAcc": 4.5, "usualPosAcc": 2.0, "usualNegAcc": 4.5, "minGap": 2.5, "maxSpeed": 11.111, "headwayTime": 2}, "route": ["road_5_0_1", "road_5_1_2", "road_4_1_2", "road_3_1_2", "road_2_1_2", "road_1_1_3"], "interval": 1.0, "startTime": 124, "endTime": 124},
{"vehicle": {"length": 5.0, "width": 2.0, "maxPosAcc": 2.0, "maxNegAcc": 4.5, "usualPosAcc": 2.0, "usualNegAcc": 4.5, "minGap": 2.5, "maxSpeed": 11.111, "headwayTime": 2}, "route": ["road_5_29_3", "road_5_28_3", "road_5_27_3", "road_5_26_3", "road_5_25_2", "road_4_25_2", "road_3_25_2", "road_2_25_3", "road_2_24_3", "road_2_23_3", "road_2_22_3", "road_2_21_3", "road_2_20_3", "road_2_19_3", "road_2_18_3", "road_2_17_3", "road_2_16_3", "road_2_15_3", "road_2_14_3", "road_2_13_3", "road_2_12_3", "road_2_11_3", "road_2_10_3", "road_2_9_3", "road_2_8_3", "road_2_7_3", "road_2_6_3", "road_2_5_3", "road_2_4_3", "road_2_3_3", "road_2_2_3", "road_2_1_2", "road_1_1_3"], "interval": 1.0, "startTime": 125, "endTime": 125},
{"vehicle": {"length": 5.0, "width": 2.0, "maxPosAcc": 2.0, "maxNegAcc": 4.5, "usualPosAcc": 2.0, "usualNegAcc": 4.5, "minGap": 2.5, "maxSpeed": 11.111, "headwayTime": 2}, "route": ["road_8_16_2", "road_7_16_3", "road_7_15_2", "road_6_15_2", "road_5_15_2", "road_4_15_2", "road_3_15_2", "road_2_15_3", "road_2_14_3", "road_2_13_3", "road_2_12_3", "road_2_11_3", "road_2_10_3", "road_2_9_3", "road_2_8_3", "road_2_7_2", "road_1_7_1", "road_1_8_2"], "interval": 1.0, "startTime": 126, "endTime": 126},
{"vehicle": {"length": 5.0, "width": 2.0, "maxPosAcc": 2.0, "maxNegAcc": 4.5, "usualPosAcc": 2.0, "usualNegAcc": 4.5, "minGap": 2.5, "maxSpeed": 11.111, "headwayTime": 2}, "route": ["road_0_13_0", "road_1_13_1", "road_1_14_0", "road_2_14_0", "road_3_14_0", "road_4_14_0", "road_5_14_0", "road_6_14_0", "road_7_14_3", "road_7_13_3", "road_7_12_3", "road_7_11_0"], "interval": 1.0, "startTime": 127, "endTime": 127},
{"vehicle": {"length": 5.0, "width": 2.0, "maxPosAcc": 2.0, "maxNegAcc": 4.5, "usualPosAcc": 2.0, "usualNegAcc": 4.5, "minGap": 2.5, "maxSpeed": 11.111, "headwayTime": 2}, "route": ["road_1_29_3", "road_1_28_0", "road_2_28_3", "road_2_27_3", "road_2_26_3", "road_2_25_3", "road_2_24_3", "road_2_23_3", "road_2_22_3", "road_2_21_3", "road_2_20_3", "road_2_19_3", "road_2_18_3", "road_2_17_3", "road_2_16_3", "road_2_15_3", "road_2_14_3", "road_2_13_3", "road_2_12_3", "road_2_11_3", "road_2_10_3", "road_2_9_3", "road_2_8_3", "road_2_7_3", "road_2_6_3", "road_2_5_3", "road_2_4_3", "road_2_3_3", "road_2_2_3", "road_2_1_2", "road_1_1_1", "road_1_2_2"], "interval": 1.0, "startTime": 127, "endTime": 127},
{"vehicle": {"length": 5.0, "width": 2.0, "maxPosAcc": 2.0, "maxNegAcc": 4.5, "usualPosAcc": 2.0, "usualNegAcc": 4.5, "minGap": 2.5, "maxSpeed": 11.111, "headwayTime": 2}, "route": ["road_8_9_2", "road_7_9_1", "road_7_10_1", "road_7_11_1", "road_7_12_1", "road_7_13_1", "road_7_14_1", "road_7_15_1", "road_7_16_1", "road_7_17_1", "road_7_18_1", "road_7_19_1", "road_7_20_1", "road_7_21_1", "road_7_22_1", "road_7_23_1", "road_7_24_1", "road_7_25_1", "road_7_26_1", "road_7_27_1", "road_7_28_1"], "interval": 1.0, "startTime": 128, "endTime": 128},
{"vehicle": {"length": 5.0, "width": 2.0, "maxPosAcc": 2.0, "maxNegAcc": 4.5, "usualPosAcc": 2.0, "usualNegAcc": 4.5, "minGap": 2.5, "maxSpeed": 11.111, "headwayTime": 2}, "route": ["road_1_0_1", "road_1_1_1", "road_1_2_1", "road_1_3_1", "road_1_4_1", "road_1_5_1", "road_1_6_1", "road_1_7_1", "road_1_8_1", "road_1_9_1", "road_1_10_1", "road_1_11_2"], "interval": 1.0, "startTime": 128, "endTime": 128},
{"vehicle": {"length": 5.0, "width": 2.0, "maxPosAcc": 2.0, "maxNegAcc": 4.5, "usualPosAcc": 2.0, "usualNegAcc": 4.5, "minGap": 2.5, "maxSpeed": 11.111, "headwayTime": 2}, "route": ["road_3_0_1", "road_3_1_2", "road_2_1_2", "road_1_1_1", "road_1_2_1", "road_1_3_1", "road_1_4_1", "road_1_5_1", "road_1_6_1", "road_1_7_1", "road_1_8_1", "road_1_9_1", "road_1_10_1", "road_1_11_1", "road_1_12_1", "road_1_13_1", "road_1_14_1", "road_1_15_1", "road_1_16_2"], "interval": 1.0, "startTime": 128, "endTime": 128},
{"vehicle": {"length": 5.0, "width": 2.0, "maxPosAcc": 2.0, "maxNegAcc": 4.5, "usualPosAcc": 2.0, "usualNegAcc": 4.5, "minGap": 2.5, "maxSpeed": 11.111, "headwayTime": 2}, "route": ["road_5_0_1", "road_5_1_2", "road_4_1_2", "road_3_1_2", "road_2_1_2", "road_1_1_1", "road_1_2_1", "road_1_3_1", "road_1_4_1", "road_1_5_1", "road_1_6_2"], "interval": 1.0, "startTime": 128, "endTime": 128},
{"vehicle": {"length": 5.0, "width": 2.0, "maxPosAcc": 2.0, "maxNegAcc": 4.5, "usualPosAcc": 2.0, "usualNegAcc": 4.5, "minGap": 2.5, "maxSpeed": 11.111, "headwayTime": 2}, "route": ["road_0_18_0", "road_1_18_0", "road_2_18_3", "road_2_17_3", "road_2_16_3", "road_2_15_3", "road_2_14_3", "road_2_13_3", "road_2_12_3", "road_2_11_3", "road_2_10_2", "road_1_10_2"], "interval": 1.0, "startTime": 128, "endTime": 128},
{"vehicle": {"length": 5.0, "width": 2.0, "maxPosAcc": 2.0, "maxNegAcc": 4.5, "usualPosAcc": 2.0, "usualNegAcc": 4.5, "minGap": 2.5, "maxSpeed": 11.111, "headwayTime": 2}, "route": ["road_0_15_0", "road_1_15_1", "road_1_16_0", "road_2_16_3", "road_2_15_3", "road_2_14_3", "road_2_13_3", "road_2_12_3", "road_2_11_3", "road_2_10_3", "road_2_9_3", "road_2_8_3", "road_2_7_3", "road_2_6_3", "road_2_5_3", "road_2_4_3", "road_2_3_3", "road_2_2_0", "road_3_2_0", "road_4_2_0", "road_5_2_3", "road_5_1_2", "road_4_1_3"], "interval": 1.0, "startTime": 129, "endTime": 129},
{"vehicle": {"length": 5.0, "width": 2.0, "maxPosAcc": 2.0, "maxNegAcc": 4.5, "usualPosAcc": 2.0, "usualNegAcc": 4.5, "minGap": 2.5, "maxSpeed": 11.111, "headwayTime": 2}, "route": ["road_8_15_2", "road_7_15_2", "road_6_15_2", "road_5_15_2", "road_4_15_2", "road_3_15_2", "road_2_15_2", "road_1_15_1", "road_1_16_1", "road_1_17_1", "road_1_18_1", "road_1_19_1", "road_1_20_1", "road_1_21_1", "road_1_22_1", "road_1_23_1", "road_1_24_2"], "interval": 1.0, "startTime": 130, "endTime": 130},
{"vehicle": {"length": 5.0, "width": 2.0, "maxPosAcc": 2.0, "maxNegAcc": 4.5, "usualPosAcc": 2.0, "usualNegAcc": 4.5, "minGap": 2.5, "maxSpeed": 11.111, "headwayTime": 2}, "route": ["road_1_0_1", "road_1_1_1", "road_1_2_0", "road_2_2_3", "road_2_1_3"], "interval": 1.0, "startTime": 132, "endTime": 132},
{"vehicle": {"length": 5.0, "width": 2.0, "maxPosAcc": 2.0, "maxNegAcc": 4.5, "usualPosAcc": 2.0, "usualNegAcc": 4.5, "minGap": 2.5, "maxSpeed": 11.111, "headwayTime": 2}, "route": ["road_0_16_0", "road_1_16_1", "road_1_17_1", "road_1_18_1", "road_1_19_2"], "interval": 1.0, "startTime": 132, "endTime": 132},
{"vehicle": {"length": 5.0, "width": 2.0, "maxPosAcc": 2.0, "maxNegAcc": 4.5, "usualPosAcc": 2.0, "usualNegAcc": 4.5, "minGap": 2.5, "maxSpeed": 11.111, "headwayTime": 2}, "route": ["road_2_0_1", "road_2_1_2", "road_1_1_1", "road_1_2_1", "road_1_3_1", "road_1_4_1", "road_1_5_1", "road_1_6_1", "road_1_7_1", "road_1_8_1", "road_1_9_1", "road_1_10_1", "road_1_11_1", "road_1_12_1", "road_1_13_1", "road_1_14_1", "road_1_15_1", "road_1_16_1", "road_1_17_1", "road_1_18_1", "road_1_19_1", "road_1_20_1", "road_1_21_1", "road_1_22_1", "road_1_23_1", "road_1_24_2"], "interval": 1.0, "startTime": 133, "endTime": 133},
{"vehicle": {"length": 5.0, "width": 2.0, "maxPosAcc": 2.0, "maxNegAcc": 4.5, "usualPosAcc": 2.0, "usualNegAcc": 4.5, "minGap": 2.5, "maxSpeed": 11.111, "headwayTime": 2}, "route": ["road_2_29_3", "road_2_28_3", "road_2_27_3", "road_2_26_3", "road_2_25_3", "road_2_24_3", "road_2_23_3", "road_2_22_3", "road_2_21_3", "road_2_20_3", "road_2_19_2", "road_1_19_1", "road_1_20_2"], "interval": 1.0, "startTime": 134, "endTime": 134},
{"vehicle": {"length": 5.0, "width": 2.0, "maxPosAcc": 2.0, "maxNegAcc": 4.5, "usualPosAcc": 2.0, "usualNegAcc": 4.5, "minGap": 2.5, "maxSpeed": 11.111, "headwayTime": 2}, "route": ["road_4_0_1", "road_4_1_1", "road_4_2_0", "road_5_2_0", "road_6_2_0", "road_7_2_1", "road_7_3_1", "road_7_4_1", "road_7_5_1", "road_7_6_1", "road_7_7_1", "road_7_8_1", "road_7_9_1", "road_7_10_1", "road_7_11_1", "road_7_12_1", "road_7_13_1", "road_7_14_1", "road_7_15_1", "road_7_16_1", "road_7_17_1", "road_7_18_1", "road_7_19_1", "road_7_20_1", "road_7_21_1", "road_7_22_1", "road_7_23_1", "road_7_24_1", "road_7_25_0"], "interval": 1.0, "startTime": 136, "endTime": 136},
{"vehicle": {"length": 5.0, "width": 2.0, "maxPosAcc": 2.0, "maxNegAcc": 4.5, "usualPosAcc": 2.0, "usualNegAcc": 4.5, "minGap": 2.5, "maxSpeed": 11.111, "headwayTime": 2}, "route": ["road_2_0_1", "road_2_1_2", "road_1_1_1", "road_1_2_0", "road_2_2_0", "road_3_2_3", "road_3_1_2", "road_2_1_3"], "interval": 1.0, "startTime": 137, "endTime": 137},
{"vehicle": {"length": 5.0, "width": 2.0, "maxPosAcc": 2.0, "maxNegAcc": 4.5, "usualPosAcc": 2.0, "usualNegAcc": 4.5, "minGap": 2.5, "maxSpeed": 11.111, "headwayTime": 2}, "route": ["road_8_20_2", "road_7_20_3", "road_7_19_3", "road_7_18_3", "road_7_17_3", "road_7_16_3", "road_7_15_3", "road_7_14_3", "road_7_13_3", "road_7_12_3", "road_7_11_3", "road_7_10_2", "road_6_10_2", "road_5_10_2", "road_4_10_2", "road_3_10_2", "road_2_10_2", "road_1_10_2"], "interval": 1.0, "startTime": 138, "endTime": 138},
{"vehicle": {"length": 5.0, "width": 2.0, "maxPosAcc": 2.0, "maxNegAcc": 4.5, "usualPosAcc": 2.0, "usualNegAcc": 4.5, "minGap": 2.5, "maxSpeed": 11.111, "headwayTime": 2}, "route": ["road_5_0_1", "road_5_1_2", "road_4_1_2", "road_3_1_2", "road_2_1_2", "road_1_1_1", "road_1_2_2"], "interval": 1.0, "startTime": 138, "endTime": 138},
{"vehicle": {"length": 5.0, "width": 2.0, "maxPosAcc": 2.0, "maxNegAcc": 4.5, "usualPosAcc": 2.0, "usualNegAcc": 4.5, "minGap": 2.5, "maxSpeed": 11.111, "headwayTime": 2}, "route": ["road_2_0_1", "road_2_1_1", "road_2_2_0", "road_3_2_0", "road_4_2_0", "road_5_2_0", "road_6_2_0", "road_7_2_1", "road_7_3_1", "road_7_4_1", "road_7_5_1", "road_7_6_1", "road_7_7_1", "road_7_8_1", "road_7_9_1", "road_7_10_1", "road_7_11_1", "road_7_12_1", "road_7_13_1", "road_7_14_1", "road_7_15_1", "road_7_16_1", "road_7_17_1", "road_7_18_0"], "interval": 1.0, "startTime": 139, "endTime": 139},
{"vehicle": {"length": 5.0, "width": 2.0, "maxPosAcc": 2.0, "maxNegAcc": 4.5, "usualPosAcc": 2.0, "usualNegAcc": 4.5, "minGap": 2.5, "maxSpeed": 11.111, "headwayTime": 2}, "route": ["road_6_0_1", "road_6_1_1", "road_6_2_1", "road_6_3_1", "road_6_4_1", "road_6_5_2", "road_5_5_2", "road_4_5_2", "road_3_5_2", "road_2_5_2", "road_1_5_1", "road_1_6_1", "road_1_7_1", "road_1_8_1", "road_1_9_1", "road_1_10_1", "road_1_11_1", "road_1_12_1", "road_1_13_1", "road_1_14_1", "road_1_15_1", "road_1_16_1", "road_1_17_1", "road_1_18_1", "road_1_19_2"], "interval": 1.0, "startTime": 141, "endTime": 141},
{"vehicle": {"length": 5.0, "width": 2.0, "maxPosAcc": 2.0, "maxNegAcc": 4.5, "usualPosAcc": 2.0, "usualNegAcc": 4.5, "minGap": 2.5, "maxSpeed": 11.111, "headwayTime": 2}, "route": ["road_0_6_0", "road_1_6_0", "road_2_6_0", "road_3_6_0", "road_4_6_0", "road_5_6_0", "road_6_6_0", "road_7_6_1", "road_7_7_1", "road_7_8_1", "road_7_9_1", "road_7_10_1", "road_7_11_0"], "interval": 1.0, "startTime": 141, "endTime": 141},
{"vehicle": {"length": 5.0, "width": 2.0, "maxPosAcc": 2.0, "maxNegAcc": 4.5, "usualPosAcc": 2.0, "usualNegAcc": 4.5, "minGap": 2.5, "maxSpeed": 11.111, "headwayTime": 2}, "route": ["road_5_29_3", "road_5_28_3", "road_5_27_3", "road_5_26_3", "road_5_25_3", "road_5_24_3", "road_5_23_3", "road_5_22_3", "road_5_21_3", "road_5_20_3", "road_5_19_3", "road_5_18_3", "road_5_17_3", "road_5_16_3", "road_5_15_3", "road_5_14_3", "road_5_13_3", "road_5_12_3", "road_5_11_3", "road_5_10_3", "road_5_9_3", "road_5_8_3", "road_5_7_3", "road_5_6_3", "road_5_5_3", "road_5_4_3", "road_5_3_3", "road_5_2_3", "road_5_1_2", "road_4_1_3"], "interval": 1.0, "startTime": 141, "endTime": 141},
{"vehicle": {"length": 5.0, "width": 2.0, "maxPosAcc": 2.0, "maxNegAcc": 4.5, "usualPosAcc": 2.0, "usualNegAcc": 4.5, "minGap": 2.5, "maxSpeed": 11.111, "headwayTime": 2}, "route": ["road_1_0_1", "road_1_1_1", "road_1_2_1", "road_1_3_2"], "interval": 1.0, "startTime": 142, "endTime": 142},
{"vehicle": {"length": 5.0, "width": 2.0, "maxPosAcc": 2.0, "maxNegAcc": 4.5, "usualPosAcc": 2.0, "usualNegAcc": 4.5, "minGap": 2.5, "maxSpeed": 11.111, "headwayTime": 2}, "route": ["road_3_0_1", "road_3_1_2", "road_2_1_2", "road_1_1_1", "road_1_2_1", "road_1_3_2"], "interval": 1.0, "startTime": 142, "endTime": 142},
{"vehicle": {"length": 5.0, "width": 2.0, "maxPosAcc": 2.0, "maxNegAcc": 4.5, "usualPosAcc": 2.0, "usualNegAcc": 4.5, "minGap": 2.5, "maxSpeed": 11.111, "headwayTime": 2}, "route": ["road_0_9_0", "road_1_9_1", "road_1_10_1", "road_1_11_1", "road_1_12_1", "road_1_13_1", "road_1_14_1", "road_1_15_1", "road_1_16_1", "road_1_17_1", "road_1_18_1", "road_1_19_1", "road_1_20_1", "road_1_21_1", "road_1_22_1", "road_1_23_1", "road_1_24_1", "road_1_25_1", "road_1_26_1", "road_1_27_1", "road_1_28_0", "road_2_28_1"], "interval": 1.0, "startTime": 142, "endTime": 142},
{"vehicle": {"length": 5.0, "width": 2.0, "maxPosAcc": 2.0, "maxNegAcc": 4.5, "usualPosAcc": 2.0, "usualNegAcc": 4.5, "minGap": 2.5, "maxSpeed": 11.111, "headwayTime": 2}, "route": ["road_8_5_2", "road_7_5_2", "road_6_5_2", "road_5_5_2", "road_4_5_2", "road_3_5_2", "road_2_5_2", "road_1_5_1", "road_1_6_1", "road_1_7_1", "road_1_8_1", "road_1_9_1", "road_1_10_2"], "interval": 1.0, "startTime": 143, "endTime": 143},
{"vehicle": {"length": 5.0, "width": 2.0, "maxPosAcc": 2.0, "maxNegAcc": 4.5, "usualPosAcc": 2.0, "usualNegAcc": 4.5, "minGap": 2.5, "maxSpeed": 11.111, "headwayTime": 2}, "route": ["road_8_10_2", "road_7_10_3", "road_7_9_0"], "interval": 1.0, "startTime": 143, "endTime": 143},
{"vehicle": {"length": 5.0, "width": 2.0, "maxPosAcc": 2.0, "maxNegAcc": 4.5, "usualPosAcc": 2.0, "usualNegAcc": 4.5, "minGap": 2.5, "maxSpeed": 11.111, "headwayTime": 2}, "route": ["road_3_0_1", "road_3_1_2", "road_2_1_1", "road_2_2_0", "road_3_2_0", "road_4_2_0", "road_5_2_0", "road_6_2_0", "road_7_2_1", "road_7_3_1", "road_7_4_1", "road_7_5_1", "road_7_6_1", "road_7_7_1", "road_7_8_1", "road_7_9_1", "road_7_10_1", "road_7_11_1", "road_7_12_1", "road_7_13_1", "road_7_14_1", "road_7_15_1", "road_7_16_1", "road_7_17_1", "road_7_18_1", "road_7_19_1", "road_7_20_1", "road_7_21_1", "road_7_22_1", "road_7_23_1", "road_7_24_0"], "interval": 1.0, "startTime": 143, "endTime": 143},
{"vehicle": {"length": 5.0, "width": 2.0, "maxPosAcc": 2.0, "maxNegAcc": 4.5, "usualPosAcc": 2.0, "usualNegAcc": 4.5, "minGap": 2.5, "maxSpeed": 11.111, "headwayTime": 2}, "route": ["road_0_7_0", "road_1_7_1", "road_1_8_1", "road_1_9_1", "road_1_10_1", "road_1_11_1", "road_1_12_1", "road_1_13_1", "road_1_14_1", "road_1_15_1", "road_1_16_1", "road_1_17_1", "road_1_18_1", "road_1_19_1", "road_1_20_1", "road_1_21_1", "road_1_22_1", "road_1_23_1", "road_1_24_1", "road_1_25_1", "road_1_26_1", "road_1_27_1", "road_1_28_1"], "interval": 1.0, "startTime": 143, "endTime": 143},
{"vehicle": {"length": 5.0, "width": 2.0, "maxPosAcc": 2.0, "maxNegAcc": 4.5, "usualPosAcc": 2.0, "usualNegAcc": 4.5, "minGap": 2.5, "maxSpeed": 11.111, "headwayTime": 2}, "route": ["road_0_25_0", "road_1_25_1", "road_1_26_0", "road_2_26_3", "road_2_25_3", "road_2_24_3", "road_2_23_3", "road_2_22_3", "road_2_21_3", "road_2_20_3", "road_2_19_3", "road_2_18_3", "road_2_17_3", "road_2_16_3", "road_2_15_3", "road_2_14_3", "road_2_13_3", "road_2_12_3", "road_2_11_2", "road_1_11_2"], "interval": 1.0, "startTime": 143, "endTime": 143},
{"vehicle": {"length": 5.0, "width": 2.0, "maxPosAcc": 2.0, "maxNegAcc": 4.5, "usualPosAcc": 2.0, "usualNegAcc": 4.5, "minGap": 2.5, "maxSpeed": 11.111, "headwayTime": 2}, "route": ["road_4_0_1", "road_4_1_2", "road_3_1_2", "road_2_1_2", "road_1_1_1", "road_1_2_1", "road_1_3_1", "road_1_4_1", "road_1_5_2"], "interval": 1.0, "startTime": 144, "endTime": 144},
{"vehicle": {"length": 5.0, "width": 2.0, "maxPosAcc": 2.0, "maxNegAcc": 4.5, "usualPosAcc": 2.0, "usualNegAcc": 4.5, "minGap": 2.5, "maxSpeed": 11.111, "headwayTime": 2}, "route": ["road_3_0_1", "road_3_1_2", "road_2_1_1", "road_2_2_0", "road_3_2_0", "road_4_2_0", "road_5_2_3", "road_5_1_2", "road_4_1_3"], "interval": 1.0, "startTime": 145, "endTime": 145},
{"vehicle": {"length": 5.0, "width": 2.0, "maxPosAcc": 2.0, "maxNegAcc": 4.5, "usualPosAcc": 2.0, "usualNegAcc": 4.5, "minGap": 2.5, "maxSpeed": 11.111, "headwayTime": 2}, "route": ["road_0_6_0", "road_1_6_1", "road_1_7_1", "road_1_8_0", "road_2_8_1", "road_2_9_1", "road_2_10_1", "road_2_11_1", "road_2_12_1", "road_2_13_1", "road_2_14_1", "road_2_15_1", "road_2_16_1", "road_2_17_1", "road_2_18_1", "road_2_19_1", "road_2_20_1", "road_2_21_1", "road_2_22_1", "road_2_23_1", "road_2_24_1", "road_2_25_1", "road_2_26_1", "road_2_27_1", "road_2_28_0", "road_3_28_1"], "interval": 1.0, "startTime": 145, "endTime": 145},
{"vehicle": {"length": 5.0, "width": 2.0, "maxPosAcc": 2.0, "maxNegAcc": 4.5, "usualPosAcc": 2.0, "usualNegAcc": 4.5, "minGap": 2.5, "maxSpeed": 11.111, "headwayTime": 2}, "route": ["road_0_22_0", "road_1_22_0", "road_2_22_0", "road_3_22_0", "road_4_22_0", "road_5_22_0", "road_6_22_0", "road_7_22_1", "road_7_23_1", "road_7_24_1", "road_7_25_1", "road_7_26_1", "road_7_27_0"], "interval": 1.0, "startTime": 145, "endTime": 145},
{"vehicle": {"length": 5.0, "width": 2.0, "maxPosAcc": 2.0, "maxNegAcc": 4.5, "usualPosAcc": 2.0, "usualNegAcc": 4.5, "minGap": 2.5, "maxSpeed": 11.111, "headwayTime": 2}, "route": ["road_0_3_0", "road_1_3_0", "road_2_3_3", "road_2_2_0", "road_3_2_0", "road_4_2_0", "road_5_2_3", "road_5_1_3"], "interval": 1.0, "startTime": 145, "endTime": 145},
{"vehicle": {"length": 5.0, "width": 2.0, "maxPosAcc": 2.0, "maxNegAcc": 4.5, "usualPosAcc": 2.0, "usualNegAcc": 4.5, "minGap": 2.5, "maxSpeed": 11.111, "headwayTime": 2}, "route": ["road_8_12_2", "road_7_12_3", "road_7_11_2", "road_6_11_2", "road_5_11_2", "road_4_11_2", "road_3_11_2", "road_2_11_3", "road_2_10_3", "road_2_9_3", "road_2_8_3", "road_2_7_3", "road_2_6_3", "road_2_5_2", "road_1_5_2"], "interval": 1.0, "startTime": 146, "endTime": 146},
{"vehicle": {"length": 5.0, "width": 2.0, "maxPosAcc": 2.0, "maxNegAcc": 4.5, "usualPosAcc": 2.0, "usualNegAcc": 4.5, "minGap": 2.5, "maxSpeed": 11.111, "headwayTime": 2}, "route": ["road_8_15_2", "road_7_15_3", "road_7_14_3", "road_7_13_3", "road_7_12_3", "road_7_11_3", "road_7_10_2", "road_6_10_2", "road_5_10_3", "road_5_9_3", "road_5_8_3", "road_5_7_3", "road_5_6_3", "road_5_5_3", "road_5_4_3", "road_5_3_3", "road_5_2_3", "road_5_1_3"], "interval": 1.0, "startTime": 146, "endTime": 146},
{"vehicle": {"length": 5.0, "width": 2.0, "maxPosAcc": 2.0, "maxNegAcc": 4.5, "usualPosAcc": 2.0, "usualNegAcc": 4.5, "minGap": 2.5, "maxSpeed": 11.111, "headwayTime": 2}, "route": ["road_1_0_1", "road_1_1_1", "road_1_2_0", "road_2_2_0", "road_3_2_3", "road_3_1_3"], "interval": 1.0, "startTime": 146, "endTime": 146},
{"vehicle": {"length": 5.0, "width": 2.0, "maxPosAcc": 2.0, "maxNegAcc": 4.5, "usualPosAcc": 2.0, "usualNegAcc": 4.5, "minGap": 2.5, "maxSpeed": 11.111, "headwayTime": 2}, "route": ["road_8_15_2", "road_7_15_2", "road_6_15_2", "road_5_15_2", "road_4_15_2", "road_3_15_2", "road_2_15_2", "road_1_15_1", "road_1_16_1", "road_1_17_1", "road_1_18_2"], "interval": 1.0, "startTime": 147, "endTime": 147},
{"vehicle": {"length": 5.0, "width": 2.0, "maxPosAcc": 2.0, "maxNegAcc": 4.5, "usualPosAcc": 2.0, "usualNegAcc": 4.5, "minGap": 2.5, "maxSpeed": 11.111, "headwayTime": 2}, "route": ["road_1_0_1", "road_1_1_1", "road_1_2_2"], "interval": 1.0, "startTime": 147, "endTime": 147},
{"vehicle": {"length": 5.0, "width": 2.0, "maxPosAcc": 2.0, "maxNegAcc": 4.5, "usualPosAcc": 2.0, "usualNegAcc": 4.5, "minGap": 2.5, "maxSpeed": 11.111, "headwayTime": 2}, "route": ["road_5_0_1", "road_5_1_2", "road_4_1_2", "road_3_1_2", "road_2_1_2", "road_1_1_3"], "interval": 1.0, "startTime": 147, "endTime": 147},
{"vehicle": {"length": 5.0, "width": 2.0, "maxPosAcc": 2.0, "maxNegAcc": 4.5, "usualPosAcc": 2.0, "usualNegAcc": 4.5, "minGap": 2.5, "maxSpeed": 11.111, "headwayTime": 2}, "route": ["road_8_9_2", "road_7_9_1", "road_7_10_1", "road_7_11_1", "road_7_12_1", "road_7_13_0"], "interval": 1.0, "startTime": 148, "endTime": 148},
{"vehicle": {"length": 5.0, "width": 2.0, "maxPosAcc": 2.0, "maxNegAcc": 4.5, "usualPosAcc": 2.0, "usualNegAcc": 4.5, "minGap": 2.5, "maxSpeed": 11.111, "headwayTime": 2}, "route": ["road_3_0_1", "road_3_1_2", "road_2_1_2", "road_1_1_3"], "interval": 1.0, "startTime": 148, "endTime": 148},
{"vehicle": {"length": 5.0, "width": 2.0, "maxPosAcc": 2.0, "maxNegAcc": 4.5, "usualPosAcc": 2.0, "usualNegAcc": 4.5, "minGap": 2.5, "maxSpeed": 11.111, "headwayTime": 2}, "route": ["road_8_7_2", "road_7_7_1", "road_7_8_1", "road_7_9_1", "road_7_10_1", "road_7_11_1", "road_7_12_0"], "interval": 1.0, "startTime": 149, "endTime": 149},
{"vehicle": {"length": 5.0, "width": 2.0, "maxPosAcc": 2.0, "maxNegAcc": 4.5, "usualPosAcc": 2.0, "usualNegAcc": 4.5, "minGap": 2.5, "maxSpeed": 11.111, "headwayTime": 2}, "route": ["road_1_0_1", "road_1_1_1", "road_1_2_1", "road_1_3_1", "road_1_4_1", "road_1_5_1", "road_1_6_1", "road_1_7_1", "road_1_8_1", "road_1_9_1", "road_1_10_2"], "interval": 1.0, "startTime": 149, "endTime": 149},
{"vehicle": {"length": 5.0, "width": 2.0, "maxPosAcc": 2.0, "maxNegAcc": 4.5, "usualPosAcc": 2.0, "usualNegAcc": 4.5, "minGap": 2.5, "maxSpeed": 11.111, "headwayTime": 2}, "route": ["road_0_12_0", "road_1_12_0", "road_2_12_3", "road_2_11_3", "road_2_10_3", "road_2_9_3", "road_2_8_3", "road_2_7_3", "road_2_6_3", "road_2_5_3", "road_2_4_3", "road_2_3_3", "road_2_2_3", "road_2_1_2", "road_1_1_3"], "interval": 1.0, "startTime": 149, "endTime": 149},
{"vehicle": {"length": 5.0, "width": 2.0, "maxPosAcc": 2.0, "maxNegAcc": 4.5, "usualPosAcc": 2.0, "usualNegAcc": 4.5, "minGap": 2.5, "maxSpeed": 11.111, "headwayTime": 2}, "route": ["road_2_29_3", "road_2_28_0", "road_3_28_3", "road_3_27_3", "road_3_26_3", "road_3_25_3", "road_3_24_3", "road_3_23_3", "road_3_22_3", "road_3_21_3", "road_3_20_3", "road_3_19_3", "road_3_18_3", "road_3_17_3", "road_3_16_3", "road_3_15_3", "road_3_14_3", "road_3_13_3", "road_3_12_3", "road_3_11_3", "road_3_10_3", "road_3_9_3", "road_3_8_3", "road_3_7_3", "road_3_6_3", "road_3_5_3", "road_3_4_3", "road_3_3_3", "road_3_2_3", "road_3_1_2", "road_2_1_3"], "interval": 1.0, "startTime": 150, "endTime": 150},
{"vehicle": {"length": 5.0, "width": 2.0, "maxPosAcc": 2.0, "maxNegAcc": 4.5, "usualPosAcc": 2.0, "usualNegAcc": 4.5, "minGap": 2.5, "maxSpeed": 11.111, "headwayTime": 2}, "route": ["road_8_13_2", "road_7_13_2", "road_6_13_2", "road_5_13_3", "road_5_12_3", "road_5_11_3", "road_5_10_2", "road_4_10_2", "road_3_10_3", "road_3_9_3", "road_3_8_3", "road_3_7_3", "road_3_6_3", "road_3_5_3", "road_3_4_3", "road_3_3_3", "road_3_2_3", "road_3_1_2", "road_2_1_2", "road_1_1_1", "road_1_2_2"], "interval": 1.0, "startTime": 151, "endTime": 151},
{"vehicle": {"length": 5.0, "width": 2.0, "maxPosAcc": 2.0, "maxNegAcc": 4.5, "usualPosAcc": 2.0, "usualNegAcc": 4.5, "minGap": 2.5, "maxSpeed": 11.111, "headwayTime": 2}, "route": ["road_0_22_0", "road_1_22_0", "road_2_22_3", "road_2_21_3", "road_2_20_3", "road_2_19_2", "road_1_19_2"], "interval": 1.0, "startTime": 151, "endTime": 151},
{"vehicle": {"length": 5.0, "width": 2.0, "maxPosAcc": 2.0, "maxNegAcc": 4.5, "usualPosAcc": 2.0, "usualNegAcc": 4.5, "minGap": 2.5, "maxSpeed": 11.111, "headwayTime": 2}, "route": ["road_0_20_0", "road_1_20_0", "road_2_20_1", "road_2_21_1", "road_2_22_1", "road_2_23_1", "road_2_24_1", "road_2_25_1", "road_2_26_0", "road_3_26_0", "road_4_26_1", "road_4_27_1", "road_4_28_1"], "interval": 1.0, "startTime": 151, "endTime": 151},
{"vehicle": {"length": 5.0, "width": 2.0, "maxPosAcc": 2.0, "maxNegAcc": 4.5, "usualPosAcc": 2.0, "usualNegAcc": 4.5, "minGap": 2.5, "maxSpeed": 11.111, "headwayTime": 2}, "route": ["road_1_0_1", "road_1_1_1", "road_1_2_1", "road_1_3_1", "road_1_4_1", "road_1_5_1", "road_1_6_1", "road_1_7_1", "road_1_8_1", "road_1_9_1", "road_1_10_1", "road_1_11_1", "road_1_12_1", "road_1_13_1", "road_1_14_1", "road_1_15_1", "road_1_16_2"], "interval": 1.0, "startTime": 152, "endTime": 152},
{"vehicle": {"length": 5.0, "width": 2.0, "maxPosAcc": 2.0, "maxNegAcc": 4.5, "usualPosAcc": 2.0, "usualNegAcc": 4.5, "minGap": 2.5, "maxSpeed": 11.111, "headwayTime": 2}, "route": ["road_8_15_2", "road_7_15_1", "road_7_16_1", "road_7_17_1", "road_7_18_1", "road_7_19_1", "road_7_20_1", "road_7_21_1", "road_7_22_0"], "interval": 1.0, "startTime": 153, "endTime": 153},
{"vehicle": {"length": 5.0, "width": 2.0, "maxPosAcc": 2.0, "maxNegAcc": 4.5, "usualPosAcc": 2.0, "usualNegAcc": 4.5, "minGap": 2.5, "maxSpeed": 11.111, "headwayTime": 2}, "route": ["road_0_3_0", "road_1_3_1", "road_1_4_1", "road_1_5_1", "road_1_6_1", "road_1_7_2"], "interval": 1.0, "startTime": 153, "endTime": 153},
{"vehicle": {"length": 5.0, "width": 2.0, "maxPosAcc": 2.0, "maxNegAcc": 4.5, "usualPosAcc": 2.0, "usualNegAcc": 4.5, "minGap": 2.5, "maxSpeed": 11.111, "headwayTime": 2}, "route": ["road_8_16_2", "road_7_16_1", "road_7_17_2", "road_6_17_2", "road_5_17_2", "road_4_17_2", "road_3_17_2", "road_2_17_2", "road_1_17_1", "road_1_18_1", "road_1_19_1", "road_1_20_1", "road_1_21_1", "road_1_22_1", "road_1_23_1", "road_1_24_1", "road_1_25_1", "road_1_26_1", "road_1_27_1", "road_1_28_1"], "interval": 1.0, "startTime": 154, "endTime": 154},
{"vehicle": {"length": 5.0, "width": 2.0, "maxPosAcc": 2.0, "maxNegAcc": 4.5, "usualPosAcc": 2.0, "usualNegAcc": 4.5, "minGap": 2.5, "maxSpeed": 11.111, "headwayTime": 2}, "route": ["road_4_0_1", "road_4_1_2", "road_3_1_3"], "interval": 1.0, "startTime": 154, "endTime": 154},
{"vehicle": {"length": 5.0, "width": 2.0, "maxPosAcc": 2.0, "maxNegAcc": 4.5, "usualPosAcc": 2.0, "usualNegAcc": 4.5, "minGap": 2.5, "maxSpeed": 11.111, "headwayTime": 2}, "route": ["road_0_15_0", "road_1_15_1", "road_1_16_0", "road_2_16_3", "road_2_15_3", "road_2_14_3", "road_2_13_3", "road_2_12_3", "road_2_11_3", "road_2_10_3", "road_2_9_3", "road_2_8_3", "road_2_7_3", "road_2_6_3", "road_2_5_3", "road_2_4_3", "road_2_3_3", "road_2_2_3", "road_2_1_2", "road_1_1_3"], "interval": 1.0, "startTime": 154, "endTime": 154},
{"vehicle": {"length": 5.0, "width": 2.0, "maxPosAcc": 2.0, "maxNegAcc": 4.5, "usualPosAcc": 2.0, "usualNegAcc": 4.5, "minGap": 2.5, "maxSpeed": 11.111, "headwayTime": 2}, "route": ["road_7_0_1", "road_7_1_1", "road_7_2_1", "road_7_3_1", "road_7_4_1", "road_7_5_1", "road_7_6_1", "road_7_7_1", "road_7_8_1", "road_7_9_1", "road_7_10_1", "road_7_11_1", "road_7_12_1", "road_7_13_1", "road_7_14_1", "road_7_15_1", "road_7_16_1", "road_7_17_1", "road_7_18_1", "road_7_19_1", "road_7_20_0"], "interval": 1.0, "startTime": 155, "endTime": 155},
{"vehicle": {"length": 5.0, "width": 2.0, "maxPosAcc": 2.0, "maxNegAcc": 4.5, "usualPosAcc": 2.0, "usualNegAcc": 4.5, "minGap": 2.5, "maxSpeed": 11.111, "headwayTime": 2}, "route": ["road_1_0_1", "road_1_1_1", "road_1_2_1", "road_1_3_1", "road_1_4_1", "road_1_5_1", "road_1_6_1", "road_1_7_1", "road_1_8_1", "road_1_9_1", "road_1_10_1", "road_1_11_1", "road_1_12_1", "road_1_13_1", "road_1_14_1", "road_1_15_1", "road_1_16_1", "road_1_17_1", "road_1_18_1", "road_1_19_1", "road_1_20_1", "road_1_21_1", "road_1_22_1", "road_1_23_1", "road_1_24_1", "road_1_25_1", "road_1_26_1", "road_1_27_1", "road_1_28_0", "road_2_28_1"], "interval": 1.0, "startTime": 155, "endTime": 155},
{"vehicle": {"length": 5.0, "width": 2.0, "maxPosAcc": 2.0, "maxNegAcc": 4.5, "usualPosAcc": 2.0, "usualNegAcc": 4.5, "minGap": 2.5, "maxSpeed": 11.111, "headwayTime": 2}, "route": ["road_0_16_0", "road_1_16_0", "road_2_16_3", "road_2_15_3", "road_2_14_3", "road_2_13_3", "road_2_12_3", "road_2_11_3", "road_2_10_3", "road_2_9_3", "road_2_8_3", "road_2_7_3", "road_2_6_3", "road_2_5_2", "road_1_5_2"], "interval": 1.0, "startTime": 155, "endTime": 155},
{"vehicle": {"length": 5.0, "width": 2.0, "maxPosAcc": 2.0, "maxNegAcc": 4.5, "usualPosAcc": 2.0, "usualNegAcc": 4.5, "minGap": 2.5, "maxSpeed": 11.111, "headwayTime": 2}, "route": ["road_0_20_0", "road_1_20_0", "road_2_20_1", "road_2_21_1", "road_2_22_1", "road_2_23_1", "road_2_24_1", "road_2_25_1", "road_2_26_0", "road_3_26_0", "road_4_26_1", "road_4_27_1", "road_4_28_1"], "interval": 1.0, "startTime": 156, "endTime": 156},
{"vehicle": {"length": 5.0, "width": 2.0, "maxPosAcc": 2.0, "maxNegAcc": 4.5, "usualPosAcc": 2.0, "usualNegAcc": 4.5, "minGap": 2.5, "maxSpeed": 11.111, "headwayTime": 2}, "route": ["road_0_14_0", "road_1_14_1", "road_1_15_1", "road_1_16_1", "road_1_17_1", "road_1_18_1", "road_1_19_1", "road_1_20_1", "road_1_21_1", "road_1_22_1", "road_1_23_1", "road_1_24_1", "road_1_25_1", "road_1_26_1", "road_1_27_1", "road_1_28_0", "road_2_28_1"], "interval": 1.0, "startTime": 157, "endTime": 157},
{"vehicle": {"length": 5.0, "width": 2.0, "maxPosAcc": 2.0, "maxNegAcc": 4.5, "usualPosAcc": 2.0, "usualNegAcc": 4.5, "minGap": 2.5, "maxSpeed": 11.111, "headwayTime": 2}, "route": ["road_0_19_0", "road_1_19_1", "road_1_20_0", "road_2_20_3", "road_2_19_3", "road_2_18_3", "road_2_17_3", "road_2_16_3", "road_2_15_3", "road_2_14_3", "road_2_13_3", "road_2_12_3", "road_2_11_3", "road_2_10_3", "road_2_9_3", "road_2_8_3", "road_2_7_3", "road_2_6_3", "road_2_5_3", "road_2_4_3", "road_2_3_3", "road_2_2_3", "road_2_1_3"], "interval": 1.0, "startTime": 157, "endTime": 157},
{"vehicle": {"length": 5.0, "width": 2.0, "maxPosAcc": 2.0, "maxNegAcc": 4.5, "usualPosAcc": 2.0, "usualNegAcc": 4.5, "minGap": 2.5, "maxSpeed": 11.111, "headwayTime": 2}, "route": ["road_7_29_3", "road_7_28_3", "road_7_27_2", "road_6_27_2", "road_5_27_3", "road_5_26_3", "road_5_25_2", "road_4_25_2", "road_3_25_2", "road_2_25_3", "road_2_24_3", "road_2_23_3", "road_2_22_3", "road_2_21_3", "road_2_20_3", "road_2_19_3", "road_2_18_3", "road_2_17_3", "road_2_16_3", "road_2_15_3", "road_2_14_3", "road_2_13_3", "road_2_12_3", "road_2_11_2", "road_1_11_2"], "interval": 1.0, "startTime": 158, "endTime": 158},
{"vehicle": {"length": 5.0, "width": 2.0, "maxPosAcc": 2.0, "maxNegAcc": 4.5, "usualPosAcc": 2.0, "usualNegAcc": 4.5, "minGap": 2.5, "maxSpeed": 11.111, "headwayTime": 2}, "route": ["road_0_16_0", "road_1_16_0", "road_2_16_0", "road_3_16_0", "road_4_16_0", "road_5_16_0", "road_6_16_0", "road_7_16_3", "road_7_15_3", "road_7_14_3", "road_7_13_3", "road_7_12_3", "road_7_11_3", "road_7_10_3", "road_7_9_0"], "interval": 1.0, "startTime": 158, "endTime": 158},
{"vehicle": {"length": 5.0, "width": 2.0, "maxPosAcc": 2.0, "maxNegAcc": 4.5, "usualPosAcc": 2.0, "usualNegAcc": 4.5, "minGap": 2.5, "maxSpeed": 11.111, "headwayTime": 2}, "route": ["road_7_0_1", "road_7_1_2", "road_6_1_2", "road_5_1_2", "road_4_1_2", "road_3_1_2", "road_2_1_2", "road_1_1_1", "road_1_2_1", "road_1_3_1", "road_1_4_2"], "interval": 1.0, "startTime": 159, "endTime": 159},
{"vehicle": {"length": 5.0, "width": 2.0, "maxPosAcc": 2.0, "maxNegAcc": 4.5, "usualPosAcc": 2.0, "usualNegAcc": 4.5, "minGap": 2.5, "maxSpeed": 11.111, "headwayTime": 2}, "route": ["road_1_0_1", "road_1_1_1", "road_1_2_0", "road_2_2_0", "road_3_2_3", "road_3_1_2", "road_2_1_3"], "interval": 1.0, "startTime": 159, "endTime": 159},
{"vehicle": {"length": 5.0, "width": 2.0, "maxPosAcc": 2.0, "maxNegAcc": 4.5, "usualPosAcc": 2.0, "usualNegAcc": 4.5, "minGap": 2.5, "maxSpeed": 11.111, "headwayTime": 2}, "route": ["road_6_0_1", "road_6_1_1", "road_6_2_0", "road_7_2_1", "road_7_3_1", "road_7_4_1", "road_7_5_1", "road_7_6_0"], "interval": 1.0, "startTime": 159, "endTime": 159},
{"vehicle": {"length": 5.0, "width": 2.0, "maxPosAcc": 2.0, "maxNegAcc": 4.5, "usualPosAcc": 2.0, "usualNegAcc": 4.5, "minGap": 2.5, "maxSpeed": 11.111, "headwayTime": 2}, "route": ["road_8_16_2", "road_7_16_3", "road_7_15_2", "road_6_15_2", "road_5_15_2", "road_4_15_2", "road_3_15_2", "road_2_15_3", "road_2_14_3", "road_2_13_3", "road_2_12_3", "road_2_11_3", "road_2_10_2", "road_1_10_2"], "interval": 1.0, "startTime": 160, "endTime": 160},
{"vehicle": {"length": 5.0, "width": 2.0, "maxPosAcc": 2.0, "maxNegAcc": 4.5, "usualPosAcc": 2.0, "usualNegAcc": 4.5, "minGap": 2.5, "maxSpeed": 11.111, "headwayTime": 2}, "route": ["road_0_10_0", "road_1_10_0", "road_2_10_3", "road_2_9_3", "road_2_8_3", "road_2_7_3", "road_2_6_3", "road_2_5_3", "road_2_4_2", "road_1_4_2"], "interval": 1.0, "startTime": 160, "endTime": 160},
{"vehicle": {"length": 5.0, "width": 2.0, "maxPosAcc": 2.0, "maxNegAcc": 4.5, "usualPosAcc": 2.0, "usualNegAcc": 4.5, "minGap": 2.5, "maxSpeed": 11.111, "headwayTime": 2}, "route": ["road_0_25_0", "road_1_25_1", "road_1_26_0", "road_2_26_0", "road_3_26_0", "road_4_26_0", "road_5_26_0", "road_6_26_0", "road_7_26_3", "road_7_25_0"], "interval": 1.0, "startTime": 160, "endTime": 160},
{"vehicle": {"length": 5.0, "width": 2.0, "maxPosAcc": 2.0, "maxNegAcc": 4.5, "usualPosAcc": 2.0, "usualNegAcc": 4.5, "minGap": 2.5, "maxSpeed": 11.111, "headwayTime": 2}, "route": ["road_0_8_0", "road_1_8_0", "road_2_8_3", "road_2_7_3", "road_2_6_3", "road_2_5_3", "road_2_4_3", "road_2_3_3", "road_2_2_3", "road_2_1_2", "road_1_1_3"], "interval": 1.0, "startTime": 161, "endTime": 161},
{"vehicle": {"length": 5.0, "width": 2.0, "maxPosAcc": 2.0, "maxNegAcc": 4.5, "usualPosAcc": 2.0, "usualNegAcc": 4.5, "minGap": 2.5, "maxSpeed": 11.111, "headwayTime": 2}, "route": ["road_1_29_3", "road_1_28_0", "road_2_28_1"], "interval": 1.0, "startTime": 161, "endTime": 161},
{"vehicle": {"length": 5.0, "width": 2.0, "maxPosAcc": 2.0, "maxNegAcc": 4.5, "usualPosAcc": 2.0, "usualNegAcc": 4.5, "minGap": 2.5, "maxSpeed": 11.111, "headwayTime": 2}, "route": ["road_1_0_1", "road_1_1_1", "road_1_2_1", "road_1_3_1", "road_1_4_1", "road_1_5_1", "road_1_6_1", "road_1_7_1", "road_1_8_2"], "interval": 1.0, "startTime": 162, "endTime": 162},
{"vehicle": {"length": 5.0, "width": 2.0, "maxPosAcc": 2.0, "maxNegAcc": 4.5, "usualPosAcc": 2.0, "usualNegAcc": 4.5, "minGap": 2.5, "maxSpeed": 11.111, "headwayTime": 2}, "route": ["road_0_9_0", "road_1_9_1", "road_1_10_0", "road_2_10_3", "road_2_9_3", "road_2_8_3", "road_2_7_3", "road_2_6_3", "road_2_5_3", "road_2_4_3", "road_2_3_3", "road_2_2_3", "road_2_1_2", "road_1_1_3"], "interval": 1.0, "startTime": 163, "endTime": 163},
{"vehicle": {"length": 5.0, "width": 2.0, "maxPosAcc": 2.0, "maxNegAcc": 4.5, "usualPosAcc": 2.0, "usualNegAcc": 4.5, "minGap": 2.5, "maxSpeed": 11.111, "headwayTime": 2}, "route": ["road_1_0_1", "road_1_1_1", "road_1_2_1", "road_1_3_1", "road_1_4_1", "road_1_5_1", "road_1_6_1", "road_1_7_1", "road_1_8_1", "road_1_9_1", "road_1_10_1", "road_1_11_1", "road_1_12_1", "road_1_13_1", "road_1_14_2"], "interval": 1.0, "startTime": 164, "endTime": 164},
{"vehicle": {"length": 5.0, "width": 2.0, "maxPosAcc": 2.0, "maxNegAcc": 4.5, "usualPosAcc": 2.0, "usualNegAcc": 4.5, "minGap": 2.5, "maxSpeed": 11.111, "headwayTime": 2}, "route": ["road_8_11_2", "road_7_11_2", "road_6_11_2", "road_5_11_2", "road_4_11_2", "road_3_11_3", "road_3_10_3", "road_3_9_3", "road_3_8_3", "road_3_7_3", "road_3_6_3", "road_3_5_3", "road_3_4_3", "road_3_3_3", "road_3_2_3", "road_3_1_2", "road_2_1_2", "road_1_1_3"], "interval": 1.0, "startTime": 166, "endTime": 166},
{"vehicle": {"length": 5.0, "width": 2.0, "maxPosAcc": 2.0, "maxNegAcc": 4.5, "usualPosAcc": 2.0, "usualNegAcc": 4.5, "minGap": 2.5, "maxSpeed": 11.111, "headwayTime": 2}, "route": ["road_8_22_2", "road_7_22_3", "road_7_21_2", "road_6_21_2", "road_5_21_2", "road_4_21_2", "road_3_21_2", "road_2_21_3", "road_2_20_3", "road_2_19_3", "road_2_18_3", "road_2_17_3", "road_2_16_3", "road_2_15_3", "road_2_14_3", "road_2_13_3", "road_2_12_3", "road_2_11_3", "road_2_10_2", "road_1_10_2"], "interval": 1.0, "startTime": 167, "endTime": 167},
{"vehicle": {"length": 5.0, "width": 2.0, "maxPosAcc": 2.0, "maxNegAcc": 4.5, "usualPosAcc": 2.0, "usualNegAcc": 4.5, "minGap": 2.5, "maxSpeed": 11.111, "headwayTime": 2}, "route": ["road_6_0_1", "road_6_1_2", "road_5_1_2", "road_4_1_2", "road_3_1_2", "road_2_1_2", "road_1_1_3"], "interval": 1.0, "startTime": 167, "endTime": 167},
{"vehicle": {"length": 5.0, "width": 2.0, "maxPosAcc": 2.0, "maxNegAcc": 4.5, "usualPosAcc": 2.0, "usualNegAcc": 4.5, "minGap": 2.5, "maxSpeed": 11.111, "headwayTime": 2}, "route": ["road_0_8_0", "road_1_8_0", "road_2_8_0", "road_3_8_0", "road_4_8_0", "road_5_8_0", "road_6_8_0", "road_7_8_1", "road_7_9_1", "road_7_10_0"], "interval": 1.0, "startTime": 168, "endTime": 168},
{"vehicle": {"length": 5.0, "width": 2.0, "maxPosAcc": 2.0, "maxNegAcc": 4.5, "usualPosAcc": 2.0, "usualNegAcc": 4.5, "minGap": 2.5, "maxSpeed": 11.111, "headwayTime": 2}, "route": ["road_1_0_1", "road_1_1_1", "road_1_2_1", "road_1_3_1", "road_1_4_1", "road_1_5_1", "road_1_6_1", "road_1_7_1", "road_1_8_1", "road_1_9_2"], "interval": 1.0, "startTime": 168, "endTime": 168},
{"vehicle": {"length": 5.0, "width": 2.0, "maxPosAcc": 2.0, "maxNegAcc": 4.5, "usualPosAcc": 2.0, "usualNegAcc": 4.5, "minGap": 2.5, "maxSpeed": 11.111, "headwayTime": 2}, "route": ["road_0_5_0", "road_1_5_1", "road_1_6_1", "road_1_7_1", "road_1_8_0", "road_2_8_0", "road_3_8_0", "road_4_8_0", "road_5_8_0", "road_6_8_0", "road_7_8_1", "road_7_9_1", "road_7_10_1", "road_7_11_1", "road_7_12_1", "road_7_13_1", "road_7_14_1", "road_7_15_1", "road_7_16_1", "road_7_17_1", "road_7_18_0"], "interval": 1.0, "startTime": 168, "endTime": 168},
{"vehicle": {"length": 5.0, "width": 2.0, "maxPosAcc": 2.0, "maxNegAcc": 4.5, "usualPosAcc": 2.0, "usualNegAcc": 4.5, "minGap": 2.5, "maxSpeed": 11.111, "headwayTime": 2}, "route": ["road_8_2_2", "road_7_2_1", "road_7_3_1", "road_7_4_1", "road_7_5_2", "road_6_5_2", "road_5_5_2", "road_4_5_2", "road_3_5_2", "road_2_5_2", "road_1_5_1", "road_1_6_1", "road_1_7_1", "road_1_8_1", "road_1_9_1", "road_1_10_1", "road_1_11_1", "road_1_12_1", "road_1_13_1", "road_1_14_1", "road_1_15_1", "road_1_16_1", "road_1_17_1", "road_1_18_2"], "interval": 1.0, "startTime": 169, "endTime": 169},
{"vehicle": {"length": 5.0, "width": 2.0, "maxPosAcc": 2.0, "maxNegAcc": 4.5, "usualPosAcc": 2.0, "usualNegAcc": 4.5, "minGap": 2.5, "maxSpeed": 11.111, "headwayTime": 2}, "route": ["road_8_7_2", "road_7_7_2", "road_6_7_2", "road_5_7_3", "road_5_6_3", "road_5_5_2", "road_4_5_2", "road_3_5_3", "road_3_4_3", "road_3_3_3", "road_3_2_3", "road_3_1_2", "road_2_1_2", "road_1_1_3"], "interval": 1.0, "startTime": 169, "endTime": 169},
{"vehicle": {"length": 5.0, "width": 2.0, "maxPosAcc": 2.0, "maxNegAcc": 4.5, "usualPosAcc": 2.0, "usualNegAcc": 4.5, "minGap": 2.5, "maxSpeed": 11.111, "headwayTime": 2}, "route": ["road_8_27_2", "road_7_27_2", "road_6_27_2", "road_5_27_3", "road_5_26_3", "road_5_25_2", "road_4_25_2", "road_3_25_3", "road_3_24_3", "road_3_23_3", "road_3_22_3", "road_3_21_3", "road_3_20_3", "road_3_19_3", "road_3_18_3", "road_3_17_3", "road_3_16_3", "road_3_15_3", "road_3_14_3", "road_3_13_3", "road_3_12_3", "road_3_11_3", "road_3_10_3", "road_3_9_3", "road_3_8_3", "road_3_7_3", "road_3_6_3", "road_3_5_3", "road_3_4_3", "road_3_3_3", "road_3_2_3", "road_3_1_3"], "interval": 1.0, "startTime": 169, "endTime": 169},
{"vehicle": {"length": 5.0, "width": 2.0, "maxPosAcc": 2.0, "maxNegAcc": 4.5, "usualPosAcc": 2.0, "usualNegAcc": 4.5, "minGap": 2.5, "maxSpeed": 11.111, "headwayTime": 2}, "route": ["road_0_24_0", "road_1_24_0", "road_2_24_3", "road_2_23_3", "road_2_22_3", "road_2_21_3", "road_2_20_3", "road_2_19_3", "road_2_18_3", "road_2_17_3", "road_2_16_3", "road_2_15_2", "road_1_15_1", "road_1_16_2"], "interval": 1.0, "startTime": 169, "endTime": 169},
{"vehicle": {"length": 5.0, "width": 2.0, "maxPosAcc": 2.0, "maxNegAcc": 4.5, "usualPosAcc": 2.0, "usualNegAcc": 4.5, "minGap": 2.5, "maxSpeed": 11.111, "headwayTime": 2}, "route": ["road_3_0_1", "road_3_1_2", "road_2_1_1", "road_2_2_0", "road_3_2_0", "road_4_2_0", "road_5_2_3", "road_5_1_3"], "interval": 1.0, "startTime": 169, "endTime": 169},
{"vehicle": {"length": 5.0, "width": 2.0, "maxPosAcc": 2.0, "maxNegAcc": 4.5, "usualPosAcc": 2.0, "usualNegAcc": 4.5, "minGap": 2.5, "maxSpeed": 11.111, "headwayTime": 2}, "route": ["road_8_10_2", "road_7_10_2", "road_6_10_2", "road_5_10_3", "road_5_9_2", "road_4_9_2", "road_3_9_3", "road_3_8_3", "road_3_7_3", "road_3_6_3", "road_3_5_3", "road_3_4_3", "road_3_3_3", "road_3_2_3", "road_3_1_2", "road_2_1_2", "road_1_1_3"], "interval": 1.0, "startTime": 170, "endTime": 170},
{"vehicle": {"length": 5.0, "width": 2.0, "maxPosAcc": 2.0, "maxNegAcc": 4.5, "usualPosAcc": 2.0, "usualNegAcc": 4.5, "minGap": 2.5, "maxSpeed": 11.111, "headwayTime": 2}, "route": ["road_3_0_1", "road_3_1_2", "road_2_1_2", "road_1_1_1", "road_1_2_1", "road_1_3_1", "road_1_4_1", "road_1_5_1", "road_1_6_1", "road_1_7_1", "road_1_8_1", "road_1_9_1", "road_1_10_1", "road_1_11_1", "road_1_12_1", "road_1_13_1", "road_1_14_2"], "interval": 1.0, "startTime": 171, "endTime": 171},
{"vehicle": {"length": 5.0, "width": 2.0, "maxPosAcc": 2.0, "maxNegAcc": 4.5, "usualPosAcc": 2.0, "usualNegAcc": 4.5, "minGap": 2.5, "maxSpeed": 11.111, "headwayTime": 2}, "route": ["road_1_0_1", "road_1_1_1", "road_1_2_0", "road_2_2_0", "road_3_2_0", "road_4_2_0", "road_5_2_0", "road_6_2_0", "road_7_2_1", "road_7_3_1", "road_7_4_1", "road_7_5_1", "road_7_6_1", "road_7_7_1", "road_7_8_1", "road_7_9_1", "road_7_10_0"], "interval": 1.0, "startTime": 172, "endTime": 172},
{"vehicle": {"length": 5.0, "width": 2.0, "maxPosAcc": 2.0, "maxNegAcc": 4.5, "usualPosAcc": 2.0, "usualNegAcc": 4.5, "minGap": 2.5, "maxSpeed": 11.111, "headwayTime": 2}, "route": ["road_5_0_1", "road_5_1_2", "road_4_1_2", "road_3_1_2", "road_2_1_2", "road_1_1_3"], "interval": 1.0, "startTime": 172, "endTime": 172},
{"vehicle": {"length": 5.0, "width": 2.0, "maxPosAcc": 2.0, "maxNegAcc": 4.5, "usualPosAcc": 2.0, "usualNegAcc": 4.5, "minGap": 2.5, "maxSpeed": 11.111, "headwayTime": 2}, "route": ["road_2_29_3", "road_2_28_0", "road_3_28_3", "road_3_27_2", "road_2_27_3", "road_2_26_3", "road_2_25_3", "road_2_24_3", "road_2_23_3", "road_2_22_3", "road_2_21_3", "road_2_20_3", "road_2_19_3", "road_2_18_3", "road_2_17_3", "road_2_16_3", "road_2_15_3", "road_2_14_3", "road_2_13_3", "road_2_12_3", "road_2_11_3", "road_2_10_3", "road_2_9_3", "road_2_8_3", "road_2_7_3", "road_2_6_3", "road_2_5_3", "road_2_4_3", "road_2_3_3", "road_2_2_3", "road_2_1_2", "road_1_1_3"], "interval": 1.0, "startTime": 172, "endTime": 172},
{"vehicle": {"length": 5.0, "width": 2.0, "maxPosAcc": 2.0, "maxNegAcc": 4.5, "usualPosAcc": 2.0, "usualNegAcc": 4.5, "minGap": 2.5, "maxSpeed": 11.111, "headwayTime": 2}, "route": ["road_3_29_3", "road_3_28_3", "road_3_27_3", "road_3_26_3", "road_3_25_3", "road_3_24_2", "road_2_24_2", "road_1_24_2"], "interval": 1.0, "startTime": 172, "endTime": 172},
{"vehicle": {"length": 5.0, "width": 2.0, "maxPosAcc": 2.0, "maxNegAcc": 4.5, "usualPosAcc": 2.0, "usualNegAcc": 4.5, "minGap": 2.5, "maxSpeed": 11.111, "headwayTime": 2}, "route": ["road_6_29_3", "road_6_28_0", "road_7_28_3", "road_7_27_2", "road_6_27_2", "road_5_27_3", "road_5_26_3", "road_5_25_2", "road_4_25_2", "road_3_25_2", "road_2_25_3", "road_2_24_3", "road_2_23_3", "road_2_22_3", "road_2_21_3", "road_2_20_3", "road_2_19_3", "road_2_18_3", "road_2_17_3", "road_2_16_3", "road_2_15_3", "road_2_14_3", "road_2_13_3", "road_2_12_3", "road_2_11_3", "road_2_10_3", "road_2_9_3", "road_2_8_3", "road_2_7_3", "road_2_6_3", "road_2_5_3", "road_2_4_3", "road_2_3_3", "road_2_2_3", "road_2_1_3"], "interval": 1.0, "startTime": 172, "endTime": 172},
{"vehicle": {"length": 5.0, "width": 2.0, "maxPosAcc": 2.0, "maxNegAcc": 4.5, "usualPosAcc": 2.0, "usualNegAcc": 4.5, "minGap": 2.5, "maxSpeed": 11.111, "headwayTime": 2}, "route": ["road_0_15_0", "road_1_15_1", "road_1_16_1", "road_1_17_1", "road_1_18_1", "road_1_19_1", "road_1_20_1", "road_1_21_1", "road_1_22_1", "road_1_23_1", "road_1_24_1", "road_1_25_2"], "interval": 1.0, "startTime": 172, "endTime": 172},
{"vehicle": {"length": 5.0, "width": 2.0, "maxPosAcc": 2.0, "maxNegAcc": 4.5, "usualPosAcc": 2.0, "usualNegAcc": 4.5, "minGap": 2.5, "maxSpeed": 11.111, "headwayTime": 2}, "route": ["road_1_0_1", "road_1_1_1", "road_1_2_1", "road_1_3_1", "road_1_4_1", "road_1_5_1", "road_1_6_1", "road_1_7_1", "road_1_8_1", "road_1_9_1", "road_1_10_1", "road_1_11_1", "road_1_12_1", "road_1_13_1", "road_1_14_1", "road_1_15_1", "road_1_16_1", "road_1_17_1", "road_1_18_1", "road_1_19_2"], "interval": 1.0, "startTime": 173, "endTime": 173},
{"vehicle": {"length": 5.0, "width": 2.0, "maxPosAcc": 2.0, "maxNegAcc": 4.5, "usualPosAcc": 2.0, "usualNegAcc": 4.5, "minGap": 2.5, "maxSpeed": 11.111, "headwayTime": 2}, "route": ["road_0_15_0", "road_1_15_1", "road_1_16_0", "road_2_16_0", "road_3_16_0", "road_4_16_0", "road_5_16_0", "road_6_16_0", "road_7_16_3", "road_7_15_0"], "interval": 1.0, "startTime": 173, "endTime": 173},
{"vehicle": {"length": 5.0, "width": 2.0, "maxPosAcc": 2.0, "maxNegAcc": 4.5, "usualPosAcc": 2.0, "usualNegAcc": 4.5, "minGap": 2.5, "maxSpeed": 11.111, "headwayTime": 2}, "route": ["road_2_0_1", "road_2_1_2", "road_1_1_3"], "interval": 1.0, "startTime": 173, "endTime": 173},
{"vehicle": {"length": 5.0, "width": 2.0, "maxPosAcc": 2.0, "maxNegAcc": 4.5, "usualPosAcc": 2.0, "usualNegAcc": 4.5, "minGap": 2.5, "maxSpeed": 11.111, "headwayTime": 2}, "route": ["road_0_20_0", "road_1_20_0", "road_2_20_1", "road_2_21_1", "road_2_22_1", "road_2_23_1", "road_2_24_1", "road_2_25_1", "road_2_26_0", "road_3_26_0", "road_4_26_1", "road_4_27_1", "road_4_28_1"], "interval": 1.0, "startTime": 174, "endTime": 174},
{"vehicle": {"length": 5.0, "width": 2.0, "maxPosAcc": 2.0, "maxNegAcc": 4.5, "usualPosAcc": 2.0, "usualNegAcc": 4.5, "minGap": 2.5, "maxSpeed": 11.111, "headwayTime": 2}, "route": ["road_3_29_3", "road_3_28_0", "road_4_28_0", "road_5_28_0", "road_6_28_0", "road_7_28_3", "road_7_27_3", "road_7_26_0"], "interval": 1.0, "startTime": 174, "endTime": 174},
{"vehicle": {"length": 5.0, "width": 2.0, "maxPosAcc": 2.0, "maxNegAcc": 4.5, "usualPosAcc": 2.0, "usualNegAcc": 4.5, "minGap": 2.5, "maxSpeed": 11.111, "headwayTime": 2}, "route": ["road_0_10_0", "road_1_10_1", "road_1_11_1", "road_1_12_1", "road_1_13_1", "road_1_14_1", "road_1_15_1", "road_1_16_1", "road_1_17_1", "road_1_18_1", "road_1_19_1", "road_1_20_1", "road_1_21_1", "road_1_22_1", "road_1_23_1", "road_1_24_1", "road_1_25_1", "road_1_26_1", "road_1_27_1", "road_1_28_1"], "interval": 1.0, "startTime": 175, "endTime": 175},
{"vehicle": {"length": 5.0, "width": 2.0, "maxPosAcc": 2.0, "maxNegAcc": 4.5, "usualPosAcc": 2.0, "usualNegAcc": 4.5, "minGap": 2.5, "maxSpeed": 11.111, "headwayTime": 2}, "route": ["road_1_0_1", "road_1_1_1", "road_1_2_1", "road_1_3_2"], "interval": 1.0, "startTime": 176, "endTime": 176},
{"vehicle": {"length": 5.0, "width": 2.0, "maxPosAcc": 2.0, "maxNegAcc": 4.5, "usualPosAcc": 2.0, "usualNegAcc": 4.5, "minGap": 2.5, "maxSpeed": 11.111, "headwayTime": 2}, "route": ["road_0_22_0", "road_1_22_1", "road_1_23_2"], "interval": 1.0, "startTime": 176, "endTime": 176},
{"vehicle": {"length": 5.0, "width": 2.0, "maxPosAcc": 2.0, "maxNegAcc": 4.5, "usualPosAcc": 2.0, "usualNegAcc": 4.5, "minGap": 2.5, "maxSpeed": 11.111, "headwayTime": 2}, "route": ["road_1_29_3", "road_1_28_0", "road_2_28_3", "road_2_27_3", "road_2_26_3", "road_2_25_3", "road_2_24_3", "road_2_23_3", "road_2_22_3", "road_2_21_3", "road_2_20_3", "road_2_19_3", "road_2_18_3", "road_2_17_3", "road_2_16_3", "road_2_15_3", "road_2_14_3", "road_2_13_3", "road_2_12_3", "road_2_11_3", "road_2_10_3", "road_2_9_3", "road_2_8_3", "road_2_7_2", "road_1_7_2"], "interval": 1.0, "startTime": 176, "endTime": 176},
{"vehicle": {"length": 5.0, "width": 2.0, "maxPosAcc": 2.0, "maxNegAcc": 4.5, "usualPosAcc": 2.0, "usualNegAcc": 4.5, "minGap": 2.5, "maxSpeed": 11.111, "headwayTime": 2}, "route": ["road_2_29_3", "road_2_28_0", "road_3_28_3", "road_3_27_2", "road_2_27_3", "road_2_26_3", "road_2_25_3", "road_2_24_3", "road_2_23_3", "road_2_22_3", "road_2_21_3", "road_2_20_3", "road_2_19_3", "road_2_18_3", "road_2_17_3", "road_2_16_3", "road_2_15_3", "road_2_14_3", "road_2_13_3", "road_2_12_3", "road_2_11_3", "road_2_10_3", "road_2_9_3", "road_2_8_3", "road_2_7_3", "road_2_6_3", "road_2_5_3", "road_2_4_3", "road_2_3_3", "road_2_2_3", "road_2_1_2", "road_1_1_3"], "interval": 1.0, "startTime": 176, "endTime": 176},
{"vehicle": {"length": 5.0, "width": 2.0, "maxPosAcc": 2.0, "maxNegAcc": 4.5, "usualPosAcc": 2.0, "usualNegAcc": 4.5, "minGap": 2.5, "maxSpeed": 11.111, "headwayTime": 2}, "route": ["road_8_8_2", "road_7_8_3", "road_7_7_2", "road_6_7_2", "road_5_7_2", "road_4_7_2", "road_3_7_3", "road_3_6_3", "road_3_5_3", "road_3_4_3", "road_3_3_3", "road_3_2_3", "road_3_1_3"], "interval": 1.0, "startTime": 177, "endTime": 177},
{"vehicle": {"length": 5.0, "width": 2.0, "maxPosAcc": 2.0, "maxNegAcc": 4.5, "usualPosAcc": 2.0, "usualNegAcc": 4.5, "minGap": 2.5, "maxSpeed": 11.111, "headwayTime": 2}, "route": ["road_8_26_2", "road_7_26_3", "road_7_25_2", "road_6_25_2", "road_5_25_2", "road_4_25_2", "road_3_25_2", "road_2_25_3", "road_2_24_3", "road_2_23_3", "road_2_22_3", "road_2_21_3", "road_2_20_3", "road_2_19_3", "road_2_18_3", "road_2_17_3", "road_2_16_3", "road_2_15_2", "road_1_15_2"], "interval": 1.0, "startTime": 177, "endTime": 177},
{"vehicle": {"length": 5.0, "width": 2.0, "maxPosAcc": 2.0, "maxNegAcc": 4.5, "usualPosAcc": 2.0, "usualNegAcc": 4.5, "minGap": 2.5, "maxSpeed": 11.111, "headwayTime": 2}, "route": ["road_2_0_1", "road_2_1_2", "road_1_1_3"], "interval": 1.0, "startTime": 177, "endTime": 177},
{"vehicle": {"length": 5.0, "width": 2.0, "maxPosAcc": 2.0, "maxNegAcc": 4.5, "usualPosAcc": 2.0, "usualNegAcc": 4.5, "minGap": 2.5, "maxSpeed": 11.111, "headwayTime": 2}, "route": ["road_0_12_0", "road_1_12_0", "road_2_12_3", "road_2_11_3", "road_2_10_3", "road_2_9_3", "road_2_8_3", "road_2_7_3", "road_2_6_3", "road_2_5_3", "road_2_4_3", "road_2_3_3", "road_2_2_0", "road_3_2_0", "road_4_2_0", "road_5_2_3", "road_5_1_3"], "interval": 1.0, "startTime": 177, "endTime": 177},
{"vehicle": {"length": 5.0, "width": 2.0, "maxPosAcc": 2.0, "maxNegAcc": 4.5, "usualPosAcc": 2.0, "usualNegAcc": 4.5, "minGap": 2.5, "maxSpeed": 11.111, "headwayTime": 2}, "route": ["road_5_29_3", "road_5_28_0", "road_6_28_1"], "interval": 1.0, "startTime": 177, "endTime": 177},
{"vehicle": {"length": 5.0, "width": 2.0, "maxPosAcc": 2.0, "maxNegAcc": 4.5, "usualPosAcc": 2.0, "usualNegAcc": 4.5, "minGap": 2.5, "maxSpeed": 11.111, "headwayTime": 2}, "route": ["road_8_16_2", "road_7_16_3", "road_7_15_3", "road_7_14_3", "road_7_13_3", "road_7_12_3", "road_7_11_0"], "interval": 1.0, "startTime": 178, "endTime": 178},
{"vehicle": {"length": 5.0, "width": 2.0, "maxPosAcc": 2.0, "maxNegAcc": 4.5, "usualPosAcc": 2.0, "usualNegAcc": 4.5, "minGap": 2.5, "maxSpeed": 11.111, "headwayTime": 2}, "route": ["road_3_0_1", "road_3_1_2", "road_2_1_2", "road_1_1_1", "road_1_2_1", "road_1_3_1", "road_1_4_1", "road_1_5_1", "road_1_6_1", "road_1_7_1", "road_1_8_1", "road_1_9_1", "road_1_10_1", "road_1_11_1", "road_1_12_1", "road_1_13_1", "road_1_14_1", "road_1_15_1", "road_1_16_1", "road_1_17_1", "road_1_18_1", "road_1_19_1", "road_1_20_1", "road_1_21_1", "road_1_22_1", "road_1_23_2"], "interval": 1.0, "startTime": 178, "endTime": 178},
{"vehicle": {"length": 5.0, "width": 2.0, "maxPosAcc": 2.0, "maxNegAcc": 4.5, "usualPosAcc": 2.0, "usualNegAcc": 4.5, "minGap": 2.5, "maxSpeed": 11.111, "headwayTime": 2}, "route": ["road_0_21_0", "road_1_21_1", "road_1_22_0", "road_2_22_0", "road_3_22_0", "road_4_22_0", "road_5_22_3", "road_5_21_3", "road_5_20_3", "road_5_19_3", "road_5_18_3", "road_5_17_0", "road_6_17_0", "road_7_17_3", "road_7_16_3", "road_7_15_3", "road_7_14_3", "road_7_13_3", "road_7_12_3", "road_7_11_3", "road_7_10_0"], "interval": 1.0, "startTime": 178, "endTime": 178},
{"vehicle": {"length": 5.0, "width": 2.0, "maxPosAcc": 2.0, "maxNegAcc": 4.5, "usualPosAcc": 2.0, "usualNegAcc": 4.5, "minGap": 2.5, "maxSpeed": 11.111, "headwayTime": 2}, "route": ["road_8_9_2", "road_7_9_2", "road_6_9_2", "road_5_9_2", "road_4_9_2", "road_3_9_3", "road_3_8_3", "road_3_7_3", "road_3_6_3", "road_3_5_3", "road_3_4_3", "road_3_3_3", "road_3_2_3", "road_3_1_2", "road_2_1_2", "road_1_1_3"], "interval": 1.0, "startTime": 179, "endTime": 179},
{"vehicle": {"length": 5.0, "width": 2.0, "maxPosAcc": 2.0, "maxNegAcc": 4.5, "usualPosAcc": 2.0, "usualNegAcc": 4.5, "minGap": 2.5, "maxSpeed": 11.111, "headwayTime": 2}, "route": ["road_8_10_2", "road_7_10_2", "road_6_10_2", "road_5_10_3", "road_5_9_2", "road_4_9_2", "road_3_9_3", "road_3_8_3", "road_3_7_3", "road_3_6_3", "road_3_5_3", "road_3_4_3", "road_3_3_3", "road_3_2_3", "road_3_1_2", "road_2_1_2", "road_1_1_3"], "interval": 1.0, "startTime": 179, "endTime": 179},
{"vehicle": {"length": 5.0, "width": 2.0, "maxPosAcc": 2.0, "maxNegAcc": 4.5, "usualPosAcc": 2.0, "usualNegAcc": 4.5, "minGap": 2.5, "maxSpeed": 11.111, "headwayTime": 2}, "route": ["road_1_0_1", "road_1_1_1", "road_1_2_1", "road_1_3_1", "road_1_4_1", "road_1_5_1", "road_1_6_1", "road_1_7_1", "road_1_8_1", "road_1_9_1", "road_1_10_1", "road_1_11_1", "road_1_12_1", "road_1_13_1", "road_1_14_1", "road_1_15_1", "road_1_16_1", "road_1_17_1", "road_1_18_1", "road_1_19_1", "road_1_20_1", "road_1_21_2"], "interval": 1.0, "startTime": 179, "endTime": 179},
{"vehicle": {"length": 5.0, "width": 2.0, "maxPosAcc": 2.0, "maxNegAcc": 4.5, "usualPosAcc": 2.0, "usualNegAcc": 4.5, "minGap": 2.5, "maxSpeed": 11.111, "headwayTime": 2}, "route": ["road_0_27_0", "road_1_27_1", "road_1_28_0", "road_2_28_3", "road_2_27_3", "road_2_26_3", "road_2_25_3", "road_2_24_3", "road_2_23_3", "road_2_22_3", "road_2_21_3", "road_2_20_3", "road_2_19_3", "road_2_18_3", "road_2_17_3", "road_2_16_3", "road_2_15_3", "road_2_14_3", "road_2_13_3", "road_2_12_3", "road_2_11_3", "road_2_10_3", "road_2_9_3", "road_2_8_3", "road_2_7_3", "road_2_6_3", "road_2_5_3", "road_2_4_3", "road_2_3_3", "road_2_2_3", "road_2_1_2", "road_1_1_3"], "interval": 1.0, "startTime": 179, "endTime": 179},
{"vehicle": {"length": 5.0, "width": 2.0, "maxPosAcc": 2.0, "maxNegAcc": 4.5, "usualPosAcc": 2.0, "usualNegAcc": 4.5, "minGap": 2.5, "maxSpeed": 11.111, "headwayTime": 2}, "route": ["road_0_16_0", "road_1_16_0", "road_2_16_3", "road_2_15_3", "road_2_14_3", "road_2_13_3", "road_2_12_3", "road_2_11_3", "road_2_10_3", "road_2_9_3", "road_2_8_3", "road_2_7_3", "road_2_6_3", "road_2_5_3", "road_2_4_3", "road_2_3_3", "road_2_2_3", "road_2_1_3"], "interval": 1.0, "startTime": 179, "endTime": 179},
{"vehicle": {"length": 5.0, "width": 2.0, "maxPosAcc": 2.0, "maxNegAcc": 4.5, "usualPosAcc": 2.0, "usualNegAcc": 4.5, "minGap": 2.5, "maxSpeed": 11.111, "headwayTime": 2}, "route": ["road_0_17_0", "road_1_17_0", "road_2_17_3", "road_2_16_3", "road_2_15_3", "road_2_14_3", "road_2_13_3", "road_2_12_3", "road_2_11_3", "road_2_10_3", "road_2_9_3", "road_2_8_3", "road_2_7_3", "road_2_6_3", "road_2_5_3", "road_2_4_3", "road_2_3_3", "road_2_2_3", "road_2_1_2", "road_1_1_3"], "interval": 1.0, "startTime": 179, "endTime": 179},
{"vehicle": {"length": 5.0, "width": 2.0, "maxPosAcc": 2.0, "maxNegAcc": 4.5, "usualPosAcc": 2.0, "usualNegAcc": 4.5, "minGap": 2.5, "maxSpeed": 11.111, "headwayTime": 2}, "route": ["road_8_2_2", "road_7_2_1", "road_7_3_1", "road_7_4_1", "road_7_5_2", "road_6_5_2", "road_5_5_2", "road_4_5_2", "road_3_5_2", "road_2_5_2", "road_1_5_1", "road_1_6_1", "road_1_7_1", "road_1_8_1", "road_1_9_1", "road_1_10_1", "road_1_11_1", "road_1_12_1", "road_1_13_1", "road_1_14_1", "road_1_15_1", "road_1_16_1", "road_1_17_2"], "interval": 1.0, "startTime": 180, "endTime": 180},
{"vehicle": {"length": 5.0, "width": 2.0, "maxPosAcc": 2.0, "maxNegAcc": 4.5, "usualPosAcc": 2.0, "usualNegAcc": 4.5, "minGap": 2.5, "maxSpeed": 11.111, "headwayTime": 2}, "route": ["road_8_6_2", "road_7_6_3", "road_7_5_2", "road_6_5_2", "road_5_5_2", "road_4_5_2", "road_3_5_3", "road_3_4_3", "road_3_3_3", "road_3_2_3", "road_3_1_2", "road_2_1_2", "road_1_1_3"], "interval": 1.0, "startTime": 180, "endTime": 180},
{"vehicle": {"length": 5.0, "width": 2.0, "maxPosAcc": 2.0, "maxNegAcc": 4.5, "usualPosAcc": 2.0, "usualNegAcc": 4.5, "minGap": 2.5, "maxSpeed": 11.111, "headwayTime": 2}, "route": ["road_8_7_2", "road_7_7_2", "road_6_7_2", "road_5_7_3", "road_5_6_3", "road_5_5_2", "road_4_5_2", "road_3_5_3", "road_3_4_3", "road_3_3_3", "road_3_2_3", "road_3_1_2", "road_2_1_3"], "interval": 1.0, "startTime": 180, "endTime": 180},
{"vehicle": {"length": 5.0, "width": 2.0, "maxPosAcc": 2.0, "maxNegAcc": 4.5, "usualPosAcc": 2.0, "usualNegAcc": 4.5, "minGap": 2.5, "maxSpeed": 11.111, "headwayTime": 2}, "route": ["road_8_8_2", "road_7_8_1", "road_7_9_1", "road_7_10_1", "road_7_11_1", "road_7_12_1", "road_7_13_1", "road_7_14_1", "road_7_15_1", "road_7_16_0"], "interval": 1.0, "startTime": 180, "endTime": 180},
{"vehicle": {"length": 5.0, "width": 2.0, "maxPosAcc": 2.0, "maxNegAcc": 4.5, "usualPosAcc": 2.0, "usualNegAcc": 4.5, "minGap": 2.5, "maxSpeed": 11.111, "headwayTime": 2}, "route": ["road_8_9_2", "road_7_9_3", "road_7_8_3", "road_7_7_3", "road_7_6_3", "road_7_5_3", "road_7_4_3", "road_7_3_3", "road_7_2_3", "road_7_1_3"], "interval": 1.0, "startTime": 180, "endTime": 180},
{"vehicle": {"length": 5.0, "width": 2.0, "maxPosAcc": 2.0, "maxNegAcc": 4.5, "usualPosAcc": 2.0, "usualNegAcc": 4.5, "minGap": 2.5, "maxSpeed": 11.111, "headwayTime": 2}, "route": ["road_8_10_2", "road_7_10_2", "road_6_10_2", "road_5_10_3", "road_5_9_2", "road_4_9_2", "road_3_9_3", "road_3_8_3", "road_3_7_3", "road_3_6_3", "road_3_5_3", "road_3_4_3", "road_3_3_3", "road_3_2_3", "road_3_1_2", "road_2_1_2", "road_1_1_3"], "interval": 1.0, "startTime": 180, "endTime": 180},
{"vehicle": {"length": 5.0, "width": 2.0, "maxPosAcc": 2.0, "maxNegAcc": 4.5, "usualPosAcc": 2.0, "usualNegAcc": 4.5, "minGap": 2.5, "maxSpeed": 11.111, "headwayTime": 2}, "route": ["road_8_11_2", "road_7_11_2", "road_6_11_2", "road_5_11_2", "road_4_11_2", "road_3_11_3", "road_3_10_3", "road_3_9_3", "road_3_8_3", "road_3_7_3", "road_3_6_3", "road_3_5_3", "road_3_4_3", "road_3_3_3", "road_3_2_3", "road_3_1_2", "road_2_1_3"], "interval": 1.0, "startTime": 180, "endTime": 180},
{"vehicle": {"length": 5.0, "width": 2.0, "maxPosAcc": 2.0, "maxNegAcc": 4.5, "usualPosAcc": 2.0, "usualNegAcc": 4.5, "minGap": 2.5, "maxSpeed": 11.111, "headwayTime": 2}, "route": ["road_8_12_2", "road_7_12_3", "road_7_11_3", "road_7_10_3", "road_7_9_3", "road_7_8_3", "road_7_7_3", "road_7_6_3", "road_7_5_3", "road_7_4_3", "road_7_3_3", "road_7_2_3", "road_7_1_2", "road_6_1_3"], "interval": 1.0, "startTime": 180, "endTime": 180},
{"vehicle": {"length": 5.0, "width": 2.0, "maxPosAcc": 2.0, "maxNegAcc": 4.5, "usualPosAcc": 2.0, "usualNegAcc": 4.5, "minGap": 2.5, "maxSpeed": 11.111, "headwayTime": 2}, "route": ["road_8_13_2", "road_7_13_3", "road_7_12_3", "road_7_11_3", "road_7_10_3", "road_7_9_3", "road_7_8_0"], "interval": 1.0, "startTime": 180, "endTime": 180},
{"vehicle": {"length": 5.0, "width": 2.0, "maxPosAcc": 2.0, "maxNegAcc": 4.5, "usualPosAcc": 2.0, "usualNegAcc": 4.5, "minGap": 2.5, "maxSpeed": 11.111, "headwayTime": 2}, "route": ["road_8_16_2", "road_7_16_3", "road_7_15_3", "road_7_14_3", "road_7_13_3", "road_7_12_3", "road_7_11_3", "road_7_10_0"], "interval": 1.0, "startTime": 180, "endTime": 180},
{"vehicle": {"length": 5.0, "width": 2.0, "maxPosAcc": 2.0, "maxNegAcc": 4.5, "usualPosAcc": 2.0, "usualNegAcc": 4.5, "minGap": 2.5, "maxSpeed": 11.111, "headwayTime": 2}, "route": ["road_8_19_2", "road_7_19_1", "road_7_20_1", "road_7_21_1", "road_7_22_1", "road_7_23_1", "road_7_24_0"], "interval": 1.0, "startTime": 180, "endTime": 180},
{"vehicle": {"length": 5.0, "width": 2.0, "maxPosAcc": 2.0, "maxNegAcc": 4.5, "usualPosAcc": 2.0, "usualNegAcc": 4.5, "minGap": 2.5, "maxSpeed": 11.111, "headwayTime": 2}, "route": ["road_8_20_2", "road_7_20_3", "road_7_19_2", "road_6_19_2", "road_5_19_2", "road_4_19_2", "road_3_19_3", "road_3_18_3", "road_3_17_3", "road_3_16_3", "road_3_15_2", "road_2_15_2", "road_1_15_2"], "interval": 1.0, "startTime": 180, "endTime": 180},
{"vehicle": {"length": 5.0, "width": 2.0, "maxPosAcc": 2.0, "maxNegAcc": 4.5, "usualPosAcc": 2.0, "usualNegAcc": 4.5, "minGap": 2.5, "maxSpeed": 11.111, "headwayTime": 2}, "route": ["road_8_21_2", "road_7_21_3", "road_7_20_3", "road_7_19_3", "road_7_18_3", "road_7_17_3", "road_7_16_3", "road_7_15_3", "road_7_14_3", "road_7_13_3", "road_7_12_3", "road_7_11_3", "road_7_10_2", "road_6_10_2", "road_5_10_2", "road_4_10_2", "road_3_10_3", "road_3_9_3", "road_3_8_3", "road_3_7_3", "road_3_6_3", "road_3_5_3", "road_3_4_3", "road_3_3_3", "road_3_2_3", "road_3_1_3"], "interval": 1.0, "startTime": 180, "endTime": 180},
{"vehicle": {"length": 5.0, "width": 2.0, "maxPosAcc": 2.0, "maxNegAcc": 4.5, "usualPosAcc": 2.0, "usualNegAcc": 4.5, "minGap": 2.5, "maxSpeed": 11.111, "headwayTime": 2}, "route": ["road_0_24_0", "road_1_24_0", "road_2_24_1", "road_2_25_1", "road_2_26_1", "road_2_27_1", "road_2_28_0", "road_3_28_1"], "interval": 1.0, "startTime": 180, "endTime": 180},
{"vehicle": {"length": 5.0, "width": 2.0, "maxPosAcc": 2.0, "maxNegAcc": 4.5, "usualPosAcc": 2.0, "usualNegAcc": 4.5, "minGap": 2.5, "maxSpeed": 11.111, "headwayTime": 2}, "route": ["road_0_8_0", "road_1_8_0", "road_2_8_3", "road_2_7_3", "road_2_6_3", "road_2_5_3", "road_2_4_3", "road_2_3_3", "road_2_2_3", "road_2_1_2", "road_1_1_3"], "interval": 1.0, "startTime": 180, "endTime": 180},
{"vehicle": {"length": 5.0, "width": 2.0, "maxPosAcc": 2.0, "maxNegAcc": 4.5, "usualPosAcc": 2.0, "usualNegAcc": 4.5, "minGap": 2.5, "maxSpeed": 11.111, "headwayTime": 2}, "route": ["road_1_0_1", "road_1_1_1", "road_1_2_0", "road_2_2_0", "road_3_2_0", "road_4_2_0", "road_5_2_0", "road_6_2_0", "road_7_2_3", "road_7_1_3"], "interval": 1.0, "startTime": 180, "endTime": 180},
{"vehicle": {"length": 5.0, "width": 2.0, "maxPosAcc": 2.0, "maxNegAcc": 4.5, "usualPosAcc": 2.0, "usualNegAcc": 4.5, "minGap": 2.5, "maxSpeed": 11.111, "headwayTime": 2}, "route": ["road_3_0_1", "road_3_1_2", "road_2_1_1", "road_2_2_0", "road_3_2_0", "road_4_2_0", "road_5_2_0", "road_6_2_0", "road_7_2_1", "road_7_3_1", "road_7_4_1", "road_7_5_1", "road_7_6_1", "road_7_7_1", "road_7_8_1", "road_7_9_1", "road_7_10_0"], "interval": 1.0, "startTime": 180, "endTime": 180},
{"vehicle": {"length": 5.0, "width": 2.0, "maxPosAcc": 2.0, "maxNegAcc": 4.5, "usualPosAcc": 2.0, "usualNegAcc": 4.5, "minGap": 2.5, "maxSpeed": 11.111, "headwayTime": 2}, "route": ["road_5_0_1", "road_5_1_2", "road_4_1_2", "road_3_1_2", "road_2_1_3"], "interval": 1.0, "startTime": 180, "endTime": 180},
{"vehicle": {"length": 5.0, "width": 2.0, "maxPosAcc": 2.0, "maxNegAcc": 4.5, "usualPosAcc": 2.0, "usualNegAcc": 4.5, "minGap": 2.5, "maxSpeed": 11.111, "headwayTime": 2}, "route": ["road_0_13_0", "road_1_13_1", "road_1_14_0", "road_2_14_0", "road_3_14_0", "road_4_14_0", "road_5_14_0", "road_6_14_0", "road_7_14_1", "road_7_15_1", "road_7_16_1", "road_7_17_1", "road_7_18_1", "road_7_19_1", "road_7_20_1", "road_7_21_1", "road_7_22_1", "road_7_23_0"], "interval": 1.0, "startTime": 180, "endTime": 180},
{"vehicle": {"length": 5.0, "width": 2.0, "maxPosAcc": 2.0, "maxNegAcc": 4.5, "usualPosAcc": 2.0, "usualNegAcc": 4.5, "minGap": 2.5, "maxSpeed": 11.111, "headwayTime": 2}, "route": ["road_0_2_0", "road_1_2_1", "road_1_3_1", "road_1_4_1", "road_1_5_1", "road_1_6_1", "road_1_7_1", "road_1_8_1", "road_1_9_1", "road_1_10_1", "road_1_11_1", "road_1_12_2"], "interval": 1.0, "startTime": 180, "endTime": 180},
{"vehicle": {"length": 5.0, "width": 2.0, "maxPosAcc": 2.0, "maxNegAcc": 4.5, "usualPosAcc": 2.0, "usualNegAcc": 4.5, "minGap": 2.5, "maxSpeed": 11.111, "headwayTime": 2}, "route": ["road_0_22_0", "road_1_22_0", "road_2_22_3", "road_2_21_3", "road_2_20_3", "road_2_19_3", "road_2_18_3", "road_2_17_2", "road_1_17_2"], "interval": 1.0, "startTime": 180, "endTime": 180},
{"vehicle": {"length": 5.0, "width": 2.0, "maxPosAcc": 2.0, "maxNegAcc": 4.5, "usualPosAcc": 2.0, "usualNegAcc": 4.5, "minGap": 2.5, "maxSpeed": 11.111, "headwayTime": 2}, "route": ["road_0_10_0", "road_1_10_1", "road_1_11_1", "road_1_12_1", "road_1_13_1", "road_1_14_1", "road_1_15_1", "road_1_16_1", "road_1_17_1", "road_1_18_1", "road_1_19_1", "road_1_20_1", "road_1_21_1", "road_1_22_1", "road_1_23_1", "road_1_24_2"], "interval": 1.0, "startTime": 180, "endTime": 180},
{"vehicle": {"length": 5.0, "width": 2.0, "maxPosAcc": 2.0, "maxNegAcc": 4.5, "usualPosAcc": 2.0, "usualNegAcc": 4.5, "minGap": 2.5, "maxSpeed": 11.111, "headwayTime": 2}, "route": ["road_0_27_0", "road_1_27_1", "road_1_28_0", "road_2_28_0", "road_3_28_0", "road_4_28_0", "road_5_28_3", "road_5_27_3", "road_5_26_3", "road_5_25_3", "road_5_24_3", "road_5_23_3", "road_5_22_3", "road_5_21_3", "road_5_20_3", "road_5_19_3", "road_5_18_3", "road_5_17_0", "road_6_17_0", "road_7_17_3", "road_7_16_3", "road_7_15_3", "road_7_14_3", "road_7_13_3", "road_7_12_3", "road_7_11_3", "road_7_10_3", "road_7_9_3", "road_7_8_3", "road_7_7_3", "road_7_6_3", "road_7_5_3", "road_7_4_3", "road_7_3_0"], "interval": 1.0, "startTime": 180, "endTime": 180},
{"vehicle": {"length": 5.0, "width": 2.0, "maxPosAcc": 2.0, "maxNegAcc": 4.5, "usualPosAcc": 2.0, "usualNegAcc": 4.5, "minGap": 2.5, "maxSpeed": 11.111, "headwayTime": 2}, "route": ["road_0_16_0", "road_1_16_0", "road_2_16_3", "road_2_15_3", "road_2_14_3", "road_2_13_3", "road_2_12_3", "road_2_11_3", "road_2_10_3", "road_2_9_3", "road_2_8_3", "road_2_7_3", "road_2_6_3", "road_2_5_3", "road_2_4_3", "road_2_3_3", "road_2_2_3", "road_2_1_2", "road_1_1_3"], "interval": 1.0, "startTime": 180, "endTime": 180},
{"vehicle": {"length": 5.0, "width": 2.0, "maxPosAcc": 2.0, "maxNegAcc": 4.5, "usualPosAcc": 2.0, "usualNegAcc": 4.5, "minGap": 2.5, "maxSpeed": 11.111, "headwayTime": 2}, "route": ["road_0_5_0", "road_1_5_1", "road_1_6_0", "road_2_6_3", "road_2_5_3", "road_2_4_3", "road_2_3_3", "road_2_2_3", "road_2_1_2", "road_1_1_3"], "interval": 1.0, "startTime": 180, "endTime": 180},
{"vehicle": {"length": 5.0, "width": 2.0, "maxPosAcc": 2.0, "maxNegAcc": 4.5, "usualPosAcc": 2.0, "usualNegAcc": 4.5, "minGap": 2.5, "maxSpeed": 11.111, "headwayTime": 2}, "route": ["road_0_18_0", "road_1_18_0", "road_2_18_0", "road_3_18_0", "road_4_18_0", "road_5_18_0", "road_6_18_0", "road_7_18_1", "road_7_19_1", "road_7_20_1", "road_7_21_1", "road_7_22_1", "road_7_23_1", "road_7_24_0"], "interval": 1.0, "startTime": 180, "endTime": 180},
{"vehicle": {"length": 5.0, "width": 2.0, "maxPosAcc": 2.0, "maxNegAcc": 4.5, "usualPosAcc": 2.0, "usualNegAcc": 4.5, "minGap": 2.5, "maxSpeed": 11.111, "headwayTime": 2}, "route": ["road_0_20_0", "road_1_20_0", "road_2_20_3", "road_2_19_3", "road_2_18_3", "road_2_17_3", "road_2_16_3", "road_2_15_3", "road_2_14_3", "road_2_13_3", "road_2_12_3", "road_2_11_3", "road_2_10_3", "road_2_9_3", "road_2_8_3", "road_2_7_3", "road_2_6_3", "road_2_5_3", "road_2_4_3", "road_2_3_3", "road_2_2_3", "road_2_1_2", "road_1_1_3"], "interval": 1.0, "startTime": 180, "endTime": 180},
{"vehicle": {"length": 5.0, "width": 2.0, "maxPosAcc": 2.0, "maxNegAcc": 4.5, "usualPosAcc": 2.0, "usualNegAcc": 4.5, "minGap": 2.5, "maxSpeed": 11.111, "headwayTime": 2}, "route": ["road_0_12_0", "road_1_12_0", "road_2_12_1", "road_2_13_1", "road_2_14_1", "road_2_15_1", "road_2_16_1", "road_2_17_1", "road_2_18_1", "road_2_19_1", "road_2_20_1", "road_2_21_1", "road_2_22_1", "road_2_23_1", "road_2_24_1", "road_2_25_1", "road_2_26_0", "road_3_26_0", "road_4_26_0", "road_5_26_0", "road_6_26_1", "road_6_27_1", "road_6_28_1"], "interval": 1.0, "startTime": 180, "endTime": 180},
{"vehicle": {"length": 5.0, "width": 2.0, "maxPosAcc": 2.0, "maxNegAcc": 4.5, "usualPosAcc": 2.0, "usualNegAcc": 4.5, "minGap": 2.5, "maxSpeed": 11.111, "headwayTime": 2}, "route": ["road_5_29_3", "road_5_28_3", "road_5_27_2", "road_4_27_2", "road_3_27_2", "road_2_27_2", "road_1_27_1", "road_1_28_1"], "interval": 1.0, "startTime": 180, "endTime": 180},
{"vehicle": {"length": 5.0, "width": 2.0, "maxPosAcc": 2.0, "maxNegAcc": 4.5, "usualPosAcc": 2.0, "usualNegAcc": 4.5, "minGap": 2.5, "maxSpeed": 11.111, "headwayTime": 2}, "route": ["road_1_29_3", "road_1_28_0", "road_2_28_3", "road_2_27_3", "road_2_26_3", "road_2_25_3", "road_2_24_3", "road_2_23_3", "road_2_22_3", "road_2_21_3", "road_2_20_3", "road_2_19_2", "road_1_19_2"], "interval": 1.0, "startTime": 180, "endTime": 180},
{"vehicle": {"length": 5.0, "width": 2.0, "maxPosAcc": 2.0, "maxNegAcc": 4.5, "usualPosAcc": 2.0, "usualNegAcc": 4.5, "minGap": 2.5, "maxSpeed": 11.111, "headwayTime": 2}, "route": ["road_3_29_3", "road_3_28_0", "road_4_28_0", "road_5_28_0", "road_6_28_0", "road_7_28_1"], "interval": 1.0, "startTime": 180, "endTime": 180},
{"vehicle": {"length": 5.0, "width": 2.0, "maxPosAcc": 2.0, "maxNegAcc": 4.5, "usualPosAcc": 2.0, "usualNegAcc": 4.5, "minGap": 2.5, "maxSpeed": 11.111, "headwayTime": 2}, "route": ["road_4_29_3", "road_4_28_0", "road_5_28_3", "road_5_27_2", "road_4_27_2", "road_3_27_2", "road_2_27_2", "road_1_27_1", "road_1_28_0", "road_2_28_1"], "interval": 1.0, "startTime": 180, "endTime": 180},
{"vehicle": {"length": 5.0, "width": 2.0, "maxPosAcc": 2.0, "maxNegAcc": 4.5, "usualPosAcc": 2.0, "usualNegAcc": 4.5, "minGap": 2.5, "maxSpeed": 11.111, "headwayTime": 2}, "route": ["road_6_29_3", "road_6_28_0", "road_7_28_3", "road_7_27_2", "road_6_27_2", "road_5_27_3", "road_5_26_3", "road_5_25_2", "road_4_25_2", "road_3_25_2", "road_2_25_3", "road_2_24_3", "road_2_23_3", "road_2_22_3", "road_2_21_3", "road_2_20_3", "road_2_19_3", "road_2_18_3", "road_2_17_3", "road_2_16_3", "road_2_15_3", "road_2_14_3", "road_2_13_3", "road_2_12_3", "road_2_11_3", "road_2_10_3", "road_2_9_3", "road_2_8_3", "road_2_7_3", "road_2_6_3", "road_2_5_3", "road_2_4_3", "road_2_3_3", "road_2_2_3", "road_2_1_2", "road_1_1_1", "road_1_2_2"], "interval": 1.0, "startTime": 180, "endTime": 180},
{"vehicle": {"length": 5.0, "width": 2.0, "maxPosAcc": 2.0, "maxNegAcc": 4.5, "usualPosAcc": 2.0, "usualNegAcc": 4.5, "minGap": 2.5, "maxSpeed": 11.111, "headwayTime": 2}, "route": ["road_0_9_0", "road_1_9_1", "road_1_10_0", "road_2_10_3", "road_2_9_3", "road_2_8_3", "road_2_7_3", "road_2_6_3", "road_2_5_3", "road_2_4_3", "road_2_3_3", "road_2_2_3", "road_2_1_2", "road_1_1_3"], "interval": 1.0, "startTime": 180, "endTime": 180},
{"vehicle": {"length": 5.0, "width": 2.0, "maxPosAcc": 2.0, "maxNegAcc": 4.5, "usualPosAcc": 2.0, "usualNegAcc": 4.5, "minGap": 2.5, "maxSpeed": 11.111, "headwayTime": 2}, "route": ["road_0_3_0", "road_1_3_0", "road_2_3_3", "road_2_2_0", "road_3_2_0", "road_4_2_0", "road_5_2_0", "road_6_2_0", "road_7_2_3", "road_7_1_2", "road_6_1_3"], "interval": 1.0, "startTime": 180, "endTime": 180},
{"vehicle": {"length": 5.0, "width": 2.0, "maxPosAcc": 2.0, "maxNegAcc": 4.5, "usualPosAcc": 2.0, "usualNegAcc": 4.5, "minGap": 2.5, "maxSpeed": 11.111, "headwayTime": 2}, "route": ["road_0_4_0", "road_1_4_1", "road_1_5_1", "road_1_6_0", "road_2_6_3", "road_2_5_3", "road_2_4_3", "road_2_3_3", "road_2_2_3", "road_2_1_2", "road_1_1_3"], "interval": 1.0, "startTime": 180, "endTime": 180},
{"vehicle": {"length": 5.0, "width": 2.0, "maxPosAcc": 2.0, "maxNegAcc": 4.5, "usualPosAcc": 2.0, "usualNegAcc": 4.5, "minGap": 2.5, "maxSpeed": 11.111, "headwayTime": 2}, "route": ["road_0_7_0", "road_1_7_1", "road_1_8_0", "road_2_8_3", "road_2_7_3", "road_2_6_3", "road_2_5_3", "road_2_4_3", "road_2_3_3", "road_2_2_3", "road_2_1_2", "road_1_1_1", "road_1_2_2"], "interval": 1.0, "startTime": 180, "endTime": 180},
{"vehicle": {"length": 5.0, "width": 2.0, "maxPosAcc": 2.0, "maxNegAcc": 4.5, "usualPosAcc": 2.0, "usualNegAcc": 4.5, "minGap": 2.5, "maxSpeed": 11.111, "headwayTime": 2}, "route": ["road_0_14_0", "road_1_14_1", "road_1_15_1", "road_1_16_1", "road_1_17_1", "road_1_18_1", "road_1_19_1", "road_1_20_2"], "interval": 1.0, "startTime": 180, "endTime": 180},
{"vehicle": {"length": 5.0, "width": 2.0, "maxPosAcc": 2.0, "maxNegAcc": 4.5, "usualPosAcc": 2.0, "usualNegAcc": 4.5, "minGap": 2.5, "maxSpeed": 11.111, "headwayTime": 2}, "route": ["road_0_15_0", "road_1_15_1", "road_1_16_0", "road_2_16_1", "road_2_17_1", "road_2_18_1", "road_2_19_1", "road_2_20_1", "road_2_21_1", "road_2_22_1", "road_2_23_1", "road_2_24_1", "road_2_25_1", "road_2_26_1", "road_2_27_1", "road_2_28_0", "road_3_28_1"], "interval": 1.0, "startTime": 180, "endTime": 180},
{"vehicle": {"length": 5.0, "width": 2.0, "maxPosAcc": 2.0, "maxNegAcc": 4.5, "usualPosAcc": 2.0, "usualNegAcc": 4.5, "minGap": 2.5, "maxSpeed": 11.111, "headwayTime": 2}, "route": ["road_0_17_0", "road_1_17_0", "road_2_17_3", "road_2_16_3", "road_2_15_3", "road_2_14_3", "road_2_13_3", "road_2_12_3", "road_2_11_3", "road_2_10_3", "road_2_9_3", "road_2_8_3", "road_2_7_3", "road_2_6_3", "road_2_5_3", "road_2_4_3", "road_2_3_3", "road_2_2_3", "road_2_1_2", "road_1_1_3"], "interval": 1.0, "startTime": 180, "endTime": 180},
{"vehicle": {"length": 5.0, "width": 2.0, "maxPosAcc": 2.0, "maxNegAcc": 4.5, "usualPosAcc": 2.0, "usualNegAcc": 4.5, "minGap": 2.5, "maxSpeed": 11.111, "headwayTime": 2}, "route": ["road_0_19_0", "road_1_19_1", "road_1_20_1", "road_1_21_1", "road_1_22_2"], "interval": 1.0, "startTime": 180, "endTime": 180},
{"vehicle": {"length": 5.0, "width": 2.0, "maxPosAcc": 2.0, "maxNegAcc": 4.5, "usualPosAcc": 2.0, "usualNegAcc": 4.5, "minGap": 2.5, "maxSpeed": 11.111, "headwayTime": 2}, "route": ["road_2_0_1", "road_2_1_2", "road_1_1_3"], "interval": 1.0, "startTime": 180, "endTime": 180},
{"vehicle": {"length": 5.0, "width": 2.0, "maxPosAcc": 2.0, "maxNegAcc": 4.5, "usualPosAcc": 2.0, "usualNegAcc": 4.5, "minGap": 2.5, "maxSpeed": 11.111, "headwayTime": 2}, "route": ["road_2_29_3", "road_2_28_3", "road_2_27_3", "road_2_26_3", "road_2_25_3", "road_2_24_3", "road_2_23_3", "road_2_22_3", "road_2_21_3", "road_2_20_3", "road_2_19_3", "road_2_18_3", "road_2_17_3", "road_2_16_3", "road_2_15_3", "road_2_14_3", "road_2_13_3", "road_2_12_3", "road_2_11_3", "road_2_10_3", "road_2_9_3", "road_2_8_3", "road_2_7_3", "road_2_6_3", "road_2_5_3", "road_2_4_3", "road_2_3_3", "road_2_2_3", "road_2_1_2", "road_1_1_3"], "interval": 1.0, "startTime": 180, "endTime": 180},
{"vehicle": {"length": 5.0, "width": 2.0, "maxPosAcc": 2.0, "maxNegAcc": 4.5, "usualPosAcc": 2.0, "usualNegAcc": 4.5, "minGap": 2.5, "maxSpeed": 11.111, "headwayTime": 2}, "route": ["road_7_0_1", "road_7_1_1", "road_7_2_1", "road_7_3_1", "road_7_4_1", "road_7_5_1", "road_7_6_1", "road_7_7_1", "road_7_8_1", "road_7_9_1", "road_7_10_1", "road_7_11_1", "road_7_12_1", "road_7_13_1", "road_7_14_1", "road_7_15_1", "road_7_16_1", "road_7_17_1", "road_7_18_0"], "interval": 1.0, "startTime": 181, "endTime": 181},
{"vehicle": {"length": 5.0, "width": 2.0, "maxPosAcc": 2.0, "maxNegAcc": 4.5, "usualPosAcc": 2.0, "usualNegAcc": 4.5, "minGap": 2.5, "maxSpeed": 11.111, "headwayTime": 2}, "route": ["road_1_0_1", "road_1_1_1", "road_1_2_0", "road_2_2_0", "road_3_2_0", "road_4_2_0", "road_5_2_0", "road_6_2_0", "road_7_2_1", "road_7_3_1", "road_7_4_1", "road_7_5_1", "road_7_6_1", "road_7_7_1", "road_7_8_1", "road_7_9_1", "road_7_10_1", "road_7_11_1", "road_7_12_1", "road_7_13_1", "road_7_14_1", "road_7_15_0"], "interval": 1.0, "startTime": 181, "endTime": 181},
{"vehicle": {"length": 5.0, "width": 2.0, "maxPosAcc": 2.0, "maxNegAcc": 4.5, "usualPosAcc": 2.0, "usualNegAcc": 4.5, "minGap": 2.5, "maxSpeed": 11.111, "headwayTime": 2}, "route": ["road_8_6_2", "road_7_6_3", "road_7_5_2", "road_6_5_2", "road_5_5_2", "road_4_5_2", "road_3_5_3", "road_3_4_3", "road_3_3_3", "road_3_2_3", "road_3_1_2", "road_2_1_2", "road_1_1_3"], "interval": 1.0, "startTime": 182, "endTime": 182},
{"vehicle": {"length": 5.0, "width": 2.0, "maxPosAcc": 2.0, "maxNegAcc": 4.5, "usualPosAcc": 2.0, "usualNegAcc": 4.5, "minGap": 2.5, "maxSpeed": 11.111, "headwayTime": 2}, "route": ["road_8_7_2", "road_7_7_2", "road_6_7_2", "road_5_7_3", "road_5_6_3", "road_5_5_2", "road_4_5_2", "road_3_5_3", "road_3_4_3", "road_3_3_3", "road_3_2_3", "road_3_1_2", "road_2_1_3"], "interval": 1.0, "startTime": 182, "endTime": 182},
{"vehicle": {"length": 5.0, "width": 2.0, "maxPosAcc": 2.0, "maxNegAcc": 4.5, "usualPosAcc": 2.0, "usualNegAcc": 4.5, "minGap": 2.5, "maxSpeed": 11.111, "headwayTime": 2}, "route": ["road_8_8_2", "road_7_8_3", "road_7_7_2", "road_6_7_2", "road_5_7_2", "road_4_7_2", "road_3_7_3", "road_3_6_3", "road_3_5_3", "road_3_4_3", "road_3_3_3", "road_3_2_3", "road_3_1_2", "road_2_1_3"], "interval": 1.0, "startTime": 182, "endTime": 182},
{"vehicle": {"length": 5.0, "width": 2.0, "maxPosAcc": 2.0, "maxNegAcc": 4.5, "usualPosAcc": 2.0, "usualNegAcc": 4.5, "minGap": 2.5, "maxSpeed": 11.111, "headwayTime": 2}, "route": ["road_8_9_2", "road_7_9_2", "road_6_9_2", "road_5_9_2", "road_4_9_2", "road_3_9_3", "road_3_8_3", "road_3_7_3", "road_3_6_3", "road_3_5_3", "road_3_4_3", "road_3_3_3", "road_3_2_3", "road_3_1_2", "road_2_1_2", "road_1_1_3"], "interval": 1.0, "startTime": 182, "endTime": 182},
{"vehicle": {"length": 5.0, "width": 2.0, "maxPosAcc": 2.0, "maxNegAcc": 4.5, "usualPosAcc": 2.0, "usualNegAcc": 4.5, "minGap": 2.5, "maxSpeed": 11.111, "headwayTime": 2}, "route": ["road_8_14_2", "road_7_14_1", "road_7_15_1", "road_7_16_1", "road_7_17_1", "road_7_18_1", "road_7_19_1", "road_7_20_1", "road_7_21_1", "road_7_22_1", "road_7_23_1", "road_7_24_1", "road_7_25_1", "road_7_26_1", "road_7_27_1", "road_7_28_1"], "interval": 1.0, "startTime": 182, "endTime": 182},
{"vehicle": {"length": 5.0, "width": 2.0, "maxPosAcc": 2.0, "maxNegAcc": 4.5, "usualPosAcc": 2.0, "usualNegAcc": 4.5, "minGap": 2.5, "maxSpeed": 11.111, "headwayTime": 2}, "route": ["road_8_18_2", "road_7_18_3", "road_7_17_3", "road_7_16_3", "road_7_15_3", "road_7_14_3", "road_7_13_3", "road_7_12_3", "road_7_11_3", "road_7_10_3", "road_7_9_3", "road_7_8_3", "road_7_7_3", "road_7_6_3", "road_7_5_3", "road_7_4_3", "road_7_3_3", "road_7_2_0"], "interval": 1.0, "startTime": 182, "endTime": 182},
{"vehicle": {"length": 5.0, "width": 2.0, "maxPosAcc": 2.0, "maxNegAcc": 4.5, "usualPosAcc": 2.0, "usualNegAcc": 4.5, "minGap": 2.5, "maxSpeed": 11.111, "headwayTime": 2}, "route": ["road_8_22_2", "road_7_22_1", "road_7_23_2", "road_6_23_2", "road_5_23_2", "road_4_23_2", "road_3_23_2", "road_2_23_1", "road_2_24_1", "road_2_25_1", "road_2_26_1", "road_2_27_1", "road_2_28_1"], "interval": 1.0, "startTime": 182, "endTime": 182},
{"vehicle": {"length": 5.0, "width": 2.0, "maxPosAcc": 2.0, "maxNegAcc": 4.5, "usualPosAcc": 2.0, "usualNegAcc": 4.5, "minGap": 2.5, "maxSpeed": 11.111, "headwayTime": 2}, "route": ["road_0_24_0", "road_1_24_0", "road_2_24_1", "road_2_25_1", "road_2_26_0", "road_3_26_0", "road_4_26_1", "road_4_27_1", "road_4_28_1"], "interval": 1.0, "startTime": 182, "endTime": 182},
{"vehicle": {"length": 5.0, "width": 2.0, "maxPosAcc": 2.0, "maxNegAcc": 4.5, "usualPosAcc": 2.0, "usualNegAcc": 4.5, "minGap": 2.5, "maxSpeed": 11.111, "headwayTime": 2}, "route": ["road_0_8_0", "road_1_8_1", "road_1_9_1", "road_1_10_1", "road_1_11_1", "road_1_12_1", "road_1_13_1", "road_1_14_1", "road_1_15_1", "road_1_16_1", "road_1_17_1", "road_1_18_2"], "interval": 1.0, "startTime": 182, "endTime": 182},
{"vehicle": {"length": 5.0, "width": 2.0, "maxPosAcc": 2.0, "maxNegAcc": 4.5, "usualPosAcc": 2.0, "usualNegAcc": 4.5, "minGap": 2.5, "maxSpeed": 11.111, "headwayTime": 2}, "route": ["road_1_0_1", "road_1_1_1", "road_1_2_1", "road_1_3_1", "road_1_4_1", "road_1_5_2"], "interval": 1.0, "startTime": 182, "endTime": 182},
{"vehicle": {"length": 5.0, "width": 2.0, "maxPosAcc": 2.0, "maxNegAcc": 4.5, "usualPosAcc": 2.0, "usualNegAcc": 4.5, "minGap": 2.5, "maxSpeed": 11.111, "headwayTime": 2}, "route": ["road_2_0_1", "road_2_1_2", "road_1_1_3"], "interval": 1.0, "startTime": 182, "endTime": 182},
{"vehicle": {"length": 5.0, "width": 2.0, "maxPosAcc": 2.0, "maxNegAcc": 4.5, "usualPosAcc": 2.0, "usualNegAcc": 4.5, "minGap": 2.5, "maxSpeed": 11.111, "headwayTime": 2}, "route": ["road_3_0_1", "road_3_1_2", "road_2_1_2", "road_1_1_3"], "interval": 1.0, "startTime": 182, "endTime": 182},
{"vehicle": {"length": 5.0, "width": 2.0, "maxPosAcc": 2.0, "maxNegAcc": 4.5, "usualPosAcc": 2.0, "usualNegAcc": 4.5, "minGap": 2.5, "maxSpeed": 11.111, "headwayTime": 2}, "route": ["road_4_0_1", "road_4_1_1", "road_4_2_0", "road_5_2_0", "road_6_2_0", "road_7_2_1", "road_7_3_1", "road_7_4_1", "road_7_5_1", "road_7_6_1", "road_7_7_1", "road_7_8_1", "road_7_9_1", "road_7_10_1", "road_7_11_1", "road_7_12_1", "road_7_13_1", "road_7_14_1", "road_7_15_1", "road_7_16_1", "road_7_17_1", "road_7_18_0"], "interval": 1.0, "startTime": 182, "endTime": 182},
{"vehicle": {"length": 5.0, "width": 2.0, "maxPosAcc": 2.0, "maxNegAcc": 4.5, "usualPosAcc": 2.0, "usualNegAcc": 4.5, "minGap": 2.5, "maxSpeed": 11.111, "headwayTime": 2}, "route": ["road_5_0_1", "road_5_1_2", "road_4_1_2", "road_3_1_2", "road_2_1_2", "road_1_1_3"], "interval": 1.0, "startTime": 182, "endTime": 182},
{"vehicle": {"length": 5.0, "width": 2.0, "maxPosAcc": 2.0, "maxNegAcc": 4.5, "usualPosAcc": 2.0, "usualNegAcc": 4.5, "minGap": 2.5, "maxSpeed": 11.111, "headwayTime": 2}, "route": ["road_6_0_1", "road_6_1_1", "road_6_2_0", "road_7_2_1", "road_7_3_1", "road_7_4_1", "road_7_5_1", "road_7_6_1", "road_7_7_1", "road_7_8_1", "road_7_9_1", "road_7_10_1", "road_7_11_1", "road_7_12_1", "road_7_13_1", "road_7_14_1", "road_7_15_1", "road_7_16_1", "road_7_17_1", "road_7_18_1", "road_7_19_1", "road_7_20_0"], "interval": 1.0, "startTime": 182, "endTime": 182},
{"vehicle": {"length": 5.0, "width": 2.0, "maxPosAcc": 2.0, "maxNegAcc": 4.5, "usualPosAcc": 2.0, "usualNegAcc": 4.5, "minGap": 2.5, "maxSpeed": 11.111, "headwayTime": 2}, "route": ["road_0_2_0", "road_1_2_0", "road_2_2_0", "road_3_2_0", "road_4_2_0", "road_5_2_0", "road_6_2_0", "road_7_2_1", "road_7_3_1", "road_7_4_1", "road_7_5_1", "road_7_6_1", "road_7_7_1", "road_7_8_1", "road_7_9_1", "road_7_10_1", "road_7_11_1", "road_7_12_1", "road_7_13_1", "road_7_14_1", "road_7_15_1", "road_7_16_1", "road_7_17_0"], "interval": 1.0, "startTime": 182, "endTime": 182},
{"vehicle": {"length": 5.0, "width": 2.0, "maxPosAcc": 2.0, "maxNegAcc": 4.5, "usualPosAcc": 2.0, "usualNegAcc": 4.5, "minGap": 2.5, "maxSpeed": 11.111, "headwayTime": 2}, "route": ["road_0_16_0", "road_1_16_0", "road_2_16_3", "road_2_15_3", "road_2_14_3", "road_2_13_3", "road_2_12_3", "road_2_11_3", "road_2_10_3", "road_2_9_3", "road_2_8_3", "road_2_7_3", "road_2_6_3", "road_2_5_3", "road_2_4_3", "road_2_3_3", "road_2_2_3", "road_2_1_2", "road_1_1_3"], "interval": 1.0, "startTime": 182, "endTime": 182},
{"vehicle": {"length": 5.0, "width": 2.0, "maxPosAcc": 2.0, "maxNegAcc": 4.5, "usualPosAcc": 2.0, "usualNegAcc": 4.5, "minGap": 2.5, "maxSpeed": 11.111, "headwayTime": 2}, "route": ["road_0_5_0", "road_1_5_1", "road_1_6_0", "road_2_6_3", "road_2_5_3", "road_2_4_3", "road_2_3_3", "road_2_2_3", "road_2_1_3"], "interval": 1.0, "startTime": 182, "endTime": 182},
{"vehicle": {"length": 5.0, "width": 2.0, "maxPosAcc": 2.0, "maxNegAcc": 4.5, "usualPosAcc": 2.0, "usualNegAcc": 4.5, "minGap": 2.5, "maxSpeed": 11.111, "headwayTime": 2}, "route": ["road_0_18_0", "road_1_18_0", "road_2_18_3", "road_2_17_3", "road_2_16_3", "road_2_15_3", "road_2_14_3", "road_2_13_3", "road_2_12_3", "road_2_11_3", "road_2_10_3", "road_2_9_3", "road_2_8_3", "road_2_7_3", "road_2_6_3", "road_2_5_3", "road_2_4_3", "road_2_3_3", "road_2_2_0", "road_3_2_3", "road_3_1_2", "road_2_1_3"], "interval": 1.0, "startTime": 182, "endTime": 182},
{"vehicle": {"length": 5.0, "width": 2.0, "maxPosAcc": 2.0, "maxNegAcc": 4.5, "usualPosAcc": 2.0, "usualNegAcc": 4.5, "minGap": 2.5, "maxSpeed": 11.111, "headwayTime": 2}, "route": ["road_0_11_0", "road_1_11_1", "road_1_12_0", "road_2_12_1", "road_2_13_1", "road_2_14_1", "road_2_15_1", "road_2_16_1", "road_2_17_1", "road_2_18_1", "road_2_19_1", "road_2_20_1", "road_2_21_1", "road_2_22_1", "road_2_23_1", "road_2_24_1", "road_2_25_1", "road_2_26_0", "road_3_26_0", "road_4_26_1", "road_4_27_1", "road_4_28_0", "road_5_28_1"], "interval": 1.0, "startTime": 182, "endTime": 182},
{"vehicle": {"length": 5.0, "width": 2.0, "maxPosAcc": 2.0, "maxNegAcc": 4.5, "usualPosAcc": 2.0, "usualNegAcc": 4.5, "minGap": 2.5, "maxSpeed": 11.111, "headwayTime": 2}, "route": ["road_0_12_0", "road_1_12_1", "road_1_13_1", "road_1_14_1", "road_1_15_1", "road_1_16_2"], "interval": 1.0, "startTime": 182, "endTime": 182},
{"vehicle": {"length": 5.0, "width": 2.0, "maxPosAcc": 2.0, "maxNegAcc": 4.5, "usualPosAcc": 2.0, "usualNegAcc": 4.5, "minGap": 2.5, "maxSpeed": 11.111, "headwayTime": 2}, "route": ["road_1_29_3", "road_1_28_0", "road_2_28_3", "road_2_27_2", "road_1_27_2"], "interval": 1.0, "startTime": 182, "endTime": 182},
{"vehicle": {"length": 5.0, "width": 2.0, "maxPosAcc": 2.0, "maxNegAcc": 4.5, "usualPosAcc": 2.0, "usualNegAcc": 4.5, "minGap": 2.5, "maxSpeed": 11.111, "headwayTime": 2}, "route": ["road_3_29_3", "road_3_28_3", "road_3_27_2", "road_2_27_3", "road_2_26_3", "road_2_25_3", "road_2_24_3", "road_2_23_3", "road_2_22_3", "road_2_21_3", "road_2_20_3", "road_2_19_3", "road_2_18_3", "road_2_17_3", "road_2_16_3", "road_2_15_3", "road_2_14_3", "road_2_13_3", "road_2_12_3", "road_2_11_3", "road_2_10_3", "road_2_9_3", "road_2_8_3", "road_2_7_3", "road_2_6_3", "road_2_5_3", "road_2_4_3", "road_2_3_3", "road_2_2_3", "road_2_1_2", "road_1_1_3"], "interval": 1.0, "startTime": 182, "endTime": 182},
{"vehicle": {"length": 5.0, "width": 2.0, "maxPosAcc": 2.0, "maxNegAcc": 4.5, "usualPosAcc": 2.0, "usualNegAcc": 4.5, "minGap": 2.5, "maxSpeed": 11.111, "headwayTime": 2}, "route": ["road_4_29_3", "road_4_28_0", "road_5_28_3", "road_5_27_3", "road_5_26_3", "road_5_25_2", "road_4_25_2", "road_3_25_2", "road_2_25_3", "road_2_24_3", "road_2_23_3", "road_2_22_3", "road_2_21_3", "road_2_20_3", "road_2_19_3", "road_2_18_3", "road_2_17_3", "road_2_16_3", "road_2_15_3", "road_2_14_3", "road_2_13_2", "road_1_13_2"], "interval": 1.0, "startTime": 182, "endTime": 182},
{"vehicle": {"length": 5.0, "width": 2.0, "maxPosAcc": 2.0, "maxNegAcc": 4.5, "usualPosAcc": 2.0, "usualNegAcc": 4.5, "minGap": 2.5, "maxSpeed": 11.111, "headwayTime": 2}, "route": ["road_6_29_3", "road_6_28_0", "road_7_28_3", "road_7_27_2", "road_6_27_2", "road_5_27_3", "road_5_26_3", "road_5_25_2", "road_4_25_2", "road_3_25_2", "road_2_25_3", "road_2_24_3", "road_2_23_3", "road_2_22_3", "road_2_21_2", "road_1_21_1", "road_1_22_2"], "interval": 1.0, "startTime": 182, "endTime": 182},
{"vehicle": {"length": 5.0, "width": 2.0, "maxPosAcc": 2.0, "maxNegAcc": 4.5, "usualPosAcc": 2.0, "usualNegAcc": 4.5, "minGap": 2.5, "maxSpeed": 11.111, "headwayTime": 2}, "route": ["road_0_7_0", "road_1_7_1", "road_1_8_2"], "interval": 1.0, "startTime": 182, "endTime": 182},
{"vehicle": {"length": 5.0, "width": 2.0, "maxPosAcc": 2.0, "maxNegAcc": 4.5, "usualPosAcc": 2.0, "usualNegAcc": 4.5, "minGap": 2.5, "maxSpeed": 11.111, "headwayTime": 2}, "route": ["road_0_14_0", "road_1_14_0", "road_2_14_0", "road_3_14_0", "road_4_14_0", "road_5_14_0", "road_6_14_0", "road_7_14_3", "road_7_13_3", "road_7_12_3", "road_7_11_3", "road_7_10_3", "road_7_9_3", "road_7_8_3", "road_7_7_3", "road_7_6_3", "road_7_5_3", "road_7_4_3", "road_7_3_0"], "interval": 1.0, "startTime": 182, "endTime": 182},
{"vehicle": {"length": 5.0, "width": 2.0, "maxPosAcc": 2.0, "maxNegAcc": 4.5, "usualPosAcc": 2.0, "usualNegAcc": 4.5, "minGap": 2.5, "maxSpeed": 11.111, "headwayTime": 2}, "route": ["road_0_15_0", "road_1_15_1", "road_1_16_0", "road_2_16_3", "road_2_15_3", "road_2_14_3", "road_2_13_3", "road_2_12_3", "road_2_11_3", "road_2_10_3", "road_2_9_3", "road_2_8_3", "road_2_7_3", "road_2_6_3", "road_2_5_3", "road_2_4_3", "road_2_3_3", "road_2_2_3", "road_2_1_2", "road_1_1_3"], "interval": 1.0, "startTime": 182, "endTime": 182},
{"vehicle": {"length": 5.0, "width": 2.0, "maxPosAcc": 2.0, "maxNegAcc": 4.5, "usualPosAcc": 2.0, "usualNegAcc": 4.5, "minGap": 2.5, "maxSpeed": 11.111, "headwayTime": 2}, "route": ["road_2_0_1", "road_2_1_2", "road_1_1_1", "road_1_2_1", "road_1_3_1", "road_1_4_1", "road_1_5_1", "road_1_6_1", "road_1_7_1", "road_1_8_1", "road_1_9_1", "road_1_10_1", "road_1_11_1", "road_1_12_1", "road_1_13_1", "road_1_14_1", "road_1_15_1", "road_1_16_1", "road_1_17_1", "road_1_18_1", "road_1_19_1", "road_1_20_1", "road_1_21_1", "road_1_22_1", "road_1_23_1", "road_1_24_2"], "interval": 1.0, "startTime": 182, "endTime": 182},
{"vehicle": {"length": 5.0, "width": 2.0, "maxPosAcc": 2.0, "maxNegAcc": 4.5, "usualPosAcc": 2.0, "usualNegAcc": 4.5, "minGap": 2.5, "maxSpeed": 11.111, "headwayTime": 2}, "route": ["road_2_29_3", "road_2_28_3", "road_2_27_3", "road_2_26_3", "road_2_25_3", "road_2_24_3", "road_2_23_3", "road_2_22_3", "road_2_21_3", "road_2_20_3", "road_2_19_3", "road_2_18_3", "road_2_17_3", "road_2_16_3", "road_2_15_3", "road_2_14_3", "road_2_13_3", "road_2_12_3", "road_2_11_3", "road_2_10_3", "road_2_9_3", "road_2_8_3", "road_2_7_3", "road_2_6_3", "road_2_5_3", "road_2_4_3", "road_2_3_3", "road_2_2_3", "road_2_1_3"], "interval": 1.0, "startTime": 182, "endTime": 182},
{"vehicle": {"length": 5.0, "width": 2.0, "maxPosAcc": 2.0, "maxNegAcc": 4.5, "usualPosAcc": 2.0, "usualNegAcc": 4.5, "minGap": 2.5, "maxSpeed": 11.111, "headwayTime": 2}, "route": ["road_8_23_2", "road_7_23_3", "road_7_22_3", "road_7_21_3", "road_7_20_3", "road_7_19_3", "road_7_18_3", "road_7_17_3", "road_7_16_3", "road_7_15_3", "road_7_14_0"], "interval": 1.0, "startTime": 183, "endTime": 183},
{"vehicle": {"length": 5.0, "width": 2.0, "maxPosAcc": 2.0, "maxNegAcc": 4.5, "usualPosAcc": 2.0, "usualNegAcc": 4.5, "minGap": 2.5, "maxSpeed": 11.111, "headwayTime": 2}, "route": ["road_2_0_1", "road_2_1_1", "road_2_2_0", "road_3_2_3", "road_3_1_3"], "interval": 1.0, "startTime": 183, "endTime": 183},
{"vehicle": {"length": 5.0, "width": 2.0, "maxPosAcc": 2.0, "maxNegAcc": 4.5, "usualPosAcc": 2.0, "usualNegAcc": 4.5, "minGap": 2.5, "maxSpeed": 11.111, "headwayTime": 2}, "route": ["road_0_14_0", "road_1_14_0", "road_2_14_3", "road_2_13_3", "road_2_12_3", "road_2_11_3", "road_2_10_3", "road_2_9_3", "road_2_8_3", "road_2_7_3", "road_2_6_3", "road_2_5_3", "road_2_4_3", "road_2_3_3", "road_2_2_3", "road_2_1_2", "road_1_1_3"], "interval": 1.0, "startTime": 183, "endTime": 183},
{"vehicle": {"length": 5.0, "width": 2.0, "maxPosAcc": 2.0, "maxNegAcc": 4.5, "usualPosAcc": 2.0, "usualNegAcc": 4.5, "minGap": 2.5, "maxSpeed": 11.111, "headwayTime": 2}, "route": ["road_0_26_0", "road_1_26_0", "road_2_26_3", "road_2_25_3", "road_2_24_3", "road_2_23_3", "road_2_22_3", "road_2_21_3", "road_2_20_3", "road_2_19_3", "road_2_18_3", "road_2_17_3", "road_2_16_3", "road_2_15_3", "road_2_14_3", "road_2_13_2", "road_1_13_2"], "interval": 1.0, "startTime": 184, "endTime": 184},
{"vehicle": {"length": 5.0, "width": 2.0, "maxPosAcc": 2.0, "maxNegAcc": 4.5, "usualPosAcc": 2.0, "usualNegAcc": 4.5, "minGap": 2.5, "maxSpeed": 11.111, "headwayTime": 2}, "route": ["road_0_19_0", "road_1_19_1", "road_1_20_0", "road_2_20_3", "road_2_19_3", "road_2_18_3", "road_2_17_3", "road_2_16_3", "road_2_15_3", "road_2_14_3", "road_2_13_3", "road_2_12_3", "road_2_11_3", "road_2_10_3", "road_2_9_3", "road_2_8_3", "road_2_7_3", "road_2_6_3", "road_2_5_3", "road_2_4_3", "road_2_3_3", "road_2_2_3", "road_2_1_2", "road_1_1_3"], "interval": 1.0, "startTime": 184, "endTime": 184},
{"vehicle": {"length": 5.0, "width": 2.0, "maxPosAcc": 2.0, "maxNegAcc": 4.5, "usualPosAcc": 2.0, "usualNegAcc": 4.5, "minGap": 2.5, "maxSpeed": 11.111, "headwayTime": 2}, "route": ["road_2_29_3", "road_2_28_0", "road_3_28_0", "road_4_28_0", "road_5_28_3", "road_5_27_3", "road_5_26_3", "road_5_25_3", "road_5_24_0", "road_6_24_0", "road_7_24_3", "road_7_23_0"], "interval": 1.0, "startTime": 184, "endTime": 184},
{"vehicle": {"length": 5.0, "width": 2.0, "maxPosAcc": 2.0, "maxNegAcc": 4.5, "usualPosAcc": 2.0, "usualNegAcc": 4.5, "minGap": 2.5, "maxSpeed": 11.111, "headwayTime": 2}, "route": ["road_1_0_1", "road_1_1_1", "road_1_2_0", "road_2_2_3", "road_2_1_3"], "interval": 1.0, "startTime": 186, "endTime": 186},
{"vehicle": {"length": 5.0, "width": 2.0, "maxPosAcc": 2.0, "maxNegAcc": 4.5, "usualPosAcc": 2.0, "usualNegAcc": 4.5, "minGap": 2.5, "maxSpeed": 11.111, "headwayTime": 2}, "route": ["road_4_0_1", "road_4_1_2", "road_3_1_3"], "interval": 1.0, "startTime": 186, "endTime": 186},
{"vehicle": {"length": 5.0, "width": 2.0, "maxPosAcc": 2.0, "maxNegAcc": 4.5, "usualPosAcc": 2.0, "usualNegAcc": 4.5, "minGap": 2.5, "maxSpeed": 11.111, "headwayTime": 2}, "route": ["road_5_0_1", "road_5_1_2", "road_4_1_2", "road_3_1_2", "road_2_1_2", "road_1_1_3"], "interval": 1.0, "startTime": 186, "endTime": 186},
{"vehicle": {"length": 5.0, "width": 2.0, "maxPosAcc": 2.0, "maxNegAcc": 4.5, "usualPosAcc": 2.0, "usualNegAcc": 4.5, "minGap": 2.5, "maxSpeed": 11.111, "headwayTime": 2}, "route": ["road_0_20_0", "road_1_20_0", "road_2_20_3", "road_2_19_3", "road_2_18_3", "road_2_17_3", "road_2_16_3", "road_2_15_3", "road_2_14_3", "road_2_13_3", "road_2_12_3", "road_2_11_3", "road_2_10_3", "road_2_9_3", "road_2_8_3", "road_2_7_3", "road_2_6_3", "road_2_5_3", "road_2_4_3", "road_2_3_3", "road_2_2_3", "road_2_1_2", "road_1_1_3"], "interval": 1.0, "startTime": 187, "endTime": 187},
{"vehicle": {"length": 5.0, "width": 2.0, "maxPosAcc": 2.0, "maxNegAcc": 4.5, "usualPosAcc": 2.0, "usualNegAcc": 4.5, "minGap": 2.5, "maxSpeed": 11.111, "headwayTime": 2}, "route": ["road_4_29_3", "road_4_28_0", "road_5_28_3", "road_5_27_2", "road_4_27_2", "road_3_27_2", "road_2_27_1", "road_2_28_0", "road_3_28_1"], "interval": 1.0, "startTime": 187, "endTime": 187},
{"vehicle": {"length": 5.0, "width": 2.0, "maxPosAcc": 2.0, "maxNegAcc": 4.5, "usualPosAcc": 2.0, "usualNegAcc": 4.5, "minGap": 2.5, "maxSpeed": 11.111, "headwayTime": 2}, "route": ["road_8_16_2", "road_7_16_3", "road_7_15_2", "road_6_15_2", "road_5_15_2", "road_4_15_2", "road_3_15_2", "road_2_15_3", "road_2_14_3", "road_2_13_3", "road_2_12_3", "road_2_11_3", "road_2_10_3", "road_2_9_3", "road_2_8_3", "road_2_7_2", "road_1_7_1", "road_1_8_2"], "interval": 1.0, "startTime": 188, "endTime": 188},
{"vehicle": {"length": 5.0, "width": 2.0, "maxPosAcc": 2.0, "maxNegAcc": 4.5, "usualPosAcc": 2.0, "usualNegAcc": 4.5, "minGap": 2.5, "maxSpeed": 11.111, "headwayTime": 2}, "route": ["road_1_29_3", "road_1_28_0", "road_2_28_3", "road_2_27_3", "road_2_26_3", "road_2_25_3", "road_2_24_3", "road_2_23_3", "road_2_22_3", "road_2_21_3", "road_2_20_3", "road_2_19_3", "road_2_18_3", "road_2_17_3", "road_2_16_3", "road_2_15_3", "road_2_14_3", "road_2_13_3", "road_2_12_3", "road_2_11_3", "road_2_10_3", "road_2_9_3", "road_2_8_3", "road_2_7_3", "road_2_6_3", "road_2_5_3", "road_2_4_3", "road_2_3_3", "road_2_2_3", "road_2_1_2", "road_1_1_1", "road_1_2_2"], "interval": 1.0, "startTime": 189, "endTime": 189},
{"vehicle": {"length": 5.0, "width": 2.0, "maxPosAcc": 2.0, "maxNegAcc": 4.5, "usualPosAcc": 2.0, "usualNegAcc": 4.5, "minGap": 2.5, "maxSpeed": 11.111, "headwayTime": 2}, "route": ["road_0_25_0", "road_1_25_1", "road_1_26_0", "road_2_26_1", "road_2_27_1", "road_2_28_1"], "interval": 1.0, "startTime": 189, "endTime": 189},
{"vehicle": {"length": 5.0, "width": 2.0, "maxPosAcc": 2.0, "maxNegAcc": 4.5, "usualPosAcc": 2.0, "usualNegAcc": 4.5, "minGap": 2.5, "maxSpeed": 11.111, "headwayTime": 2}, "route": ["road_3_0_1", "road_3_1_2", "road_2_1_2", "road_1_1_1", "road_1_2_1", "road_1_3_1", "road_1_4_1", "road_1_5_1", "road_1_6_1", "road_1_7_1", "road_1_8_1", "road_1_9_1", "road_1_10_1", "road_1_11_1", "road_1_12_1", "road_1_13_1", "road_1_14_1", "road_1_15_1", "road_1_16_2"], "interval": 1.0, "startTime": 190, "endTime": 190},
{"vehicle": {"length": 5.0, "width": 2.0, "maxPosAcc": 2.0, "maxNegAcc": 4.5, "usualPosAcc": 2.0, "usualNegAcc": 4.5, "minGap": 2.5, "maxSpeed": 11.111, "headwayTime": 2}, "route": ["road_0_22_0", "road_1_22_0", "road_2_22_3", "road_2_21_3", "road_2_20_3", "road_2_19_3", "road_2_18_3", "road_2_17_3", "road_2_16_3", "road_2_15_3", "road_2_14_3", "road_2_13_3", "road_2_12_3", "road_2_11_3", "road_2_10_3", "road_2_9_3", "road_2_8_3", "road_2_7_2", "road_1_7_2"], "interval": 1.0, "startTime": 190, "endTime": 190},
{"vehicle": {"length": 5.0, "width": 2.0, "maxPosAcc": 2.0, "maxNegAcc": 4.5, "usualPosAcc": 2.0, "usualNegAcc": 4.5, "minGap": 2.5, "maxSpeed": 11.111, "headwayTime": 2}, "route": ["road_0_15_0", "road_1_15_1", "road_1_16_0", "road_2_16_3", "road_2_15_3", "road_2_14_3", "road_2_13_3", "road_2_12_3", "road_2_11_3", "road_2_10_3", "road_2_9_3", "road_2_8_3", "road_2_7_3", "road_2_6_3", "road_2_5_3", "road_2_4_3", "road_2_3_3", "road_2_2_0", "road_3_2_0", "road_4_2_0", "road_5_2_3", "road_5_1_2", "road_4_1_3"], "interval": 1.0, "startTime": 191, "endTime": 191},
{"vehicle": {"length": 5.0, "width": 2.0, "maxPosAcc": 2.0, "maxNegAcc": 4.5, "usualPosAcc": 2.0, "usualNegAcc": 4.5, "minGap": 2.5, "maxSpeed": 11.111, "headwayTime": 2}, "route": ["road_8_15_2", "road_7_15_2", "road_6_15_2", "road_5_15_2", "road_4_15_2", "road_3_15_2", "road_2_15_2", "road_1_15_1", "road_1_16_1", "road_1_17_1", "road_1_18_1", "road_1_19_1", "road_1_20_1", "road_1_21_1", "road_1_22_1", "road_1_23_1", "road_1_24_2"], "interval": 1.0, "startTime": 192, "endTime": 192},
{"vehicle": {"length": 5.0, "width": 2.0, "maxPosAcc": 2.0, "maxNegAcc": 4.5, "usualPosAcc": 2.0, "usualNegAcc": 4.5, "minGap": 2.5, "maxSpeed": 11.111, "headwayTime": 2}, "route": ["road_8_27_2", "road_7_27_3", "road_7_26_3", "road_7_25_3", "road_7_24_3", "road_7_23_3", "road_7_22_3", "road_7_21_3", "road_7_20_3", "road_7_19_3", "road_7_18_3", "road_7_17_3", "road_7_16_3", "road_7_15_3", "road_7_14_3", "road_7_13_3", "road_7_12_3", "road_7_11_3", "road_7_10_3", "road_7_9_0"], "interval": 1.0, "startTime": 192, "endTime": 192},
{"vehicle": {"length": 5.0, "width": 2.0, "maxPosAcc": 2.0, "maxNegAcc": 4.5, "usualPosAcc": 2.0, "usualNegAcc": 4.5, "minGap": 2.5, "maxSpeed": 11.111, "headwayTime": 2}, "route": ["road_1_0_1", "road_1_1_1", "road_1_2_0", "road_2_2_0", "road_3_2_0", "road_4_2_0", "road_5_2_0", "road_6_2_0", "road_7_2_3", "road_7_1_2", "road_6_1_3"], "interval": 1.0, "startTime": 192, "endTime": 192},
{"vehicle": {"length": 5.0, "width": 2.0, "maxPosAcc": 2.0, "maxNegAcc": 4.5, "usualPosAcc": 2.0, "usualNegAcc": 4.5, "minGap": 2.5, "maxSpeed": 11.111, "headwayTime": 2}, "route": ["road_0_16_0", "road_1_16_1", "road_1_17_1", "road_1_18_1", "road_1_19_2"], "interval": 1.0, "startTime": 194, "endTime": 194},
{"vehicle": {"length": 5.0, "width": 2.0, "maxPosAcc": 2.0, "maxNegAcc": 4.5, "usualPosAcc": 2.0, "usualNegAcc": 4.5, "minGap": 2.5, "maxSpeed": 11.111, "headwayTime": 2}, "route": ["road_2_29_3", "road_2_28_3", "road_2_27_3", "road_2_26_3", "road_2_25_3", "road_2_24_3", "road_2_23_3", "road_2_22_3", "road_2_21_3", "road_2_20_3", "road_2_19_3", "road_2_18_3", "road_2_17_3", "road_2_16_3", "road_2_15_3", "road_2_14_3", "road_2_13_3", "road_2_12_3", "road_2_11_2", "road_1_11_1", "road_1_12_2"], "interval": 1.0, "startTime": 196, "endTime": 196},
{"vehicle": {"length": 5.0, "width": 2.0, "maxPosAcc": 2.0, "maxNegAcc": 4.5, "usualPosAcc": 2.0, "usualNegAcc": 4.5, "minGap": 2.5, "maxSpeed": 11.111, "headwayTime": 2}, "route": ["road_8_9_2", "road_7_9_2", "road_6_9_2", "road_5_9_2", "road_4_9_2", "road_3_9_2", "road_2_9_2", "road_1_9_1", "road_1_10_1", "road_1_11_1", "road_1_12_1", "road_1_13_1", "road_1_14_1", "road_1_15_1", "road_1_16_1", "road_1_17_1", "road_1_18_1", "road_1_19_1", "road_1_20_1", "road_1_21_1", "road_1_22_1", "road_1_23_1", "road_1_24_1", "road_1_25_1", "road_1_26_1", "road_1_27_1", "road_1_28_0", "road_2_28_1"], "interval": 1.0, "startTime": 197, "endTime": 197},
{"vehicle": {"length": 5.0, "width": 2.0, "maxPosAcc": 2.0, "maxNegAcc": 4.5, "usualPosAcc": 2.0, "usualNegAcc": 4.5, "minGap": 2.5, "maxSpeed": 11.111, "headwayTime": 2}, "route": ["road_0_5_0", "road_1_5_1", "road_1_6_0", "road_2_6_3", "road_2_5_3", "road_2_4_3", "road_2_3_3", "road_2_2_3", "road_2_1_2", "road_1_1_3"], "interval": 1.0, "startTime": 197, "endTime": 197},
{"vehicle": {"length": 5.0, "width": 2.0, "maxPosAcc": 2.0, "maxNegAcc": 4.5, "usualPosAcc": 2.0, "usualNegAcc": 4.5, "minGap": 2.5, "maxSpeed": 11.111, "headwayTime": 2}, "route": ["road_0_14_0", "road_1_14_0", "road_2_14_3", "road_2_13_3", "road_2_12_3", "road_2_11_3", "road_2_10_3", "road_2_9_3", "road_2_8_3", "road_2_7_3", "road_2_6_3", "road_2_5_3", "road_2_4_3", "road_2_3_3", "road_2_2_3", "road_2_1_2", "road_1_1_3"], "interval": 1.0, "startTime": 197, "endTime": 197},
{"vehicle": {"length": 5.0, "width": 2.0, "maxPosAcc": 2.0, "maxNegAcc": 4.5, "usualPosAcc": 2.0, "usualNegAcc": 4.5, "minGap": 2.5, "maxSpeed": 11.111, "headwayTime": 2}, "route": ["road_0_19_0", "road_1_19_1", "road_1_20_0", "road_2_20_3", "road_2_19_3", "road_2_18_3", "road_2_17_3", "road_2_16_3", "road_2_15_3", "road_2_14_3", "road_2_13_3", "road_2_12_3", "road_2_11_3", "road_2_10_3", "road_2_9_3", "road_2_8_3", "road_2_7_3", "road_2_6_3", "road_2_5_3", "road_2_4_3", "road_2_3_3", "road_2_2_3", "road_2_1_3"], "interval": 1.0, "startTime": 197, "endTime": 197},
{"vehicle": {"length": 5.0, "width": 2.0, "maxPosAcc": 2.0, "maxNegAcc": 4.5, "usualPosAcc": 2.0, "usualNegAcc": 4.5, "minGap": 2.5, "maxSpeed": 11.111, "headwayTime": 2}, "route": ["road_4_0_1", "road_4_1_1", "road_4_2_0", "road_5_2_0", "road_6_2_0", "road_7_2_1", "road_7_3_1", "road_7_4_1", "road_7_5_1", "road_7_6_1", "road_7_7_1", "road_7_8_1", "road_7_9_1", "road_7_10_1", "road_7_11_1", "road_7_12_1", "road_7_13_1", "road_7_14_1", "road_7_15_1", "road_7_16_1", "road_7_17_1", "road_7_18_1", "road_7_19_1", "road_7_20_1", "road_7_21_1", "road_7_22_1", "road_7_23_1", "road_7_24_1", "road_7_25_0"], "interval": 1.0, "startTime": 198, "endTime": 198},
{"vehicle": {"length": 5.0, "width": 2.0, "maxPosAcc": 2.0, "maxNegAcc": 4.5, "usualPosAcc": 2.0, "usualNegAcc": 4.5, "minGap": 2.5, "maxSpeed": 11.111, "headwayTime": 2}, "route": ["road_8_26_2", "road_7_26_3", "road_7_25_2", "road_6_25_2", "road_5_25_2", "road_4_25_2", "road_3_25_2", "road_2_25_3", "road_2_24_3", "road_2_23_3", "road_2_22_3", "road_2_21_3", "road_2_20_3", "road_2_19_3", "road_2_18_3", "road_2_17_2", "road_1_17_2"], "interval": 1.0, "startTime": 199, "endTime": 199},
{"vehicle": {"length": 5.0, "width": 2.0, "maxPosAcc": 2.0, "maxNegAcc": 4.5, "usualPosAcc": 2.0, "usualNegAcc": 4.5, "minGap": 2.5, "maxSpeed": 11.111, "headwayTime": 2}, "route": ["road_2_0_1", "road_2_1_2", "road_1_1_1", "road_1_2_0", "road_2_2_0", "road_3_2_3", "road_3_1_2", "road_2_1_3"], "interval": 1.0, "startTime": 199, "endTime": 199},
{"vehicle": {"length": 5.0, "width": 2.0, "maxPosAcc": 2.0, "maxNegAcc": 4.5, "usualPosAcc": 2.0, "usualNegAcc": 4.5, "minGap": 2.5, "maxSpeed": 11.111, "headwayTime": 2}, "route": ["road_8_20_2", "road_7_20_3", "road_7_19_3", "road_7_18_3", "road_7_17_3", "road_7_16_3", "road_7_15_3", "road_7_14_3", "road_7_13_3", "road_7_12_3", "road_7_11_3", "road_7_10_2", "road_6_10_2", "road_5_10_2", "road_4_10_2", "road_3_10_2", "road_2_10_2", "road_1_10_2"], "interval": 1.0, "startTime": 200, "endTime": 200},
{"vehicle": {"length": 5.0, "width": 2.0, "maxPosAcc": 2.0, "maxNegAcc": 4.5, "usualPosAcc": 2.0, "usualNegAcc": 4.5, "minGap": 2.5, "maxSpeed": 11.111, "headwayTime": 2}, "route": ["road_0_16_0", "road_1_16_0", "road_2_16_3", "road_2_15_3", "road_2_14_3", "road_2_13_3", "road_2_12_3", "road_2_11_3", "road_2_10_3", "road_2_9_3", "road_2_8_3", "road_2_7_3", "road_2_6_3", "road_2_5_3", "road_2_4_3", "road_2_3_3", "road_2_2_0", "road_3_2_3", "road_3_1_3"], "interval": 1.0, "startTime": 200, "endTime": 200},
{"vehicle": {"length": 5.0, "width": 2.0, "maxPosAcc": 2.0, "maxNegAcc": 4.5, "usualPosAcc": 2.0, "usualNegAcc": 4.5, "minGap": 2.5, "maxSpeed": 11.111, "headwayTime": 2}, "route": ["road_8_5_2", "road_7_5_2", "road_6_5_2", "road_5_5_2", "road_4_5_2", "road_3_5_2", "road_2_5_2", "road_1_5_1", "road_1_6_2"], "interval": 1.0, "startTime": 201, "endTime": 201},
{"vehicle": {"length": 5.0, "width": 2.0, "maxPosAcc": 2.0, "maxNegAcc": 4.5, "usualPosAcc": 2.0, "usualNegAcc": 4.5, "minGap": 2.5, "maxSpeed": 11.111, "headwayTime": 2}, "route": ["road_0_24_0", "road_1_24_0", "road_2_24_3", "road_2_23_3", "road_2_22_3", "road_2_21_3", "road_2_20_3", "road_2_19_3", "road_2_18_3", "road_2_17_3", "road_2_16_3", "road_2_15_3", "road_2_14_3", "road_2_13_3", "road_2_12_3", "road_2_11_3", "road_2_10_3", "road_2_9_3", "road_2_8_3", "road_2_7_3", "road_2_6_3", "road_2_5_3", "road_2_4_3", "road_2_3_3", "road_2_2_3", "road_2_1_2", "road_1_1_3"], "interval": 1.0, "startTime": 202, "endTime": 202},
{"vehicle": {"length": 5.0, "width": 2.0, "maxPosAcc": 2.0, "maxNegAcc": 4.5, "usualPosAcc": 2.0, "usualNegAcc": 4.5, "minGap": 2.5, "maxSpeed": 11.111, "headwayTime": 2}, "route": ["road_5_29_3", "road_5_28_0", "road_6_28_1"], "interval": 1.0, "startTime": 202, "endTime": 202},
{"vehicle": {"length": 5.0, "width": 2.0, "maxPosAcc": 2.0, "maxNegAcc": 4.5, "usualPosAcc": 2.0, "usualNegAcc": 4.5, "minGap": 2.5, "maxSpeed": 11.111, "headwayTime": 2}, "route": ["road_0_8_0", "road_1_8_0", "road_2_8_3", "road_2_7_3", "road_2_6_3", "road_2_5_3", "road_2_4_3", "road_2_3_3", "road_2_2_3", "road_2_1_2", "road_1_1_3"], "interval": 1.0, "startTime": 203, "endTime": 203},
{"vehicle": {"length": 5.0, "width": 2.0, "maxPosAcc": 2.0, "maxNegAcc": 4.5, "usualPosAcc": 2.0, "usualNegAcc": 4.5, "minGap": 2.5, "maxSpeed": 11.111, "headwayTime": 2}, "route": ["road_6_0_1", "road_6_1_1", "road_6_2_1", "road_6_3_1", "road_6_4_1", "road_6_5_2", "road_5_5_2", "road_4_5_2", "road_3_5_2", "road_2_5_2", "road_1_5_1", "road_1_6_1", "road_1_7_1", "road_1_8_1", "road_1_9_1", "road_1_10_1", "road_1_11_1", "road_1_12_1", "road_1_13_1", "road_1_14_1", "road_1_15_1", "road_1_16_1", "road_1_17_1", "road_1_18_1", "road_1_19_2"], "interval": 1.0, "startTime": 203, "endTime": 203},
{"vehicle": {"length": 5.0, "width": 2.0, "maxPosAcc": 2.0, "maxNegAcc": 4.5, "usualPosAcc": 2.0, "usualNegAcc": 4.5, "minGap": 2.5, "maxSpeed": 11.111, "headwayTime": 2}, "route": ["road_5_29_3", "road_5_28_3", "road_5_27_3", "road_5_26_3", "road_5_25_3", "road_5_24_3", "road_5_23_3", "road_5_22_3", "road_5_21_3", "road_5_20_3", "road_5_19_3", "road_5_18_3", "road_5_17_3", "road_5_16_3", "road_5_15_3", "road_5_14_3", "road_5_13_3", "road_5_12_3", "road_5_11_3", "road_5_10_3", "road_5_9_3", "road_5_8_3", "road_5_7_3", "road_5_6_3", "road_5_5_3", "road_5_4_3", "road_5_3_3", "road_5_2_3", "road_5_1_2", "road_4_1_3"], "interval": 1.0, "startTime": 203, "endTime": 203},
{"vehicle": {"length": 5.0, "width": 2.0, "maxPosAcc": 2.0, "maxNegAcc": 4.5, "usualPosAcc": 2.0, "usualNegAcc": 4.5, "minGap": 2.5, "maxSpeed": 11.111, "headwayTime": 2}, "route": ["road_3_0_1", "road_3_1_2", "road_2_1_2", "road_1_1_1", "road_1_2_1", "road_1_3_2"], "interval": 1.0, "startTime": 204, "endTime": 204},
{"vehicle": {"length": 5.0, "width": 2.0, "maxPosAcc": 2.0, "maxNegAcc": 4.5, "usualPosAcc": 2.0, "usualNegAcc": 4.5, "minGap": 2.5, "maxSpeed": 11.111, "headwayTime": 2}, "route": ["road_0_9_0", "road_1_9_1", "road_1_10_1", "road_1_11_1", "road_1_12_1", "road_1_13_1", "road_1_14_1", "road_1_15_1", "road_1_16_1", "road_1_17_1", "road_1_18_1", "road_1_19_1", "road_1_20_1", "road_1_21_1", "road_1_22_1", "road_1_23_1", "road_1_24_1", "road_1_25_1", "road_1_26_1", "road_1_27_1", "road_1_28_0", "road_2_28_1"], "interval": 1.0, "startTime": 204, "endTime": 204},
{"vehicle": {"length": 5.0, "width": 2.0, "maxPosAcc": 2.0, "maxNegAcc": 4.5, "usualPosAcc": 2.0, "usualNegAcc": 4.5, "minGap": 2.5, "maxSpeed": 11.111, "headwayTime": 2}, "route": ["road_3_0_1", "road_3_1_2", "road_2_1_1", "road_2_2_0", "road_3_2_0", "road_4_2_0", "road_5_2_0", "road_6_2_0", "road_7_2_1", "road_7_3_1", "road_7_4_1", "road_7_5_1", "road_7_6_1", "road_7_7_1", "road_7_8_1", "road_7_9_1", "road_7_10_1", "road_7_11_1", "road_7_12_1", "road_7_13_1", "road_7_14_1", "road_7_15_1", "road_7_16_1", "road_7_17_1", "road_7_18_1", "road_7_19_1", "road_7_20_1", "road_7_21_1", "road_7_22_1", "road_7_23_1", "road_7_24_0"], "interval": 1.0, "startTime": 205, "endTime": 205},
{"vehicle": {"length": 5.0, "width": 2.0, "maxPosAcc": 2.0, "maxNegAcc": 4.5, "usualPosAcc": 2.0, "usualNegAcc": 4.5, "minGap": 2.5, "maxSpeed": 11.111, "headwayTime": 2}, "route": ["road_0_7_0", "road_1_7_1", "road_1_8_1", "road_1_9_1", "road_1_10_1", "road_1_11_1", "road_1_12_1", "road_1_13_1", "road_1_14_1", "road_1_15_1", "road_1_16_1", "road_1_17_1", "road_1_18_1", "road_1_19_1", "road_1_20_1", "road_1_21_1", "road_1_22_1", "road_1_23_1", "road_1_24_1", "road_1_25_1", "road_1_26_1", "road_1_27_1", "road_1_28_1"], "interval": 1.0, "startTime": 205, "endTime": 205},
{"vehicle": {"length": 5.0, "width": 2.0, "maxPosAcc": 2.0, "maxNegAcc": 4.5, "usualPosAcc": 2.0, "usualNegAcc": 4.5, "minGap": 2.5, "maxSpeed": 11.111, "headwayTime": 2}, "route": ["road_0_25_0", "road_1_25_1", "road_1_26_0", "road_2_26_3", "road_2_25_3", "road_2_24_3", "road_2_23_3", "road_2_22_3", "road_2_21_3", "road_2_20_3", "road_2_19_3", "road_2_18_3", "road_2_17_3", "road_2_16_3", "road_2_15_3", "road_2_14_3", "road_2_13_3", "road_2_12_3", "road_2_11_2", "road_1_11_2"], "interval": 1.0, "startTime": 205, "endTime": 205},
{"vehicle": {"length": 5.0, "width": 2.0, "maxPosAcc": 2.0, "maxNegAcc": 4.5, "usualPosAcc": 2.0, "usualNegAcc": 4.5, "minGap": 2.5, "maxSpeed": 11.111, "headwayTime": 2}, "route": ["road_3_0_1", "road_3_1_2", "road_2_1_1", "road_2_2_0", "road_3_2_0", "road_4_2_0", "road_5_2_3", "road_5_1_2", "road_4_1_3"], "interval": 1.0, "startTime": 207, "endTime": 207},
{"vehicle": {"length": 5.0, "width": 2.0, "maxPosAcc": 2.0, "maxNegAcc": 4.5, "usualPosAcc": 2.0, "usualNegAcc": 4.5, "minGap": 2.5, "maxSpeed": 11.111, "headwayTime": 2}, "route": ["road_0_6_0", "road_1_6_1", "road_1_7_1", "road_1_8_0", "road_2_8_1", "road_2_9_1", "road_2_10_1", "road_2_11_1", "road_2_12_1", "road_2_13_1", "road_2_14_1", "road_2_15_1", "road_2_16_1", "road_2_17_1", "road_2_18_1", "road_2_19_1", "road_2_20_1", "road_2_21_1", "road_2_22_1", "road_2_23_1", "road_2_24_1", "road_2_25_1", "road_2_26_1", "road_2_27_1", "road_2_28_0", "road_3_28_1"], "interval": 1.0, "startTime": 207, "endTime": 207},
{"vehicle": {"length": 5.0, "width": 2.0, "maxPosAcc": 2.0, "maxNegAcc": 4.5, "usualPosAcc": 2.0, "usualNegAcc": 4.5, "minGap": 2.5, "maxSpeed": 11.111, "headwayTime": 2}, "route": ["road_0_22_0", "road_1_22_0", "road_2_22_0", "road_3_22_0", "road_4_22_0", "road_5_22_0", "road_6_22_0", "road_7_22_1", "road_7_23_1", "road_7_24_1", "road_7_25_1", "road_7_26_1", "road_7_27_0"], "interval": 1.0, "startTime": 207, "endTime": 207},
{"vehicle": {"length": 5.0, "width": 2.0, "maxPosAcc": 2.0, "maxNegAcc": 4.5, "usualPosAcc": 2.0, "usualNegAcc": 4.5, "minGap": 2.5, "maxSpeed": 11.111, "headwayTime": 2}, "route": ["road_3_29_3", "road_3_28_3", "road_3_27_2", "road_2_27_3", "road_2_26_3", "road_2_25_3", "road_2_24_3", "road_2_23_3", "road_2_22_3", "road_2_21_3", "road_2_20_3", "road_2_19_3", "road_2_18_3", "road_2_17_3", "road_2_16_3", "road_2_15_3", "road_2_14_3", "road_2_13_3", "road_2_12_3", "road_2_11_3", "road_2_10_3", "road_2_9_3", "road_2_8_3", "road_2_7_3", "road_2_6_3", "road_2_5_3", "road_2_4_3", "road_2_3_3", "road_2_2_3", "road_2_1_2", "road_1_1_3"], "interval": 1.0, "startTime": 207, "endTime": 207},
{"vehicle": {"length": 5.0, "width": 2.0, "maxPosAcc": 2.0, "maxNegAcc": 4.5, "usualPosAcc": 2.0, "usualNegAcc": 4.5, "minGap": 2.5, "maxSpeed": 11.111, "headwayTime": 2}, "route": ["road_2_29_3", "road_2_28_3", "road_2_27_3", "road_2_26_3", "road_2_25_3", "road_2_24_3", "road_2_23_3", "road_2_22_3", "road_2_21_3", "road_2_20_3", "road_2_19_3", "road_2_18_3", "road_2_17_3", "road_2_16_3", "road_2_15_3", "road_2_14_3", "road_2_13_3", "road_2_12_3", "road_2_11_3", "road_2_10_3", "road_2_9_3", "road_2_8_3", "road_2_7_3", "road_2_6_3", "road_2_5_3", "road_2_4_3", "road_2_3_3", "road_2_2_3", "road_2_1_2", "road_1_1_3"], "interval": 1.0, "startTime": 207, "endTime": 207},
{"vehicle": {"length": 5.0, "width": 2.0, "maxPosAcc": 2.0, "maxNegAcc": 4.5, "usualPosAcc": 2.0, "usualNegAcc": 4.5, "minGap": 2.5, "maxSpeed": 11.111, "headwayTime": 2}, "route": ["road_8_15_2", "road_7_15_2", "road_6_15_2", "road_5_15_2", "road_4_15_2", "road_3_15_2", "road_2_15_2", "road_1_15_1", "road_1_16_1", "road_1_17_1", "road_1_18_2"], "interval": 1.0, "startTime": 209, "endTime": 209},
{"vehicle": {"length": 5.0, "width": 2.0, "maxPosAcc": 2.0, "maxNegAcc": 4.5, "usualPosAcc": 2.0, "usualNegAcc": 4.5, "minGap": 2.5, "maxSpeed": 11.111, "headwayTime": 2}, "route": ["road_1_0_1", "road_1_1_1", "road_1_2_2"], "interval": 1.0, "startTime": 209, "endTime": 209},
{"vehicle": {"length": 5.0, "width": 2.0, "maxPosAcc": 2.0, "maxNegAcc": 4.5, "usualPosAcc": 2.0, "usualNegAcc": 4.5, "minGap": 2.5, "maxSpeed": 11.111, "headwayTime": 2}, "route": ["road_5_0_1", "road_5_1_2", "road_4_1_2", "road_3_1_2", "road_2_1_2", "road_1_1_3"], "interval": 1.0, "startTime": 209, "endTime": 209},
{"vehicle": {"length": 5.0, "width": 2.0, "maxPosAcc": 2.0, "maxNegAcc": 4.5, "usualPosAcc": 2.0, "usualNegAcc": 4.5, "minGap": 2.5, "maxSpeed": 11.111, "headwayTime": 2}, "route": ["road_8_9_2", "road_7_9_1", "road_7_10_1", "road_7_11_1", "road_7_12_1", "road_7_13_0"], "interval": 1.0, "startTime": 210, "endTime": 210},
{"vehicle": {"length": 5.0, "width": 2.0, "maxPosAcc": 2.0, "maxNegAcc": 4.5, "usualPosAcc": 2.0, "usualNegAcc": 4.5, "minGap": 2.5, "maxSpeed": 11.111, "headwayTime": 2}, "route": ["road_8_19_2", "road_7_19_3", "road_7_18_3", "road_7_17_3", "road_7_16_3", "road_7_15_3", "road_7_14_3", "road_7_13_3", "road_7_12_3", "road_7_11_3", "road_7_10_3", "road_7_9_3", "road_7_8_0"], "interval": 1.0, "startTime": 210, "endTime": 210},
{"vehicle": {"length": 5.0, "width": 2.0, "maxPosAcc": 2.0, "maxNegAcc": 4.5, "usualPosAcc": 2.0, "usualNegAcc": 4.5, "minGap": 2.5, "maxSpeed": 11.111, "headwayTime": 2}, "route": ["road_3_0_1", "road_3_1_2", "road_2_1_2", "road_1_1_3"], "interval": 1.0, "startTime": 210, "endTime": 210},
{"vehicle": {"length": 5.0, "width": 2.0, "maxPosAcc": 2.0, "maxNegAcc": 4.5, "usualPosAcc": 2.0, "usualNegAcc": 4.5, "minGap": 2.5, "maxSpeed": 11.111, "headwayTime": 2}, "route": ["road_8_7_2", "road_7_7_1", "road_7_8_1", "road_7_9_1", "road_7_10_1", "road_7_11_1", "road_7_12_0"], "interval": 1.0, "startTime": 211, "endTime": 211},
{"vehicle": {"length": 5.0, "width": 2.0, "maxPosAcc": 2.0, "maxNegAcc": 4.5, "usualPosAcc": 2.0, "usualNegAcc": 4.5, "minGap": 2.5, "maxSpeed": 11.111, "headwayTime": 2}, "route": ["road_8_20_2", "road_7_20_1", "road_7_21_2", "road_6_21_1", "road_6_22_1", "road_6_23_2", "road_5_23_2", "road_4_23_2", "road_3_23_2", "road_2_23_2", "road_1_23_1", "road_1_24_2"], "interval": 1.0, "startTime": 211, "endTime": 211},
{"vehicle": {"length": 5.0, "width": 2.0, "maxPosAcc": 2.0, "maxNegAcc": 4.5, "usualPosAcc": 2.0, "usualNegAcc": 4.5, "minGap": 2.5, "maxSpeed": 11.111, "headwayTime": 2}, "route": ["road_0_12_0", "road_1_12_0", "road_2_12_3", "road_2_11_3", "road_2_10_3", "road_2_9_3", "road_2_8_3", "road_2_7_3", "road_2_6_3", "road_2_5_3", "road_2_4_3", "road_2_3_3", "road_2_2_3", "road_2_1_2", "road_1_1_3"], "interval": 1.0, "startTime": 211, "endTime": 211},
{"vehicle": {"length": 5.0, "width": 2.0, "maxPosAcc": 2.0, "maxNegAcc": 4.5, "usualPosAcc": 2.0, "usualNegAcc": 4.5, "minGap": 2.5, "maxSpeed": 11.111, "headwayTime": 2}, "route": ["road_8_24_2", "road_7_24_3", "road_7_23_2", "road_6_23_2", "road_5_23_2", "road_4_23_2", "road_3_23_2", "road_2_23_3", "road_2_22_3", "road_2_21_3", "road_2_20_3", "road_2_19_3", "road_2_18_3", "road_2_17_3", "road_2_16_3", "road_2_15_3", "road_2_14_3", "road_2_13_2", "road_1_13_2"], "interval": 1.0, "startTime": 212, "endTime": 212},
{"vehicle": {"length": 5.0, "width": 2.0, "maxPosAcc": 2.0, "maxNegAcc": 4.5, "usualPosAcc": 2.0, "usualNegAcc": 4.5, "minGap": 2.5, "maxSpeed": 11.111, "headwayTime": 2}, "route": ["road_2_29_3", "road_2_28_0", "road_3_28_3", "road_3_27_3", "road_3_26_3", "road_3_25_3", "road_3_24_3", "road_3_23_3", "road_3_22_3", "road_3_21_3", "road_3_20_3", "road_3_19_3", "road_3_18_3", "road_3_17_3", "road_3_16_3", "road_3_15_3", "road_3_14_3", "road_3_13_3", "road_3_12_3", "road_3_11_3", "road_3_10_3", "road_3_9_3", "road_3_8_3", "road_3_7_3", "road_3_6_3", "road_3_5_3", "road_3_4_3", "road_3_3_3", "road_3_2_3", "road_3_1_2", "road_2_1_3"], "interval": 1.0, "startTime": 212, "endTime": 212},
{"vehicle": {"length": 5.0, "width": 2.0, "maxPosAcc": 2.0, "maxNegAcc": 4.5, "usualPosAcc": 2.0, "usualNegAcc": 4.5, "minGap": 2.5, "maxSpeed": 11.111, "headwayTime": 2}, "route": ["road_8_12_2", "road_7_12_3", "road_7_11_3", "road_7_10_3", "road_7_9_3", "road_7_8_3", "road_7_7_3", "road_7_6_3", "road_7_5_3", "road_7_4_3", "road_7_3_3", "road_7_2_3", "road_7_1_2", "road_6_1_3"], "interval": 1.0, "startTime": 213, "endTime": 213},
{"vehicle": {"length": 5.0, "width": 2.0, "maxPosAcc": 2.0, "maxNegAcc": 4.5, "usualPosAcc": 2.0, "usualNegAcc": 4.5, "minGap": 2.5, "maxSpeed": 11.111, "headwayTime": 2}, "route": ["road_0_20_0", "road_1_20_0", "road_2_20_1", "road_2_21_1", "road_2_22_1", "road_2_23_1", "road_2_24_1", "road_2_25_1", "road_2_26_0", "road_3_26_0", "road_4_26_1", "road_4_27_1", "road_4_28_1"], "interval": 1.0, "startTime": 213, "endTime": 213},
{"vehicle": {"length": 5.0, "width": 2.0, "maxPosAcc": 2.0, "maxNegAcc": 4.5, "usualPosAcc": 2.0, "usualNegAcc": 4.5, "minGap": 2.5, "maxSpeed": 11.111, "headwayTime": 2}, "route": ["road_1_0_1", "road_1_1_1", "road_1_2_2"], "interval": 1.0, "startTime": 214, "endTime": 214},
{"vehicle": {"length": 5.0, "width": 2.0, "maxPosAcc": 2.0, "maxNegAcc": 4.5, "usualPosAcc": 2.0, "usualNegAcc": 4.5, "minGap": 2.5, "maxSpeed": 11.111, "headwayTime": 2}, "route": ["road_0_16_0", "road_1_16_0", "road_2_16_3", "road_2_15_3", "road_2_14_3", "road_2_13_3", "road_2_12_3", "road_2_11_2", "road_1_11_1", "road_1_12_2"], "interval": 1.0, "startTime": 215, "endTime": 215},
{"vehicle": {"length": 5.0, "width": 2.0, "maxPosAcc": 2.0, "maxNegAcc": 4.5, "usualPosAcc": 2.0, "usualNegAcc": 4.5, "minGap": 2.5, "maxSpeed": 11.111, "headwayTime": 2}, "route": ["road_2_0_1", "road_2_1_2", "road_1_1_1", "road_1_2_0", "road_2_2_1", "road_2_3_1", "road_2_4_1", "road_2_5_1", "road_2_6_1", "road_2_7_1", "road_2_8_1", "road_2_9_1", "road_2_10_1", "road_2_11_1", "road_2_12_1", "road_2_13_1", "road_2_14_1", "road_2_15_1", "road_2_16_1", "road_2_17_1", "road_2_18_1", "road_2_19_1", "road_2_20_1", "road_2_21_1", "road_2_22_1", "road_2_23_1", "road_2_24_1", "road_2_25_1", "road_2_26_1", "road_2_27_1", "road_2_28_1"], "interval": 1.0, "startTime": 215, "endTime": 215},
{"vehicle": {"length": 5.0, "width": 2.0, "maxPosAcc": 2.0, "maxNegAcc": 4.5, "usualPosAcc": 2.0, "usualNegAcc": 4.5, "minGap": 2.5, "maxSpeed": 11.111, "headwayTime": 2}, "route": ["road_4_0_1", "road_4_1_2", "road_3_1_2", "road_2_1_2", "road_1_1_3"], "interval": 1.0, "startTime": 216, "endTime": 216},
{"vehicle": {"length": 5.0, "width": 2.0, "maxPosAcc": 2.0, "maxNegAcc": 4.5, "usualPosAcc": 2.0, "usualNegAcc": 4.5, "minGap": 2.5, "maxSpeed": 11.111, "headwayTime": 2}, "route": ["road_0_15_0", "road_1_15_1", "road_1_16_0", "road_2_16_3", "road_2_15_3", "road_2_14_3", "road_2_13_3", "road_2_12_3", "road_2_11_3", "road_2_10_3", "road_2_9_3", "road_2_8_3", "road_2_7_3", "road_2_6_3", "road_2_5_3", "road_2_4_3", "road_2_3_3", "road_2_2_3", "road_2_1_2", "road_1_1_3"], "interval": 1.0, "startTime": 216, "endTime": 216},
{"vehicle": {"length": 5.0, "width": 2.0, "maxPosAcc": 2.0, "maxNegAcc": 4.5, "usualPosAcc": 2.0, "usualNegAcc": 4.5, "minGap": 2.5, "maxSpeed": 11.111, "headwayTime": 2}, "route": ["road_7_0_1", "road_7_1_1", "road_7_2_1", "road_7_3_1", "road_7_4_1", "road_7_5_1", "road_7_6_1", "road_7_7_1", "road_7_8_1", "road_7_9_1", "road_7_10_1", "road_7_11_1", "road_7_12_1", "road_7_13_1", "road_7_14_1", "road_7_15_1", "road_7_16_1", "road_7_17_1", "road_7_18_1", "road_7_19_1", "road_7_20_0"], "interval": 1.0, "startTime": 217, "endTime": 217},
{"vehicle": {"length": 5.0, "width": 2.0, "maxPosAcc": 2.0, "maxNegAcc": 4.5, "usualPosAcc": 2.0, "usualNegAcc": 4.5, "minGap": 2.5, "maxSpeed": 11.111, "headwayTime": 2}, "route": ["road_1_0_1", "road_1_1_1", "road_1_2_1", "road_1_3_1", "road_1_4_1", "road_1_5_1", "road_1_6_1", "road_1_7_1", "road_1_8_1", "road_1_9_1", "road_1_10_1", "road_1_11_1", "road_1_12_1", "road_1_13_1", "road_1_14_1", "road_1_15_1", "road_1_16_1", "road_1_17_1", "road_1_18_1", "road_1_19_1", "road_1_20_1", "road_1_21_1", "road_1_22_1", "road_1_23_1", "road_1_24_1", "road_1_25_1", "road_1_26_1", "road_1_27_1", "road_1_28_0", "road_2_28_1"], "interval": 1.0, "startTime": 217, "endTime": 217},
{"vehicle": {"length": 5.0, "width": 2.0, "maxPosAcc": 2.0, "maxNegAcc": 4.5, "usualPosAcc": 2.0, "usualNegAcc": 4.5, "minGap": 2.5, "maxSpeed": 11.111, "headwayTime": 2}, "route": ["road_0_16_0", "road_1_16_0", "road_2_16_3", "road_2_15_3", "road_2_14_3", "road_2_13_3", "road_2_12_3", "road_2_11_3", "road_2_10_3", "road_2_9_3", "road_2_8_3", "road_2_7_3", "road_2_6_3", "road_2_5_2", "road_1_5_2"], "interval": 1.0, "startTime": 217, "endTime": 217},
{"vehicle": {"length": 5.0, "width": 2.0, "maxPosAcc": 2.0, "maxNegAcc": 4.5, "usualPosAcc": 2.0, "usualNegAcc": 4.5, "minGap": 2.5, "maxSpeed": 11.111, "headwayTime": 2}, "route": ["road_0_24_0", "road_1_24_0", "road_2_24_3", "road_2_23_3", "road_2_22_3", "road_2_21_3", "road_2_20_3", "road_2_19_3", "road_2_18_3", "road_2_17_3", "road_2_16_3", "road_2_15_3", "road_2_14_3", "road_2_13_3", "road_2_12_3", "road_2_11_3", "road_2_10_3", "road_2_9_3", "road_2_8_3", "road_2_7_3", "road_2_6_3", "road_2_5_3", "road_2_4_3", "road_2_3_3", "road_2_2_0", "road_3_2_0", "road_4_2_0", "road_5_2_3", "road_5_1_2", "road_4_1_3"], "interval": 1.0, "startTime": 218, "endTime": 218},
{"vehicle": {"length": 5.0, "width": 2.0, "maxPosAcc": 2.0, "maxNegAcc": 4.5, "usualPosAcc": 2.0, "usualNegAcc": 4.5, "minGap": 2.5, "maxSpeed": 11.111, "headwayTime": 2}, "route": ["road_1_0_1", "road_1_1_1", "road_1_2_0", "road_2_2_0", "road_3_2_0", "road_4_2_0", "road_5_2_0", "road_6_2_0", "road_7_2_3", "road_7_1_3"], "interval": 1.0, "startTime": 219, "endTime": 219},
{"vehicle": {"length": 5.0, "width": 2.0, "maxPosAcc": 2.0, "maxNegAcc": 4.5, "usualPosAcc": 2.0, "usualNegAcc": 4.5, "minGap": 2.5, "maxSpeed": 11.111, "headwayTime": 2}, "route": ["road_2_0_1", "road_2_1_2", "road_1_1_1", "road_1_2_1", "road_1_3_1", "road_1_4_1", "road_1_5_1", "road_1_6_1", "road_1_7_1", "road_1_8_1", "road_1_9_1", "road_1_10_1", "road_1_11_1", "road_1_12_1", "road_1_13_1", "road_1_14_1", "road_1_15_1", "road_1_16_1", "road_1_17_1", "road_1_18_1", "road_1_19_1", "road_1_20_1", "road_1_21_1", "road_1_22_1", "road_1_23_1", "road_1_24_1", "road_1_25_1", "road_1_26_1", "road_1_27_1", "road_1_28_0", "road_2_28_1"], "interval": 1.0, "startTime": 219, "endTime": 219},
{"vehicle": {"length": 5.0, "width": 2.0, "maxPosAcc": 2.0, "maxNegAcc": 4.5, "usualPosAcc": 2.0, "usualNegAcc": 4.5, "minGap": 2.5, "maxSpeed": 11.111, "headwayTime": 2}, "route": ["road_7_29_3", "road_7_28_3", "road_7_27_2", "road_6_27_2", "road_5_27_3", "road_5_26_3", "road_5_25_2", "road_4_25_2", "road_3_25_2", "road_2_25_3", "road_2_24_3", "road_2_23_3", "road_2_22_3", "road_2_21_3", "road_2_20_3", "road_2_19_3", "road_2_18_3", "road_2_17_3", "road_2_16_3", "road_2_15_3", "road_2_14_3", "road_2_13_3", "road_2_12_3", "road_2_11_2", "road_1_11_2"], "interval": 1.0, "startTime": 220, "endTime": 220},
{"vehicle": {"length": 5.0, "width": 2.0, "maxPosAcc": 2.0, "maxNegAcc": 4.5, "usualPosAcc": 2.0, "usualNegAcc": 4.5, "minGap": 2.5, "maxSpeed": 11.111, "headwayTime": 2}, "route": ["road_6_0_1", "road_6_1_1", "road_6_2_0", "road_7_2_1", "road_7_3_1", "road_7_4_1", "road_7_5_1", "road_7_6_1", "road_7_7_1", "road_7_8_1", "road_7_9_1", "road_7_10_1", "road_7_11_1", "road_7_12_1", "road_7_13_1", "road_7_14_1", "road_7_15_1", "road_7_16_1", "road_7_17_1", "road_7_18_1", "road_7_19_1", "road_7_20_1", "road_7_21_1", "road_7_22_1", "road_7_23_1", "road_7_24_1", "road_7_25_1", "road_7_26_1", "road_7_27_1", "road_7_28_1"], "interval": 1.0, "startTime": 220, "endTime": 220},
{"vehicle": {"length": 5.0, "width": 2.0, "maxPosAcc": 2.0, "maxNegAcc": 4.5, "usualPosAcc": 2.0, "usualNegAcc": 4.5, "minGap": 2.5, "maxSpeed": 11.111, "headwayTime": 2}, "route": ["road_0_16_0", "road_1_16_0", "road_2_16_0", "road_3_16_0", "road_4_16_0", "road_5_16_0", "road_6_16_0", "road_7_16_3", "road_7_15_3", "road_7_14_3", "road_7_13_3", "road_7_12_3", "road_7_11_3", "road_7_10_3", "road_7_9_0"], "interval": 1.0, "startTime": 220, "endTime": 220},
{"vehicle": {"length": 5.0, "width": 2.0, "maxPosAcc": 2.0, "maxNegAcc": 4.5, "usualPosAcc": 2.0, "usualNegAcc": 4.5, "minGap": 2.5, "maxSpeed": 11.111, "headwayTime": 2}, "route": ["road_1_29_3", "road_1_28_0", "road_2_28_3", "road_2_27_3", "road_2_26_3", "road_2_25_3", "road_2_24_3", "road_2_23_3", "road_2_22_3", "road_2_21_3", "road_2_20_3", "road_2_19_3", "road_2_18_3", "road_2_17_3", "road_2_16_3", "road_2_15_3", "road_2_14_3", "road_2_13_3", "road_2_12_3", "road_2_11_3", "road_2_10_3", "road_2_9_3", "road_2_8_3", "road_2_7_2", "road_1_7_2"], "interval": 1.0, "startTime": 220, "endTime": 220},
{"vehicle": {"length": 5.0, "width": 2.0, "maxPosAcc": 2.0, "maxNegAcc": 4.5, "usualPosAcc": 2.0, "usualNegAcc": 4.5, "minGap": 2.5, "maxSpeed": 11.111, "headwayTime": 2}, "route": ["road_7_0_1", "road_7_1_2", "road_6_1_2", "road_5_1_2", "road_4_1_2", "road_3_1_2", "road_2_1_2", "road_1_1_1", "road_1_2_1", "road_1_3_1", "road_1_4_2"], "interval": 1.0, "startTime": 221, "endTime": 221},
{"vehicle": {"length": 5.0, "width": 2.0, "maxPosAcc": 2.0, "maxNegAcc": 4.5, "usualPosAcc": 2.0, "usualNegAcc": 4.5, "minGap": 2.5, "maxSpeed": 11.111, "headwayTime": 2}, "route": ["road_1_0_1", "road_1_1_1", "road_1_2_0", "road_2_2_0", "road_3_2_3", "road_3_1_2", "road_2_1_3"], "interval": 1.0, "startTime": 221, "endTime": 221},
{"vehicle": {"length": 5.0, "width": 2.0, "maxPosAcc": 2.0, "maxNegAcc": 4.5, "usualPosAcc": 2.0, "usualNegAcc": 4.5, "minGap": 2.5, "maxSpeed": 11.111, "headwayTime": 2}, "route": ["road_0_10_0", "road_1_10_0", "road_2_10_3", "road_2_9_3", "road_2_8_3", "road_2_7_3", "road_2_6_3", "road_2_5_3", "road_2_4_2", "road_1_4_2"], "interval": 1.0, "startTime": 222, "endTime": 222},
{"vehicle": {"length": 5.0, "width": 2.0, "maxPosAcc": 2.0, "maxNegAcc": 4.5, "usualPosAcc": 2.0, "usualNegAcc": 4.5, "minGap": 2.5, "maxSpeed": 11.111, "headwayTime": 2}, "route": ["road_2_0_1", "road_2_1_2", "road_1_1_3"], "interval": 1.0, "startTime": 222, "endTime": 222},
{"vehicle": {"length": 5.0, "width": 2.0, "maxPosAcc": 2.0, "maxNegAcc": 4.5, "usualPosAcc": 2.0, "usualNegAcc": 4.5, "minGap": 2.5, "maxSpeed": 11.111, "headwayTime": 2}, "route": ["road_0_8_0", "road_1_8_0", "road_2_8_3", "road_2_7_3", "road_2_6_3", "road_2_5_3", "road_2_4_3", "road_2_3_3", "road_2_2_3", "road_2_1_2", "road_1_1_3"], "interval": 1.0, "startTime": 223, "endTime": 223},
{"vehicle": {"length": 5.0, "width": 2.0, "maxPosAcc": 2.0, "maxNegAcc": 4.5, "usualPosAcc": 2.0, "usualNegAcc": 4.5, "minGap": 2.5, "maxSpeed": 11.111, "headwayTime": 2}, "route": ["road_1_0_1", "road_1_1_1", "road_1_2_1", "road_1_3_1", "road_1_4_1", "road_1_5_1", "road_1_6_1", "road_1_7_1", "road_1_8_1", "road_1_9_1", "road_1_10_1", "road_1_11_1", "road_1_12_2"], "interval": 1.0, "startTime": 224, "endTime": 224},
{"vehicle": {"length": 5.0, "width": 2.0, "maxPosAcc": 2.0, "maxNegAcc": 4.5, "usualPosAcc": 2.0, "usualNegAcc": 4.5, "minGap": 2.5, "maxSpeed": 11.111, "headwayTime": 2}, "route": ["road_0_9_0", "road_1_9_1", "road_1_10_0", "road_2_10_3", "road_2_9_3", "road_2_8_3", "road_2_7_3", "road_2_6_3", "road_2_5_3", "road_2_4_3", "road_2_3_3", "road_2_2_3", "road_2_1_2", "road_1_1_3"], "interval": 1.0, "startTime": 225, "endTime": 225},
{"vehicle": {"length": 5.0, "width": 2.0, "maxPosAcc": 2.0, "maxNegAcc": 4.5, "usualPosAcc": 2.0, "usualNegAcc": 4.5, "minGap": 2.5, "maxSpeed": 11.111, "headwayTime": 2}, "route": ["road_1_0_1", "road_1_1_1", "road_1_2_1", "road_1_3_1", "road_1_4_1", "road_1_5_1", "road_1_6_1", "road_1_7_1", "road_1_8_1", "road_1_9_1", "road_1_10_1", "road_1_11_1", "road_1_12_1", "road_1_13_1", "road_1_14_2"], "interval": 1.0, "startTime": 226, "endTime": 226},
{"vehicle": {"length": 5.0, "width": 2.0, "maxPosAcc": 2.0, "maxNegAcc": 4.5, "usualPosAcc": 2.0, "usualNegAcc": 4.5, "minGap": 2.5, "maxSpeed": 11.111, "headwayTime": 2}, "route": ["road_5_29_3", "road_5_28_3", "road_5_27_3", "road_5_26_3", "road_5_25_2", "road_4_25_2", "road_3_25_3", "road_3_24_3", "road_3_23_3", "road_3_22_3", "road_3_21_3", "road_3_20_3", "road_3_19_3", "road_3_18_3", "road_3_17_3", "road_3_16_3", "road_3_15_3", "road_3_14_3", "road_3_13_3", "road_3_12_3", "road_3_11_3", "road_3_10_3", "road_3_9_3", "road_3_8_3", "road_3_7_3", "road_3_6_3", "road_3_5_3", "road_3_4_3", "road_3_3_3", "road_3_2_3", "road_3_1_3"], "interval": 1.0, "startTime": 227, "endTime": 227},
{"vehicle": {"length": 5.0, "width": 2.0, "maxPosAcc": 2.0, "maxNegAcc": 4.5, "usualPosAcc": 2.0, "usualNegAcc": 4.5, "minGap": 2.5, "maxSpeed": 11.111, "headwayTime": 2}, "route": ["road_8_11_2", "road_7_11_2", "road_6_11_2", "road_5_11_2", "road_4_11_2", "road_3_11_3", "road_3_10_3", "road_3_9_3", "road_3_8_3", "road_3_7_3", "road_3_6_3", "road_3_5_3", "road_3_4_3", "road_3_3_3", "road_3_2_3", "road_3_1_2", "road_2_1_2", "road_1_1_3"], "interval": 1.0, "startTime": 228, "endTime": 228},
{"vehicle": {"length": 5.0, "width": 2.0, "maxPosAcc": 2.0, "maxNegAcc": 4.5, "usualPosAcc": 2.0, "usualNegAcc": 4.5, "minGap": 2.5, "maxSpeed": 11.111, "headwayTime": 2}, "route": ["road_6_0_1", "road_6_1_2", "road_5_1_2", "road_4_1_2", "road_3_1_2", "road_2_1_2", "road_1_1_3"], "interval": 1.0, "startTime": 229, "endTime": 229},
{"vehicle": {"length": 5.0, "width": 2.0, "maxPosAcc": 2.0, "maxNegAcc": 4.5, "usualPosAcc": 2.0, "usualNegAcc": 4.5, "minGap": 2.5, "maxSpeed": 11.111, "headwayTime": 2}, "route": ["road_0_12_0", "road_1_12_0", "road_2_12_3", "road_2_11_3", "road_2_10_3", "road_2_9_3", "road_2_8_3", "road_2_7_3", "road_2_6_3", "road_2_5_3", "road_2_4_3", "road_2_3_3", "road_2_2_3", "road_2_1_2", "road_1_1_3"], "interval": 1.0, "startTime": 229, "endTime": 229},
{"vehicle": {"length": 5.0, "width": 2.0, "maxPosAcc": 2.0, "maxNegAcc": 4.5, "usualPosAcc": 2.0, "usualNegAcc": 4.5, "minGap": 2.5, "maxSpeed": 11.111, "headwayTime": 2}, "route": ["road_0_8_0", "road_1_8_0", "road_2_8_0", "road_3_8_0", "road_4_8_0", "road_5_8_0", "road_6_8_0", "road_7_8_1", "road_7_9_1", "road_7_10_0"], "interval": 1.0, "startTime": 230, "endTime": 230},
{"vehicle": {"length": 5.0, "width": 2.0, "maxPosAcc": 2.0, "maxNegAcc": 4.5, "usualPosAcc": 2.0, "usualNegAcc": 4.5, "minGap": 2.5, "maxSpeed": 11.111, "headwayTime": 2}, "route": ["road_1_0_1", "road_1_1_1", "road_1_2_0", "road_2_2_0", "road_3_2_0", "road_4_2_0", "road_5_2_0", "road_6_2_0", "road_7_2_1", "road_7_3_1", "road_7_4_1", "road_7_5_1", "road_7_6_1", "road_7_7_1", "road_7_8_1", "road_7_9_1", "road_7_10_1", "road_7_11_1", "road_7_12_1", "road_7_13_1", "road_7_14_1", "road_7_15_1", "road_7_16_1", "road_7_17_0"], "interval": 1.0, "startTime": 230, "endTime": 230},
{"vehicle": {"length": 5.0, "width": 2.0, "maxPosAcc": 2.0, "maxNegAcc": 4.5, "usualPosAcc": 2.0, "usualNegAcc": 4.5, "minGap": 2.5, "maxSpeed": 11.111, "headwayTime": 2}, "route": ["road_0_5_0", "road_1_5_1", "road_1_6_1", "road_1_7_1", "road_1_8_0", "road_2_8_0", "road_3_8_0", "road_4_8_0", "road_5_8_0", "road_6_8_0", "road_7_8_1", "road_7_9_1", "road_7_10_1", "road_7_11_1", "road_7_12_1", "road_7_13_1", "road_7_14_1", "road_7_15_1", "road_7_16_1", "road_7_17_1", "road_7_18_0"], "interval": 1.0, "startTime": 230, "endTime": 230},
{"vehicle": {"length": 5.0, "width": 2.0, "maxPosAcc": 2.0, "maxNegAcc": 4.5, "usualPosAcc": 2.0, "usualNegAcc": 4.5, "minGap": 2.5, "maxSpeed": 11.111, "headwayTime": 2}, "route": ["road_0_23_0", "road_1_23_1", "road_1_24_0", "road_2_24_0", "road_3_24_0", "road_4_24_0", "road_5_24_3", "road_5_23_3", "road_5_22_3", "road_5_21_3", "road_5_20_3", "road_5_19_3", "road_5_18_3", "road_5_17_0", "road_6_17_0", "road_7_17_3", "road_7_16_3", "road_7_15_3", "road_7_14_3", "road_7_13_3", "road_7_12_3", "road_7_11_3", "road_7_10_0"], "interval": 1.0, "startTime": 230, "endTime": 230},
{"vehicle": {"length": 5.0, "width": 2.0, "maxPosAcc": 2.0, "maxNegAcc": 4.5, "usualPosAcc": 2.0, "usualNegAcc": 4.5, "minGap": 2.5, "maxSpeed": 11.111, "headwayTime": 2}, "route": ["road_8_7_2", "road_7_7_2", "road_6_7_2", "road_5_7_3", "road_5_6_3", "road_5_5_2", "road_4_5_2", "road_3_5_3", "road_3_4_3", "road_3_3_3", "road_3_2_3", "road_3_1_2", "road_2_1_2", "road_1_1_3"], "interval": 1.0, "startTime": 231, "endTime": 231},
{"vehicle": {"length": 5.0, "width": 2.0, "maxPosAcc": 2.0, "maxNegAcc": 4.5, "usualPosAcc": 2.0, "usualNegAcc": 4.5, "minGap": 2.5, "maxSpeed": 11.111, "headwayTime": 2}, "route": ["road_8_27_2", "road_7_27_2", "road_6_27_2", "road_5_27_3", "road_5_26_3", "road_5_25_2", "road_4_25_2", "road_3_25_3", "road_3_24_3", "road_3_23_3", "road_3_22_3", "road_3_21_3", "road_3_20_3", "road_3_19_3", "road_3_18_3", "road_3_17_3", "road_3_16_3", "road_3_15_3", "road_3_14_3", "road_3_13_3", "road_3_12_3", "road_3_11_3", "road_3_10_3", "road_3_9_3", "road_3_8_3", "road_3_7_3", "road_3_6_3", "road_3_5_3", "road_3_4_3", "road_3_3_3", "road_3_2_3", "road_3_1_3"], "interval": 1.0, "startTime": 231, "endTime": 231},
{"vehicle": {"length": 5.0, "width": 2.0, "maxPosAcc": 2.0, "maxNegAcc": 4.5, "usualPosAcc": 2.0, "usualNegAcc": 4.5, "minGap": 2.5, "maxSpeed": 11.111, "headwayTime": 2}, "route": ["road_0_24_0", "road_1_24_0", "road_2_24_3", "road_2_23_3", "road_2_22_3", "road_2_21_3", "road_2_20_3", "road_2_19_3", "road_2_18_3", "road_2_17_3", "road_2_16_3", "road_2_15_2", "road_1_15_1", "road_1_16_2"], "interval": 1.0, "startTime": 231, "endTime": 231},
{"vehicle": {"length": 5.0, "width": 2.0, "maxPosAcc": 2.0, "maxNegAcc": 4.5, "usualPosAcc": 2.0, "usualNegAcc": 4.5, "minGap": 2.5, "maxSpeed": 11.111, "headwayTime": 2}, "route": ["road_8_10_2", "road_7_10_2", "road_6_10_2", "road_5_10_3", "road_5_9_2", "road_4_9_2", "road_3_9_3", "road_3_8_3", "road_3_7_3", "road_3_6_3", "road_3_5_3", "road_3_4_3", "road_3_3_3", "road_3_2_3", "road_3_1_2", "road_2_1_2", "road_1_1_3"], "interval": 1.0, "startTime": 232, "endTime": 232},
{"vehicle": {"length": 5.0, "width": 2.0, "maxPosAcc": 2.0, "maxNegAcc": 4.5, "usualPosAcc": 2.0, "usualNegAcc": 4.5, "minGap": 2.5, "maxSpeed": 11.111, "headwayTime": 2}, "route": ["road_8_18_2", "road_7_18_3", "road_7_17_2", "road_6_17_2", "road_5_17_2", "road_4_17_2", "road_3_17_3", "road_3_16_3", "road_3_15_2", "road_2_15_2", "road_1_15_2"], "interval": 1.0, "startTime": 232, "endTime": 232},
{"vehicle": {"length": 5.0, "width": 2.0, "maxPosAcc": 2.0, "maxNegAcc": 4.5, "usualPosAcc": 2.0, "usualNegAcc": 4.5, "minGap": 2.5, "maxSpeed": 11.111, "headwayTime": 2}, "route": ["road_1_0_1", "road_1_1_1", "road_1_2_1", "road_1_3_1", "road_1_4_1", "road_1_5_1", "road_1_6_1", "road_1_7_1", "road_1_8_1", "road_1_9_1", "road_1_10_1", "road_1_11_1", "road_1_12_1", "road_1_13_1", "road_1_14_1", "road_1_15_1", "road_1_16_1", "road_1_17_1", "road_1_18_1", "road_1_19_1", "road_1_20_1", "road_1_21_1", "road_1_22_2"], "interval": 1.0, "startTime": 233, "endTime": 233},
{"vehicle": {"length": 5.0, "width": 2.0, "maxPosAcc": 2.0, "maxNegAcc": 4.5, "usualPosAcc": 2.0, "usualNegAcc": 4.5, "minGap": 2.5, "maxSpeed": 11.111, "headwayTime": 2}, "route": ["road_5_0_1", "road_5_1_2", "road_4_1_2", "road_3_1_2", "road_2_1_2", "road_1_1_3"], "interval": 1.0, "startTime": 234, "endTime": 234},
{"vehicle": {"length": 5.0, "width": 2.0, "maxPosAcc": 2.0, "maxNegAcc": 4.5, "usualPosAcc": 2.0, "usualNegAcc": 4.5, "minGap": 2.5, "maxSpeed": 11.111, "headwayTime": 2}, "route": ["road_2_29_3", "road_2_28_0", "road_3_28_3", "road_3_27_2", "road_2_27_3", "road_2_26_3", "road_2_25_3", "road_2_24_3", "road_2_23_3", "road_2_22_3", "road_2_21_3", "road_2_20_3", "road_2_19_3", "road_2_18_3", "road_2_17_3", "road_2_16_3", "road_2_15_3", "road_2_14_3", "road_2_13_3", "road_2_12_3", "road_2_11_3", "road_2_10_3", "road_2_9_3", "road_2_8_3", "road_2_7_3", "road_2_6_3", "road_2_5_3", "road_2_4_3", "road_2_3_3", "road_2_2_3", "road_2_1_2", "road_1_1_3"], "interval": 1.0, "startTime": 234, "endTime": 234},
{"vehicle": {"length": 5.0, "width": 2.0, "maxPosAcc": 2.0, "maxNegAcc": 4.5, "usualPosAcc": 2.0, "usualNegAcc": 4.5, "minGap": 2.5, "maxSpeed": 11.111, "headwayTime": 2}, "route": ["road_0_15_0", "road_1_15_1", "road_1_16_1", "road_1_17_1", "road_1_18_1", "road_1_19_1", "road_1_20_1", "road_1_21_1", "road_1_22_1", "road_1_23_1", "road_1_24_1", "road_1_25_2"], "interval": 1.0, "startTime": 234, "endTime": 234},
{"vehicle": {"length": 5.0, "width": 2.0, "maxPosAcc": 2.0, "maxNegAcc": 4.5, "usualPosAcc": 2.0, "usualNegAcc": 4.5, "minGap": 2.5, "maxSpeed": 11.111, "headwayTime": 2}, "route": ["road_8_10_2", "road_7_10_1", "road_7_11_1", "road_7_12_1", "road_7_13_1", "road_7_14_1", "road_7_15_1", "road_7_16_1", "road_7_17_1", "road_7_18_1", "road_7_19_1", "road_7_20_1", "road_7_21_1", "road_7_22_1", "road_7_23_1", "road_7_24_1", "road_7_25_1", "road_7_26_1", "road_7_27_2", "road_6_27_1", "road_6_28_1"], "interval": 1.0, "startTime": 235, "endTime": 235},
{"vehicle": {"length": 5.0, "width": 2.0, "maxPosAcc": 2.0, "maxNegAcc": 4.5, "usualPosAcc": 2.0, "usualNegAcc": 4.5, "minGap": 2.5, "maxSpeed": 11.111, "headwayTime": 2}, "route": ["road_8_12_2", "road_7_12_1", "road_7_13_1", "road_7_14_1", "road_7_15_1", "road_7_16_1", "road_7_17_1", "road_7_18_1", "road_7_19_1", "road_7_20_1", "road_7_21_1", "road_7_22_1", "road_7_23_1", "road_7_24_1", "road_7_25_1", "road_7_26_1", "road_7_27_2", "road_6_27_1", "road_6_28_1"], "interval": 1.0, "startTime": 235, "endTime": 235},
{"vehicle": {"length": 5.0, "width": 2.0, "maxPosAcc": 2.0, "maxNegAcc": 4.5, "usualPosAcc": 2.0, "usualNegAcc": 4.5, "minGap": 2.5, "maxSpeed": 11.111, "headwayTime": 2}, "route": ["road_2_0_1", "road_2_1_2", "road_1_1_3"], "interval": 1.0, "startTime": 235, "endTime": 235},
{"vehicle": {"length": 5.0, "width": 2.0, "maxPosAcc": 2.0, "maxNegAcc": 4.5, "usualPosAcc": 2.0, "usualNegAcc": 4.5, "minGap": 2.5, "maxSpeed": 11.111, "headwayTime": 2}, "route": ["road_8_24_2", "road_7_24_3", "road_7_23_3", "road_7_22_3", "road_7_21_3", "road_7_20_3", "road_7_19_3", "road_7_18_3", "road_7_17_3", "road_7_16_3", "road_7_15_3", "road_7_14_3", "road_7_13_3", "road_7_12_3", "road_7_11_0"], "interval": 1.0, "startTime": 236, "endTime": 236},
{"vehicle": {"length": 5.0, "width": 2.0, "maxPosAcc": 2.0, "maxNegAcc": 4.5, "usualPosAcc": 2.0, "usualNegAcc": 4.5, "minGap": 2.5, "maxSpeed": 11.111, "headwayTime": 2}, "route": ["road_3_29_3", "road_3_28_0", "road_4_28_0", "road_5_28_0", "road_6_28_0", "road_7_28_3", "road_7_27_3", "road_7_26_0"], "interval": 1.0, "startTime": 236, "endTime": 236},
{"vehicle": {"length": 5.0, "width": 2.0, "maxPosAcc": 2.0, "maxNegAcc": 4.5, "usualPosAcc": 2.0, "usualNegAcc": 4.5, "minGap": 2.5, "maxSpeed": 11.111, "headwayTime": 2}, "route": ["road_0_10_0", "road_1_10_1", "road_1_11_1", "road_1_12_1", "road_1_13_1", "road_1_14_1", "road_1_15_1", "road_1_16_1", "road_1_17_1", "road_1_18_1", "road_1_19_1", "road_1_20_1", "road_1_21_1", "road_1_22_1", "road_1_23_1", "road_1_24_1", "road_1_25_1", "road_1_26_1", "road_1_27_1", "road_1_28_1"], "interval": 1.0, "startTime": 237, "endTime": 237},
{"vehicle": {"length": 5.0, "width": 2.0, "maxPosAcc": 2.0, "maxNegAcc": 4.5, "usualPosAcc": 2.0, "usualNegAcc": 4.5, "minGap": 2.5, "maxSpeed": 11.111, "headwayTime": 2}, "route": ["road_5_29_3", "road_5_28_3", "road_5_27_2", "road_4_27_1", "road_4_28_1"], "interval": 1.0, "startTime": 237, "endTime": 237},
{"vehicle": {"length": 5.0, "width": 2.0, "maxPosAcc": 2.0, "maxNegAcc": 4.5, "usualPosAcc": 2.0, "usualNegAcc": 4.5, "minGap": 2.5, "maxSpeed": 11.111, "headwayTime": 2}, "route": ["road_0_8_0", "road_1_8_0", "road_2_8_3", "road_2_7_3", "road_2_6_3", "road_2_5_3", "road_2_4_3", "road_2_3_3", "road_2_2_3", "road_2_1_2", "road_1_1_1", "road_1_2_1", "road_1_3_2"], "interval": 1.0, "startTime": 238, "endTime": 238},
{"vehicle": {"length": 5.0, "width": 2.0, "maxPosAcc": 2.0, "maxNegAcc": 4.5, "usualPosAcc": 2.0, "usualNegAcc": 4.5, "minGap": 2.5, "maxSpeed": 11.111, "headwayTime": 2}, "route": ["road_1_29_3", "road_1_28_0", "road_2_28_3", "road_2_27_3", "road_2_26_3", "road_2_25_3", "road_2_24_3", "road_2_23_3", "road_2_22_3", "road_2_21_3", "road_2_20_3", "road_2_19_3", "road_2_18_3", "road_2_17_3", "road_2_16_3", "road_2_15_3", "road_2_14_3", "road_2_13_3", "road_2_12_3", "road_2_11_3", "road_2_10_3", "road_2_9_3", "road_2_8_3", "road_2_7_2", "road_1_7_2"], "interval": 1.0, "startTime": 238, "endTime": 238},
{"vehicle": {"length": 5.0, "width": 2.0, "maxPosAcc": 2.0, "maxNegAcc": 4.5, "usualPosAcc": 2.0, "usualNegAcc": 4.5, "minGap": 2.5, "maxSpeed": 11.111, "headwayTime": 2}, "route": ["road_4_29_3", "road_4_28_0", "road_5_28_3", "road_5_27_3", "road_5_26_3", "road_5_25_2", "road_4_25_2", "road_3_25_2", "road_2_25_3", "road_2_24_3", "road_2_23_3", "road_2_22_3", "road_2_21_3", "road_2_20_3", "road_2_19_3", "road_2_18_3", "road_2_17_3", "road_2_16_3", "road_2_15_3", "road_2_14_3", "road_2_13_3", "road_2_12_3", "road_2_11_3", "road_2_10_3", "road_2_9_3", "road_2_8_3", "road_2_7_3", "road_2_6_3", "road_2_5_3", "road_2_4_3", "road_2_3_3", "road_2_2_3", "road_2_1_2", "road_1_1_3"], "interval": 1.0, "startTime": 238, "endTime": 238},
{"vehicle": {"length": 5.0, "width": 2.0, "maxPosAcc": 2.0, "maxNegAcc": 4.5, "usualPosAcc": 2.0, "usualNegAcc": 4.5, "minGap": 2.5, "maxSpeed": 11.111, "headwayTime": 2}, "route": ["road_0_3_0", "road_1_3_0", "road_2_3_0", "road_3_3_0", "road_4_3_0", "road_5_3_0", "road_6_3_0", "road_7_3_1", "road_7_4_1", "road_7_5_1", "road_7_6_1", "road_7_7_1", "road_7_8_1", "road_7_9_1", "road_7_10_1", "road_7_11_1", "road_7_12_1", "road_7_13_1", "road_7_14_1", "road_7_15_1", "road_7_16_1", "road_7_17_1", "road_7_18_1", "road_7_19_1", "road_7_20_1", "road_7_21_1", "road_7_22_1", "road_7_23_1", "road_7_24_1", "road_7_25_1", "road_7_26_1", "road_7_27_0"], "interval": 1.0, "startTime": 239, "endTime": 239},
{"vehicle": {"length": 5.0, "width": 2.0, "maxPosAcc": 2.0, "maxNegAcc": 4.5, "usualPosAcc": 2.0, "usualNegAcc": 4.5, "minGap": 2.5, "maxSpeed": 11.111, "headwayTime": 2}, "route": ["road_7_0_1", "road_7_1_2", "road_6_1_2", "road_5_1_2", "road_4_1_3"], "interval": 1.0, "startTime": 240, "endTime": 240},
{"vehicle": {"length": 5.0, "width": 2.0, "maxPosAcc": 2.0, "maxNegAcc": 4.5, "usualPosAcc": 2.0, "usualNegAcc": 4.5, "minGap": 2.5, "maxSpeed": 11.111, "headwayTime": 2}, "route": ["road_8_2_2", "road_7_2_1", "road_7_3_0"], "interval": 1.0, "startTime": 240, "endTime": 240},
{"vehicle": {"length": 5.0, "width": 2.0, "maxPosAcc": 2.0, "maxNegAcc": 4.5, "usualPosAcc": 2.0, "usualNegAcc": 4.5, "minGap": 2.5, "maxSpeed": 11.111, "headwayTime": 2}, "route": ["road_8_5_2", "road_7_5_2", "road_6_5_2", "road_5_5_2", "road_4_5_2", "road_3_5_2", "road_2_5_2", "road_1_5_1", "road_1_6_1", "road_1_7_1", "road_1_8_1", "road_1_9_1", "road_1_10_1", "road_1_11_1", "road_1_12_1", "road_1_13_1", "road_1_14_1", "road_1_15_1", "road_1_16_1", "road_1_17_1", "road_1_18_1", "road_1_19_1", "road_1_20_1", "road_1_21_1", "road_1_22_2"], "interval": 1.0, "startTime": 240, "endTime": 240},
{"vehicle": {"length": 5.0, "width": 2.0, "maxPosAcc": 2.0, "maxNegAcc": 4.5, "usualPosAcc": 2.0, "usualNegAcc": 4.5, "minGap": 2.5, "maxSpeed": 11.111, "headwayTime": 2}, "route": ["road_8_6_2", "road_7_6_1", "road_7_7_2", "road_6_7_1", "road_6_8_1", "road_6_9_2", "road_5_9_2", "road_4_9_2", "road_3_9_2", "road_2_9_2", "road_1_9_1", "road_1_10_1", "road_1_11_1", "road_1_12_1", "road_1_13_1", "road_1_14_1", "road_1_15_1", "road_1_16_1", "road_1_17_1", "road_1_18_1", "road_1_19_2"], "interval": 1.0, "startTime": 240, "endTime": 240},
{"vehicle": {"length": 5.0, "width": 2.0, "maxPosAcc": 2.0, "maxNegAcc": 4.5, "usualPosAcc": 2.0, "usualNegAcc": 4.5, "minGap": 2.5, "maxSpeed": 11.111, "headwayTime": 2}, "route": ["road_8_9_2", "road_7_9_2", "road_6_9_2", "road_5_9_2", "road_4_9_2", "road_3_9_2", "road_2_9_2", "road_1_9_1", "road_1_10_1", "road_1_11_1", "road_1_12_1", "road_1_13_1", "road_1_14_1", "road_1_15_1", "road_1_16_1", "road_1_17_1", "road_1_18_1", "road_1_19_1", "road_1_20_1", "road_1_21_1", "road_1_22_1", "road_1_23_1", "road_1_24_1", "road_1_25_1", "road_1_26_1", "road_1_27_1", "road_1_28_1"], "interval": 1.0, "startTime": 240, "endTime": 240},
{"vehicle": {"length": 5.0, "width": 2.0, "maxPosAcc": 2.0, "maxNegAcc": 4.5, "usualPosAcc": 2.0, "usualNegAcc": 4.5, "minGap": 2.5, "maxSpeed": 11.111, "headwayTime": 2}, "route": ["road_8_11_2", "road_7_11_1", "road_7_12_1", "road_7_13_2", "road_6_13_2", "road_5_13_2", "road_4_13_2", "road_3_13_2", "road_2_13_2", "road_1_13_1", "road_1_14_1", "road_1_15_1", "road_1_16_1", "road_1_17_1", "road_1_18_1", "road_1_19_2"], "interval": 1.0, "startTime": 240, "endTime": 240},
{"vehicle": {"length": 5.0, "width": 2.0, "maxPosAcc": 2.0, "maxNegAcc": 4.5, "usualPosAcc": 2.0, "usualNegAcc": 4.5, "minGap": 2.5, "maxSpeed": 11.111, "headwayTime": 2}, "route": ["road_8_12_2", "road_7_12_3", "road_7_11_2", "road_6_11_2", "road_5_11_2", "road_4_11_2", "road_3_11_3", "road_3_10_3", "road_3_9_3", "road_3_8_3", "road_3_7_3", "road_3_6_3", "road_3_5_3", "road_3_4_3", "road_3_3_3", "road_3_2_3", "road_3_1_3"], "interval": 1.0, "startTime": 240, "endTime": 240},
{"vehicle": {"length": 5.0, "width": 2.0, "maxPosAcc": 2.0, "maxNegAcc": 4.5, "usualPosAcc": 2.0, "usualNegAcc": 4.5, "minGap": 2.5, "maxSpeed": 11.111, "headwayTime": 2}, "route": ["road_8_13_2", "road_7_13_2", "road_6_13_2", "road_5_13_3", "road_5_12_3", "road_5_11_2", "road_4_11_2", "road_3_11_2", "road_2_11_2", "road_1_11_2"], "interval": 1.0, "startTime": 240, "endTime": 240},
{"vehicle": {"length": 5.0, "width": 2.0, "maxPosAcc": 2.0, "maxNegAcc": 4.5, "usualPosAcc": 2.0, "usualNegAcc": 4.5, "minGap": 2.5, "maxSpeed": 11.111, "headwayTime": 2}, "route": ["road_8_16_2", "road_7_16_3", "road_7_15_3", "road_7_14_3", "road_7_13_3", "road_7_12_3", "road_7_11_0"], "interval": 1.0, "startTime": 240, "endTime": 240},
{"vehicle": {"length": 5.0, "width": 2.0, "maxPosAcc": 2.0, "maxNegAcc": 4.5, "usualPosAcc": 2.0, "usualNegAcc": 4.5, "minGap": 2.5, "maxSpeed": 11.111, "headwayTime": 2}, "route": ["road_8_17_2", "road_7_17_2", "road_6_17_2", "road_5_17_2", "road_4_17_2", "road_3_17_2", "road_2_17_2", "road_1_17_2"], "interval": 1.0, "startTime": 240, "endTime": 240},
{"vehicle": {"length": 5.0, "width": 2.0, "maxPosAcc": 2.0, "maxNegAcc": 4.5, "usualPosAcc": 2.0, "usualNegAcc": 4.5, "minGap": 2.5, "maxSpeed": 11.111, "headwayTime": 2}, "route": ["road_8_19_2", "road_7_19_3", "road_7_18_3", "road_7_17_3", "road_7_16_3", "road_7_15_3", "road_7_14_3", "road_7_13_3", "road_7_12_3", "road_7_11_3", "road_7_10_3", "road_7_9_3", "road_7_8_3", "road_7_7_3", "road_7_6_3", "road_7_5_3", "road_7_4_3", "road_7_3_3", "road_7_2_3", "road_7_1_2", "road_6_1_3"], "interval": 1.0, "startTime": 240, "endTime": 240},
{"vehicle": {"length": 5.0, "width": 2.0, "maxPosAcc": 2.0, "maxNegAcc": 4.5, "usualPosAcc": 2.0, "usualNegAcc": 4.5, "minGap": 2.5, "maxSpeed": 11.111, "headwayTime": 2}, "route": ["road_8_21_2", "road_7_21_2", "road_6_21_2", "road_5_21_2", "road_4_21_2", "road_3_21_2", "road_2_21_2", "road_1_21_1", "road_1_22_1", "road_1_23_1", "road_1_24_1", "road_1_25_2"], "interval": 1.0, "startTime": 240, "endTime": 240},
{"vehicle": {"length": 5.0, "width": 2.0, "maxPosAcc": 2.0, "maxNegAcc": 4.5, "usualPosAcc": 2.0, "usualNegAcc": 4.5, "minGap": 2.5, "maxSpeed": 11.111, "headwayTime": 2}, "route": ["road_8_22_2", "road_7_22_3", "road_7_21_2", "road_6_21_2", "road_5_21_2", "road_4_21_2", "road_3_21_2", "road_2_21_3", "road_2_20_3", "road_2_19_3", "road_2_18_3", "road_2_17_3", "road_2_16_3", "road_2_15_3", "road_2_14_3", "road_2_13_3", "road_2_12_3", "road_2_11_3", "road_2_10_3", "road_2_9_2", "road_1_9_2"], "interval": 1.0, "startTime": 240, "endTime": 240},
{"vehicle": {"length": 5.0, "width": 2.0, "maxPosAcc": 2.0, "maxNegAcc": 4.5, "usualPosAcc": 2.0, "usualNegAcc": 4.5, "minGap": 2.5, "maxSpeed": 11.111, "headwayTime": 2}, "route": ["road_8_23_2", "road_7_23_3", "road_7_22_3", "road_7_21_3", "road_7_20_3", "road_7_19_3", "road_7_18_0"], "interval": 1.0, "startTime": 240, "endTime": 240},
{"vehicle": {"length": 5.0, "width": 2.0, "maxPosAcc": 2.0, "maxNegAcc": 4.5, "usualPosAcc": 2.0, "usualNegAcc": 4.5, "minGap": 2.5, "maxSpeed": 11.111, "headwayTime": 2}, "route": ["road_0_8_0", "road_1_8_0", "road_2_8_3", "road_2_7_3", "road_2_6_3", "road_2_5_3", "road_2_4_3", "road_2_3_3", "road_2_2_0", "road_3_2_3", "road_3_1_3"], "interval": 1.0, "startTime": 240, "endTime": 240},
{"vehicle": {"length": 5.0, "width": 2.0, "maxPosAcc": 2.0, "maxNegAcc": 4.5, "usualPosAcc": 2.0, "usualNegAcc": 4.5, "minGap": 2.5, "maxSpeed": 11.111, "headwayTime": 2}, "route": ["road_1_0_1", "road_1_1_1", "road_1_2_0", "road_2_2_0", "road_3_2_0", "road_4_2_0", "road_5_2_0", "road_6_2_0", "road_7_2_1", "road_7_3_1", "road_7_4_1", "road_7_5_1", "road_7_6_1", "road_7_7_1", "road_7_8_1", "road_7_9_1", "road_7_10_1", "road_7_11_1", "road_7_12_1", "road_7_13_0"], "interval": 1.0, "startTime": 240, "endTime": 240},
{"vehicle": {"length": 5.0, "width": 2.0, "maxPosAcc": 2.0, "maxNegAcc": 4.5, "usualPosAcc": 2.0, "usualNegAcc": 4.5, "minGap": 2.5, "maxSpeed": 11.111, "headwayTime": 2}, "route": ["road_3_0_1", "road_3_1_2", "road_2_1_1", "road_2_2_0", "road_3_2_0", "road_4_2_0", "road_5_2_3", "road_5_1_3"], "interval": 1.0, "startTime": 240, "endTime": 240},
{"vehicle": {"length": 5.0, "width": 2.0, "maxPosAcc": 2.0, "maxNegAcc": 4.5, "usualPosAcc": 2.0, "usualNegAcc": 4.5, "minGap": 2.5, "maxSpeed": 11.111, "headwayTime": 2}, "route": ["road_5_0_1", "road_5_1_2", "road_4_1_2", "road_3_1_2", "road_2_1_3"], "interval": 1.0, "startTime": 240, "endTime": 240},
{"vehicle": {"length": 5.0, "width": 2.0, "maxPosAcc": 2.0, "maxNegAcc": 4.5, "usualPosAcc": 2.0, "usualNegAcc": 4.5, "minGap": 2.5, "maxSpeed": 11.111, "headwayTime": 2}, "route": ["road_0_13_0", "road_1_13_1", "road_1_14_0", "road_2_14_3", "road_2_13_3", "road_2_12_3", "road_2_11_3", "road_2_10_3", "road_2_9_3", "road_2_8_3", "road_2_7_3", "road_2_6_3", "road_2_5_3", "road_2_4_3", "road_2_3_3", "road_2_2_0", "road_3_2_3", "road_3_1_3"], "interval": 1.0, "startTime": 240, "endTime": 240},
{"vehicle": {"length": 5.0, "width": 2.0, "maxPosAcc": 2.0, "maxNegAcc": 4.5, "usualPosAcc": 2.0, "usualNegAcc": 4.5, "minGap": 2.5, "maxSpeed": 11.111, "headwayTime": 2}, "route": ["road_0_22_0", "road_1_22_1", "road_1_23_1", "road_1_24_1", "road_1_25_1", "road_1_26_1", "road_1_27_1", "road_1_28_0", "road_2_28_1"], "interval": 1.0, "startTime": 240, "endTime": 240},
{"vehicle": {"length": 5.0, "width": 2.0, "maxPosAcc": 2.0, "maxNegAcc": 4.5, "usualPosAcc": 2.0, "usualNegAcc": 4.5, "minGap": 2.5, "maxSpeed": 11.111, "headwayTime": 2}, "route": ["road_0_10_0", "road_1_10_0", "road_2_10_3", "road_2_9_3", "road_2_8_3", "road_2_7_3", "road_2_6_3", "road_2_5_3", "road_2_4_3", "road_2_3_3", "road_2_2_3", "road_2_1_2", "road_1_1_3"], "interval": 1.0, "startTime": 240, "endTime": 240},
{"vehicle": {"length": 5.0, "width": 2.0, "maxPosAcc": 2.0, "maxNegAcc": 4.5, "usualPosAcc": 2.0, "usualNegAcc": 4.5, "minGap": 2.5, "maxSpeed": 11.111, "headwayTime": 2}, "route": ["road_0_27_0", "road_1_27_1", "road_1_28_0", "road_2_28_3", "road_2_27_3", "road_2_26_3", "road_2_25_3", "road_2_24_3", "road_2_23_3", "road_2_22_3", "road_2_21_2", "road_1_21_2"], "interval": 1.0, "startTime": 240, "endTime": 240},
{"vehicle": {"length": 5.0, "width": 2.0, "maxPosAcc": 2.0, "maxNegAcc": 4.5, "usualPosAcc": 2.0, "usualNegAcc": 4.5, "minGap": 2.5, "maxSpeed": 11.111, "headwayTime": 2}, "route": ["road_0_16_0", "road_1_16_0", "road_2_16_3", "road_2_15_3", "road_2_14_3", "road_2_13_3", "road_2_12_3", "road_2_11_3", "road_2_10_3", "road_2_9_3", "road_2_8_3", "road_2_7_3", "road_2_6_3", "road_2_5_3", "road_2_4_3", "road_2_3_3", "road_2_2_0", "road_3_2_3", "road_3_1_2", "road_2_1_3"], "interval": 1.0, "startTime": 240, "endTime": 240},
{"vehicle": {"length": 5.0, "width": 2.0, "maxPosAcc": 2.0, "maxNegAcc": 4.5, "usualPosAcc": 2.0, "usualNegAcc": 4.5, "minGap": 2.5, "maxSpeed": 11.111, "headwayTime": 2}, "route": ["road_0_18_0", "road_1_18_0", "road_2_18_3", "road_2_17_3", "road_2_16_3", "road_2_15_3", "road_2_14_3", "road_2_13_3", "road_2_12_3", "road_2_11_3", "road_2_10_3", "road_2_9_3", "road_2_8_3", "road_2_7_3", "road_2_6_3", "road_2_5_2", "road_1_5_2"], "interval": 1.0, "startTime": 240, "endTime": 240},
{"vehicle": {"length": 5.0, "width": 2.0, "maxPosAcc": 2.0, "maxNegAcc": 4.5, "usualPosAcc": 2.0, "usualNegAcc": 4.5, "minGap": 2.5, "maxSpeed": 11.111, "headwayTime": 2}, "route": ["road_0_11_0", "road_1_11_1", "road_1_12_0", "road_2_12_3", "road_2_11_3", "road_2_10_3", "road_2_9_3", "road_2_8_3", "road_2_7_3", "road_2_6_3", "road_2_5_3", "road_2_4_3", "road_2_3_3", "road_2_2_3", "road_2_1_2", "road_1_1_3"], "interval": 1.0, "startTime": 240, "endTime": 240},
{"vehicle": {"length": 5.0, "width": 2.0, "maxPosAcc": 2.0, "maxNegAcc": 4.5, "usualPosAcc": 2.0, "usualNegAcc": 4.5, "minGap": 2.5, "maxSpeed": 11.111, "headwayTime": 2}, "route": ["road_0_20_0", "road_1_20_0", "road_2_20_3", "road_2_19_3", "road_2_18_3", "road_2_17_3", "road_2_16_3", "road_2_15_3", "road_2_14_3", "road_2_13_3", "road_2_12_3", "road_2_11_3", "road_2_10_3", "road_2_9_3", "road_2_8_3", "road_2_7_2", "road_1_7_2"], "interval": 1.0, "startTime": 240, "endTime": 240},
{"vehicle": {"length": 5.0, "width": 2.0, "maxPosAcc": 2.0, "maxNegAcc": 4.5, "usualPosAcc": 2.0, "usualNegAcc": 4.5, "minGap": 2.5, "maxSpeed": 11.111, "headwayTime": 2}, "route": ["road_5_29_3", "road_5_28_3", "road_5_27_3", "road_5_26_3", "road_5_25_2", "road_4_25_2", "road_3_25_2", "road_2_25_3", "road_2_24_3", "road_2_23_3", "road_2_22_3", "road_2_21_3", "road_2_20_3", "road_2_19_3", "road_2_18_3", "road_2_17_3", "road_2_16_3", "road_2_15_3", "road_2_14_3", "road_2_13_3", "road_2_12_3", "road_2_11_3", "road_2_10_3", "road_2_9_3", "road_2_8_3", "road_2_7_3", "road_2_6_3", "road_2_5_3", "road_2_4_3", "road_2_3_3", "road_2_2_3", "road_2_1_2", "road_1_1_3"], "interval": 1.0, "startTime": 240, "endTime": 240},
{"vehicle": {"length": 5.0, "width": 2.0, "maxPosAcc": 2.0, "maxNegAcc": 4.5, "usualPosAcc": 2.0, "usualNegAcc": 4.5, "minGap": 2.5, "maxSpeed": 11.111, "headwayTime": 2}, "route": ["road_1_29_3", "road_1_28_0", "road_2_28_0", "road_3_28_0", "road_4_28_0", "road_5_28_3", "road_5_27_3", "road_5_26_3", "road_5_25_3", "road_5_24_3", "road_5_23_3", "road_5_22_3", "road_5_21_3", "road_5_20_3", "road_5_19_3", "road_5_18_3", "road_5_17_0", "road_6_17_0", "road_7_17_3", "road_7_16_3", "road_7_15_3", "road_7_14_3", "road_7_13_3", "road_7_12_3", "road_7_11_0"], "interval": 1.0, "startTime": 240, "endTime": 240},
{"vehicle": {"length": 5.0, "width": 2.0, "maxPosAcc": 2.0, "maxNegAcc": 4.5, "usualPosAcc": 2.0, "usualNegAcc": 4.5, "minGap": 2.5, "maxSpeed": 11.111, "headwayTime": 2}, "route": ["road_3_29_3", "road_3_28_0", "road_4_28_0", "road_5_28_1"], "interval": 1.0, "startTime": 240, "endTime": 240},
{"vehicle": {"length": 5.0, "width": 2.0, "maxPosAcc": 2.0, "maxNegAcc": 4.5, "usualPosAcc": 2.0, "usualNegAcc": 4.5, "minGap": 2.5, "maxSpeed": 11.111, "headwayTime": 2}, "route": ["road_6_29_3", "road_6_28_0", "road_7_28_3", "road_7_27_3", "road_7_26_3", "road_7_25_3", "road_7_24_3", "road_7_23_3", "road_7_22_3", "road_7_21_3", "road_7_20_3", "road_7_19_3", "road_7_18_3", "road_7_17_3", "road_7_16_3", "road_7_15_3", "road_7_14_3", "road_7_13_3", "road_7_12_3", "road_7_11_3", "road_7_10_3", "road_7_9_3", "road_7_8_3", "road_7_7_0"], "interval": 1.0, "startTime": 240, "endTime": 240},
{"vehicle": {"length": 5.0, "width": 2.0, "maxPosAcc": 2.0, "maxNegAcc": 4.5, "usualPosAcc": 2.0, "usualNegAcc": 4.5, "minGap": 2.5, "maxSpeed": 11.111, "headwayTime": 2}, "route": ["road_0_9_0", "road_1_9_1", "road_1_10_0", "road_2_10_0", "road_3_10_0", "road_4_10_0", "road_5_10_0", "road_6_10_0", "road_7_10_1", "road_7_11_1", "road_7_12_1", "road_7_13_1", "road_7_14_1", "road_7_15_1", "road_7_16_1", "road_7_17_1", "road_7_18_1", "road_7_19_0"], "interval": 1.0, "startTime": 240, "endTime": 240},
{"vehicle": {"length": 5.0, "width": 2.0, "maxPosAcc": 2.0, "maxNegAcc": 4.5, "usualPosAcc": 2.0, "usualNegAcc": 4.5, "minGap": 2.5, "maxSpeed": 11.111, "headwayTime": 2}, "route": ["road_0_26_0", "road_1_26_0", "road_2_26_0", "road_3_26_0", "road_4_26_0", "road_5_26_3", "road_5_25_3", "road_5_24_3", "road_5_23_3", "road_5_22_3", "road_5_21_3", "road_5_20_3", "road_5_19_3", "road_5_18_3", "road_5_17_0", "road_6_17_0", "road_7_17_3", "road_7_16_3", "road_7_15_3", "road_7_14_3", "road_7_13_3", "road_7_12_3", "road_7_11_3", "road_7_10_3", "road_7_9_3", "road_7_8_3", "road_7_7_3", "road_7_6_3", "road_7_5_3", "road_7_4_3", "road_7_3_3", "road_7_2_3", "road_7_1_2", "road_6_1_3"], "interval": 1.0, "startTime": 240, "endTime": 240},
{"vehicle": {"length": 5.0, "width": 2.0, "maxPosAcc": 2.0, "maxNegAcc": 4.5, "usualPosAcc": 2.0, "usualNegAcc": 4.5, "minGap": 2.5, "maxSpeed": 11.111, "headwayTime": 2}, "route": ["road_0_7_0", "road_1_7_1", "road_1_8_0", "road_2_8_3", "road_2_7_3", "road_2_6_3", "road_2_5_3", "road_2_4_3", "road_2_3_3", "road_2_2_3", "road_2_1_2", "road_1_1_3"], "interval": 1.0, "startTime": 240, "endTime": 240},
{"vehicle": {"length": 5.0, "width": 2.0, "maxPosAcc": 2.0, "maxNegAcc": 4.5, "usualPosAcc": 2.0, "usualNegAcc": 4.5, "minGap": 2.5, "maxSpeed": 11.111, "headwayTime": 2}, "route": ["road_0_14_0", "road_1_14_0", "road_2_14_3", "road_2_13_3", "road_2_12_3", "road_2_11_2", "road_1_11_1", "road_1_12_2"], "interval": 1.0, "startTime": 240, "endTime": 240},
{"vehicle": {"length": 5.0, "width": 2.0, "maxPosAcc": 2.0, "maxNegAcc": 4.5, "usualPosAcc": 2.0, "usualNegAcc": 4.5, "minGap": 2.5, "maxSpeed": 11.111, "headwayTime": 2}, "route": ["road_0_15_0", "road_1_15_1", "road_1_16_0", "road_2_16_3", "road_2_15_3", "road_2_14_3", "road_2_13_3", "road_2_12_3", "road_2_11_3", "road_2_10_3", "road_2_9_3", "road_2_8_3", "road_2_7_3", "road_2_6_3", "road_2_5_3", "road_2_4_2", "road_1_4_2"], "interval": 1.0, "startTime": 240, "endTime": 240},
{"vehicle": {"length": 5.0, "width": 2.0, "maxPosAcc": 2.0, "maxNegAcc": 4.5, "usualPosAcc": 2.0, "usualNegAcc": 4.5, "minGap": 2.5, "maxSpeed": 11.111, "headwayTime": 2}, "route": ["road_0_21_0", "road_1_21_1", "road_1_22_0", "road_2_22_0", "road_3_22_0", "road_4_22_0", "road_5_22_3", "road_5_21_3", "road_5_20_3", "road_5_19_3", "road_5_18_3", "road_5_17_0", "road_6_17_0", "road_7_17_3", "road_7_16_3", "road_7_15_3", "road_7_14_3", "road_7_13_3", "road_7_12_3", "road_7_11_3", "road_7_10_0"], "interval": 1.0, "startTime": 240, "endTime": 240},
{"vehicle": {"length": 5.0, "width": 2.0, "maxPosAcc": 2.0, "maxNegAcc": 4.5, "usualPosAcc": 2.0, "usualNegAcc": 4.5, "minGap": 2.5, "maxSpeed": 11.111, "headwayTime": 2}, "route": ["road_0_23_0", "road_1_23_1", "road_1_24_0", "road_2_24_3", "road_2_23_3", "road_2_22_3", "road_2_21_3", "road_2_20_3", "road_2_19_3", "road_2_18_3", "road_2_17_3", "road_2_16_3", "road_2_15_3", "road_2_14_3", "road_2_13_3", "road_2_12_3", "road_2_11_3", "road_2_10_3", "road_2_9_3", "road_2_8_3", "road_2_7_3", "road_2_6_3", "road_2_5_3", "road_2_4_3", "road_2_3_3", "road_2_2_3", "road_2_1_2", "road_1_1_3"], "interval": 1.0, "startTime": 240, "endTime": 240},
{"vehicle": {"length": 5.0, "width": 2.0, "maxPosAcc": 2.0, "maxNegAcc": 4.5, "usualPosAcc": 2.0, "usualNegAcc": 4.5, "minGap": 2.5, "maxSpeed": 11.111, "headwayTime": 2}, "route": ["road_2_0_1", "road_2_1_2", "road_1_1_3"], "interval": 1.0, "startTime": 240, "endTime": 240},
{"vehicle": {"length": 5.0, "width": 2.0, "maxPosAcc": 2.0, "maxNegAcc": 4.5, "usualPosAcc": 2.0, "usualNegAcc": 4.5, "minGap": 2.5, "maxSpeed": 11.111, "headwayTime": 2}, "route": ["road_1_0_1", "road_1_1_1", "road_1_2_0", "road_2_2_0", "road_3_2_0", "road_4_2_0", "road_5_2_0", "road_6_2_0", "road_7_2_1", "road_7_3_1", "road_7_4_1", "road_7_5_1", "road_7_6_1", "road_7_7_1", "road_7_8_1", "road_7_9_0"], "interval": 1.0, "startTime": 241, "endTime": 241},
{"vehicle": {"length": 5.0, "width": 2.0, "maxPosAcc": 2.0, "maxNegAcc": 4.5, "usualPosAcc": 2.0, "usualNegAcc": 4.5, "minGap": 2.5, "maxSpeed": 11.111, "headwayTime": 2}, "route": ["road_0_27_0", "road_1_27_1", "road_1_28_0", "road_2_28_3", "road_2_27_3", "road_2_26_3", "road_2_25_3", "road_2_24_3", "road_2_23_3", "road_2_22_3", "road_2_21_3", "road_2_20_3", "road_2_19_3", "road_2_18_3", "road_2_17_3", "road_2_16_3", "road_2_15_3", "road_2_14_3", "road_2_13_3", "road_2_12_3", "road_2_11_3", "road_2_10_3", "road_2_9_3", "road_2_8_3", "road_2_7_3", "road_2_6_3", "road_2_5_3", "road_2_4_3", "road_2_3_3", "road_2_2_3", "road_2_1_2", "road_1_1_3"], "interval": 1.0, "startTime": 241, "endTime": 241},
{"vehicle": {"length": 5.0, "width": 2.0, "maxPosAcc": 2.0, "maxNegAcc": 4.5, "usualPosAcc": 2.0, "usualNegAcc": 4.5, "minGap": 2.5, "maxSpeed": 11.111, "headwayTime": 2}, "route": ["road_0_9_0", "road_1_9_1", "road_1_10_0", "road_2_10_0", "road_3_10_0", "road_4_10_0", "road_5_10_3", "road_5_9_3", "road_5_8_0", "road_6_8_0", "road_7_8_3", "road_7_7_3", "road_7_6_0"], "interval": 1.0, "startTime": 241, "endTime": 241},
{"vehicle": {"length": 5.0, "width": 2.0, "maxPosAcc": 2.0, "maxNegAcc": 4.5, "usualPosAcc": 2.0, "usualNegAcc": 4.5, "minGap": 2.5, "maxSpeed": 11.111, "headwayTime": 2}, "route": ["road_0_17_0", "road_1_17_0", "road_2_17_3", "road_2_16_3", "road_2_15_3", "road_2_14_3", "road_2_13_3", "road_2_12_3", "road_2_11_3", "road_2_10_3", "road_2_9_3", "road_2_8_3", "road_2_7_3", "road_2_6_3", "road_2_5_3", "road_2_4_3", "road_2_3_3", "road_2_2_3", "road_2_1_2", "road_1_1_3"], "interval": 1.0, "startTime": 241, "endTime": 241},
{"vehicle": {"length": 5.0, "width": 2.0, "maxPosAcc": 2.0, "maxNegAcc": 4.5, "usualPosAcc": 2.0, "usualNegAcc": 4.5, "minGap": 2.5, "maxSpeed": 11.111, "headwayTime": 2}, "route": ["road_8_2_2", "road_7_2_1", "road_7_3_1", "road_7_4_1", "road_7_5_2", "road_6_5_2", "road_5_5_2", "road_4_5_2", "road_3_5_2", "road_2_5_2", "road_1_5_1", "road_1_6_1", "road_1_7_1", "road_1_8_1", "road_1_9_1", "road_1_10_1", "road_1_11_1", "road_1_12_1", "road_1_13_1", "road_1_14_1", "road_1_15_1", "road_1_16_1", "road_1_17_2"], "interval": 1.0, "startTime": 242, "endTime": 242},
{"vehicle": {"length": 5.0, "width": 2.0, "maxPosAcc": 2.0, "maxNegAcc": 4.5, "usualPosAcc": 2.0, "usualNegAcc": 4.5, "minGap": 2.5, "maxSpeed": 11.111, "headwayTime": 2}, "route": ["road_8_6_2", "road_7_6_3", "road_7_5_2", "road_6_5_2", "road_5_5_2", "road_4_5_2", "road_3_5_3", "road_3_4_3", "road_3_3_3", "road_3_2_3", "road_3_1_2", "road_2_1_2", "road_1_1_3"], "interval": 1.0, "startTime": 242, "endTime": 242},
{"vehicle": {"length": 5.0, "width": 2.0, "maxPosAcc": 2.0, "maxNegAcc": 4.5, "usualPosAcc": 2.0, "usualNegAcc": 4.5, "minGap": 2.5, "maxSpeed": 11.111, "headwayTime": 2}, "route": ["road_8_7_2", "road_7_7_2", "road_6_7_2", "road_5_7_3", "road_5_6_3", "road_5_5_2", "road_4_5_2", "road_3_5_3", "road_3_4_3", "road_3_3_3", "road_3_2_3", "road_3_1_2", "road_2_1_3"], "interval": 1.0, "startTime": 242, "endTime": 242},
{"vehicle": {"length": 5.0, "width": 2.0, "maxPosAcc": 2.0, "maxNegAcc": 4.5, "usualPosAcc": 2.0, "usualNegAcc": 4.5, "minGap": 2.5, "maxSpeed": 11.111, "headwayTime": 2}, "route": ["road_8_8_2", "road_7_8_1", "road_7_9_1", "road_7_10_1", "road_7_11_1", "road_7_12_1", "road_7_13_1", "road_7_14_1", "road_7_15_1", "road_7_16_0"], "interval": 1.0, "startTime": 242, "endTime": 242},
{"vehicle": {"length": 5.0, "width": 2.0, "maxPosAcc": 2.0, "maxNegAcc": 4.5, "usualPosAcc": 2.0, "usualNegAcc": 4.5, "minGap": 2.5, "maxSpeed": 11.111, "headwayTime": 2}, "route": ["road_8_9_2", "road_7_9_3", "road_7_8_3", "road_7_7_3", "road_7_6_3", "road_7_5_3", "road_7_4_3", "road_7_3_3", "road_7_2_3", "road_7_1_3"], "interval": 1.0, "startTime": 242, "endTime": 242},
{"vehicle": {"length": 5.0, "width": 2.0, "maxPosAcc": 2.0, "maxNegAcc": 4.5, "usualPosAcc": 2.0, "usualNegAcc": 4.5, "minGap": 2.5, "maxSpeed": 11.111, "headwayTime": 2}, "route": ["road_8_10_2", "road_7_10_2", "road_6_10_2", "road_5_10_3", "road_5_9_2", "road_4_9_2", "road_3_9_3", "road_3_8_3", "road_3_7_3", "road_3_6_3", "road_3_5_3", "road_3_4_3", "road_3_3_3", "road_3_2_3", "road_3_1_2", "road_2_1_2", "road_1_1_3"], "interval": 1.0, "startTime": 242, "endTime": 242},
{"vehicle": {"length": 5.0, "width": 2.0, "maxPosAcc": 2.0, "maxNegAcc": 4.5, "usualPosAcc": 2.0, "usualNegAcc": 4.5, "minGap": 2.5, "maxSpeed": 11.111, "headwayTime": 2}, "route": ["road_8_11_2", "road_7_11_2", "road_6_11_2", "road_5_11_2", "road_4_11_2", "road_3_11_3", "road_3_10_3", "road_3_9_3", "road_3_8_3", "road_3_7_3", "road_3_6_3", "road_3_5_3", "road_3_4_3", "road_3_3_3", "road_3_2_3", "road_3_1_2", "road_2_1_3"], "interval": 1.0, "startTime": 242, "endTime": 242},
{"vehicle": {"length": 5.0, "width": 2.0, "maxPosAcc": 2.0, "maxNegAcc": 4.5, "usualPosAcc": 2.0, "usualNegAcc": 4.5, "minGap": 2.5, "maxSpeed": 11.111, "headwayTime": 2}, "route": ["road_8_12_2", "road_7_12_3", "road_7_11_2", "road_6_11_2", "road_5_11_3", "road_5_10_3", "road_5_9_3", "road_5_8_3", "road_5_7_3", "road_5_6_3", "road_5_5_3", "road_5_4_3", "road_5_3_3", "road_5_2_3", "road_5_1_3"], "interval": 1.0, "startTime": 242, "endTime": 242},
{"vehicle": {"length": 5.0, "width": 2.0, "maxPosAcc": 2.0, "maxNegAcc": 4.5, "usualPosAcc": 2.0, "usualNegAcc": 4.5, "minGap": 2.5, "maxSpeed": 11.111, "headwayTime": 2}, "route": ["road_8_13_2", "road_7_13_3", "road_7_12_3", "road_7_11_3", "road_7_10_3", "road_7_9_3", "road_7_8_0"], "interval": 1.0, "startTime": 242, "endTime": 242},
{"vehicle": {"length": 5.0, "width": 2.0, "maxPosAcc": 2.0, "maxNegAcc": 4.5, "usualPosAcc": 2.0, "usualNegAcc": 4.5, "minGap": 2.5, "maxSpeed": 11.111, "headwayTime": 2}, "route": ["road_8_16_2", "road_7_16_3", "road_7_15_3", "road_7_14_3", "road_7_13_3", "road_7_12_3", "road_7_11_3", "road_7_10_0"], "interval": 1.0, "startTime": 242, "endTime": 242},
{"vehicle": {"length": 5.0, "width": 2.0, "maxPosAcc": 2.0, "maxNegAcc": 4.5, "usualPosAcc": 2.0, "usualNegAcc": 4.5, "minGap": 2.5, "maxSpeed": 11.111, "headwayTime": 2}, "route": ["road_8_19_2", "road_7_19_1", "road_7_20_1", "road_7_21_1", "road_7_22_1", "road_7_23_1", "road_7_24_0"], "interval": 1.0, "startTime": 242, "endTime": 242},
{"vehicle": {"length": 5.0, "width": 2.0, "maxPosAcc": 2.0, "maxNegAcc": 4.5, "usualPosAcc": 2.0, "usualNegAcc": 4.5, "minGap": 2.5, "maxSpeed": 11.111, "headwayTime": 2}, "route": ["road_8_20_2", "road_7_20_3", "road_7_19_2", "road_6_19_2", "road_5_19_2", "road_4_19_2", "road_3_19_3", "road_3_18_3", "road_3_17_3", "road_3_16_3", "road_3_15_2", "road_2_15_2", "road_1_15_2"], "interval": 1.0, "startTime": 242, "endTime": 242},
{"vehicle": {"length": 5.0, "width": 2.0, "maxPosAcc": 2.0, "maxNegAcc": 4.5, "usualPosAcc": 2.0, "usualNegAcc": 4.5, "minGap": 2.5, "maxSpeed": 11.111, "headwayTime": 2}, "route": ["road_8_21_2", "road_7_21_3", "road_7_20_3", "road_7_19_3", "road_7_18_3", "road_7_17_3", "road_7_16_3", "road_7_15_3", "road_7_14_3", "road_7_13_3", "road_7_12_3", "road_7_11_3", "road_7_10_2", "road_6_10_2", "road_5_10_2", "road_4_10_2", "road_3_10_3", "road_3_9_3", "road_3_8_3", "road_3_7_3", "road_3_6_3", "road_3_5_3", "road_3_4_3", "road_3_3_3", "road_3_2_3", "road_3_1_3"], "interval": 1.0, "startTime": 242, "endTime": 242},
{"vehicle": {"length": 5.0, "width": 2.0, "maxPosAcc": 2.0, "maxNegAcc": 4.5, "usualPosAcc": 2.0, "usualNegAcc": 4.5, "minGap": 2.5, "maxSpeed": 11.111, "headwayTime": 2}, "route": ["road_0_24_0", "road_1_24_0", "road_2_24_1", "road_2_25_1", "road_2_26_1", "road_2_27_1", "road_2_28_0", "road_3_28_1"], "interval": 1.0, "startTime": 242, "endTime": 242},
{"vehicle": {"length": 5.0, "width": 2.0, "maxPosAcc": 2.0, "maxNegAcc": 4.5, "usualPosAcc": 2.0, "usualNegAcc": 4.5, "minGap": 2.5, "maxSpeed": 11.111, "headwayTime": 2}, "route": ["road_0_8_0", "road_1_8_0", "road_2_8_3", "road_2_7_3", "road_2_6_3", "road_2_5_3", "road_2_4_3", "road_2_3_3", "road_2_2_3", "road_2_1_2", "road_1_1_3"], "interval": 1.0, "startTime": 242, "endTime": 242},
{"vehicle": {"length": 5.0, "width": 2.0, "maxPosAcc": 2.0, "maxNegAcc": 4.5, "usualPosAcc": 2.0, "usualNegAcc": 4.5, "minGap": 2.5, "maxSpeed": 11.111, "headwayTime": 2}, "route": ["road_1_0_1", "road_1_1_1", "road_1_2_0", "road_2_2_1", "road_2_3_1", "road_2_4_1", "road_2_5_1", "road_2_6_1", "road_2_7_1", "road_2_8_1", "road_2_9_1", "road_2_10_1", "road_2_11_1", "road_2_12_1", "road_2_13_1", "road_2_14_1", "road_2_15_1", "road_2_16_1", "road_2_17_1", "road_2_18_1", "road_2_19_1", "road_2_20_1", "road_2_21_1", "road_2_22_1", "road_2_23_1", "road_2_24_1", "road_2_25_1", "road_2_26_1", "road_2_27_1", "road_2_28_1"], "interval": 1.0, "startTime": 242, "endTime": 242},
{"vehicle": {"length": 5.0, "width": 2.0, "maxPosAcc": 2.0, "maxNegAcc": 4.5, "usualPosAcc": 2.0, "usualNegAcc": 4.5, "minGap": 2.5, "maxSpeed": 11.111, "headwayTime": 2}, "route": ["road_3_0_1", "road_3_1_2", "road_2_1_1", "road_2_2_0", "road_3_2_0", "road_4_2_0", "road_5_2_0", "road_6_2_0", "road_7_2_1", "road_7_3_1", "road_7_4_1", "road_7_5_1", "road_7_6_1", "road_7_7_1", "road_7_8_1", "road_7_9_1", "road_7_10_0"], "interval": 1.0, "startTime": 242, "endTime": 242},
{"vehicle": {"length": 5.0, "width": 2.0, "maxPosAcc": 2.0, "maxNegAcc": 4.5, "usualPosAcc": 2.0, "usualNegAcc": 4.5, "minGap": 2.5, "maxSpeed": 11.111, "headwayTime": 2}, "route": ["road_4_0_1", "road_4_1_2", "road_3_1_3"], "interval": 1.0, "startTime": 242, "endTime": 242},
{"vehicle": {"length": 5.0, "width": 2.0, "maxPosAcc": 2.0, "maxNegAcc": 4.5, "usualPosAcc": 2.0, "usualNegAcc": 4.5, "minGap": 2.5, "maxSpeed": 11.111, "headwayTime": 2}, "route": ["road_5_0_1", "road_5_1_2", "road_4_1_2", "road_3_1_2", "road_2_1_3"], "interval": 1.0, "startTime": 242, "endTime": 242},
{"vehicle": {"length": 5.0, "width": 2.0, "maxPosAcc": 2.0, "maxNegAcc": 4.5, "usualPosAcc": 2.0, "usualNegAcc": 4.5, "minGap": 2.5, "maxSpeed": 11.111, "headwayTime": 2}, "route": ["road_0_13_0", "road_1_13_1", "road_1_14_0", "road_2_14_0", "road_3_14_0", "road_4_14_0", "road_5_14_0", "road_6_14_0", "road_7_14_1", "road_7_15_1", "road_7_16_1", "road_7_17_1", "road_7_18_1", "road_7_19_1", "road_7_20_1", "road_7_21_1", "road_7_22_1", "road_7_23_0"], "interval": 1.0, "startTime": 242, "endTime": 242},
{"vehicle": {"length": 5.0, "width": 2.0, "maxPosAcc": 2.0, "maxNegAcc": 4.5, "usualPosAcc": 2.0, "usualNegAcc": 4.5, "minGap": 2.5, "maxSpeed": 11.111, "headwayTime": 2}, "route": ["road_0_2_0", "road_1_2_1", "road_1_3_1", "road_1_4_1", "road_1_5_1", "road_1_6_1", "road_1_7_1", "road_1_8_1", "road_1_9_1", "road_1_10_1", "road_1_11_1", "road_1_12_2"], "interval": 1.0, "startTime": 242, "endTime": 242},
{"vehicle": {"length": 5.0, "width": 2.0, "maxPosAcc": 2.0, "maxNegAcc": 4.5, "usualPosAcc": 2.0, "usualNegAcc": 4.5, "minGap": 2.5, "maxSpeed": 11.111, "headwayTime": 2}, "route": ["road_0_22_0", "road_1_22_0", "road_2_22_3", "road_2_21_3", "road_2_20_3", "road_2_19_3", "road_2_18_3", "road_2_17_2", "road_1_17_2"], "interval": 1.0, "startTime": 242, "endTime": 242},
{"vehicle": {"length": 5.0, "width": 2.0, "maxPosAcc": 2.0, "maxNegAcc": 4.5, "usualPosAcc": 2.0, "usualNegAcc": 4.5, "minGap": 2.5, "maxSpeed": 11.111, "headwayTime": 2}, "route": ["road_0_10_0", "road_1_10_1", "road_1_11_1", "road_1_12_1", "road_1_13_1", "road_1_14_1", "road_1_15_1", "road_1_16_1", "road_1_17_1", "road_1_18_1", "road_1_19_1", "road_1_20_1", "road_1_21_1", "road_1_22_1", "road_1_23_1", "road_1_24_2"], "interval": 1.0, "startTime": 242, "endTime": 242},
{"vehicle": {"length": 5.0, "width": 2.0, "maxPosAcc": 2.0, "maxNegAcc": 4.5, "usualPosAcc": 2.0, "usualNegAcc": 4.5, "minGap": 2.5, "maxSpeed": 11.111, "headwayTime": 2}, "route": ["road_0_27_0", "road_1_27_1", "road_1_28_0", "road_2_28_0", "road_3_28_0", "road_4_28_0", "road_5_28_3", "road_5_27_3", "road_5_26_3", "road_5_25_3", "road_5_24_3", "road_5_23_3", "road_5_22_3", "road_5_21_3", "road_5_20_3", "road_5_19_3", "road_5_18_3", "road_5_17_0", "road_6_17_0", "road_7_17_3", "road_7_16_3", "road_7_15_3", "road_7_14_3", "road_7_13_3", "road_7_12_3", "road_7_11_3", "road_7_10_3", "road_7_9_3", "road_7_8_3", "road_7_7_3", "road_7_6_3", "road_7_5_3", "road_7_4_3", "road_7_3_0"], "interval": 1.0, "startTime": 242, "endTime": 242},
{"vehicle": {"length": 5.0, "width": 2.0, "maxPosAcc": 2.0, "maxNegAcc": 4.5, "usualPosAcc": 2.0, "usualNegAcc": 4.5, "minGap": 2.5, "maxSpeed": 11.111, "headwayTime": 2}, "route": ["road_0_16_0", "road_1_16_0", "road_2_16_3", "road_2_15_3", "road_2_14_3", "road_2_13_3", "road_2_12_3", "road_2_11_3", "road_2_10_3", "road_2_9_3", "road_2_8_3", "road_2_7_3", "road_2_6_3", "road_2_5_3", "road_2_4_3", "road_2_3_3", "road_2_2_3", "road_2_1_2", "road_1_1_3"], "interval": 1.0, "startTime": 242, "endTime": 242},
{"vehicle": {"length": 5.0, "width": 2.0, "maxPosAcc": 2.0, "maxNegAcc": 4.5, "usualPosAcc": 2.0, "usualNegAcc": 4.5, "minGap": 2.5, "maxSpeed": 11.111, "headwayTime": 2}, "route": ["road_0_5_0", "road_1_5_1", "road_1_6_0", "road_2_6_3", "road_2_5_3", "road_2_4_3", "road_2_3_3", "road_2_2_3", "road_2_1_2", "road_1_1_3"], "interval": 1.0, "startTime": 242, "endTime": 242},
{"vehicle": {"length": 5.0, "width": 2.0, "maxPosAcc": 2.0, "maxNegAcc": 4.5, "usualPosAcc": 2.0, "usualNegAcc": 4.5, "minGap": 2.5, "maxSpeed": 11.111, "headwayTime": 2}, "route": ["road_0_18_0", "road_1_18_0", "road_2_18_0", "road_3_18_0", "road_4_18_0", "road_5_18_0", "road_6_18_0", "road_7_18_1", "road_7_19_1", "road_7_20_1", "road_7_21_1", "road_7_22_1", "road_7_23_1", "road_7_24_0"], "interval": 1.0, "startTime": 242, "endTime": 242},
{"vehicle": {"length": 5.0, "width": 2.0, "maxPosAcc": 2.0, "maxNegAcc": 4.5, "usualPosAcc": 2.0, "usualNegAcc": 4.5, "minGap": 2.5, "maxSpeed": 11.111, "headwayTime": 2}, "route": ["road_0_20_0", "road_1_20_0", "road_2_20_3", "road_2_19_3", "road_2_18_3", "road_2_17_3", "road_2_16_3", "road_2_15_3", "road_2_14_3", "road_2_13_3", "road_2_12_3", "road_2_11_3", "road_2_10_3", "road_2_9_3", "road_2_8_3", "road_2_7_3", "road_2_6_3", "road_2_5_3", "road_2_4_3", "road_2_3_3", "road_2_2_3", "road_2_1_2", "road_1_1_3"], "interval": 1.0, "startTime": 242, "endTime": 242},
{"vehicle": {"length": 5.0, "width": 2.0, "maxPosAcc": 2.0, "maxNegAcc": 4.5, "usualPosAcc": 2.0, "usualNegAcc": 4.5, "minGap": 2.5, "maxSpeed": 11.111, "headwayTime": 2}, "route": ["road_0_12_0", "road_1_12_0", "road_2_12_1", "road_2_13_1", "road_2_14_1", "road_2_15_1", "road_2_16_1", "road_2_17_1", "road_2_18_1", "road_2_19_1", "road_2_20_1", "road_2_21_1", "road_2_22_1", "road_2_23_1", "road_2_24_1", "road_2_25_1", "road_2_26_0", "road_3_26_0", "road_4_26_0", "road_5_26_0", "road_6_26_1", "road_6_27_1", "road_6_28_1"], "interval": 1.0, "startTime": 242, "endTime": 242},
{"vehicle": {"length": 5.0, "width": 2.0, "maxPosAcc": 2.0, "maxNegAcc": 4.5, "usualPosAcc": 2.0, "usualNegAcc": 4.5, "minGap": 2.5, "maxSpeed": 11.111, "headwayTime": 2}, "route": ["road_5_29_3", "road_5_28_3", "road_5_27_2", "road_4_27_2", "road_3_27_2", "road_2_27_2", "road_1_27_1", "road_1_28_1"], "interval": 1.0, "startTime": 242, "endTime": 242},
{"vehicle": {"length": 5.0, "width": 2.0, "maxPosAcc": 2.0, "maxNegAcc": 4.5, "usualPosAcc": 2.0, "usualNegAcc": 4.5, "minGap": 2.5, "maxSpeed": 11.111, "headwayTime": 2}, "route": ["road_1_29_3", "road_1_28_0", "road_2_28_3", "road_2_27_3", "road_2_26_3", "road_2_25_3", "road_2_24_3", "road_2_23_3", "road_2_22_3", "road_2_21_3", "road_2_20_3", "road_2_19_3", "road_2_18_3", "road_2_17_3", "road_2_16_3", "road_2_15_3", "road_2_14_3", "road_2_13_3", "road_2_12_3", "road_2_11_3", "road_2_10_3", "road_2_9_3", "road_2_8_3", "road_2_7_3", "road_2_6_3", "road_2_5_3", "road_2_4_3", "road_2_3_3", "road_2_2_3", "road_2_1_2", "road_1_1_3"], "interval": 1.0, "startTime": 242, "endTime": 242},
{"vehicle": {"length": 5.0, "width": 2.0, "maxPosAcc": 2.0, "maxNegAcc": 4.5, "usualPosAcc": 2.0, "usualNegAcc": 4.5, "minGap": 2.5, "maxSpeed": 11.111, "headwayTime": 2}, "route": ["road_3_29_3", "road_3_28_0", "road_4_28_0", "road_5_28_3", "road_5_27_3", "road_5_26_3", "road_5_25_3", "road_5_24_3", "road_5_23_3", "road_5_22_3", "road_5_21_3", "road_5_20_3", "road_5_19_3", "road_5_18_0", "road_6_18_0", "road_7_18_3", "road_7_17_3", "road_7_16_3", "road_7_15_0"], "interval": 1.0, "startTime": 242, "endTime": 242},
{"vehicle": {"length": 5.0, "width": 2.0, "maxPosAcc": 2.0, "maxNegAcc": 4.5, "usualPosAcc": 2.0, "usualNegAcc": 4.5, "minGap": 2.5, "maxSpeed": 11.111, "headwayTime": 2}, "route": ["road_4_29_3", "road_4_28_0", "road_5_28_0", "road_6_28_1"], "interval": 1.0, "startTime": 242, "endTime": 242},
{"vehicle": {"length": 5.0, "width": 2.0, "maxPosAcc": 2.0, "maxNegAcc": 4.5, "usualPosAcc": 2.0, "usualNegAcc": 4.5, "minGap": 2.5, "maxSpeed": 11.111, "headwayTime": 2}, "route": ["road_6_29_3", "road_6_28_0", "road_7_28_3", "road_7_27_2", "road_6_27_2", "road_5_27_3", "road_5_26_3", "road_5_25_2", "road_4_25_2", "road_3_25_2", "road_2_25_3", "road_2_24_3", "road_2_23_3", "road_2_22_3", "road_2_21_3", "road_2_20_3", "road_2_19_3", "road_2_18_3", "road_2_17_3", "road_2_16_3", "road_2_15_3", "road_2_14_3", "road_2_13_3", "road_2_12_3", "road_2_11_3", "road_2_10_3", "road_2_9_3", "road_2_8_3", "road_2_7_3", "road_2_6_3", "road_2_5_3", "road_2_4_3", "road_2_3_3", "road_2_2_3", "road_2_1_2", "road_1_1_1", "road_1_2_2"], "interval": 1.0, "startTime": 242, "endTime": 242},
{"vehicle": {"length": 5.0, "width": 2.0, "maxPosAcc": 2.0, "maxNegAcc": 4.5, "usualPosAcc": 2.0, "usualNegAcc": 4.5, "minGap": 2.5, "maxSpeed": 11.111, "headwayTime": 2}, "route": ["road_0_9_0", "road_1_9_1", "road_1_10_0", "road_2_10_3", "road_2_9_3", "road_2_8_3", "road_2_7_3", "road_2_6_3", "road_2_5_3", "road_2_4_3", "road_2_3_3", "road_2_2_3", "road_2_1_2", "road_1_1_3"], "interval": 1.0, "startTime": 242, "endTime": 242},
{"vehicle": {"length": 5.0, "width": 2.0, "maxPosAcc": 2.0, "maxNegAcc": 4.5, "usualPosAcc": 2.0, "usualNegAcc": 4.5, "minGap": 2.5, "maxSpeed": 11.111, "headwayTime": 2}, "route": ["road_0_3_0", "road_1_3_0", "road_2_3_3", "road_2_2_0", "road_3_2_0", "road_4_2_0", "road_5_2_0", "road_6_2_0", "road_7_2_3", "road_7_1_2", "road_6_1_3"], "interval": 1.0, "startTime": 242, "endTime": 242},
{"vehicle": {"length": 5.0, "width": 2.0, "maxPosAcc": 2.0, "maxNegAcc": 4.5, "usualPosAcc": 2.0, "usualNegAcc": 4.5, "minGap": 2.5, "maxSpeed": 11.111, "headwayTime": 2}, "route": ["road_0_4_0", "road_1_4_1", "road_1_5_1", "road_1_6_0", "road_2_6_3", "road_2_5_3", "road_2_4_3", "road_2_3_3", "road_2_2_3", "road_2_1_2", "road_1_1_3"], "interval": 1.0, "startTime": 242, "endTime": 242},
{"vehicle": {"length": 5.0, "width": 2.0, "maxPosAcc": 2.0, "maxNegAcc": 4.5, "usualPosAcc": 2.0, "usualNegAcc": 4.5, "minGap": 2.5, "maxSpeed": 11.111, "headwayTime": 2}, "route": ["road_0_7_0", "road_1_7_1", "road_1_8_0", "road_2_8_3", "road_2_7_3", "road_2_6_3", "road_2_5_3", "road_2_4_3", "road_2_3_3", "road_2_2_3", "road_2_1_2", "road_1_1_3"], "interval": 1.0, "startTime": 242, "endTime": 242},
{"vehicle": {"length": 5.0, "width": 2.0, "maxPosAcc": 2.0, "maxNegAcc": 4.5, "usualPosAcc": 2.0, "usualNegAcc": 4.5, "minGap": 2.5, "maxSpeed": 11.111, "headwayTime": 2}, "route": ["road_0_14_0", "road_1_14_1", "road_1_15_1", "road_1_16_1", "road_1_17_1", "road_1_18_1", "road_1_19_1", "road_1_20_1", "road_1_21_1", "road_1_22_1", "road_1_23_1", "road_1_24_1", "road_1_25_1", "road_1_26_1", "road_1_27_1", "road_1_28_1"], "interval": 1.0, "startTime": 242, "endTime": 242},
{"vehicle": {"length": 5.0, "width": 2.0, "maxPosAcc": 2.0, "maxNegAcc": 4.5, "usualPosAcc": 2.0, "usualNegAcc": 4.5, "minGap": 2.5, "maxSpeed": 11.111, "headwayTime": 2}, "route": ["road_0_15_0", "road_1_15_1", "road_1_16_0", "road_2_16_1", "road_2_17_1", "road_2_18_1", "road_2_19_1", "road_2_20_1", "road_2_21_1", "road_2_22_1", "road_2_23_1", "road_2_24_1", "road_2_25_1", "road_2_26_1", "road_2_27_1", "road_2_28_0", "road_3_28_1"], "interval": 1.0, "startTime": 242, "endTime": 242},
{"vehicle": {"length": 5.0, "width": 2.0, "maxPosAcc": 2.0, "maxNegAcc": 4.5, "usualPosAcc": 2.0, "usualNegAcc": 4.5, "minGap": 2.5, "maxSpeed": 11.111, "headwayTime": 2}, "route": ["road_0_17_0", "road_1_17_0", "road_2_17_3", "road_2_16_3", "road_2_15_3", "road_2_14_3", "road_2_13_3", "road_2_12_3", "road_2_11_3", "road_2_10_3", "road_2_9_3", "road_2_8_3", "road_2_7_3", "road_2_6_3", "road_2_5_3", "road_2_4_3", "road_2_3_3", "road_2_2_3", "road_2_1_2", "road_1_1_3"], "interval": 1.0, "startTime": 242, "endTime": 242},
{"vehicle": {"length": 5.0, "width": 2.0, "maxPosAcc": 2.0, "maxNegAcc": 4.5, "usualPosAcc": 2.0, "usualNegAcc": 4.5, "minGap": 2.5, "maxSpeed": 11.111, "headwayTime": 2}, "route": ["road_0_19_0", "road_1_19_1", "road_1_20_1", "road_1_21_1", "road_1_22_2"], "interval": 1.0, "startTime": 242, "endTime": 242},
{"vehicle": {"length": 5.0, "width": 2.0, "maxPosAcc": 2.0, "maxNegAcc": 4.5, "usualPosAcc": 2.0, "usualNegAcc": 4.5, "minGap": 2.5, "maxSpeed": 11.111, "headwayTime": 2}, "route": ["road_2_0_1", "road_2_1_2", "road_1_1_3"], "interval": 1.0, "startTime": 242, "endTime": 242},
{"vehicle": {"length": 5.0, "width": 2.0, "maxPosAcc": 2.0, "maxNegAcc": 4.5, "usualPosAcc": 2.0, "usualNegAcc": 4.5, "minGap": 2.5, "maxSpeed": 11.111, "headwayTime": 2}, "route": ["road_2_29_3", "road_2_28_3", "road_2_27_3", "road_2_26_3", "road_2_25_3", "road_2_24_3", "road_2_23_3", "road_2_22_3", "road_2_21_3", "road_2_20_3", "road_2_19_3", "road_2_18_3", "road_2_17_3", "road_2_16_3", "road_2_15_3", "road_2_14_3", "road_2_13_3", "road_2_12_3", "road_2_11_3", "road_2_10_3", "road_2_9_3", "road_2_8_3", "road_2_7_3", "road_2_6_3", "road_2_5_3", "road_2_4_3", "road_2_3_3", "road_2_2_3", "road_2_1_2", "road_1_1_3"], "interval": 1.0, "startTime": 242, "endTime": 242},
{"vehicle": {"length": 5.0, "width": 2.0, "maxPosAcc": 2.0, "maxNegAcc": 4.5, "usualPosAcc": 2.0, "usualNegAcc": 4.5, "minGap": 2.5, "maxSpeed": 11.111, "headwayTime": 2}, "route": ["road_7_0_1", "road_7_1_1", "road_7_2_1", "road_7_3_1", "road_7_4_1", "road_7_5_1", "road_7_6_1", "road_7_7_1", "road_7_8_1", "road_7_9_1", "road_7_10_1", "road_7_11_1", "road_7_12_1", "road_7_13_1", "road_7_14_1", "road_7_15_1", "road_7_16_1", "road_7_17_1", "road_7_18_0"], "interval": 1.0, "startTime": 243, "endTime": 243},
{"vehicle": {"length": 5.0, "width": 2.0, "maxPosAcc": 2.0, "maxNegAcc": 4.5, "usualPosAcc": 2.0, "usualNegAcc": 4.5, "minGap": 2.5, "maxSpeed": 11.111, "headwayTime": 2}, "route": ["road_7_29_3", "road_7_28_3", "road_7_27_2", "road_6_27_2", "road_5_27_3", "road_5_26_3", "road_5_25_2", "road_4_25_2", "road_3_25_2", "road_2_25_3", "road_2_24_3", "road_2_23_3", "road_2_22_3", "road_2_21_3", "road_2_20_3", "road_2_19_3", "road_2_18_3", "road_2_17_2", "road_1_17_1", "road_1_18_2"], "interval": 1.0, "startTime": 243, "endTime": 243},
{"vehicle": {"length": 5.0, "width": 2.0, "maxPosAcc": 2.0, "maxNegAcc": 4.5, "usualPosAcc": 2.0, "usualNegAcc": 4.5, "minGap": 2.5, "maxSpeed": 11.111, "headwayTime": 2}, "route": ["road_1_0_1", "road_1_1_1", "road_1_2_0", "road_2_2_0", "road_3_2_0", "road_4_2_0", "road_5_2_0", "road_6_2_0", "road_7_2_1", "road_7_3_1", "road_7_4_1", "road_7_5_1", "road_7_6_1", "road_7_7_1", "road_7_8_1", "road_7_9_1", "road_7_10_1", "road_7_11_1", "road_7_12_1", "road_7_13_1", "road_7_14_1", "road_7_15_0"], "interval": 1.0, "startTime": 243, "endTime": 243},
{"vehicle": {"length": 5.0, "width": 2.0, "maxPosAcc": 2.0, "maxNegAcc": 4.5, "usualPosAcc": 2.0, "usualNegAcc": 4.5, "minGap": 2.5, "maxSpeed": 11.111, "headwayTime": 2}, "route": ["road_0_5_0", "road_1_5_1", "road_1_6_1", "road_1_7_1", "road_1_8_0", "road_2_8_1", "road_2_9_1", "road_2_10_1", "road_2_11_1", "road_2_12_1", "road_2_13_1", "road_2_14_1", "road_2_15_1", "road_2_16_1", "road_2_17_1", "road_2_18_1", "road_2_19_1", "road_2_20_1", "road_2_21_1", "road_2_22_1", "road_2_23_1", "road_2_24_1", "road_2_25_1", "road_2_26_0", "road_3_26_0", "road_4_26_1", "road_4_27_1", "road_4_28_0", "road_5_28_1"], "interval": 1.0, "startTime": 243, "endTime": 243},
{"vehicle": {"length": 5.0, "width": 2.0, "maxPosAcc": 2.0, "maxNegAcc": 4.5, "usualPosAcc": 2.0, "usualNegAcc": 4.5, "minGap": 2.5, "maxSpeed": 11.111, "headwayTime": 2}, "route": ["road_1_0_1", "road_1_1_1", "road_1_2_1", "road_1_3_1", "road_1_4_1", "road_1_5_2"], "interval": 1.0, "startTime": 244, "endTime": 244},
{"vehicle": {"length": 5.0, "width": 2.0, "maxPosAcc": 2.0, "maxNegAcc": 4.5, "usualPosAcc": 2.0, "usualNegAcc": 4.5, "minGap": 2.5, "maxSpeed": 11.111, "headwayTime": 2}, "route": ["road_2_0_1", "road_2_1_1", "road_2_2_0", "road_3_2_3", "road_3_1_3"], "interval": 1.0, "startTime": 245, "endTime": 245},
{"vehicle": {"length": 5.0, "width": 2.0, "maxPosAcc": 2.0, "maxNegAcc": 4.5, "usualPosAcc": 2.0, "usualNegAcc": 4.5, "minGap": 2.5, "maxSpeed": 11.111, "headwayTime": 2}, "route": ["road_8_17_2", "road_7_17_2", "road_6_17_2", "road_5_17_2", "road_4_17_2", "road_3_17_2", "road_2_17_2", "road_1_17_1", "road_1_18_1", "road_1_19_1", "road_1_20_1", "road_1_21_1", "road_1_22_1", "road_1_23_1", "road_1_24_1", "road_1_25_1", "road_1_26_1", "road_1_27_2"], "interval": 1.0, "startTime": 246, "endTime": 246},
{"vehicle": {"length": 5.0, "width": 2.0, "maxPosAcc": 2.0, "maxNegAcc": 4.5, "usualPosAcc": 2.0, "usualNegAcc": 4.5, "minGap": 2.5, "maxSpeed": 11.111, "headwayTime": 2}, "route": ["road_5_0_1", "road_5_1_2", "road_4_1_2", "road_3_1_2", "road_2_1_2", "road_1_1_3"], "interval": 1.0, "startTime": 246, "endTime": 246},
{"vehicle": {"length": 5.0, "width": 2.0, "maxPosAcc": 2.0, "maxNegAcc": 4.5, "usualPosAcc": 2.0, "usualNegAcc": 4.5, "minGap": 2.5, "maxSpeed": 11.111, "headwayTime": 2}, "route": ["road_0_26_0", "road_1_26_0", "road_2_26_3", "road_2_25_3", "road_2_24_3", "road_2_23_3", "road_2_22_3", "road_2_21_3", "road_2_20_3", "road_2_19_3", "road_2_18_3", "road_2_17_3", "road_2_16_3", "road_2_15_3", "road_2_14_3", "road_2_13_2", "road_1_13_2"], "interval": 1.0, "startTime": 246, "endTime": 246},
{"vehicle": {"length": 5.0, "width": 2.0, "maxPosAcc": 2.0, "maxNegAcc": 4.5, "usualPosAcc": 2.0, "usualNegAcc": 4.5, "minGap": 2.5, "maxSpeed": 11.111, "headwayTime": 2}, "route": ["road_8_25_2", "road_7_25_2", "road_6_25_2", "road_5_25_2", "road_4_25_2", "road_3_25_2", "road_2_25_3", "road_2_24_3", "road_2_23_3", "road_2_22_3", "road_2_21_3", "road_2_20_3", "road_2_19_3", "road_2_18_3", "road_2_17_2", "road_1_17_1", "road_1_18_2"], "interval": 1.0, "startTime": 248, "endTime": 248},
{"vehicle": {"length": 5.0, "width": 2.0, "maxPosAcc": 2.0, "maxNegAcc": 4.5, "usualPosAcc": 2.0, "usualNegAcc": 4.5, "minGap": 2.5, "maxSpeed": 11.111, "headwayTime": 2}, "route": ["road_1_0_1", "road_1_1_1", "road_1_2_0", "road_2_2_3", "road_2_1_3"], "interval": 1.0, "startTime": 248, "endTime": 248},
{"vehicle": {"length": 5.0, "width": 2.0, "maxPosAcc": 2.0, "maxNegAcc": 4.5, "usualPosAcc": 2.0, "usualNegAcc": 4.5, "minGap": 2.5, "maxSpeed": 11.111, "headwayTime": 2}, "route": ["road_4_0_1", "road_4_1_2", "road_3_1_3"], "interval": 1.0, "startTime": 248, "endTime": 248},
{"vehicle": {"length": 5.0, "width": 2.0, "maxPosAcc": 2.0, "maxNegAcc": 4.5, "usualPosAcc": 2.0, "usualNegAcc": 4.5, "minGap": 2.5, "maxSpeed": 11.111, "headwayTime": 2}, "route": ["road_5_0_1", "road_5_1_2", "road_4_1_1", "road_4_2_0", "road_5_2_0", "road_6_2_0", "road_7_2_1", "road_7_3_1", "road_7_4_1", "road_7_5_1", "road_7_6_1", "road_7_7_1", "road_7_8_1", "road_7_9_1", "road_7_10_1", "road_7_11_1", "road_7_12_1", "road_7_13_1", "road_7_14_1", "road_7_15_1", "road_7_16_1", "road_7_17_1", "road_7_18_1", "road_7_19_1", "road_7_20_1", "road_7_21_1", "road_7_22_1", "road_7_23_1", "road_7_24_1", "road_7_25_0"], "interval": 1.0, "startTime": 248, "endTime": 248},
{"vehicle": {"length": 5.0, "width": 2.0, "maxPosAcc": 2.0, "maxNegAcc": 4.5, "usualPosAcc": 2.0, "usualNegAcc": 4.5, "minGap": 2.5, "maxSpeed": 11.111, "headwayTime": 2}, "route": ["road_0_20_0", "road_1_20_0", "road_2_20_3", "road_2_19_3", "road_2_18_3", "road_2_17_3", "road_2_16_3", "road_2_15_3", "road_2_14_3", "road_2_13_3", "road_2_12_3", "road_2_11_3", "road_2_10_3", "road_2_9_3", "road_2_8_3", "road_2_7_3", "road_2_6_3", "road_2_5_3", "road_2_4_3", "road_2_3_3", "road_2_2_3", "road_2_1_2", "road_1_1_1", "road_1_2_2"], "interval": 1.0, "startTime": 248, "endTime": 248},
{"vehicle": {"length": 5.0, "width": 2.0, "maxPosAcc": 2.0, "maxNegAcc": 4.5, "usualPosAcc": 2.0, "usualNegAcc": 4.5, "minGap": 2.5, "maxSpeed": 11.111, "headwayTime": 2}, "route": ["road_6_29_3", "road_6_28_0", "road_7_28_3", "road_7_27_2", "road_6_27_2", "road_5_27_2", "road_4_27_1", "road_4_28_0", "road_5_28_1"], "interval": 1.0, "startTime": 248, "endTime": 248},
{"vehicle": {"length": 5.0, "width": 2.0, "maxPosAcc": 2.0, "maxNegAcc": 4.5, "usualPosAcc": 2.0, "usualNegAcc": 4.5, "minGap": 2.5, "maxSpeed": 11.111, "headwayTime": 2}, "route": ["road_1_0_1", "road_1_1_1", "road_1_2_0", "road_2_2_1", "road_2_3_1", "road_2_4_1", "road_2_5_1", "road_2_6_1", "road_2_7_1", "road_2_8_1", "road_2_9_1", "road_2_10_1", "road_2_11_1", "road_2_12_1", "road_2_13_1", "road_2_14_1", "road_2_15_1", "road_2_16_1", "road_2_17_1", "road_2_18_1", "road_2_19_1", "road_2_20_1", "road_2_21_1", "road_2_22_1", "road_2_23_1", "road_2_24_1", "road_2_25_1", "road_2_26_0", "road_3_26_0", "road_4_26_1", "road_4_27_1", "road_4_28_1"], "interval": 1.0, "startTime": 249, "endTime": 249},
{"vehicle": {"length": 5.0, "width": 2.0, "maxPosAcc": 2.0, "maxNegAcc": 4.5, "usualPosAcc": 2.0, "usualNegAcc": 4.5, "minGap": 2.5, "maxSpeed": 11.111, "headwayTime": 2}, "route": ["road_0_20_0", "road_1_20_0", "road_2_20_3", "road_2_19_3", "road_2_18_3", "road_2_17_3", "road_2_16_3", "road_2_15_3", "road_2_14_3", "road_2_13_3", "road_2_12_3", "road_2_11_3", "road_2_10_3", "road_2_9_3", "road_2_8_3", "road_2_7_3", "road_2_6_3", "road_2_5_3", "road_2_4_3", "road_2_3_3", "road_2_2_3", "road_2_1_2", "road_1_1_3"], "interval": 1.0, "startTime": 249, "endTime": 249},
{"vehicle": {"length": 5.0, "width": 2.0, "maxPosAcc": 2.0, "maxNegAcc": 4.5, "usualPosAcc": 2.0, "usualNegAcc": 4.5, "minGap": 2.5, "maxSpeed": 11.111, "headwayTime": 2}, "route": ["road_4_29_3", "road_4_28_0", "road_5_28_3", "road_5_27_2", "road_4_27_2", "road_3_27_2", "road_2_27_1", "road_2_28_0", "road_3_28_1"], "interval": 1.0, "startTime": 249, "endTime": 249},
{"vehicle": {"length": 5.0, "width": 2.0, "maxPosAcc": 2.0, "maxNegAcc": 4.5, "usualPosAcc": 2.0, "usualNegAcc": 4.5, "minGap": 2.5, "maxSpeed": 11.111, "headwayTime": 2}, "route": ["road_1_0_1", "road_1_1_1", "road_1_2_1", "road_1_3_1", "road_1_4_1", "road_1_5_1", "road_1_6_1", "road_1_7_2"], "interval": 1.0, "startTime": 250, "endTime": 250},
{"vehicle": {"length": 5.0, "width": 2.0, "maxPosAcc": 2.0, "maxNegAcc": 4.5, "usualPosAcc": 2.0, "usualNegAcc": 4.5, "minGap": 2.5, "maxSpeed": 11.111, "headwayTime": 2}, "route": ["road_1_0_1", "road_1_1_1", "road_1_2_1", "road_1_3_1", "road_1_4_1", "road_1_5_1", "road_1_6_1", "road_1_7_1", "road_1_8_1", "road_1_9_1", "road_1_10_1", "road_1_11_1", "road_1_12_1", "road_1_13_1", "road_1_14_1", "road_1_15_1", "road_1_16_1", "road_1_17_1", "road_1_18_1", "road_1_19_1", "road_1_20_1", "road_1_21_1", "road_1_22_1", "road_1_23_1", "road_1_24_1", "road_1_25_1", "road_1_26_1", "road_1_27_1", "road_1_28_1"], "interval": 1.0, "startTime": 251, "endTime": 251},
{"vehicle": {"length": 5.0, "width": 2.0, "maxPosAcc": 2.0, "maxNegAcc": 4.5, "usualPosAcc": 2.0, "usualNegAcc": 4.5, "minGap": 2.5, "maxSpeed": 11.111, "headwayTime": 2}, "route": ["road_0_25_0", "road_1_25_1", "road_1_26_0", "road_2_26_1", "road_2_27_1", "road_2_28_1"], "interval": 1.0, "startTime": 251, "endTime": 251},
{"vehicle": {"length": 5.0, "width": 2.0, "maxPosAcc": 2.0, "maxNegAcc": 4.5, "usualPosAcc": 2.0, "usualNegAcc": 4.5, "minGap": 2.5, "maxSpeed": 11.111, "headwayTime": 2}, "route": ["road_0_22_0", "road_1_22_0", "road_2_22_3", "road_2_21_3", "road_2_20_3", "road_2_19_3", "road_2_18_3", "road_2_17_3", "road_2_16_3", "road_2_15_3", "road_2_14_3", "road_2_13_3", "road_2_12_3", "road_2_11_3", "road_2_10_3", "road_2_9_3", "road_2_8_3", "road_2_7_2", "road_1_7_2"], "interval": 1.0, "startTime": 252, "endTime": 252},
{"vehicle": {"length": 5.0, "width": 2.0, "maxPosAcc": 2.0, "maxNegAcc": 4.5, "usualPosAcc": 2.0, "usualNegAcc": 4.5, "minGap": 2.5, "maxSpeed": 11.111, "headwayTime": 2}, "route": ["road_8_7_2", "road_7_7_1", "road_7_8_1", "road_7_9_1", "road_7_10_1", "road_7_11_1", "road_7_12_1", "road_7_13_1", "road_7_14_1", "road_7_15_1", "road_7_16_1", "road_7_17_1", "road_7_18_1", "road_7_19_1", "road_7_20_1", "road_7_21_1", "road_7_22_1", "road_7_23_1", "road_7_24_1", "road_7_25_1", "road_7_26_1", "road_7_27_2", "road_6_27_2", "road_5_27_2", "road_4_27_1", "road_4_28_0", "road_5_28_1"], "interval": 1.0, "startTime": 253, "endTime": 253},
{"vehicle": {"length": 5.0, "width": 2.0, "maxPosAcc": 2.0, "maxNegAcc": 4.5, "usualPosAcc": 2.0, "usualNegAcc": 4.5, "minGap": 2.5, "maxSpeed": 11.111, "headwayTime": 2}, "route": ["road_0_17_0", "road_1_17_1", "road_1_18_0", "road_2_18_1", "road_2_19_1", "road_2_20_1", "road_2_21_1", "road_2_22_1", "road_2_23_1", "road_2_24_1", "road_2_25_1", "road_2_26_1", "road_2_27_1", "road_2_28_1"], "interval": 1.0, "startTime": 253, "endTime": 253},
{"vehicle": {"length": 5.0, "width": 2.0, "maxPosAcc": 2.0, "maxNegAcc": 4.5, "usualPosAcc": 2.0, "usualNegAcc": 4.5, "minGap": 2.5, "maxSpeed": 11.111, "headwayTime": 2}, "route": ["road_0_23_0", "road_1_23_1", "road_1_24_0", "road_2_24_0", "road_3_24_0", "road_4_24_0", "road_5_24_3", "road_5_23_3", "road_5_22_3", "road_5_21_3", "road_5_20_3", "road_5_19_3", "road_5_18_3", "road_5_17_0", "road_6_17_0", "road_7_17_3", "road_7_16_3", "road_7_15_3", "road_7_14_3", "road_7_13_3", "road_7_12_3", "road_7_11_3", "road_7_10_3", "road_7_9_3", "road_7_8_3", "road_7_7_3", "road_7_6_3", "road_7_5_0"], "interval": 1.0, "startTime": 253, "endTime": 253},
{"vehicle": {"length": 5.0, "width": 2.0, "maxPosAcc": 2.0, "maxNegAcc": 4.5, "usualPosAcc": 2.0, "usualNegAcc": 4.5, "minGap": 2.5, "maxSpeed": 11.111, "headwayTime": 2}, "route": ["road_8_27_2", "road_7_27_3", "road_7_26_3", "road_7_25_3", "road_7_24_3", "road_7_23_3", "road_7_22_3", "road_7_21_3", "road_7_20_3", "road_7_19_3", "road_7_18_3", "road_7_17_3", "road_7_16_3", "road_7_15_3", "road_7_14_3", "road_7_13_3", "road_7_12_3", "road_7_11_3", "road_7_10_3", "road_7_9_0"], "interval": 1.0, "startTime": 254, "endTime": 254},
{"vehicle": {"length": 5.0, "width": 2.0, "maxPosAcc": 2.0, "maxNegAcc": 4.5, "usualPosAcc": 2.0, "usualNegAcc": 4.5, "minGap": 2.5, "maxSpeed": 11.111, "headwayTime": 2}, "route": ["road_1_0_1", "road_1_1_1", "road_1_2_0", "road_2_2_0", "road_3_2_0", "road_4_2_0", "road_5_2_0", "road_6_2_0", "road_7_2_3", "road_7_1_2", "road_6_1_3"], "interval": 1.0, "startTime": 254, "endTime": 254},
{"vehicle": {"length": 5.0, "width": 2.0, "maxPosAcc": 2.0, "maxNegAcc": 4.5, "usualPosAcc": 2.0, "usualNegAcc": 4.5, "minGap": 2.5, "maxSpeed": 11.111, "headwayTime": 2}, "route": ["road_5_29_3", "road_5_28_3", "road_5_27_3", "road_5_26_3", "road_5_25_2", "road_4_25_2", "road_3_25_2", "road_2_25_3", "road_2_24_3", "road_2_23_3", "road_2_22_3", "road_2_21_3", "road_2_20_3", "road_2_19_3", "road_2_18_3", "road_2_17_3", "road_2_16_3", "road_2_15_2", "road_1_15_2"], "interval": 1.0, "startTime": 254, "endTime": 254},
{"vehicle": {"length": 5.0, "width": 2.0, "maxPosAcc": 2.0, "maxNegAcc": 4.5, "usualPosAcc": 2.0, "usualNegAcc": 4.5, "minGap": 2.5, "maxSpeed": 11.111, "headwayTime": 2}, "route": ["road_3_0_1", "road_3_1_2", "road_2_1_2", "road_1_1_3"], "interval": 1.0, "startTime": 255, "endTime": 255},
{"vehicle": {"length": 5.0, "width": 2.0, "maxPosAcc": 2.0, "maxNegAcc": 4.5, "usualPosAcc": 2.0, "usualNegAcc": 4.5, "minGap": 2.5, "maxSpeed": 11.111, "headwayTime": 2}, "route": ["road_4_0_1", "road_4_1_2", "road_3_1_2", "road_2_1_2", "road_1_1_1", "road_1_2_1", "road_1_3_1", "road_1_4_1", "road_1_5_1", "road_1_6_1", "road_1_7_1", "road_1_8_1", "road_1_9_1", "road_1_10_1", "road_1_11_1", "road_1_12_1", "road_1_13_1", "road_1_14_1", "road_1_15_1", "road_1_16_1", "road_1_17_1", "road_1_18_1", "road_1_19_1", "road_1_20_2"], "interval": 1.0, "startTime": 256, "endTime": 256},
{"vehicle": {"length": 5.0, "width": 2.0, "maxPosAcc": 2.0, "maxNegAcc": 4.5, "usualPosAcc": 2.0, "usualNegAcc": 4.5, "minGap": 2.5, "maxSpeed": 11.111, "headwayTime": 2}, "route": ["road_1_29_3", "road_1_28_0", "road_2_28_3", "road_2_27_3", "road_2_26_3", "road_2_25_3", "road_2_24_3", "road_2_23_3", "road_2_22_3", "road_2_21_3", "road_2_20_3", "road_2_19_3", "road_2_18_3", "road_2_17_3", "road_2_16_3", "road_2_15_2", "road_1_15_2"], "interval": 1.0, "startTime": 256, "endTime": 256},
{"vehicle": {"length": 5.0, "width": 2.0, "maxPosAcc": 2.0, "maxNegAcc": 4.5, "usualPosAcc": 2.0, "usualNegAcc": 4.5, "minGap": 2.5, "maxSpeed": 11.111, "headwayTime": 2}, "route": ["road_0_3_0", "road_1_3_1", "road_1_4_1", "road_1_5_1", "road_1_6_1", "road_1_7_1", "road_1_8_1", "road_1_9_1", "road_1_10_1", "road_1_11_1", "road_1_12_1", "road_1_13_1", "road_1_14_1", "road_1_15_1", "road_1_16_1", "road_1_17_1", "road_1_18_1", "road_1_19_1", "road_1_20_1", "road_1_21_1", "road_1_22_1", "road_1_23_1", "road_1_24_1", "road_1_25_1", "road_1_26_1", "road_1_27_1", "road_1_28_1"], "interval": 1.0, "startTime": 256, "endTime": 256},
{"vehicle": {"length": 5.0, "width": 2.0, "maxPosAcc": 2.0, "maxNegAcc": 4.5, "usualPosAcc": 2.0, "usualNegAcc": 4.5, "minGap": 2.5, "maxSpeed": 11.111, "headwayTime": 2}, "route": ["road_1_0_1", "road_1_1_1", "road_1_2_0", "road_2_2_0", "road_3_2_3", "road_3_1_3"], "interval": 1.0, "startTime": 258, "endTime": 258},
{"vehicle": {"length": 5.0, "width": 2.0, "maxPosAcc": 2.0, "maxNegAcc": 4.5, "usualPosAcc": 2.0, "usualNegAcc": 4.5, "minGap": 2.5, "maxSpeed": 11.111, "headwayTime": 2}, "route": ["road_0_12_0", "road_1_12_0", "road_2_12_3", "road_2_11_3", "road_2_10_3", "road_2_9_3", "road_2_8_3", "road_2_7_3", "road_2_6_3", "road_2_5_3", "road_2_4_3", "road_2_3_3", "road_2_2_3", "road_2_1_2", "road_1_1_3"], "interval": 1.0, "startTime": 258, "endTime": 258},
{"vehicle": {"length": 5.0, "width": 2.0, "maxPosAcc": 2.0, "maxNegAcc": 4.5, "usualPosAcc": 2.0, "usualNegAcc": 4.5, "minGap": 2.5, "maxSpeed": 11.111, "headwayTime": 2}, "route": ["road_2_29_3", "road_2_28_0", "road_3_28_3", "road_3_27_2", "road_2_27_3", "road_2_26_3", "road_2_25_3", "road_2_24_3", "road_2_23_3", "road_2_22_3", "road_2_21_3", "road_2_20_3", "road_2_19_3", "road_2_18_3", "road_2_17_3", "road_2_16_3", "road_2_15_3", "road_2_14_3", "road_2_13_3", "road_2_12_3", "road_2_11_3", "road_2_10_3", "road_2_9_3", "road_2_8_3", "road_2_7_3", "road_2_6_3", "road_2_5_3", "road_2_4_3", "road_2_3_3", "road_2_2_3", "road_2_1_2", "road_1_1_3"], "interval": 1.0, "startTime": 258, "endTime": 258},
{"vehicle": {"length": 5.0, "width": 2.0, "maxPosAcc": 2.0, "maxNegAcc": 4.5, "usualPosAcc": 2.0, "usualNegAcc": 4.5, "minGap": 2.5, "maxSpeed": 11.111, "headwayTime": 2}, "route": ["road_2_29_3", "road_2_28_3", "road_2_27_3", "road_2_26_3", "road_2_25_3", "road_2_24_3", "road_2_23_3", "road_2_22_3", "road_2_21_3", "road_2_20_3", "road_2_19_3", "road_2_18_3", "road_2_17_3", "road_2_16_3", "road_2_15_3", "road_2_14_3", "road_2_13_3", "road_2_12_3", "road_2_11_2", "road_1_11_1", "road_1_12_2"], "interval": 1.0, "startTime": 258, "endTime": 258},
{"vehicle": {"length": 5.0, "width": 2.0, "maxPosAcc": 2.0, "maxNegAcc": 4.5, "usualPosAcc": 2.0, "usualNegAcc": 4.5, "minGap": 2.5, "maxSpeed": 11.111, "headwayTime": 2}, "route": ["road_8_9_2", "road_7_9_2", "road_6_9_2", "road_5_9_2", "road_4_9_2", "road_3_9_2", "road_2_9_2", "road_1_9_1", "road_1_10_1", "road_1_11_1", "road_1_12_1", "road_1_13_1", "road_1_14_1", "road_1_15_1", "road_1_16_1", "road_1_17_1", "road_1_18_1", "road_1_19_1", "road_1_20_1", "road_1_21_1", "road_1_22_1", "road_1_23_1", "road_1_24_1", "road_1_25_1", "road_1_26_1", "road_1_27_1", "road_1_28_0", "road_2_28_1"], "interval": 1.0, "startTime": 259, "endTime": 259},
{"vehicle": {"length": 5.0, "width": 2.0, "maxPosAcc": 2.0, "maxNegAcc": 4.5, "usualPosAcc": 2.0, "usualNegAcc": 4.5, "minGap": 2.5, "maxSpeed": 11.111, "headwayTime": 2}, "route": ["road_0_5_0", "road_1_5_1", "road_1_6_0", "road_2_6_3", "road_2_5_3", "road_2_4_3", "road_2_3_3", "road_2_2_3", "road_2_1_2", "road_1_1_3"], "interval": 1.0, "startTime": 259, "endTime": 259},
{"vehicle": {"length": 5.0, "width": 2.0, "maxPosAcc": 2.0, "maxNegAcc": 4.5, "usualPosAcc": 2.0, "usualNegAcc": 4.5, "minGap": 2.5, "maxSpeed": 11.111, "headwayTime": 2}, "route": ["road_0_14_0", "road_1_14_0", "road_2_14_3", "road_2_13_3", "road_2_12_3", "road_2_11_3", "road_2_10_3", "road_2_9_3", "road_2_8_3", "road_2_7_3", "road_2_6_3", "road_2_5_3", "road_2_4_3", "road_2_3_3", "road_2_2_3", "road_2_1_2", "road_1_1_3"], "interval": 1.0, "startTime": 259, "endTime": 259},
{"vehicle": {"length": 5.0, "width": 2.0, "maxPosAcc": 2.0, "maxNegAcc": 4.5, "usualPosAcc": 2.0, "usualNegAcc": 4.5, "minGap": 2.5, "maxSpeed": 11.111, "headwayTime": 2}, "route": ["road_0_19_0", "road_1_19_1", "road_1_20_0", "road_2_20_3", "road_2_19_3", "road_2_18_3", "road_2_17_3", "road_2_16_3", "road_2_15_3", "road_2_14_3", "road_2_13_3", "road_2_12_3", "road_2_11_3", "road_2_10_3", "road_2_9_3", "road_2_8_3", "road_2_7_3", "road_2_6_3", "road_2_5_3", "road_2_4_3", "road_2_3_3", "road_2_2_3", "road_2_1_3"], "interval": 1.0, "startTime": 259, "endTime": 259},
{"vehicle": {"length": 5.0, "width": 2.0, "maxPosAcc": 2.0, "maxNegAcc": 4.5, "usualPosAcc": 2.0, "usualNegAcc": 4.5, "minGap": 2.5, "maxSpeed": 11.111, "headwayTime": 2}, "route": ["road_0_22_0", "road_1_22_0", "road_2_22_3", "road_2_21_3", "road_2_20_3", "road_2_19_3", "road_2_18_3", "road_2_17_3", "road_2_16_3", "road_2_15_3", "road_2_14_3", "road_2_13_3", "road_2_12_3", "road_2_11_3", "road_2_10_3", "road_2_9_3", "road_2_8_3", "road_2_7_2", "road_1_7_1", "road_1_8_2"], "interval": 1.0, "startTime": 260, "endTime": 260},
{"vehicle": {"length": 5.0, "width": 2.0, "maxPosAcc": 2.0, "maxNegAcc": 4.5, "usualPosAcc": 2.0, "usualNegAcc": 4.5, "minGap": 2.5, "maxSpeed": 11.111, "headwayTime": 2}, "route": ["road_0_5_0", "road_1_5_1", "road_1_6_1", "road_1_7_1", "road_1_8_1", "road_1_9_1", "road_1_10_1", "road_1_11_1", "road_1_12_1", "road_1_13_1", "road_1_14_1", "road_1_15_1", "road_1_16_1", "road_1_17_1", "road_1_18_1", "road_1_19_1", "road_1_20_1", "road_1_21_1", "road_1_22_1", "road_1_23_1", "road_1_24_2"], "interval": 1.0, "startTime": 260, "endTime": 260},
{"vehicle": {"length": 5.0, "width": 2.0, "maxPosAcc": 2.0, "maxNegAcc": 4.5, "usualPosAcc": 2.0, "usualNegAcc": 4.5, "minGap": 2.5, "maxSpeed": 11.111, "headwayTime": 2}, "route": ["road_0_11_0", "road_1_11_1", "road_1_12_1", "road_1_13_2"], "interval": 1.0, "startTime": 260, "endTime": 260},
{"vehicle": {"length": 5.0, "width": 2.0, "maxPosAcc": 2.0, "maxNegAcc": 4.5, "usualPosAcc": 2.0, "usualNegAcc": 4.5, "minGap": 2.5, "maxSpeed": 11.111, "headwayTime": 2}, "route": ["road_8_26_2", "road_7_26_3", "road_7_25_2", "road_6_25_2", "road_5_25_2", "road_4_25_2", "road_3_25_2", "road_2_25_3", "road_2_24_3", "road_2_23_3", "road_2_22_3", "road_2_21_3", "road_2_20_3", "road_2_19_3", "road_2_18_3", "road_2_17_2", "road_1_17_2"], "interval": 1.0, "startTime": 261, "endTime": 261},
{"vehicle": {"length": 5.0, "width": 2.0, "maxPosAcc": 2.0, "maxNegAcc": 4.5, "usualPosAcc": 2.0, "usualNegAcc": 4.5, "minGap": 2.5, "maxSpeed": 11.111, "headwayTime": 2}, "route": ["road_4_0_1", "road_4_1_2", "road_3_1_2", "road_2_1_2", "road_1_1_3"], "interval": 1.0, "startTime": 261, "endTime": 261},
{"vehicle": {"length": 5.0, "width": 2.0, "maxPosAcc": 2.0, "maxNegAcc": 4.5, "usualPosAcc": 2.0, "usualNegAcc": 4.5, "minGap": 2.5, "maxSpeed": 11.111, "headwayTime": 2}, "route": ["road_0_16_0", "road_1_16_0", "road_2_16_3", "road_2_15_3", "road_2_14_3", "road_2_13_3", "road_2_12_3", "road_2_11_3", "road_2_10_3", "road_2_9_3", "road_2_8_3", "road_2_7_3", "road_2_6_3", "road_2_5_3", "road_2_4_3", "road_2_3_3", "road_2_2_0", "road_3_2_3", "road_3_1_3"], "interval": 1.0, "startTime": 262, "endTime": 262},
{"vehicle": {"length": 5.0, "width": 2.0, "maxPosAcc": 2.0, "maxNegAcc": 4.5, "usualPosAcc": 2.0, "usualNegAcc": 4.5, "minGap": 2.5, "maxSpeed": 11.111, "headwayTime": 2}, "route": ["road_8_5_2", "road_7_5_2", "road_6_5_2", "road_5_5_2", "road_4_5_2", "road_3_5_2", "road_2_5_2", "road_1_5_1", "road_1_6_2"], "interval": 1.0, "startTime": 263, "endTime": 263},
{"vehicle": {"length": 5.0, "width": 2.0, "maxPosAcc": 2.0, "maxNegAcc": 4.5, "usualPosAcc": 2.0, "usualNegAcc": 4.5, "minGap": 2.5, "maxSpeed": 11.111, "headwayTime": 2}, "route": ["road_0_24_0", "road_1_24_0", "road_2_24_3", "road_2_23_3", "road_2_22_3", "road_2_21_3", "road_2_20_3", "road_2_19_3", "road_2_18_3", "road_2_17_3", "road_2_16_3", "road_2_15_3", "road_2_14_3", "road_2_13_3", "road_2_12_3", "road_2_11_3", "road_2_10_3", "road_2_9_3", "road_2_8_3", "road_2_7_3", "road_2_6_3", "road_2_5_3", "road_2_4_3", "road_2_3_3", "road_2_2_3", "road_2_1_2", "road_1_1_3"], "interval": 1.0, "startTime": 264, "endTime": 264},
{"vehicle": {"length": 5.0, "width": 2.0, "maxPosAcc": 2.0, "maxNegAcc": 4.5, "usualPosAcc": 2.0, "usualNegAcc": 4.5, "minGap": 2.5, "maxSpeed": 11.111, "headwayTime": 2}, "route": ["road_5_29_3", "road_5_28_0", "road_6_28_1"], "interval": 1.0, "startTime": 264, "endTime": 264},
{"vehicle": {"length": 5.0, "width": 2.0, "maxPosAcc": 2.0, "maxNegAcc": 4.5, "usualPosAcc": 2.0, "usualNegAcc": 4.5, "minGap": 2.5, "maxSpeed": 11.111, "headwayTime": 2}, "route": ["road_0_8_0", "road_1_8_0", "road_2_8_3", "road_2_7_3", "road_2_6_3", "road_2_5_3", "road_2_4_3", "road_2_3_3", "road_2_2_3", "road_2_1_2", "road_1_1_3"], "interval": 1.0, "startTime": 265, "endTime": 265},
{"vehicle": {"length": 5.0, "width": 2.0, "maxPosAcc": 2.0, "maxNegAcc": 4.5, "usualPosAcc": 2.0, "usualNegAcc": 4.5, "minGap": 2.5, "maxSpeed": 11.111, "headwayTime": 2}, "route": ["road_8_2_2", "road_7_2_3", "road_7_1_3"], "interval": 1.0, "startTime": 266, "endTime": 266},
{"vehicle": {"length": 5.0, "width": 2.0, "maxPosAcc": 2.0, "maxNegAcc": 4.5, "usualPosAcc": 2.0, "usualNegAcc": 4.5, "minGap": 2.5, "maxSpeed": 11.111, "headwayTime": 2}, "route": ["road_8_6_2", "road_7_6_3", "road_7_5_2", "road_6_5_2", "road_5_5_2", "road_4_5_2", "road_3_5_3", "road_3_4_3", "road_3_3_3", "road_3_2_3", "road_3_1_2", "road_2_1_2", "road_1_1_3"], "interval": 1.0, "startTime": 266, "endTime": 266},
{"vehicle": {"length": 5.0, "width": 2.0, "maxPosAcc": 2.0, "maxNegAcc": 4.5, "usualPosAcc": 2.0, "usualNegAcc": 4.5, "minGap": 2.5, "maxSpeed": 11.111, "headwayTime": 2}, "route": ["road_8_9_2", "road_7_9_2", "road_6_9_2", "road_5_9_2", "road_4_9_2", "road_3_9_3", "road_3_8_3", "road_3_7_3", "road_3_6_3", "road_3_5_3", "road_3_4_3", "road_3_3_3", "road_3_2_3", "road_3_1_2", "road_2_1_2", "road_1_1_3"], "interval": 1.0, "startTime": 266, "endTime": 266},
{"vehicle": {"length": 5.0, "width": 2.0, "maxPosAcc": 2.0, "maxNegAcc": 4.5, "usualPosAcc": 2.0, "usualNegAcc": 4.5, "minGap": 2.5, "maxSpeed": 11.111, "headwayTime": 2}, "route": ["road_8_11_2", "road_7_11_2", "road_6_11_2", "road_5_11_3", "road_5_10_3", "road_5_9_3", "road_5_8_3", "road_5_7_3", "road_5_6_3", "road_5_5_3", "road_5_4_3", "road_5_3_3", "road_5_2_3", "road_5_1_3"], "interval": 1.0, "startTime": 266, "endTime": 266},
{"vehicle": {"length": 5.0, "width": 2.0, "maxPosAcc": 2.0, "maxNegAcc": 4.5, "usualPosAcc": 2.0, "usualNegAcc": 4.5, "minGap": 2.5, "maxSpeed": 11.111, "headwayTime": 2}, "route": ["road_8_12_2", "road_7_12_3", "road_7_11_2", "road_6_11_2", "road_5_11_2", "road_4_11_2", "road_3_11_3", "road_3_10_3", "road_3_9_3", "road_3_8_3", "road_3_7_3", "road_3_6_3", "road_3_5_3", "road_3_4_3", "road_3_3_3", "road_3_2_3", "road_3_1_2", "road_2_1_3"], "interval": 1.0, "startTime": 266, "endTime": 266},
{"vehicle": {"length": 5.0, "width": 2.0, "maxPosAcc": 2.0, "maxNegAcc": 4.5, "usualPosAcc": 2.0, "usualNegAcc": 4.5, "minGap": 2.5, "maxSpeed": 11.111, "headwayTime": 2}, "route": ["road_8_13_2", "road_7_13_2", "road_6_13_2", "road_5_13_3", "road_5_12_3", "road_5_11_3", "road_5_10_2", "road_4_10_2", "road_3_10_3", "road_3_9_3", "road_3_8_3", "road_3_7_3", "road_3_6_3", "road_3_5_3", "road_3_4_3", "road_3_3_3", "road_3_2_3", "road_3_1_2", "road_2_1_2", "road_1_1_3"], "interval": 1.0, "startTime": 266, "endTime": 266},
{"vehicle": {"length": 5.0, "width": 2.0, "maxPosAcc": 2.0, "maxNegAcc": 4.5, "usualPosAcc": 2.0, "usualNegAcc": 4.5, "minGap": 2.5, "maxSpeed": 11.111, "headwayTime": 2}, "route": ["road_8_14_2", "road_7_14_3", "road_7_13_2", "road_6_13_2", "road_5_13_3", "road_5_12_3", "road_5_11_3", "road_5_10_2", "road_4_10_2", "road_3_10_3", "road_3_9_3", "road_3_8_3", "road_3_7_3", "road_3_6_3", "road_3_5_3", "road_3_4_3", "road_3_3_3", "road_3_2_3", "road_3_1_3"], "interval": 1.0, "startTime": 266, "endTime": 266},
{"vehicle": {"length": 5.0, "width": 2.0, "maxPosAcc": 2.0, "maxNegAcc": 4.5, "usualPosAcc": 2.0, "usualNegAcc": 4.5, "minGap": 2.5, "maxSpeed": 11.111, "headwayTime": 2}, "route": ["road_8_18_2", "road_7_18_3", "road_7_17_3", "road_7_16_3", "road_7_15_3", "road_7_14_3", "road_7_13_3", "road_7_12_3", "road_7_11_3", "road_7_10_2", "road_6_10_2", "road_5_10_2", "road_4_10_2", "road_3_10_3", "road_3_9_3", "road_3_8_3", "road_3_7_2", "road_2_7_2", "road_1_7_1", "road_1_8_2"], "interval": 1.0, "startTime": 266, "endTime": 266},
{"vehicle": {"length": 5.0, "width": 2.0, "maxPosAcc": 2.0, "maxNegAcc": 4.5, "usualPosAcc": 2.0, "usualNegAcc": 4.5, "minGap": 2.5, "maxSpeed": 11.111, "headwayTime": 2}, "route": ["road_8_21_2", "road_7_21_2", "road_6_21_2", "road_5_21_2", "road_4_21_2", "road_3_21_2", "road_2_21_2", "road_1_21_1", "road_1_22_1", "road_1_23_1", "road_1_24_1", "road_1_25_1", "road_1_26_1", "road_1_27_1", "road_1_28_1"], "interval": 1.0, "startTime": 266, "endTime": 266},
{"vehicle": {"length": 5.0, "width": 2.0, "maxPosAcc": 2.0, "maxNegAcc": 4.5, "usualPosAcc": 2.0, "usualNegAcc": 4.5, "minGap": 2.5, "maxSpeed": 11.111, "headwayTime": 2}, "route": ["road_8_23_2", "road_7_23_2", "road_6_23_2", "road_5_23_2", "road_4_23_2", "road_3_23_2", "road_2_23_3", "road_2_22_3", "road_2_21_3", "road_2_20_3", "road_2_19_3", "road_2_18_3", "road_2_17_3", "road_2_16_3", "road_2_15_3", "road_2_14_3", "road_2_13_3", "road_2_12_3", "road_2_11_3", "road_2_10_3", "road_2_9_3", "road_2_8_3", "road_2_7_3", "road_2_6_3", "road_2_5_2", "road_1_5_2"], "interval": 1.0, "startTime": 266, "endTime": 266},
{"vehicle": {"length": 5.0, "width": 2.0, "maxPosAcc": 2.0, "maxNegAcc": 4.5, "usualPosAcc": 2.0, "usualNegAcc": 4.5, "minGap": 2.5, "maxSpeed": 11.111, "headwayTime": 2}, "route": ["road_8_24_2", "road_7_24_3", "road_7_23_2", "road_6_23_2", "road_5_23_2", "road_4_23_2", "road_3_23_2", "road_2_23_3", "road_2_22_3", "road_2_21_3", "road_2_20_3", "road_2_19_3", "road_2_18_3", "road_2_17_3", "road_2_16_3", "road_2_15_3", "road_2_14_3", "road_2_13_3", "road_2_12_3", "road_2_11_2", "road_1_11_2"], "interval": 1.0, "startTime": 266, "endTime": 266},
{"vehicle": {"length": 5.0, "width": 2.0, "maxPosAcc": 2.0, "maxNegAcc": 4.5, "usualPosAcc": 2.0, "usualNegAcc": 4.5, "minGap": 2.5, "maxSpeed": 11.111, "headwayTime": 2}, "route": ["road_8_27_2", "road_7_27_2", "road_6_27_2", "road_5_27_2", "road_4_27_2", "road_3_27_2", "road_2_27_2", "road_1_27_1", "road_1_28_0", "road_2_28_1"], "interval": 1.0, "startTime": 266, "endTime": 266},
{"vehicle": {"length": 5.0, "width": 2.0, "maxPosAcc": 2.0, "maxNegAcc": 4.5, "usualPosAcc": 2.0, "usualNegAcc": 4.5, "minGap": 2.5, "maxSpeed": 11.111, "headwayTime": 2}, "route": ["road_1_0_1", "road_1_1_1", "road_1_2_1", "road_1_3_1", "road_1_4_1", "road_1_5_1", "road_1_6_1", "road_1_7_1", "road_1_8_1", "road_1_9_1", "road_1_10_1", "road_1_11_1", "road_1_12_1", "road_1_13_1", "road_1_14_1", "road_1_15_1", "road_1_16_1", "road_1_17_2"], "interval": 1.0, "startTime": 266, "endTime": 266},
{"vehicle": {"length": 5.0, "width": 2.0, "maxPosAcc": 2.0, "maxNegAcc": 4.5, "usualPosAcc": 2.0, "usualNegAcc": 4.5, "minGap": 2.5, "maxSpeed": 11.111, "headwayTime": 2}, "route": ["road_2_0_1", "road_2_1_1", "road_2_2_0", "road_3_2_0", "road_4_2_0", "road_5_2_3", "road_5_1_2", "road_4_1_3"], "interval": 1.0, "startTime": 266, "endTime": 266},
{"vehicle": {"length": 5.0, "width": 2.0, "maxPosAcc": 2.0, "maxNegAcc": 4.5, "usualPosAcc": 2.0, "usualNegAcc": 4.5, "minGap": 2.5, "maxSpeed": 11.111, "headwayTime": 2}, "route": ["road_3_0_1", "road_3_1_2", "road_2_1_1", "road_2_2_1", "road_2_3_1", "road_2_4_1", "road_2_5_1", "road_2_6_1", "road_2_7_1", "road_2_8_1", "road_2_9_1", "road_2_10_1", "road_2_11_1", "road_2_12_1", "road_2_13_1", "road_2_14_1", "road_2_15_1", "road_2_16_1", "road_2_17_1", "road_2_18_1", "road_2_19_1", "road_2_20_1", "road_2_21_1", "road_2_22_1", "road_2_23_1", "road_2_24_1", "road_2_25_1", "road_2_26_1", "road_2_27_1", "road_2_28_0", "road_3_28_1"], "interval": 1.0, "startTime": 266, "endTime": 266},
{"vehicle": {"length": 5.0, "width": 2.0, "maxPosAcc": 2.0, "maxNegAcc": 4.5, "usualPosAcc": 2.0, "usualNegAcc": 4.5, "minGap": 2.5, "maxSpeed": 11.111, "headwayTime": 2}, "route": ["road_4_0_1", "road_4_1_2", "road_3_1_2", "road_2_1_2", "road_1_1_3"], "interval": 1.0, "startTime": 266, "endTime": 266},
{"vehicle": {"length": 5.0, "width": 2.0, "maxPosAcc": 2.0, "maxNegAcc": 4.5, "usualPosAcc": 2.0, "usualNegAcc": 4.5, "minGap": 2.5, "maxSpeed": 11.111, "headwayTime": 2}, "route": ["road_5_0_1", "road_5_1_2", "road_4_1_2", "road_3_1_2", "road_2_1_2", "road_1_1_3"], "interval": 1.0, "startTime": 266, "endTime": 266},
{"vehicle": {"length": 5.0, "width": 2.0, "maxPosAcc": 2.0, "maxNegAcc": 4.5, "usualPosAcc": 2.0, "usualNegAcc": 4.5, "minGap": 2.5, "maxSpeed": 11.111, "headwayTime": 2}, "route": ["road_6_0_1", "road_6_1_2", "road_5_1_2", "road_4_1_2", "road_3_1_2", "road_2_1_2", "road_1_1_1", "road_1_2_2"], "interval": 1.0, "startTime": 266, "endTime": 266},
{"vehicle": {"length": 5.0, "width": 2.0, "maxPosAcc": 2.0, "maxNegAcc": 4.5, "usualPosAcc": 2.0, "usualNegAcc": 4.5, "minGap": 2.5, "maxSpeed": 11.111, "headwayTime": 2}, "route": ["road_0_22_0", "road_1_22_0", "road_2_22_0", "road_3_22_0", "road_4_22_0", "road_5_22_3", "road_5_21_3", "road_5_20_3", "road_5_19_3", "road_5_18_3", "road_5_17_0", "road_6_17_0", "road_7_17_3", "road_7_16_3", "road_7_15_3", "road_7_14_3", "road_7_13_3", "road_7_12_3", "road_7_11_3", "road_7_10_0"], "interval": 1.0, "startTime": 266, "endTime": 266},
{"vehicle": {"length": 5.0, "width": 2.0, "maxPosAcc": 2.0, "maxNegAcc": 4.5, "usualPosAcc": 2.0, "usualNegAcc": 4.5, "minGap": 2.5, "maxSpeed": 11.111, "headwayTime": 2}, "route": ["road_0_10_0", "road_1_10_1", "road_1_11_1", "road_1_12_1", "road_1_13_1", "road_1_14_1", "road_1_15_1", "road_1_16_1", "road_1_17_1", "road_1_18_1", "road_1_19_1", "road_1_20_1", "road_1_21_2"], "interval": 1.0, "startTime": 266, "endTime": 266},
{"vehicle": {"length": 5.0, "width": 2.0, "maxPosAcc": 2.0, "maxNegAcc": 4.5, "usualPosAcc": 2.0, "usualNegAcc": 4.5, "minGap": 2.5, "maxSpeed": 11.111, "headwayTime": 2}, "route": ["road_0_16_0", "road_1_16_0", "road_2_16_0", "road_3_16_0", "road_4_16_0", "road_5_16_0", "road_6_16_0", "road_7_16_3", "road_7_15_3", "road_7_14_3", "road_7_13_3", "road_7_12_3", "road_7_11_0"], "interval": 1.0, "startTime": 266, "endTime": 266},
{"vehicle": {"length": 5.0, "width": 2.0, "maxPosAcc": 2.0, "maxNegAcc": 4.5, "usualPosAcc": 2.0, "usualNegAcc": 4.5, "minGap": 2.5, "maxSpeed": 11.111, "headwayTime": 2}, "route": ["road_0_5_0", "road_1_5_1", "road_1_6_0", "road_2_6_0", "road_3_6_0", "road_4_6_0", "road_5_6_0", "road_6_6_0", "road_7_6_1", "road_7_7_1", "road_7_8_1", "road_7_9_1", "road_7_10_1", "road_7_11_1", "road_7_12_1", "road_7_13_1", "road_7_14_1", "road_7_15_1", "road_7_16_1", "road_7_17_1", "road_7_18_1", "road_7_19_1", "road_7_20_1", "road_7_21_1", "road_7_22_1", "road_7_23_1", "road_7_24_1", "road_7_25_1", "road_7_26_1", "road_7_27_1", "road_7_28_1"], "interval": 1.0, "startTime": 266, "endTime": 266},
{"vehicle": {"length": 5.0, "width": 2.0, "maxPosAcc": 2.0, "maxNegAcc": 4.5, "usualPosAcc": 2.0, "usualNegAcc": 4.5, "minGap": 2.5, "maxSpeed": 11.111, "headwayTime": 2}, "route": ["road_0_18_0", "road_1_18_1", "road_1_19_1", "road_1_20_1", "road_1_21_1", "road_1_22_1", "road_1_23_1", "road_1_24_1", "road_1_25_2"], "interval": 1.0, "startTime": 266, "endTime": 266},
{"vehicle": {"length": 5.0, "width": 2.0, "maxPosAcc": 2.0, "maxNegAcc": 4.5, "usualPosAcc": 2.0, "usualNegAcc": 4.5, "minGap": 2.5, "maxSpeed": 11.111, "headwayTime": 2}, "route": ["road_0_11_0", "road_1_11_1", "road_1_12_0", "road_2_12_3", "road_2_11_3", "road_2_10_3", "road_2_9_3", "road_2_8_3", "road_2_7_3", "road_2_6_3", "road_2_5_3", "road_2_4_3", "road_2_3_3", "road_2_2_3", "road_2_1_2", "road_1_1_3"], "interval": 1.0, "startTime": 266, "endTime": 266},
{"vehicle": {"length": 5.0, "width": 2.0, "maxPosAcc": 2.0, "maxNegAcc": 4.5, "usualPosAcc": 2.0, "usualNegAcc": 4.5, "minGap": 2.5, "maxSpeed": 11.111, "headwayTime": 2}, "route": ["road_0_12_0", "road_1_12_1", "road_1_13_1", "road_1_14_1", "road_1_15_1", "road_1_16_1", "road_1_17_1", "road_1_18_1", "road_1_19_1", "road_1_20_1", "road_1_21_1", "road_1_22_1", "road_1_23_1", "road_1_24_1", "road_1_25_1", "road_1_26_1", "road_1_27_1", "road_1_28_0", "road_2_28_1"], "interval": 1.0, "startTime": 266, "endTime": 266},
{"vehicle": {"length": 5.0, "width": 2.0, "maxPosAcc": 2.0, "maxNegAcc": 4.5, "usualPosAcc": 2.0, "usualNegAcc": 4.5, "minGap": 2.5, "maxSpeed": 11.111, "headwayTime": 2}, "route": ["road_5_29_3", "road_5_28_3", "road_5_27_3", "road_5_26_3", "road_5_25_3", "road_5_24_3", "road_5_23_3", "road_5_22_3", "road_5_21_3", "road_5_20_3", "road_5_19_3", "road_5_18_3", "road_5_17_0", "road_6_17_0", "road_7_17_3", "road_7_16_3", "road_7_15_3", "road_7_14_3", "road_7_13_3", "road_7_12_3", "road_7_11_3", "road_7_10_3", "road_7_9_0"], "interval": 1.0, "startTime": 266, "endTime": 266},
{"vehicle": {"length": 5.0, "width": 2.0, "maxPosAcc": 2.0, "maxNegAcc": 4.5, "usualPosAcc": 2.0, "usualNegAcc": 4.5, "minGap": 2.5, "maxSpeed": 11.111, "headwayTime": 2}, "route": ["road_1_29_3", "road_1_28_0", "road_2_28_3", "road_2_27_3", "road_2_26_3", "road_2_25_3", "road_2_24_3", "road_2_23_3", "road_2_22_3", "road_2_21_2", "road_1_21_1", "road_1_22_2"], "interval": 1.0, "startTime": 266, "endTime": 266},
{"vehicle": {"length": 5.0, "width": 2.0, "maxPosAcc": 2.0, "maxNegAcc": 4.5, "usualPosAcc": 2.0, "usualNegAcc": 4.5, "minGap": 2.5, "maxSpeed": 11.111, "headwayTime": 2}, "route": ["road_2_29_3", "road_2_28_0", "road_3_28_3", "road_3_27_2", "road_2_27_3", "road_2_26_3", "road_2_25_3", "road_2_24_3", "road_2_23_3", "road_2_22_3", "road_2_21_3", "road_2_20_3", "road_2_19_3", "road_2_18_3", "road_2_17_3", "road_2_16_3", "road_2_15_3", "road_2_14_3", "road_2_13_3", "road_2_12_3", "road_2_11_3", "road_2_10_3", "road_2_9_3", "road_2_8_3", "road_2_7_3", "road_2_6_3", "road_2_5_3", "road_2_4_3", "road_2_3_3", "road_2_2_3", "road_2_1_2", "road_1_1_3"], "interval": 1.0, "startTime": 266, "endTime": 266},
{"vehicle": {"length": 5.0, "width": 2.0, "maxPosAcc": 2.0, "maxNegAcc": 4.5, "usualPosAcc": 2.0, "usualNegAcc": 4.5, "minGap": 2.5, "maxSpeed": 11.111, "headwayTime": 2}, "route": ["road_3_29_3", "road_3_28_3", "road_3_27_3", "road_3_26_3", "road_3_25_3", "road_3_24_2", "road_2_24_2", "road_1_24_2"], "interval": 1.0, "startTime": 266, "endTime": 266},
{"vehicle": {"length": 5.0, "width": 2.0, "maxPosAcc": 2.0, "maxNegAcc": 4.5, "usualPosAcc": 2.0, "usualNegAcc": 4.5, "minGap": 2.5, "maxSpeed": 11.111, "headwayTime": 2}, "route": ["road_6_29_3", "road_6_28_0", "road_7_28_3", "road_7_27_2", "road_6_27_2", "road_5_27_3", "road_5_26_3", "road_5_25_2", "road_4_25_2", "road_3_25_2", "road_2_25_3", "road_2_24_3", "road_2_23_3", "road_2_22_3", "road_2_21_3", "road_2_20_3", "road_2_19_3", "road_2_18_3", "road_2_17_3", "road_2_16_3", "road_2_15_3", "road_2_14_3", "road_2_13_3", "road_2_12_3", "road_2_11_3", "road_2_10_3", "road_2_9_3", "road_2_8_3", "road_2_7_3", "road_2_6_3", "road_2_5_3", "road_2_4_3", "road_2_3_3", "road_2_2_3", "road_2_1_2", "road_1_1_3"], "interval": 1.0, "startTime": 266, "endTime": 266},
{"vehicle": {"length": 5.0, "width": 2.0, "maxPosAcc": 2.0, "maxNegAcc": 4.5, "usualPosAcc": 2.0, "usualNegAcc": 4.5, "minGap": 2.5, "maxSpeed": 11.111, "headwayTime": 2}, "route": ["road_0_26_0", "road_1_26_1", "road_1_27_1", "road_1_28_0", "road_2_28_1"], "interval": 1.0, "startTime": 266, "endTime": 266},
{"vehicle": {"length": 5.0, "width": 2.0, "maxPosAcc": 2.0, "maxNegAcc": 4.5, "usualPosAcc": 2.0, "usualNegAcc": 4.5, "minGap": 2.5, "maxSpeed": 11.111, "headwayTime": 2}, "route": ["road_0_17_0", "road_1_17_1", "road_1_18_1", "road_1_19_1", "road_1_20_1", "road_1_21_1", "road_1_22_2"], "interval": 1.0, "startTime": 266, "endTime": 266},
{"vehicle": {"length": 5.0, "width": 2.0, "maxPosAcc": 2.0, "maxNegAcc": 4.5, "usualPosAcc": 2.0, "usualNegAcc": 4.5, "minGap": 2.5, "maxSpeed": 11.111, "headwayTime": 2}, "route": ["road_0_19_0", "road_1_19_1", "road_1_20_0", "road_2_20_0", "road_3_20_0", "road_4_20_0", "road_5_20_0", "road_6_20_0", "road_7_20_1", "road_7_21_1", "road_7_22_1", "road_7_23_1", "road_7_24_1", "road_7_25_1", "road_7_26_1", "road_7_27_0"], "interval": 1.0, "startTime": 266, "endTime": 266},
{"vehicle": {"length": 5.0, "width": 2.0, "maxPosAcc": 2.0, "maxNegAcc": 4.5, "usualPosAcc": 2.0, "usualNegAcc": 4.5, "minGap": 2.5, "maxSpeed": 11.111, "headwayTime": 2}, "route": ["road_0_21_0", "road_1_21_1", "road_1_22_0", "road_2_22_3", "road_2_21_3", "road_2_20_3", "road_2_19_3", "road_2_18_3", "road_2_17_3", "road_2_16_3", "road_2_15_3", "road_2_14_3", "road_2_13_3", "road_2_12_3", "road_2_11_3", "road_2_10_3", "road_2_9_3", "road_2_8_3", "road_2_7_3", "road_2_6_3", "road_2_5_3", "road_2_4_3", "road_2_3_3", "road_2_2_0", "road_3_2_0", "road_4_2_0", "road_5_2_3", "road_5_1_3"], "interval": 1.0, "startTime": 266, "endTime": 266},
{"vehicle": {"length": 5.0, "width": 2.0, "maxPosAcc": 2.0, "maxNegAcc": 4.5, "usualPosAcc": 2.0, "usualNegAcc": 4.5, "minGap": 2.5, "maxSpeed": 11.111, "headwayTime": 2}, "route": ["road_0_23_0", "road_1_23_1", "road_1_24_0", "road_2_24_0", "road_3_24_0", "road_4_24_0", "road_5_24_0", "road_6_24_0", "road_7_24_3", "road_7_23_3", "road_7_22_3", "road_7_21_3", "road_7_20_3", "road_7_19_0"], "interval": 1.0, "startTime": 266, "endTime": 266},
{"vehicle": {"length": 5.0, "width": 2.0, "maxPosAcc": 2.0, "maxNegAcc": 4.5, "usualPosAcc": 2.0, "usualNegAcc": 4.5, "minGap": 2.5, "maxSpeed": 11.111, "headwayTime": 2}, "route": ["road_2_0_1", "road_2_1_2", "road_1_1_3"], "interval": 1.0, "startTime": 266, "endTime": 266},
{"vehicle": {"length": 5.0, "width": 2.0, "maxPosAcc": 2.0, "maxNegAcc": 4.5, "usualPosAcc": 2.0, "usualNegAcc": 4.5, "minGap": 2.5, "maxSpeed": 11.111, "headwayTime": 2}, "route": ["road_2_29_3", "road_2_28_3", "road_2_27_3", "road_2_26_3", "road_2_25_3", "road_2_24_3", "road_2_23_3", "road_2_22_3", "road_2_21_3", "road_2_20_3", "road_2_19_3", "road_2_18_3", "road_2_17_3", "road_2_16_3", "road_2_15_3", "road_2_14_3", "road_2_13_3", "road_2_12_3", "road_2_11_3", "road_2_10_3", "road_2_9_3", "road_2_8_3", "road_2_7_3", "road_2_6_3", "road_2_5_3", "road_2_4_3", "road_2_3_3", "road_2_2_3", "road_2_1_2", "road_1_1_3"], "interval": 1.0, "startTime": 266, "endTime": 266},
{"vehicle": {"length": 5.0, "width": 2.0, "maxPosAcc": 2.0, "maxNegAcc": 4.5, "usualPosAcc": 2.0, "usualNegAcc": 4.5, "minGap": 2.5, "maxSpeed": 11.111, "headwayTime": 2}, "route": ["road_8_23_2", "road_7_23_3", "road_7_22_3", "road_7_21_3", "road_7_20_3", "road_7_19_3", "road_7_18_3", "road_7_17_3", "road_7_16_3", "road_7_15_3", "road_7_14_3", "road_7_13_3", "road_7_12_3", "road_7_11_3", "road_7_10_2", "road_6_10_2", "road_5_10_3", "road_5_9_3", "road_5_8_3", "road_5_7_3", "road_5_6_3", "road_5_5_3", "road_5_4_3", "road_5_3_3", "road_5_2_3", "road_5_1_2", "road_4_1_3"], "interval": 1.0, "startTime": 267, "endTime": 267},
{"vehicle": {"length": 5.0, "width": 2.0, "maxPosAcc": 2.0, "maxNegAcc": 4.5, "usualPosAcc": 2.0, "usualNegAcc": 4.5, "minGap": 2.5, "maxSpeed": 11.111, "headwayTime": 2}, "route": ["road_2_0_1", "road_2_1_2", "road_1_1_3"], "interval": 1.0, "startTime": 267, "endTime": 267},
{"vehicle": {"length": 5.0, "width": 2.0, "maxPosAcc": 2.0, "maxNegAcc": 4.5, "usualPosAcc": 2.0, "usualNegAcc": 4.5, "minGap": 2.5, "maxSpeed": 11.111, "headwayTime": 2}, "route": ["road_3_0_1", "road_3_1_2", "road_2_1_3"], "interval": 1.0, "startTime": 267, "endTime": 267},
{"vehicle": {"length": 5.0, "width": 2.0, "maxPosAcc": 2.0, "maxNegAcc": 4.5, "usualPosAcc": 2.0, "usualNegAcc": 4.5, "minGap": 2.5, "maxSpeed": 11.111, "headwayTime": 2}, "route": ["road_4_0_1", "road_4_1_2", "road_3_1_2", "road_2_1_2", "road_1_1_1", "road_1_2_1", "road_1_3_1", "road_1_4_1", "road_1_5_1", "road_1_6_1", "road_1_7_1", "road_1_8_1", "road_1_9_1", "road_1_10_1", "road_1_11_1", "road_1_12_1", "road_1_13_1", "road_1_14_1", "road_1_15_1", "road_1_16_1", "road_1_17_1", "road_1_18_1", "road_1_19_1", "road_1_20_1", "road_1_21_1", "road_1_22_1", "road_1_23_1", "road_1_24_1", "road_1_25_1", "road_1_26_1", "road_1_27_1", "road_1_28_1"], "interval": 1.0, "startTime": 267, "endTime": 267},
{"vehicle": {"length": 5.0, "width": 2.0, "maxPosAcc": 2.0, "maxNegAcc": 4.5, "usualPosAcc": 2.0, "usualNegAcc": 4.5, "minGap": 2.5, "maxSpeed": 11.111, "headwayTime": 2}, "route": ["road_0_3_0", "road_1_3_0", "road_2_3_3", "road_2_2_0", "road_3_2_0", "road_4_2_0", "road_5_2_3", "road_5_1_2", "road_4_1_3"], "interval": 1.0, "startTime": 267, "endTime": 267},
{"vehicle": {"length": 5.0, "width": 2.0, "maxPosAcc": 2.0, "maxNegAcc": 4.5, "usualPosAcc": 2.0, "usualNegAcc": 4.5, "minGap": 2.5, "maxSpeed": 11.111, "headwayTime": 2}, "route": ["road_0_10_0", "road_1_10_0", "road_2_10_3", "road_2_9_3", "road_2_8_3", "road_2_7_3", "road_2_6_3", "road_2_5_3", "road_2_4_3", "road_2_3_3", "road_2_2_3", "road_2_1_2", "road_1_1_3"], "interval": 1.0, "startTime": 268, "endTime": 268},
{"vehicle": {"length": 5.0, "width": 2.0, "maxPosAcc": 2.0, "maxNegAcc": 4.5, "usualPosAcc": 2.0, "usualNegAcc": 4.5, "minGap": 2.5, "maxSpeed": 11.111, "headwayTime": 2}, "route": ["road_1_29_3", "road_1_28_0", "road_2_28_3", "road_2_27_3", "road_2_26_3", "road_2_25_3", "road_2_24_3", "road_2_23_3", "road_2_22_3", "road_2_21_2", "road_1_21_2"], "interval": 1.0, "startTime": 268, "endTime": 268},
{"vehicle": {"length": 5.0, "width": 2.0, "maxPosAcc": 2.0, "maxNegAcc": 4.5, "usualPosAcc": 2.0, "usualNegAcc": 4.5, "minGap": 2.5, "maxSpeed": 11.111, "headwayTime": 2}, "route": ["road_4_29_3", "road_4_28_0", "road_5_28_3", "road_5_27_3", "road_5_26_3", "road_5_25_3", "road_5_24_3", "road_5_23_3", "road_5_22_3", "road_5_21_3", "road_5_20_3", "road_5_19_3", "road_5_18_3", "road_5_17_0", "road_6_17_0", "road_7_17_3", "road_7_16_3", "road_7_15_3", "road_7_14_3", "road_7_13_3", "road_7_12_3", "road_7_11_0"], "interval": 1.0, "startTime": 268, "endTime": 268},
{"vehicle": {"length": 5.0, "width": 2.0, "maxPosAcc": 2.0, "maxNegAcc": 4.5, "usualPosAcc": 2.0, "usualNegAcc": 4.5, "minGap": 2.5, "maxSpeed": 11.111, "headwayTime": 2}, "route": ["road_1_0_1", "road_1_1_1", "road_1_2_0", "road_2_2_0", "road_3_2_3", "road_3_1_2", "road_2_1_3"], "interval": 1.0, "startTime": 269, "endTime": 269},
{"vehicle": {"length": 5.0, "width": 2.0, "maxPosAcc": 2.0, "maxNegAcc": 4.5, "usualPosAcc": 2.0, "usualNegAcc": 4.5, "minGap": 2.5, "maxSpeed": 11.111, "headwayTime": 2}, "route": ["road_3_29_3", "road_3_28_3", "road_3_27_2", "road_2_27_3", "road_2_26_3", "road_2_25_3", "road_2_24_3", "road_2_23_3", "road_2_22_3", "road_2_21_3", "road_2_20_3", "road_2_19_3", "road_2_18_3", "road_2_17_3", "road_2_16_3", "road_2_15_3", "road_2_14_3", "road_2_13_3", "road_2_12_3", "road_2_11_3", "road_2_10_3", "road_2_9_3", "road_2_8_3", "road_2_7_3", "road_2_6_3", "road_2_5_3", "road_2_4_3", "road_2_3_3", "road_2_2_3", "road_2_1_2", "road_1_1_3"], "interval": 1.0, "startTime": 269, "endTime": 269},
{"vehicle": {"length": 5.0, "width": 2.0, "maxPosAcc": 2.0, "maxNegAcc": 4.5, "usualPosAcc": 2.0, "usualNegAcc": 4.5, "minGap": 2.5, "maxSpeed": 11.111, "headwayTime": 2}, "route": ["road_2_29_3", "road_2_28_3", "road_2_27_3", "road_2_26_3", "road_2_25_3", "road_2_24_3", "road_2_23_3", "road_2_22_3", "road_2_21_3", "road_2_20_3", "road_2_19_3", "road_2_18_3", "road_2_17_3", "road_2_16_3", "road_2_15_3", "road_2_14_3", "road_2_13_3", "road_2_12_3", "road_2_11_3", "road_2_10_3", "road_2_9_3", "road_2_8_3", "road_2_7_3", "road_2_6_3", "road_2_5_3", "road_2_4_3", "road_2_3_3", "road_2_2_3", "road_2_1_2", "road_1_1_3"], "interval": 1.0, "startTime": 269, "endTime": 269},
{"vehicle": {"length": 5.0, "width": 2.0, "maxPosAcc": 2.0, "maxNegAcc": 4.5, "usualPosAcc": 2.0, "usualNegAcc": 4.5, "minGap": 2.5, "maxSpeed": 11.111, "headwayTime": 2}, "route": ["road_0_6_0", "road_1_6_0", "road_2_6_3", "road_2_5_3", "road_2_4_3", "road_2_3_3", "road_2_2_3", "road_2_1_2", "road_1_1_3"], "interval": 1.0, "startTime": 270, "endTime": 270},
{"vehicle": {"length": 5.0, "width": 2.0, "maxPosAcc": 2.0, "maxNegAcc": 4.5, "usualPosAcc": 2.0, "usualNegAcc": 4.5, "minGap": 2.5, "maxSpeed": 11.111, "headwayTime": 2}, "route": ["road_0_19_0", "road_1_19_1", "road_1_20_0", "road_2_20_3", "road_2_19_3", "road_2_18_3", "road_2_17_3", "road_2_16_3", "road_2_15_3", "road_2_14_3", "road_2_13_3", "road_2_12_3", "road_2_11_3", "road_2_10_3", "road_2_9_3", "road_2_8_3", "road_2_7_3", "road_2_6_3", "road_2_5_3", "road_2_4_2", "road_1_4_2"], "interval": 1.0, "startTime": 270, "endTime": 270},
{"vehicle": {"length": 5.0, "width": 2.0, "maxPosAcc": 2.0, "maxNegAcc": 4.5, "usualPosAcc": 2.0, "usualNegAcc": 4.5, "minGap": 2.5, "maxSpeed": 11.111, "headwayTime": 2}, "route": ["road_0_25_0", "road_1_25_1", "road_1_26_0", "road_2_26_0", "road_3_26_0", "road_4_26_0", "road_5_26_3", "road_5_25_3", "road_5_24_3", "road_5_23_3", "road_5_22_3", "road_5_21_3", "road_5_20_3", "road_5_19_3", "road_5_18_3", "road_5_17_0", "road_6_17_0", "road_7_17_3", "road_7_16_3", "road_7_15_3", "road_7_14_3", "road_7_13_3", "road_7_12_3", "road_7_11_3", "road_7_10_3", "road_7_9_3", "road_7_8_0"], "interval": 1.0, "startTime": 270, "endTime": 270},
{"vehicle": {"length": 5.0, "width": 2.0, "maxPosAcc": 2.0, "maxNegAcc": 4.5, "usualPosAcc": 2.0, "usualNegAcc": 4.5, "minGap": 2.5, "maxSpeed": 11.111, "headwayTime": 2}, "route": ["road_2_29_3", "road_2_28_3", "road_2_27_3", "road_2_26_3", "road_2_25_3", "road_2_24_3", "road_2_23_3", "road_2_22_3", "road_2_21_3", "road_2_20_3", "road_2_19_3", "road_2_18_3", "road_2_17_2", "road_1_17_2"], "interval": 1.0, "startTime": 270, "endTime": 270},
{"vehicle": {"length": 5.0, "width": 2.0, "maxPosAcc": 2.0, "maxNegAcc": 4.5, "usualPosAcc": 2.0, "usualNegAcc": 4.5, "minGap": 2.5, "maxSpeed": 11.111, "headwayTime": 2}, "route": ["road_0_8_0", "road_1_8_1", "road_1_9_1", "road_1_10_1", "road_1_11_1", "road_1_12_1", "road_1_13_1", "road_1_14_1", "road_1_15_1", "road_1_16_1", "road_1_17_1", "road_1_18_1", "road_1_19_1", "road_1_20_2"], "interval": 1.0, "startTime": 271, "endTime": 271},
{"vehicle": {"length": 5.0, "width": 2.0, "maxPosAcc": 2.0, "maxNegAcc": 4.5, "usualPosAcc": 2.0, "usualNegAcc": 4.5, "minGap": 2.5, "maxSpeed": 11.111, "headwayTime": 2}, "route": ["road_1_0_1", "road_1_1_1", "road_1_2_0", "road_2_2_0", "road_3_2_0", "road_4_2_0", "road_5_2_0", "road_6_2_0", "road_7_2_3", "road_7_1_3"], "interval": 1.0, "startTime": 271, "endTime": 271},
{"vehicle": {"length": 5.0, "width": 2.0, "maxPosAcc": 2.0, "maxNegAcc": 4.5, "usualPosAcc": 2.0, "usualNegAcc": 4.5, "minGap": 2.5, "maxSpeed": 11.111, "headwayTime": 2}, "route": ["road_0_9_0", "road_1_9_1", "road_1_10_1", "road_1_11_1", "road_1_12_1", "road_1_13_1", "road_1_14_1", "road_1_15_1", "road_1_16_1", "road_1_17_1", "road_1_18_1", "road_1_19_1", "road_1_20_1", "road_1_21_1", "road_1_22_2"], "interval": 1.0, "startTime": 271, "endTime": 271},
{"vehicle": {"length": 5.0, "width": 2.0, "maxPosAcc": 2.0, "maxNegAcc": 4.5, "usualPosAcc": 2.0, "usualNegAcc": 4.5, "minGap": 2.5, "maxSpeed": 11.111, "headwayTime": 2}, "route": ["road_8_19_2", "road_7_19_3", "road_7_18_3", "road_7_17_3", "road_7_16_3", "road_7_15_3", "road_7_14_3", "road_7_13_3", "road_7_12_3", "road_7_11_3", "road_7_10_3", "road_7_9_3", "road_7_8_0"], "interval": 1.0, "startTime": 272, "endTime": 272},
{"vehicle": {"length": 5.0, "width": 2.0, "maxPosAcc": 2.0, "maxNegAcc": 4.5, "usualPosAcc": 2.0, "usualNegAcc": 4.5, "minGap": 2.5, "maxSpeed": 11.111, "headwayTime": 2}, "route": ["road_3_0_1", "road_3_1_2", "road_2_1_2", "road_1_1_1", "road_1_2_1", "road_1_3_1", "road_1_4_1", "road_1_5_1", "road_1_6_1", "road_1_7_1", "road_1_8_1", "road_1_9_1", "road_1_10_1", "road_1_11_1", "road_1_12_1", "road_1_13_1", "road_1_14_1", "road_1_15_1", "road_1_16_1", "road_1_17_1", "road_1_18_1", "road_1_19_1", "road_1_20_1", "road_1_21_1", "road_1_22_1", "road_1_23_1", "road_1_24_2"], "interval": 1.0, "startTime": 272, "endTime": 272},
{"vehicle": {"length": 5.0, "width": 2.0, "maxPosAcc": 2.0, "maxNegAcc": 4.5, "usualPosAcc": 2.0, "usualNegAcc": 4.5, "minGap": 2.5, "maxSpeed": 11.111, "headwayTime": 2}, "route": ["road_4_29_3", "road_4_28_0", "road_5_28_3", "road_5_27_3", "road_5_26_3", "road_5_25_3", "road_5_24_3", "road_5_23_3", "road_5_22_3", "road_5_21_3", "road_5_20_3", "road_5_19_3", "road_5_18_3", "road_5_17_3", "road_5_16_3", "road_5_15_3", "road_5_14_3", "road_5_13_3", "road_5_12_3", "road_5_11_3", "road_5_10_3", "road_5_9_3", "road_5_8_3", "road_5_7_3", "road_5_6_3", "road_5_5_3", "road_5_4_3", "road_5_3_3", "road_5_2_3", "road_5_1_3"], "interval": 1.0, "startTime": 272, "endTime": 272},
{"vehicle": {"length": 5.0, "width": 2.0, "maxPosAcc": 2.0, "maxNegAcc": 4.5, "usualPosAcc": 2.0, "usualNegAcc": 4.5, "minGap": 2.5, "maxSpeed": 11.111, "headwayTime": 2}, "route": ["road_8_20_2", "road_7_20_1", "road_7_21_2", "road_6_21_1", "road_6_22_1", "road_6_23_2", "road_5_23_2", "road_4_23_2", "road_3_23_2", "road_2_23_2", "road_1_23_1", "road_1_24_2"], "interval": 1.0, "startTime": 273, "endTime": 273},
{"vehicle": {"length": 5.0, "width": 2.0, "maxPosAcc": 2.0, "maxNegAcc": 4.5, "usualPosAcc": 2.0, "usualNegAcc": 4.5, "minGap": 2.5, "maxSpeed": 11.111, "headwayTime": 2}, "route": ["road_0_22_0", "road_1_22_0", "road_2_22_3", "road_2_21_3", "road_2_20_3", "road_2_19_3", "road_2_18_3", "road_2_17_3", "road_2_16_3", "road_2_15_3", "road_2_14_3", "road_2_13_3", "road_2_12_3", "road_2_11_3", "road_2_10_3", "road_2_9_3", "road_2_8_3", "road_2_7_3", "road_2_6_3", "road_2_5_3", "road_2_4_2", "road_1_4_2"], "interval": 1.0, "startTime": 273, "endTime": 273},
{"vehicle": {"length": 5.0, "width": 2.0, "maxPosAcc": 2.0, "maxNegAcc": 4.5, "usualPosAcc": 2.0, "usualNegAcc": 4.5, "minGap": 2.5, "maxSpeed": 11.111, "headwayTime": 2}, "route": ["road_0_17_0", "road_1_17_0", "road_2_17_3", "road_2_16_3", "road_2_15_3", "road_2_14_3", "road_2_13_3", "road_2_12_3", "road_2_11_3", "road_2_10_3", "road_2_9_3", "road_2_8_3", "road_2_7_3", "road_2_6_3", "road_2_5_3", "road_2_4_3", "road_2_3_3", "road_2_2_3", "road_2_1_2", "road_1_1_3"], "interval": 1.0, "startTime": 273, "endTime": 273},
{"vehicle": {"length": 5.0, "width": 2.0, "maxPosAcc": 2.0, "maxNegAcc": 4.5, "usualPosAcc": 2.0, "usualNegAcc": 4.5, "minGap": 2.5, "maxSpeed": 11.111, "headwayTime": 2}, "route": ["road_8_24_2", "road_7_24_3", "road_7_23_2", "road_6_23_2", "road_5_23_2", "road_4_23_2", "road_3_23_2", "road_2_23_3", "road_2_22_3", "road_2_21_3", "road_2_20_3", "road_2_19_3", "road_2_18_3", "road_2_17_3", "road_2_16_3", "road_2_15_3", "road_2_14_3", "road_2_13_2", "road_1_13_2"], "interval": 1.0, "startTime": 274, "endTime": 274},
{"vehicle": {"length": 5.0, "width": 2.0, "maxPosAcc": 2.0, "maxNegAcc": 4.5, "usualPosAcc": 2.0, "usualNegAcc": 4.5, "minGap": 2.5, "maxSpeed": 11.111, "headwayTime": 2}, "route": ["road_8_10_2", "road_7_10_2", "road_6_10_1", "road_6_11_2", "road_5_11_2", "road_4_11_1", "road_4_12_1", "road_4_13_2", "road_3_13_2", "road_2_13_2", "road_1_13_1", "road_1_14_1", "road_1_15_1", "road_1_16_1", "road_1_17_1", "road_1_18_1", "road_1_19_1", "road_1_20_1", "road_1_21_2"], "interval": 1.0, "startTime": 275, "endTime": 275},
{"vehicle": {"length": 5.0, "width": 2.0, "maxPosAcc": 2.0, "maxNegAcc": 4.5, "usualPosAcc": 2.0, "usualNegAcc": 4.5, "minGap": 2.5, "maxSpeed": 11.111, "headwayTime": 2}, "route": ["road_8_12_2", "road_7_12_3", "road_7_11_3", "road_7_10_3", "road_7_9_3", "road_7_8_3", "road_7_7_3", "road_7_6_3", "road_7_5_3", "road_7_4_3", "road_7_3_3", "road_7_2_3", "road_7_1_2", "road_6_1_3"], "interval": 1.0, "startTime": 275, "endTime": 275},
{"vehicle": {"length": 5.0, "width": 2.0, "maxPosAcc": 2.0, "maxNegAcc": 4.5, "usualPosAcc": 2.0, "usualNegAcc": 4.5, "minGap": 2.5, "maxSpeed": 11.111, "headwayTime": 2}, "route": ["road_2_0_1", "road_2_1_2", "road_1_1_1", "road_1_2_1", "road_1_3_1", "road_1_4_1", "road_1_5_1", "road_1_6_1", "road_1_7_1", "road_1_8_1", "road_1_9_1", "road_1_10_1", "road_1_11_1", "road_1_12_1", "road_1_13_1", "road_1_14_1", "road_1_15_1", "road_1_16_1", "road_1_17_1", "road_1_18_1", "road_1_19_1", "road_1_20_1", "road_1_21_2"], "interval": 1.0, "startTime": 275, "endTime": 275},
{"vehicle": {"length": 5.0, "width": 2.0, "maxPosAcc": 2.0, "maxNegAcc": 4.5, "usualPosAcc": 2.0, "usualNegAcc": 4.5, "minGap": 2.5, "maxSpeed": 11.111, "headwayTime": 2}, "route": ["road_8_18_2", "road_7_18_1", "road_7_19_1", "road_7_20_1", "road_7_21_1", "road_7_22_1", "road_7_23_1", "road_7_24_1", "road_7_25_1", "road_7_26_1", "road_7_27_2", "road_6_27_2", "road_5_27_2", "road_4_27_2", "road_3_27_2", "road_2_27_1", "road_2_28_0", "road_3_28_1"], "interval": 1.0, "startTime": 276, "endTime": 276},
{"vehicle": {"length": 5.0, "width": 2.0, "maxPosAcc": 2.0, "maxNegAcc": 4.5, "usualPosAcc": 2.0, "usualNegAcc": 4.5, "minGap": 2.5, "maxSpeed": 11.111, "headwayTime": 2}, "route": ["road_1_0_1", "road_1_1_1", "road_1_2_0", "road_2_2_0", "road_3_2_0", "road_4_2_0", "road_5_2_3", "road_5_1_2", "road_4_1_3"], "interval": 1.0, "startTime": 276, "endTime": 276},
{"vehicle": {"length": 5.0, "width": 2.0, "maxPosAcc": 2.0, "maxNegAcc": 4.5, "usualPosAcc": 2.0, "usualNegAcc": 4.5, "minGap": 2.5, "maxSpeed": 11.111, "headwayTime": 2}, "route": ["road_0_5_0", "road_1_5_1", "road_1_6_0", "road_2_6_3", "road_2_5_3", "road_2_4_3", "road_2_3_3", "road_2_2_3", "road_2_1_2", "road_1_1_3"], "interval": 1.0, "startTime": 276, "endTime": 276},
{"vehicle": {"length": 5.0, "width": 2.0, "maxPosAcc": 2.0, "maxNegAcc": 4.5, "usualPosAcc": 2.0, "usualNegAcc": 4.5, "minGap": 2.5, "maxSpeed": 11.111, "headwayTime": 2}, "route": ["road_0_6_0", "road_1_6_1", "road_1_7_1", "road_1_8_1", "road_1_9_1", "road_1_10_1", "road_1_11_1", "road_1_12_1", "road_1_13_1", "road_1_14_1", "road_1_15_1", "road_1_16_1", "road_1_17_2"], "interval": 1.0, "startTime": 277, "endTime": 277},
{"vehicle": {"length": 5.0, "width": 2.0, "maxPosAcc": 2.0, "maxNegAcc": 4.5, "usualPosAcc": 2.0, "usualNegAcc": 4.5, "minGap": 2.5, "maxSpeed": 11.111, "headwayTime": 2}, "route": ["road_0_16_0", "road_1_16_0", "road_2_16_3", "road_2_15_3", "road_2_14_3", "road_2_13_3", "road_2_12_3", "road_2_11_2", "road_1_11_1", "road_1_12_2"], "interval": 1.0, "startTime": 277, "endTime": 277},
{"vehicle": {"length": 5.0, "width": 2.0, "maxPosAcc": 2.0, "maxNegAcc": 4.5, "usualPosAcc": 2.0, "usualNegAcc": 4.5, "minGap": 2.5, "maxSpeed": 11.111, "headwayTime": 2}, "route": ["road_0_21_0", "road_1_21_1", "road_1_22_1", "road_1_23_1", "road_1_24_1", "road_1_25_1", "road_1_26_1", "road_1_27_1", "road_1_28_1"], "interval": 1.0, "startTime": 277, "endTime": 277},
{"vehicle": {"length": 5.0, "width": 2.0, "maxPosAcc": 2.0, "maxNegAcc": 4.5, "usualPosAcc": 2.0, "usualNegAcc": 4.5, "minGap": 2.5, "maxSpeed": 11.111, "headwayTime": 2}, "route": ["road_2_0_1", "road_2_1_2", "road_1_1_1", "road_1_2_0", "road_2_2_1", "road_2_3_1", "road_2_4_1", "road_2_5_1", "road_2_6_1", "road_2_7_1", "road_2_8_1", "road_2_9_1", "road_2_10_1", "road_2_11_1", "road_2_12_1", "road_2_13_1", "road_2_14_1", "road_2_15_1", "road_2_16_1", "road_2_17_1", "road_2_18_1", "road_2_19_1", "road_2_20_1", "road_2_21_1", "road_2_22_1", "road_2_23_1", "road_2_24_1", "road_2_25_1", "road_2_26_1", "road_2_27_1", "road_2_28_1"], "interval": 1.0, "startTime": 277, "endTime": 277},
{"vehicle": {"length": 5.0, "width": 2.0, "maxPosAcc": 2.0, "maxNegAcc": 4.5, "usualPosAcc": 2.0, "usualNegAcc": 4.5, "minGap": 2.5, "maxSpeed": 11.111, "headwayTime": 2}, "route": ["road_4_0_1", "road_4_1_1", "road_4_2_0", "road_5_2_0", "road_6_2_0", "road_7_2_1", "road_7_3_1", "road_7_4_1", "road_7_5_1", "road_7_6_1", "road_7_7_1", "road_7_8_1", "road_7_9_1", "road_7_10_1", "road_7_11_1", "road_7_12_1", "road_7_13_1", "road_7_14_1", "road_7_15_1", "road_7_16_1", "road_7_17_1", "road_7_18_1", "road_7_19_1", "road_7_20_1", "road_7_21_1", "road_7_22_1", "road_7_23_1", "road_7_24_0"], "interval": 1.0, "startTime": 278, "endTime": 278},
{"vehicle": {"length": 5.0, "width": 2.0, "maxPosAcc": 2.0, "maxNegAcc": 4.5, "usualPosAcc": 2.0, "usualNegAcc": 4.5, "minGap": 2.5, "maxSpeed": 11.111, "headwayTime": 2}, "route": ["road_1_0_1", "road_1_1_1", "road_1_2_1", "road_1_3_1", "road_1_4_1", "road_1_5_1", "road_1_6_2"], "interval": 1.0, "startTime": 279, "endTime": 279},
{"vehicle": {"length": 5.0, "width": 2.0, "maxPosAcc": 2.0, "maxNegAcc": 4.5, "usualPosAcc": 2.0, "usualNegAcc": 4.5, "minGap": 2.5, "maxSpeed": 11.111, "headwayTime": 2}, "route": ["road_0_24_0", "road_1_24_0", "road_2_24_3", "road_2_23_3", "road_2_22_3", "road_2_21_3", "road_2_20_3", "road_2_19_3", "road_2_18_3", "road_2_17_3", "road_2_16_3", "road_2_15_3", "road_2_14_3", "road_2_13_3", "road_2_12_3", "road_2_11_3", "road_2_10_3", "road_2_9_3", "road_2_8_3", "road_2_7_3", "road_2_6_3", "road_2_5_3", "road_2_4_3", "road_2_3_3", "road_2_2_0", "road_3_2_0", "road_4_2_0", "road_5_2_3", "road_5_1_2", "road_4_1_3"], "interval": 1.0, "startTime": 280, "endTime": 280},
{"vehicle": {"length": 5.0, "width": 2.0, "maxPosAcc": 2.0, "maxNegAcc": 4.5, "usualPosAcc": 2.0, "usualNegAcc": 4.5, "minGap": 2.5, "maxSpeed": 11.111, "headwayTime": 2}, "route": ["road_1_0_1", "road_1_1_1", "road_1_2_1", "road_1_3_1", "road_1_4_1", "road_1_5_1", "road_1_6_1", "road_1_7_1", "road_1_8_1", "road_1_9_1", "road_1_10_1", "road_1_11_1", "road_1_12_1", "road_1_13_1", "road_1_14_2"], "interval": 1.0, "startTime": 281, "endTime": 281},
{"vehicle": {"length": 5.0, "width": 2.0, "maxPosAcc": 2.0, "maxNegAcc": 4.5, "usualPosAcc": 2.0, "usualNegAcc": 4.5, "minGap": 2.5, "maxSpeed": 11.111, "headwayTime": 2}, "route": ["road_4_29_3", "road_4_28_0", "road_5_28_3", "road_5_27_3", "road_5_26_3", "road_5_25_3", "road_5_24_3", "road_5_23_3", "road_5_22_3", "road_5_21_3", "road_5_20_3", "road_5_19_3", "road_5_18_3", "road_5_17_0", "road_6_17_0", "road_7_17_3", "road_7_16_3", "road_7_15_3", "road_7_14_3", "road_7_13_3", "road_7_12_3", "road_7_11_0"], "interval": 1.0, "startTime": 281, "endTime": 281},
{"vehicle": {"length": 5.0, "width": 2.0, "maxPosAcc": 2.0, "maxNegAcc": 4.5, "usualPosAcc": 2.0, "usualNegAcc": 4.5, "minGap": 2.5, "maxSpeed": 11.111, "headwayTime": 2}, "route": ["road_2_0_1", "road_2_1_2", "road_1_1_1", "road_1_2_1", "road_1_3_1", "road_1_4_1", "road_1_5_1", "road_1_6_1", "road_1_7_1", "road_1_8_1", "road_1_9_1", "road_1_10_1", "road_1_11_1", "road_1_12_1", "road_1_13_1", "road_1_14_1", "road_1_15_1", "road_1_16_1", "road_1_17_1", "road_1_18_1", "road_1_19_1", "road_1_20_1", "road_1_21_1", "road_1_22_1", "road_1_23_1", "road_1_24_1", "road_1_25_1", "road_1_26_1", "road_1_27_1", "road_1_28_0", "road_2_28_1"], "interval": 1.0, "startTime": 281, "endTime": 281},
{"vehicle": {"length": 5.0, "width": 2.0, "maxPosAcc": 2.0, "maxNegAcc": 4.5, "usualPosAcc": 2.0, "usualNegAcc": 4.5, "minGap": 2.5, "maxSpeed": 11.111, "headwayTime": 2}, "route": ["road_6_0_1", "road_6_1_1", "road_6_2_0", "road_7_2_1", "road_7_3_1", "road_7_4_1", "road_7_5_1", "road_7_6_1", "road_7_7_1", "road_7_8_1", "road_7_9_1", "road_7_10_1", "road_7_11_1", "road_7_12_1", "road_7_13_1", "road_7_14_1", "road_7_15_1", "road_7_16_1", "road_7_17_1", "road_7_18_1", "road_7_19_1", "road_7_20_1", "road_7_21_1", "road_7_22_1", "road_7_23_1", "road_7_24_1", "road_7_25_1", "road_7_26_1", "road_7_27_1", "road_7_28_1"], "interval": 1.0, "startTime": 282, "endTime": 282},
{"vehicle": {"length": 5.0, "width": 2.0, "maxPosAcc": 2.0, "maxNegAcc": 4.5, "usualPosAcc": 2.0, "usualNegAcc": 4.5, "minGap": 2.5, "maxSpeed": 11.111, "headwayTime": 2}, "route": ["road_1_29_3", "road_1_28_0", "road_2_28_3", "road_2_27_3", "road_2_26_3", "road_2_25_3", "road_2_24_3", "road_2_23_3", "road_2_22_3", "road_2_21_3", "road_2_20_3", "road_2_19_3", "road_2_18_3", "road_2_17_3", "road_2_16_3", "road_2_15_3", "road_2_14_3", "road_2_13_3", "road_2_12_3", "road_2_11_3", "road_2_10_3", "road_2_9_3", "road_2_8_3", "road_2_7_2", "road_1_7_2"], "interval": 1.0, "startTime": 282, "endTime": 282},
{"vehicle": {"length": 5.0, "width": 2.0, "maxPosAcc": 2.0, "maxNegAcc": 4.5, "usualPosAcc": 2.0, "usualNegAcc": 4.5, "minGap": 2.5, "maxSpeed": 11.111, "headwayTime": 2}, "route": ["road_8_15_2", "road_7_15_3", "road_7_14_3", "road_7_13_3", "road_7_12_3", "road_7_11_3", "road_7_10_2", "road_6_10_2", "road_5_10_2", "road_4_10_2", "road_3_10_3", "road_3_9_3", "road_3_8_3", "road_3_7_3", "road_3_6_3", "road_3_5_3", "road_3_4_3", "road_3_3_3", "road_3_2_3", "road_3_1_2", "road_2_1_2", "road_1_1_1", "road_1_2_2"], "interval": 1.0, "startTime": 283, "endTime": 283},
{"vehicle": {"length": 5.0, "width": 2.0, "maxPosAcc": 2.0, "maxNegAcc": 4.5, "usualPosAcc": 2.0, "usualNegAcc": 4.5, "minGap": 2.5, "maxSpeed": 11.111, "headwayTime": 2}, "route": ["road_8_24_2", "road_7_24_3", "road_7_23_3", "road_7_22_3", "road_7_21_3", "road_7_20_0"], "interval": 1.0, "startTime": 283, "endTime": 283},
{"vehicle": {"length": 5.0, "width": 2.0, "maxPosAcc": 2.0, "maxNegAcc": 4.5, "usualPosAcc": 2.0, "usualNegAcc": 4.5, "minGap": 2.5, "maxSpeed": 11.111, "headwayTime": 2}, "route": ["road_1_0_1", "road_1_1_1", "road_1_2_0", "road_2_2_3", "road_2_1_3"], "interval": 1.0, "startTime": 283, "endTime": 283},
{"vehicle": {"length": 5.0, "width": 2.0, "maxPosAcc": 2.0, "maxNegAcc": 4.5, "usualPosAcc": 2.0, "usualNegAcc": 4.5, "minGap": 2.5, "maxSpeed": 11.111, "headwayTime": 2}, "route": ["road_4_0_1", "road_4_1_1", "road_4_2_1", "road_4_3_1", "road_4_4_1", "road_4_5_1", "road_4_6_1", "road_4_7_1", "road_4_8_1", "road_4_9_1", "road_4_10_1", "road_4_11_1", "road_4_12_1", "road_4_13_1", "road_4_14_1", "road_4_15_1", "road_4_16_1", "road_4_17_1", "road_4_18_1", "road_4_19_1", "road_4_20_1", "road_4_21_1", "road_4_22_1", "road_4_23_1", "road_4_24_1", "road_4_25_1", "road_4_26_1", "road_4_27_1", "road_4_28_1"], "interval": 1.0, "startTime": 283, "endTime": 283},
{"vehicle": {"length": 5.0, "width": 2.0, "maxPosAcc": 2.0, "maxNegAcc": 4.5, "usualPosAcc": 2.0, "usualNegAcc": 4.5, "minGap": 2.5, "maxSpeed": 11.111, "headwayTime": 2}, "route": ["road_0_18_0", "road_1_18_0", "road_2_18_3", "road_2_17_3", "road_2_16_3", "road_2_15_3", "road_2_14_3", "road_2_13_3", "road_2_12_3", "road_2_11_2", "road_1_11_2"], "interval": 1.0, "startTime": 283, "endTime": 283},
{"vehicle": {"length": 5.0, "width": 2.0, "maxPosAcc": 2.0, "maxNegAcc": 4.5, "usualPosAcc": 2.0, "usualNegAcc": 4.5, "minGap": 2.5, "maxSpeed": 11.111, "headwayTime": 2}, "route": ["road_8_9_2", "road_7_9_3", "road_7_8_3", "road_7_7_3", "road_7_6_3", "road_7_5_3", "road_7_4_0"], "interval": 1.0, "startTime": 284, "endTime": 284},
{"vehicle": {"length": 5.0, "width": 2.0, "maxPosAcc": 2.0, "maxNegAcc": 4.5, "usualPosAcc": 2.0, "usualNegAcc": 4.5, "minGap": 2.5, "maxSpeed": 11.111, "headwayTime": 2}, "route": ["road_2_29_3", "road_2_28_0", "road_3_28_3", "road_3_27_2", "road_2_27_3", "road_2_26_3", "road_2_25_3", "road_2_24_3", "road_2_23_3", "road_2_22_3", "road_2_21_3", "road_2_20_3", "road_2_19_3", "road_2_18_3", "road_2_17_3", "road_2_16_3", "road_2_15_3", "road_2_14_3", "road_2_13_3", "road_2_12_3", "road_2_11_3", "road_2_10_2", "road_1_10_2"], "interval": 1.0, "startTime": 284, "endTime": 284},
{"vehicle": {"length": 5.0, "width": 2.0, "maxPosAcc": 2.0, "maxNegAcc": 4.5, "usualPosAcc": 2.0, "usualNegAcc": 4.5, "minGap": 2.5, "maxSpeed": 11.111, "headwayTime": 2}, "route": ["road_2_0_1", "road_2_1_2", "road_1_1_3"], "interval": 1.0, "startTime": 284, "endTime": 284},
{"vehicle": {"length": 5.0, "width": 2.0, "maxPosAcc": 2.0, "maxNegAcc": 4.5, "usualPosAcc": 2.0, "usualNegAcc": 4.5, "minGap": 2.5, "maxSpeed": 11.111, "headwayTime": 2}, "route": ["road_0_5_0", "road_1_5_1", "road_1_6_1", "road_1_7_1", "road_1_8_1", "road_1_9_1", "road_1_10_1", "road_1_11_1", "road_1_12_1", "road_1_13_1", "road_1_14_1", "road_1_15_1", "road_1_16_1", "road_1_17_1", "road_1_18_1", "road_1_19_1", "road_1_20_1", "road_1_21_1", "road_1_22_2"], "interval": 1.0, "startTime": 285, "endTime": 285},
{"vehicle": {"length": 5.0, "width": 2.0, "maxPosAcc": 2.0, "maxNegAcc": 4.5, "usualPosAcc": 2.0, "usualNegAcc": 4.5, "minGap": 2.5, "maxSpeed": 11.111, "headwayTime": 2}, "route": ["road_1_0_1", "road_1_1_1", "road_1_2_1", "road_1_3_1", "road_1_4_1", "road_1_5_1", "road_1_6_1", "road_1_7_1", "road_1_8_1", "road_1_9_1", "road_1_10_1", "road_1_11_1", "road_1_12_2"], "interval": 1.0, "startTime": 286, "endTime": 286},
{"vehicle": {"length": 5.0, "width": 2.0, "maxPosAcc": 2.0, "maxNegAcc": 4.5, "usualPosAcc": 2.0, "usualNegAcc": 4.5, "minGap": 2.5, "maxSpeed": 11.111, "headwayTime": 2}, "route": ["road_0_27_0", "road_1_27_1", "road_1_28_0", "road_2_28_0", "road_3_28_0", "road_4_28_0", "road_5_28_3", "road_5_27_3", "road_5_26_3", "road_5_25_3", "road_5_24_3", "road_5_23_3", "road_5_22_3", "road_5_21_3", "road_5_20_3", "road_5_19_3", "road_5_18_3", "road_5_17_0", "road_6_17_0", "road_7_17_3", "road_7_16_3", "road_7_15_3", "road_7_14_3", "road_7_13_3", "road_7_12_3", "road_7_11_0"], "interval": 1.0, "startTime": 287, "endTime": 287},
{"vehicle": {"length": 5.0, "width": 2.0, "maxPosAcc": 2.0, "maxNegAcc": 4.5, "usualPosAcc": 2.0, "usualNegAcc": 4.5, "minGap": 2.5, "maxSpeed": 11.111, "headwayTime": 2}, "route": ["road_3_0_1", "road_3_1_2", "road_2_1_1", "road_2_2_0", "road_3_2_0", "road_4_2_0", "road_5_2_3", "road_5_1_2", "road_4_1_3"], "interval": 1.0, "startTime": 288, "endTime": 288},
{"vehicle": {"length": 5.0, "width": 2.0, "maxPosAcc": 2.0, "maxNegAcc": 4.5, "usualPosAcc": 2.0, "usualNegAcc": 4.5, "minGap": 2.5, "maxSpeed": 11.111, "headwayTime": 2}, "route": ["road_6_0_1", "road_6_1_2", "road_5_1_2", "road_4_1_2", "road_3_1_2", "road_2_1_2", "road_1_1_3"], "interval": 1.0, "startTime": 288, "endTime": 288},
{"vehicle": {"length": 5.0, "width": 2.0, "maxPosAcc": 2.0, "maxNegAcc": 4.5, "usualPosAcc": 2.0, "usualNegAcc": 4.5, "minGap": 2.5, "maxSpeed": 11.111, "headwayTime": 2}, "route": ["road_0_12_0", "road_1_12_0", "road_2_12_1", "road_2_13_1", "road_2_14_1", "road_2_15_1", "road_2_16_1", "road_2_17_1", "road_2_18_1", "road_2_19_1", "road_2_20_1", "road_2_21_1", "road_2_22_1", "road_2_23_1", "road_2_24_1", "road_2_25_1", "road_2_26_0", "road_3_26_0", "road_4_26_1", "road_4_27_1", "road_4_28_0", "road_5_28_1"], "interval": 1.0, "startTime": 288, "endTime": 288},
{"vehicle": {"length": 5.0, "width": 2.0, "maxPosAcc": 2.0, "maxNegAcc": 4.5, "usualPosAcc": 2.0, "usualNegAcc": 4.5, "minGap": 2.5, "maxSpeed": 11.111, "headwayTime": 2}, "route": ["road_1_29_3", "road_1_28_0", "road_2_28_3", "road_2_27_3", "road_2_26_3", "road_2_25_3", "road_2_24_3", "road_2_23_3", "road_2_22_3", "road_2_21_3", "road_2_20_3", "road_2_19_3", "road_2_18_3", "road_2_17_3", "road_2_16_3", "road_2_15_3", "road_2_14_3", "road_2_13_3", "road_2_12_3", "road_2_11_3", "road_2_10_3", "road_2_9_3", "road_2_8_3", "road_2_7_2", "road_1_7_2"], "interval": 1.0, "startTime": 288, "endTime": 288},
{"vehicle": {"length": 5.0, "width": 2.0, "maxPosAcc": 2.0, "maxNegAcc": 4.5, "usualPosAcc": 2.0, "usualNegAcc": 4.5, "minGap": 2.5, "maxSpeed": 11.111, "headwayTime": 2}, "route": ["road_8_20_2", "road_7_20_3", "road_7_19_3", "road_7_18_3", "road_7_17_3", "road_7_16_3", "road_7_15_3", "road_7_14_3", "road_7_13_2", "road_6_13_2", "road_5_13_2", "road_4_13_2", "road_3_13_2", "road_2_13_2", "road_1_13_2"], "interval": 1.0, "startTime": 289, "endTime": 289},
[truncated: 7,258,942 more chars]
