# Supplementary material
Source: ML conference proceedings conference paper supplement (https://proceedings.neurips.cc/paper_files/paper/2021/hash/654516d1b4df6917094de807156adc14-Abstract.html)
Supplement: Supplementary file 1 [file 654516d1b4df6917094de807156adc14-Supplemental.zip › neurips-supplementary/codes/data/NewYork/28_7/roadnet_28_7.json]

{
  "intersections": [
    {
      "id": "intersection_0_1",
      "point": {
        "x": -300,
        "y": 0
      },
      "width": 0,
      "roads": [
        "road_1_1_2",
        "road_0_1_0"
      ],
      "roadLinks": [],
      "trafficLight": {
        "roadLinkIndices": [],
        "lightphases": [
          {
            "time": 5,
            "availableRoadLinks": []
          },
          {
            "time": 30,
            "availableRoadLinks": []
          },
          {
            "time": 30,
            "availableRoadLinks": []
          },
          {
            "time": 30,
            "availableRoadLinks": []
          },
          {
            "time": 30,
            "availableRoadLinks": []
          },
          {
            "time": 30,
            "availableRoadLinks": []
          },
          {
            "time": 30,
            "availableRoadLinks": []
          },
          {
            "time": 30,
            "availableRoadLinks": []
          },
          {
            "time": 30,
            "availableRoadLinks": []
          }
        ]
      },
      "virtual": true
    },
    {
      "id": "intersection_0_2",
      "point": {
        "x": -300,
        "y": 300
      },
      "width": 0,
      "roads": [
        "road_1_2_2",
        "road_0_2_0"
      ],
      "roadLinks": [],
      "trafficLight": {
        "roadLinkIndices": [],
        "lightphases": [
          {
            "time": 5,
            "availableRoadLinks": []
          },
          {
            "time": 30,
            "availableRoadLinks": []
          },
          {
            "time": 30,
            "availableRoadLinks": []
          },
          {
            "time": 30,
            "availableRoadLinks": []
          },
          {
            "time": 30,
            "availableRoadLinks": []
          },
          {
            "time": 30,
            "availableRoadLinks": []
          },
          {
            "time": 30,
            "availableRoadLinks": []
          },
          {
            "time": 30,
            "availableRoadLinks": []
          },
          {
            "time": 30,
            "availableRoadLinks": []
          }
        ]
      },
      "virtual": true
    },
    {
      "id": "intersection_0_3",
      "point": {
        "x": -300,
        "y": 600
      },
      "width": 0,
      "roads": [
        "road_1_3_2",
        "road_0_3_0"
      ],
      "roadLinks": [],
      "trafficLight": {
        "roadLinkIndices": [],
        "lightphases": [
          {
            "time": 5,
            "availableRoadLinks": []
          },
          {
            "time": 30,
            "availableRoadLinks": []
          },
          {
            "time": 30,
            "availableRoadLinks": []
          },
          {
            "time": 30,
            "availableRoadLinks": []
          },
          {
            "time": 30,
            "availableRoadLinks": []
          },
          {
            "time": 30,
            "availableRoadLinks": []
          },
          {
            "time": 30,
            "availableRoadLinks": []
          },
          {
            "time": 30,
            "availableRoadLinks": []
          },
          {
            "time": 30,
            "availableRoadLinks": []
          }
        ]
      },
      "virtual": true
    },
    {
      "id": "intersection_0_4",
      "point": {
        "x": -300,
        "y": 900
      },
      "width": 0,
      "roads": [
        "road_1_4_2",
        "road_0_4_0"
      ],
      "roadLinks": [],
      "trafficLight": {
        "roadLinkIndices": [],
        "lightphases": [
          {
            "time": 5,
            "availableRoadLinks": []
          },
          {
            "time": 30,
            "availableRoadLinks": []
          },
          {
            "time": 30,
            "availableRoadLinks": []
          },
          {
            "time": 30,
            "availableRoadLinks": []
          },
          {
            "time": 30,
            "availableRoadLinks": []
          },
          {
            "time": 30,
            "availableRoadLinks": []
          },
          {
            "time": 30,
            "availableRoadLinks": []
          },
          {
            "time": 30,
            "availableRoadLinks": []
          },
          {
            "time": 30,
            "availableRoadLinks": []
          }
        ]
      },
      "virtual": true
    },
    {
      "id": "intersection_0_5",
      "point": {
        "x": -300,
        "y": 1200
      },
      "width": 0,
      "roads": [
        "road_1_5_2",
        "road_0_5_0"
      ],
      "roadLinks": [],
      "trafficLight": {
        "roadLinkIndices": [],
        "lightphases": [
          {
            "time": 5,
            "availableRoadLinks": []
          },
          {
            "time": 30,
            "availableRoadLinks": []
          },
          {
            "time": 30,
            "availableRoadLinks": []
          },
          {
            "time": 30,
            "availableRoadLinks": []
          },
          {
            "time": 30,
            "availableRoadLinks": []
          },
          {
            "time": 30,
            "availableRoadLinks": []
          },
          {
            "time": 30,
            "availableRoadLinks": []
          },
          {
            "time": 30,
            "availableRoadLinks": []
          },
          {
            "time": 30,
            "availableRoadLinks": []
          }
        ]
      },
      "virtual": true
    },
    {
      "id": "intersection_0_6",
      "point": {
        "x": -300,
        "y": 1500
      },
      "width": 0,
      "roads": [
        "road_1_6_2",
        "road_0_6_0"
      ],
      "roadLinks": [],
      "trafficLight": {
        "roadLinkIndices": [],
        "lightphases": [
          {
            "time": 5,
            "availableRoadLinks": []
          },
          {
            "time": 30,
            "availableRoadLinks": []
          },
          {
            "time": 30,
            "availableRoadLinks": []
          },
          {
            "time": 30,
            "availableRoadLinks": []
          },
          {
            "time": 30,
            "availableRoadLinks": []
          },
          {
            "time": 30,
            "availableRoadLinks": []
          },
          {
            "time": 30,
            "availableRoadLinks": []
          },
          {
            "time": 30,
            "availableRoadLinks": []
          },
          {
            "time": 30,
            "availableRoadLinks": []
          }
        ]
      },
      "virtual": true
    },
    {
      "id": "intersection_0_7",
      "point": {
        "x": -300,
        "y": 1800
      },
      "width": 0,
      "roads": [
        "road_1_7_2",
        "road_0_7_0"
      ],
      "roadLinks": [],
      "trafficLight": {
        "roadLinkIndices": [],
        "lightphases": [
          {
            "time": 5,
            "availableRoadLinks": []
          },
          {
            "time": 30,
            "availableRoadLinks": []
          },
          {
            "time": 30,
            "availableRoadLinks": []
          },
          {
            "time": 30,
            "availableRoadLinks": []
          },
          {
            "time": 30,
            "availableRoadLinks": []
          },
          {
            "time": 30,
            "availableRoadLinks": []
          },
          {
            "time": 30,
            "availableRoadLinks": []
          },
          {
            "time": 30,
            "availableRoadLinks": []
          },
          {
            "time": 30,
            "availableRoadLinks": []
          }
        ]
      },
      "virtual": true
    },
    {
      "id": "intersection_0_8",
      "point": {
        "x": -300,
        "y": 2100
      },
      "width": 0,
      "roads": [
        "road_1_8_2",
        "road_0_8_0"
      ],
      "roadLinks": [],
      "trafficLight": {
        "roadLinkIndices": [],
        "lightphases": [
          {
            "time": 5,
            "availableRoadLinks": []
          },
          {
            "time": 30,
            "availableRoadLinks": []
          },
          {
            "time": 30,
            "availableRoadLinks": []
          },
          {
            "time": 30,
            "availableRoadLinks": []
          },
          {
            "time": 30,
            "availableRoadLinks": []
          },
          {
            "time": 30,
            "availableRoadLinks": []
          },
          {
            "time": 30,
            "availableRoadLinks": []
          },
          {
            "time": 30,
            "availableRoadLinks": []
          },
          {
            "time": 30,
            "availableRoadLinks": []
          }
        ]
      },
      "virtual": true
    },
    {
      "id": "intersection_0_9",
      "point": {
        "x": -300,
        "y": 2400
      },
      "width": 0,
      "roads": [
        "road_1_9_2",
        "road_0_9_0"
      ],
      "roadLinks": [],
      "trafficLight": {
        "roadLinkIndices": [],
        "lightphases": [
          {
            "time": 5,
            "availableRoadLinks": []
          },
          {
            "time": 30,
            "availableRoadLinks": []
          },
          {
            "time": 30,
            "availableRoadLinks": []
          },
          {
            "time": 30,
            "availableRoadLinks": []
          },
          {
            "time": 30,
            "availableRoadLinks": []
          },
          {
            "time": 30,
            "availableRoadLinks": []
          },
          {
            "time": 30,
            "availableRoadLinks": []
          },
          {
            "time": 30,
            "availableRoadLinks": []
          },
          {
            "time": 30,
            "availableRoadLinks": []
          }
        ]
      },
      "virtual": true
    },
    {
      "id": "intersection_0_10",
      "point": {
        "x": -300,
        "y": 2700
      },
      "width": 0,
      "roads": [
        "road_1_10_2",
        "road_0_10_0"
      ],
      "roadLinks": [],
      "trafficLight": {
        "roadLinkIndices": [],
        "lightphases": [
          {
            "time": 5,
            "availableRoadLinks": []
          },
          {
            "time": 30,
            "availableRoadLinks": []
          },
          {
            "time": 30,
            "availableRoadLinks": []
          },
          {
            "time": 30,
            "availableRoadLinks": []
          },
          {
            "time": 30,
            "availableRoadLinks": []
          },
          {
            "time": 30,
            "availableRoadLinks": []
          },
          {
            "time": 30,
            "availableRoadLinks": []
          },
          {
            "time": 30,
            "availableRoadLinks": []
          },
          {
            "time": 30,
            "availableRoadLinks": []
          }
        ]
      },
      "virtual": true
    },
    {
      "id": "intersection_0_11",
      "point": {
        "x": -300,
        "y": 3000
      },
      "width": 0,
      "roads": [
        "road_1_11_2",
        "road_0_11_0"
      ],
      "roadLinks": [],
      "trafficLight": {
        "roadLinkIndices": [],
        "lightphases": [
          {
            "time": 5,
            "availableRoadLinks": []
          },
          {
            "time": 30,
            "availableRoadLinks": []
          },
          {
            "time": 30,
            "availableRoadLinks": []
          },
          {
            "time": 30,
            "availableRoadLinks": []
          },
          {
            "time": 30,
            "availableRoadLinks": []
          },
          {
            "time": 30,
            "availableRoadLinks": []
          },
          {
            "time": 30,
            "availableRoadLinks": []
          },
          {
            "time": 30,
            "availableRoadLinks": []
          },
          {
            "time": 30,
            "availableRoadLinks": []
          }
        ]
      },
      "virtual": true
    },
    {
      "id": "intersection_0_12",
      "point": {
        "x": -300,
        "y": 3300
      },
      "width": 0,
      "roads": [
        "road_1_12_2",
        "road_0_12_0"
      ],
      "roadLinks": [],
      "trafficLight": {
        "roadLinkIndices": [],
        "lightphases": [
          {
            "time": 5,
            "availableRoadLinks": []
          },
          {
            "time": 30,
            "availableRoadLinks": []
          },
          {
            "time": 30,
            "availableRoadLinks": []
          },
          {
            "time": 30,
            "availableRoadLinks": []
          },
          {
            "time": 30,
            "availableRoadLinks": []
          },
          {
            "time": 30,
            "availableRoadLinks": []
          },
          {
            "time": 30,
            "availableRoadLinks": []
          },
          {
            "time": 30,
            "availableRoadLinks": []
          },
          {
            "time": 30,
            "availableRoadLinks": []
          }
        ]
      },
      "virtual": true
    },
    {
      "id": "intersection_0_13",
      "point": {
        "x": -300,
        "y": 3600
      },
      "width": 0,
      "roads": [
        "road_1_13_2",
        "road_0_13_0"
      ],
      "roadLinks": [],
      "trafficLight": {
        "roadLinkIndices": [],
        "lightphases": [
          {
            "time": 5,
            "availableRoadLinks": []
          },
          {
            "time": 30,
            "availableRoadLinks": []
          },
          {
            "time": 30,
            "availableRoadLinks": []
          },
          {
            "time": 30,
            "availableRoadLinks": []
          },
          {
            "time": 30,
            "availableRoadLinks": []
          },
          {
            "time": 30,
            "availableRoadLinks": []
          },
          {
            "time": 30,
            "availableRoadLinks": []
          },
          {
            "time": 30,
            "availableRoadLinks": []
          },
          {
            "time": 30,
            "availableRoadLinks": []
          }
        ]
      },
      "virtual": true
    },
    {
      "id": "intersection_0_14",
      "point": {
        "x": -300,
        "y": 3900
      },
      "width": 0,
      "roads": [
        "road_1_14_2",
        "road_0_14_0"
      ],
      "roadLinks": [],
      "trafficLight": {
        "roadLinkIndices": [],
        "lightphases": [
          {
            "time": 5,
            "availableRoadLinks": []
          },
          {
            "time": 30,
            "availableRoadLinks": []
          },
          {
            "time": 30,
            "availableRoadLinks": []
          },
          {
            "time": 30,
            "availableRoadLinks": []
          },
          {
            "time": 30,
            "availableRoadLinks": []
          },
          {
            "time": 30,
            "availableRoadLinks": []
          },
          {
            "time": 30,
            "availableRoadLinks": []
          },
          {
            "time": 30,
            "availableRoadLinks": []
          },
          {
            "time": 30,
            "availableRoadLinks": []
          }
        ]
      },
      "virtual": true
    },
    {
      "id": "intersection_0_15",
      "point": {
        "x": -300,
        "y": 4200
      },
      "width": 0,
      "roads": [
        "road_1_15_2",
        "road_0_15_0"
      ],
      "roadLinks": [],
      "trafficLight": {
        "roadLinkIndices": [],
        "lightphases": [
          {
            "time": 5,
            "availableRoadLinks": []
          },
          {
            "time": 30,
            "availableRoadLinks": []
          },
          {
            "time": 30,
            "availableRoadLinks": []
          },
          {
            "time": 30,
            "availableRoadLinks": []
          },
          {
            "time": 30,
            "availableRoadLinks": []
          },
          {
            "time": 30,
            "availableRoadLinks": []
          },
          {
            "time": 30,
            "availableRoadLinks": []
          },
          {
            "time": 30,
            "availableRoadLinks": []
          },
          {
            "time": 30,
            "availableRoadLinks": []
          }
        ]
      },
      "virtual": true
    },
    {
      "id": "intersection_0_16",
      "point": {
        "x": -300,
        "y": 4500
      },
      "width": 0,
      "roads": [
        "road_1_16_2",
        "road_0_16_0"
      ],
      "roadLinks": [],
      "trafficLight": {
        "roadLinkIndices": [],
        "lightphases": [
          {
            "time": 5,
            "availableRoadLinks": []
          },
          {
            "time": 30,
            "availableRoadLinks": []
          },
          {
            "time": 30,
            "availableRoadLinks": []
          },
          {
            "time": 30,
            "availableRoadLinks": []
          },
          {
            "time": 30,
            "availableRoadLinks": []
          },
          {
            "time": 30,
            "availableRoadLinks": []
          },
          {
            "time": 30,
            "availableRoadLinks": []
          },
          {
            "time": 30,
            "availableRoadLinks": []
          },
          {
            "time": 30,
            "availableRoadLinks": []
          }
        ]
      },
      "virtual": true
    },
    {
      "id": "intersection_0_17",
      "point": {
        "x": -300,
        "y": 4800
      },
      "width": 0,
      "roads": [
        "road_1_17_2",
        "road_0_17_0"
      ],
      "roadLinks": [],
      "trafficLight": {
        "roadLinkIndices": [],
        "lightphases": [
          {
            "time": 5,
            "availableRoadLinks": []
          },
          {
            "time": 30,
            "availableRoadLinks": []
          },
          {
            "time": 30,
            "availableRoadLinks": []
          },
          {
            "time": 30,
            "availableRoadLinks": []
          },
          {
            "time": 30,
            "availableRoadLinks": []
          },
          {
            "time": 30,
            "availableRoadLinks": []
          },
          {
            "time": 30,
            "availableRoadLinks": []
          },
          {
            "time": 30,
            "availableRoadLinks": []
          },
          {
            "time": 30,
            "availableRoadLinks": []
          }
        ]
      },
      "virtual": true
    },
    {
      "id": "intersection_0_18",
      "point": {
        "x": -300,
        "y": 5100
      },
      "width": 0,
      "roads": [
        "road_1_18_2",
        "road_0_18_0"
      ],
      "roadLinks": [],
      "trafficLight": {
        "roadLinkIndices": [],
        "lightphases": [
          {
            "time": 5,
            "availableRoadLinks": []
          },
          {
            "time": 30,
            "availableRoadLinks": []
          },
          {
            "time": 30,
            "availableRoadLinks": []
          },
          {
            "time": 30,
            "availableRoadLinks": []
          },
          {
            "time": 30,
            "availableRoadLinks": []
          },
          {
            "time": 30,
            "availableRoadLinks": []
          },
          {
            "time": 30,
            "availableRoadLinks": []
          },
          {
            "time": 30,
            "availableRoadLinks": []
          },
          {
            "time": 30,
            "availableRoadLinks": []
          }
        ]
      },
      "virtual": true
    },
    {
      "id": "intersection_0_19",
      "point": {
        "x": -300,
        "y": 5400
      },
      "width": 0,
      "roads": [
        "road_1_19_2",
        "road_0_19_0"
      ],
      "roadLinks": [],
      "trafficLight": {
        "roadLinkIndices": [],
        "lightphases": [
          {
            "time": 5,
            "availableRoadLinks": []
          },
          {
            "time": 30,
            "availableRoadLinks": []
          },
          {
            "time": 30,
            "availableRoadLinks": []
          },
          {
            "time": 30,
            "availableRoadLinks": []
          },
          {
            "time": 30,
            "availableRoadLinks": []
          },
          {
            "time": 30,
            "availableRoadLinks": []
          },
          {
            "time": 30,
            "availableRoadLinks": []
          },
          {
            "time": 30,
            "availableRoadLinks": []
          },
          {
            "time": 30,
            "availableRoadLinks": []
          }
        ]
      },
      "virtual": true
    },
    {
      "id": "intersection_0_20",
      "point": {
        "x": -300,
        "y": 5700
      },
      "width": 0,
      "roads": [
        "road_1_20_2",
        "road_0_20_0"
      ],
      "roadLinks": [],
      "trafficLight": {
        "roadLinkIndices": [],
        "lightphases": [
          {
            "time": 5,
            "availableRoadLinks": []
          },
          {
            "time": 30,
            "availableRoadLinks": []
          },
          {
            "time": 30,
            "availableRoadLinks": []
          },
          {
            "time": 30,
            "availableRoadLinks": []
          },
          {
            "time": 30,
            "availableRoadLinks": []
          },
          {
            "time": 30,
            "availableRoadLinks": []
          },
          {
            "time": 30,
            "availableRoadLinks": []
          },
          {
            "time": 30,
            "availableRoadLinks": []
          },
          {
            "time": 30,
            "availableRoadLinks": []
          }
        ]
      },
      "virtual": true
    },
    {
      "id": "intersection_0_21",
      "point": {
        "x": -300,
        "y": 6000
      },
      "width": 0,
      "roads": [
        "road_1_21_2",
        "road_0_21_0"
      ],
      "roadLinks": [],
      "trafficLight": {
        "roadLinkIndices": [],
        "lightphases": [
          {
            "time": 5,
            "availableRoadLinks": []
          },
          {
            "time": 30,
            "availableRoadLinks": []
          },
          {
            "time": 30,
            "availableRoadLinks": []
          },
          {
            "time": 30,
            "availableRoadLinks": []
          },
          {
            "time": 30,
            "availableRoadLinks": []
          },
          {
            "time": 30,
            "availableRoadLinks": []
          },
          {
            "time": 30,
            "availableRoadLinks": []
          },
          {
            "time": 30,
            "availableRoadLinks": []
          },
          {
            "time": 30,
            "availableRoadLinks": []
          }
        ]
      },
      "virtual": true
    },
    {
      "id": "intersection_0_22",
      "point": {
        "x": -300,
        "y": 6300
      },
      "width": 0,
      "roads": [
        "road_1_22_2",
        "road_0_22_0"
      ],
      "roadLinks": [],
      "trafficLight": {
        "roadLinkIndices": [],
        "lightphases": [
          {
            "time": 5,
            "availableRoadLinks": []
          },
          {
            "time": 30,
            "availableRoadLinks": []
          },
          {
            "time": 30,
            "availableRoadLinks": []
          },
          {
            "time": 30,
            "availableRoadLinks": []
          },
          {
            "time": 30,
            "availableRoadLinks": []
          },
          {
            "time": 30,
            "availableRoadLinks": []
          },
          {
            "time": 30,
            "availableRoadLinks": []
          },
          {
            "time": 30,
            "availableRoadLinks": []
          },
          {
            "time": 30,
            "availableRoadLinks": []
          }
        ]
      },
      "virtual": true
    },
    {
      "id": "intersection_0_23",
      "point": {
        "x": -300,
        "y": 6600
      },
      "width": 0,
      "roads": [
        "road_1_23_2",
        "road_0_23_0"
      ],
      "roadLinks": [],
      "trafficLight": {
        "roadLinkIndices": [],
        "lightphases": [
          {
            "time": 5,
            "availableRoadLinks": []
          },
          {
            "time": 30,
            "availableRoadLinks": []
          },
          {
            "time": 30,
            "availableRoadLinks": []
          },
          {
            "time": 30,
            "availableRoadLinks": []
          },
          {
            "time": 30,
            "availableRoadLinks": []
          },
          {
            "time": 30,
            "availableRoadLinks": []
          },
          {
            "time": 30,
            "availableRoadLinks": []
          },
          {
            "time": 30,
            "availableRoadLinks": []
          },
          {
            "time": 30,
            "availableRoadLinks": []
          }
        ]
      },
      "virtual": true
    },
    {
      "id": "intersection_0_24",
      "point": {
        "x": -300,
        "y": 6900
      },
      "width": 0,
      "roads": [
        "road_1_24_2",
        "road_0_24_0"
      ],
      "roadLinks": [],
      "trafficLight": {
        "roadLinkIndices": [],
        "lightphases": [
          {
            "time": 5,
            "availableRoadLinks": []
          },
          {
            "time": 30,
            "availableRoadLinks": []
          },
          {
            "time": 30,
            "availableRoadLinks": []
          },
          {
            "time": 30,
            "availableRoadLinks": []
          },
          {
            "time": 30,
            "availableRoadLinks": []
          },
          {
            "time": 30,
            "availableRoadLinks": []
          },
          {
            "time": 30,
            "availableRoadLinks": []
          },
          {
            "time": 30,
            "availableRoadLinks": []
          },
          {
            "time": 30,
            "availableRoadLinks": []
          }
        ]
      },
      "virtual": true
    },
    {
      "id": "intersection_0_25",
      "point": {
        "x": -300,
        "y": 7200
      },
      "width": 0,
      "roads": [
        "road_1_25_2",
        "road_0_25_0"
      ],
      "roadLinks": [],
      "trafficLight": {
        "roadLinkIndices": [],
        "lightphases": [
          {
            "time": 5,
            "availableRoadLinks": []
          },
          {
            "time": 30,
            "availableRoadLinks": []
          },
          {
            "time": 30,
            "availableRoadLinks": []
          },
          {
            "time": 30,
            "availableRoadLinks": []
          },
          {
            "time": 30,
            "availableRoadLinks": []
          },
          {
            "time": 30,
            "availableRoadLinks": []
          },
          {
            "time": 30,
            "availableRoadLinks": []
          },
          {
            "time": 30,
            "availableRoadLinks": []
          },
          {
            "time": 30,
            "availableRoadLinks": []
          }
        ]
      },
      "virtual": true
    },
    {
      "id": "intersection_0_26",
      "point": {
        "x": -300,
        "y": 7500
      },
      "width": 0,
      "roads": [
        "road_1_26_2",
        "road_0_26_0"
      ],
      "roadLinks": [],
      "trafficLight": {
        "roadLinkIndices": [],
        "lightphases": [
          {
            "time": 5,
            "availableRoadLinks": []
          },
          {
            "time": 30,
            "availableRoadLinks": []
          },
          {
            "time": 30,
            "availableRoadLinks": []
          },
          {
            "time": 30,
            "availableRoadLinks": []
          },
          {
            "time": 30,
            "availableRoadLinks": []
          },
          {
            "time": 30,
            "availableRoadLinks": []
          },
          {
            "time": 30,
            "availableRoadLinks": []
          },
          {
            "time": 30,
            "availableRoadLinks": []
          },
          {
            "time": 30,
            "availableRoadLinks": []
          }
        ]
      },
      "virtual": true
    },
    {
      "id": "intersection_0_27",
      "point": {
        "x": -300,
        "y": 7800
      },
      "width": 0,
      "roads": [
        "road_1_27_2",
        "road_0_27_0"
      ],
      "roadLinks": [],
      "trafficLight": {
        "roadLinkIndices": [],
        "lightphases": [
          {
            "time": 5,
            "availableRoadLinks": []
          },
          {
            "time": 30,
            "availableRoadLinks": []
          },
          {
            "time": 30,
            "availableRoadLinks": []
          },
          {
            "time": 30,
            "availableRoadLinks": []
          },
          {
            "time": 30,
            "availableRoadLinks": []
          },
          {
            "time": 30,
            "availableRoadLinks": []
          },
          {
            "time": 30,
            "availableRoadLinks": []
          },
          {
            "time": 30,
            "availableRoadLinks": []
          },
          {
            "time": 30,
            "availableRoadLinks": []
          }
        ]
      },
      "virtual": true
    },
    {
      "id": "intersection_0_28",
      "point": {
        "x": -300,
        "y": 8100
      },
      "width": 0,
      "roads": [
        "road_1_28_2",
        "road_0_28_0"
      ],
      "roadLinks": [],
      "trafficLight": {
        "roadLinkIndices": [],
        "lightphases": [
          {
            "time": 5,
            "availableRoadLinks": []
          },
          {
            "time": 30,
            "availableRoadLinks": []
          },
          {
            "time": 30,
            "availableRoadLinks": []
          },
          {
            "time": 30,
            "availableRoadLinks": []
          },
          {
            "time": 30,
            "availableRoadLinks": []
          },
          {
            "time": 30,
            "availableRoadLinks": []
          },
          {
            "time": 30,
            "availableRoadLinks": []
          },
          {
            "time": 30,
            "availableRoadLinks": []
          },
          {
            "time": 30,
            "availableRoadLinks": []
          }
        ]
      },
      "virtual": true
    },
    {
      "id": "intersection_1_0",
      "point": {
        "x": 0,
        "y": -300
      },
      "width": 0,
      "roads": [
        "road_1_1_3",
        "road_1_0_1"
      ],
      "roadLinks": [],
      "trafficLight": {
        "roadLinkIndices": [],
        "lightphases": [
          {
            "time": 5,
            "availableRoadLinks": []
          },
          {
            "time": 30,
            "availableRoadLinks": []
          },
          {
            "time": 30,
            "availableRoadLinks": []
          },
          {
            "time": 30,
            "availableRoadLinks": []
          },
          {
            "time": 30,
            "availableRoadLinks": []
          },
          {
            "time": 30,
            "availableRoadLinks": []
          },
          {
            "time": 30,
            "availableRoadLinks": []
          },
          {
            "time": 30,
            "availableRoadLinks": []
          },
          {
            "time": 30,
            "availableRoadLinks": []
          }
        ]
      },
      "virtual": true
    },
    {
      "id": "intersection_1_1",
      "point": {
        "x": 0,
        "y": 0
      },
      "width": 11,
      "roads": [
        "road_0_1_0",
        "road_1_0_1",
        "road_2_1_2",
        "road_1_2_3",
        "road_1_1_0",
        "road_1_1_1",
        "road_1_1_2",
        "road_1_1_3"
      ],
      "roadLinks": [
        {
          "type": "go_straight",
          "startRoad": "road_0_1_0",
          "endRoad": "road_1_1_0",
          "direction": 0,
          "laneLinks": [
            {
              "startLaneIndex": 1,
              "endLaneIndex": 0,
              "points": [
                {
                  "x": -11.0,
                  "y": -4.5
                },
                {
                  "x": -9.592,
                  "y": -4.416
                },
                {
                  "x": -7.656,
                  "y": -4.188
                },
                {
                  "x": -5.324,
                  "y": -3.852
                },
                {
                  "x": -2.7279999999999998,
                  "y": -3.444
                },
                {
                  "x": 0.0,
                  "y": -3.0
                },
                {
                  "x": 2.7279999999999998,
                  "y": -2.556
                },
                {
                  "x": 5.323999999999999,
                  "y": -2.148
                },
                {
                  "x": 7.655999999999999,
                  "y": -1.811999999999999
                },
                {
                  "x": 9.592,
                  "y": -1.584
                },
                {
                  "x": 11.0,
                  "y": -1.5
                }
              ]
            },
            {
              "startLaneIndex": 1,
              "endLaneIndex": 1,
              "points": [
                {
                  "x": -11.0,
                  "y": -4.5
                },
                {
                  "x": -9.592,
                  "y": -4.5
                },
                {
                  "x": -7.656,
                  "y": -4.5
                },
                {
                  "x": -5.324,
                  "y": -4.5
                },
                {
                  "x": -2.7279999999999998,
                  "y": -4.5
                },
                {
                  "x": 0.0,
                  "y": -4.5
                },
                {
                  "x": 2.7279999999999998,
                  "y": -4.5
                },
                {
                  "x": 5.323999999999999,
                  "y": -4.5
                },
                {
                  "x": 7.655999999999999,
                  "y": -4.499999999999999
                },
                {
                  "x": 9.592,
                  "y": -4.5
                },
                {
                  "x": 11.0,
                  "y": -4.5
                }
              ]
            },
            {
              "startLaneIndex": 1,
              "endLaneIndex": 2,
              "points": [
                {
                  "x": -11.0,
                  "y": -4.5
                },
                {
                  "x": -9.592,
                  "y": -4.584
                },
                {
                  "x": -7.656,
                  "y": -4.812
                },
                {
                  "x": -5.324,
                  "y": -5.148
                },
                {
                  "x": -2.7279999999999998,
                  "y": -5.556
                },
                {
                  "x": 0.0,
                  "y": -6.0
                },
                {
                  "x": 2.7279999999999998,
                  "y": -6.444
                },
                {
                  "x": 5.323999999999999,
                  "y": -6.852
                },
                {
                  "x": 7.655999999999999,
                  "y": -7.187999999999999
                },
                {
                  "x": 9.592,
                  "y": -7.416
                },
                {
                  "x": 11.0,
                  "y": -7.5
                }
              ]
            }
          ]
        },
        {
          "type": "turn_left",
          "startRoad": "road_0_1_0",
          "endRoad": "road_1_1_1",
          "direction": 0,
          "laneLinks": [
            {
              "startLaneIndex": 0,
              "endLaneIndex": 0,
              "points": [
                {
                  "x": -11.0,
                  "y": -1.5
                },
                {
                  "x": -9.759,
                  "y": -1.249
                },
                {
                  "x": -8.292,
                  "y": -0.552
                },
                {
                  "x": -6.683,
                  "y": 0.507
                },
                {
                  "x": -5.016,
                  "y": 1.844
                },
                {
                  "x": -3.375,
                  "y": 3.375
                },
                {
                  "x": -1.844,
                  "y": 5.016
                },
                {
                  "x": -0.507000000000001,
                  "y": 6.683
                },
                {
                  "x": 0.551999999999999,
                  "y": 8.292
                },
                {
                  "x": 1.249,
                  "y": 9.759
                },
                {
                  "x": 1.5,
                  "y": 11.0
                }
              ]
            },
            {
              "startLaneIndex": 0,
              "endLaneIndex": 1,
              "points": [
                {
                  "x": -11.0,
                  "y": -1.5
                },
                {
                  "x": -9.675,
                  "y": -1.249
                },
                {
                  "x": -7.98,
                  "y": -0.552
                },
                {
                  "x": -6.035,
                  "y": 0.507
                },
                {
                  "x": -3.96,
                  "y": 1.844
                },
                {
                  "x": -1.875,
                  "y": 3.375
                },
                {
                  "x": 0.1,
                  "y": 5.016
                },
                {
                  "x": 1.844999999999999,
                  "y": 6.683
                },
                {
                  "x": 3.239999999999999,
                  "y": 8.292
                },
                {
                  "x": 4.165,
                  "y": 9.759
                },
                {
                  "x": 4.5,
                  "y": 11.0
                }
              ]
            },
            {
              "startLaneIndex": 0,
              "endLaneIndex": 2,
              "points": [
                {
                  "x": -11.0,
                  "y": -1.5
                },
                {
                  "x": -9.591,
                  "y": -1.249
                },
                {
                  "x": -7.668,
                  "y": -0.552
                },
                {
                  "x": -5.387,
                  "y": 0.507
                },
                {
                  "x": -2.904,
                  "y": 1.844
                },
                {
                  "x": -0.375,
                  "y": 3.375
                },
                {
                  "x": 2.044,
                  "y": 5.016
                },
                {
                  "x": 4.196999999999999,
                  "y": 6.683
                },
                {
                  "x": 5.927999999999999,
                  "y": 8.292
                },
                {
                  "x": 7.081,
                  "y": 9.759
                },
                {
                  "x": 7.5,
                  "y": 11.0
                }
              ]
            }
          ]
        },
        {
          "type": "turn_right",
          "startRoad": "road_0_1_0",
          "endRoad": "road_1_1_3",
          "direction": 0,
          "laneLinks": [
            {
              "startLaneIndex": 2,
              "endLaneIndex": 0,
              "points": [
                {
                  "x": -11.0,
                  "y": -7.5
                },
                {
                  "x": -9.843,
                  "y": -7.499
                },
                {
                  "x": -8.604,
                  "y": -7.512
                },
                {
                  "x": -7.3309999999999995,
                  "y": -7.563
                },
                {
                  "x": -6.072,
                  "y": -7.676
                },
                {
                  "x": -4.875,
                  "y": -7.875
                },
                {
                  "x": -3.788,
                  "y": -8.184
                },
                {
                  "x": -2.859000000000001,
                  "y": -8.627
                },
                {
                  "x": -2.136000000000001,
                  "y": -9.228
                },
                {
                  "x": -1.6669999999999998,
                  "y": -10.011
                },
                {
                  "x": -1.5,
                  "y": -11.0
                }
              ]
            },
            {
              "startLaneIndex": 2,
              "endLaneIndex": 1,
              "points": [
                {
                  "x": -11.0,
                  "y": -7.5
                },
                {
                  "x": -9.927,
                  "y": -7.499
                },
                {
                  "x": -8.916,
                  "y": -7.512
                },
                {
                  "x": -7.979,
                  "y": -7.563
                },
                {
                  "x": -7.128,
                  "y": -7.676
                },
                {
                  "x": -6.375,
                  "y": -7.875
                },
                {
                  "x": -5.732,
                  "y": -8.184
                },
                {
                  "x": -5.211000000000001,
                  "y": -8.627
                },
                {
                  "x": -4.824000000000001,
                  "y": -9.228
                },
                {
                  "x": -4.583,
                  "y": -10.011
                },
                {
                  "x": -4.5,
                  "y": -11.0
                }
              ]
            },
            {
              "startLaneIndex": 2,
              "endLaneIndex": 2,
              "points": [
                {
                  "x": -11.0,
                  "y": -7.5
                },
                {
                  "x": -10.011,
                  "y": -7.499
                },
                {
                  "x": -9.228,
                  "y": -7.512
                },
                {
                  "x": -8.627,
                  "y": -7.563
                },
                {
                  "x": -8.184,
                  "y": -7.676
                },
                {
                  "x": -7.875,
                  "y": -7.875
                },
                {
                  "x": -7.676,
                  "y": -8.184
                },
                {
                  "x": -7.563000000000001,
                  "y": -8.627
                },
                {
                  "x": -7.512000000000001,
                  "y": -9.228
                },
                {
                  "x": -7.499,
                  "y": -10.011
                },
                {
                  "x": -7.5,
                  "y": -11.0
                }
              ]
            }
          ]
        },
        {
          "type": "turn_right",
          "startRoad": "road_1_0_1",
          "endRoad": "road_1_1_0",
          "direction": 1,
          "laneLinks": [
            {
              "startLaneIndex": 2,
              "endLaneIndex": 0,
              "points": [
                {
                  "x": 7.5,
                  "y": -11.0
                },
                {
                  "x": 7.499,
                  "y": -9.843
                },
                {
                  "x": 7.512,
                  "y": -8.604
                },
                {
                  "x": 7.563,
                  "y": -7.3309999999999995
                },
                {
                  "x": 7.676,
                  "y": -6.072
                },
                {
                  "x": 7.875,
                  "y": -4.875
                },
                {
                  "x": 8.184,
                  "y": -3.788
                },
                {
                  "x": 8.627,
                  "y": -2.859000000000001
                },
                {
                  "x": 9.228,
                  "y": -2.136000000000001
                },
                {
                  "x": 10.011,
                  "y": -1.6669999999999998
                },
                {
                  "x": 11.0,
                  "y": -1.5
                }
              ]
            },
            {
              "startLaneIndex": 2,
              "endLaneIndex": 1,
              "points": [
                {
                  "x": 7.5,
                  "y": -11.0
                },
                {
                  "x": 7.499,
                  "y": -9.927
                },
                {
                  "x": 7.512,
                  "y": -8.916
                },
                {
                  "x": 7.563,
                  "y": -7.979
                },
                {
                  "x": 7.676,
                  "y": -7.128
                },
                {
                  "x": 7.875,
                  "y": -6.375
                },
                {
                  "x": 8.184,
                  "y": -5.732
                },
                {
                  "x": 8.627,
                  "y": -5.211000000000001
                },
                {
                  "x": 9.228,
                  "y": -4.824000000000001
                },
                {
                  "x": 10.011,
                  "y": -4.583
                },
                {
                  "x": 11.0,
                  "y": -4.5
                }
              ]
            },
            {
              "startLaneIndex": 2,
              "endLaneIndex": 2,
              "points": [
                {
                  "x": 7.5,
                  "y": -11.0
                },
                {
                  "x": 7.499,
                  "y": -10.011
                },
                {
                  "x": 7.512,
                  "y": -9.228
                },
                {
                  "x": 7.563,
                  "y": -8.627
                },
                {
                  "x": 7.676,
                  "y": -8.184
                },
                {
                  "x": 7.875,
                  "y": -7.875
                },
                {
                  "x": 8.184,
                  "y": -7.676
                },
                {
                  "x": 8.627,
                  "y": -7.563000000000001
                },
                {
                  "x": 9.228,
                  "y": -7.512000000000001
                },
                {
                  "x": 10.011,
                  "y": -7.499
                },
                {
                  "x": 11.0,
                  "y": -7.5
                }
              ]
            }
          ]
        },
        {
          "type": "go_straight",
          "startRoad": "road_1_0_1",
          "endRoad": "road_1_1_1",
          "direction": 1,
          "laneLinks": [
            {
              "startLaneIndex": 1,
              "endLaneIndex": 0,
              "points": [
                {
                  "x": 4.5,
                  "y": -11.0
                },
                {
                  "x": 4.416,
                  "y": -9.592
                },
                {
                  "x": 4.188,
                  "y": -7.656
                },
                {
                  "x": 3.852,
                  "y": -5.324
                },
                {
                  "x": 3.444,
                  "y": -2.7279999999999998
                },
                {
                  "x": 3.0,
                  "y": 0.0
                },
                {
                  "x": 2.556,
                  "y": 2.7279999999999998
                },
                {
                  "x": 2.148,
                  "y": 5.323999999999999
                },
                {
                  "x": 1.811999999999999,
                  "y": 7.655999999999999
                },
                {
                  "x": 1.584,
                  "y": 9.592
                },
                {
                  "x": 1.5,
                  "y": 11.0
                }
              ]
            },
            {
              "startLaneIndex": 1,
              "endLaneIndex": 1,
              "points": [
                {
                  "x": 4.5,
                  "y": -11.0
                },
                {
                  "x": 4.5,
                  "y": -9.592
                },
                {
                  "x": 4.5,
                  "y": -7.656
                },
                {
                  "x": 4.5,
                  "y": -5.324
                },
                {
                  "x": 4.5,
                  "y": -2.7279999999999998
                },
                {
                  "x": 4.5,
                  "y": 0.0
                },
                {
                  "x": 4.5,
                  "y": 2.7279999999999998
                },
                {
                  "x": 4.5,
                  "y": 5.323999999999999
                },
                {
                  "x": 4.499999999999999,
                  "y": 7.655999999999999
                },
                {
                  "x": 4.5,
                  "y": 9.592
                },
                {
                  "x": 4.5,
                  "y": 11.0
                }
              ]
            },
            {
              "startLaneIndex": 1,
              "endLaneIndex": 2,
              "points": [
                {
                  "x": 4.5,
                  "y": -11.0
                },
                {
                  "x": 4.584,
                  "y": -9.592
                },
                {
                  "x": 4.812,
                  "y": -7.656
                },
                {
                  "x": 5.148,
                  "y": -5.324
                },
                {
                  "x": 5.556,
                  "y": -2.7279999999999998
                },
                {
                  "x": 6.0,
                  "y": 0.0
                },
                {
                  "x": 6.444,
                  "y": 2.7279999999999998
                },
                {
                  "x": 6.852,
                  "y": 5.323999999999999
                },
                {
                  "x": 7.187999999999999,
                  "y": 7.655999999999999
                },
                {
                  "x": 7.416,
                  "y": 9.592
                },
                {
                  "x": 7.5,
                  "y": 11.0
                }
              ]
            }
          ]
        },
        {
          "type": "turn_left",
          "startRoad": "road_1_0_1",
          "endRoad": "road_1_1_2",
          "direction": 1,
          "laneLinks": [
            {
              "startLaneIndex": 0,
              "endLaneIndex": 0,
              "points": [
                {
                  "x": 1.5,
                  "y": -11.0
                },
                {
                  "x": 1.249,
                  "y": -9.759
                },
                {
                  "x": 0.552,
                  "y": -8.292
                },
                {
                  "x": -0.507,
                  "y": -6.683
                },
                {
                  "x": -1.844,
                  "y": -5.016
                },
                {
                  "x": -3.375,
                  "y": -3.375
                },
                {
                  "x": -5.016,
                  "y": -1.844
                },
                {
                  "x": -6.683,
                  "y": -0.507000000000001
                },
                {
                  "x": -8.292,
                  "y": 0.551999999999999
                },
                {
                  "x": -9.759,
                  "y": 1.249
                },
                {
                  "x": -11.0,
                  "y": 1.5
                }
              ]
            },
            {
              "startLaneIndex": 0,
              "endLaneIndex": 1,
              "points": [
                {
                  "x": 1.5,
                  "y": -11.0
                },
                {
                  "x": 1.249,
                  "y": -9.675
                },
                {
                  "x": 0.552,
                  "y": -7.98
                },
                {
                  "x": -0.507,
                  "y": -6.035
                },
                {
                  "x": -1.844,
                  "y": -3.96
                },
                {
                  "x": -3.375,
                  "y": -1.875
                },
                {
                  "x": -5.016,
                  "y": 0.1
                },
                {
                  "x": -6.683,
                  "y": 1.844999999999999
                },
                {
                  "x": -8.292,
                  "y": 3.239999999999999
                },
                {
                  "x": -9.759,
                  "y": 4.165
                },
                {
                  "x": -11.0,
                  "y": 4.5
                }
              ]
            },
            {
              "startLaneIndex": 0,
              "endLaneIndex": 2,
              "points": [
                {
                  "x": 1.5,
                  "y": -11.0
                },
                {
                  "x": 1.249,
                  "y": -9.591
                },
                {
                  "x": 0.552,
                  "y": -7.668
                },
                {
                  "x": -0.507,
                  "y": -5.387
                },
                {
                  "x": -1.844,
                  "y": -2.904
                },
                {
                  "x": -3.375,
                  "y": -0.375
                },
                {
                  "x": -5.016,
                  "y": 2.044
                },
                {
                  "x": -6.683,
                  "y": 4.196999999999999
                },
                {
                  "x": -8.292,
                  "y": 5.927999999999999
                },
                {
                  "x": -9.759,
                  "y": 7.081
                },
                {
                  "x": -11.0,
                  "y": 7.5
                }
              ]
            }
          ]
        },
        {
          "type": "turn_right",
          "startRoad": "road_2_1_2",
          "endRoad": "road_1_1_1",
          "direction": 2,
          "laneLinks": [
            {
              "startLaneIndex": 2,
              "endLaneIndex": 0,
              "points": [
                {
                  "x": 11.0,
                  "y": 7.5
                },
                {
                  "x": 9.843,
                  "y": 7.499
                },
                {
                  "x": 8.604,
                  "y": 7.512
                },
                {
                  "x": 7.3309999999999995,
                  "y": 7.563
                },
                {
                  "x": 6.072,
                  "y": 7.676
                },
                {
                  "x": 4.875,
                  "y": 7.875
                },
                {
                  "x": 3.788,
                  "y": 8.184
                },
                {
                  "x": 2.859000000000001,
                  "y": 8.627
                },
                {
                  "x": 2.136000000000001,
                  "y": 9.228
                },
                {
                  "x": 1.6669999999999998,
                  "y": 10.011
                },
                {
                  "x": 1.5,
                  "y": 11.0
                }
              ]
            },
            {
              "startLaneIndex": 2,
              "endLaneIndex": 1,
              "points": [
                {
                  "x": 11.0,
                  "y": 7.5
                },
                {
                  "x": 9.927,
                  "y": 7.499
                },
                {
                  "x": 8.916,
                  "y": 7.512
                },
                {
                  "x": 7.979,
                  "y": 7.563
                },
                {
                  "x": 7.128,
                  "y": 7.676
                },
                {
                  "x": 6.375,
                  "y": 7.875
                },
                {
                  "x": 5.732,
                  "y": 8.184
                },
                {
                  "x": 5.211000000000001,
                  "y": 8.627
                },
                {
                  "x": 4.824000000000001,
                  "y": 9.228
                },
                {
                  "x": 4.583,
                  "y": 10.011
                },
                {
                  "x": 4.5,
                  "y": 11.0
                }
              ]
            },
            {
              "startLaneIndex": 2,
              "endLaneIndex": 2,
              "points": [
                {
                  "x": 11.0,
                  "y": 7.5
                },
                {
                  "x": 10.011,
                  "y": 7.499
                },
                {
                  "x": 9.228,
                  "y": 7.512
                },
                {
                  "x": 8.627,
                  "y": 7.563
                },
                {
                  "x": 8.184,
                  "y": 7.676
                },
                {
                  "x": 7.875,
                  "y": 7.875
                },
                {
                  "x": 7.676,
                  "y": 8.184
                },
                {
                  "x": 7.563000000000001,
                  "y": 8.627
                },
                {
                  "x": 7.512000000000001,
                  "y": 9.228
                },
                {
                  "x": 7.499,
                  "y": 10.011
                },
                {
                  "x": 7.5,
                  "y": 11.0
                }
              ]
            }
          ]
        },
        {
          "type": "go_straight",
          "startRoad": "road_2_1_2",
          "endRoad": "road_1_1_2",
          "direction": 2,
          "laneLinks": [
            {
              "startLaneIndex": 1,
              "endLaneIndex": 0,
              "points": [
                {
                  "x": 11.0,
                  "y": 4.5
                },
                {
                  "x": 9.592,
                  "y": 4.416
                },
                {
                  "x": 7.656,
                  "y": 4.188
                },
                {
                  "x": 5.324,
                  "y": 3.852
                },
                {
                  "x": 2.7279999999999998,
                  "y": 3.444
                },
                {
                  "x": 0.0,
                  "y": 3.0
                },
                {
                  "x": -2.7279999999999998,
                  "y": 2.556
                },
                {
                  "x": -5.323999999999999,
                  "y": 2.148
                },
                {
                  "x": -7.655999999999999,
                  "y": 1.811999999999999
                },
                {
                  "x": -9.592,
                  "y": 1.584
                },
                {
                  "x": -11.0,
                  "y": 1.5
                }
              ]
            },
            {
              "startLaneIndex": 1,
              "endLaneIndex": 1,
              "points": [
                {
                  "x": 11.0,
                  "y": 4.5
                },
                {
                  "x": 9.592,
                  "y": 4.5
                },
                {
                  "x": 7.656,
                  "y": 4.5
                },
                {
                  "x": 5.324,
                  "y": 4.5
                },
                {
                  "x": 2.7279999999999998,
                  "y": 4.5
                },
                {
                  "x": 0.0,
                  "y": 4.5
                },
                {
                  "x": -2.7279999999999998,
                  "y": 4.5
                },
                {
                  "x": -5.323999999999999,
                  "y": 4.5
                },
                {
                  "x": -7.655999999999999,
                  "y": 4.499999999999999
                },
                {
                  "x": -9.592,
                  "y": 4.5
                },
                {
                  "x": -11.0,
                  "y": 4.5
                }
              ]
            },
            {
              "startLaneIndex": 1,
              "endLaneIndex": 2,
              "points": [
                {
                  "x": 11.0,
                  "y": 4.5
                },
                {
                  "x": 9.592,
                  "y": 4.584
                },
                {
                  "x": 7.656,
                  "y": 4.812
                },
                {
                  "x": 5.324,
                  "y": 5.148
                },
                {
                  "x": 2.7279999999999998,
                  "y": 5.556
                },
                {
                  "x": 0.0,
                  "y": 6.0
                },
                {
                  "x": -2.7279999999999998,
                  "y": 6.444
                },
                {
                  "x": -5.323999999999999,
                  "y": 6.852
                },
                {
                  "x": -7.655999999999999,
                  "y": 7.187999999999999
                },
                {
                  "x": -9.592,
                  "y": 7.416
                },
                {
                  "x": -11.0,
                  "y": 7.5
                }
              ]
            }
          ]
        },
        {
          "type": "turn_left",
          "startRoad": "road_2_1_2",
          "endRoad": "road_1_1_3",
          "direction": 2,
          "laneLinks": [
            {
              "startLaneIndex": 0,
              "endLaneIndex": 0,
              "points": [
                {
                  "x": 11.0,
                  "y": 1.5
                },
                {
                  "x": 9.759,
                  "y": 1.249
                },
                {
                  "x": 8.292,
                  "y": 0.552
                },
                {
                  "x": 6.683,
                  "y": -0.507
                },
                {
                  "x": 5.016,
                  "y": -1.844
                },
                {
                  "x": 3.375,
                  "y": -3.375
                },
                {
                  "x": 1.844,
                  "y": -5.016
                },
                {
                  "x": 0.507000000000001,
                  "y": -6.683
                },
                {
                  "x": -0.551999999999999,
                  "y": -8.292
                },
                {
                  "x": -1.249,
                  "y": -9.759
                },
                {
                  "x": -1.5,
                  "y": -11.0
                }
              ]
            },
            {
              "startLaneIndex": 0,
              "endLaneIndex": 1,
              "points": [
                {
                  "x": 11.0,
                  "y": 1.5
                },
                {
                  "x": 9.675,
                  "y": 1.249
                },
                {
                  "x": 7.98,
                  "y": 0.552
                },
                {
                  "x": 6.035,
                  "y": -0.507
                },
                {
                  "x": 3.96,
                  "y": -1.844
                },
                {
                  "x": 1.875,
                  "y": -3.375
                },
                {
                  "x": -0.1,
                  "y": -5.016
                },
                {
                  "x": -1.844999999999999,
                  "y": -6.683
                },
                {
                  "x": -3.239999999999999,
                  "y": -8.292
                },
                {
                  "x": -4.165,
                  "y": -9.759
                },
                {
                  "x": -4.5,
                  "y": -11.0
                }
              ]
            },
            {
              "startLaneIndex": 0,
              "endLaneIndex": 2,
              "points": [
                {
                  "x": 11.0,
                  "y": 1.5
                },
                {
                  "x": 9.591,
                  "y": 1.249
                },
                {
                  "x": 7.668,
                  "y": 0.552
                },
                {
                  "x": 5.387,
                  "y": -0.507
                },
                {
                  "x": 2.904,
                  "y": -1.844
                },
                {
                  "x": 0.375,
                  "y": -3.375
                },
                {
                  "x": -2.044,
                  "y": -5.016
                },
                {
                  "x": -4.196999999999999,
                  "y": -6.683
                },
                {
                  "x": -5.927999999999999,
                  "y": -8.292
                },
                {
                  "x": -7.081,
                  "y": -9.759
                },
                {
                  "x": -7.5,
                  "y": -11.0
                }
              ]
            }
          ]
        },
        {
          "type": "turn_left",
          "startRoad": "road_1_2_3",
          "endRoad": "road_1_1_0",
          "direction": 3,
          "laneLinks": [
            {
              "startLaneIndex": 0,
              "endLaneIndex": 0,
              "points": [
                {
                  "x": -1.5,
                  "y": 11.0
                },
                {
                  "x": -1.249,
                  "y": 9.759
                },
                {
                  "x": -0.552,
                  "y": 8.292
                },
                {
                  "x": 0.507,
                  "y": 6.683
                },
                {
                  "x": 1.844,
                  "y": 5.016
                },
                {
                  "x": 3.375,
                  "y": 3.375
                },
                {
                  "x": 5.016,
                  "y": 1.844
                },
                {
                  "x": 6.683,
                  "y": 0.507000000000001
                },
                {
                  "x": 8.292,
                  "y": -0.551999999999999
                },
                {
                  "x": 9.759,
                  "y": -1.249
                },
                {
                  "x": 11.0,
                  "y": -1.5
                }
              ]
            },
            {
              "startLaneIndex": 0,
              "endLaneIndex": 1,
              "points": [
                {
                  "x": -1.5,
                  "y": 11.0
                },
                {
                  "x": -1.249,
                  "y": 9.675
                },
                {
                  "x": -0.552,
                  "y": 7.98
                },
                {
                  "x": 0.507,
                  "y": 6.035
                },
                {
                  "x": 1.844,
                  "y": 3.96
                },
                {
                  "x": 3.375,
                  "y": 1.875
                },
                {
                  "x": 5.016,
                  "y": -0.1
                },
                {
                  "x": 6.683,
                  "y": -1.844999999999999
                },
                {
                  "x": 8.292,
                  "y": -3.239999999999999
                },
                {
                  "x": 9.759,
                  "y": -4.165
                },
                {
                  "x": 11.0,
                  "y": -4.5
                }
              ]
            },
            {
              "startLaneIndex": 0,
              "endLaneIndex": 2,
              "points": [
                {
                  "x": -1.5,
                  "y": 11.0
                },
                {
                  "x": -1.249,
                  "y": 9.591
                },
                {
                  "x": -0.552,
                  "y": 7.668
                },
                {
                  "x": 0.507,
                  "y": 5.387
                },
                {
                  "x": 1.844,
                  "y": 2.904
                },
                {
                  "x": 3.375,
                  "y": 0.375
                },
                {
                  "x": 5.016,
                  "y": -2.044
                },
                {
                  "x": 6.683,
                  "y": -4.196999999999999
                },
                {
                  "x": 8.292,
                  "y": -5.927999999999999
                },
                {
                  "x": 9.759,
                  "y": -7.081
                },
                {
                  "x": 11.0,
                  "y": -7.5
                }
              ]
            }
          ]
        },
        {
          "type": "turn_right",
          "startRoad": "road_1_2_3",
          "endRoad": "road_1_1_2",
          "direction": 3,
          "laneLinks": [
            {
              "startLaneIndex": 2,
              "endLaneIndex": 0,
              "points": [
                {
                  "x": -7.5,
                  "y": 11.0
                },
                {
                  "x": -7.499,
                  "y": 9.843
                },
                {
                  "x": -7.512,
                  "y": 8.604
                },
                {
                  "x": -7.563,
                  "y": 7.3309999999999995
                },
                {
                  "x": -7.676,
                  "y": 6.072
                },
                {
                  "x": -7.875,
                  "y": 4.875
                },
                {
                  "x": -8.184,
                  "y": 3.788
                },
                {
                  "x": -8.627,
                  "y": 2.859000000000001
                },
                {
                  "x": -9.228,
                  "y": 2.136000000000001
                },
                {
                  "x": -10.011,
                  "y": 1.6669999999999998
                },
                {
                  "x": -11.0,
                  "y": 1.5
                }
              ]
            },
            {
              "startLaneIndex": 2,
              "endLaneIndex": 1,
              "points": [
                {
                  "x": -7.5,
                  "y": 11.0
                },
                {
                  "x": -7.499,
                  "y": 9.927
                },
                {
                  "x": -7.512,
                  "y": 8.916
                },
                {
                  "x": -7.563,
                  "y": 7.979
                },
                {
                  "x": -7.676,
                  "y": 7.128
                },
                {
                  "x": -7.875,
                  "y": 6.375
                },
                {
                  "x": -8.184,
                  "y": 5.732
                },
                {
                  "x": -8.627,
                  "y": 5.211000000000001
                },
                {
                  "x": -9.228,
                  "y": 4.824000000000001
                },
                {
                  "x": -10.011,
                  "y": 4.583
                },
                {
                  "x": -11.0,
                  "y": 4.5
                }
              ]
            },
            {
              "startLaneIndex": 2,
              "endLaneIndex": 2,
              "points": [
                {
                  "x": -7.5,
                  "y": 11.0
                },
                {
                  "x": -7.499,
                  "y": 10.011
                },
                {
                  "x": -7.512,
                  "y": 9.228
                },
                {
                  "x": -7.563,
                  "y": 8.627
                },
                {
                  "x": -7.676,
                  "y": 8.184
                },
                {
                  "x": -7.875,
                  "y": 7.875
                },
                {
                  "x": -8.184,
                  "y": 7.676
                },
                {
                  "x": -8.627,
                  "y": 7.563000000000001
                },
                {
                  "x": -9.228,
                  "y": 7.512000000000001
                },
                {
                  "x": -10.011,
                  "y": 7.499
                },
                {
                  "x": -11.0,
                  "y": 7.5
                }
              ]
            }
          ]
        },
        {
          "type": "go_straight",
          "startRoad": "road_1_2_3",
          "endRoad": "road_1_1_3",
          "direction": 3,
          "laneLinks": [
            {
              "startLaneIndex": 1,
              "endLaneIndex": 0,
              "points": [
                {
                  "x": -4.5,
                  "y": 11.0
                },
                {
                  "x": -4.416,
                  "y": 9.592
                },
                {
                  "x": -4.188,
                  "y": 7.656
                },
                {
                  "x": -3.852,
                  "y": 5.324
                },
                {
                  "x": -3.444,
                  "y": 2.7279999999999998
                },
                {
                  "x": -3.0,
                  "y": 0.0
                },
                {
                  "x": -2.556,
                  "y": -2.7279999999999998
                },
                {
                  "x": -2.148,
                  "y": -5.323999999999999
                },
                {
                  "x": -1.811999999999999,
                  "y": -7.655999999999999
                },
                {
                  "x": -1.584,
                  "y": -9.592
                },
                {
                  "x": -1.5,
                  "y": -11.0
                }
              ]
            },
            {
              "startLaneIndex": 1,
              "endLaneIndex": 1,
              "points": [
                {
                  "x": -4.5,
                  "y": 11.0
                },
                {
                  "x": -4.5,
                  "y": 9.592
                },
                {
                  "x": -4.5,
                  "y": 7.656
                },
                {
                  "x": -4.5,
                  "y": 5.324
                },
                {
                  "x": -4.5,
                  "y": 2.7279999999999998
                },
                {
                  "x": -4.5,
                  "y": 0.0
                },
                {
                  "x": -4.5,
                  "y": -2.7279999999999998
                },
                {
                  "x": -4.5,
                  "y": -5.323999999999999
                },
                {
                  "x": -4.499999999999999,
                  "y": -7.655999999999999
                },
                {
                  "x": -4.5,
                  "y": -9.592
                },
                {
                  "x": -4.5,
                  "y": -11.0
                }
              ]
            },
            {
              "startLaneIndex": 1,
              "endLaneIndex": 2,
              "points": [
                {
                  "x": -4.5,
                  "y": 11.0
                },
                {
                  "x": -4.584,
                  "y": 9.592
                },
                {
                  "x": -4.812,
                  "y": 7.656
                },
                {
                  "x": -5.148,
                  "y": 5.324
                },
                {
                  "x": -5.556,
                  "y": 2.7279999999999998
                },
                {
                  "x": -6.0,
                  "y": 0.0
                },
                {
                  "x": -6.444,
                  "y": -2.7279999999999998
                },
                {
                  "x": -6.852,
                  "y": -5.323999999999999
                },
                {
                  "x": -7.187999999999999,
                  "y": -7.655999999999999
                },
                {
                  "x": -7.416,
                  "y": -9.592
                },
                {
                  "x": -7.5,
                  "y": -11.0
                }
              ]
            }
          ]
        }
      ],
      "trafficLight": {
        "roadLinkIndices": [
          0,
          1,
          2,
          3,
          4,
          5,
          6,
          7,
          8,
          9,
          10,
          11
        ],
        "lightphases": [
          {
            "time": 5,
            "availableRoadLinks": [
              10,
              2,
              3,
              6
            ]
          },
          {
            "time": 30,
            "availableRoadLinks": [
              0,
              2,
              3,
              6,
              7,
              10
            ]
          },
          {
            "time": 30,
            "availableRoadLinks": [
              2,
              3,
              4,
              6,
              10,
              11
            ]
          },
          {
            "time": 30,
            "availableRoadLinks": [
              1,
              2,
              3,
              6,
              8,
              10
            ]
          },
          {
            "time": 30,
            "availableRoadLinks": [
              2,
              3,
              5,
              6,
              9,
              10
            ]
          },
          {
            "time": 30,
            "availableRoadLinks": [
              0,
              1,
              2,
              3,
              6,
              10
            ]
          },
          {
            "time": 30,
            "availableRoadLinks": [
              2,
              3,
              6,
              7,
              8,
              10
            ]
          },
          {
            "time": 30,
            "availableRoadLinks": [
              2,
              3,
              4,
              5,
              6,
              10
            ]
          },
          {
            "time": 30,
            "availableRoadLinks": [
              2,
              3,
              6,
              9,
              10,
              11
            ]
          }
        ]
      },
      "virtual": false
    },
    {
      "id": "intersection_1_2",
      "point": {
        "x": 0,
        "y": 300
      },
      "width": 11,
      "roads": [
        "road_0_2_0",
        "road_1_1_1",
        "road_2_2_2",
        "road_1_3_3",
        "road_1_2_0",
        "road_1_2_1",
        "road_1_2_2",
        "road_1_2_3"
      ],
      "roadLinks": [
        {
          "type": "go_straight",
          "startRoad": "road_0_2_0",
          "endRoad": "road_1_2_0",
          "direction": 0,
          "laneLinks": [
            {
              "startLaneIndex": 1,
              "endLaneIndex": 0,
              "points": [
                {
                  "x": -11.0,
                  "y": 295.5
                },
                {
                  "x": -9.592,
                  "y": 295.584
                },
                {
                  "x": -7.656,
                  "y": 295.812
                },
                {
                  "x": -5.324,
                  "y": 296.148
                },
                {
                  "x": -2.7279999999999998,
                  "y": 296.556
                },
                {
                  "x": 0.0,
                  "y": 297.0
                },
                {
                  "x": 2.7279999999999998,
                  "y": 297.444
                },
                {
                  "x": 5.323999999999999,
                  "y": 297.852
                },
                {
                  "x": 7.655999999999999,
                  "y": 298.188
                },
                {
                  "x": 9.592,
                  "y": 298.416
                },
                {
                  "x": 11.0,
                  "y": 298.5
                }
              ]
            },
            {
              "startLaneIndex": 1,
              "endLaneIndex": 1,
              "points": [
                {
                  "x": -11.0,
                  "y": 295.5
                },
                {
                  "x": -9.592,
                  "y": 295.5
                },
                {
                  "x": -7.656,
                  "y": 295.5
                },
                {
                  "x": -5.324,
                  "y": 295.5
                },
                {
                  "x": -2.7279999999999998,
                  "y": 295.5
                },
                {
                  "x": 0.0,
                  "y": 295.5
                },
                {
                  "x": 2.7279999999999998,
                  "y": 295.5
                },
                {
                  "x": 5.323999999999999,
                  "y": 295.5
                },
                {
                  "x": 7.655999999999999,
                  "y": 295.5
                },
                {
                  "x": 9.592,
                  "y": 295.5
                },
                {
                  "x": 11.0,
                  "y": 295.5
                }
              ]
            },
            {
              "startLaneIndex": 1,
              "endLaneIndex": 2,
              "points": [
                {
                  "x": -11.0,
                  "y": 295.5
                },
                {
                  "x": -9.592,
                  "y": 295.416
                },
                {
                  "x": -7.656,
                  "y": 295.188
                },
                {
                  "x": -5.324,
                  "y": 294.852
                },
                {
                  "x": -2.7279999999999998,
                  "y": 294.444
                },
                {
                  "x": 0.0,
                  "y": 294.0
                },
                {
                  "x": 2.7279999999999998,
                  "y": 293.556
                },
                {
                  "x": 5.323999999999999,
                  "y": 293.148
                },
                {
                  "x": 7.655999999999999,
                  "y": 292.812
                },
                {
                  "x": 9.592,
                  "y": 292.584
                },
                {
                  "x": 11.0,
                  "y": 292.5
                }
              ]
            }
          ]
        },
        {
          "type": "turn_left",
          "startRoad": "road_0_2_0",
          "endRoad": "road_1_2_1",
          "direction": 0,
          "laneLinks": [
            {
              "startLaneIndex": 0,
              "endLaneIndex": 0,
              "points": [
                {
                  "x": -11.0,
                  "y": 298.5
                },
                {
                  "x": -9.759,
                  "y": 298.751
                },
                {
                  "x": -8.292,
                  "y": 299.448
                },
                {
                  "x": -6.683,
                  "y": 300.507
                },
                {
                  "x": -5.016,
                  "y": 301.844
                },
                {
                  "x": -3.375,
                  "y": 303.375
                },
                {
                  "x": -1.844,
                  "y": 305.016
                },
                {
                  "x": -0.507000000000001,
                  "y": 306.683
                },
                {
                  "x": 0.551999999999999,
                  "y": 308.292
                },
                {
                  "x": 1.249,
                  "y": 309.759
                },
                {
                  "x": 1.5,
                  "y": 311.0
                }
              ]
            },
            {
              "startLaneIndex": 0,
              "endLaneIndex": 1,
              "points": [
                {
                  "x": -11.0,
                  "y": 298.5
                },
                {
                  "x": -9.675,
                  "y": 298.751
                },
                {
                  "x": -7.98,
                  "y": 299.448
                },
                {
                  "x": -6.035,
                  "y": 300.507
                },
                {
                  "x": -3.96,
                  "y": 301.844
                },
                {
                  "x": -1.875,
                  "y": 303.375
                },
                {
                  "x": 0.1,
                  "y": 305.016
                },
                {
                  "x": 1.844999999999999,
                  "y": 306.683
                },
                {
                  "x": 3.239999999999999,
                  "y": 308.292
                },
                {
                  "x": 4.165,
                  "y": 309.759
                },
                {
                  "x": 4.5,
                  "y": 311.0
                }
              ]
            },
            {
              "startLaneIndex": 0,
              "endLaneIndex": 2,
              "points": [
                {
                  "x": -11.0,
                  "y": 298.5
                },
                {
                  "x": -9.591,
                  "y": 298.751
                },
                {
                  "x": -7.668,
                  "y": 299.448
                },
                {
                  "x": -5.387,
                  "y": 300.507
                },
                {
                  "x": -2.904,
                  "y": 301.844
                },
                {
                  "x": -0.375,
                  "y": 303.375
                },
                {
                  "x": 2.044,
                  "y": 305.016
                },
                {
                  "x": 4.196999999999999,
                  "y": 306.683
                },
                {
                  "x": 5.927999999999999,
                  "y": 308.292
                },
                {
                  "x": 7.081,
                  "y": 309.759
                },
                {
                  "x": 7.5,
                  "y": 311.0
                }
              ]
            }
          ]
        },
        {
          "type": "turn_right",
          "startRoad": "road_0_2_0",
          "endRoad": "road_1_2_3",
          "direction": 0,
          "laneLinks": [
            {
              "startLaneIndex": 2,
              "endLaneIndex": 0,
              "points": [
                {
                  "x": -11.0,
                  "y": 292.5
                },
                {
                  "x": -9.843,
                  "y": 292.501
                },
                {
                  "x": -8.604,
                  "y": 292.488
                },
                {
                  "x": -7.3309999999999995,
                  "y": 292.437
                },
                {
                  "x": -6.072,
                  "y": 292.324
                },
                {
                  "x": -4.875,
                  "y": 292.125
                },
                {
                  "x": -3.788,
                  "y": 291.816
                },
                {
                  "x": -2.859000000000001,
                  "y": 291.373
                },
                {
                  "x": -2.136000000000001,
                  "y": 290.772
                },
                {
                  "x": -1.6669999999999998,
                  "y": 289.98900000000003
                },
                {
                  "x": -1.5,
                  "y": 289.0
                }
              ]
            },
            {
              "startLaneIndex": 2,
              "endLaneIndex": 1,
              "points": [
                {
                  "x": -11.0,
                  "y": 292.5
                },
                {
                  "x": -9.927,
                  "y": 292.501
                },
                {
                  "x": -8.916,
                  "y": 292.488
                },
                {
                  "x": -7.979,
                  "y": 292.437
                },
                {
                  "x": -7.128,
                  "y": 292.324
                },
                {
                  "x": -6.375,
                  "y": 292.125
                },
                {
                  "x": -5.732,
                  "y": 291.816
                },
                {
                  "x": -5.211000000000001,
                  "y": 291.373
                },
                {
                  "x": -4.824000000000001,
                  "y": 290.772
                },
                {
                  "x": -4.583,
                  "y": 289.98900000000003
                },
                {
                  "x": -4.5,
                  "y": 289.0
                }
              ]
            },
            {
              "startLaneIndex": 2,
              "endLaneIndex": 2,
              "points": [
                {
                  "x": -11.0,
                  "y": 292.5
                },
                {
                  "x": -10.011,
                  "y": 292.501
                },
                {
                  "x": -9.228,
                  "y": 292.488
                },
                {
                  "x": -8.627,
                  "y": 292.437
                },
                {
                  "x": -8.184,
                  "y": 292.324
                },
                {
                  "x": -7.875,
                  "y": 292.125
                },
                {
                  "x": -7.676,
                  "y": 291.816
                },
                {
                  "x": -7.563000000000001,
                  "y": 291.373
                },
                {
                  "x": -7.512000000000001,
                  "y": 290.772
                },
                {
                  "x": -7.499,
                  "y": 289.98900000000003
                },
                {
                  "x": -7.5,
                  "y": 289.0
                }
              ]
            }
          ]
        },
        {
          "type": "turn_right",
          "startRoad": "road_1_1_1",
          "endRoad": "road_1_2_0",
          "direction": 1,
          "laneLinks": [
            {
              "startLaneIndex": 2,
              "endLaneIndex": 0,
              "points": [
                {
                  "x": 7.5,
                  "y": 289.0
                },
                {
                  "x": 7.499,
                  "y": 290.157
                },
                {
                  "x": 7.512,
                  "y": 291.396
                },
                {
                  "x": 7.563,
                  "y": 292.669
                },
                {
                  "x": 7.676,
                  "y": 293.928
                },
                {
                  "x": 7.875,
                  "y": 295.125
                },
                {
                  "x": 8.184,
                  "y": 296.212
                },
                {
                  "x": 8.627,
                  "y": 297.141
                },
                {
                  "x": 9.228,
                  "y": 297.864
                },
                {
                  "x": 10.011,
                  "y": 298.333
                },
                {
                  "x": 11.0,
                  "y": 298.5
                }
              ]
            },
            {
              "startLaneIndex": 2,
              "endLaneIndex": 1,
              "points": [
                {
                  "x": 7.5,
                  "y": 289.0
                },
                {
                  "x": 7.499,
                  "y": 290.073
                },
                {
                  "x": 7.512,
                  "y": 291.084
                },
                {
                  "x": 7.563,
                  "y": 292.021
                },
                {
                  "x": 7.676,
                  "y": 292.872
                },
                {
                  "x": 7.875,
                  "y": 293.625
                },
                {
                  "x": 8.184,
                  "y": 294.268
                },
                {
                  "x": 8.627,
                  "y": 294.789
                },
                {
                  "x": 9.228,
                  "y": 295.176
                },
                {
                  "x": 10.011,
                  "y": 295.41700000000003
                },
                {
                  "x": 11.0,
                  "y": 295.5
                }
              ]
            },
            {
              "startLaneIndex": 2,
              "endLaneIndex": 2,
              "points": [
                {
                  "x": 7.5,
                  "y": 289.0
                },
                {
                  "x": 7.499,
                  "y": 289.989
                },
                {
                  "x": 7.512,
                  "y": 290.772
                },
                {
                  "x": 7.563,
                  "y": 291.373
                },
                {
                  "x": 7.676,
                  "y": 291.816
                },
                {
                  "x": 7.875,
                  "y": 292.125
                },
                {
                  "x": 8.184,
                  "y": 292.324
                },
                {
                  "x": 8.627,
                  "y": 292.437
                },
                {
                  "x": 9.228,
                  "y": 292.488
                },
                {
                  "x": 10.011,
                  "y": 292.50100000000003
                },
                {
                  "x": 11.0,
                  "y": 292.5
                }
              ]
            }
          ]
        },
        {
          "type": "go_straight",
          "startRoad": "road_1_1_1",
          "endRoad": "road_1_2_1",
          "direction": 1,
          "laneLinks": [
            {
              "startLaneIndex": 1,
              "endLaneIndex": 0,
              "points": [
                {
                  "x": 4.5,
                  "y": 289.0
                },
                {
                  "x": 4.416,
                  "y": 290.408
                },
                {
                  "x": 4.188,
                  "y": 292.344
                },
                {
                  "x": 3.852,
                  "y": 294.676
                },
                {
                  "x": 3.444,
                  "y": 297.272
                },
                {
                  "x": 3.0,
                  "y": 300.0
                },
                {
                  "x": 2.556,
                  "y": 302.728
                },
                {
                  "x": 2.148,
                  "y": 305.324
                },
                {
                  "x": 1.811999999999999,
                  "y": 307.656
                },
                {
                  "x": 1.584,
                  "y": 309.592
                },
                {
                  "x": 1.5,
                  "y": 311.0
                }
              ]
            },
            {
              "startLaneIndex": 1,
              "endLaneIndex": 1,
              "points": [
                {
                  "x": 4.5,
                  "y": 289.0
                },
                {
                  "x": 4.5,
                  "y": 290.408
                },
                {
                  "x": 4.5,
                  "y": 292.344
                },
                {
                  "x": 4.5,
                  "y": 294.676
                },
                {
                  "x": 4.5,
                  "y": 297.272
                },
                {
                  "x": 4.5,
                  "y": 300.0
                },
                {
                  "x": 4.5,
                  "y": 302.728
                },
                {
                  "x": 4.5,
                  "y": 305.324
                },
                {
                  "x": 4.499999999999999,
                  "y": 307.656
                },
                {
                  "x": 4.5,
                  "y": 309.592
                },
                {
                  "x": 4.5,
                  "y": 311.0
                }
              ]
            },
            {
              "startLaneIndex": 1,
              "endLaneIndex": 2,
              "points": [
                {
                  "x": 4.5,
                  "y": 289.0
                },
                {
                  "x": 4.584,
                  "y": 290.408
                },
                {
                  "x": 4.812,
                  "y": 292.344
                },
                {
                  "x": 5.148,
                  "y": 294.676
                },
                {
                  "x": 5.556,
                  "y": 297.272
                },
                {
                  "x": 6.0,
                  "y": 300.0
                },
                {
                  "x": 6.444,
                  "y": 302.728
                },
                {
                  "x": 6.852,
                  "y": 305.324
                },
                {
                  "x": 7.187999999999999,
                  "y": 307.656
                },
                {
                  "x": 7.416,
                  "y": 309.592
                },
                {
                  "x": 7.5,
                  "y": 311.0
                }
              ]
            }
          ]
        },
        {
          "type": "turn_left",
          "startRoad": "road_1_1_1",
          "endRoad": "road_1_2_2",
          "direction": 1,
          "laneLinks": [
            {
              "startLaneIndex": 0,
              "endLaneIndex": 0,
              "points": [
                {
                  "x": 1.5,
                  "y": 289.0
                },
                {
                  "x": 1.249,
                  "y": 290.241
                },
                {
                  "x": 0.552,
                  "y": 291.70799999999997
                },
                {
                  "x": -0.507,
                  "y": 293.317
                },
                {
                  "x": -1.844,
                  "y": 294.984
                },
                {
                  "x": -3.375,
                  "y": 296.625
                },
                {
                  "x": -5.016,
                  "y": 298.156
                },
                {
                  "x": -6.683,
                  "y": 299.493
                },
                {
                  "x": -8.292,
                  "y": 300.552
                },
                {
                  "x": -9.759,
                  "y": 301.249
                },
                {
                  "x": -11.0,
                  "y": 301.5
                }
              ]
            },
            {
              "startLaneIndex": 0,
              "endLaneIndex": 1,
              "points": [
                {
                  "x": 1.5,
                  "y": 289.0
                },
                {
                  "x": 1.249,
                  "y": 290.325
                },
                {
                  "x": 0.552,
                  "y": 292.02
                },
                {
                  "x": -0.507,
                  "y": 293.965
                },
                {
                  "x": -1.844,
                  "y": 296.04
                },
                {
                  "x": -3.375,
                  "y": 298.125
                },
                {
                  "x": -5.016,
                  "y": 300.1
                },
                {
                  "x": -6.683,
                  "y": 301.845
                },
                {
                  "x": -8.292,
                  "y": 303.24
                },
                {
                  "x": -9.759,
                  "y": 304.165
                },
                {
                  "x": -11.0,
                  "y": 304.5
                }
              ]
            },
            {
              "startLaneIndex": 0,
              "endLaneIndex": 2,
              "points": [
                {
                  "x": 1.5,
                  "y": 289.0
                },
                {
                  "x": 1.249,
                  "y": 290.409
                },
                {
                  "x": 0.552,
                  "y": 292.332
                },
                {
                  "x": -0.507,
                  "y": 294.613
                },
                {
                  "x": -1.844,
                  "y": 297.096
                },
                {
                  "x": -3.375,
                  "y": 299.625
                },
                {
                  "x": -5.016,
                  "y": 302.044
                },
                {
                  "x": -6.683,
                  "y": 304.197
                },
                {
                  "x": -8.292,
                  "y": 305.928
                },
                {
                  "x": -9.759,
                  "y": 307.081
                },
                {
                  "x": -11.0,
                  "y": 307.5
                }
              ]
            }
          ]
        },
        {
          "type": "turn_right",
          "startRoad": "road_2_2_2",
          "endRoad": "road_1_2_1",
          "direction": 2,
          "laneLinks": [
            {
              "startLaneIndex": 2,
              "endLaneIndex": 0,
              "points": [
                {
                  "x": 11.0,
                  "y": 307.5
                },
                {
                  "x": 9.843,
                  "y": 307.499
                },
                {
                  "x": 8.604,
                  "y": 307.512
                },
                {
                  "x": 7.3309999999999995,
                  "y": 307.563
                },
                {
                  "x": 6.072,
                  "y": 307.676
                },
                {
                  "x": 4.875,
                  "y": 307.875
                },
                {
                  "x": 3.788,
                  "y": 308.18399999999997
                },
                {
                  "x": 2.859000000000001,
                  "y": 308.627
                },
                {
                  "x": 2.136000000000001,
                  "y": 309.228
                },
                {
                  "x": 1.6669999999999998,
                  "y": 310.011
                },
                {
                  "x": 1.5,
                  "y": 311.0
                }
              ]
            },
            {
              "startLaneIndex": 2,
              "endLaneIndex": 1,
              "points": [
                {
                  "x": 11.0,
                  "y": 307.5
                },
                {
                  "x": 9.927,
                  "y": 307.499
                },
                {
                  "x": 8.916,
                  "y": 307.512
                },
                {
                  "x": 7.979,
                  "y": 307.563
                },
                {
                  "x": 7.128,
                  "y": 307.676
                },
                {
                  "x": 6.375,
                  "y": 307.875
                },
                {
                  "x": 5.732,
                  "y": 308.18399999999997
                },
                {
                  "x": 5.211000000000001,
                  "y": 308.627
                },
                {
                  "x": 4.824000000000001,
                  "y": 309.228
                },
                {
                  "x": 4.583,
                  "y": 310.011
                },
                {
                  "x": 4.5,
                  "y": 311.0
                }
              ]
            },
            {
              "startLaneIndex": 2,
              "endLaneIndex": 2,
              "points": [
                {
                  "x": 11.0,
                  "y": 307.5
                },
                {
                  "x": 10.011,
                  "y": 307.499
                },
                {
                  "x": 9.228,
                  "y": 307.512
                },
                {
                  "x": 8.627,
                  "y": 307.563
                },
                {
                  "x": 8.184,
                  "y": 307.676
                },
                {
                  "x": 7.875,
                  "y": 307.875
                },
                {
                  "x": 7.676,
                  "y": 308.18399999999997
                },
                {
                  "x": 7.563000000000001,
                  "y": 308.627
                },
                {
                  "x": 7.512000000000001,
                  "y": 309.228
                },
                {
                  "x": 7.499,
                  "y": 310.011
                },
                {
                  "x": 7.5,
                  "y": 311.0
                }
              ]
            }
          ]
        },
        {
          "type": "go_straight",
          "startRoad": "road_2_2_2",
          "endRoad": "road_1_2_2",
          "direction": 2,
          "laneLinks": [
            {
              "startLaneIndex": 1,
              "endLaneIndex": 0,
              "points": [
                {
                  "x": 11.0,
                  "y": 304.5
                },
                {
                  "x": 9.592,
                  "y": 304.416
                },
                {
                  "x": 7.656,
                  "y": 304.188
                },
                {
                  "x": 5.324,
                  "y": 303.852
                },
                {
                  "x": 2.7279999999999998,
                  "y": 303.444
                },
                {
                  "x": 0.0,
                  "y": 303.0
                },
                {
                  "x": -2.7279999999999998,
                  "y": 302.556
                },
                {
                  "x": -5.323999999999999,
                  "y": 302.148
                },
                {
                  "x": -7.655999999999999,
                  "y": 301.812
                },
                {
                  "x": -9.592,
                  "y": 301.584
                },
                {
                  "x": -11.0,
                  "y": 301.5
                }
              ]
            },
            {
              "startLaneIndex": 1,
              "endLaneIndex": 1,
              "points": [
                {
                  "x": 11.0,
                  "y": 304.5
                },
                {
                  "x": 9.592,
                  "y": 304.5
                },
                {
                  "x": 7.656,
                  "y": 304.5
                },
                {
                  "x": 5.324,
                  "y": 304.5
                },
                {
                  "x": 2.7279999999999998,
                  "y": 304.5
                },
                {
                  "x": 0.0,
                  "y": 304.5
                },
                {
                  "x": -2.7279999999999998,
                  "y": 304.5
                },
                {
                  "x": -5.323999999999999,
                  "y": 304.5
                },
                {
                  "x": -7.655999999999999,
                  "y": 304.5
                },
                {
                  "x": -9.592,
                  "y": 304.5
                },
                {
                  "x": -11.0,
                  "y": 304.5
                }
              ]
            },
            {
              "startLaneIndex": 1,
              "endLaneIndex": 2,
              "points": [
                {
                  "x": 11.0,
                  "y": 304.5
                },
                {
                  "x": 9.592,
                  "y": 304.584
                },
                {
                  "x": 7.656,
                  "y": 304.812
                },
                {
                  "x": 5.324,
                  "y": 305.148
                },
                {
                  "x": 2.7279999999999998,
                  "y": 305.556
                },
                {
                  "x": 0.0,
                  "y": 306.0
                },
                {
                  "x": -2.7279999999999998,
                  "y": 306.444
                },
                {
                  "x": -5.323999999999999,
                  "y": 306.852
                },
                {
                  "x": -7.655999999999999,
                  "y": 307.188
                },
                {
                  "x": -9.592,
                  "y": 307.416
                },
                {
                  "x": -11.0,
                  "y": 307.5
                }
              ]
            }
          ]
        },
        {
          "type": "turn_left",
          "startRoad": "road_2_2_2",
          "endRoad": "road_1_2_3",
          "direction": 2,
          "laneLinks": [
            {
              "startLaneIndex": 0,
              "endLaneIndex": 0,
              "points": [
                {
                  "x": 11.0,
                  "y": 301.5
                },
                {
                  "x": 9.759,
                  "y": 301.249
                },
                {
                  "x": 8.292,
                  "y": 300.552
                },
                {
                  "x": 6.683,
                  "y": 299.493
                },
                {
                  "x": 5.016,
                  "y": 298.156
                },
                {
                  "x": 3.375,
                  "y": 296.625
                },
                {
                  "x": 1.844,
                  "y": 294.984
                },
                {
                  "x": 0.507000000000001,
                  "y": 293.317
                },
                {
                  "x": -0.551999999999999,
                  "y": 291.70799999999997
                },
                {
                  "x": -1.249,
                  "y": 290.241
                },
                {
                  "x": -1.5,
                  "y": 289.0
                }
              ]
            },
            {
              "startLaneIndex": 0,
              "endLaneIndex": 1,
              "points": [
                {
                  "x": 11.0,
                  "y": 301.5
                },
                {
                  "x": 9.675,
                  "y": 301.249
                },
                {
                  "x": 7.98,
                  "y": 300.552
                },
                {
                  "x": 6.035,
                  "y": 299.493
                },
                {
                  "x": 3.96,
                  "y": 298.156
                },
                {
                  "x": 1.875,
                  "y": 296.625
                },
                {
                  "x": -0.1,
                  "y": 294.984
                },
                {
                  "x": -1.844999999999999,
                  "y": 293.317
                },
                {
                  "x": -3.239999999999999,
                  "y": 291.70799999999997
                },
                {
                  "x": -4.165,
                  "y": 290.241
                },
                {
                  "x": -4.5,
                  "y": 289.0
                }
              ]
            },
            {
              "startLaneIndex": 0,
              "endLaneIndex": 2,
              "points": [
                {
                  "x": 11.0,
                  "y": 301.5
                },
                {
                  "x": 9.591,
                  "y": 301.249
                },
                {
                  "x": 7.668,
                  "y": 300.552
                },
                {
                  "x": 5.387,
                  "y": 299.493
                },
                {
                  "x": 2.904,
                  "y": 298.156
                },
                {
                  "x": 0.375,
                  "y": 296.625
                },
                {
                  "x": -2.044,
                  "y": 294.984
                },
                {
                  "x": -4.196999999999999,
                  "y": 293.317
                },
                {
                  "x": -5.927999999999999,
                  "y": 291.70799999999997
                },
                {
                  "x": -7.081,
                  "y": 290.241
                },
                {
                  "x": -7.5,
                  "y": 289.0
                }
              ]
            }
          ]
        },
        {
          "type": "turn_left",
          "startRoad": "road_1_3_3",
          "endRoad": "road_1_2_0",
          "direction": 3,
          "laneLinks": [
            {
              "startLaneIndex": 0,
              "endLaneIndex": 0,
              "points": [
                {
                  "x": -1.5,
                  "y": 311.0
                },
                {
                  "x": -1.249,
                  "y": 309.759
                },
                {
                  "x": -0.552,
                  "y": 308.292
                },
                {
                  "x": 0.507,
                  "y": 306.683
                },
                {
                  "x": 1.844,
                  "y": 305.016
                },
                {
                  "x": 3.375,
                  "y": 303.375
                },
                {
                  "x": 5.016,
                  "y": 301.844
                },
                {
                  "x": 6.683,
                  "y": 300.507
                },
                {
                  "x": 8.292,
                  "y": 299.448
                },
                {
                  "x": 9.759,
                  "y": 298.75100000000003
                },
                {
                  "x": 11.0,
                  "y": 298.5
                }
              ]
            },
            {
              "startLaneIndex": 0,
              "endLaneIndex": 1,
              "points": [
                {
                  "x": -1.5,
                  "y": 311.0
                },
                {
                  "x": -1.249,
                  "y": 309.675
                },
                {
                  "x": -0.552,
                  "y": 307.98
                },
                {
                  "x": 0.507,
                  "y": 306.03499999999997
                },
                {
                  "x": 1.844,
                  "y": 303.96
                },
                {
                  "x": 3.375,
                  "y": 301.875
                },
                {
                  "x": 5.016,
                  "y": 299.9
                },
                {
                  "x": 6.683,
                  "y": 298.155
                },
                {
                  "x": 8.292,
                  "y": 296.76
                },
                {
                  "x": 9.759,
                  "y": 295.83500000000004
                },
                {
                  "x": 11.0,
                  "y": 295.5
                }
              ]
            },
            {
              "startLaneIndex": 0,
              "endLaneIndex": 2,
              "points": [
                {
                  "x": -1.5,
                  "y": 311.0
                },
                {
                  "x": -1.249,
                  "y": 309.591
                },
                {
                  "x": -0.552,
                  "y": 307.668
                },
                {
                  "x": 0.507,
                  "y": 305.387
                },
                {
                  "x": 1.844,
                  "y": 302.904
                },
                {
                  "x": 3.375,
                  "y": 300.375
                },
                {
                  "x": 5.016,
                  "y": 297.956
                },
                {
                  "x": 6.683,
                  "y": 295.803
                },
                {
                  "x": 8.292,
                  "y": 294.072
                },
                {
                  "x": 9.759,
                  "y": 292.919
                },
                {
                  "x": 11.0,
                  "y": 292.5
                }
              ]
            }
          ]
        },
        {
          "type": "turn_right",
          "startRoad": "road_1_3_3",
          "endRoad": "road_1_2_2",
          "direction": 3,
          "laneLinks": [
            {
              "startLaneIndex": 2,
              "endLaneIndex": 0,
              "points": [
                {
                  "x": -7.5,
                  "y": 311.0
                },
                {
                  "x": -7.499,
                  "y": 309.843
                },
                {
                  "x": -7.512,
                  "y": 308.604
                },
                {
                  "x": -7.563,
                  "y": 307.331
                },
                {
                  "x": -7.676,
                  "y": 306.072
                },
                {
                  "x": -7.875,
                  "y": 304.875
                },
                {
                  "x": -8.184,
                  "y": 303.788
                },
                {
                  "x": -8.627,
                  "y": 302.859
                },
                {
                  "x": -9.228,
                  "y": 302.136
                },
                {
                  "x": -10.011,
                  "y": 301.66700000000003
                },
                {
                  "x": -11.0,
                  "y": 301.5
                }
              ]
            },
            {
              "startLaneIndex": 2,
              "endLaneIndex": 1,
              "points": [
                {
                  "x": -7.5,
                  "y": 311.0
                },
                {
                  "x": -7.499,
                  "y": 309.927
                },
                {
                  "x": -7.512,
                  "y": 308.916
                },
                {
                  "x": -7.563,
                  "y": 307.979
                },
                {
                  "x": -7.676,
                  "y": 307.128
                },
                {
                  "x": -7.875,
                  "y": 306.375
                },
                {
                  "x": -8.184,
                  "y": 305.73199999999997
                },
                {
                  "x": -8.627,
                  "y": 305.211
                },
                {
                  "x": -9.228,
                  "y": 304.824
                },
                {
                  "x": -10.011,
                  "y": 304.583
                },
                {
                  "x": -11.0,
                  "y": 304.5
                }
              ]
            },
            {
              "startLaneIndex": 2,
              "endLaneIndex": 2,
              "points": [
                {
                  "x": -7.5,
                  "y": 311.0
                },
                {
                  "x": -7.499,
                  "y": 310.011
                },
                {
                  "x": -7.512,
                  "y": 309.228
                },
                {
                  "x": -7.563,
                  "y": 308.627
                },
                {
                  "x": -7.676,
                  "y": 308.18399999999997
                },
                {
                  "x": -7.875,
                  "y": 307.875
                },
                {
                  "x": -8.184,
                  "y": 307.676
                },
                {
                  "x": -8.627,
                  "y": 307.563
                },
                {
                  "x": -9.228,
                  "y": 307.512
                },
                {
                  "x": -10.011,
                  "y": 307.499
                },
                {
                  "x": -11.0,
                  "y": 307.5
                }
              ]
            }
          ]
        },
        {
          "type": "go_straight",
          "startRoad": "road_1_3_3",
          "endRoad": "road_1_2_3",
          "direction": 3,
          "laneLinks": [
            {
              "startLaneIndex": 1,
              "endLaneIndex": 0,
              "points": [
                {
                  "x": -4.5,
                  "y": 311.0
                },
                {
                  "x": -4.416,
                  "y": 309.592
                },
                {
                  "x": -4.188,
                  "y": 307.656
                },
                {
                  "x": -3.852,
                  "y": 305.324
                },
                {
                  "x": -3.444,
                  "y": 302.728
                },
                {
                  "x": -3.0,
                  "y": 300.0
                },
                {
                  "x": -2.556,
                  "y": 297.272
                },
                {
                  "x": -2.148,
                  "y": 294.676
                },
                {
                  "x": -1.811999999999999,
                  "y": 292.344
                },
                {
                  "x": -1.584,
                  "y": 290.408
                },
                {
                  "x": -1.5,
                  "y": 289.0
                }
              ]
            },
            {
              "startLaneIndex": 1,
              "endLaneIndex": 1,
              "points": [
                {
                  "x": -4.5,
                  "y": 311.0
                },
                {
                  "x": -4.5,
                  "y": 309.592
                },
                {
                  "x": -4.5,
                  "y": 307.656
                },
                {
                  "x": -4.5,
                  "y": 305.324
                },
                {
                  "x": -4.5,
                  "y": 302.728
                },
                {
                  "x": -4.5,
                  "y": 300.0
                },
                {
                  "x": -4.5,
                  "y": 297.272
                },
                {
                  "x": -4.5,
                  "y": 294.676
                },
                {
                  "x": -4.499999999999999,
                  "y": 292.344
                },
                {
                  "x": -4.5,
                  "y": 290.408
                },
                {
                  "x": -4.5,
                  "y": 289.0
                }
              ]
            },
            {
              "startLaneIndex": 1,
              "endLaneIndex": 2,
              "points": [
                {
                  "x": -4.5,
                  "y": 311.0
                },
                {
                  "x": -4.584,
                  "y": 309.592
                },
                {
                  "x": -4.812,
                  "y": 307.656
                },
                {
                  "x": -5.148,
                  "y": 305.324
                },
                {
                  "x": -5.556,
                  "y": 302.728
                },
                {
                  "x": -6.0,
                  "y": 300.0
                },
                {
                  "x": -6.444,
                  "y": 297.272
                },
                {
                  "x": -6.852,
                  "y": 294.676
                },
                {
                  "x": -7.187999999999999,
                  "y": 292.344
                },
                {
                  "x": -7.416,
                  "y": 290.408
                },
                {
                  "x": -7.5,
                  "y": 289.0
                }
              ]
            }
          ]
        }
      ],
      "trafficLight": {
        "roadLinkIndices": [
          0,
          1,
          2,
          3,
          4,
          5,
          6,
          7,
          8,
          9,
          10,
          11
        ],
        "lightphases": [
          {
            "time": 5,
            "availableRoadLinks": [
              10,
              2,
              3,
              6
            ]
          },
          {
            "time": 30,
            "availableRoadLinks": [
              0,
              2,
              3,
              6,
              7,
              10
            ]
          },
          {
            "time": 30,
            "availableRoadLinks": [
              2,
              3,
              4,
              6,
              10,
              11
            ]
          },
          {
            "time": 30,
            "availableRoadLinks": [
              1,
              2,
              3,
              6,
              8,
              10
            ]
          },
          {
            "time": 30,
            "availableRoadLinks": [
              2,
              3,
              5,
              6,
              9,
              10
            ]
          },
          {
            "time": 30,
            "availableRoadLinks": [
              0,
              1,
              2,
              3,
              6,
              10
            ]
          },
          {
            "time": 30,
            "availableRoadLinks": [
              2,
              3,
              6,
              7,
              8,
              10
            ]
          },
          {
            "time": 30,
            "availableRoadLinks": [
              2,
              3,
              4,
              5,
              6,
              10
            ]
          },
          {
            "time": 30,
            "availableRoadLinks": [
              2,
              3,
              6,
              9,
              10,
              11
            ]
          }
        ]
      },
      "virtual": false
    },
    {
      "id": "intersection_1_3",
      "point": {
        "x": 0,
        "y": 600
      },
      "width": 11,
      "roads": [
        "road_0_3_0",
        "road_1_2_1",
        "road_2_3_2",
        "road_1_4_3",
        "road_1_3_0",
        "road_1_3_1",
        "road_1_3_2",
        "road_1_3_3"
      ],
      "roadLinks": [
        {
          "type": "go_straight",
          "startRoad": "road_0_3_0",
          "endRoad": "road_1_3_0",
          "direction": 0,
          "laneLinks": [
            {
              "startLaneIndex": 1,
              "endLaneIndex": 0,
              "points": [
                {
                  "x": -11.0,
                  "y": 595.5
                },
                {
                  "x": -9.592,
                  "y": 595.584
                },
                {
                  "x": -7.656,
                  "y": 595.812
                },
                {
                  "x": -5.324,
                  "y": 596.148
                },
                {
                  "x": -2.7279999999999998,
                  "y": 596.556
                },
                {
                  "x": 0.0,
                  "y": 597.0
                },
                {
                  "x": 2.7279999999999998,
                  "y": 597.444
                },
                {
                  "x": 5.323999999999999,
                  "y": 597.852
                },
                {
                  "x": 7.655999999999999,
                  "y": 598.1879999999999
                },
                {
                  "x": 9.592,
                  "y": 598.4159999999999
                },
                {
                  "x": 11.0,
                  "y": 598.5
                }
              ]
            },
            {
              "startLaneIndex": 1,
              "endLaneIndex": 1,
              "points": [
                {
                  "x": -11.0,
                  "y": 595.5
                },
                {
                  "x": -9.592,
                  "y": 595.5
                },
                {
                  "x": -7.656,
                  "y": 595.5
                },
                {
                  "x": -5.324,
                  "y": 595.5
                },
                {
                  "x": -2.7279999999999998,
                  "y": 595.5
                },
                {
                  "x": 0.0,
                  "y": 595.5
                },
                {
                  "x": 2.7279999999999998,
                  "y": 595.5
                },
                {
                  "x": 5.323999999999999,
                  "y": 595.5
                },
                {
                  "x": 7.655999999999999,
                  "y": 595.4999999999999
                },
                {
                  "x": 9.592,
                  "y": 595.5
                },
                {
                  "x": 11.0,
                  "y": 595.5
                }
              ]
            },
            {
              "startLaneIndex": 1,
              "endLaneIndex": 2,
              "points": [
                {
                  "x": -11.0,
                  "y": 595.5
                },
                {
                  "x": -9.592,
                  "y": 595.4159999999999
                },
                {
                  "x": -7.656,
                  "y": 595.188
                },
                {
                  "x": -5.324,
                  "y": 594.852
                },
                {
                  "x": -2.7279999999999998,
                  "y": 594.444
                },
                {
                  "x": 0.0,
                  "y": 594.0
                },
                {
                  "x": 2.7279999999999998,
                  "y": 593.556
                },
                {
                  "x": 5.323999999999999,
                  "y": 593.148
                },
                {
                  "x": 7.655999999999999,
                  "y": 592.8119999999999
                },
                {
                  "x": 9.592,
                  "y": 592.584
                },
                {
                  "x": 11.0,
                  "y": 592.5
                }
              ]
            }
          ]
        },
        {
          "type": "turn_left",
          "startRoad": "road_0_3_0",
          "endRoad": "road_1_3_1",
          "direction": 0,
          "laneLinks": [
            {
              "startLaneIndex": 0,
              "endLaneIndex": 0,
              "points": [
                {
                  "x": -11.0,
                  "y": 598.5
                },
                {
                  "x": -9.759,
                  "y": 598.751
                },
                {
                  "x": -8.292,
                  "y": 599.448
                },
                {
                  "x": -6.683,
                  "y": 600.507
                },
                {
                  "x": -5.016,
                  "y": 601.844
                },
                {
                  "x": -3.375,
                  "y": 603.375
                },
                {
                  "x": -1.844,
                  "y": 605.016
                },
                {
                  "x": -0.507000000000001,
                  "y": 606.683
                },
                {
                  "x": 0.551999999999999,
                  "y": 608.2919999999999
                },
                {
                  "x": 1.249,
                  "y": 609.759
                },
                {
                  "x": 1.5,
                  "y": 611.0
                }
              ]
            },
            {
              "startLaneIndex": 0,
              "endLaneIndex": 1,
              "points": [
                {
                  "x": -11.0,
                  "y": 598.5
                },
                {
                  "x": -9.675,
                  "y": 598.751
                },
                {
                  "x": -7.98,
                  "y": 599.448
                },
                {
                  "x": -6.035,
                  "y": 600.507
                },
                {
                  "x": -3.96,
                  "y": 601.844
                },
                {
                  "x": -1.875,
                  "y": 603.375
                },
                {
                  "x": 0.1,
                  "y": 605.016
                },
                {
                  "x": 1.844999999999999,
                  "y": 606.683
                },
                {
                  "x": 3.239999999999999,
                  "y": 608.2919999999999
                },
                {
                  "x": 4.165,
                  "y": 609.759
                },
                {
                  "x": 4.5,
                  "y": 611.0
                }
              ]
            },
            {
              "startLaneIndex": 0,
              "endLaneIndex": 2,
              "points": [
                {
                  "x": -11.0,
                  "y": 598.5
                },
                {
                  "x": -9.591,
                  "y": 598.751
                },
                {
                  "x": -7.668,
                  "y": 599.448
                },
                {
                  "x": -5.387,
                  "y": 600.507
                },
                {
                  "x": -2.904,
                  "y": 601.844
                },
                {
                  "x": -0.375,
                  "y": 603.375
                },
                {
                  "x": 2.044,
                  "y": 605.016
                },
                {
                  "x": 4.196999999999999,
                  "y": 606.683
                },
                {
                  "x": 5.927999999999999,
                  "y": 608.2919999999999
                },
                {
                  "x": 7.081,
                  "y": 609.759
                },
                {
                  "x": 7.5,
                  "y": 611.0
                }
              ]
            }
          ]
        },
        {
          "type": "turn_right",
          "startRoad": "road_0_3_0",
          "endRoad": "road_1_3_3",
          "direction": 0,
          "laneLinks": [
            {
              "startLaneIndex": 2,
              "endLaneIndex": 0,
              "points": [
                {
                  "x": -11.0,
                  "y": 592.5
                },
                {
                  "x": -9.843,
                  "y": 592.501
                },
                {
                  "x": -8.604,
                  "y": 592.488
                },
                {
                  "x": -7.3309999999999995,
                  "y": 592.437
                },
                {
                  "x": -6.072,
                  "y": 592.324
                },
                {
                  "x": -4.875,
                  "y": 592.125
                },
                {
                  "x": -3.788,
                  "y": 591.816
                },
                {
                  "x": -2.859000000000001,
                  "y": 591.373
                },
                {
                  "x": -2.136000000000001,
                  "y": 590.7719999999999
                },
                {
                  "x": -1.6669999999999998,
                  "y": 589.989
                },
                {
                  "x": -1.5,
                  "y": 589.0
                }
              ]
            },
            {
              "startLaneIndex": 2,
              "endLaneIndex": 1,
              "points": [
                {
                  "x": -11.0,
                  "y": 592.5
                },
                {
                  "x": -9.927,
                  "y": 592.501
                },
                {
                  "x": -8.916,
                  "y": 592.488
                },
                {
                  "x": -7.979,
                  "y": 592.437
                },
                {
                  "x": -7.128,
                  "y": 592.324
                },
                {
                  "x": -6.375,
                  "y": 592.125
                },
                {
                  "x": -5.732,
                  "y": 591.816
                },
                {
                  "x": -5.211000000000001,
                  "y": 591.373
                },
                {
                  "x": -4.824000000000001,
                  "y": 590.7719999999999
                },
                {
                  "x": -4.583,
                  "y": 589.989
                },
                {
                  "x": -4.5,
                  "y": 589.0
                }
              ]
            },
            {
              "startLaneIndex": 2,
              "endLaneIndex": 2,
              "points": [
                {
                  "x": -11.0,
                  "y": 592.5
                },
                {
                  "x": -10.011,
                  "y": 592.501
                },
                {
                  "x": -9.228,
                  "y": 592.488
                },
                {
                  "x": -8.627,
                  "y": 592.437
                },
                {
                  "x": -8.184,
                  "y": 592.324
                },
                {
                  "x": -7.875,
                  "y": 592.125
                },
                {
                  "x": -7.676,
                  "y": 591.816
                },
                {
                  "x": -7.563000000000001,
                  "y": 591.373
                },
                {
                  "x": -7.512000000000001,
                  "y": 590.7719999999999
                },
                {
                  "x": -7.499,
                  "y": 589.989
                },
                {
                  "x": -7.5,
                  "y": 589.0
                }
              ]
            }
          ]
        },
        {
          "type": "turn_right",
          "startRoad": "road_1_2_1",
          "endRoad": "road_1_3_0",
          "direction": 1,
          "laneLinks": [
            {
              "startLaneIndex": 2,
              "endLaneIndex": 0,
              "points": [
                {
                  "x": 7.5,
                  "y": 589.0
                },
                {
                  "x": 7.499,
                  "y": 590.157
                },
                {
                  "x": 7.512,
                  "y": 591.396
                },
                {
                  "x": 7.563,
                  "y": 592.669
                },
                {
                  "x": 7.676,
                  "y": 593.928
                },
                {
                  "x": 7.875,
                  "y": 595.125
                },
                {
                  "x": 8.184,
                  "y": 596.212
                },
                {
                  "x": 8.627,
                  "y": 597.141
                },
                {
                  "x": 9.228,
                  "y": 597.8639999999999
                },
                {
                  "x": 10.011,
                  "y": 598.333
                },
                {
                  "x": 11.0,
                  "y": 598.5
                }
              ]
            },
            {
              "startLaneIndex": 2,
              "endLaneIndex": 1,
              "points": [
                {
                  "x": 7.5,
                  "y": 589.0
                },
                {
                  "x": 7.499,
                  "y": 590.073
                },
                {
                  "x": 7.512,
                  "y": 591.084
                },
                {
                  "x": 7.563,
                  "y": 592.021
                },
                {
                  "x": 7.676,
                  "y": 592.872
                },
                {
                  "x": 7.875,
                  "y": 593.625
                },
                {
                  "x": 8.184,
                  "y": 594.268
                },
                {
                  "x": 8.627,
                  "y": 594.789
                },
                {
                  "x": 9.228,
                  "y": 595.1759999999999
                },
                {
                  "x": 10.011,
                  "y": 595.417
                },
                {
                  "x": 11.0,
                  "y": 595.5
                }
              ]
            },
            {
              "startLaneIndex": 2,
              "endLaneIndex": 2,
              "points": [
                {
                  "x": 7.5,
                  "y": 589.0
                },
                {
                  "x": 7.499,
                  "y": 589.989
                },
                {
                  "x": 7.512,
                  "y": 590.772
                },
                {
                  "x": 7.563,
                  "y": 591.373
                },
                {
                  "x": 7.676,
                  "y": 591.816
                },
                {
                  "x": 7.875,
                  "y": 592.125
                },
                {
                  "x": 8.184,
                  "y": 592.324
                },
                {
                  "x": 8.627,
                  "y": 592.437
                },
                {
                  "x": 9.228,
                  "y": 592.4879999999999
                },
                {
                  "x": 10.011,
                  "y": 592.501
                },
                {
                  "x": 11.0,
                  "y": 592.5
                }
              ]
            }
          ]
        },
        {
          "type": "go_straight",
          "startRoad": "road_1_2_1",
          "endRoad": "road_1_3_1",
          "direction": 1,
          "laneLinks": [
            {
              "startLaneIndex": 1,
              "endLaneIndex": 0,
              "points": [
                {
                  "x": 4.5,
                  "y": 589.0
                },
                {
                  "x": 4.416,
                  "y": 590.408
                },
                {
                  "x": 4.188,
                  "y": 592.344
                },
                {
                  "x": 3.852,
                  "y": 594.676
                },
                {
                  "x": 3.444,
                  "y": 597.272
                },
                {
                  "x": 3.0,
                  "y": 600.0
                },
                {
                  "x": 2.556,
                  "y": 602.728
                },
                {
                  "x": 2.148,
                  "y": 605.324
                },
                {
                  "x": 1.811999999999999,
                  "y": 607.656
                },
                {
                  "x": 1.584,
                  "y": 609.592
                },
                {
                  "x": 1.5,
                  "y": 611.0
                }
              ]
            },
            {
              "startLaneIndex": 1,
              "endLaneIndex": 1,
              "points": [
                {
                  "x": 4.5,
                  "y": 589.0
                },
                {
                  "x": 4.5,
                  "y": 590.408
                },
                {
                  "x": 4.5,
                  "y": 592.344
                },
                {
                  "x": 4.5,
                  "y": 594.676
                },
                {
                  "x": 4.5,
                  "y": 597.272
                },
                {
                  "x": 4.5,
                  "y": 600.0
                },
                {
                  "x": 4.5,
                  "y": 602.728
                },
                {
                  "x": 4.5,
                  "y": 605.324
                },
                {
                  "x": 4.499999999999999,
                  "y": 607.656
                },
                {
                  "x": 4.5,
                  "y": 609.592
                },
                {
                  "x": 4.5,
                  "y": 611.0
                }
              ]
            },
            {
              "startLaneIndex": 1,
              "endLaneIndex": 2,
              "points": [
                {
                  "x": 4.5,
                  "y": 589.0
                },
                {
                  "x": 4.584,
                  "y": 590.408
                },
                {
                  "x": 4.812,
                  "y": 592.344
                },
                {
                  "x": 5.148,
                  "y": 594.676
                },
                {
                  "x": 5.556,
                  "y": 597.272
                },
                {
                  "x": 6.0,
                  "y": 600.0
                },
                {
                  "x": 6.444,
                  "y": 602.728
                },
                {
                  "x": 6.852,
                  "y": 605.324
                },
                {
                  "x": 7.187999999999999,
                  "y": 607.656
                },
                {
                  "x": 7.416,
                  "y": 609.592
                },
                {
                  "x": 7.5,
                  "y": 611.0
                }
              ]
            }
          ]
        },
        {
          "type": "turn_left",
          "startRoad": "road_1_2_1",
          "endRoad": "road_1_3_2",
          "direction": 1,
          "laneLinks": [
            {
              "startLaneIndex": 0,
              "endLaneIndex": 0,
              "points": [
                {
                  "x": 1.5,
                  "y": 589.0
                },
                {
                  "x": 1.249,
                  "y": 590.241
                },
                {
                  "x": 0.552,
                  "y": 591.708
                },
                {
                  "x": -0.507,
                  "y": 593.317
                },
                {
                  "x": -1.844,
                  "y": 594.984
                },
                {
                  "x": -3.375,
                  "y": 596.625
                },
                {
                  "x": -5.016,
                  "y": 598.156
                },
                {
                  "x": -6.683,
                  "y": 599.4929999999999
                },
                {
                  "x": -8.292,
                  "y": 600.5519999999999
                },
                {
                  "x": -9.759,
                  "y": 601.249
                },
                {
                  "x": -11.0,
                  "y": 601.5
                }
              ]
            },
            {
              "startLaneIndex": 0,
              "endLaneIndex": 1,
              "points": [
                {
                  "x": 1.5,
                  "y": 589.0
                },
                {
                  "x": 1.249,
                  "y": 590.325
                },
                {
                  "x": 0.552,
                  "y": 592.02
                },
                {
                  "x": -0.507,
                  "y": 593.965
                },
                {
                  "x": -1.844,
                  "y": 596.04
                },
                {
                  "x": -3.375,
                  "y": 598.125
                },
                {
                  "x": -5.016,
                  "y": 600.1
                },
                {
                  "x": -6.683,
                  "y": 601.845
                },
                {
                  "x": -8.292,
                  "y": 603.2399999999999
                },
                {
                  "x": -9.759,
                  "y": 604.165
                },
                {
                  "x": -11.0,
                  "y": 604.5
                }
              ]
            },
            {
              "startLaneIndex": 0,
              "endLaneIndex": 2,
              "points": [
                {
                  "x": 1.5,
                  "y": 589.0
                },
                {
                  "x": 1.249,
                  "y": 590.409
                },
                {
                  "x": 0.552,
                  "y": 592.332
                },
                {
                  "x": -0.507,
                  "y": 594.613
                },
                {
                  "x": -1.844,
                  "y": 597.096
                },
                {
                  "x": -3.375,
                  "y": 599.625
                },
                {
                  "x": -5.016,
                  "y": 602.044
                },
                {
                  "x": -6.683,
                  "y": 604.197
                },
                {
                  "x": -8.292,
                  "y": 605.9279999999999
                },
                {
                  "x": -9.759,
                  "y": 607.081
                },
                {
                  "x": -11.0,
                  "y": 607.5
                }
              ]
            }
          ]
        },
        {
          "type": "turn_right",
          "startRoad": "road_2_3_2",
          "endRoad": "road_1_3_1",
          "direction": 2,
          "laneLinks": [
            {
              "startLaneIndex": 2,
              "endLaneIndex": 0,
              "points": [
                {
                  "x": 11.0,
                  "y": 607.5
                },
                {
                  "x": 9.843,
                  "y": 607.499
                },
                {
                  "x": 8.604,
                  "y": 607.512
                },
                {
                  "x": 7.3309999999999995,
                  "y": 607.563
                },
                {
                  "x": 6.072,
                  "y": 607.676
                },
                {
                  "x": 4.875,
                  "y": 607.875
                },
                {
                  "x": 3.788,
                  "y": 608.184
                },
                {
                  "x": 2.859000000000001,
                  "y": 608.627
                },
                {
                  "x": 2.136000000000001,
                  "y": 609.2279999999998
                },
                {
                  "x": 1.6669999999999998,
                  "y": 610.011
                },
                {
                  "x": 1.5,
                  "y": 611.0
                }
              ]
            },
            {
              "startLaneIndex": 2,
              "endLaneIndex": 1,
              "points": [
                {
                  "x": 11.0,
                  "y": 607.5
                },
                {
                  "x": 9.927,
                  "y": 607.499
                },
                {
                  "x": 8.916,
                  "y": 607.512
                },
                {
                  "x": 7.979,
                  "y": 607.563
                },
                {
                  "x": 7.128,
                  "y": 607.676
                },
                {
                  "x": 6.375,
                  "y": 607.875
                },
                {
                  "x": 5.732,
                  "y": 608.184
                },
                {
                  "x": 5.211000000000001,
                  "y": 608.627
                },
                {
                  "x": 4.824000000000001,
                  "y": 609.2279999999998
                },
                {
                  "x": 4.583,
                  "y": 610.011
                },
                {
                  "x": 4.5,
                  "y": 611.0
                }
              ]
            },
            {
              "startLaneIndex": 2,
              "endLaneIndex": 2,
              "points": [
                {
                  "x": 11.0,
                  "y": 607.5
                },
                {
                  "x": 10.011,
                  "y": 607.499
                },
                {
                  "x": 9.228,
                  "y": 607.512
                },
                {
                  "x": 8.627,
                  "y": 607.563
                },
                {
                  "x": 8.184,
                  "y": 607.676
                },
                {
                  "x": 7.875,
                  "y": 607.875
                },
                {
                  "x": 7.676,
                  "y": 608.184
                },
                {
                  "x": 7.563000000000001,
                  "y": 608.627
                },
                {
                  "x": 7.512000000000001,
                  "y": 609.2279999999998
                },
                {
                  "x": 7.499,
                  "y": 610.011
                },
                {
                  "x": 7.5,
                  "y": 611.0
                }
              ]
            }
          ]
        },
        {
          "type": "go_straight",
          "startRoad": "road_2_3_2",
          "endRoad": "road_1_3_2",
          "direction": 2,
          "laneLinks": [
            {
              "startLaneIndex": 1,
              "endLaneIndex": 0,
              "points": [
                {
                  "x": 11.0,
                  "y": 604.5
                },
                {
                  "x": 9.592,
                  "y": 604.4159999999999
                },
                {
                  "x": 7.656,
                  "y": 604.188
                },
                {
                  "x": 5.324,
                  "y": 603.852
                },
                {
                  "x": 2.7279999999999998,
                  "y": 603.444
                },
                {
                  "x": 0.0,
                  "y": 603.0
                },
                {
                  "x": -2.7279999999999998,
                  "y": 602.556
                },
                {
                  "x": -5.323999999999999,
                  "y": 602.148
                },
                {
                  "x": -7.655999999999999,
                  "y": 601.8119999999999
                },
                {
                  "x": -9.592,
                  "y": 601.584
                },
                {
                  "x": -11.0,
                  "y": 601.5
                }
              ]
            },
            {
              "startLaneIndex": 1,
              "endLaneIndex": 1,
              "points": [
                {
                  "x": 11.0,
                  "y": 604.5
                },
                {
                  "x": 9.592,
                  "y": 604.5
                },
                {
                  "x": 7.656,
                  "y": 604.5
                },
                {
                  "x": 5.324,
                  "y": 604.5
                },
                {
                  "x": 2.7279999999999998,
                  "y": 604.5
                },
                {
                  "x": 0.0,
                  "y": 604.5
                },
                {
                  "x": -2.7279999999999998,
                  "y": 604.5
                },
                {
                  "x": -5.323999999999999,
                  "y": 604.5
                },
                {
                  "x": -7.655999999999999,
                  "y": 604.4999999999999
                },
                {
                  "x": -9.592,
                  "y": 604.5
                },
                {
                  "x": -11.0,
                  "y": 604.5
                }
              ]
            },
            {
              "startLaneIndex": 1,
              "endLaneIndex": 2,
              "points": [
                {
                  "x": 11.0,
                  "y": 604.5
                },
                {
                  "x": 9.592,
                  "y": 604.584
                },
                {
                  "x": 7.656,
                  "y": 604.812
                },
                {
                  "x": 5.324,
                  "y": 605.148
                },
                {
                  "x": 2.7279999999999998,
                  "y": 605.556
                },
                {
                  "x": 0.0,
                  "y": 606.0
                },
                {
                  "x": -2.7279999999999998,
                  "y": 606.444
                },
                {
                  "x": -5.323999999999999,
                  "y": 606.852
                },
                {
                  "x": -7.655999999999999,
                  "y": 607.1879999999999
                },
                {
                  "x": -9.592,
                  "y": 607.4159999999999
                },
                {
                  "x": -11.0,
                  "y": 607.5
                }
              ]
            }
          ]
        },
        {
          "type": "turn_left",
          "startRoad": "road_2_3_2",
          "endRoad": "road_1_3_3",
          "direction": 2,
          "laneLinks": [
            {
              "startLaneIndex": 0,
              "endLaneIndex": 0,
              "points": [
                {
                  "x": 11.0,
                  "y": 601.5
                },
                {
                  "x": 9.759,
                  "y": 601.249
                },
                {
                  "x": 8.292,
                  "y": 600.552
                },
                {
                  "x": 6.683,
                  "y": 599.4929999999999
                },
                {
                  "x": 5.016,
                  "y": 598.156
                },
                {
                  "x": 3.375,
                  "y": 596.625
                },
                {
                  "x": 1.844,
                  "y": 594.984
                },
                {
                  "x": 0.507000000000001,
                  "y": 593.317
                },
                {
                  "x": -0.551999999999999,
                  "y": 591.7079999999999
                },
                {
                  "x": -1.249,
                  "y": 590.241
                },
                {
                  "x": -1.5,
                  "y": 589.0
                }
              ]
            },
            {
              "startLaneIndex": 0,
              "endLaneIndex": 1,
              "points": [
                {
                  "x": 11.0,
                  "y": 601.5
                },
                {
                  "x": 9.675,
                  "y": 601.249
                },
                {
                  "x": 7.98,
                  "y": 600.552
                },
                {
                  "x": 6.035,
                  "y": 599.4929999999999
                },
                {
                  "x": 3.96,
                  "y": 598.156
                },
                {
                  "x": 1.875,
                  "y": 596.625
                },
                {
                  "x": -0.1,
                  "y": 594.984
                },
                {
                  "x": -1.844999999999999,
                  "y": 593.317
                },
                {
                  "x": -3.239999999999999,
                  "y": 591.7079999999999
                },
                {
                  "x": -4.165,
                  "y": 590.241
                },
                {
                  "x": -4.5,
                  "y": 589.0
                }
              ]
            },
            {
              "startLaneIndex": 0,
              "endLaneIndex": 2,
              "points": [
                {
                  "x": 11.0,
                  "y": 601.5
                },
                {
                  "x": 9.591,
                  "y": 601.249
                },
                {
                  "x": 7.668,
                  "y": 600.552
                },
                {
                  "x": 5.387,
                  "y": 599.4929999999999
                },
                {
                  "x": 2.904,
                  "y": 598.156
                },
                {
                  "x": 0.375,
                  "y": 596.625
                },
                {
                  "x": -2.044,
                  "y": 594.984
                },
                {
                  "x": -4.196999999999999,
                  "y": 593.317
                },
                {
                  "x": -5.927999999999999,
                  "y": 591.7079999999999
                },
                {
                  "x": -7.081,
                  "y": 590.241
                },
                {
                  "x": -7.5,
                  "y": 589.0
                }
              ]
            }
          ]
        },
        {
          "type": "turn_left",
          "startRoad": "road_1_4_3",
          "endRoad": "road_1_3_0",
          "direction": 3,
          "laneLinks": [
            {
              "startLaneIndex": 0,
              "endLaneIndex": 0,
              "points": [
                {
                  "x": -1.5,
                  "y": 611.0
                },
                {
                  "x": -1.249,
                  "y": 609.759
                },
                {
                  "x": -0.552,
                  "y": 608.292
                },
                {
                  "x": 0.507,
                  "y": 606.683
                },
                {
                  "x": 1.844,
                  "y": 605.016
                },
                {
                  "x": 3.375,
                  "y": 603.375
                },
                {
                  "x": 5.016,
                  "y": 601.844
                },
                {
                  "x": 6.683,
                  "y": 600.507
                },
                {
                  "x": 8.292,
                  "y": 599.4479999999999
                },
                {
                  "x": 9.759,
                  "y": 598.751
                },
                {
                  "x": 11.0,
                  "y": 598.5
                }
              ]
            },
            {
              "startLaneIndex": 0,
              "endLaneIndex": 1,
              "points": [
                {
                  "x": -1.5,
                  "y": 611.0
                },
                {
                  "x": -1.249,
                  "y": 609.675
                },
                {
                  "x": -0.552,
                  "y": 607.98
                },
                {
                  "x": 0.507,
                  "y": 606.035
                },
                {
                  "x": 1.844,
                  "y": 603.96
                },
                {
                  "x": 3.375,
                  "y": 601.875
                },
                {
                  "x": 5.016,
                  "y": 599.9
                },
                {
                  "x": 6.683,
                  "y": 598.155
                },
                {
                  "x": 8.292,
                  "y": 596.7599999999999
                },
                {
                  "x": 9.759,
                  "y": 595.835
                },
                {
                  "x": 11.0,
                  "y": 595.5
                }
              ]
            },
            {
              "startLaneIndex": 0,
              "endLaneIndex": 2,
              "points": [
                {
                  "x": -1.5,
                  "y": 611.0
                },
                {
                  "x": -1.249,
                  "y": 609.591
                },
                {
                  "x": -0.552,
                  "y": 607.668
                },
                {
                  "x": 0.507,
                  "y": 605.387
                },
                {
                  "x": 1.844,
                  "y": 602.904
                },
                {
                  "x": 3.375,
                  "y": 600.375
                },
                {
                  "x": 5.016,
                  "y": 597.956
                },
                {
                  "x": 6.683,
                  "y": 595.803
                },
                {
                  "x": 8.292,
                  "y": 594.0719999999999
                },
                {
                  "x": 9.759,
                  "y": 592.919
                },
                {
                  "x": 11.0,
                  "y": 592.5
                }
              ]
            }
          ]
        },
        {
          "type": "turn_right",
          "startRoad": "road_1_4_3",
          "endRoad": "road_1_3_2",
          "direction": 3,
          "laneLinks": [
            {
              "startLaneIndex": 2,
              "endLaneIndex": 0,
              "points": [
                {
                  "x": -7.5,
                  "y": 611.0
                },
                {
                  "x": -7.499,
                  "y": 609.843
                },
                {
                  "x": -7.512,
                  "y": 608.604
                },
                {
                  "x": -7.563,
                  "y": 607.331
                },
                {
                  "x": -7.676,
                  "y": 606.072
                },
                {
                  "x": -7.875,
                  "y": 604.875
                },
                {
                  "x": -8.184,
                  "y": 603.788
                },
                {
                  "x": -8.627,
                  "y": 602.859
                },
                {
                  "x": -9.228,
                  "y": 602.1359999999999
                },
                {
                  "x": -10.011,
                  "y": 601.667
                },
                {
                  "x": -11.0,
                  "y": 601.5
                }
              ]
            },
            {
              "startLaneIndex": 2,
              "endLaneIndex": 1,
              "points": [
                {
                  "x": -7.5,
                  "y": 611.0
                },
                {
                  "x": -7.499,
                  "y": 609.927
                },
                {
                  "x": -7.512,
                  "y": 608.9159999999999
                },
                {
                  "x": -7.563,
                  "y": 607.979
                },
                {
                  "x": -7.676,
                  "y": 607.128
                },
                {
                  "x": -7.875,
                  "y": 606.375
                },
                {
                  "x": -8.184,
                  "y": 605.732
                },
                {
                  "x": -8.627,
                  "y": 605.211
                },
                {
                  "x": -9.228,
                  "y": 604.8239999999998
                },
                {
                  "x": -10.011,
                  "y": 604.583
                },
                {
                  "x": -11.0,
                  "y": 604.5
                }
              ]
            },
            {
              "startLaneIndex": 2,
              "endLaneIndex": 2,
              "points": [
                {
                  "x": -7.5,
                  "y": 611.0
                },
                {
                  "x": -7.499,
                  "y": 610.011
                },
                {
                  "x": -7.512,
                  "y": 609.228
                },
                {
                  "x": -7.563,
                  "y": 608.627
                },
                {
                  "x": -7.676,
                  "y": 608.184
                },
                {
                  "x": -7.875,
                  "y": 607.875
                },
                {
                  "x": -8.184,
                  "y": 607.676
                },
                {
                  "x": -8.627,
                  "y": 607.563
                },
                {
                  "x": -9.228,
                  "y": 607.512
                },
                {
                  "x": -10.011,
                  "y": 607.499
                },
                {
                  "x": -11.0,
                  "y": 607.5
                }
              ]
            }
          ]
        },
        {
          "type": "go_straight",
          "startRoad": "road_1_4_3",
          "endRoad": "road_1_3_3",
          "direction": 3,
          "laneLinks": [
            {
              "startLaneIndex": 1,
              "endLaneIndex": 0,
              "points": [
                {
                  "x": -4.5,
                  "y": 611.0
                },
                {
                  "x": -4.416,
                  "y": 609.592
                },
                {
                  "x": -4.188,
                  "y": 607.656
                },
                {
                  "x": -3.852,
                  "y": 605.324
                },
                {
                  "x": -3.444,
                  "y": 602.728
                },
                {
                  "x": -3.0,
                  "y": 600.0
                },
                {
                  "x": -2.556,
                  "y": 597.272
                },
                {
                  "x": -2.148,
                  "y": 594.676
                },
                {
                  "x": -1.811999999999999,
                  "y": 592.3439999999999
                },
                {
                  "x": -1.584,
                  "y": 590.408
                },
                {
                  "x": -1.5,
                  "y": 589.0
                }
              ]
            },
            {
              "startLaneIndex": 1,
              "endLaneIndex": 1,
              "points": [
                {
                  "x": -4.5,
                  "y": 611.0
                },
                {
                  "x": -4.5,
                  "y": 609.592
                },
                {
                  "x": -4.5,
                  "y": 607.656
                },
                {
                  "x": -4.5,
                  "y": 605.324
                },
                {
                  "x": -4.5,
                  "y": 602.728
                },
                {
                  "x": -4.5,
                  "y": 600.0
                },
                {
                  "x": -4.5,
                  "y": 597.272
                },
                {
                  "x": -4.5,
                  "y": 594.676
                },
                {
                  "x": -4.499999999999999,
                  "y": 592.3439999999999
                },
                {
                  "x": -4.5,
                  "y": 590.408
                },
                {
                  "x": -4.5,
                  "y": 589.0
                }
              ]
            },
            {
              "startLaneIndex": 1,
              "endLaneIndex": 2,
              "points": [
                {
                  "x": -4.5,
                  "y": 611.0
                },
                {
                  "x": -4.584,
                  "y": 609.592
                },
                {
                  "x": -4.812,
                  "y": 607.656
                },
                {
                  "x": -5.148,
                  "y": 605.324
                },
                {
                  "x": -5.556,
                  "y": 602.728
                },
                {
                  "x": -6.0,
                  "y": 600.0
                },
                {
                  "x": -6.444,
                  "y": 597.272
                },
                {
                  "x": -6.852,
                  "y": 594.676
                },
                {
                  "x": -7.187999999999999,
                  "y": 592.3439999999999
                },
                {
                  "x": -7.416,
                  "y": 590.408
                },
                {
                  "x": -7.5,
                  "y": 589.0
                }
              ]
            }
          ]
        }
      ],
      "trafficLight": {
        "roadLinkIndices": [
          0,
          1,
          2,
          3,
          4,
          5,
          6,
          7,
          8,
          9,
          10,
          11
        ],
        "lightphases": [
          {
            "time": 5,
            "availableRoadLinks": [
              10,
              2,
              3,
              6
            ]
          },
          {
            "time": 30,
            "availableRoadLinks": [
              0,
              2,
              3,
              6,
              7,
              10
            ]
          },
          {
            "time": 30,
            "availableRoadLinks": [
              2,
              3,
              4,
              6,
              10,
              11
            ]
          },
          {
            "time": 30,
            "availableRoadLinks": [
              1,
              2,
              3,
              6,
              8,
              10
            ]
          },
          {
            "time": 30,
            "availableRoadLinks": [
              2,
              3,
              5,
              6,
              9,
              10
            ]
          },
          {
            "time": 30,
            "availableRoadLinks": [
              0,
              1,
              2,
              3,
              6,
              10
            ]
          },
          {
            "time": 30,
            "availableRoadLinks": [
              2,
              3,
              6,
              7,
              8,
              10
            ]
          },
          {
            "time": 30,
            "availableRoadLinks": [
              2,
              3,
              4,
              5,
              6,
              10
            ]
          },
          {
            "time": 30,
            "availableRoadLinks": [
              2,
              3,
              6,
              9,
              10,
              11
            ]
          }
        ]
      },
      "virtual": false
    },
    {
      "id": "intersection_1_4",
      "point": {
        "x": 0,
        "y": 900
      },
      "width": 11,
      "roads": [
        "road_0_4_0",
        "road_1_3_1",
        "road_2_4_2",
        "road_1_5_3",
        "road_1_4_0",
        "road_1_4_1",
        "road_1_4_2",
        "road_1_4_3"
      ],
      "roadLinks": [
        {
          "type": "go_straight",
          "startRoad": "road_0_4_0",
          "endRoad": "road_1_4_0",
          "direction": 0,
          "laneLinks": [
            {
              "startLaneIndex": 1,
              "endLaneIndex": 0,
              "points": [
                {
                  "x": -11.0,
                  "y": 895.5
                },
                {
                  "x": -9.592,
                  "y": 895.584
                },
                {
                  "x": -7.656,
                  "y": 895.812
                },
                {
                  "x": -5.324,
                  "y": 896.148
                },
                {
                  "x": -2.7279999999999998,
                  "y": 896.556
                },
                {
                  "x": 0.0,
                  "y": 897.0
                },
                {
                  "x": 2.7279999999999998,
                  "y": 897.444
                },
                {
                  "x": 5.323999999999999,
                  "y": 897.852
                },
                {
                  "x": 7.655999999999999,
                  "y": 898.1879999999999
                },
                {
                  "x": 9.592,
                  "y": 898.4159999999999
                },
                {
                  "x": 11.0,
                  "y": 898.5
                }
              ]
            },
            {
              "startLaneIndex": 1,
              "endLaneIndex": 1,
              "points": [
                {
                  "x": -11.0,
                  "y": 895.5
                },
                {
                  "x": -9.592,
                  "y": 895.5
                },
                {
                  "x": -7.656,
                  "y": 895.5
                },
                {
                  "x": -5.324,
                  "y": 895.5
                },
                {
                  "x": -2.7279999999999998,
                  "y": 895.5
                },
                {
                  "x": 0.0,
                  "y": 895.5
                },
                {
                  "x": 2.7279999999999998,
                  "y": 895.5
                },
                {
                  "x": 5.323999999999999,
                  "y": 895.5
                },
                {
                  "x": 7.655999999999999,
                  "y": 895.4999999999999
                },
                {
                  "x": 9.592,
                  "y": 895.5
                },
                {
                  "x": 11.0,
                  "y": 895.5
                }
              ]
            },
            {
              "startLaneIndex": 1,
              "endLaneIndex": 2,
              "points": [
                {
                  "x": -11.0,
                  "y": 895.5
                },
                {
                  "x": -9.592,
                  "y": 895.4159999999999
                },
                {
                  "x": -7.656,
                  "y": 895.188
                },
                {
                  "x": -5.324,
                  "y": 894.852
                },
                {
                  "x": -2.7279999999999998,
                  "y": 894.444
                },
                {
                  "x": 0.0,
                  "y": 894.0
                },
                {
                  "x": 2.7279999999999998,
                  "y": 893.556
                },
                {
                  "x": 5.323999999999999,
                  "y": 893.148
                },
                {
                  "x": 7.655999999999999,
                  "y": 892.8119999999999
                },
                {
                  "x": 9.592,
                  "y": 892.584
                },
                {
                  "x": 11.0,
                  "y": 892.5
                }
              ]
            }
          ]
        },
        {
          "type": "turn_left",
          "startRoad": "road_0_4_0",
          "endRoad": "road_1_4_1",
          "direction": 0,
          "laneLinks": [
            {
              "startLaneIndex": 0,
              "endLaneIndex": 0,
              "points": [
                {
                  "x": -11.0,
                  "y": 898.5
                },
                {
                  "x": -9.759,
                  "y": 898.751
                },
                {
                  "x": -8.292,
                  "y": 899.448
                },
                {
                  "x": -6.683,
                  "y": 900.507
                },
                {
                  "x": -5.016,
                  "y": 901.844
                },
                {
                  "x": -3.375,
                  "y": 903.375
                },
                {
                  "x": -1.844,
                  "y": 905.016
                },
                {
                  "x": -0.507000000000001,
                  "y": 906.683
                },
                {
                  "x": 0.551999999999999,
                  "y": 908.2919999999999
                },
                {
                  "x": 1.249,
                  "y": 909.759
                },
                {
                  "x": 1.5,
                  "y": 911.0
                }
              ]
            },
            {
              "startLaneIndex": 0,
              "endLaneIndex": 1,
              "points": [
                {
                  "x": -11.0,
                  "y": 898.5
                },
                {
                  "x": -9.675,
                  "y": 898.751
                },
                {
                  "x": -7.98,
                  "y": 899.448
                },
                {
                  "x": -6.035,
                  "y": 900.507
                },
                {
                  "x": -3.96,
                  "y": 901.844
                },
                {
                  "x": -1.875,
                  "y": 903.375
                },
                {
                  "x": 0.1,
                  "y": 905.016
                },
                {
                  "x": 1.844999999999999,
                  "y": 906.683
                },
                {
                  "x": 3.239999999999999,
                  "y": 908.2919999999999
                },
                {
                  "x": 4.165,
                  "y": 909.759
                },
                {
                  "x": 4.5,
                  "y": 911.0
                }
              ]
            },
            {
              "startLaneIndex": 0,
              "endLaneIndex": 2,
              "points": [
                {
                  "x": -11.0,
                  "y": 898.5
                },
                {
                  "x": -9.591,
                  "y": 898.751
                },
                {
                  "x": -7.668,
                  "y": 899.448
                },
                {
                  "x": -5.387,
                  "y": 900.507
                },
                {
                  "x": -2.904,
                  "y": 901.844
                },
                {
                  "x": -0.375,
                  "y": 903.375
                },
                {
                  "x": 2.044,
                  "y": 905.016
                },
                {
                  "x": 4.196999999999999,
                  "y": 906.683
                },
                {
                  "x": 5.927999999999999,
                  "y": 908.2919999999999
                },
                {
                  "x": 7.081,
                  "y": 909.759
                },
                {
                  "x": 7.5,
                  "y": 911.0
                }
              ]
            }
          ]
        },
        {
          "type": "turn_right",
          "startRoad": "road_0_4_0",
          "endRoad": "road_1_4_3",
          "direction": 0,
          "laneLinks": [
            {
              "startLaneIndex": 2,
              "endLaneIndex": 0,
              "points": [
                {
                  "x": -11.0,
                  "y": 892.5
                },
                {
                  "x": -9.843,
                  "y": 892.501
                },
                {
                  "x": -8.604,
                  "y": 892.488
                },
                {
                  "x": -7.3309999999999995,
                  "y": 892.437
                },
                {
                  "x": -6.072,
                  "y": 892.324
                },
                {
                  "x": -4.875,
                  "y": 892.125
                },
                {
                  "x": -3.788,
                  "y": 891.816
                },
                {
                  "x": -2.859000000000001,
                  "y": 891.373
                },
                {
                  "x": -2.136000000000001,
                  "y": 890.7719999999999
                },
                {
                  "x": -1.6669999999999998,
                  "y": 889.989
                },
                {
                  "x": -1.5,
                  "y": 889.0
                }
              ]
            },
            {
              "startLaneIndex": 2,
              "endLaneIndex": 1,
              "points": [
                {
                  "x": -11.0,
                  "y": 892.5
                },
                {
                  "x": -9.927,
                  "y": 892.501
                },
                {
                  "x": -8.916,
                  "y": 892.488
                },
                {
                  "x": -7.979,
                  "y": 892.437
                },
                {
                  "x": -7.128,
                  "y": 892.324
                },
                {
                  "x": -6.375,
                  "y": 892.125
                },
                {
                  "x": -5.732,
                  "y": 891.816
                },
                {
                  "x": -5.211000000000001,
                  "y": 891.373
                },
                {
                  "x": -4.824000000000001,
                  "y": 890.7719999999999
                },
                {
                  "x": -4.583,
                  "y": 889.989
                },
                {
                  "x": -4.5,
                  "y": 889.0
                }
              ]
            },
            {
              "startLaneIndex": 2,
              "endLaneIndex": 2,
              "points": [
                {
                  "x": -11.0,
                  "y": 892.5
                },
                {
                  "x": -10.011,
                  "y": 892.501
                },
                {
                  "x": -9.228,
                  "y": 892.488
                },
                {
                  "x": -8.627,
                  "y": 892.437
                },
                {
                  "x": -8.184,
                  "y": 892.324
                },
                {
                  "x": -7.875,
                  "y": 892.125
                },
                {
                  "x": -7.676,
                  "y": 891.816
                },
                {
                  "x": -7.563000000000001,
                  "y": 891.373
                },
                {
                  "x": -7.512000000000001,
                  "y": 890.7719999999999
                },
                {
                  "x": -7.499,
                  "y": 889.989
                },
                {
                  "x": -7.5,
                  "y": 889.0
                }
              ]
            }
          ]
        },
        {
          "type": "turn_right",
          "startRoad": "road_1_3_1",
          "endRoad": "road_1_4_0",
          "direction": 1,
          "laneLinks": [
            {
              "startLaneIndex": 2,
              "endLaneIndex": 0,
              "points": [
                {
                  "x": 7.5,
                  "y": 889.0
                },
                {
                  "x": 7.499,
                  "y": 890.157
                },
                {
                  "x": 7.512,
                  "y": 891.396
                },
                {
                  "x": 7.563,
                  "y": 892.669
                },
                {
                  "x": 7.676,
                  "y": 893.928
                },
                {
                  "x": 7.875,
                  "y": 895.125
                },
                {
                  "x": 8.184,
                  "y": 896.212
                },
                {
                  "x": 8.627,
                  "y": 897.141
                },
                {
                  "x": 9.228,
                  "y": 897.8639999999999
                },
                {
                  "x": 10.011,
                  "y": 898.333
                },
                {
                  "x": 11.0,
                  "y": 898.5
                }
              ]
            },
            {
              "startLaneIndex": 2,
              "endLaneIndex": 1,
              "points": [
                {
                  "x": 7.5,
                  "y": 889.0
                },
                {
                  "x": 7.499,
                  "y": 890.073
                },
                {
                  "x": 7.512,
                  "y": 891.084
                },
                {
                  "x": 7.563,
                  "y": 892.021
                },
                {
                  "x": 7.676,
                  "y": 892.872
                },
                {
                  "x": 7.875,
                  "y": 893.625
                },
                {
                  "x": 8.184,
                  "y": 894.268
                },
                {
                  "x": 8.627,
                  "y": 894.789
                },
                {
                  "x": 9.228,
                  "y": 895.1759999999999
                },
                {
                  "x": 10.011,
                  "y": 895.417
                },
                {
                  "x": 11.0,
                  "y": 895.5
                }
              ]
            },
            {
              "startLaneIndex": 2,
              "endLaneIndex": 2,
              "points": [
                {
                  "x": 7.5,
                  "y": 889.0
                },
                {
                  "x": 7.499,
                  "y": 889.989
                },
                {
                  "x": 7.512,
                  "y": 890.772
                },
                {
                  "x": 7.563,
                  "y": 891.373
                },
                {
                  "x": 7.676,
                  "y": 891.816
                },
                {
                  "x": 7.875,
                  "y": 892.125
                },
                {
                  "x": 8.184,
                  "y": 892.324
                },
                {
                  "x": 8.627,
                  "y": 892.437
                },
                {
                  "x": 9.228,
                  "y": 892.4879999999999
                },
                {
                  "x": 10.011,
                  "y": 892.501
                },
                {
                  "x": 11.0,
                  "y": 892.5
                }
              ]
            }
          ]
        },
        {
          "type": "go_straight",
          "startRoad": "road_1_3_1",
          "endRoad": "road_1_4_1",
          "direction": 1,
          "laneLinks": [
            {
              "startLaneIndex": 1,
              "endLaneIndex": 0,
              "points": [
                {
                  "x": 4.5,
                  "y": 889.0
                },
                {
                  "x": 4.416,
                  "y": 890.408
                },
                {
                  "x": 4.188,
                  "y": 892.344
                },
                {
                  "x": 3.852,
                  "y": 894.676
                },
                {
                  "x": 3.444,
                  "y": 897.272
                },
                {
                  "x": 3.0,
                  "y": 900.0
                },
                {
                  "x": 2.556,
                  "y": 902.728
                },
                {
                  "x": 2.148,
                  "y": 905.324
                },
                {
                  "x": 1.811999999999999,
                  "y": 907.656
                },
                {
                  "x": 1.584,
                  "y": 909.592
                },
                {
                  "x": 1.5,
                  "y": 911.0
                }
              ]
            },
            {
              "startLaneIndex": 1,
              "endLaneIndex": 1,
              "points": [
                {
                  "x": 4.5,
                  "y": 889.0
                },
                {
                  "x": 4.5,
                  "y": 890.408
                },
                {
                  "x": 4.5,
                  "y": 892.344
                },
                {
                  "x": 4.5,
                  "y": 894.676
                },
                {
                  "x": 4.5,
                  "y": 897.272
                },
                {
                  "x": 4.5,
                  "y": 900.0
                },
                {
                  "x": 4.5,
                  "y": 902.728
                },
                {
                  "x": 4.5,
                  "y": 905.324
                },
                {
                  "x": 4.499999999999999,
                  "y": 907.656
                },
                {
                  "x": 4.5,
                  "y": 909.592
                },
                {
                  "x": 4.5,
                  "y": 911.0
                }
              ]
            },
            {
              "startLaneIndex": 1,
              "endLaneIndex": 2,
              "points": [
                {
                  "x": 4.5,
                  "y": 889.0
                },
                {
                  "x": 4.584,
                  "y": 890.408
                },
                {
                  "x": 4.812,
                  "y": 892.344
                },
                {
                  "x": 5.148,
                  "y": 894.676
                },
                {
                  "x": 5.556,
                  "y": 897.272
                },
                {
                  "x": 6.0,
                  "y": 900.0
                },
                {
                  "x": 6.444,
                  "y": 902.728
                },
                {
                  "x": 6.852,
                  "y": 905.324
                },
                {
                  "x": 7.187999999999999,
                  "y": 907.656
                },
                {
                  "x": 7.416,
                  "y": 909.592
                },
                {
                  "x": 7.5,
                  "y": 911.0
                }
              ]
            }
          ]
        },
        {
          "type": "turn_left",
          "startRoad": "road_1_3_1",
          "endRoad": "road_1_4_2",
          "direction": 1,
          "laneLinks": [
            {
              "startLaneIndex": 0,
              "endLaneIndex": 0,
              "points": [
                {
                  "x": 1.5,
                  "y": 889.0
                },
                {
                  "x": 1.249,
                  "y": 890.241
                },
                {
                  "x": 0.552,
                  "y": 891.708
                },
                {
                  "x": -0.507,
                  "y": 893.317
                },
                {
                  "x": -1.844,
                  "y": 894.984
                },
                {
                  "x": -3.375,
                  "y": 896.625
                },
                {
                  "x": -5.016,
                  "y": 898.156
                },
                {
                  "x": -6.683,
                  "y": 899.4929999999999
                },
                {
                  "x": -8.292,
                  "y": 900.5519999999999
                },
                {
                  "x": -9.759,
                  "y": 901.249
                },
                {
                  "x": -11.0,
                  "y": 901.5
                }
              ]
            },
            {
              "startLaneIndex": 0,
              "endLaneIndex": 1,
              "points": [
                {
                  "x": 1.5,
                  "y": 889.0
                },
                {
                  "x": 1.249,
                  "y": 890.325
                },
                {
                  "x": 0.552,
                  "y": 892.02
                },
                {
                  "x": -0.507,
                  "y": 893.965
                },
                {
                  "x": -1.844,
                  "y": 896.04
                },
                {
                  "x": -3.375,
                  "y": 898.125
                },
                {
                  "x": -5.016,
                  "y": 900.1
                },
                {
                  "x": -6.683,
                  "y": 901.845
                },
                {
                  "x": -8.292,
                  "y": 903.2399999999999
                },
                {
                  "x": -9.759,
                  "y": 904.165
                },
                {
                  "x": -11.0,
                  "y": 904.5
                }
              ]
            },
            {
              "startLaneIndex": 0,
              "endLaneIndex": 2,
              "points": [
                {
                  "x": 1.5,
                  "y": 889.0
                },
                {
                  "x": 1.249,
                  "y": 890.409
                },
                {
                  "x": 0.552,
                  "y": 892.332
                },
                {
                  "x": -0.507,
                  "y": 894.613
                },
                {
                  "x": -1.844,
                  "y": 897.096
                },
                {
                  "x": -3.375,
                  "y": 899.625
                },
                {
                  "x": -5.016,
                  "y": 902.044
                },
                {
                  "x": -6.683,
                  "y": 904.197
                },
                {
                  "x": -8.292,
                  "y": 905.9279999999999
                },
                {
                  "x": -9.759,
                  "y": 907.081
                },
                {
                  "x": -11.0,
                  "y": 907.5
                }
              ]
            }
          ]
        },
        {
          "type": "turn_right",
          "startRoad": "road_2_4_2",
          "endRoad": "road_1_4_1",
          "direction": 2,
          "laneLinks": [
            {
              "startLaneIndex": 2,
              "endLaneIndex": 0,
              "points": [
                {
                  "x": 11.0,
                  "y": 907.5
                },
                {
                  "x": 9.843,
                  "y": 907.499
                },
                {
                  "x": 8.604,
                  "y": 907.512
                },
                {
                  "x": 7.3309999999999995,
                  "y": 907.563
                },
                {
                  "x": 6.072,
                  "y": 907.676
                },
                {
                  "x": 4.875,
                  "y": 907.875
                },
                {
                  "x": 3.788,
                  "y": 908.184
                },
                {
                  "x": 2.859000000000001,
                  "y": 908.627
                },
                {
                  "x": 2.136000000000001,
                  "y": 909.2279999999998
                },
                {
                  "x": 1.6669999999999998,
                  "y": 910.011
                },
                {
                  "x": 1.5,
                  "y": 911.0
                }
              ]
            },
            {
              "startLaneIndex": 2,
              "endLaneIndex": 1,
              "points": [
                {
                  "x": 11.0,
                  "y": 907.5
                },
                {
                  "x": 9.927,
                  "y": 907.499
                },
                {
                  "x": 8.916,
                  "y": 907.512
                },
                {
                  "x": 7.979,
                  "y": 907.563
                },
                {
                  "x": 7.128,
                  "y": 907.676
                },
                {
                  "x": 6.375,
                  "y": 907.875
                },
                {
                  "x": 5.732,
                  "y": 908.184
                },
                {
                  "x": 5.211000000000001,
                  "y": 908.627
                },
                {
                  "x": 4.824000000000001,
                  "y": 909.2279999999998
                },
                {
                  "x": 4.583,
                  "y": 910.011
                },
                {
                  "x": 4.5,
                  "y": 911.0
                }
              ]
            },
            {
              "startLaneIndex": 2,
              "endLaneIndex": 2,
              "points": [
                {
                  "x": 11.0,
                  "y": 907.5
                },
                {
                  "x": 10.011,
                  "y": 907.499
                },
                {
                  "x": 9.228,
                  "y": 907.512
                },
                {
                  "x": 8.627,
                  "y": 907.563
                },
                {
                  "x": 8.184,
                  "y": 907.676
                },
                {
                  "x": 7.875,
                  "y": 907.875
                },
                {
                  "x": 7.676,
                  "y": 908.184
                },
                {
                  "x": 7.563000000000001,
                  "y": 908.627
                },
                {
                  "x": 7.512000000000001,
                  "y": 909.2279999999998
                },
                {
                  "x": 7.499,
                  "y": 910.011
                },
                {
                  "x": 7.5,
                  "y": 911.0
                }
              ]
            }
          ]
        },
        {
          "type": "go_straight",
          "startRoad": "road_2_4_2",
          "endRoad": "road_1_4_2",
          "direction": 2,
          "laneLinks": [
            {
              "startLaneIndex": 1,
              "endLaneIndex": 0,
              "points": [
                {
                  "x": 11.0,
                  "y": 904.5
                },
                {
                  "x": 9.592,
                  "y": 904.4159999999999
                },
                {
                  "x": 7.656,
                  "y": 904.188
                },
                {
                  "x": 5.324,
                  "y": 903.852
                },
                {
                  "x": 2.7279999999999998,
                  "y": 903.444
                },
                {
                  "x": 0.0,
                  "y": 903.0
                },
                {
                  "x": -2.7279999999999998,
                  "y": 902.556
                },
                {
                  "x": -5.323999999999999,
                  "y": 902.148
                },
                {
                  "x": -7.655999999999999,
                  "y": 901.8119999999999
                },
                {
                  "x": -9.592,
                  "y": 901.584
                },
                {
                  "x": -11.0,
                  "y": 901.5
                }
              ]
            },
            {
              "startLaneIndex": 1,
              "endLaneIndex": 1,
              "points": [
                {
                  "x": 11.0,
                  "y": 904.5
                },
                {
                  "x": 9.592,
                  "y": 904.5
                },
                {
                  "x": 7.656,
                  "y": 904.5
                },
                {
                  "x": 5.324,
                  "y": 904.5
                },
                {
                  "x": 2.7279999999999998,
                  "y": 904.5
                },
                {
                  "x": 0.0,
                  "y": 904.5
                },
                {
                  "x": -2.7279999999999998,
                  "y": 904.5
                },
                {
                  "x": -5.323999999999999,
                  "y": 904.5
                },
                {
                  "x": -7.655999999999999,
                  "y": 904.4999999999999
                },
                {
                  "x": -9.592,
                  "y": 904.5
                },
                {
                  "x": -11.0,
                  "y": 904.5
                }
              ]
            },
            {
              "startLaneIndex": 1,
              "endLaneIndex": 2,
              "points": [
                {
                  "x": 11.0,
                  "y": 904.5
                },
                {
                  "x": 9.592,
                  "y": 904.584
                },
                {
                  "x": 7.656,
                  "y": 904.812
                },
                {
                  "x": 5.324,
                  "y": 905.148
                },
                {
                  "x": 2.7279999999999998,
                  "y": 905.556
                },
                {
                  "x": 0.0,
                  "y": 906.0
                },
                {
                  "x": -2.7279999999999998,
                  "y": 906.444
                },
                {
                  "x": -5.323999999999999,
                  "y": 906.852
                },
                {
                  "x": -7.655999999999999,
                  "y": 907.1879999999999
                },
                {
                  "x": -9.592,
                  "y": 907.4159999999999
                },
                {
                  "x": -11.0,
                  "y": 907.5
                }
              ]
            }
          ]
        },
        {
          "type": "turn_left",
          "startRoad": "road_2_4_2",
          "endRoad": "road_1_4_3",
          "direction": 2,
          "laneLinks": [
            {
              "startLaneIndex": 0,
              "endLaneIndex": 0,
              "points": [
                {
                  "x": 11.0,
                  "y": 901.5
                },
                {
                  "x": 9.759,
                  "y": 901.249
                },
                {
                  "x": 8.292,
                  "y": 900.552
                },
                {
                  "x": 6.683,
                  "y": 899.4929999999999
                },
                {
                  "x": 5.016,
                  "y": 898.156
                },
                {
                  "x": 3.375,
                  "y": 896.625
                },
                {
                  "x": 1.844,
                  "y": 894.984
                },
                {
                  "x": 0.507000000000001,
                  "y": 893.317
                },
                {
                  "x": -0.551999999999999,
                  "y": 891.7079999999999
                },
                {
                  "x": -1.249,
                  "y": 890.241
                },
                {
                  "x": -1.5,
                  "y": 889.0
                }
              ]
            },
            {
              "startLaneIndex": 0,
              "endLaneIndex": 1,
              "points": [
                {
                  "x": 11.0,
                  "y": 901.5
                },
                {
                  "x": 9.675,
                  "y": 901.249
                },
                {
                  "x": 7.98,
                  "y": 900.552
                },
                {
                  "x": 6.035,
                  "y": 899.4929999999999
                },
                {
                  "x": 3.96,
                  "y": 898.156
                },
                {
                  "x": 1.875,
                  "y": 896.625
                },
                {
                  "x": -0.1,
                  "y": 894.984
                },
                {
                  "x": -1.844999999999999,
                  "y": 893.317
                },
                {
                  "x": -3.239999999999999,
                  "y": 891.7079999999999
                },
                {
                  "x": -4.165,
                  "y": 890.241
                },
                {
                  "x": -4.5,
                  "y": 889.0
                }
              ]
            },
            {
              "startLaneIndex": 0,
              "endLaneIndex": 2,
              "points": [
                {
                  "x": 11.0,
                  "y": 901.5
                },
                {
                  "x": 9.591,
                  "y": 901.249
                },
                {
                  "x": 7.668,
                  "y": 900.552
                },
                {
                  "x": 5.387,
                  "y": 899.4929999999999
                },
                {
                  "x": 2.904,
                  "y": 898.156
                },
                {
                  "x": 0.375,
                  "y": 896.625
                },
                {
                  "x": -2.044,
                  "y": 894.984
                },
                {
                  "x": -4.196999999999999,
                  "y": 893.317
                },
                {
                  "x": -5.927999999999999,
                  "y": 891.7079999999999
                },
                {
                  "x": -7.081,
                  "y": 890.241
                },
                {
                  "x": -7.5,
                  "y": 889.0
                }
              ]
            }
          ]
        },
        {
          "type": "turn_left",
          "startRoad": "road_1_5_3",
          "endRoad": "road_1_4_0",
          "direction": 3,
          "laneLinks": [
            {
              "startLaneIndex": 0,
              "endLaneIndex": 0,
              "points": [
                {
                  "x": -1.5,
                  "y": 911.0
                },
                {
                  "x": -1.249,
                  "y": 909.759
                },
                {
                  "x": -0.552,
                  "y": 908.292
                },
                {
                  "x": 0.507,
                  "y": 906.683
                },
                {
                  "x": 1.844,
                  "y": 905.016
                },
                {
                  "x": 3.375,
                  "y": 903.375
                },
                {
                  "x": 5.016,
                  "y": 901.844
                },
                {
                  "x": 6.683,
                  "y": 900.507
                },
                {
                  "x": 8.292,
                  "y": 899.4479999999999
                },
                {
                  "x": 9.759,
                  "y": 898.751
                },
                {
                  "x": 11.0,
                  "y": 898.5
                }
              ]
            },
            {
              "startLaneIndex": 0,
              "endLaneIndex": 1,
              "points": [
                {
                  "x": -1.5,
                  "y": 911.0
                },
                {
                  "x": -1.249,
                  "y": 909.675
                },
                {
                  "x": -0.552,
                  "y": 907.98
                },
                {
                  "x": 0.507,
                  "y": 906.035
                },
                {
                  "x": 1.844,
                  "y": 903.96
                },
                {
                  "x": 3.375,
                  "y": 901.875
                },
                {
                  "x": 5.016,
                  "y": 899.9
                },
                {
                  "x": 6.683,
                  "y": 898.155
                },
                {
                  "x": 8.292,
                  "y": 896.7599999999999
                },
                {
                  "x": 9.759,
                  "y": 895.835
                },
                {
                  "x": 11.0,
                  "y": 895.5
                }
              ]
            },
            {
              "startLaneIndex": 0,
              "endLaneIndex": 2,
              "points": [
                {
                  "x": -1.5,
                  "y": 911.0
                },
                {
                  "x": -1.249,
                  "y": 909.591
                },
                {
                  "x": -0.552,
                  "y": 907.668
                },
                {
                  "x": 0.507,
                  "y": 905.387
                },
                {
                  "x": 1.844,
                  "y": 902.904
                },
                {
                  "x": 3.375,
                  "y": 900.375
                },
                {
                  "x": 5.016,
                  "y": 897.956
                },
                {
                  "x": 6.683,
                  "y": 895.803
                },
                {
                  "x": 8.292,
                  "y": 894.0719999999999
                },
                {
                  "x": 9.759,
                  "y": 892.919
                },
                {
                  "x": 11.0,
                  "y": 892.5
                }
              ]
            }
          ]
        },
        {
          "type": "turn_right",
          "startRoad": "road_1_5_3",
          "endRoad": "road_1_4_2",
          "direction": 3,
          "laneLinks": [
            {
              "startLaneIndex": 2,
              "endLaneIndex": 0,
              "points": [
                {
                  "x": -7.5,
                  "y": 911.0
                },
                {
                  "x": -7.499,
                  "y": 909.843
                },
                {
                  "x": -7.512,
                  "y": 908.604
                },
                {
                  "x": -7.563,
                  "y": 907.331
                },
                {
                  "x": -7.676,
                  "y": 906.072
                },
                {
                  "x": -7.875,
                  "y": 904.875
                },
                {
                  "x": -8.184,
                  "y": 903.788
                },
                {
                  "x": -8.627,
                  "y": 902.859
                },
                {
                  "x": -9.228,
                  "y": 902.1359999999999
                },
                {
                  "x": -10.011,
                  "y": 901.667
                },
                {
                  "x": -11.0,
                  "y": 901.5
                }
              ]
            },
            {
              "startLaneIndex": 2,
              "endLaneIndex": 1,
              "points": [
                {
                  "x": -7.5,
                  "y": 911.0
                },
                {
                  "x": -7.499,
                  "y": 909.927
                },
                {
                  "x": -7.512,
                  "y": 908.9159999999999
                },
                {
                  "x": -7.563,
                  "y": 907.979
                },
                {
                  "x": -7.676,
                  "y": 907.128
                },
                {
                  "x": -7.875,
                  "y": 906.375
                },
                {
                  "x": -8.184,
                  "y": 905.732
                },
                {
                  "x": -8.627,
                  "y": 905.211
                },
                {
                  "x": -9.228,
                  "y": 904.8239999999998
                },
                {
                  "x": -10.011,
                  "y": 904.583
                },
                {
                  "x": -11.0,
                  "y": 904.5
                }
              ]
            },
            {
              "startLaneIndex": 2,
              "endLaneIndex": 2,
              "points": [
                {
                  "x": -7.5,
                  "y": 911.0
                },
                {
                  "x": -7.499,
                  "y": 910.011
                },
                {
                  "x": -7.512,
                  "y": 909.228
                },
                {
                  "x": -7.563,
                  "y": 908.627
                },
                {
                  "x": -7.676,
                  "y": 908.184
                },
                {
                  "x": -7.875,
                  "y": 907.875
                },
                {
                  "x": -8.184,
                  "y": 907.676
                },
                {
                  "x": -8.627,
                  "y": 907.563
                },
                {
                  "x": -9.228,
                  "y": 907.512
                },
                {
                  "x": -10.011,
                  "y": 907.499
                },
                {
                  "x": -11.0,
                  "y": 907.5
                }
              ]
            }
          ]
        },
        {
          "type": "go_straight",
          "startRoad": "road_1_5_3",
          "endRoad": "road_1_4_3",
          "direction": 3,
          "laneLinks": [
            {
              "startLaneIndex": 1,
              "endLaneIndex": 0,
              "points": [
                {
                  "x": -4.5,
                  "y": 911.0
                },
                {
                  "x": -4.416,
                  "y": 909.592
                },
                {
                  "x": -4.188,
                  "y": 907.656
                },
                {
                  "x": -3.852,
                  "y": 905.324
                },
                {
                  "x": -3.444,
                  "y": 902.728
                },
                {
                  "x": -3.0,
                  "y": 900.0
                },
                {
                  "x": -2.556,
                  "y": 897.272
                },
                {
                  "x": -2.148,
                  "y": 894.676
                },
                {
                  "x": -1.811999999999999,
                  "y": 892.3439999999999
                },
                {
                  "x": -1.584,
                  "y": 890.408
                },
                {
                  "x": -1.5,
                  "y": 889.0
                }
              ]
            },
            {
              "startLaneIndex": 1,
              "endLaneIndex": 1,
              "points": [
                {
                  "x": -4.5,
                  "y": 911.0
                },
                {
                  "x": -4.5,
                  "y": 909.592
                },
                {
                  "x": -4.5,
                  "y": 907.656
                },
                {
                  "x": -4.5,
                  "y": 905.324
                },
                {
                  "x": -4.5,
                  "y": 902.728
                },
                {
                  "x": -4.5,
                  "y": 900.0
                },
                {
                  "x": -4.5,
                  "y": 897.272
                },
                {
                  "x": -4.5,
                  "y": 894.676
                },
                {
                  "x": -4.499999999999999,
                  "y": 892.3439999999999
                },
                {
                  "x": -4.5,
                  "y": 890.408
                },
                {
                  "x": -4.5,
                  "y": 889.0
                }
              ]
            },
            {
              "startLaneIndex": 1,
              "endLaneIndex": 2,
              "points": [
                {
                  "x": -4.5,
                  "y": 911.0
                },
                {
                  "x": -4.584,
                  "y": 909.592
                },
                {
                  "x": -4.812,
                  "y": 907.656
                },
                {
                  "x": -5.148,
                  "y": 905.324
                },
                {
                  "x": -5.556,
                  "y": 902.728
                },
                {
                  "x": -6.0,
                  "y": 900.0
                },
                {
                  "x": -6.444,
                  "y": 897.272
                },
                {
                  "x": -6.852,
                  "y": 894.676
                },
                {
                  "x": -7.187999999999999,
                  "y": 892.3439999999999
                },
                {
                  "x": -7.416,
                  "y": 890.408
                },
                {
                  "x": -7.5,
                  "y": 889.0
                }
              ]
            }
          ]
        }
      ],
      "trafficLight": {
        "roadLinkIndices": [
          0,
          1,
          2,
          3,
          4,
          5,
          6,
          7,
          8,
          9,
          10,
          11
        ],
        "lightphases": [
          {
            "time": 5,
            "availableRoadLinks": [
              10,
              2,
              3,
              6
            ]
          },
          {
            "time": 30,
            "availableRoadLinks": [
              0,
              2,
              3,
              6,
              7,
              10
            ]
          },
          {
            "time": 30,
            "availableRoadLinks": [
              2,
              3,
              4,
              6,
              10,
              11
            ]
          },
          {
            "time": 30,
            "availableRoadLinks": [
              1,
              2,
              3,
              6,
              8,
              10
            ]
          },
          {
            "time": 30,
            "availableRoadLinks": [
              2,
              3,
              5,
              6,
              9,
              10
            ]
          },
          {
            "time": 30,
            "availableRoadLinks": [
              0,
              1,
              2,
              3,
              6,
              10
            ]
          },
          {
            "time": 30,
            "availableRoadLinks": [
              2,
              3,
              6,
              7,
              8,
              10
            ]
          },
          {
            "time": 30,
            "availableRoadLinks": [
              2,
              3,
              4,
              5,
              6,
              10
            ]
          },
          {
            "time": 30,
            "availableRoadLinks": [
              2,
              3,
              6,
              9,
              10,
              11
            ]
          }
        ]
      },
      "virtual": false
    },
    {
      "id": "intersection_1_5",
      "point": {
        "x": 0,
        "y": 1200
      },
      "width": 11,
      "roads": [
        "road_0_5_0",
        "road_1_4_1",
        "road_2_5_2",
        "road_1_6_3",
        "road_1_5_0",
        "road_1_5_1",
        "road_1_5_2",
        "road_1_5_3"
      ],
      "roadLinks": [
        {
          "type": "go_straight",
          "startRoad": "road_0_5_0",
          "endRoad": "road_1_5_0",
          "direction": 0,
          "laneLinks": [
            {
              "startLaneIndex": 1,
              "endLaneIndex": 0,
              "points": [
                {
                  "x": -11.0,
                  "y": 1195.5
                },
                {
                  "x": -9.592,
                  "y": 1195.584
                },
                {
                  "x": -7.656,
                  "y": 1195.812
                },
                {
                  "x": -5.324,
                  "y": 1196.148
                },
                {
                  "x": -2.7279999999999998,
                  "y": 1196.556
                },
                {
                  "x": 0.0,
                  "y": 1197.0
                },
                {
                  "x": 2.7279999999999998,
                  "y": 1197.444
                },
                {
                  "x": 5.323999999999999,
                  "y": 1197.852
                },
                {
                  "x": 7.655999999999999,
                  "y": 1198.188
                },
                {
                  "x": 9.592,
                  "y": 1198.416
                },
                {
                  "x": 11.0,
                  "y": 1198.5
                }
              ]
            },
            {
              "startLaneIndex": 1,
              "endLaneIndex": 1,
              "points": [
                {
                  "x": -11.0,
                  "y": 1195.5
                },
                {
                  "x": -9.592,
                  "y": 1195.5
                },
                {
                  "x": -7.656,
                  "y": 1195.5
                },
                {
                  "x": -5.324,
                  "y": 1195.5
                },
                {
                  "x": -2.7279999999999998,
                  "y": 1195.5
                },
                {
                  "x": 0.0,
                  "y": 1195.5
                },
                {
                  "x": 2.7279999999999998,
                  "y": 1195.5
                },
                {
                  "x": 5.323999999999999,
                  "y": 1195.5
                },
                {
                  "x": 7.655999999999999,
                  "y": 1195.5
                },
                {
                  "x": 9.592,
                  "y": 1195.5
                },
                {
                  "x": 11.0,
                  "y": 1195.5
                }
              ]
            },
            {
              "startLaneIndex": 1,
              "endLaneIndex": 2,
              "points": [
                {
                  "x": -11.0,
                  "y": 1195.5
                },
                {
                  "x": -9.592,
                  "y": 1195.416
                },
                {
                  "x": -7.656,
                  "y": 1195.188
                },
                {
                  "x": -5.324,
                  "y": 1194.852
                },
                {
                  "x": -2.7279999999999998,
                  "y": 1194.444
                },
                {
                  "x": 0.0,
                  "y": 1194.0
                },
                {
                  "x": 2.7279999999999998,
                  "y": 1193.556
                },
                {
                  "x": 5.323999999999999,
                  "y": 1193.148
                },
                {
                  "x": 7.655999999999999,
                  "y": 1192.812
                },
                {
                  "x": 9.592,
                  "y": 1192.584
                },
                {
                  "x": 11.0,
                  "y": 1192.5
                }
              ]
            }
          ]
        },
        {
          "type": "turn_left",
          "startRoad": "road_0_5_0",
          "endRoad": "road_1_5_1",
          "direction": 0,
          "laneLinks": [
            {
              "startLaneIndex": 0,
              "endLaneIndex": 0,
              "points": [
                {
                  "x": -11.0,
                  "y": 1198.5
                },
                {
                  "x": -9.759,
                  "y": 1198.751
                },
                {
                  "x": -8.292,
                  "y": 1199.448
                },
                {
                  "x": -6.683,
                  "y": 1200.507
                },
                {
                  "x": -5.016,
                  "y": 1201.844
                },
                {
                  "x": -3.375,
                  "y": 1203.375
                },
                {
                  "x": -1.844,
                  "y": 1205.016
                },
                {
                  "x": -0.507000000000001,
                  "y": 1206.683
                },
                {
                  "x": 0.551999999999999,
                  "y": 1208.292
                },
                {
                  "x": 1.249,
                  "y": 1209.759
                },
                {
                  "x": 1.5,
                  "y": 1211.0
                }
              ]
            },
            {
              "startLaneIndex": 0,
              "endLaneIndex": 1,
              "points": [
                {
                  "x": -11.0,
                  "y": 1198.5
                },
                {
                  "x": -9.675,
                  "y": 1198.751
                },
                {
                  "x": -7.98,
                  "y": 1199.448
                },
                {
                  "x": -6.035,
                  "y": 1200.507
                },
                {
                  "x": -3.96,
                  "y": 1201.844
                },
                {
                  "x": -1.875,
                  "y": 1203.375
                },
                {
                  "x": 0.1,
                  "y": 1205.016
                },
                {
                  "x": 1.844999999999999,
                  "y": 1206.683
                },
                {
                  "x": 3.239999999999999,
                  "y": 1208.292
                },
                {
                  "x": 4.165,
                  "y": 1209.759
                },
                {
                  "x": 4.5,
                  "y": 1211.0
                }
              ]
            },
            {
              "startLaneIndex": 0,
              "endLaneIndex": 2,
              "points": [
                {
                  "x": -11.0,
                  "y": 1198.5
                },
                {
                  "x": -9.591,
                  "y": 1198.751
                },
                {
                  "x": -7.668,
                  "y": 1199.448
                },
                {
                  "x": -5.387,
                  "y": 1200.507
                },
                {
                  "x": -2.904,
                  "y": 1201.844
                },
                {
                  "x": -0.375,
                  "y": 1203.375
                },
                {
                  "x": 2.044,
                  "y": 1205.016
                },
                {
                  "x": 4.196999999999999,
                  "y": 1206.683
                },
                {
                  "x": 5.927999999999999,
                  "y": 1208.292
                },
                {
                  "x": 7.081,
                  "y": 1209.759
                },
                {
                  "x": 7.5,
                  "y": 1211.0
                }
              ]
            }
          ]
        },
        {
          "type": "turn_right",
          "startRoad": "road_0_5_0",
          "endRoad": "road_1_5_3",
          "direction": 0,
          "laneLinks": [
            {
              "startLaneIndex": 2,
              "endLaneIndex": 0,
              "points": [
                {
                  "x": -11.0,
                  "y": 1192.5
                },
                {
                  "x": -9.843,
                  "y": 1192.501
                },
                {
                  "x": -8.604,
                  "y": 1192.488
                },
                {
                  "x": -7.3309999999999995,
                  "y": 1192.437
                },
                {
                  "x": -6.072,
                  "y": 1192.324
                },
                {
                  "x": -4.875,
                  "y": 1192.125
                },
                {
                  "x": -3.788,
                  "y": 1191.816
                },
                {
                  "x": -2.859000000000001,
                  "y": 1191.373
                },
                {
                  "x": -2.136000000000001,
                  "y": 1190.772
                },
                {
                  "x": -1.6669999999999998,
                  "y": 1189.989
                },
                {
                  "x": -1.5,
                  "y": 1189.0
                }
              ]
            },
            {
              "startLaneIndex": 2,
              "endLaneIndex": 1,
              "points": [
                {
                  "x": -11.0,
                  "y": 1192.5
                },
                {
                  "x": -9.927,
                  "y": 1192.501
                },
                {
                  "x": -8.916,
                  "y": 1192.488
                },
                {
                  "x": -7.979,
                  "y": 1192.437
                },
                {
                  "x": -7.128,
                  "y": 1192.324
                },
                {
                  "x": -6.375,
                  "y": 1192.125
                },
                {
                  "x": -5.732,
                  "y": 1191.816
                },
                {
                  "x": -5.211000000000001,
                  "y": 1191.373
                },
                {
                  "x": -4.824000000000001,
                  "y": 1190.772
                },
                {
                  "x": -4.583,
                  "y": 1189.989
                },
                {
                  "x": -4.5,
                  "y": 1189.0
                }
              ]
            },
            {
              "startLaneIndex": 2,
              "endLaneIndex": 2,
              "points": [
                {
                  "x": -11.0,
                  "y": 1192.5
                },
                {
                  "x": -10.011,
                  "y": 1192.501
                },
                {
                  "x": -9.228,
                  "y": 1192.488
                },
                {
                  "x": -8.627,
                  "y": 1192.437
                },
                {
                  "x": -8.184,
                  "y": 1192.324
                },
                {
                  "x": -7.875,
                  "y": 1192.125
                },
                {
                  "x": -7.676,
                  "y": 1191.816
                },
                {
                  "x": -7.563000000000001,
                  "y": 1191.373
                },
                {
                  "x": -7.512000000000001,
                  "y": 1190.772
                },
                {
                  "x": -7.499,
                  "y": 1189.989
                },
                {
                  "x": -7.5,
                  "y": 1189.0
                }
              ]
            }
          ]
        },
        {
          "type": "turn_right",
          "startRoad": "road_1_4_1",
          "endRoad": "road_1_5_0",
          "direction": 1,
          "laneLinks": [
            {
              "startLaneIndex": 2,
              "endLaneIndex": 0,
              "points": [
                {
                  "x": 7.5,
                  "y": 1189.0
                },
                {
                  "x": 7.499,
                  "y": 1190.157
                },
                {
                  "x": 7.512,
                  "y": 1191.396
                },
                {
                  "x": 7.563,
                  "y": 1192.669
                },
                {
                  "x": 7.676,
                  "y": 1193.9279999999999
                },
                {
                  "x": 7.875,
                  "y": 1195.125
                },
                {
                  "x": 8.184,
                  "y": 1196.212
                },
                {
                  "x": 8.627,
                  "y": 1197.141
                },
                {
                  "x": 9.228,
                  "y": 1197.864
                },
                {
                  "x": 10.011,
                  "y": 1198.333
                },
                {
                  "x": 11.0,
                  "y": 1198.5
                }
              ]
            },
            {
              "startLaneIndex": 2,
              "endLaneIndex": 1,
              "points": [
                {
                  "x": 7.5,
                  "y": 1189.0
                },
                {
                  "x": 7.499,
                  "y": 1190.073
                },
                {
                  "x": 7.512,
                  "y": 1191.084
                },
                {
                  "x": 7.563,
                  "y": 1192.021
                },
                {
                  "x": 7.676,
                  "y": 1192.872
                },
                {
                  "x": 7.875,
                  "y": 1193.625
                },
                {
                  "x": 8.184,
                  "y": 1194.268
                },
                {
                  "x": 8.627,
                  "y": 1194.789
                },
                {
                  "x": 9.228,
                  "y": 1195.176
                },
                {
                  "x": 10.011,
                  "y": 1195.417
                },
                {
                  "x": 11.0,
                  "y": 1195.5
                }
              ]
            },
            {
              "startLaneIndex": 2,
              "endLaneIndex": 2,
              "points": [
                {
                  "x": 7.5,
                  "y": 1189.0
                },
                {
                  "x": 7.499,
                  "y": 1189.989
                },
                {
                  "x": 7.512,
                  "y": 1190.772
                },
                {
                  "x": 7.563,
                  "y": 1191.373
                },
                {
                  "x": 7.676,
                  "y": 1191.816
                },
                {
                  "x": 7.875,
                  "y": 1192.125
                },
                {
                  "x": 8.184,
                  "y": 1192.324
                },
                {
                  "x": 8.627,
                  "y": 1192.437
                },
                {
                  "x": 9.228,
                  "y": 1192.488
                },
                {
                  "x": 10.011,
                  "y": 1192.501
                },
                {
                  "x": 11.0,
                  "y": 1192.5
                }
              ]
            }
          ]
        },
        {
          "type": "go_straight",
          "startRoad": "road_1_4_1",
          "endRoad": "road_1_5_1",
          "direction": 1,
          "laneLinks": [
            {
              "startLaneIndex": 1,
              "endLaneIndex": 0,
              "points": [
                {
                  "x": 4.5,
                  "y": 1189.0
                },
                {
                  "x": 4.416,
                  "y": 1190.408
                },
                {
                  "x": 4.188,
                  "y": 1192.344
                },
                {
                  "x": 3.852,
                  "y": 1194.676
                },
                {
                  "x": 3.444,
                  "y": 1197.272
                },
                {
                  "x": 3.0,
                  "y": 1200.0
                },
                {
                  "x": 2.556,
                  "y": 1202.728
                },
                {
                  "x": 2.148,
                  "y": 1205.324
                },
                {
                  "x": 1.811999999999999,
                  "y": 1207.656
                },
                {
                  "x": 1.584,
                  "y": 1209.592
                },
                {
                  "x": 1.5,
                  "y": 1211.0
                }
              ]
            },
            {
              "startLaneIndex": 1,
              "endLaneIndex": 1,
              "points": [
                {
                  "x": 4.5,
                  "y": 1189.0
                },
                {
                  "x": 4.5,
                  "y": 1190.408
                },
                {
                  "x": 4.5,
                  "y": 1192.344
                },
                {
                  "x": 4.5,
                  "y": 1194.676
                },
                {
                  "x": 4.5,
                  "y": 1197.272
                },
                {
                  "x": 4.5,
                  "y": 1200.0
                },
                {
                  "x": 4.5,
                  "y": 1202.728
                },
                {
                  "x": 4.5,
                  "y": 1205.324
                },
                {
                  "x": 4.499999999999999,
                  "y": 1207.656
                },
                {
                  "x": 4.5,
                  "y": 1209.592
                },
                {
                  "x": 4.5,
                  "y": 1211.0
                }
              ]
            },
            {
              "startLaneIndex": 1,
              "endLaneIndex": 2,
              "points": [
                {
                  "x": 4.5,
                  "y": 1189.0
                },
                {
                  "x": 4.584,
                  "y": 1190.408
                },
                {
                  "x": 4.812,
                  "y": 1192.344
                },
                {
                  "x": 5.148,
                  "y": 1194.676
                },
                {
                  "x": 5.556,
                  "y": 1197.272
                },
                {
                  "x": 6.0,
                  "y": 1200.0
                },
                {
                  "x": 6.444,
                  "y": 1202.728
                },
                {
                  "x": 6.852,
                  "y": 1205.324
                },
                {
                  "x": 7.187999999999999,
                  "y": 1207.656
                },
                {
                  "x": 7.416,
                  "y": 1209.592
                },
                {
                  "x": 7.5,
                  "y": 1211.0
                }
              ]
            }
          ]
        },
        {
          "type": "turn_left",
          "startRoad": "road_1_4_1",
          "endRoad": "road_1_5_2",
          "direction": 1,
          "laneLinks": [
            {
              "startLaneIndex": 0,
              "endLaneIndex": 0,
              "points": [
                {
                  "x": 1.5,
                  "y": 1189.0
                },
                {
                  "x": 1.249,
                  "y": 1190.241
                },
                {
                  "x": 0.552,
                  "y": 1191.708
                },
                {
                  "x": -0.507,
                  "y": 1193.317
                },
                {
                  "x": -1.844,
                  "y": 1194.984
                },
                {
                  "x": -3.375,
                  "y": 1196.625
                },
                {
                  "x": -5.016,
                  "y": 1198.156
                },
                {
                  "x": -6.683,
                  "y": 1199.493
                },
                {
                  "x": -8.292,
                  "y": 1200.552
                },
                {
                  "x": -9.759,
                  "y": 1201.249
                },
                {
                  "x": -11.0,
                  "y": 1201.5
                }
              ]
            },
            {
              "startLaneIndex": 0,
              "endLaneIndex": 1,
              "points": [
                {
                  "x": 1.5,
                  "y": 1189.0
                },
                {
                  "x": 1.249,
                  "y": 1190.325
                },
                {
                  "x": 0.552,
                  "y": 1192.02
                },
                {
                  "x": -0.507,
                  "y": 1193.965
                },
                {
                  "x": -1.844,
                  "y": 1196.04
                },
                {
                  "x": -3.375,
                  "y": 1198.125
                },
                {
                  "x": -5.016,
                  "y": 1200.1
                },
                {
                  "x": -6.683,
                  "y": 1201.845
                },
                {
                  "x": -8.292,
                  "y": 1203.24
                },
                {
                  "x": -9.759,
                  "y": 1204.165
                },
                {
                  "x": -11.0,
                  "y": 1204.5
                }
              ]
            },
            {
              "startLaneIndex": 0,
              "endLaneIndex": 2,
              "points": [
                {
                  "x": 1.5,
                  "y": 1189.0
                },
                {
                  "x": 1.249,
                  "y": 1190.409
                },
                {
                  "x": 0.552,
                  "y": 1192.3319999999999
                },
                {
                  "x": -0.507,
                  "y": 1194.613
                },
                {
                  "x": -1.844,
                  "y": 1197.096
                },
                {
                  "x": -3.375,
                  "y": 1199.625
                },
                {
                  "x": -5.016,
                  "y": 1202.044
                },
                {
                  "x": -6.683,
                  "y": 1204.197
                },
                {
                  "x": -8.292,
                  "y": 1205.9279999999999
                },
                {
                  "x": -9.759,
                  "y": 1207.081
                },
                {
                  "x": -11.0,
                  "y": 1207.5
                }
              ]
            }
          ]
        },
        {
          "type": "turn_right",
          "startRoad": "road_2_5_2",
          "endRoad": "road_1_5_1",
          "direction": 2,
          "laneLinks": [
            {
              "startLaneIndex": 2,
              "endLaneIndex": 0,
              "points": [
                {
                  "x": 11.0,
                  "y": 1207.5
                },
                {
                  "x": 9.843,
                  "y": 1207.499
                },
                {
                  "x": 8.604,
                  "y": 1207.512
                },
                {
                  "x": 7.3309999999999995,
                  "y": 1207.563
                },
                {
                  "x": 6.072,
                  "y": 1207.676
                },
                {
                  "x": 4.875,
                  "y": 1207.875
                },
                {
                  "x": 3.788,
                  "y": 1208.184
                },
                {
                  "x": 2.859000000000001,
                  "y": 1208.627
                },
                {
                  "x": 2.136000000000001,
                  "y": 1209.228
                },
                {
                  "x": 1.6669999999999998,
                  "y": 1210.011
                },
                {
                  "x": 1.5,
                  "y": 1211.0
                }
              ]
            },
            {
              "startLaneIndex": 2,
              "endLaneIndex": 1,
              "points": [
                {
                  "x": 11.0,
                  "y": 1207.5
                },
                {
                  "x": 9.927,
                  "y": 1207.499
                },
                {
                  "x": 8.916,
                  "y": 1207.512
                },
                {
                  "x": 7.979,
                  "y": 1207.563
                },
                {
                  "x": 7.128,
                  "y": 1207.676
                },
                {
                  "x": 6.375,
                  "y": 1207.875
                },
                {
                  "x": 5.732,
                  "y": 1208.184
                },
                {
                  "x": 5.211000000000001,
                  "y": 1208.627
                },
                {
                  "x": 4.824000000000001,
                  "y": 1209.228
                },
                {
                  "x": 4.583,
                  "y": 1210.011
                },
                {
                  "x": 4.5,
                  "y": 1211.0
                }
              ]
            },
            {
              "startLaneIndex": 2,
              "endLaneIndex": 2,
              "points": [
                {
                  "x": 11.0,
                  "y": 1207.5
                },
                {
                  "x": 10.011,
                  "y": 1207.499
                },
                {
                  "x": 9.228,
                  "y": 1207.512
                },
                {
                  "x": 8.627,
                  "y": 1207.563
                },
                {
                  "x": 8.184,
                  "y": 1207.676
                },
                {
                  "x": 7.875,
                  "y": 1207.875
                },
                {
                  "x": 7.676,
                  "y": 1208.184
                },
                {
                  "x": 7.563000000000001,
                  "y": 1208.627
                },
                {
                  "x": 7.512000000000001,
                  "y": 1209.228
                },
                {
                  "x": 7.499,
                  "y": 1210.011
                },
                {
                  "x": 7.5,
                  "y": 1211.0
                }
              ]
            }
          ]
        },
        {
          "type": "go_straight",
          "startRoad": "road_2_5_2",
          "endRoad": "road_1_5_2",
          "direction": 2,
          "laneLinks": [
            {
              "startLaneIndex": 1,
              "endLaneIndex": 0,
              "points": [
                {
                  "x": 11.0,
                  "y": 1204.5
                },
                {
                  "x": 9.592,
                  "y": 1204.416
                },
                {
                  "x": 7.656,
                  "y": 1204.188
                },
                {
                  "x": 5.324,
                  "y": 1203.852
                },
                {
                  "x": 2.7279999999999998,
                  "y": 1203.444
                },
                {
                  "x": 0.0,
                  "y": 1203.0
                },
                {
                  "x": -2.7279999999999998,
                  "y": 1202.556
                },
                {
                  "x": -5.323999999999999,
                  "y": 1202.148
                },
                {
                  "x": -7.655999999999999,
                  "y": 1201.812
                },
                {
                  "x": -9.592,
                  "y": 1201.584
                },
                {
                  "x": -11.0,
                  "y": 1201.5
                }
              ]
            },
            {
              "startLaneIndex": 1,
              "endLaneIndex": 1,
              "points": [
                {
                  "x": 11.0,
                  "y": 1204.5
                },
                {
                  "x": 9.592,
                  "y": 1204.5
                },
                {
                  "x": 7.656,
                  "y": 1204.5
                },
                {
                  "x": 5.324,
                  "y": 1204.5
                },
                {
                  "x": 2.7279999999999998,
                  "y": 1204.5
                },
                {
                  "x": 0.0,
                  "y": 1204.5
                },
                {
                  "x": -2.7279999999999998,
                  "y": 1204.5
                },
                {
                  "x": -5.323999999999999,
                  "y": 1204.5
                },
                {
                  "x": -7.655999999999999,
                  "y": 1204.5
                },
                {
                  "x": -9.592,
                  "y": 1204.5
                },
                {
                  "x": -11.0,
                  "y": 1204.5
                }
              ]
            },
            {
              "startLaneIndex": 1,
              "endLaneIndex": 2,
              "points": [
                {
                  "x": 11.0,
                  "y": 1204.5
                },
                {
                  "x": 9.592,
                  "y": 1204.584
                },
                {
                  "x": 7.656,
                  "y": 1204.812
                },
                {
                  "x": 5.324,
                  "y": 1205.148
                },
                {
                  "x": 2.7279999999999998,
                  "y": 1205.556
                },
                {
                  "x": 0.0,
                  "y": 1206.0
                },
                {
                  "x": -2.7279999999999998,
                  "y": 1206.444
                },
                {
                  "x": -5.323999999999999,
                  "y": 1206.852
                },
                {
                  "x": -7.655999999999999,
                  "y": 1207.188
                },
                {
                  "x": -9.592,
                  "y": 1207.416
                },
                {
                  "x": -11.0,
                  "y": 1207.5
                }
              ]
            }
          ]
        },
        {
          "type": "turn_left",
          "startRoad": "road_2_5_2",
          "endRoad": "road_1_5_3",
          "direction": 2,
          "laneLinks": [
            {
              "startLaneIndex": 0,
              "endLaneIndex": 0,
              "points": [
                {
                  "x": 11.0,
                  "y": 1201.5
                },
                {
                  "x": 9.759,
                  "y": 1201.249
                },
                {
                  "x": 8.292,
                  "y": 1200.552
                },
                {
                  "x": 6.683,
                  "y": 1199.493
                },
                {
                  "x": 5.016,
                  "y": 1198.156
                },
                {
                  "x": 3.375,
                  "y": 1196.625
                },
                {
                  "x": 1.844,
                  "y": 1194.984
                },
                {
                  "x": 0.507000000000001,
                  "y": 1193.317
                },
                {
                  "x": -0.551999999999999,
                  "y": 1191.708
                },
                {
                  "x": -1.249,
                  "y": 1190.241
                },
                {
                  "x": -1.5,
                  "y": 1189.0
                }
              ]
            },
            {
              "startLaneIndex": 0,
              "endLaneIndex": 1,
              "points": [
                {
                  "x": 11.0,
                  "y": 1201.5
                },
                {
                  "x": 9.675,
                  "y": 1201.249
                },
                {
                  "x": 7.98,
                  "y": 1200.552
                },
                {
                  "x": 6.035,
                  "y": 1199.493
                },
                {
                  "x": 3.96,
                  "y": 1198.156
                },
                {
                  "x": 1.875,
                  "y": 1196.625
                },
                {
                  "x": -0.1,
                  "y": 1194.984
                },
                {
                  "x": -1.844999999999999,
                  "y": 1193.317
                },
                {
                  "x": -3.239999999999999,
                  "y": 1191.708
                },
                {
                  "x": -4.165,
                  "y": 1190.241
                },
                {
                  "x": -4.5,
                  "y": 1189.0
                }
              ]
            },
            {
              "startLaneIndex": 0,
              "endLaneIndex": 2,
              "points": [
                {
                  "x": 11.0,
                  "y": 1201.5
                },
                {
                  "x": 9.591,
                  "y": 1201.249
                },
                {
                  "x": 7.668,
                  "y": 1200.552
                },
                {
                  "x": 5.387,
                  "y": 1199.493
                },
                {
                  "x": 2.904,
                  "y": 1198.156
                },
                {
                  "x": 0.375,
                  "y": 1196.625
                },
                {
                  "x": -2.044,
                  "y": 1194.984
                },
                {
                  "x": -4.196999999999999,
                  "y": 1193.317
                },
                {
                  "x": -5.927999999999999,
                  "y": 1191.708
                },
                {
                  "x": -7.081,
                  "y": 1190.241
                },
                {
                  "x": -7.5,
                  "y": 1189.0
                }
              ]
            }
          ]
        },
        {
          "type": "turn_left",
          "startRoad": "road_1_6_3",
          "endRoad": "road_1_5_0",
          "direction": 3,
          "laneLinks": [
            {
              "startLaneIndex": 0,
              "endLaneIndex": 0,
              "points": [
                {
                  "x": -1.5,
                  "y": 1211.0
                },
                {
                  "x": -1.249,
                  "y": 1209.759
                },
                {
                  "x": -0.552,
                  "y": 1208.292
                },
                {
                  "x": 0.507,
                  "y": 1206.683
                },
                {
                  "x": 1.844,
                  "y": 1205.016
                },
                {
                  "x": 3.375,
                  "y": 1203.375
                },
                {
                  "x": 5.016,
                  "y": 1201.844
                },
                {
                  "x": 6.683,
                  "y": 1200.507
                },
                {
                  "x": 8.292,
                  "y": 1199.448
                },
                {
                  "x": 9.759,
                  "y": 1198.751
                },
                {
                  "x": 11.0,
                  "y": 1198.5
                }
              ]
            },
            {
              "startLaneIndex": 0,
              "endLaneIndex": 1,
              "points": [
                {
                  "x": -1.5,
                  "y": 1211.0
                },
                {
                  "x": -1.249,
                  "y": 1209.675
                },
                {
                  "x": -0.552,
                  "y": 1207.98
                },
                {
                  "x": 0.507,
                  "y": 1206.035
                },
                {
                  "x": 1.844,
                  "y": 1203.96
                },
                {
                  "x": 3.375,
                  "y": 1201.875
                },
                {
                  "x": 5.016,
                  "y": 1199.9
                },
                {
                  "x": 6.683,
                  "y": 1198.155
                },
                {
                  "x": 8.292,
                  "y": 1196.76
                },
                {
                  "x": 9.759,
                  "y": 1195.835
                },
                {
                  "x": 11.0,
                  "y": 1195.5
                }
              ]
            },
            {
              "startLaneIndex": 0,
              "endLaneIndex": 2,
              "points": [
                {
                  "x": -1.5,
                  "y": 1211.0
                },
                {
                  "x": -1.249,
                  "y": 1209.591
                },
                {
                  "x": -0.552,
                  "y": 1207.668
                },
                {
                  "x": 0.507,
                  "y": 1205.387
                },
                {
                  "x": 1.844,
                  "y": 1202.904
                },
                {
                  "x": 3.375,
                  "y": 1200.375
                },
                {
                  "x": 5.016,
                  "y": 1197.956
                },
                {
                  "x": 6.683,
                  "y": 1195.8029999999999
                },
                {
                  "x": 8.292,
                  "y": 1194.072
                },
                {
                  "x": 9.759,
                  "y": 1192.919
                },
                {
                  "x": 11.0,
                  "y": 1192.5
                }
              ]
            }
          ]
        },
        {
          "type": "turn_right",
          "startRoad": "road_1_6_3",
          "endRoad": "road_1_5_2",
          "direction": 3,
          "laneLinks": [
            {
              "startLaneIndex": 2,
              "endLaneIndex": 0,
              "points": [
                {
                  "x": -7.5,
                  "y": 1211.0
                },
                {
                  "x": -7.499,
                  "y": 1209.843
                },
                {
                  "x": -7.512,
                  "y": 1208.604
                },
                {
                  "x": -7.563,
                  "y": 1207.331
                },
                {
                  "x": -7.676,
                  "y": 1206.072
                },
                {
                  "x": -7.875,
                  "y": 1204.875
                },
                {
                  "x": -8.184,
                  "y": 1203.788
                },
                {
                  "x": -8.627,
                  "y": 1202.859
                },
                {
                  "x": -9.228,
                  "y": 1202.136
                },
                {
                  "x": -10.011,
                  "y": 1201.667
                },
                {
                  "x": -11.0,
                  "y": 1201.5
                }
              ]
            },
            {
              "startLaneIndex": 2,
              "endLaneIndex": 1,
              "points": [
                {
                  "x": -7.5,
                  "y": 1211.0
                },
                {
                  "x": -7.499,
                  "y": 1209.927
                },
                {
                  "x": -7.512,
                  "y": 1208.916
                },
                {
                  "x": -7.563,
                  "y": 1207.979
                },
                {
                  "x": -7.676,
                  "y": 1207.128
                },
                {
                  "x": -7.875,
                  "y": 1206.375
                },
                {
                  "x": -8.184,
                  "y": 1205.732
                },
                {
                  "x": -8.627,
                  "y": 1205.211
                },
                {
                  "x": -9.228,
                  "y": 1204.824
                },
                {
                  "x": -10.011,
                  "y": 1204.583
                },
                {
                  "x": -11.0,
                  "y": 1204.5
                }
              ]
            },
            {
              "startLaneIndex": 2,
              "endLaneIndex": 2,
              "points": [
                {
                  "x": -7.5,
                  "y": 1211.0
                },
                {
                  "x": -7.499,
                  "y": 1210.011
                },
                {
                  "x": -7.512,
                  "y": 1209.228
                },
                {
                  "x": -7.563,
                  "y": 1208.627
                },
                {
                  "x": -7.676,
                  "y": 1208.184
                },
                {
                  "x": -7.875,
                  "y": 1207.875
                },
                {
                  "x": -8.184,
                  "y": 1207.676
                },
                {
                  "x": -8.627,
                  "y": 1207.563
                },
                {
                  "x": -9.228,
                  "y": 1207.512
                },
                {
                  "x": -10.011,
                  "y": 1207.499
                },
                {
                  "x": -11.0,
                  "y": 1207.5
                }
              ]
            }
          ]
        },
        {
          "type": "go_straight",
          "startRoad": "road_1_6_3",
          "endRoad": "road_1_5_3",
          "direction": 3,
          "laneLinks": [
            {
              "startLaneIndex": 1,
              "endLaneIndex": 0,
              "points": [
                {
                  "x": -4.5,
                  "y": 1211.0
                },
                {
                  "x": -4.416,
                  "y": 1209.592
                },
                {
                  "x": -4.188,
                  "y": 1207.656
                },
                {
                  "x": -3.852,
                  "y": 1205.324
                },
                {
                  "x": -3.444,
                  "y": 1202.728
                },
                {
                  "x": -3.0,
                  "y": 1200.0
                },
                {
                  "x": -2.556,
                  "y": 1197.272
                },
                {
                  "x": -2.148,
                  "y": 1194.676
                },
                {
                  "x": -1.811999999999999,
                  "y": 1192.344
                },
                {
                  "x": -1.584,
                  "y": 1190.408
                },
                {
                  "x": -1.5,
                  "y": 1189.0
                }
              ]
            },
            {
              "startLaneIndex": 1,
              "endLaneIndex": 1,
              "points": [
                {
                  "x": -4.5,
                  "y": 1211.0
                },
                {
                  "x": -4.5,
                  "y": 1209.592
                },
                {
                  "x": -4.5,
                  "y": 1207.656
                },
                {
                  "x": -4.5,
                  "y": 1205.324
                },
                {
                  "x": -4.5,
                  "y": 1202.728
                },
                {
                  "x": -4.5,
                  "y": 1200.0
                },
                {
                  "x": -4.5,
                  "y": 1197.272
                },
                {
                  "x": -4.5,
                  "y": 1194.676
                },
                {
                  "x": -4.499999999999999,
                  "y": 1192.344
                },
                {
                  "x": -4.5,
                  "y": 1190.408
                },
                {
                  "x": -4.5,
                  "y": 1189.0
                }
              ]
            },
            {
              "startLaneIndex": 1,
              "endLaneIndex": 2,
              "points": [
                {
                  "x": -4.5,
                  "y": 1211.0
                },
                {
                  "x": -4.584,
                  "y": 1209.592
                },
                {
                  "x": -4.812,
                  "y": 1207.656
                },
                {
                  "x": -5.148,
                  "y": 1205.324
                },
                {
                  "x": -5.556,
                  "y": 1202.728
                },
                {
                  "x": -6.0,
                  "y": 1200.0
                },
                {
                  "x": -6.444,
                  "y": 1197.272
                },
                {
                  "x": -6.852,
                  "y": 1194.676
                },
                {
                  "x": -7.187999999999999,
                  "y": 1192.344
                },
                {
                  "x": -7.416,
                  "y": 1190.408
                },
                {
                  "x": -7.5,
                  "y": 1189.0
                }
              ]
            }
          ]
        }
      ],
      "trafficLight": {
        "roadLinkIndices": [
          0,
          1,
          2,
          3,
          4,
          5,
          6,
          7,
          8,
          9,
          10,
          11
        ],
        "lightphases": [
          {
            "time": 5,
            "availableRoadLinks": [
              10,
              2,
              3,
              6
            ]
          },
          {
            "time": 30,
            "availableRoadLinks": [
              0,
              2,
              3,
              6,
              7,
              10
            ]
          },
          {
            "time": 30,
            "availableRoadLinks": [
              2,
              3,
              4,
              6,
              10,
              11
            ]
          },
          {
            "time": 30,
            "availableRoadLinks": [
              1,
              2,
              3,
              6,
              8,
              10
            ]
          },
          {
            "time": 30,
            "availableRoadLinks": [
              2,
              3,
              5,
              6,
              9,
              10
            ]
          },
          {
            "time": 30,
            "availableRoadLinks": [
              0,
              1,
              2,
              3,
              6,
              10
            ]
          },
          {
            "time": 30,
            "availableRoadLinks": [
              2,
              3,
              6,
              7,
              8,
              10
            ]
          },
          {
            "time": 30,
            "availableRoadLinks": [
              2,
              3,
              4,
              5,
              6,
              10
            ]
          },
          {
            "time": 30,
            "availableRoadLinks": [
              2,
              3,
              6,
              9,
              10,
              11
            ]
          }
        ]
      },
      "virtual": false
    },
    {
      "id": "intersection_1_6",
      "point": {
        "x": 0,
        "y": 1500
      },
      "width": 11,
      "roads": [
        "road_0_6_0",
        "road_1_5_1",
        "road_2_6_2",
        "road_1_7_3",
        "road_1_6_0",
        "road_1_6_1",
        "road_1_6_2",
        "road_1_6_3"
      ],
      "roadLinks": [
        {
          "type": "go_straight",
          "startRoad": "road_0_6_0",
          "endRoad": "road_1_6_0",
          "direction": 0,
          "laneLinks": [
            {
              "startLaneIndex": 1,
              "endLaneIndex": 0,
              "points": [
                {
                  "x": -11.0,
                  "y": 1495.5
                },
                {
                  "x": -9.592,
                  "y": 1495.584
                },
                {
                  "x": -7.656,
                  "y": 1495.812
                },
                {
                  "x": -5.324,
                  "y": 1496.148
                },
                {
                  "x": -2.7279999999999998,
                  "y": 1496.556
                },
                {
                  "x": 0.0,
                  "y": 1497.0
                },
                {
                  "x": 2.7279999999999998,
                  "y": 1497.444
                },
                {
                  "x": 5.323999999999999,
                  "y": 1497.852
                },
                {
                  "x": 7.655999999999999,
                  "y": 1498.188
                },
                {
                  "x": 9.592,
                  "y": 1498.416
                },
                {
                  "x": 11.0,
                  "y": 1498.5
                }
              ]
            },
            {
              "startLaneIndex": 1,
              "endLaneIndex": 1,
              "points": [
                {
                  "x": -11.0,
                  "y": 1495.5
                },
                {
                  "x": -9.592,
                  "y": 1495.5
                },
                {
                  "x": -7.656,
                  "y": 1495.5
                },
                {
                  "x": -5.324,
                  "y": 1495.5
                },
                {
                  "x": -2.7279999999999998,
                  "y": 1495.5
                },
                {
                  "x": 0.0,
                  "y": 1495.5
                },
                {
                  "x": 2.7279999999999998,
                  "y": 1495.5
                },
                {
                  "x": 5.323999999999999,
                  "y": 1495.5
                },
                {
                  "x": 7.655999999999999,
                  "y": 1495.5
                },
                {
                  "x": 9.592,
                  "y": 1495.5
                },
                {
                  "x": 11.0,
                  "y": 1495.5
                }
              ]
            },
            {
              "startLaneIndex": 1,
              "endLaneIndex": 2,
              "points": [
                {
                  "x": -11.0,
                  "y": 1495.5
                },
                {
                  "x": -9.592,
                  "y": 1495.416
                },
                {
                  "x": -7.656,
                  "y": 1495.188
                },
                {
                  "x": -5.324,
                  "y": 1494.852
                },
                {
                  "x": -2.7279999999999998,
                  "y": 1494.444
                },
                {
                  "x": 0.0,
                  "y": 1494.0
                },
                {
                  "x": 2.7279999999999998,
                  "y": 1493.556
                },
                {
                  "x": 5.323999999999999,
                  "y": 1493.148
                },
                {
                  "x": 7.655999999999999,
                  "y": 1492.812
                },
                {
                  "x": 9.592,
                  "y": 1492.584
                },
                {
                  "x": 11.0,
                  "y": 1492.5
                }
              ]
            }
          ]
        },
        {
          "type": "turn_left",
          "startRoad": "road_0_6_0",
          "endRoad": "road_1_6_1",
          "direction": 0,
          "laneLinks": [
            {
              "startLaneIndex": 0,
              "endLaneIndex": 0,
              "points": [
                {
                  "x": -11.0,
                  "y": 1498.5
                },
                {
                  "x": -9.759,
                  "y": 1498.751
                },
                {
                  "x": -8.292,
                  "y": 1499.448
                },
                {
                  "x": -6.683,
                  "y": 1500.507
                },
                {
                  "x": -5.016,
                  "y": 1501.844
                },
                {
                  "x": -3.375,
                  "y": 1503.375
                },
                {
                  "x": -1.844,
                  "y": 1505.016
                },
                {
                  "x": -0.507000000000001,
                  "y": 1506.683
                },
                {
                  "x": 0.551999999999999,
                  "y": 1508.292
                },
                {
                  "x": 1.249,
                  "y": 1509.759
                },
                {
                  "x": 1.5,
                  "y": 1511.0
                }
              ]
            },
            {
              "startLaneIndex": 0,
              "endLaneIndex": 1,
              "points": [
                {
                  "x": -11.0,
                  "y": 1498.5
                },
                {
                  "x": -9.675,
                  "y": 1498.751
                },
                {
                  "x": -7.98,
                  "y": 1499.448
                },
                {
                  "x": -6.035,
                  "y": 1500.507
                },
                {
                  "x": -3.96,
                  "y": 1501.844
                },
                {
                  "x": -1.875,
                  "y": 1503.375
                },
                {
                  "x": 0.1,
                  "y": 1505.016
                },
                {
                  "x": 1.844999999999999,
                  "y": 1506.683
                },
                {
                  "x": 3.239999999999999,
                  "y": 1508.292
                },
                {
                  "x": 4.165,
                  "y": 1509.759
                },
                {
                  "x": 4.5,
                  "y": 1511.0
                }
              ]
            },
            {
              "startLaneIndex": 0,
              "endLaneIndex": 2,
              "points": [
                {
                  "x": -11.0,
                  "y": 1498.5
                },
                {
                  "x": -9.591,
                  "y": 1498.751
                },
                {
                  "x": -7.668,
                  "y": 1499.448
                },
                {
                  "x": -5.387,
                  "y": 1500.507
                },
                {
                  "x": -2.904,
                  "y": 1501.844
                },
                {
                  "x": -0.375,
                  "y": 1503.375
                },
                {
                  "x": 2.044,
                  "y": 1505.016
                },
                {
                  "x": 4.196999999999999,
                  "y": 1506.683
                },
                {
                  "x": 5.927999999999999,
                  "y": 1508.292
                },
                {
                  "x": 7.081,
                  "y": 1509.759
                },
                {
                  "x": 7.5,
                  "y": 1511.0
                }
              ]
            }
          ]
        },
        {
          "type": "turn_right",
          "startRoad": "road_0_6_0",
          "endRoad": "road_1_6_3",
          "direction": 0,
          "laneLinks": [
            {
              "startLaneIndex": 2,
              "endLaneIndex": 0,
              "points": [
                {
                  "x": -11.0,
                  "y": 1492.5
                },
                {
                  "x": -9.843,
                  "y": 1492.501
                },
                {
                  "x": -8.604,
                  "y": 1492.488
                },
                {
                  "x": -7.3309999999999995,
                  "y": 1492.437
                },
                {
                  "x": -6.072,
                  "y": 1492.324
                },
                {
                  "x": -4.875,
                  "y": 1492.125
                },
                {
                  "x": -3.788,
                  "y": 1491.816
                },
                {
                  "x": -2.859000000000001,
                  "y": 1491.373
                },
                {
                  "x": -2.136000000000001,
                  "y": 1490.772
                },
                {
                  "x": -1.6669999999999998,
                  "y": 1489.989
                },
                {
                  "x": -1.5,
                  "y": 1489.0
                }
              ]
            },
            {
              "startLaneIndex": 2,
              "endLaneIndex": 1,
              "points": [
                {
                  "x": -11.0,
                  "y": 1492.5
                },
                {
                  "x": -9.927,
                  "y": 1492.501
                },
                {
                  "x": -8.916,
                  "y": 1492.488
                },
                {
                  "x": -7.979,
                  "y": 1492.437
                },
                {
                  "x": -7.128,
                  "y": 1492.324
                },
                {
                  "x": -6.375,
                  "y": 1492.125
                },
                {
                  "x": -5.732,
                  "y": 1491.816
                },
                {
                  "x": -5.211000000000001,
                  "y": 1491.373
                },
                {
                  "x": -4.824000000000001,
                  "y": 1490.772
                },
                {
                  "x": -4.583,
                  "y": 1489.989
                },
                {
                  "x": -4.5,
                  "y": 1489.0
                }
              ]
            },
            {
              "startLaneIndex": 2,
              "endLaneIndex": 2,
              "points": [
                {
                  "x": -11.0,
                  "y": 1492.5
                },
                {
                  "x": -10.011,
                  "y": 1492.501
                },
                {
                  "x": -9.228,
                  "y": 1492.488
                },
                {
                  "x": -8.627,
                  "y": 1492.437
                },
                {
                  "x": -8.184,
                  "y": 1492.324
                },
                {
                  "x": -7.875,
                  "y": 1492.125
                },
                {
                  "x": -7.676,
                  "y": 1491.816
                },
                {
                  "x": -7.563000000000001,
                  "y": 1491.373
                },
                {
                  "x": -7.512000000000001,
                  "y": 1490.772
                },
                {
                  "x": -7.499,
                  "y": 1489.989
                },
                {
                  "x": -7.5,
                  "y": 1489.0
                }
              ]
            }
          ]
        },
        {
          "type": "turn_right",
          "startRoad": "road_1_5_1",
          "endRoad": "road_1_6_0",
          "direction": 1,
          "laneLinks": [
            {
              "startLaneIndex": 2,
              "endLaneIndex": 0,
              "points": [
                {
                  "x": 7.5,
                  "y": 1489.0
                },
                {
                  "x": 7.499,
                  "y": 1490.157
                },
                {
                  "x": 7.512,
                  "y": 1491.396
                },
                {
                  "x": 7.563,
                  "y": 1492.669
                },
                {
                  "x": 7.676,
                  "y": 1493.9279999999999
                },
                {
                  "x": 7.875,
                  "y": 1495.125
                },
                {
                  "x": 8.184,
                  "y": 1496.212
                },
                {
                  "x": 8.627,
                  "y": 1497.141
                },
                {
                  "x": 9.228,
                  "y": 1497.864
                },
                {
                  "x": 10.011,
                  "y": 1498.333
                },
                {
                  "x": 11.0,
                  "y": 1498.5
                }
              ]
            },
            {
              "startLaneIndex": 2,
              "endLaneIndex": 1,
              "points": [
                {
                  "x": 7.5,
                  "y": 1489.0
                },
                {
                  "x": 7.499,
                  "y": 1490.073
                },
                {
                  "x": 7.512,
                  "y": 1491.084
                },
                {
                  "x": 7.563,
                  "y": 1492.021
                },
                {
                  "x": 7.676,
                  "y": 1492.872
                },
                {
                  "x": 7.875,
                  "y": 1493.625
                },
                {
                  "x": 8.184,
                  "y": 1494.268
                },
                {
                  "x": 8.627,
                  "y": 1494.789
                },
                {
                  "x": 9.228,
                  "y": 1495.176
                },
                {
                  "x": 10.011,
                  "y": 1495.417
                },
                {
                  "x": 11.0,
                  "y": 1495.5
                }
              ]
            },
            {
              "startLaneIndex": 2,
              "endLaneIndex": 2,
              "points": [
                {
                  "x": 7.5,
                  "y": 1489.0
                },
                {
                  "x": 7.499,
                  "y": 1489.989
                },
                {
                  "x": 7.512,
                  "y": 1490.772
                },
                {
                  "x": 7.563,
                  "y": 1491.373
                },
                {
                  "x": 7.676,
                  "y": 1491.816
                },
                {
                  "x": 7.875,
                  "y": 1492.125
                },
                {
                  "x": 8.184,
                  "y": 1492.324
                },
                {
                  "x": 8.627,
                  "y": 1492.437
                },
                {
                  "x": 9.228,
                  "y": 1492.488
                },
                {
                  "x": 10.011,
                  "y": 1492.501
                },
                {
                  "x": 11.0,
                  "y": 1492.5
                }
              ]
            }
          ]
        },
        {
          "type": "go_straight",
          "startRoad": "road_1_5_1",
          "endRoad": "road_1_6_1",
          "direction": 1,
          "laneLinks": [
            {
              "startLaneIndex": 1,
              "endLaneIndex": 0,
              "points": [
                {
                  "x": 4.5,
                  "y": 1489.0
                },
                {
                  "x": 4.416,
                  "y": 1490.408
                },
                {
                  "x": 4.188,
                  "y": 1492.344
                },
                {
                  "x": 3.852,
                  "y": 1494.676
                },
                {
                  "x": 3.444,
                  "y": 1497.272
                },
                {
                  "x": 3.0,
                  "y": 1500.0
                },
                {
                  "x": 2.556,
                  "y": 1502.728
                },
                {
                  "x": 2.148,
                  "y": 1505.324
                },
                {
                  "x": 1.811999999999999,
                  "y": 1507.656
                },
                {
                  "x": 1.584,
                  "y": 1509.592
                },
                {
                  "x": 1.5,
                  "y": 1511.0
                }
              ]
            },
            {
              "startLaneIndex": 1,
              "endLaneIndex": 1,
              "points": [
                {
                  "x": 4.5,
                  "y": 1489.0
                },
                {
                  "x": 4.5,
                  "y": 1490.408
                },
                {
                  "x": 4.5,
                  "y": 1492.344
                },
                {
                  "x": 4.5,
                  "y": 1494.676
                },
                {
                  "x": 4.5,
                  "y": 1497.272
                },
                {
                  "x": 4.5,
                  "y": 1500.0
                },
                {
                  "x": 4.5,
                  "y": 1502.728
                },
                {
                  "x": 4.5,
                  "y": 1505.324
                },
                {
                  "x": 4.499999999999999,
                  "y": 1507.656
                },
                {
                  "x": 4.5,
                  "y": 1509.592
                },
                {
                  "x": 4.5,
                  "y": 1511.0
                }
              ]
            },
            {
              "startLaneIndex": 1,
              "endLaneIndex": 2,
              "points": [
                {
                  "x": 4.5,
                  "y": 1489.0
                },
                {
                  "x": 4.584,
                  "y": 1490.408
                },
                {
                  "x": 4.812,
                  "y": 1492.344
                },
                {
                  "x": 5.148,
                  "y": 1494.676
                },
                {
                  "x": 5.556,
                  "y": 1497.272
                },
                {
                  "x": 6.0,
                  "y": 1500.0
                },
                {
                  "x": 6.444,
                  "y": 1502.728
                },
                {
                  "x": 6.852,
                  "y": 1505.324
                },
                {
                  "x": 7.187999999999999,
                  "y": 1507.656
                },
                {
                  "x": 7.416,
                  "y": 1509.592
                },
                {
                  "x": 7.5,
                  "y": 1511.0
                }
              ]
            }
          ]
        },
        {
          "type": "turn_left",
          "startRoad": "road_1_5_1",
          "endRoad": "road_1_6_2",
          "direction": 1,
          "laneLinks": [
            {
              "startLaneIndex": 0,
              "endLaneIndex": 0,
              "points": [
                {
                  "x": 1.5,
                  "y": 1489.0
                },
                {
                  "x": 1.249,
                  "y": 1490.241
                },
                {
                  "x": 0.552,
                  "y": 1491.708
                },
                {
                  "x": -0.507,
                  "y": 1493.317
                },
                {
                  "x": -1.844,
                  "y": 1494.984
                },
                {
                  "x": -3.375,
                  "y": 1496.625
                },
                {
                  "x": -5.016,
                  "y": 1498.156
                },
                {
                  "x": -6.683,
                  "y": 1499.493
                },
                {
                  "x": -8.292,
                  "y": 1500.552
                },
                {
                  "x": -9.759,
                  "y": 1501.249
                },
                {
                  "x": -11.0,
                  "y": 1501.5
                }
              ]
            },
            {
              "startLaneIndex": 0,
              "endLaneIndex": 1,
              "points": [
                {
                  "x": 1.5,
                  "y": 1489.0
                },
                {
                  "x": 1.249,
                  "y": 1490.325
                },
                {
                  "x": 0.552,
                  "y": 1492.02
                },
                {
                  "x": -0.507,
                  "y": 1493.965
                },
                {
                  "x": -1.844,
                  "y": 1496.04
                },
                {
                  "x": -3.375,
                  "y": 1498.125
                },
                {
                  "x": -5.016,
                  "y": 1500.1
                },
                {
                  "x": -6.683,
                  "y": 1501.845
                },
                {
                  "x": -8.292,
                  "y": 1503.24
                },
                {
                  "x": -9.759,
                  "y": 1504.165
                },
                {
                  "x": -11.0,
                  "y": 1504.5
                }
              ]
            },
            {
              "startLaneIndex": 0,
              "endLaneIndex": 2,
              "points": [
                {
                  "x": 1.5,
                  "y": 1489.0
                },
                {
                  "x": 1.249,
                  "y": 1490.409
                },
                {
                  "x": 0.552,
                  "y": 1492.3319999999999
                },
                {
                  "x": -0.507,
                  "y": 1494.613
                },
                {
                  "x": -1.844,
                  "y": 1497.096
                },
                {
                  "x": -3.375,
                  "y": 1499.625
                },
                {
                  "x": -5.016,
                  "y": 1502.044
                },
                {
                  "x": -6.683,
                  "y": 1504.197
                },
                {
                  "x": -8.292,
                  "y": 1505.9279999999999
                },
                {
                  "x": -9.759,
                  "y": 1507.081
                },
                {
                  "x": -11.0,
                  "y": 1507.5
                }
              ]
            }
          ]
        },
        {
          "type": "turn_right",
          "startRoad": "road_2_6_2",
          "endRoad": "road_1_6_1",
          "direction": 2,
          "laneLinks": [
            {
              "startLaneIndex": 2,
              "endLaneIndex": 0,
              "points": [
                {
                  "x": 11.0,
                  "y": 1507.5
                },
                {
                  "x": 9.843,
                  "y": 1507.499
                },
                {
                  "x": 8.604,
                  "y": 1507.512
                },
                {
                  "x": 7.3309999999999995,
                  "y": 1507.563
                },
                {
                  "x": 6.072,
                  "y": 1507.676
                },
                {
                  "x": 4.875,
                  "y": 1507.875
                },
                {
                  "x": 3.788,
                  "y": 1508.184
                },
                {
                  "x": 2.859000000000001,
                  "y": 1508.627
                },
                {
                  "x": 2.136000000000001,
                  "y": 1509.228
                },
                {
                  "x": 1.6669999999999998,
                  "y": 1510.011
                },
                {
                  "x": 1.5,
                  "y": 1511.0
                }
              ]
            },
            {
              "startLaneIndex": 2,
              "endLaneIndex": 1,
              "points": [
                {
                  "x": 11.0,
                  "y": 1507.5
                },
                {
                  "x": 9.927,
                  "y": 1507.499
                },
                {
                  "x": 8.916,
                  "y": 1507.512
                },
                {
                  "x": 7.979,
                  "y": 1507.563
                },
                {
                  "x": 7.128,
                  "y": 1507.676
                },
                {
                  "x": 6.375,
                  "y": 1507.875
                },
                {
                  "x": 5.732,
                  "y": 1508.184
                },
                {
                  "x": 5.211000000000001,
                  "y": 1508.627
                },
                {
                  "x": 4.824000000000001,
                  "y": 1509.228
                },
                {
                  "x": 4.583,
                  "y": 1510.011
                },
                {
                  "x": 4.5,
                  "y": 1511.0
                }
              ]
            },
            {
              "startLaneIndex": 2,
              "endLaneIndex": 2,
              "points": [
                {
                  "x": 11.0,
                  "y": 1507.5
                },
                {
                  "x": 10.011,
                  "y": 1507.499
                },
                {
                  "x": 9.228,
                  "y": 1507.512
                },
                {
                  "x": 8.627,
                  "y": 1507.563
                },
                {
                  "x": 8.184,
                  "y": 1507.676
                },
                {
                  "x": 7.875,
                  "y": 1507.875
                },
                {
                  "x": 7.676,
                  "y": 1508.184
                },
                {
                  "x": 7.563000000000001,
                  "y": 1508.627
                },
                {
                  "x": 7.512000000000001,
                  "y": 1509.228
                },
                {
                  "x": 7.499,
                  "y": 1510.011
                },
                {
                  "x": 7.5,
                  "y": 1511.0
                }
              ]
            }
          ]
        },
        {
          "type": "go_straight",
          "startRoad": "road_2_6_2",
          "endRoad": "road_1_6_2",
          "direction": 2,
          "laneLinks": [
            {
              "startLaneIndex": 1,
              "endLaneIndex": 0,
              "points": [
                {
                  "x": 11.0,
                  "y": 1504.5
                },
                {
                  "x": 9.592,
                  "y": 1504.416
                },
                {
                  "x": 7.656,
                  "y": 1504.188
                },
                {
                  "x": 5.324,
                  "y": 1503.852
                },
                {
                  "x": 2.7279999999999998,
                  "y": 1503.444
                },
                {
                  "x": 0.0,
                  "y": 1503.0
                },
                {
                  "x": -2.7279999999999998,
                  "y": 1502.556
                },
                {
                  "x": -5.323999999999999,
                  "y": 1502.148
                },
                {
                  "x": -7.655999999999999,
                  "y": 1501.812
                },
                {
                  "x": -9.592,
                  "y": 1501.584
                },
                {
                  "x": -11.0,
                  "y": 1501.5
                }
              ]
            },
            {
              "startLaneIndex": 1,
              "endLaneIndex": 1,
              "points": [
                {
                  "x": 11.0,
                  "y": 1504.5
                },
                {
                  "x": 9.592,
                  "y": 1504.5
                },
                {
                  "x": 7.656,
                  "y": 1504.5
                },
                {
                  "x": 5.324,
                  "y": 1504.5
                },
                {
                  "x": 2.7279999999999998,
                  "y": 1504.5
                },
                {
                  "x": 0.0,
                  "y": 1504.5
                },
                {
                  "x": -2.7279999999999998,
                  "y": 1504.5
                },
                {
                  "x": -5.323999999999999,
                  "y": 1504.5
                },
                {
                  "x": -7.655999999999999,
                  "y": 1504.5
                },
                {
                  "x": -9.592,
                  "y": 1504.5
                },
                {
                  "x": -11.0,
                  "y": 1504.5
                }
              ]
            },
            {
              "startLaneIndex": 1,
              "endLaneIndex": 2,
              "points": [
                {
                  "x": 11.0,
                  "y": 1504.5
                },
                {
                  "x": 9.592,
                  "y": 1504.584
                },
                {
                  "x": 7.656,
                  "y": 1504.812
                },
                {
                  "x": 5.324,
                  "y": 1505.148
                },
                {
                  "x": 2.7279999999999998,
                  "y": 1505.556
                },
                {
                  "x": 0.0,
                  "y": 1506.0
                },
                {
                  "x": -2.7279999999999998,
                  "y": 1506.444
                },
                {
                  "x": -5.323999999999999,
                  "y": 1506.852
                },
                {
                  "x": -7.655999999999999,
                  "y": 1507.188
                },
                {
                  "x": -9.592,
                  "y": 1507.416
                },
                {
                  "x": -11.0,
                  "y": 1507.5
                }
              ]
            }
          ]
        },
        {
          "type": "turn_left",
          "startRoad": "road_2_6_2",
          "endRoad": "road_1_6_3",
          "direction": 2,
          "laneLinks": [
            {
              "startLaneIndex": 0,
              "endLaneIndex": 0,
              "points": [
                {
                  "x": 11.0,
                  "y": 1501.5
                },
                {
                  "x": 9.759,
                  "y": 1501.249
                },
                {
                  "x": 8.292,
                  "y": 1500.552
                },
                {
                  "x": 6.683,
                  "y": 1499.493
                },
                {
                  "x": 5.016,
                  "y": 1498.156
                },
                {
                  "x": 3.375,
                  "y": 1496.625
                },
                {
                  "x": 1.844,
                  "y": 1494.984
                },
                {
                  "x": 0.507000000000001,
                  "y": 1493.317
                },
                {
                  "x": -0.551999999999999,
                  "y": 1491.708
                },
                {
                  "x": -1.249,
                  "y": 1490.241
                },
                {
                  "x": -1.5,
                  "y": 1489.0
                }
              ]
            },
            {
              "startLaneIndex": 0,
              "endLaneIndex": 1,
              "points": [
                {
                  "x": 11.0,
                  "y": 1501.5
                },
                {
                  "x": 9.675,
                  "y": 1501.249
                },
                {
                  "x": 7.98,
                  "y": 1500.552
                },
                {
                  "x": 6.035,
                  "y": 1499.493
                },
                {
                  "x": 3.96,
                  "y": 1498.156
                },
                {
                  "x": 1.875,
                  "y": 1496.625
                },
                {
                  "x": -0.1,
                  "y": 1494.984
                },
                {
                  "x": -1.844999999999999,
                  "y": 1493.317
                },
                {
                  "x": -3.239999999999999,
                  "y": 1491.708
                },
                {
                  "x": -4.165,
                  "y": 1490.241
                },
                {
                  "x": -4.5,
                  "y": 1489.0
                }
              ]
            },
            {
              "startLaneIndex": 0,
              "endLaneIndex": 2,
              "points": [
                {
                  "x": 11.0,
                  "y": 1501.5
                },
                {
                  "x": 9.591,
                  "y": 1501.249
                },
                {
                  "x": 7.668,
                  "y": 1500.552
                },
                {
                  "x": 5.387,
                  "y": 1499.493
                },
                {
                  "x": 2.904,
                  "y": 1498.156
                },
                {
                  "x": 0.375,
                  "y": 1496.625
                },
                {
                  "x": -2.044,
                  "y": 1494.984
                },
                {
                  "x": -4.196999999999999,
                  "y": 1493.317
                },
                {
                  "x": -5.927999999999999,
                  "y": 1491.708
                },
                {
                  "x": -7.081,
                  "y": 1490.241
                },
                {
                  "x": -7.5,
                  "y": 1489.0
                }
              ]
            }
          ]
        },
        {
          "type": "turn_left",
          "startRoad": "road_1_7_3",
          "endRoad": "road_1_6_0",
          "direction": 3,
          "laneLinks": [
            {
              "startLaneIndex": 0,
              "endLaneIndex": 0,
              "points": [
                {
                  "x": -1.5,
                  "y": 1511.0
                },
                {
                  "x": -1.249,
                  "y": 1509.759
                },
                {
                  "x": -0.552,
                  "y": 1508.292
                },
                {
                  "x": 0.507,
                  "y": 1506.683
                },
                {
                  "x": 1.844,
                  "y": 1505.016
                },
                {
                  "x": 3.375,
                  "y": 1503.375
                },
                {
                  "x": 5.016,
                  "y": 1501.844
                },
                {
                  "x": 6.683,
                  "y": 1500.507
                },
                {
                  "x": 8.292,
                  "y": 1499.448
                },
                {
                  "x": 9.759,
                  "y": 1498.751
                },
                {
                  "x": 11.0,
                  "y": 1498.5
                }
              ]
            },
            {
              "startLaneIndex": 0,
              "endLaneIndex": 1,
              "points": [
                {
                  "x": -1.5,
                  "y": 1511.0
                },
                {
                  "x": -1.249,
                  "y": 1509.675
                },
                {
                  "x": -0.552,
                  "y": 1507.98
                },
                {
                  "x": 0.507,
                  "y": 1506.035
                },
                {
                  "x": 1.844,
                  "y": 1503.96
                },
                {
                  "x": 3.375,
                  "y": 1501.875
                },
                {
                  "x": 5.016,
                  "y": 1499.9
                },
                {
                  "x": 6.683,
                  "y": 1498.155
                },
                {
                  "x": 8.292,
                  "y": 1496.76
                },
                {
                  "x": 9.759,
                  "y": 1495.835
                },
                {
                  "x": 11.0,
                  "y": 1495.5
                }
              ]
            },
            {
              "startLaneIndex": 0,
              "endLaneIndex": 2,
              "points": [
                {
                  "x": -1.5,
                  "y": 1511.0
                },
                {
                  "x": -1.249,
                  "y": 1509.591
                },
                {
                  "x": -0.552,
                  "y": 1507.668
                },
                {
                  "x": 0.507,
                  "y": 1505.387
                },
                {
                  "x": 1.844,
                  "y": 1502.904
                },
                {
                  "x": 3.375,
                  "y": 1500.375
                },
                {
                  "x": 5.016,
                  "y": 1497.956
                },
                {
                  "x": 6.683,
                  "y": 1495.8029999999999
                },
                {
                  "x": 8.292,
                  "y": 1494.072
                },
                {
                  "x": 9.759,
                  "y": 1492.919
                },
                {
                  "x": 11.0,
                  "y": 1492.5
                }
              ]
            }
          ]
        },
        {
          "type": "turn_right",
          "startRoad": "road_1_7_3",
          "endRoad": "road_1_6_2",
          "direction": 3,
          "laneLinks": [
            {
              "startLaneIndex": 2,
              "endLaneIndex": 0,
              "points": [
                {
                  "x": -7.5,
                  "y": 1511.0
                },
                {
                  "x": -7.499,
                  "y": 1509.843
                },
                {
                  "x": -7.512,
                  "y": 1508.604
                },
                {
                  "x": -7.563,
                  "y": 1507.331
                },
                {
                  "x": -7.676,
                  "y": 1506.072
                },
                {
                  "x": -7.875,
                  "y": 1504.875
                },
                {
                  "x": -8.184,
                  "y": 1503.788
                },
                {
                  "x": -8.627,
                  "y": 1502.859
                },
                {
                  "x": -9.228,
                  "y": 1502.136
                },
                {
                  "x": -10.011,
                  "y": 1501.667
                },
                {
                  "x": -11.0,
                  "y": 1501.5
                }
              ]
            },
            {
              "startLaneIndex": 2,
              "endLaneIndex": 1,
              "points": [
                {
                  "x": -7.5,
                  "y": 1511.0
                },
                {
                  "x": -7.499,
                  "y": 1509.927
                },
                {
                  "x": -7.512,
                  "y": 1508.916
                },
                {
                  "x": -7.563,
                  "y": 1507.979
                },
                {
                  "x": -7.676,
                  "y": 1507.128
                },
                {
                  "x": -7.875,
                  "y": 1506.375
                },
                {
                  "x": -8.184,
                  "y": 1505.732
                },
                {
                  "x": -8.627,
                  "y": 1505.211
                },
                {
                  "x": -9.228,
                  "y": 1504.824
                },
                {
                  "x": -10.011,
                  "y": 1504.583
                },
                {
                  "x": -11.0,
                  "y": 1504.5
                }
              ]
            },
            {
              "startLaneIndex": 2,
              "endLaneIndex": 2,
              "points": [
                {
                  "x": -7.5,
                  "y": 1511.0
                },
                {
                  "x": -7.499,
                  "y": 1510.011
                },
                {
                  "x": -7.512,
                  "y": 1509.228
                },
                {
                  "x": -7.563,
                  "y": 1508.627
                },
                {
                  "x": -7.676,
                  "y": 1508.184
                },
                {
                  "x": -7.875,
                  "y": 1507.875
                },
                {
                  "x": -8.184,
                  "y": 1507.676
                },
                {
                  "x": -8.627,
                  "y": 1507.563
                },
                {
                  "x": -9.228,
                  "y": 1507.512
                },
                {
                  "x": -10.011,
                  "y": 1507.499
                },
                {
                  "x": -11.0,
                  "y": 1507.5
                }
              ]
            }
          ]
        },
        {
          "type": "go_straight",
          "startRoad": "road_1_7_3",
          "endRoad": "road_1_6_3",
          "direction": 3,
          "laneLinks": [
            {
              "startLaneIndex": 1,
              "endLaneIndex": 0,
              "points": [
                {
                  "x": -4.5,
                  "y": 1511.0
                },
                {
                  "x": -4.416,
                  "y": 1509.592
                },
                {
                  "x": -4.188,
                  "y": 1507.656
                },
                {
                  "x": -3.852,
                  "y": 1505.324
                },
                {
                  "x": -3.444,
                  "y": 1502.728
                },
                {
                  "x": -3.0,
                  "y": 1500.0
                },
                {
                  "x": -2.556,
                  "y": 1497.272
                },
                {
                  "x": -2.148,
                  "y": 1494.676
                },
                {
                  "x": -1.811999999999999,
                  "y": 1492.344
                },
                {
                  "x": -1.584,
                  "y": 1490.408
                },
                {
                  "x": -1.5,
                  "y": 1489.0
                }
              ]
            },
            {
              "startLaneIndex": 1,
              "endLaneIndex": 1,
              "points": [
                {
                  "x": -4.5,
                  "y": 1511.0
                },
                {
                  "x": -4.5,
                  "y": 1509.592
                },
                {
                  "x": -4.5,
                  "y": 1507.656
                },
                {
                  "x": -4.5,
                  "y": 1505.324
                },
                {
                  "x": -4.5,
                  "y": 1502.728
                },
                {
                  "x": -4.5,
                  "y": 1500.0
                },
                {
                  "x": -4.5,
                  "y": 1497.272
                },
                {
                  "x": -4.5,
                  "y": 1494.676
                },
                {
                  "x": -4.499999999999999,
                  "y": 1492.344
                },
                {
                  "x": -4.5,
                  "y": 1490.408
                },
                {
                  "x": -4.5,
                  "y": 1489.0
                }
              ]
            },
            {
              "startLaneIndex": 1,
              "endLaneIndex": 2,
              "points": [
                {
                  "x": -4.5,
                  "y": 1511.0
                },
                {
                  "x": -4.584,
                  "y": 1509.592
                },
                {
                  "x": -4.812,
                  "y": 1507.656
                },
                {
                  "x": -5.148,
                  "y": 1505.324
                },
                {
                  "x": -5.556,
                  "y": 1502.728
                },
                {
                  "x": -6.0,
                  "y": 1500.0
                },
                {
                  "x": -6.444,
                  "y": 1497.272
                },
                {
                  "x": -6.852,
                  "y": 1494.676
                },
                {
                  "x": -7.187999999999999,
                  "y": 1492.344
                },
                {
                  "x": -7.416,
                  "y": 1490.408
                },
                {
                  "x": -7.5,
                  "y": 1489.0
                }
              ]
            }
          ]
        }
      ],
      "trafficLight": {
        "roadLinkIndices": [
          0,
          1,
          2,
          3,
          4,
          5,
          6,
          7,
          8,
          9,
          10,
          11
        ],
        "lightphases": [
          {
            "time": 5,
            "availableRoadLinks": [
              10,
              2,
              3,
              6
            ]
          },
          {
            "time": 30,
            "availableRoadLinks": [
              0,
              2,
              3,
              6,
              7,
              10
            ]
          },
          {
            "time": 30,
            "availableRoadLinks": [
              2,
              3,
              4,
              6,
              10,
              11
            ]
          },
          {
            "time": 30,
            "availableRoadLinks": [
              1,
              2,
              3,
              6,
              8,
              10
            ]
          },
          {
            "time": 30,
            "availableRoadLinks": [
              2,
              3,
              5,
              6,
              9,
              10
            ]
          },
          {
            "time": 30,
            "availableRoadLinks": [
              0,
              1,
              2,
              3,
              6,
              10
            ]
          },
          {
            "time": 30,
            "availableRoadLinks": [
              2,
              3,
              6,
              7,
              8,
              10
            ]
          },
          {
            "time": 30,
            "availableRoadLinks": [
              2,
              3,
              4,
              5,
              6,
              10
            ]
          },
          {
            "time": 30,
            "availableRoadLinks": [
              2,
              3,
              6,
              9,
              10,
              11
            ]
          }
        ]
      },
      "virtual": false
    },
    {
      "id": "intersection_1_7",
      "point": {
        "x": 0,
        "y": 1800
      },
      "width": 11,
      "roads": [
        "road_0_7_0",
        "road_1_6_1",
        "road_2_7_2",
        "road_1_8_3",
        "road_1_7_0",
        "road_1_7_1",
        "road_1_7_2",
        "road_1_7_3"
      ],
      "roadLinks": [
        {
          "type": "go_straight",
          "startRoad": "road_0_7_0",
          "endRoad": "road_1_7_0",
          "direction": 0,
          "laneLinks": [
            {
              "startLaneIndex": 1,
              "endLaneIndex": 0,
              "points": [
                {
                  "x": -11.0,
                  "y": 1795.5
                },
                {
                  "x": -9.592,
                  "y": 1795.584
                },
                {
                  "x": -7.656,
                  "y": 1795.812
                },
                {
                  "x": -5.324,
                  "y": 1796.148
                },
                {
                  "x": -2.7279999999999998,
                  "y": 1796.556
                },
                {
                  "x": 0.0,
                  "y": 1797.0
                },
                {
                  "x": 2.7279999999999998,
                  "y": 1797.444
                },
                {
                  "x": 5.323999999999999,
                  "y": 1797.852
                },
                {
                  "x": 7.655999999999999,
                  "y": 1798.188
                },
                {
                  "x": 9.592,
                  "y": 1798.416
                },
                {
                  "x": 11.0,
                  "y": 1798.5
                }
              ]
            },
            {
              "startLaneIndex": 1,
              "endLaneIndex": 1,
              "points": [
                {
                  "x": -11.0,
                  "y": 1795.5
                },
                {
                  "x": -9.592,
                  "y": 1795.5
                },
                {
                  "x": -7.656,
                  "y": 1795.5
                },
                {
                  "x": -5.324,
                  "y": 1795.5
                },
                {
                  "x": -2.7279999999999998,
                  "y": 1795.5
                },
                {
                  "x": 0.0,
                  "y": 1795.5
                },
                {
                  "x": 2.7279999999999998,
                  "y": 1795.5
                },
                {
                  "x": 5.323999999999999,
                  "y": 1795.5
                },
                {
                  "x": 7.655999999999999,
                  "y": 1795.5
                },
                {
                  "x": 9.592,
                  "y": 1795.5
                },
                {
                  "x": 11.0,
                  "y": 1795.5
                }
              ]
            },
            {
              "startLaneIndex": 1,
              "endLaneIndex": 2,
              "points": [
                {
                  "x": -11.0,
                  "y": 1795.5
                },
                {
                  "x": -9.592,
                  "y": 1795.416
                },
                {
                  "x": -7.656,
                  "y": 1795.188
                },
                {
                  "x": -5.324,
                  "y": 1794.852
                },
                {
                  "x": -2.7279999999999998,
                  "y": 1794.444
                },
                {
                  "x": 0.0,
                  "y": 1794.0
                },
                {
                  "x": 2.7279999999999998,
                  "y": 1793.556
                },
                {
                  "x": 5.323999999999999,
                  "y": 1793.148
                },
                {
                  "x": 7.655999999999999,
                  "y": 1792.812
                },
                {
                  "x": 9.592,
                  "y": 1792.584
                },
                {
                  "x": 11.0,
                  "y": 1792.5
                }
              ]
            }
          ]
        },
        {
          "type": "turn_left",
          "startRoad": "road_0_7_0",
          "endRoad": "road_1_7_1",
          "direction": 0,
          "laneLinks": [
            {
              "startLaneIndex": 0,
              "endLaneIndex": 0,
              "points": [
                {
                  "x": -11.0,
                  "y": 1798.5
                },
                {
                  "x": -9.759,
                  "y": 1798.751
                },
                {
                  "x": -8.292,
                  "y": 1799.448
                },
                {
                  "x": -6.683,
                  "y": 1800.507
                },
                {
                  "x": -5.016,
                  "y": 1801.844
                },
                {
                  "x": -3.375,
                  "y": 1803.375
                },
                {
                  "x": -1.844,
                  "y": 1805.016
                },
                {
                  "x": -0.507000000000001,
                  "y": 1806.683
                },
                {
                  "x": 0.551999999999999,
                  "y": 1808.292
                },
                {
                  "x": 1.249,
                  "y": 1809.759
                },
                {
                  "x": 1.5,
                  "y": 1811.0
                }
              ]
            },
            {
              "startLaneIndex": 0,
              "endLaneIndex": 1,
              "points": [
                {
                  "x": -11.0,
                  "y": 1798.5
                },
                {
                  "x": -9.675,
                  "y": 1798.751
                },
                {
                  "x": -7.98,
                  "y": 1799.448
                },
                {
                  "x": -6.035,
                  "y": 1800.507
                },
                {
                  "x": -3.96,
                  "y": 1801.844
                },
                {
                  "x": -1.875,
                  "y": 1803.375
                },
                {
                  "x": 0.1,
                  "y": 1805.016
                },
                {
                  "x": 1.844999999999999,
                  "y": 1806.683
                },
                {
                  "x": 3.239999999999999,
                  "y": 1808.292
                },
                {
                  "x": 4.165,
                  "y": 1809.759
                },
                {
                  "x": 4.5,
                  "y": 1811.0
                }
              ]
            },
            {
              "startLaneIndex": 0,
              "endLaneIndex": 2,
              "points": [
                {
                  "x": -11.0,
                  "y": 1798.5
                },
                {
                  "x": -9.591,
                  "y": 1798.751
                },
                {
                  "x": -7.668,
                  "y": 1799.448
                },
                {
                  "x": -5.387,
                  "y": 1800.507
                },
                {
                  "x": -2.904,
                  "y": 1801.844
                },
                {
                  "x": -0.375,
                  "y": 1803.375
                },
                {
                  "x": 2.044,
                  "y": 1805.016
                },
                {
                  "x": 4.196999999999999,
                  "y": 1806.683
                },
                {
                  "x": 5.927999999999999,
                  "y": 1808.292
                },
                {
                  "x": 7.081,
                  "y": 1809.759
                },
                {
                  "x": 7.5,
                  "y": 1811.0
                }
              ]
            }
          ]
        },
        {
          "type": "turn_right",
          "startRoad": "road_0_7_0",
          "endRoad": "road_1_7_3",
          "direction": 0,
          "laneLinks": [
            {
              "startLaneIndex": 2,
              "endLaneIndex": 0,
              "points": [
                {
                  "x": -11.0,
                  "y": 1792.5
                },
                {
                  "x": -9.843,
                  "y": 1792.501
                },
                {
                  "x": -8.604,
                  "y": 1792.488
                },
                {
                  "x": -7.3309999999999995,
                  "y": 1792.437
                },
                {
                  "x": -6.072,
                  "y": 1792.324
                },
                {
                  "x": -4.875,
                  "y": 1792.125
                },
                {
                  "x": -3.788,
                  "y": 1791.816
                },
                {
                  "x": -2.859000000000001,
                  "y": 1791.373
                },
                {
                  "x": -2.136000000000001,
                  "y": 1790.772
                },
                {
                  "x": -1.6669999999999998,
                  "y": 1789.989
                },
                {
                  "x": -1.5,
                  "y": 1789.0
                }
              ]
            },
            {
              "startLaneIndex": 2,
              "endLaneIndex": 1,
              "points": [
                {
                  "x": -11.0,
                  "y": 1792.5
                },
                {
                  "x": -9.927,
                  "y": 1792.501
                },
                {
                  "x": -8.916,
                  "y": 1792.488
                },
                {
                  "x": -7.979,
                  "y": 1792.437
                },
                {
                  "x": -7.128,
                  "y": 1792.324
                },
                {
                  "x": -6.375,
                  "y": 1792.125
                },
                {
                  "x": -5.732,
                  "y": 1791.816
                },
                {
                  "x": -5.211000000000001,
                  "y": 1791.373
                },
                {
                  "x": -4.824000000000001,
                  "y": 1790.772
                },
                {
                  "x": -4.583,
                  "y": 1789.989
                },
                {
                  "x": -4.5,
                  "y": 1789.0
                }
              ]
            },
            {
              "startLaneIndex": 2,
              "endLaneIndex": 2,
              "points": [
                {
                  "x": -11.0,
                  "y": 1792.5
                },
                {
                  "x": -10.011,
                  "y": 1792.501
                },
                {
                  "x": -9.228,
                  "y": 1792.488
                },
                {
                  "x": -8.627,
                  "y": 1792.437
                },
                {
                  "x": -8.184,
                  "y": 1792.324
                },
                {
                  "x": -7.875,
                  "y": 1792.125
                },
                {
                  "x": -7.676,
                  "y": 1791.816
                },
                {
                  "x": -7.563000000000001,
                  "y": 1791.373
                },
                {
                  "x": -7.512000000000001,
                  "y": 1790.772
                },
                {
                  "x": -7.499,
                  "y": 1789.989
                },
                {
                  "x": -7.5,
                  "y": 1789.0
                }
              ]
            }
          ]
        },
        {
          "type": "turn_right",
          "startRoad": "road_1_6_1",
          "endRoad": "road_1_7_0",
          "direction": 1,
          "laneLinks": [
            {
              "startLaneIndex": 2,
              "endLaneIndex": 0,
              "points": [
                {
                  "x": 7.5,
                  "y": 1789.0
                },
                {
                  "x": 7.499,
                  "y": 1790.157
                },
                {
                  "x": 7.512,
                  "y": 1791.396
                },
                {
                  "x": 7.563,
                  "y": 1792.669
                },
                {
                  "x": 7.676,
                  "y": 1793.9279999999999
                },
                {
                  "x": 7.875,
                  "y": 1795.125
                },
                {
                  "x": 8.184,
                  "y": 1796.212
                },
                {
                  "x": 8.627,
                  "y": 1797.141
                },
                {
                  "x": 9.228,
                  "y": 1797.864
                },
                {
                  "x": 10.011,
                  "y": 1798.333
                },
                {
                  "x": 11.0,
                  "y": 1798.5
                }
              ]
            },
            {
              "startLaneIndex": 2,
              "endLaneIndex": 1,
              "points": [
                {
                  "x": 7.5,
                  "y": 1789.0
                },
                {
                  "x": 7.499,
                  "y": 1790.073
                },
                {
                  "x": 7.512,
                  "y": 1791.084
                },
                {
                  "x": 7.563,
                  "y": 1792.021
                },
                {
                  "x": 7.676,
                  "y": 1792.872
                },
                {
                  "x": 7.875,
                  "y": 1793.625
                },
                {
                  "x": 8.184,
                  "y": 1794.268
                },
                {
                  "x": 8.627,
                  "y": 1794.789
                },
                {
                  "x": 9.228,
                  "y": 1795.176
                },
                {
                  "x": 10.011,
                  "y": 1795.417
                },
                {
                  "x": 11.0,
                  "y": 1795.5
                }
              ]
            },
            {
              "startLaneIndex": 2,
              "endLaneIndex": 2,
              "points": [
                {
                  "x": 7.5,
                  "y": 1789.0
                },
                {
                  "x": 7.499,
                  "y": 1789.989
                },
                {
                  "x": 7.512,
                  "y": 1790.772
                },
                {
                  "x": 7.563,
                  "y": 1791.373
                },
                {
                  "x": 7.676,
                  "y": 1791.816
                },
                {
                  "x": 7.875,
                  "y": 1792.125
                },
                {
                  "x": 8.184,
                  "y": 1792.324
                },
                {
                  "x": 8.627,
                  "y": 1792.437
                },
                {
                  "x": 9.228,
                  "y": 1792.488
                },
                {
                  "x": 10.011,
                  "y": 1792.501
                },
                {
                  "x": 11.0,
                  "y": 1792.5
                }
              ]
            }
          ]
        },
        {
          "type": "go_straight",
          "startRoad": "road_1_6_1",
          "endRoad": "road_1_7_1",
          "direction": 1,
          "laneLinks": [
            {
              "startLaneIndex": 1,
              "endLaneIndex": 0,
              "points": [
                {
                  "x": 4.5,
                  "y": 1789.0
                },
                {
                  "x": 4.416,
                  "y": 1790.408
                },
                {
                  "x": 4.188,
                  "y": 1792.344
                },
                {
                  "x": 3.852,
                  "y": 1794.676
                },
                {
                  "x": 3.444,
                  "y": 1797.272
                },
                {
                  "x": 3.0,
                  "y": 1800.0
                },
                {
                  "x": 2.556,
                  "y": 1802.728
                },
                {
                  "x": 2.148,
                  "y": 1805.324
                },
                {
                  "x": 1.811999999999999,
                  "y": 1807.656
                },
                {
                  "x": 1.584,
                  "y": 1809.592
                },
                {
                  "x": 1.5,
                  "y": 1811.0
                }
              ]
            },
            {
              "startLaneIndex": 1,
              "endLaneIndex": 1,
              "points": [
                {
                  "x": 4.5,
                  "y": 1789.0
                },
                {
                  "x": 4.5,
                  "y": 1790.408
                },
                {
                  "x": 4.5,
                  "y": 1792.344
                },
                {
                  "x": 4.5,
                  "y": 1794.676
                },
                {
                  "x": 4.5,
                  "y": 1797.272
                },
                {
                  "x": 4.5,
                  "y": 1800.0
                },
                {
                  "x": 4.5,
                  "y": 1802.728
                },
                {
                  "x": 4.5,
                  "y": 1805.324
                },
                {
                  "x": 4.499999999999999,
                  "y": 1807.656
                },
                {
                  "x": 4.5,
                  "y": 1809.592
                },
                {
                  "x": 4.5,
                  "y": 1811.0
                }
              ]
            },
            {
              "startLaneIndex": 1,
              "endLaneIndex": 2,
              "points": [
                {
                  "x": 4.5,
                  "y": 1789.0
                },
                {
                  "x": 4.584,
                  "y": 1790.408
                },
                {
                  "x": 4.812,
                  "y": 1792.344
                },
                {
                  "x": 5.148,
                  "y": 1794.676
                },
                {
                  "x": 5.556,
                  "y": 1797.272
                },
                {
                  "x": 6.0,
                  "y": 1800.0
                },
                {
                  "x": 6.444,
                  "y": 1802.728
                },
                {
                  "x": 6.852,
                  "y": 1805.324
                },
                {
                  "x": 7.187999999999999,
                  "y": 1807.656
                },
                {
                  "x": 7.416,
                  "y": 1809.592
                },
                {
                  "x": 7.5,
                  "y": 1811.0
                }
              ]
            }
          ]
        },
        {
          "type": "turn_left",
          "startRoad": "road_1_6_1",
          "endRoad": "road_1_7_2",
          "direction": 1,
          "laneLinks": [
            {
              "startLaneIndex": 0,
              "endLaneIndex": 0,
              "points": [
                {
                  "x": 1.5,
                  "y": 1789.0
                },
                {
                  "x": 1.249,
                  "y": 1790.241
                },
                {
                  "x": 0.552,
                  "y": 1791.708
                },
                {
                  "x": -0.507,
                  "y": 1793.317
                },
                {
                  "x": -1.844,
                  "y": 1794.984
                },
                {
                  "x": -3.375,
                  "y": 1796.625
                },
                {
                  "x": -5.016,
                  "y": 1798.156
                },
                {
                  "x": -6.683,
                  "y": 1799.493
                },
                {
                  "x": -8.292,
                  "y": 1800.552
                },
                {
                  "x": -9.759,
                  "y": 1801.249
                },
                {
                  "x": -11.0,
                  "y": 1801.5
                }
              ]
            },
            {
              "startLaneIndex": 0,
              "endLaneIndex": 1,
              "points": [
                {
                  "x": 1.5,
                  "y": 1789.0
                },
                {
                  "x": 1.249,
                  "y": 1790.325
                },
                {
                  "x": 0.552,
                  "y": 1792.02
                },
                {
                  "x": -0.507,
                  "y": 1793.965
                },
                {
                  "x": -1.844,
                  "y": 1796.04
                },
                {
                  "x": -3.375,
                  "y": 1798.125
                },
                {
                  "x": -5.016,
                  "y": 1800.1
                },
                {
                  "x": -6.683,
                  "y": 1801.845
                },
                {
                  "x": -8.292,
                  "y": 1803.24
                },
                {
                  "x": -9.759,
                  "y": 1804.165
                },
                {
                  "x": -11.0,
                  "y": 1804.5
                }
              ]
            },
            {
              "startLaneIndex": 0,
              "endLaneIndex": 2,
              "points": [
                {
                  "x": 1.5,
                  "y": 1789.0
                },
                {
                  "x": 1.249,
                  "y": 1790.409
                },
                {
                  "x": 0.552,
                  "y": 1792.3319999999999
                },
                {
                  "x": -0.507,
                  "y": 1794.613
                },
                {
                  "x": -1.844,
                  "y": 1797.096
                },
                {
                  "x": -3.375,
                  "y": 1799.625
                },
                {
                  "x": -5.016,
                  "y": 1802.044
                },
                {
                  "x": -6.683,
                  "y": 1804.197
                },
                {
                  "x": -8.292,
                  "y": 1805.9279999999999
                },
                {
                  "x": -9.759,
                  "y": 1807.081
                },
                {
                  "x": -11.0,
                  "y": 1807.5
                }
              ]
            }
          ]
        },
        {
          "type": "turn_right",
          "startRoad": "road_2_7_2",
          "endRoad": "road_1_7_1",
          "direction": 2,
          "laneLinks": [
            {
              "startLaneIndex": 2,
              "endLaneIndex": 0,
              "points": [
                {
                  "x": 11.0,
                  "y": 1807.5
                },
                {
                  "x": 9.843,
                  "y": 1807.499
                },
                {
                  "x": 8.604,
                  "y": 1807.512
                },
                {
                  "x": 7.3309999999999995,
                  "y": 1807.563
                },
                {
                  "x": 6.072,
                  "y": 1807.676
                },
                {
                  "x": 4.875,
                  "y": 1807.875
                },
                {
                  "x": 3.788,
                  "y": 1808.184
                },
                {
                  "x": 2.859000000000001,
                  "y": 1808.627
                },
                {
                  "x": 2.136000000000001,
                  "y": 1809.228
                },
                {
                  "x": 1.6669999999999998,
                  "y": 1810.011
                },
                {
                  "x": 1.5,
                  "y": 1811.0
                }
              ]
            },
            {
              "startLaneIndex": 2,
              "endLaneIndex": 1,
              "points": [
                {
                  "x": 11.0,
                  "y": 1807.5
                },
                {
                  "x": 9.927,
                  "y": 1807.499
                },
                {
                  "x": 8.916,
                  "y": 1807.512
                },
                {
                  "x": 7.979,
                  "y": 1807.563
                },
                {
                  "x": 7.128,
                  "y": 1807.676
                },
                {
                  "x": 6.375,
                  "y": 1807.875
                },
                {
                  "x": 5.732,
                  "y": 1808.184
                },
                {
                  "x": 5.211000000000001,
                  "y": 1808.627
                },
                {
                  "x": 4.824000000000001,
                  "y": 1809.228
                },
                {
                  "x": 4.583,
                  "y": 1810.011
                },
                {
                  "x": 4.5,
                  "y": 1811.0
                }
              ]
            },
            {
              "startLaneIndex": 2,
              "endLaneIndex": 2,
              "points": [
                {
                  "x": 11.0,
                  "y": 1807.5
                },
                {
                  "x": 10.011,
                  "y": 1807.499
                },
                {
                  "x": 9.228,
                  "y": 1807.512
                },
                {
                  "x": 8.627,
                  "y": 1807.563
                },
                {
                  "x": 8.184,
                  "y": 1807.676
                },
                {
                  "x": 7.875,
                  "y": 1807.875
                },
                {
                  "x": 7.676,
                  "y": 1808.184
                },
                {
                  "x": 7.563000000000001,
                  "y": 1808.627
                },
                {
                  "x": 7.512000000000001,
                  "y": 1809.228
                },
                {
                  "x": 7.499,
                  "y": 1810.011
                },
                {
                  "x": 7.5,
                  "y": 1811.0
                }
              ]
            }
          ]
        },
        {
          "type": "go_straight",
          "startRoad": "road_2_7_2",
          "endRoad": "road_1_7_2",
          "direction": 2,
          "laneLinks": [
            {
              "startLaneIndex": 1,
              "endLaneIndex": 0,
              "points": [
                {
                  "x": 11.0,
                  "y": 1804.5
                },
                {
                  "x": 9.592,
                  "y": 1804.416
                },
                {
                  "x": 7.656,
                  "y": 1804.188
                },
                {
                  "x": 5.324,
                  "y": 1803.852
                },
                {
                  "x": 2.7279999999999998,
                  "y": 1803.444
                },
                {
                  "x": 0.0,
                  "y": 1803.0
                },
                {
                  "x": -2.7279999999999998,
                  "y": 1802.556
                },
                {
                  "x": -5.323999999999999,
                  "y": 1802.148
                },
                {
                  "x": -7.655999999999999,
                  "y": 1801.812
                },
                {
                  "x": -9.592,
                  "y": 1801.584
                },
                {
                  "x": -11.0,
                  "y": 1801.5
                }
              ]
            },
            {
              "startLaneIndex": 1,
              "endLaneIndex": 1,
              "points": [
                {
                  "x": 11.0,
                  "y": 1804.5
                },
                {
                  "x": 9.592,
                  "y": 1804.5
                },
                {
                  "x": 7.656,
                  "y": 1804.5
                },
                {
                  "x": 5.324,
                  "y": 1804.5
                },
                {
                  "x": 2.7279999999999998,
                  "y": 1804.5
                },
                {
                  "x": 0.0,
                  "y": 1804.5
                },
                {
                  "x": -2.7279999999999998,
                  "y": 1804.5
                },
                {
                  "x": -5.323999999999999,
                  "y": 1804.5
                },
                {
                  "x": -7.655999999999999,
                  "y": 1804.5
                },
                {
                  "x": -9.592,
                  "y": 1804.5
                },
                {
                  "x": -11.0,
                  "y": 1804.5
                }
              ]
            },
            {
              "startLaneIndex": 1,
              "endLaneIndex": 2,
              "points": [
                {
                  "x": 11.0,
                  "y": 1804.5
                },
                {
                  "x": 9.592,
                  "y": 1804.584
                },
                {
                  "x": 7.656,
                  "y": 1804.812
                },
                {
                  "x": 5.324,
                  "y": 1805.148
                },
                {
                  "x": 2.7279999999999998,
                  "y": 1805.556
                },
                {
                  "x": 0.0,
                  "y": 1806.0
                },
                {
                  "x": -2.7279999999999998,
                  "y": 1806.444
                },
                {
                  "x": -5.323999999999999,
                  "y": 1806.852
                },
                {
                  "x": -7.655999999999999,
                  "y": 1807.188
                },
                {
                  "x": -9.592,
                  "y": 1807.416
                },
                {
                  "x": -11.0,
                  "y": 1807.5
                }
              ]
            }
          ]
        },
        {
          "type": "turn_left",
          "startRoad": "road_2_7_2",
          "endRoad": "road_1_7_3",
          "direction": 2,
          "laneLinks": [
            {
              "startLaneIndex": 0,
              "endLaneIndex": 0,
              "points": [
                {
                  "x": 11.0,
                  "y": 1801.5
                },
                {
                  "x": 9.759,
                  "y": 1801.249
                },
                {
                  "x": 8.292,
                  "y": 1800.552
                },
                {
                  "x": 6.683,
                  "y": 1799.493
                },
                {
                  "x": 5.016,
                  "y": 1798.156
                },
                {
                  "x": 3.375,
                  "y": 1796.625
                },
                {
                  "x": 1.844,
                  "y": 1794.984
                },
                {
                  "x": 0.507000000000001,
                  "y": 1793.317
                },
                {
                  "x": -0.551999999999999,
                  "y": 1791.708
                },
                {
                  "x": -1.249,
                  "y": 1790.241
                },
                {
                  "x": -1.5,
                  "y": 1789.0
                }
              ]
            },
            {
              "startLaneIndex": 0,
              "endLaneIndex": 1,
              "points": [
                {
                  "x": 11.0,
                  "y": 1801.5
                },
                {
                  "x": 9.675,
                  "y": 1801.249
                },
                {
                  "x": 7.98,
                  "y": 1800.552
                },
                {
                  "x": 6.035,
                  "y": 1799.493
                },
                {
                  "x": 3.96,
                  "y": 1798.156
                },
                {
                  "x": 1.875,
                  "y": 1796.625
                },
                {
                  "x": -0.1,
                  "y": 1794.984
                },
                {
                  "x": -1.844999999999999,
                  "y": 1793.317
                },
                {
                  "x": -3.239999999999999,
                  "y": 1791.708
                },
                {
                  "x": -4.165,
                  "y": 1790.241
                },
                {
                  "x": -4.5,
                  "y": 1789.0
                }
              ]
            },
            {
              "startLaneIndex": 0,
              "endLaneIndex": 2,
              "points": [
                {
                  "x": 11.0,
                  "y": 1801.5
                },
                {
                  "x": 9.591,
                  "y": 1801.249
                },
                {
                  "x": 7.668,
                  "y": 1800.552
                },
                {
                  "x": 5.387,
                  "y": 1799.493
                },
                {
                  "x": 2.904,
                  "y": 1798.156
                },
                {
                  "x": 0.375,
                  "y": 1796.625
                },
                {
                  "x": -2.044,
                  "y": 1794.984
                },
                {
                  "x": -4.196999999999999,
                  "y": 1793.317
                },
                {
                  "x": -5.927999999999999,
                  "y": 1791.708
                },
                {
                  "x": -7.081,
                  "y": 1790.241
                },
                {
                  "x": -7.5,
                  "y": 1789.0
                }
              ]
            }
          ]
        },
        {
          "type": "turn_left",
          "startRoad": "road_1_8_3",
          "endRoad": "road_1_7_0",
          "direction": 3,
          "laneLinks": [
            {
              "startLaneIndex": 0,
              "endLaneIndex": 0,
              "points": [
                {
                  "x": -1.5,
                  "y": 1811.0
                },
                {
                  "x": -1.249,
                  "y": 1809.759
                },
                {
                  "x": -0.552,
                  "y": 1808.292
                },
                {
                  "x": 0.507,
                  "y": 1806.683
                },
                {
                  "x": 1.844,
                  "y": 1805.016
                },
                {
                  "x": 3.375,
                  "y": 1803.375
                },
                {
                  "x": 5.016,
                  "y": 1801.844
                },
                {
                  "x": 6.683,
                  "y": 1800.507
                },
                {
                  "x": 8.292,
                  "y": 1799.448
                },
                {
                  "x": 9.759,
                  "y": 1798.751
                },
                {
                  "x": 11.0,
                  "y": 1798.5
                }
              ]
            },
            {
              "startLaneIndex": 0,
              "endLaneIndex": 1,
              "points": [
                {
                  "x": -1.5,
                  "y": 1811.0
                },
                {
                  "x": -1.249,
                  "y": 1809.675
                },
                {
                  "x": -0.552,
                  "y": 1807.98
                },
                {
                  "x": 0.507,
                  "y": 1806.035
                },
                {
                  "x": 1.844,
                  "y": 1803.96
                },
                {
                  "x": 3.375,
                  "y": 1801.875
                },
                {
                  "x": 5.016,
                  "y": 1799.9
                },
                {
                  "x": 6.683,
                  "y": 1798.155
                },
                {
                  "x": 8.292,
                  "y": 1796.76
                },
                {
                  "x": 9.759,
                  "y": 1795.835
                },
                {
                  "x": 11.0,
                  "y": 1795.5
                }
              ]
            },
            {
              "startLaneIndex": 0,
              "endLaneIndex": 2,
              "points": [
                {
                  "x": -1.5,
                  "y": 1811.0
                },
                {
                  "x": -1.249,
                  "y": 1809.591
                },
                {
                  "x": -0.552,
                  "y": 1807.668
                },
                {
                  "x": 0.507,
                  "y": 1805.387
                },
                {
                  "x": 1.844,
                  "y": 1802.904
                },
                {
                  "x": 3.375,
                  "y": 1800.375
                },
                {
                  "x": 5.016,
                  "y": 1797.956
                },
                {
                  "x": 6.683,
                  "y": 1795.8029999999999
                },
                {
                  "x": 8.292,
                  "y": 1794.072
                },
                {
                  "x": 9.759,
                  "y": 1792.919
                },
                {
                  "x": 11.0,
                  "y": 1792.5
                }
              ]
            }
          ]
        },
        {
          "type": "turn_right",
          "startRoad": "road_1_8_3",
          "endRoad": "road_1_7_2",
          "direction": 3,
          "laneLinks": [
            {
              "startLaneIndex": 2,
              "endLaneIndex": 0,
              "points": [
                {
                  "x": -7.5,
                  "y": 1811.0
                },
                {
                  "x": -7.499,
                  "y": 1809.843
                },
                {
                  "x": -7.512,
                  "y": 1808.604
                },
                {
                  "x": -7.563,
                  "y": 1807.331
                },
                {
                  "x": -7.676,
                  "y": 1806.072
                },
                {
                  "x": -7.875,
                  "y": 1804.875
                },
                {
                  "x": -8.184,
                  "y": 1803.788
                },
                {
                  "x": -8.627,
                  "y": 1802.859
                },
                {
                  "x": -9.228,
                  "y": 1802.136
                },
                {
                  "x": -10.011,
                  "y": 1801.667
                },
                {
                  "x": -11.0,
                  "y": 1801.5
                }
              ]
            },
            {
              "startLaneIndex": 2,
              "endLaneIndex": 1,
              "points": [
                {
                  "x": -7.5,
                  "y": 1811.0
                },
                {
                  "x": -7.499,
                  "y": 1809.927
                },
                {
                  "x": -7.512,
                  "y": 1808.916
                },
                {
                  "x": -7.563,
                  "y": 1807.979
                },
                {
                  "x": -7.676,
                  "y": 1807.128
                },
                {
                  "x": -7.875,
                  "y": 1806.375
                },
                {
                  "x": -8.184,
                  "y": 1805.732
                },
                {
                  "x": -8.627,
                  "y": 1805.211
                },
                {
                  "x": -9.228,
                  "y": 1804.824
                },
                {
                  "x": -10.011,
                  "y": 1804.583
                },
                {
                  "x": -11.0,
                  "y": 1804.5
                }
              ]
            },
            {
              "startLaneIndex": 2,
              "endLaneIndex": 2,
              "points": [
                {
                  "x": -7.5,
                  "y": 1811.0
                },
                {
                  "x": -7.499,
                  "y": 1810.011
                },
                {
                  "x": -7.512,
                  "y": 1809.228
                },
                {
                  "x": -7.563,
                  "y": 1808.627
                },
                {
                  "x": -7.676,
                  "y": 1808.184
                },
                {
                  "x": -7.875,
                  "y": 1807.875
                },
                {
                  "x": -8.184,
                  "y": 1807.676
                },
                {
                  "x": -8.627,
                  "y": 1807.563
                },
                {
                  "x": -9.228,
                  "y": 1807.512
                },
                {
                  "x": -10.011,
                  "y": 1807.499
                },
                {
                  "x": -11.0,
                  "y": 1807.5
                }
              ]
            }
          ]
        },
        {
          "type": "go_straight",
          "startRoad": "road_1_8_3",
          "endRoad": "road_1_7_3",
          "direction": 3,
          "laneLinks": [
            {
              "startLaneIndex": 1,
              "endLaneIndex": 0,
              "points": [
                {
                  "x": -4.5,
                  "y": 1811.0
                },
                {
                  "x": -4.416,
                  "y": 1809.592
                },
                {
                  "x": -4.188,
                  "y": 1807.656
                },
                {
                  "x": -3.852,
                  "y": 1805.324
                },
                {
                  "x": -3.444,
                  "y": 1802.728
                },
                {
                  "x": -3.0,
                  "y": 1800.0
                },
                {
                  "x": -2.556,
                  "y": 1797.272
                },
                {
                  "x": -2.148,
                  "y": 1794.676
                },
                {
                  "x": -1.811999999999999,
                  "y": 1792.344
                },
                {
                  "x": -1.584,
                  "y": 1790.408
                },
                {
                  "x": -1.5,
                  "y": 1789.0
                }
              ]
            },
            {
              "startLaneIndex": 1,
              "endLaneIndex": 1,
              "points": [
                {
                  "x": -4.5,
                  "y": 1811.0
                },
                {
                  "x": -4.5,
                  "y": 1809.592
                },
                {
                  "x": -4.5,
                  "y": 1807.656
                },
                {
                  "x": -4.5,
                  "y": 1805.324
                },
                {
                  "x": -4.5,
                  "y": 1802.728
                },
                {
                  "x": -4.5,
                  "y": 1800.0
                },
                {
                  "x": -4.5,
                  "y": 1797.272
                },
                {
                  "x": -4.5,
                  "y": 1794.676
                },
                {
                  "x": -4.499999999999999,
                  "y": 1792.344
                },
                {
                  "x": -4.5,
                  "y": 1790.408
                },
                {
                  "x": -4.5,
                  "y": 1789.0
                }
              ]
            },
            {
              "startLaneIndex": 1,
              "endLaneIndex": 2,
              "points": [
                {
                  "x": -4.5,
                  "y": 1811.0
                },
                {
                  "x": -4.584,
                  "y": 1809.592
                },
                {
                  "x": -4.812,
                  "y": 1807.656
                },
                {
                  "x": -5.148,
                  "y": 1805.324
                },
                {
                  "x": -5.556,
                  "y": 1802.728
                },
                {
                  "x": -6.0,
                  "y": 1800.0
                },
                {
                  "x": -6.444,
                  "y": 1797.272
                },
                {
                  "x": -6.852,
                  "y": 1794.676
                },
                {
                  "x": -7.187999999999999,
                  "y": 1792.344
                },
                {
                  "x": -7.416,
                  "y": 1790.408
                },
                {
                  "x": -7.5,
                  "y": 1789.0
                }
              ]
            }
          ]
        }
      ],
      "trafficLight": {
        "roadLinkIndices": [
          0,
          1,
          2,
          3,
          4,
          5,
          6,
          7,
          8,
          9,
          10,
          11
        ],
        "lightphases": [
          {
            "time": 5,
            "availableRoadLinks": [
              10,
              2,
              3,
              6
            ]
          },
          {
            "time": 30,
            "availableRoadLinks": [
              0,
              2,
              3,
              6,
              7,
              10
            ]
          },
          {
            "time": 30,
            "availableRoadLinks": [
              2,
              3,
              4,
              6,
              10,
              11
            ]
          },
          {
            "time": 30,
            "availableRoadLinks": [
              1,
              2,
              3,
              6,
              8,
              10
            ]
          },
          {
            "time": 30,
            "availableRoadLinks": [
              2,
              3,
              5,
              6,
              9,
              10
            ]
          },
          {
            "time": 30,
            "availableRoadLinks": [
              0,
              1,
              2,
              3,
              6,
              10
            ]
          },
          {
            "time": 30,
            "availableRoadLinks": [
              2,
              3,
              6,
              7,
              8,
              10
            ]
          },
          {
            "time": 30,
            "availableRoadLinks": [
              2,
              3,
              4,
              5,
              6,
              10
            ]
          },
          {
            "time": 30,
            "availableRoadLinks": [
              2,
              3,
              6,
              9,
              10,
              11
            ]
          }
        ]
      },
      "virtual": false
    },
    {
      "id": "intersection_1_8",
      "point": {
        "x": 0,
        "y": 2100
      },
      "width": 11,
      "roads": [
        "road_0_8_0",
        "road_1_7_1",
        "road_2_8_2",
        "road_1_9_3",
        "road_1_8_0",
        "road_1_8_1",
        "road_1_8_2",
        "road_1_8_3"
      ],
      "roadLinks": [
        {
          "type": "go_straight",
          "startRoad": "road_0_8_0",
          "endRoad": "road_1_8_0",
          "direction": 0,
          "laneLinks": [
            {
              "startLaneIndex": 1,
              "endLaneIndex": 0,
              "points": [
                {
                  "x": -11.0,
                  "y": 2095.5
                },
                {
                  "x": -9.592,
                  "y": 2095.584
                },
                {
                  "x": -7.656,
                  "y": 2095.812
                },
                {
                  "x": -5.324,
                  "y": 2096.148
                },
                {
                  "x": -2.7279999999999998,
                  "y": 2096.556
                },
                {
                  "x": 0.0,
                  "y": 2097.0
                },
                {
                  "x": 2.7279999999999998,
                  "y": 2097.444
                },
                {
                  "x": 5.323999999999999,
                  "y": 2097.852
                },
                {
                  "x": 7.655999999999999,
                  "y": 2098.188
                },
                {
                  "x": 9.592,
                  "y": 2098.416
                },
                {
                  "x": 11.0,
                  "y": 2098.5
                }
              ]
            },
            {
              "startLaneIndex": 1,
              "endLaneIndex": 1,
              "points": [
                {
                  "x": -11.0,
                  "y": 2095.5
                },
                {
                  "x": -9.592,
                  "y": 2095.5
                },
                {
                  "x": -7.656,
                  "y": 2095.5
                },
                {
                  "x": -5.324,
                  "y": 2095.5
                },
                {
                  "x": -2.7279999999999998,
                  "y": 2095.5
                },
                {
                  "x": 0.0,
                  "y": 2095.5
                },
                {
                  "x": 2.7279999999999998,
                  "y": 2095.5
                },
                {
                  "x": 5.323999999999999,
                  "y": 2095.5
                },
                {
                  "x": 7.655999999999999,
                  "y": 2095.5
                },
                {
                  "x": 9.592,
                  "y": 2095.5
                },
                {
                  "x": 11.0,
                  "y": 2095.5
                }
              ]
            },
            {
              "startLaneIndex": 1,
              "endLaneIndex": 2,
              "points": [
                {
                  "x": -11.0,
                  "y": 2095.5
                },
                {
                  "x": -9.592,
                  "y": 2095.416
                },
                {
                  "x": -7.656,
                  "y": 2095.188
                },
                {
                  "x": -5.324,
                  "y": 2094.852
                },
                {
                  "x": -2.7279999999999998,
                  "y": 2094.444
                },
                {
                  "x": 0.0,
                  "y": 2094.0
                },
                {
                  "x": 2.7279999999999998,
                  "y": 2093.556
                },
                {
                  "x": 5.323999999999999,
                  "y": 2093.148
                },
                {
                  "x": 7.655999999999999,
                  "y": 2092.812
                },
                {
                  "x": 9.592,
                  "y": 2092.5840000000003
                },
                {
                  "x": 11.0,
                  "y": 2092.5
                }
              ]
            }
          ]
        },
        {
          "type": "turn_left",
          "startRoad": "road_0_8_0",
          "endRoad": "road_1_8_1",
          "direction": 0,
          "laneLinks": [
            {
              "startLaneIndex": 0,
              "endLaneIndex": 0,
              "points": [
                {
                  "x": -11.0,
                  "y": 2098.5
                },
                {
                  "x": -9.759,
                  "y": 2098.751
                },
                {
                  "x": -8.292,
                  "y": 2099.448
                },
                {
                  "x": -6.683,
                  "y": 2100.507
                },
                {
                  "x": -5.016,
                  "y": 2101.844
                },
                {
                  "x": -3.375,
                  "y": 2103.375
                },
                {
                  "x": -1.844,
                  "y": 2105.016
                },
                {
                  "x": -0.507000000000001,
                  "y": 2106.683
                },
                {
                  "x": 0.551999999999999,
                  "y": 2108.292
                },
                {
                  "x": 1.249,
                  "y": 2109.759
                },
                {
                  "x": 1.5,
                  "y": 2111.0
                }
              ]
            },
            {
              "startLaneIndex": 0,
              "endLaneIndex": 1,
              "points": [
                {
                  "x": -11.0,
                  "y": 2098.5
                },
                {
                  "x": -9.675,
                  "y": 2098.751
                },
                {
                  "x": -7.98,
                  "y": 2099.448
                },
                {
                  "x": -6.035,
                  "y": 2100.507
                },
                {
                  "x": -3.96,
                  "y": 2101.844
                },
                {
                  "x": -1.875,
                  "y": 2103.375
                },
                {
                  "x": 0.1,
                  "y": 2105.016
                },
                {
                  "x": 1.844999999999999,
                  "y": 2106.683
                },
                {
                  "x": 3.239999999999999,
                  "y": 2108.292
                },
                {
                  "x": 4.165,
                  "y": 2109.759
                },
                {
                  "x": 4.5,
                  "y": 2111.0
                }
              ]
            },
            {
              "startLaneIndex": 0,
              "endLaneIndex": 2,
              "points": [
                {
                  "x": -11.0,
                  "y": 2098.5
                },
                {
                  "x": -9.591,
                  "y": 2098.751
                },
                {
                  "x": -7.668,
                  "y": 2099.448
                },
                {
                  "x": -5.387,
                  "y": 2100.507
                },
                {
                  "x": -2.904,
                  "y": 2101.844
                },
                {
                  "x": -0.375,
                  "y": 2103.375
                },
                {
                  "x": 2.044,
                  "y": 2105.016
                },
                {
                  "x": 4.196999999999999,
                  "y": 2106.683
                },
                {
                  "x": 5.927999999999999,
                  "y": 2108.292
                },
                {
                  "x": 7.081,
                  "y": 2109.759
                },
                {
                  "x": 7.5,
                  "y": 2111.0
                }
              ]
            }
          ]
        },
        {
          "type": "turn_right",
          "startRoad": "road_0_8_0",
          "endRoad": "road_1_8_3",
          "direction": 0,
          "laneLinks": [
            {
              "startLaneIndex": 2,
              "endLaneIndex": 0,
              "points": [
                {
                  "x": -11.0,
                  "y": 2092.5
                },
                {
                  "x": -9.843,
                  "y": 2092.501
                },
                {
                  "x": -8.604,
                  "y": 2092.488
                },
                {
                  "x": -7.3309999999999995,
                  "y": 2092.437
                },
                {
                  "x": -6.072,
                  "y": 2092.324
                },
                {
                  "x": -4.875,
                  "y": 2092.125
                },
                {
                  "x": -3.788,
                  "y": 2091.816
                },
                {
                  "x": -2.859000000000001,
                  "y": 2091.373
                },
                {
                  "x": -2.136000000000001,
                  "y": 2090.772
                },
                {
                  "x": -1.6669999999999998,
                  "y": 2089.989
                },
                {
                  "x": -1.5,
                  "y": 2089.0
                }
              ]
            },
            {
              "startLaneIndex": 2,
              "endLaneIndex": 1,
              "points": [
                {
                  "x": -11.0,
                  "y": 2092.5
                },
                {
                  "x": -9.927,
                  "y": 2092.501
                },
                {
                  "x": -8.916,
                  "y": 2092.488
                },
                {
                  "x": -7.979,
                  "y": 2092.437
                },
                {
                  "x": -7.128,
                  "y": 2092.324
                },
                {
                  "x": -6.375,
                  "y": 2092.125
                },
                {
                  "x": -5.732,
                  "y": 2091.816
                },
                {
                  "x": -5.211000000000001,
                  "y": 2091.373
                },
                {
                  "x": -4.824000000000001,
                  "y": 2090.772
                },
                {
                  "x": -4.583,
                  "y": 2089.989
                },
                {
                  "x": -4.5,
                  "y": 2089.0
                }
              ]
            },
            {
              "startLaneIndex": 2,
              "endLaneIndex": 2,
              "points": [
                {
                  "x": -11.0,
                  "y": 2092.5
                },
                {
                  "x": -10.011,
                  "y": 2092.501
                },
                {
                  "x": -9.228,
                  "y": 2092.488
                },
                {
                  "x": -8.627,
                  "y": 2092.437
                },
                {
                  "x": -8.184,
                  "y": 2092.324
                },
                {
                  "x": -7.875,
                  "y": 2092.125
                },
                {
                  "x": -7.676,
                  "y": 2091.816
                },
                {
                  "x": -7.563000000000001,
                  "y": 2091.373
                },
                {
                  "x": -7.512000000000001,
                  "y": 2090.772
                },
                {
                  "x": -7.499,
                  "y": 2089.989
                },
                {
                  "x": -7.5,
                  "y": 2089.0
                }
              ]
            }
          ]
        },
        {
          "type": "turn_right",
          "startRoad": "road_1_7_1",
          "endRoad": "road_1_8_0",
          "direction": 1,
          "laneLinks": [
            {
              "startLaneIndex": 2,
              "endLaneIndex": 0,
              "points": [
                {
                  "x": 7.5,
                  "y": 2089.0
                },
                {
                  "x": 7.499,
                  "y": 2090.157
                },
                {
                  "x": 7.512,
                  "y": 2091.396
                },
                {
                  "x": 7.563,
                  "y": 2092.669
                },
                {
                  "x": 7.676,
                  "y": 2093.928
                },
                {
                  "x": 7.875,
                  "y": 2095.125
                },
                {
                  "x": 8.184,
                  "y": 2096.212
                },
                {
                  "x": 8.627,
                  "y": 2097.141
                },
                {
                  "x": 9.228,
                  "y": 2097.864
                },
                {
                  "x": 10.011,
                  "y": 2098.333
                },
                {
                  "x": 11.0,
                  "y": 2098.5
                }
              ]
            },
            {
              "startLaneIndex": 2,
              "endLaneIndex": 1,
              "points": [
                {
                  "x": 7.5,
                  "y": 2089.0
                },
                {
                  "x": 7.499,
                  "y": 2090.073
                },
                {
                  "x": 7.512,
                  "y": 2091.084
                },
                {
                  "x": 7.563,
                  "y": 2092.021
                },
                {
                  "x": 7.676,
                  "y": 2092.872
                },
                {
                  "x": 7.875,
                  "y": 2093.625
                },
                {
                  "x": 8.184,
                  "y": 2094.268
                },
                {
                  "x": 8.627,
                  "y": 2094.7889999999998
                },
                {
                  "x": 9.228,
                  "y": 2095.176
                },
                {
                  "x": 10.011,
                  "y": 2095.417
                },
                {
                  "x": 11.0,
                  "y": 2095.5
                }
              ]
            },
            {
              "startLaneIndex": 2,
              "endLaneIndex": 2,
              "points": [
                {
                  "x": 7.5,
                  "y": 2089.0
                },
                {
                  "x": 7.499,
                  "y": 2089.989
                },
                {
                  "x": 7.512,
                  "y": 2090.772
                },
                {
                  "x": 7.563,
                  "y": 2091.373
                },
                {
                  "x": 7.676,
                  "y": 2091.816
                },
                {
                  "x": 7.875,
                  "y": 2092.125
                },
                {
                  "x": 8.184,
                  "y": 2092.324
                },
                {
                  "x": 8.627,
                  "y": 2092.437
                },
                {
                  "x": 9.228,
                  "y": 2092.488
                },
                {
                  "x": 10.011,
                  "y": 2092.501
                },
                {
                  "x": 11.0,
                  "y": 2092.5
                }
              ]
            }
          ]
        },
        {
          "type": "go_straight",
          "startRoad": "road_1_7_1",
          "endRoad": "road_1_8_1",
          "direction": 1,
          "laneLinks": [
            {
              "startLaneIndex": 1,
              "endLaneIndex": 0,
              "points": [
                {
                  "x": 4.5,
                  "y": 2089.0
                },
                {
                  "x": 4.416,
                  "y": 2090.408
                },
                {
                  "x": 4.188,
                  "y": 2092.344
                },
                {
                  "x": 3.852,
                  "y": 2094.676
                },
                {
                  "x": 3.444,
                  "y": 2097.272
                },
                {
                  "x": 3.0,
                  "y": 2100.0
                },
                {
                  "x": 2.556,
                  "y": 2102.728
                },
                {
                  "x": 2.148,
                  "y": 2105.324
                },
                {
                  "x": 1.811999999999999,
                  "y": 2107.656
                },
                {
                  "x": 1.584,
                  "y": 2109.592
                },
                {
                  "x": 1.5,
                  "y": 2111.0
                }
              ]
            },
            {
              "startLaneIndex": 1,
              "endLaneIndex": 1,
              "points": [
                {
                  "x": 4.5,
                  "y": 2089.0
                },
                {
                  "x": 4.5,
                  "y": 2090.408
                },
                {
                  "x": 4.5,
                  "y": 2092.344
                },
                {
                  "x": 4.5,
                  "y": 2094.676
                },
                {
                  "x": 4.5,
                  "y": 2097.272
                },
                {
                  "x": 4.5,
                  "y": 2100.0
                },
                {
                  "x": 4.5,
                  "y": 2102.728
                },
                {
                  "x": 4.5,
                  "y": 2105.324
                },
                {
                  "x": 4.499999999999999,
                  "y": 2107.656
                },
                {
                  "x": 4.5,
                  "y": 2109.592
                },
                {
                  "x": 4.5,
                  "y": 2111.0
                }
              ]
            },
            {
              "startLaneIndex": 1,
              "endLaneIndex": 2,
              "points": [
                {
                  "x": 4.5,
                  "y": 2089.0
                },
                {
                  "x": 4.584,
                  "y": 2090.408
                },
                {
                  "x": 4.812,
                  "y": 2092.344
                },
                {
                  "x": 5.148,
                  "y": 2094.676
                },
                {
                  "x": 5.556,
                  "y": 2097.272
                },
                {
                  "x": 6.0,
                  "y": 2100.0
                },
                {
                  "x": 6.444,
                  "y": 2102.728
                },
                {
                  "x": 6.852,
                  "y": 2105.324
                },
                {
                  "x": 7.187999999999999,
                  "y": 2107.656
                },
                {
                  "x": 7.416,
                  "y": 2109.592
                },
                {
                  "x": 7.5,
                  "y": 2111.0
                }
              ]
            }
          ]
        },
        {
          "type": "turn_left",
          "startRoad": "road_1_7_1",
          "endRoad": "road_1_8_2",
          "direction": 1,
          "laneLinks": [
            {
              "startLaneIndex": 0,
              "endLaneIndex": 0,
              "points": [
                {
                  "x": 1.5,
                  "y": 2089.0
                },
                {
                  "x": 1.249,
                  "y": 2090.241
                },
                {
                  "x": 0.552,
                  "y": 2091.708
                },
                {
                  "x": -0.507,
                  "y": 2093.317
                },
                {
                  "x": -1.844,
                  "y": 2094.984
                },
                {
                  "x": -3.375,
                  "y": 2096.625
                },
                {
                  "x": -5.016,
                  "y": 2098.156
                },
                {
                  "x": -6.683,
                  "y": 2099.493
                },
                {
                  "x": -8.292,
                  "y": 2100.552
                },
                {
                  "x": -9.759,
                  "y": 2101.2490000000003
                },
                {
                  "x": -11.0,
                  "y": 2101.5
                }
              ]
            },
            {
              "startLaneIndex": 0,
              "endLaneIndex": 1,
              "points": [
                {
                  "x": 1.5,
                  "y": 2089.0
                },
                {
                  "x": 1.249,
                  "y": 2090.325
                },
                {
                  "x": 0.552,
                  "y": 2092.02
                },
                {
                  "x": -0.507,
                  "y": 2093.965
                },
                {
                  "x": -1.844,
                  "y": 2096.04
                },
                {
                  "x": -3.375,
                  "y": 2098.125
                },
                {
                  "x": -5.016,
                  "y": 2100.1
                },
                {
                  "x": -6.683,
                  "y": 2101.845
                },
                {
                  "x": -8.292,
                  "y": 2103.24
                },
                {
[truncated: 9,880,457 more chars]
