# Supplementary material
Source: ML conference proceedings conference paper supplement (https://proceedings.neurips.cc/paper_files/paper/2021/hash/654516d1b4df6917094de807156adc14-Abstract.html)
Supplement: Supplementary file 1 [file 654516d1b4df6917094de807156adc14-Supplemental.zip › neurips-supplementary/codes/data/template_ls/1_1/cross.2phases_rou01_equal_400.xml]

<routes>
    <flow id="0" type="Car" begin="0" end="3600" vehsPerHour="200" from="edge-inter0_0.nodeW-inter0_0" to="edge-inter0_0-inter0_0.nodeE" departLane="best" departSpeed="0.0"/>
    <flow id="1" type="Car" begin="0" end="3600" vehsPerHour="200" from="edge-inter0_0.nodeE-inter0_0" to="edge-inter0_0-inter0_0.nodeW" departLane="best" departSpeed="0.0"/>
    <flow id="2" type="Car" begin="0" end="3600" vehsPerHour="200" from="edge-inter0_0.nodeN-inter0_0" to="edge-inter0_0-inter0_0.nodeS" departLane="best" departSpeed="0.0"/>
    <flow id="3" type="Car" begin="0" end="3600" vehsPerHour="200" from="edge-inter0_0.nodeS-inter0_0" to="edge-inter0_0-inter0_0.nodeN" departLane="best" departSpeed="0.0"/>

    <flow id="4" type="Car" begin="0" end="3600" vehsPerHour="200" from="edge-inter0_0.nodeW-inter0_0" to="edge-inter0_0-inter0_0.nodeN" departLane="best" departSpeed="0.0"/>
    <flow id="5" type="Car" begin="0" end="3600" vehsPerHour="200" from="edge-inter0_0.nodeE-inter0_0" to="edge-inter0_0-inter0_0.nodeS" departLane="best" departSpeed="0.0"/>
    <flow id="6" type="Car" begin="0" end="3600" vehsPerHour="200" from="edge-inter0_0.nodeN-inter0_0" to="edge-inter0_0-inter0_0.nodeE" departLane="best" departSpeed="0.0"/>
    <flow id="7" type="Car" begin="0" end="3600" vehsPerHour="200" from="edge-inter0_0.nodeS-inter0_0" to="edge-inter0_0-inter0_0.nodeW" departLane="best" departSpeed="0.0"/>
</routes>
