# Supplementary material
Source: ML conference proceedings conference paper supplement (https://proceedings.neurips.cc/paper_files/paper/2021/hash/654516d1b4df6917094de807156adc14-Abstract.html)
Supplement: Supplementary file 1 [file 654516d1b4df6917094de807156adc14-Supplemental.zip › neurips-supplementary/codes/data/template_ls/1_1/cross.car.type.xml]

<additional>
<vType id="Car" accel="2.0" decel="4.5" sigma="0" tau="1.5" length="5" minGap="2.5" maxSpeed="11.111" guiShape="passenger"/>
</additional>
