# Supplementary material
Source: ML conference proceedings conference paper supplement (https://proceedings.neurips.cc/paper_files/paper/2021/hash/654516d1b4df6917094de807156adc14-Abstract.html)
Supplement: Supplementary file 1 [file 654516d1b4df6917094de807156adc14-Supplemental.zip › neurips-supplementary/codes/data/template_ls/1_1/cross.edg.xml]

<edges>
<edge id="edge-inter0_0.nodeN-inter0_0" from="inter0_0.nodeN" to="inter0_0" numLanes="2" width="3" type="unitype" />
<edge id="edge-inter0_0.nodeE-inter0_0" from="inter0_0.nodeE" to="inter0_0" numLanes="2" width="3" type="unitype" />
<edge id="edge-inter0_0.nodeS-inter0_0" from="inter0_0.nodeS" to="inter0_0" numLanes="2" width="3" type="unitype" />
<edge id="edge-inter0_0.nodeW-inter0_0" from="inter0_0.nodeW" to="inter0_0" numLanes="2" width="3" type="unitype" />
<edge id="edge-inter0_0-inter0_0.nodeN" from="inter0_0" to="inter0_0.nodeN" numLanes="2" width="3" type="unitype" />
<edge id="edge-inter0_0-inter0_0.nodeE" from="inter0_0" to="inter0_0.nodeE" numLanes="2" width="3" type="unitype" />
<edge id="edge-inter0_0-inter0_0.nodeS" from="inter0_0" to="inter0_0.nodeS" numLanes="2" width="3" type="unitype" />
<edge id="edge-inter0_0-inter0_0.nodeW" from="inter0_0" to="inter0_0.nodeW" numLanes="2" width="3" type="unitype" />
</edges>
