# Supplementary material
Source: ML conference proceedings conference paper supplement (https://proceedings.neurips.cc/paper_files/paper/2021/hash/654516d1b4df6917094de807156adc14-Abstract.html)
Supplement: Supplementary file 1 [file 654516d1b4df6917094de807156adc14-Supplemental.zip › neurips-supplementary/codes/data/template_ls/1_1/cross.net.xml]

<?xml version="1.0" encoding="UTF-8"?>

<!-- generated on Tue Dec 11 18:28:20 2018 by SUMO netconvert Version 0.32.0
<?xml version="1.0" encoding="UTF-8"?>

<configuration xmlns:xsi="http://www.w3.org/2001/XMLSchema-instance" xsi:noNamespaceSchemaLocation="http://sumo.dlr.de/xsd/netconvertConfiguration.xsd">

    <input>
        <node-files value="cross.nod.xml"/>
        <edge-files value="cross.edg.xml"/>
        <connection-files value="cross.con.xml"/>
        <tllogic-files value="cross.tll.xml"/>
        <type-files value="cross.typ.xml"/>
    </input>

    <output>
        <output-file value="cross.net.xml"/>
    </output>

    <processing>
        <no-turnarounds value="true"/>
    </processing>

    <report>
        <verbose value="true"/>
    </report>

</configuration>
-->

<net version="0.27" xmlns:xsi="http://www.w3.org/2001/XMLSchema-instance" xsi:noNamespaceSchemaLocation="http://sumo.dlr.de/xsd/net_file.xsd">

    <location netOffset="0.00,0.00" convBoundary="0.00,0.00,600.00,600.00" origBoundary="0.00,0.00,600.00,600.00" projParameter="!"/>

    <type id="unitype" speed="16.67"/>

    <edge id=":inter0_0_0" function="internal">
        <lane id=":inter0_0_0_0" index="0" speed="16.67" length="15.30" width="3.00" shape="295.35,307.65 295.35,292.35"/>
    </edge>
    <edge id=":inter0_0_1" function="internal">
        <lane id=":inter0_0_1_0" index="0" speed="16.67" length="14.84" width="3.00" shape="298.45,307.65 299.02,303.62 300.75,300.75 303.62,299.02 307.65,298.45"/>
    </edge>
    <edge id=":inter0_0_2" function="internal">
        <lane id=":inter0_0_2_0" index="0" speed="16.67" length="15.30" width="3.00" shape="307.65,304.65 292.35,304.65"/>
    </edge>
    <edge id=":inter0_0_3" function="internal">
        <lane id=":inter0_0_3_0" index="0" speed="16.67" length="14.84" width="3.00" shape="307.65,301.55 303.62,300.98 300.75,299.25 299.02,296.38 298.45,292.35"/>
    </edge>
    <edge id=":inter0_0_4" function="internal">
        <lane id=":inter0_0_4_0" index="0" speed="16.67" length="15.30" width="3.00" shape="304.65,292.35 304.65,307.65"/>
    </edge>
    <edge id=":inter0_0_5" function="internal">
        <lane id=":inter0_0_5_0" index="0" speed="16.67" length="14.84" width="3.00" shape="301.55,292.35 300.98,296.38 299.25,299.25 296.38,300.98 292.35,301.55"/>
    </edge>
    <edge id=":inter0_0_6" function="internal">
        <lane id=":inter0_0_6_0" index="0" speed="16.67" length="15.30" width="3.00" shape="292.35,295.35 307.65,295.35"/>
    </edge>
    <edge id=":inter0_0_7" function="internal">
        <lane id=":inter0_0_7_0" index="0" speed="16.67" length="14.84" width="3.00" shape="292.35,298.45 296.38,299.02 299.25,300.75 300.98,303.62 301.55,307.65"/>
    </edge>

    <edge id="edge-inter0_0-inter0_0.nodeE" from="inter0_0" to="inter0_0.nodeE" priority="-1" type="unitype">
        <lane id="edge-inter0_0-inter0_0.nodeE_0" index="0" speed="16.67" length="292.35" width="3.00" shape="307.65,295.35 600.00,295.35"/>
        <lane id="edge-inter0_0-inter0_0.nodeE_1" index="1" speed="16.67" length="292.35" width="3.00" shape="307.65,298.45 600.00,298.45"/>
    </edge>
    <edge id="edge-inter0_0-inter0_0.nodeN" from="inter0_0" to="inter0_0.nodeN" priority="-1" type="unitype">
        <lane id="edge-inter0_0-inter0_0.nodeN_0" index="0" speed="16.67" length="292.35" width="3.00" shape="304.65,307.65 304.65,600.00"/>
        <lane id="edge-inter0_0-inter0_0.nodeN_1" index="1" speed="16.67" length="292.35" width="3.00" shape="301.55,307.65 301.55,600.00"/>
    </edge>
    <edge id="edge-inter0_0-inter0_0.nodeS" from="inter0_0" to="inter0_0.nodeS" priority="-1" type="unitype">
        <lane id="edge-inter0_0-inter0_0.nodeS_0" index="0" speed="16.67" length="292.35" width="3.00" shape="295.35,292.35 295.35,0.00"/>
        <lane id="edge-inter0_0-inter0_0.nodeS_1" index="1" speed="16.67" length="292.35" width="3.00" shape="298.45,292.35 298.45,0.00"/>
    </edge>
    <edge id="edge-inter0_0-inter0_0.nodeW" from="inter0_0" to="inter0_0.nodeW" priority="-1" type="unitype">
        <lane id="edge-inter0_0-inter0_0.nodeW_0" index="0" speed="16.67" length="292.35" width="3.00" shape="292.35,304.65 0.00,304.65"/>
        <lane id="edge-inter0_0-inter0_0.nodeW_1" index="1" speed="16.67" length="292.35" width="3.00" shape="292.35,301.55 0.00,301.55"/>
    </edge>
    <edge id="edge-inter0_0.nodeE-inter0_0" from="inter0_0.nodeE" to="inter0_0" priority="-1" type="unitype">
        <lane id="edge-inter0_0.nodeE-inter0_0_0" index="0" speed="16.67" length="292.35" width="3.00" shape="600.00,304.65 307.65,304.65"/>
        <lane id="edge-inter0_0.nodeE-inter0_0_1" index="1" speed="16.67" length="292.35" width="3.00" shape="600.00,301.55 307.65,301.55"/>
    </edge>
    <edge id="edge-inter0_0.nodeN-inter0_0" from="inter0_0.nodeN" to="inter0_0" priority="-1" type="unitype">
        <lane id="edge-inter0_0.nodeN-inter0_0_0" index="0" speed="16.67" length="292.35" width="3.00" shape="295.35,600.00 295.35,307.65"/>
        <lane id="edge-inter0_0.nodeN-inter0_0_1" index="1" speed="16.67" length="292.35" width="3.00" shape="298.45,600.00 298.45,307.65"/>
    </edge>
    <edge id="edge-inter0_0.nodeS-inter0_0" from="inter0_0.nodeS" to="inter0_0" priority="-1" type="unitype">
        <lane id="edge-inter0_0.nodeS-inter0_0_0" index="0" speed="16.67" length="292.35" width="3.00" shape="304.65,0.00 304.65,292.35"/>
        <lane id="edge-inter0_0.nodeS-inter0_0_1" index="1" speed="16.67" length="292.35" width="3.00" shape="301.55,0.00 301.55,292.35"/>
    </edge>
    <edge id="edge-inter0_0.nodeW-inter0_0" from="inter0_0.nodeW" to="inter0_0" priority="-1" type="unitype">
        <lane id="edge-inter0_0.nodeW-inter0_0_0" index="0" speed="16.67" length="292.35" width="3.00" shape="0.00,295.35 292.35,295.35"/>
        <lane id="edge-inter0_0.nodeW-inter0_0_1" index="1" speed="16.67" length="292.35" width="3.00" shape="0.00,298.45 292.35,298.45"/>
    </edge>

    <tlLogic id="inter0_0" type="static" programID="0" offset="0">
        <phase duration="1000000" state="rrGGrrGG"/>
        <phase duration="4" state="yyyyyyyy"/>
        <phase duration="1000000" state="GGrrGGrr"/>
        <phase duration="4" state="yyyyyyyy"/>
    </tlLogic>

    <junction id="inter0_0" type="traffic_light" x="300.00" y="300.00" incLanes="edge-inter0_0.nodeN-inter0_0_0 edge-inter0_0.nodeN-inter0_0_1 edge-inter0_0.nodeE-inter0_0_0 edge-inter0_0.nodeE-inter0_0_1 edge-inter0_0.nodeS-inter0_0_0 edge-inter0_0.nodeS-inter0_0_1 edge-inter0_0.nodeW-inter0_0_0 edge-inter0_0.nodeW-inter0_0_1" intLanes=":inter0_0_0_0 :inter0_0_1_0 :inter0_0_2_0 :inter0_0_3_0 :inter0_0_4_0 :inter0_0_5_0 :inter0_0_6_0 :inter0_0_7_0" shape="293.85,307.65 306.15,307.65 307.65,306.15 307.65,293.85 306.15,292.35 293.85,292.35 292.35,293.85 292.35,306.15">
        <request index="0" response="00000000" foes="11100100" cont="0"/>
        <request index="1" response="00010000" foes="10011100" cont="0"/>
        <request index="2" response="00010011" foes="10010011" cont="0"/>
        <request index="3" response="01110010" foes="01110010" cont="0"/>
        <request index="4" response="00000000" foes="01001110" cont="0"/>
        <request index="5" response="00000001" foes="11001001" cont="0"/>
        <request index="6" response="00110001" foes="00111001" cont="0"/>
        <request index="7" response="00100111" foes="00100111" cont="0"/>
    </junction>
    <junction id="inter0_0.nodeE" type="dead_end" x="600.00" y="300.00" incLanes="edge-inter0_0-inter0_0.nodeE_0 edge-inter0_0-inter0_0.nodeE_1" intLanes="" shape="600.00,300.05 600.00,293.85 600.00,299.95"/>
    <junction id="inter0_0.nodeN" type="dead_end" x="300.00" y="600.00" incLanes="edge-inter0_0-inter0_0.nodeN_0 edge-inter0_0-inter0_0.nodeN_1" intLanes="" shape="299.95,600.00 306.15,600.00 300.05,600.00"/>
    <junction id="inter0_0.nodeS" type="dead_end" x="300.00" y="0.00" incLanes="edge-inter0_0-inter0_0.nodeS_0 edge-inter0_0-inter0_0.nodeS_1" intLanes="" shape="300.05,0.00 293.85,0.00 299.95,0.00"/>
    <junction id="inter0_0.nodeW" type="dead_end" x="0.00" y="300.00" incLanes="edge-inter0_0-inter0_0.nodeW_0 edge-inter0_0-inter0_0.nodeW_1" intLanes="" shape="0.00,299.95 0.00,306.15 0.00,300.05"/>

    <connection from="edge-inter0_0.nodeE-inter0_0" to="edge-inter0_0-inter0_0.nodeW" fromLane="0" toLane="0" via=":inter0_0_2_0" tl="inter0_0" linkIndex="2" dir="s" state="o"/>
    <connection from="edge-inter0_0.nodeE-inter0_0" to="edge-inter0_0-inter0_0.nodeS" fromLane="1" toLane="1" via=":inter0_0_3_0" tl="inter0_0" linkIndex="3" dir="l" state="o"/>
    <connection from="edge-inter0_0.nodeN-inter0_0" to="edge-inter0_0-inter0_0.nodeS" fromLane="0" toLane="0" via=":inter0_0_0_0" tl="inter0_0" linkIndex="0" dir="s" state="o"/>
    <connection from="edge-inter0_0.nodeN-inter0_0" to="edge-inter0_0-inter0_0.nodeE" fromLane="1" toLane="1" via=":inter0_0_1_0" tl="inter0_0" linkIndex="1" dir="l" state="o"/>
    <connection from="edge-inter0_0.nodeS-inter0_0" to="edge-inter0_0-inter0_0.nodeN" fromLane="0" toLane="0" via=":inter0_0_4_0" tl="inter0_0" linkIndex="4" dir="s" state="o"/>
    <connection from="edge-inter0_0.nodeS-inter0_0" to="edge-inter0_0-inter0_0.nodeW" fromLane="1" toLane="1" via=":inter0_0_5_0" tl="inter0_0" linkIndex="5" dir="l" state="o"/>
    <connection from="edge-inter0_0.nodeW-inter0_0" to="edge-inter0_0-inter0_0.nodeE" fromLane="0" toLane="0" via=":inter0_0_6_0" tl="inter0_0" linkIndex="6" dir="s" state="o"/>
    <connection from="edge-inter0_0.nodeW-inter0_0" to="edge-inter0_0-inter0_0.nodeN" fromLane="1" toLane="1" via=":inter0_0_7_0" tl="inter0_0" linkIndex="7" dir="l" state="o"/>

    <connection from=":inter0_0_0" to="edge-inter0_0-inter0_0.nodeS" fromLane="0" toLane="0" dir="s" state="M"/>
    <connection from=":inter0_0_1" to="edge-inter0_0-inter0_0.nodeE" fromLane="0" toLane="1" dir="l" state="M"/>
    <connection from=":inter0_0_2" to="edge-inter0_0-inter0_0.nodeW" fromLane="0" toLane="0" dir="s" state="M"/>
    <connection from=":inter0_0_3" to="edge-inter0_0-inter0_0.nodeS" fromLane="0" toLane="1" dir="l" state="M"/>
    <connection from=":inter0_0_4" to="edge-inter0_0-inter0_0.nodeN" fromLane="0" toLane="0" dir="s" state="M"/>
    <connection from=":inter0_0_5" to="edge-inter0_0-inter0_0.nodeW" fromLane="0" toLane="1" dir="l" state="M"/>
    <connection from=":inter0_0_6" to="edge-inter0_0-inter0_0.nodeE" fromLane="0" toLane="0" dir="s" state="M"/>
    <connection from=":inter0_0_7" to="edge-inter0_0-inter0_0.nodeN" fromLane="0" toLane="1" dir="l" state="M"/>

</net>
