# Supplementary material
Source: ML conference proceedings conference paper supplement (https://proceedings.neurips.cc/paper_files/paper/2021/hash/654516d1b4df6917094de807156adc14-Abstract.html)
Supplement: Supplementary file 1 [file 654516d1b4df6917094de807156adc14-Supplemental.zip › neurips-supplementary/codes/data/template_ls/1_1/cross.nod.xml]

<nodes>
<node id="inter0_0" x="300" y="300" type="traffic_light"/>
<node id="inter0_0.nodeN" x="300" y="600" type="priority"/>
<node id="inter0_0.nodeE" x="600" y="300" type="priority"/>
<node id="inter0_0.nodeS" x="300" y="0" type="priority"/>
<node id="inter0_0.nodeW" x="0" y="300" type="priority"/>
</nodes>
