# Supplementary material
Source: ML conference proceedings conference paper supplement (https://proceedings.neurips.cc/paper_files/paper/2021/hash/654516d1b4df6917094de807156adc14-Abstract.html)
Supplement: Supplementary file 1 [file 654516d1b4df6917094de807156adc14-Supplemental.zip › neurips-supplementary/codes/data/template_ls/1_1/cross.typ.xml]

<?xml version="1.0" encoding="UTF-8"?>
<types>
    <type id="unitype" speed="16.67"/>
</types>
