# Supplementary material
Source: ML conference proceedings conference paper supplement (https://proceedings.neurips.cc/paper_files/paper/2021/hash/654516d1b4df6917094de807156adc14-Abstract.html)
Supplement: Supplementary file 1 [file 654516d1b4df6917094de807156adc14-Supplemental.zip › neurips-supplementary/codes/data/template_ls/1_1/roadnet_1_1.json]

{
  "intersections": [
    {
      "id": "intersection_0_1",
      "point": {
        "x": -300,
        "y": 0
      },
      "width": 0,
      "roads": [
        "road_1_1_2",
        "road_0_1_0"
      ],
      "roadLinks": [],
      "trafficLight": {
        "roadLinkIndices": [],
        "lightphases": [
          {
            "time": 5,
            "availableRoadLinks": []
          },
          {
            "time": 30,
            "availableRoadLinks": []
          },
          {
            "time": 30,
            "availableRoadLinks": []
          },
          {
            "time": 30,
            "availableRoadLinks": []
          },
          {
            "time": 30,
            "availableRoadLinks": []
          },
          {
            "time": 30,
            "availableRoadLinks": []
          },
          {
            "time": 30,
            "availableRoadLinks": []
          },
          {
            "time": 30,
            "availableRoadLinks": []
          },
          {
            "time": 30,
            "availableRoadLinks": []
          }
        ]
      },
      "virtual": true
    },
    {
      "id": "intersection_1_0",
      "point": {
        "x": 0,
        "y": -300
      },
      "width": 0,
      "roads": [
        "road_1_1_3",
        "road_1_0_1"
      ],
      "roadLinks": [],
      "trafficLight": {
        "roadLinkIndices": [],
        "lightphases": [
          {
            "time": 5,
            "availableRoadLinks": []
          },
          {
            "time": 30,
            "availableRoadLinks": []
          },
          {
            "time": 30,
            "availableRoadLinks": []
          },
          {
            "time": 30,
            "availableRoadLinks": []
          },
          {
            "time": 30,
            "availableRoadLinks": []
          },
          {
            "time": 30,
            "availableRoadLinks": []
          },
          {
            "time": 30,
            "availableRoadLinks": []
          },
          {
            "time": 30,
            "availableRoadLinks": []
          },
          {
            "time": 30,
            "availableRoadLinks": []
          }
        ]
      },
      "virtual": true
    },
    {
      "id": "intersection_1_1",
      "point": {
        "x": 0,
        "y": 0
      },
      "width": 8,
      "roads": [
        "road_0_1_0",
        "road_1_0_1",
        "road_2_1_2",
        "road_1_2_3",
        "road_1_1_0",
        "road_1_1_1",
        "road_1_1_2",
        "road_1_1_3"
      ],
      "roadLinks": [
        {
          "type": "go_straight",
          "startRoad": "road_0_1_0",
          "endRoad": "road_1_1_0",
          "direction": 0,
          "laneLinks": [
            {
              "startLaneIndex": 1,
              "endLaneIndex": 0,
              "points": [
                {
                  "x": -8.0,
                  "y": -4.5
                },
                {
                  "x": -2.666666666666667,
                  "y": -4.5
                },
                {
                  "x": 2.666666666666667,
                  "y": -1.5
                },
                {
                  "x": 8.0,
                  "y": -1.5
                }
              ]
            },
            {
              "startLaneIndex": 1,
              "endLaneIndex": 1,
              "points": [
                {
                  "x": -8.0,
                  "y": -4.5
                },
                {
                  "x": -2.666666666666667,
                  "y": -4.5
                },
                {
                  "x": 2.666666666666667,
                  "y": -4.5
                },
                {
                  "x": 8.0,
                  "y": -4.5
                }
              ]
            }
          ]
        },
        {
          "type": "turn_left",
          "startRoad": "road_0_1_0",
          "endRoad": "road_1_1_1",
          "direction": 0,
          "laneLinks": [
            {
              "startLaneIndex": 0,
              "endLaneIndex": 0,
              "points": [
                {
                  "x": -8.0,
                  "y": -1.5
                },
                {
                  "x": -4.833333333333334,
                  "y": -1.5
                },
                {
                  "x": 1.5,
                  "y": 4.833333333333334
                },
                {
                  "x": 1.5,
                  "y": 8.0
                }
              ]
            },
            {
              "startLaneIndex": 0,
              "endLaneIndex": 1,
              "points": [
                {
                  "x": -8.0,
                  "y": -1.5
                },
                {
                  "x": -3.833333333333333,
                  "y": -1.5
                },
                {
                  "x": 4.5,
                  "y": 3.833333333333333
                },
                {
                  "x": 4.5,
                  "y": 8.0
                }
              ]
            }
          ]
        },
        {
          "type": "go_straight",
          "startRoad": "road_1_0_1",
          "endRoad": "road_1_1_1",
          "direction": 1,
          "laneLinks": [
            {
              "startLaneIndex": 1,
              "endLaneIndex": 0,
              "points": [
                {
                  "x": 4.5,
                  "y": -8.0
                },
                {
                  "x": 4.5,
                  "y": -2.666666666666667
                },
                {
                  "x": 1.5,
                  "y": 2.666666666666667
                },
                {
                  "x": 1.5,
                  "y": 8.0
                }
              ]
            },
            {
              "startLaneIndex": 1,
              "endLaneIndex": 1,
              "points": [
                {
                  "x": 4.5,
                  "y": -8.0
                },
                {
                  "x": 4.5,
                  "y": -2.666666666666667
                },
                {
                  "x": 4.5,
                  "y": 2.666666666666667
                },
                {
                  "x": 4.5,
                  "y": 8.0
                }
              ]
            }
          ]
        },
        {
          "type": "turn_left",
          "startRoad": "road_1_0_1",
          "endRoad": "road_1_1_2",
          "direction": 1,
          "laneLinks": [
            {
              "startLaneIndex": 0,
              "endLaneIndex": 0,
              "points": [
                {
                  "x": 1.5,
                  "y": -8.0
                },
                {
                  "x": 1.5,
                  "y": -4.833333333333334
                },
                {
                  "x": -4.833333333333334,
                  "y": 1.5
                },
                {
                  "x": -8.0,
                  "y": 1.5
                }
              ]
            },
            {
              "startLaneIndex": 0,
              "endLaneIndex": 1,
              "points": [
                {
                  "x": 1.5,
                  "y": -8.0
                },
                {
                  "x": 1.5,
                  "y": -3.833333333333333
                },
                {
                  "x": -3.833333333333333,
                  "y": 4.5
                },
                {
                  "x": -8.0,
                  "y": 4.5
                }
              ]
            }
          ]
        },
        {
          "type": "go_straight",
          "startRoad": "road_2_1_2",
          "endRoad": "road_1_1_2",
          "direction": 2,
          "laneLinks": [
            {
              "startLaneIndex": 1,
              "endLaneIndex": 0,
              "points": [
                {
                  "x": 8.0,
                  "y": 4.5
                },
                {
                  "x": 2.666666666666667,
                  "y": 4.5
                },
                {
                  "x": -2.666666666666667,
                  "y": 1.5
                },
                {
                  "x": -8.0,
                  "y": 1.5
                }
              ]
            },
            {
              "startLaneIndex": 1,
              "endLaneIndex": 1,
              "points": [
                {
                  "x": 8.0,
                  "y": 4.5
                },
                {
                  "x": 2.666666666666667,
                  "y": 4.5
                },
                {
                  "x": -2.666666666666667,
                  "y": 4.5
                },
                {
                  "x": -8.0,
                  "y": 4.5
                }
              ]
            }
          ]
        },
        {
          "type": "turn_left",
          "startRoad": "road_2_1_2",
          "endRoad": "road_1_1_3",
          "direction": 2,
          "laneLinks": [
            {
              "startLaneIndex": 0,
              "endLaneIndex": 0,
              "points": [
                {
                  "x": 8.0,
                  "y": 1.5
                },
                {
                  "x": 4.833333333333334,
                  "y": 1.5
                },
                {
                  "x": -1.5,
                  "y": -4.833333333333334
                },
                {
                  "x": -1.5,
                  "y": -8.0
                }
              ]
            },
            {
              "startLaneIndex": 0,
              "endLaneIndex": 1,
              "points": [
                {
                  "x": 8.0,
                  "y": 1.5
                },
                {
                  "x": 3.833333333333333,
                  "y": 1.5
                },
                {
                  "x": -4.5,
                  "y": -3.833333333333333
                },
                {
                  "x": -4.5,
                  "y": -8.0
                }
              ]
            }
          ]
        },
        {
          "type": "turn_left",
          "startRoad": "road_1_2_3",
          "endRoad": "road_1_1_0",
          "direction": 3,
          "laneLinks": [
            {
              "startLaneIndex": 0,
              "endLaneIndex": 0,
              "points": [
                {
                  "x": -1.5,
                  "y": 8.0
                },
                {
                  "x": -1.5,
                  "y": 4.833333333333334
                },
                {
                  "x": 4.833333333333334,
                  "y": -1.5
                },
                {
                  "x": 8.0,
                  "y": -1.5
                }
              ]
            },
            {
              "startLaneIndex": 0,
              "endLaneIndex": 1,
              "points": [
                {
                  "x": -1.5,
                  "y": 8.0
                },
                {
                  "x": -1.5,
                  "y": 3.833333333333333
                },
                {
                  "x": 3.833333333333333,
                  "y": -4.5
                },
                {
                  "x": 8.0,
                  "y": -4.5
                }
              ]
            }
          ]
        },
        {
          "type": "go_straight",
          "startRoad": "road_1_2_3",
          "endRoad": "road_1_1_3",
          "direction": 3,
          "laneLinks": [
            {
              "startLaneIndex": 1,
              "endLaneIndex": 0,
              "points": [
                {
                  "x": -4.5,
                  "y": 8.0
                },
                {
                  "x": -4.5,
                  "y": 2.666666666666667
                },
                {
                  "x": -1.5,
                  "y": -2.666666666666667
                },
                {
                  "x": -1.5,
                  "y": -8.0
                }
              ]
            },
            {
              "startLaneIndex": 1,
              "endLaneIndex": 1,
              "points": [
                {
                  "x": -4.5,
                  "y": 8.0
                },
                {
                  "x": -4.5,
                  "y": 2.666666666666667
                },
                {
                  "x": -4.5,
                  "y": -2.666666666666667
                },
                {
                  "x": -4.5,
                  "y": -8.0
                }
              ]
            }
          ]
        }
      ],
      "trafficLight": {
        "roadLinkIndices": [
          0,
          1,
          2,
          3,
          4,
          5,
          6,
          7
        ],
        "lightphases": [
          {
            "time": 5,
            "availableRoadLinks": []
          },
          {
            "time": 30,
            "availableRoadLinks": [
              0,
              4
            ]
          },
          {
            "time": 30,
            "availableRoadLinks": [
              2,
              7
            ]
          },
          {
            "time": 30,
            "availableRoadLinks": [
              1,
              5
            ]
          },
          {
            "time": 30,
            "availableRoadLinks": [
              3,
              6
            ]
          },
          {
            "time": 30,
            "availableRoadLinks": [
              0,
              1
            ]
          },
          {
            "time": 30,
            "availableRoadLinks": [
              4,
              5
            ]
          },
          {
            "time": 30,
            "availableRoadLinks": [
              2,
              3
            ]
          },
          {
            "time": 30,
            "availableRoadLinks": [
              6,
              7
            ]
          }
        ]
      },
      "virtual": false
    },
    {
      "id": "intersection_1_2",
      "point": {
        "x": 0,
        "y": 300
      },
      "width": 0,
      "roads": [
        "road_1_1_1",
        "road_1_2_3"
      ],
      "roadLinks": [],
      "trafficLight": {
        "roadLinkIndices": [],
        "lightphases": [
          {
            "time": 5,
            "availableRoadLinks": []
          },
          {
            "time": 30,
            "availableRoadLinks": []
          },
          {
            "time": 30,
            "availableRoadLinks": []
          },
          {
            "time": 30,
            "availableRoadLinks": []
          },
          {
            "time": 30,
            "availableRoadLinks": []
          },
          {
            "time": 30,
            "availableRoadLinks": []
          },
          {
            "time": 30,
            "availableRoadLinks": []
          },
          {
            "time": 30,
            "availableRoadLinks": []
          },
          {
            "time": 30,
            "availableRoadLinks": []
          }
        ]
      },
      "virtual": true
    },
    {
      "id": "intersection_2_1",
      "point": {
        "x": 300,
        "y": 0
      },
      "width": 0,
      "roads": [
        "road_1_1_0",
        "road_2_1_2"
      ],
      "roadLinks": [],
      "trafficLight": {
        "roadLinkIndices": [],
        "lightphases": [
          {
            "time": 5,
            "availableRoadLinks": []
          },
          {
            "time": 30,
            "availableRoadLinks": []
          },
          {
            "time": 30,
            "availableRoadLinks": []
          },
          {
            "time": 30,
            "availableRoadLinks": []
          },
          {
            "time": 30,
            "availableRoadLinks": []
          },
          {
            "time": 30,
            "availableRoadLinks": []
          },
          {
            "time": 30,
            "availableRoadLinks": []
          },
          {
            "time": 30,
            "availableRoadLinks": []
          },
          {
            "time": 30,
            "availableRoadLinks": []
          }
        ]
      },
      "virtual": true
    }
  ],
  "roads": [
    {
      "id": "road_0_1_0",
      "points": [
        {
          "x": -300,
          "y": 0
        },
        {
          "x": 0,
          "y": 0
        }
      ],
      "lanes": [
        {
          "width": 3,
          "maxSpeed": 16.67
        },
        {
          "width": 3,
          "maxSpeed": 16.67
        }
      ],
      "startIntersection": "intersection_0_1",
      "endIntersection": "intersection_1_1"
    },
    {
      "id": "road_1_0_1",
      "points": [
        {
          "x": 0,
          "y": -300
        },
        {
          "x": 0,
          "y": 0
        }
      ],
      "lanes": [
        {
          "width": 3,
          "maxSpeed": 16.67
        },
        {
          "width": 3,
          "maxSpeed": 16.67
        }
      ],
      "startIntersection": "intersection_1_0",
      "endIntersection": "intersection_1_1"
    },
    {
      "id": "road_1_1_0",
      "points": [
        {
          "x": 0,
          "y": 0
        },
        {
          "x": 300,
          "y": 0
        }
      ],
      "lanes": [
        {
          "width": 3,
          "maxSpeed": 16.67
        },
        {
          "width": 3,
          "maxSpeed": 16.67
        }
      ],
      "startIntersection": "intersection_1_1",
      "endIntersection": "intersection_2_1"
    },
    {
      "id": "road_1_1_1",
      "points": [
        {
          "x": 0,
          "y": 0
        },
        {
          "x": 0,
          "y": 300
        }
      ],
      "lanes": [
        {
          "width": 3,
          "maxSpeed": 16.67
        },
        {
          "width": 3,
          "maxSpeed": 16.67
        }
      ],
      "startIntersection": "intersection_1_1",
      "endIntersection": "intersection_1_2"
    },
    {
      "id": "road_1_1_2",
      "points": [
        {
          "x": 0,
          "y": 0
        },
        {
          "x": -300,
          "y": 0
        }
      ],
      "lanes": [
        {
          "width": 3,
          "maxSpeed": 16.67
        },
        {
          "width": 3,
          "maxSpeed": 16.67
        }
      ],
      "startIntersection": "intersection_1_1",
      "endIntersection": "intersection_0_1"
    },
    {
      "id": "road_1_1_3",
      "points": [
        {
          "x": 0,
          "y": 0
        },
        {
          "x": 0,
          "y": -300
        }
      ],
      "lanes": [
        {
          "width": 3,
          "maxSpeed": 16.67
        },
        {
          "width": 3,
          "maxSpeed": 16.67
        }
      ],
      "startIntersection": "intersection_1_1",
      "endIntersection": "intersection_1_0"
    },
    {
      "id": "road_1_2_3",
      "points": [
        {
          "x": 0,
          "y": 300
        },
        {
          "x": 0,
          "y": 0
        }
      ],
      "lanes": [
        {
          "width": 3,
          "maxSpeed": 16.67
        },
        {
          "width": 3,
          "maxSpeed": 16.67
        }
      ],
      "startIntersection": "intersection_1_2",
      "endIntersection": "intersection_1_1"
    },
    {
      "id": "road_2_1_2",
      "points": [
        {
          "x": 300,
          "y": 0
        },
        {
          "x": 0,
          "y": 0
        }
      ],
      "lanes": [
        {
          "width": 3,
          "maxSpeed": 16.67
        },
        {
          "width": 3,
          "maxSpeed": 16.67
        }
      ],
      "startIntersection": "intersection_2_1",
      "endIntersection": "intersection_1_1"
    }
  ]
}
