# Supplementary material
Source: ML conference proceedings conference paper supplement (https://proceedings.neurips.cc/paper_files/paper/2021/hash/654516d1b4df6917094de807156adc14-Abstract.html)
Supplement: Supplementary file 1 [file 654516d1b4df6917094de807156adc14-Supplemental.zip › neurips-supplementary/codes/data/template_ls/1_2/cross.car.type.xml]

<additional> 
    <vType id="Car" accel="2.0" decel="4.5" sigma="0" tau="1.5" length="5" minGap="2.5" maxSpeed="11.111" guiShape="passenger"/>


     <route id="route1" edges="edge-left-0 edge-0-1 edge-1-right"/> 
    <route id="route2" edges="edge-right-1 edge-1-0 edge-0-left"/> 
    <route id="route3" edges="edge-up-0 edge-0-down"/>
     <route id="route4" edges="edge-down-0 edge-0-up"/> 
    <route id="route5" edges="edge-up-1 edge-1-down"/>
     <route id="route6" edges="edge-down-1 edge-1-up"/> 
</additional>
