# Supplementary material
Source: ML conference proceedings conference paper supplement (https://proceedings.neurips.cc/paper_files/paper/2021/hash/654516d1b4df6917094de807156adc14-Abstract.html)
Supplement: Supplementary file 1 [file 654516d1b4df6917094de807156adc14-Supplemental.zip › neurips-supplementary/codes/data/template_ls/1_2/cross.edg.xml]

<?xml version="1.0" encoding="UTF-8"?>
<edges xmlns:xsi="http://www.w3.org/2001/XMLSchema-instance" xsi:noNamespaceSchemaLocation="
http://sumo.dlr.de/xsd/edges_file.xsd">

   <edge id="edge-left-0" from="left" to="node0" numLanes="3" width="3" type="go_in_to_junction" />
   <edge id="edge-0-left" from="node0" to="left" numLanes="3" width="3" type="go_in_to_junction" />

   <edge id="edge-0-1" from="node0" to="node1" numLanes="3" width="3" type="go_in_to_junction" />   
   <edge id="edge-1-0" from="node1" to="node0" numLanes="3" width="3" type="go_in_to_junction" />

   <edge id="edge-up-0" from="node0_up" to="node0" numLanes="3" width="3" type="go_in_to_junction" />
   <edge id="edge-0-up" from="node0" to="node0_up" numLanes="3" width="3" type="go_in_to_junction" />

   <edge id="edge-down-0" from="node0_down" to="node0" numLanes="3" width="3" type="go_in_to_junction" />
   <edge id="edge-0-down" from="node0" to="node0_down" numLanes="3" width="3" type="go_in_to_junction" />


   <edge id="edge-up-1" from="node1_up" to="node1" numLanes="3" width="3" type="go_in_to_junction" />
   <edge id="edge-1-up" from="node1" to="node1_up" numLanes="3" width="3" type="go_in_to_junction" />

   <edge id="edge-down-1" from="node1_down" to="node1" numLanes="3" width="3" type="go_in_to_junction" />
   <edge id="edge-1-down" from="node1" to="node1_down" numLanes="3" width="3" type="go_in_to_junction" />


   <edge id="edge-right-1" from="right" to="node1" numLanes="3" width="3" type="go_in_to_junction" />
   <edge id="edge-1-right" from="node1" to="right" numLanes="3" width="3" type="go_in_to_junction" />


</edges>
