# Supplementary material
Source: ML conference proceedings conference paper supplement (https://proceedings.neurips.cc/paper_files/paper/2021/hash/654516d1b4df6917094de807156adc14-Abstract.html)
Supplement: Supplementary file 1 [file 654516d1b4df6917094de807156adc14-Supplemental.zip › neurips-supplementary/codes/data/template_ls/1_2/cross.nod.xml]

<?xml version="1.0" encoding="UTF-8"?>
<nodes xmlns:xsi="http://www.w3.org/2001/XMLSchema-instance" xsi:noNamespaceSchemaLocation="http://sumo.dlr.de/xsd/nodes_file.xsd">
      <node id="node0" x="-150.0" y="0.0"  type="traffic_light"/>
      <node id="node1" x="150.0" y="0.0"  type="traffic_light"/>

   <node id="left" x="-450.0" y="0.0" type="priority"/>
   <node id="right" x="450.0" y="0.0" type="priority"/>
   
   <node id="node0_up" x="-150.0" y="300.0" type="priority"/>
   <node id="node0_down" x="-150.0" y="-300.0" type="priority"/>
   <node id="node0_up_end" x="-150.0" y="-310.0" type="priority"/>
   <node id="node0_down_end" x="-150.0" y="+310.0" type="priority"/>

   <node id="node1_up" x="150.0" y="300.0" type="priority"/>
   <node id="node1_down" x="150.0" y="-300.0" type="priority"/>
   <node id="node1_up_end" x="150.0" y="-310.0" type="priority"/>
   <node id="node1_down_end" x="150.0" y="+310.0" type="priority"/>

</nodes>
