# Supplementary material
Source: ML conference proceedings conference paper supplement (https://proceedings.neurips.cc/paper_files/paper/2021/hash/654516d1b4df6917094de807156adc14-Abstract.html)
Supplement: Supplementary file 1 [file 654516d1b4df6917094de807156adc14-Supplemental.zip › neurips-supplementary/codes/data/template_ls/3_3/roadnet_3_3.json]

{
  "intersections": [
    {
      "id": "intersection_0_1",
      "point": {
        "x": -300,
        "y": 0
      },
      "width": 0,
      "roads": [
        "road_1_1_2",
        "road_0_1_0"
      ],
      "roadLinks": [],
      "trafficLight": {
        "roadLinkIndices": [],
        "lightphases": [
          {
            "time": 5,
            "availableRoadLinks": []
          },
          {
            "time": 30,
            "availableRoadLinks": []
          },
          {
            "time": 30,
            "availableRoadLinks": []
          },
          {
            "time": 30,
            "availableRoadLinks": []
          },
          {
            "time": 30,
            "availableRoadLinks": []
          },
          {
            "time": 30,
            "availableRoadLinks": []
          },
          {
            "time": 30,
            "availableRoadLinks": []
          },
          {
            "time": 30,
            "availableRoadLinks": []
          },
          {
            "time": 30,
            "availableRoadLinks": []
          }
        ]
      },
      "virtual": true
    },
    {
      "id": "intersection_0_2",
      "point": {
        "x": -300,
        "y": 300
      },
      "width": 0,
      "roads": [
        "road_1_2_2",
        "road_0_2_0"
      ],
      "roadLinks": [],
      "trafficLight": {
        "roadLinkIndices": [],
        "lightphases": [
          {
            "time": 5,
            "availableRoadLinks": []
          },
          {
            "time": 30,
            "availableRoadLinks": []
          },
          {
            "time": 30,
            "availableRoadLinks": []
          },
          {
            "time": 30,
            "availableRoadLinks": []
          },
          {
            "time": 30,
            "availableRoadLinks": []
          },
          {
            "time": 30,
            "availableRoadLinks": []
          },
          {
            "time": 30,
            "availableRoadLinks": []
          },
          {
            "time": 30,
            "availableRoadLinks": []
          },
          {
            "time": 30,
            "availableRoadLinks": []
          }
        ]
      },
      "virtual": true
    },
    {
      "id": "intersection_0_3",
      "point": {
        "x": -300,
        "y": 600
      },
      "width": 0,
      "roads": [
        "road_1_3_2",
        "road_0_3_0"
      ],
      "roadLinks": [],
      "trafficLight": {
        "roadLinkIndices": [],
        "lightphases": [
          {
            "time": 5,
            "availableRoadLinks": []
          },
          {
            "time": 30,
            "availableRoadLinks": []
          },
          {
            "time": 30,
            "availableRoadLinks": []
          },
          {
            "time": 30,
            "availableRoadLinks": []
          },
          {
            "time": 30,
            "availableRoadLinks": []
          },
          {
            "time": 30,
            "availableRoadLinks": []
          },
          {
            "time": 30,
            "availableRoadLinks": []
          },
          {
            "time": 30,
            "availableRoadLinks": []
          },
          {
            "time": 30,
            "availableRoadLinks": []
          }
        ]
      },
      "virtual": true
    },
    {
      "id": "intersection_1_0",
      "point": {
        "x": 0,
        "y": -300
      },
      "width": 0,
      "roads": [
        "road_1_1_3",
        "road_1_0_1"
      ],
      "roadLinks": [],
      "trafficLight": {
        "roadLinkIndices": [],
        "lightphases": [
          {
            "time": 5,
            "availableRoadLinks": []
          },
          {
            "time": 30,
            "availableRoadLinks": []
          },
          {
            "time": 30,
            "availableRoadLinks": []
          },
          {
            "time": 30,
            "availableRoadLinks": []
          },
          {
            "time": 30,
            "availableRoadLinks": []
          },
          {
            "time": 30,
            "availableRoadLinks": []
          },
          {
            "time": 30,
            "availableRoadLinks": []
          },
          {
            "time": 30,
            "availableRoadLinks": []
          },
          {
            "time": 30,
            "availableRoadLinks": []
          }
        ]
      },
      "virtual": true
    },
    {
      "id": "intersection_1_1",
      "point": {
        "x": 0,
        "y": 0
      },
      "width": 5,
      "roads": [
        "road_0_1_0",
        "road_1_0_1",
        "road_2_1_2",
        "road_1_2_3",
        "road_1_1_0",
        "road_1_1_1",
        "road_1_1_2",
        "road_1_1_3"
      ],
      "roadLinks": [
        {
          "type": "go_straight",
          "startRoad": "road_0_1_0",
          "endRoad": "road_1_1_0",
          "direction": 0,
          "laneLinks": [
            {
              "startLaneIndex": 1,
              "endLaneIndex": 0,
              "points": [
                {
                  "x": -5.0,
                  "y": -4.5
                },
                {
                  "x": -4.36,
                  "y": -4.416
                },
                {
                  "x": -3.48,
                  "y": -4.188
                },
                {
                  "x": -2.42,
                  "y": -3.852
                },
                {
                  "x": -1.24,
                  "y": -3.444
                },
                {
                  "x": 0.0,
                  "y": -3.0
                },
                {
                  "x": 1.24,
                  "y": -2.556
                },
                {
                  "x": 2.42,
                  "y": -2.148
                },
                {
                  "x": 3.48,
                  "y": -1.811999999999999
                },
                {
                  "x": 4.36,
                  "y": -1.584
                },
                {
                  "x": 5.0,
                  "y": -1.5
                }
              ]
            },
            {
              "startLaneIndex": 1,
              "endLaneIndex": 1,
              "points": [
                {
                  "x": -5.0,
                  "y": -4.5
                },
                {
                  "x": -4.36,
                  "y": -4.5
                },
                {
                  "x": -3.48,
                  "y": -4.5
                },
                {
                  "x": -2.42,
                  "y": -4.5
                },
                {
                  "x": -1.24,
                  "y": -4.5
                },
                {
                  "x": 0.0,
                  "y": -4.5
                },
                {
                  "x": 1.24,
                  "y": -4.5
                },
                {
                  "x": 2.42,
                  "y": -4.5
                },
                {
                  "x": 3.48,
                  "y": -4.499999999999999
                },
                {
                  "x": 4.36,
                  "y": -4.5
                },
                {
                  "x": 5.0,
                  "y": -4.5
                }
              ]
            },
            {
              "startLaneIndex": 1,
              "endLaneIndex": 2,
              "points": [
                {
                  "x": -5.0,
                  "y": -4.5
                },
                {
                  "x": -4.36,
                  "y": -4.584
                },
                {
                  "x": -3.48,
                  "y": -4.812
                },
                {
                  "x": -2.42,
                  "y": -5.148
                },
                {
                  "x": -1.24,
                  "y": -5.556
                },
                {
                  "x": 0.0,
                  "y": -6.0
                },
                {
                  "x": 1.24,
                  "y": -6.444
                },
                {
                  "x": 2.42,
                  "y": -6.852
                },
                {
                  "x": 3.48,
                  "y": -7.187999999999999
                },
                {
                  "x": 4.36,
                  "y": -7.416
                },
                {
                  "x": 5.0,
                  "y": -7.5
                }
              ]
            },
            {
              "startLaneIndex": 2,
              "endLaneIndex": 0,
              "points": [
                {
                  "x": -5.0,
                  "y": -7.5
                },
                {
                  "x": -4.36,
                  "y": -7.332
                },
                {
                  "x": -3.48,
                  "y": -6.876
                },
                {
                  "x": -2.42,
                  "y": -6.204
                },
                {
                  "x": -1.24,
                  "y": -5.388
                },
                {
                  "x": 0.0,
                  "y": -4.5
                },
                {
                  "x": 1.24,
                  "y": -3.612
                },
                {
                  "x": 2.42,
                  "y": -2.796
                },
                {
                  "x": 3.48,
                  "y": -2.124
                },
                {
                  "x": 4.36,
                  "y": -1.668
                },
                {
                  "x": 5.0,
                  "y": -1.5
                }
              ]
            },
            {
              "startLaneIndex": 2,
              "endLaneIndex": 1,
              "points": [
                {
                  "x": -5.0,
                  "y": -7.5
                },
                {
                  "x": -4.36,
                  "y": -7.416
                },
                {
                  "x": -3.48,
                  "y": -7.188
                },
                {
                  "x": -2.42,
                  "y": -6.852
                },
                {
                  "x": -1.24,
                  "y": -6.444
                },
                {
                  "x": 0.0,
                  "y": -6.0
                },
                {
                  "x": 1.24,
                  "y": -5.556
                },
                {
                  "x": 2.42,
                  "y": -5.148
                },
                {
                  "x": 3.48,
                  "y": -4.812
                },
                {
                  "x": 4.36,
                  "y": -4.584
                },
                {
                  "x": 5.0,
                  "y": -4.5
                }
              ]
            },
            {
              "startLaneIndex": 2,
              "endLaneIndex": 2,
              "points": [
                {
                  "x": -5.0,
                  "y": -7.5
                },
                {
                  "x": -4.36,
                  "y": -7.5
                },
                {
                  "x": -3.48,
                  "y": -7.5
                },
                {
                  "x": -2.42,
                  "y": -7.5
                },
                {
                  "x": -1.24,
                  "y": -7.5
                },
                {
                  "x": 0.0,
                  "y": -7.5
                },
                {
                  "x": 1.24,
                  "y": -7.5
                },
                {
                  "x": 2.42,
                  "y": -7.5
                },
                {
                  "x": 3.48,
                  "y": -7.5
                },
                {
                  "x": 4.36,
                  "y": -7.5
                },
                {
                  "x": 5.0,
                  "y": -7.5
                }
              ]
            }
          ]
        },
        {
          "type": "turn_left",
          "startRoad": "road_0_1_0",
          "endRoad": "road_1_1_1",
          "direction": 0,
          "laneLinks": [
            {
              "startLaneIndex": 0,
              "endLaneIndex": 0,
              "points": [
                {
                  "x": -5.0,
                  "y": -1.5
                },
                {
                  "x": -4.413,
                  "y": -1.363
                },
                {
                  "x": -3.684,
                  "y": -0.984
                },
                {
                  "x": -2.8609999999999998,
                  "y": -0.411
                },
                {
                  "x": -1.992,
                  "y": 0.308
                },
                {
                  "x": -1.125,
                  "y": 1.125
                },
                {
                  "x": -0.308,
                  "y": 1.992
                },
                {
                  "x": 0.411,
                  "y": 2.8609999999999998
                },
                {
                  "x": 0.984,
                  "y": 3.684
                },
                {
                  "x": 1.363,
                  "y": 4.413
                },
                {
                  "x": 1.5,
                  "y": 5.0
                }
              ]
            },
            {
              "startLaneIndex": 0,
              "endLaneIndex": 1,
              "points": [
                {
                  "x": -5.0,
                  "y": -1.5
                },
                {
                  "x": -4.329,
                  "y": -1.363
                },
                {
                  "x": -3.372,
                  "y": -0.984
                },
                {
                  "x": -2.213,
                  "y": -0.411
                },
                {
                  "x": -0.9359999999999999,
                  "y": 0.308
                },
                {
                  "x": 0.375,
                  "y": 1.125
                },
                {
                  "x": 1.636,
                  "y": 1.992
                },
                {
                  "x": 2.763,
                  "y": 2.8609999999999998
                },
                {
                  "x": 3.672,
                  "y": 3.684
                },
                {
                  "x": 4.279,
                  "y": 4.413
                },
                {
                  "x": 4.5,
                  "y": 5.0
                }
              ]
            },
            {
              "startLaneIndex": 0,
              "endLaneIndex": 2,
              "points": [
                {
                  "x": -5.0,
                  "y": -1.5
                },
                {
                  "x": -4.245,
                  "y": -1.363
                },
                {
                  "x": -3.06,
                  "y": -0.984
                },
                {
                  "x": -1.565,
                  "y": -0.411
                },
                {
                  "x": 0.12,
                  "y": 0.308
                },
                {
                  "x": 1.875,
                  "y": 1.125
                },
                {
                  "x": 3.58,
                  "y": 1.992
                },
                {
                  "x": 5.115,
                  "y": 2.8609999999999998
                },
                {
                  "x": 6.36,
                  "y": 3.684
                },
                {
                  "x": 7.195,
                  "y": 4.413
                },
                {
                  "x": 7.5,
                  "y": 5.0
                }
              ]
            }
          ]
        },
        {
          "type": "go_straight",
          "startRoad": "road_1_0_1",
          "endRoad": "road_1_1_1",
          "direction": 1,
          "laneLinks": [
            {
              "startLaneIndex": 1,
              "endLaneIndex": 0,
              "points": [
                {
                  "x": 4.5,
                  "y": -5.0
                },
                {
                  "x": 4.416,
                  "y": -4.36
                },
                {
                  "x": 4.188,
                  "y": -3.48
                },
                {
                  "x": 3.852,
                  "y": -2.42
                },
                {
                  "x": 3.444,
                  "y": -1.24
                },
                {
                  "x": 3.0,
                  "y": 0.0
                },
                {
                  "x": 2.556,
                  "y": 1.24
                },
                {
                  "x": 2.148,
                  "y": 2.42
                },
                {
                  "x": 1.811999999999999,
                  "y": 3.48
                },
                {
                  "x": 1.584,
                  "y": 4.36
                },
                {
                  "x": 1.5,
                  "y": 5.0
                }
              ]
            },
            {
              "startLaneIndex": 1,
              "endLaneIndex": 1,
              "points": [
                {
                  "x": 4.5,
                  "y": -5.0
                },
                {
                  "x": 4.5,
                  "y": -4.36
                },
                {
                  "x": 4.5,
                  "y": -3.48
                },
                {
                  "x": 4.5,
                  "y": -2.42
                },
                {
                  "x": 4.5,
                  "y": -1.24
                },
                {
                  "x": 4.5,
                  "y": 0.0
                },
                {
                  "x": 4.5,
                  "y": 1.24
                },
                {
                  "x": 4.5,
                  "y": 2.42
                },
                {
                  "x": 4.499999999999999,
                  "y": 3.48
                },
                {
                  "x": 4.5,
                  "y": 4.36
                },
                {
                  "x": 4.5,
                  "y": 5.0
                }
              ]
            },
            {
              "startLaneIndex": 1,
              "endLaneIndex": 2,
              "points": [
                {
                  "x": 4.5,
                  "y": -5.0
                },
                {
                  "x": 4.584,
                  "y": -4.36
                },
                {
                  "x": 4.812,
                  "y": -3.48
                },
                {
                  "x": 5.148,
                  "y": -2.42
                },
                {
                  "x": 5.556,
                  "y": -1.24
                },
                {
                  "x": 6.0,
                  "y": 0.0
                },
                {
                  "x": 6.444,
                  "y": 1.24
                },
                {
                  "x": 6.852,
                  "y": 2.42
                },
                {
                  "x": 7.187999999999999,
                  "y": 3.48
                },
                {
                  "x": 7.416,
                  "y": 4.36
                },
                {
                  "x": 7.5,
                  "y": 5.0
                }
              ]
            },
            {
              "startLaneIndex": 2,
              "endLaneIndex": 0,
              "points": [
                {
                  "x": 7.5,
                  "y": -5.0
                },
                {
                  "x": 7.332,
                  "y": -4.36
                },
                {
                  "x": 6.876,
                  "y": -3.48
                },
                {
                  "x": 6.204,
                  "y": -2.42
                },
                {
                  "x": 5.388,
                  "y": -1.24
                },
                {
                  "x": 4.5,
                  "y": 0.0
                },
                {
                  "x": 3.612,
                  "y": 1.24
                },
                {
                  "x": 2.796,
                  "y": 2.42
                },
                {
                  "x": 2.124,
                  "y": 3.48
                },
                {
                  "x": 1.668,
                  "y": 4.36
                },
                {
                  "x": 1.5,
                  "y": 5.0
                }
              ]
            },
            {
              "startLaneIndex": 2,
              "endLaneIndex": 1,
              "points": [
                {
                  "x": 7.5,
                  "y": -5.0
                },
                {
                  "x": 7.416,
                  "y": -4.36
                },
                {
                  "x": 7.188,
                  "y": -3.48
                },
                {
                  "x": 6.852,
                  "y": -2.42
                },
                {
                  "x": 6.444,
                  "y": -1.24
                },
                {
                  "x": 6.0,
                  "y": 0.0
                },
                {
                  "x": 5.556,
                  "y": 1.24
                },
                {
                  "x": 5.148,
                  "y": 2.42
                },
                {
                  "x": 4.812,
                  "y": 3.48
                },
                {
                  "x": 4.584,
                  "y": 4.36
                },
                {
                  "x": 4.5,
                  "y": 5.0
                }
              ]
            },
            {
              "startLaneIndex": 2,
              "endLaneIndex": 2,
              "points": [
                {
                  "x": 7.5,
                  "y": -5.0
                },
                {
                  "x": 7.5,
                  "y": -4.36
                },
                {
                  "x": 7.5,
                  "y": -3.48
                },
                {
                  "x": 7.5,
                  "y": -2.42
                },
                {
                  "x": 7.5,
                  "y": -1.24
                },
                {
                  "x": 7.5,
                  "y": 0.0
                },
                {
                  "x": 7.5,
                  "y": 1.24
                },
                {
                  "x": 7.5,
                  "y": 2.42
                },
                {
                  "x": 7.5,
                  "y": 3.48
                },
                {
                  "x": 7.5,
                  "y": 4.36
                },
                {
                  "x": 7.5,
                  "y": 5.0
                }
              ]
            }
          ]
        },
        {
          "type": "turn_left",
          "startRoad": "road_1_0_1",
          "endRoad": "road_1_1_2",
          "direction": 1,
          "laneLinks": [
            {
              "startLaneIndex": 0,
              "endLaneIndex": 0,
              "points": [
                {
                  "x": 1.5,
                  "y": -5.0
                },
                {
                  "x": 1.363,
                  "y": -4.413
                },
                {
                  "x": 0.984,
                  "y": -3.684
                },
                {
                  "x": 0.411,
                  "y": -2.8609999999999998
                },
                {
                  "x": -0.308,
                  "y": -1.992
                },
                {
                  "x": -1.125,
                  "y": -1.125
                },
                {
                  "x": -1.992,
                  "y": -0.308
                },
                {
                  "x": -2.8609999999999998,
                  "y": 0.411
                },
                {
                  "x": -3.684,
                  "y": 0.984
                },
                {
                  "x": -4.413,
                  "y": 1.363
                },
                {
                  "x": -5.0,
                  "y": 1.5
                }
              ]
            },
            {
              "startLaneIndex": 0,
              "endLaneIndex": 1,
              "points": [
                {
                  "x": 1.5,
                  "y": -5.0
                },
                {
                  "x": 1.363,
                  "y": -4.329
                },
                {
                  "x": 0.984,
                  "y": -3.372
                },
                {
                  "x": 0.411,
                  "y": -2.213
                },
                {
                  "x": -0.308,
                  "y": -0.9359999999999999
                },
                {
                  "x": -1.125,
                  "y": 0.375
                },
                {
                  "x": -1.992,
                  "y": 1.636
                },
                {
                  "x": -2.8609999999999998,
                  "y": 2.763
                },
                {
                  "x": -3.684,
                  "y": 3.672
                },
                {
                  "x": -4.413,
                  "y": 4.279
                },
                {
                  "x": -5.0,
                  "y": 4.5
                }
              ]
            },
            {
              "startLaneIndex": 0,
              "endLaneIndex": 2,
              "points": [
                {
                  "x": 1.5,
                  "y": -5.0
                },
                {
                  "x": 1.363,
                  "y": -4.245
                },
                {
                  "x": 0.984,
                  "y": -3.06
                },
                {
                  "x": 0.411,
                  "y": -1.565
                },
                {
                  "x": -0.308,
                  "y": 0.12
                },
                {
                  "x": -1.125,
                  "y": 1.875
                },
                {
                  "x": -1.992,
                  "y": 3.58
                },
                {
                  "x": -2.8609999999999998,
                  "y": 5.115
                },
                {
                  "x": -3.684,
                  "y": 6.36
                },
                {
                  "x": -4.413,
                  "y": 7.195
                },
                {
                  "x": -5.0,
                  "y": 7.5
                }
              ]
            }
          ]
        },
        {
          "type": "go_straight",
          "startRoad": "road_2_1_2",
          "endRoad": "road_1_1_2",
          "direction": 2,
          "laneLinks": [
            {
              "startLaneIndex": 1,
              "endLaneIndex": 0,
              "points": [
                {
                  "x": 5.0,
                  "y": 4.5
                },
                {
                  "x": 4.36,
                  "y": 4.416
                },
                {
                  "x": 3.48,
                  "y": 4.188
                },
                {
                  "x": 2.42,
                  "y": 3.852
                },
                {
                  "x": 1.24,
                  "y": 3.444
                },
                {
                  "x": 0.0,
                  "y": 3.0
                },
                {
                  "x": -1.24,
                  "y": 2.556
                },
                {
                  "x": -2.42,
                  "y": 2.148
                },
                {
                  "x": -3.48,
                  "y": 1.811999999999999
                },
                {
                  "x": -4.36,
                  "y": 1.584
                },
                {
                  "x": -5.0,
                  "y": 1.5
                }
              ]
            },
            {
              "startLaneIndex": 1,
              "endLaneIndex": 1,
              "points": [
                {
                  "x": 5.0,
                  "y": 4.5
                },
                {
                  "x": 4.36,
                  "y": 4.5
                },
                {
                  "x": 3.48,
                  "y": 4.5
                },
                {
                  "x": 2.42,
                  "y": 4.5
                },
                {
                  "x": 1.24,
                  "y": 4.5
                },
                {
                  "x": 0.0,
                  "y": 4.5
                },
                {
                  "x": -1.24,
                  "y": 4.5
                },
                {
                  "x": -2.42,
                  "y": 4.5
                },
                {
                  "x": -3.48,
                  "y": 4.499999999999999
                },
                {
                  "x": -4.36,
                  "y": 4.5
                },
                {
                  "x": -5.0,
                  "y": 4.5
                }
              ]
            },
            {
              "startLaneIndex": 1,
              "endLaneIndex": 2,
              "points": [
                {
                  "x": 5.0,
                  "y": 4.5
                },
                {
                  "x": 4.36,
                  "y": 4.584
                },
                {
                  "x": 3.48,
                  "y": 4.812
                },
                {
                  "x": 2.42,
                  "y": 5.148
                },
                {
                  "x": 1.24,
                  "y": 5.556
                },
                {
                  "x": 0.0,
                  "y": 6.0
                },
                {
                  "x": -1.24,
                  "y": 6.444
                },
                {
                  "x": -2.42,
                  "y": 6.852
                },
                {
                  "x": -3.48,
                  "y": 7.187999999999999
                },
                {
                  "x": -4.36,
                  "y": 7.416
                },
                {
                  "x": -5.0,
                  "y": 7.5
                }
              ]
            },
            {
              "startLaneIndex": 2,
              "endLaneIndex": 0,
              "points": [
                {
                  "x": 5.0,
                  "y": 7.5
                },
                {
                  "x": 4.36,
                  "y": 7.332
                },
                {
                  "x": 3.48,
                  "y": 6.876
                },
                {
                  "x": 2.42,
                  "y": 6.204
                },
                {
                  "x": 1.24,
                  "y": 5.388
                },
                {
                  "x": 0.0,
                  "y": 4.5
                },
                {
                  "x": -1.24,
                  "y": 3.612
                },
                {
                  "x": -2.42,
                  "y": 2.796
                },
                {
                  "x": -3.48,
                  "y": 2.124
                },
                {
                  "x": -4.36,
                  "y": 1.668
                },
                {
                  "x": -5.0,
                  "y": 1.5
                }
              ]
            },
            {
              "startLaneIndex": 2,
              "endLaneIndex": 1,
              "points": [
                {
                  "x": 5.0,
                  "y": 7.5
                },
                {
                  "x": 4.36,
                  "y": 7.416
                },
                {
                  "x": 3.48,
                  "y": 7.188
                },
                {
                  "x": 2.42,
                  "y": 6.852
                },
                {
                  "x": 1.24,
                  "y": 6.444
                },
                {
                  "x": 0.0,
                  "y": 6.0
                },
                {
                  "x": -1.24,
                  "y": 5.556
                },
                {
                  "x": -2.42,
                  "y": 5.148
                },
                {
                  "x": -3.48,
                  "y": 4.812
                },
                {
                  "x": -4.36,
                  "y": 4.584
                },
                {
                  "x": -5.0,
                  "y": 4.5
                }
              ]
            },
            {
              "startLaneIndex": 2,
              "endLaneIndex": 2,
              "points": [
                {
                  "x": 5.0,
                  "y": 7.5
                },
                {
                  "x": 4.36,
                  "y": 7.5
                },
                {
                  "x": 3.48,
                  "y": 7.5
                },
                {
                  "x": 2.42,
                  "y": 7.5
                },
                {
                  "x": 1.24,
                  "y": 7.5
                },
                {
                  "x": 0.0,
                  "y": 7.5
                },
                {
                  "x": -1.24,
                  "y": 7.5
                },
                {
                  "x": -2.42,
                  "y": 7.5
                },
                {
                  "x": -3.48,
                  "y": 7.5
                },
                {
                  "x": -4.36,
                  "y": 7.5
                },
                {
                  "x": -5.0,
                  "y": 7.5
                }
              ]
            }
          ]
        },
        {
          "type": "turn_left",
          "startRoad": "road_2_1_2",
          "endRoad": "road_1_1_3",
          "direction": 2,
          "laneLinks": [
            {
              "startLaneIndex": 0,
              "endLaneIndex": 0,
              "points": [
                {
                  "x": 5.0,
                  "y": 1.5
                },
                {
                  "x": 4.413,
                  "y": 1.363
                },
                {
                  "x": 3.684,
                  "y": 0.984
                },
                {
                  "x": 2.8609999999999998,
                  "y": 0.411
                },
                {
                  "x": 1.992,
                  "y": -0.308
                },
                {
                  "x": 1.125,
                  "y": -1.125
                },
                {
                  "x": 0.308,
                  "y": -1.992
                },
                {
                  "x": -0.411,
                  "y": -2.8609999999999998
                },
                {
                  "x": -0.984,
                  "y": -3.684
                },
                {
                  "x": -1.363,
                  "y": -4.413
                },
                {
                  "x": -1.5,
                  "y": -5.0
                }
              ]
            },
            {
              "startLaneIndex": 0,
              "endLaneIndex": 1,
              "points": [
                {
                  "x": 5.0,
                  "y": 1.5
                },
                {
                  "x": 4.329,
                  "y": 1.363
                },
                {
                  "x": 3.372,
                  "y": 0.984
                },
                {
                  "x": 2.213,
                  "y": 0.411
                },
                {
                  "x": 0.9359999999999999,
                  "y": -0.308
                },
                {
                  "x": -0.375,
                  "y": -1.125
                },
                {
                  "x": -1.636,
                  "y": -1.992
                },
                {
                  "x": -2.763,
                  "y": -2.8609999999999998
                },
                {
                  "x": -3.672,
                  "y": -3.684
                },
                {
                  "x": -4.279,
                  "y": -4.413
                },
                {
                  "x": -4.5,
                  "y": -5.0
                }
              ]
            },
            {
              "startLaneIndex": 0,
              "endLaneIndex": 2,
              "points": [
                {
                  "x": 5.0,
                  "y": 1.5
                },
                {
                  "x": 4.245,
                  "y": 1.363
                },
                {
                  "x": 3.06,
                  "y": 0.984
                },
                {
                  "x": 1.565,
                  "y": 0.411
                },
                {
                  "x": -0.12,
                  "y": -0.308
                },
                {
                  "x": -1.875,
                  "y": -1.125
                },
                {
                  "x": -3.58,
                  "y": -1.992
                },
                {
                  "x": -5.115,
                  "y": -2.8609999999999998
                },
                {
                  "x": -6.36,
                  "y": -3.684
                },
                {
                  "x": -7.195,
                  "y": -4.413
                },
                {
                  "x": -7.5,
                  "y": -5.0
                }
              ]
            }
          ]
        },
        {
          "type": "turn_left",
          "startRoad": "road_1_2_3",
          "endRoad": "road_1_1_0",
          "direction": 3,
          "laneLinks": [
            {
              "startLaneIndex": 0,
              "endLaneIndex": 0,
              "points": [
                {
                  "x": -1.5,
                  "y": 5.0
                },
                {
                  "x": -1.363,
                  "y": 4.413
                },
                {
                  "x": -0.984,
                  "y": 3.684
                },
                {
                  "x": -0.411,
                  "y": 2.8609999999999998
                },
                {
                  "x": 0.308,
                  "y": 1.992
                },
                {
                  "x": 1.125,
                  "y": 1.125
                },
                {
                  "x": 1.992,
                  "y": 0.308
                },
                {
                  "x": 2.8609999999999998,
                  "y": -0.411
                },
                {
                  "x": 3.684,
                  "y": -0.984
                },
                {
                  "x": 4.413,
                  "y": -1.363
                },
                {
                  "x": 5.0,
                  "y": -1.5
                }
              ]
            },
            {
              "startLaneIndex": 0,
              "endLaneIndex": 1,
              "points": [
                {
                  "x": -1.5,
                  "y": 5.0
                },
                {
                  "x": -1.363,
                  "y": 4.329
                },
                {
                  "x": -0.984,
                  "y": 3.372
                },
                {
                  "x": -0.411,
                  "y": 2.213
                },
                {
                  "x": 0.308,
                  "y": 0.9359999999999999
                },
                {
                  "x": 1.125,
                  "y": -0.375
                },
                {
                  "x": 1.992,
                  "y": -1.636
                },
                {
                  "x": 2.8609999999999998,
                  "y": -2.763
                },
                {
                  "x": 3.684,
                  "y": -3.672
                },
                {
                  "x": 4.413,
                  "y": -4.279
                },
                {
                  "x": 5.0,
                  "y": -4.5
                }
              ]
            },
            {
              "startLaneIndex": 0,
              "endLaneIndex": 2,
              "points": [
                {
                  "x": -1.5,
                  "y": 5.0
                },
                {
                  "x": -1.363,
                  "y": 4.245
                },
                {
                  "x": -0.984,
                  "y": 3.06
                },
                {
                  "x": -0.411,
                  "y": 1.565
                },
                {
                  "x": 0.308,
                  "y": -0.12
                },
                {
                  "x": 1.125,
                  "y": -1.875
                },
                {
                  "x": 1.992,
                  "y": -3.58
                },
                {
                  "x": 2.8609999999999998,
                  "y": -5.115
                },
                {
                  "x": 3.684,
                  "y": -6.36
                },
                {
                  "x": 4.413,
                  "y": -7.195
                },
                {
                  "x": 5.0,
                  "y": -7.5
                }
              ]
            }
          ]
        },
        {
          "type": "go_straight",
          "startRoad": "road_1_2_3",
          "endRoad": "road_1_1_3",
          "direction": 3,
          "laneLinks": [
            {
              "startLaneIndex": 1,
              "endLaneIndex": 0,
              "points": [
                {
                  "x": -4.5,
                  "y": 5.0
                },
                {
                  "x": -4.416,
                  "y": 4.36
                },
                {
                  "x": -4.188,
                  "y": 3.48
                },
                {
                  "x": -3.852,
                  "y": 2.42
                },
                {
                  "x": -3.444,
                  "y": 1.24
                },
                {
                  "x": -3.0,
                  "y": 0.0
                },
                {
                  "x": -2.556,
                  "y": -1.24
                },
                {
                  "x": -2.148,
                  "y": -2.42
                },
                {
                  "x": -1.811999999999999,
                  "y": -3.48
                },
                {
                  "x": -1.584,
                  "y": -4.36
                },
                {
                  "x": -1.5,
                  "y": -5.0
                }
              ]
            },
            {
              "startLaneIndex": 1,
              "endLaneIndex": 1,
              "points": [
                {
                  "x": -4.5,
                  "y": 5.0
                },
                {
                  "x": -4.5,
                  "y": 4.36
                },
                {
                  "x": -4.5,
                  "y": 3.48
                },
                {
                  "x": -4.5,
                  "y": 2.42
                },
                {
                  "x": -4.5,
                  "y": 1.24
                },
                {
                  "x": -4.5,
                  "y": 0.0
                },
                {
                  "x": -4.5,
                  "y": -1.24
                },
                {
                  "x": -4.5,
                  "y": -2.42
                },
                {
                  "x": -4.499999999999999,
                  "y": -3.48
                },
                {
                  "x": -4.5,
                  "y": -4.36
                },
                {
                  "x": -4.5,
                  "y": -5.0
                }
              ]
            },
            {
              "startLaneIndex": 1,
              "endLaneIndex": 2,
              "points": [
                {
                  "x": -4.5,
                  "y": 5.0
                },
                {
                  "x": -4.584,
                  "y": 4.36
                },
                {
                  "x": -4.812,
                  "y": 3.48
                },
                {
                  "x": -5.148,
                  "y": 2.42
                },
                {
                  "x": -5.556,
                  "y": 1.24
                },
                {
                  "x": -6.0,
                  "y": 0.0
                },
                {
                  "x": -6.444,
                  "y": -1.24
                },
                {
                  "x": -6.852,
                  "y": -2.42
                },
                {
                  "x": -7.187999999999999,
                  "y": -3.48
                },
                {
                  "x": -7.416,
                  "y": -4.36
                },
                {
                  "x": -7.5,
                  "y": -5.0
                }
              ]
            },
            {
              "startLaneIndex": 2,
              "endLaneIndex": 0,
              "points": [
                {
                  "x": -7.5,
                  "y": 5.0
                },
                {
                  "x": -7.332,
                  "y": 4.36
                },
                {
                  "x": -6.876,
                  "y": 3.48
                },
                {
                  "x": -6.204,
                  "y": 2.42
                },
                {
                  "x": -5.388,
                  "y": 1.24
                },
                {
                  "x": -4.5,
                  "y": 0.0
                },
                {
                  "x": -3.612,
                  "y": -1.24
                },
                {
                  "x": -2.796,
                  "y": -2.42
                },
                {
                  "x": -2.124,
                  "y": -3.48
                },
                {
                  "x": -1.668,
                  "y": -4.36
                },
                {
                  "x": -1.5,
                  "y": -5.0
                }
              ]
            },
            {
              "startLaneIndex": 2,
              "endLaneIndex": 1,
              "points": [
                {
                  "x": -7.5,
                  "y": 5.0
                },
                {
                  "x": -7.416,
                  "y": 4.36
                },
                {
                  "x": -7.188,
                  "y": 3.48
                },
                {
                  "x": -6.852,
                  "y": 2.42
                },
                {
                  "x": -6.444,
                  "y": 1.24
                },
                {
                  "x": -6.0,
                  "y": 0.0
                },
                {
                  "x": -5.556,
                  "y": -1.24
                },
                {
                  "x": -5.148,
                  "y": -2.42
                },
                {
                  "x": -4.812,
                  "y": -3.48
                },
                {
                  "x": -4.584,
                  "y": -4.36
                },
                {
                  "x": -4.5,
                  "y": -5.0
                }
              ]
            },
            {
              "startLaneIndex": 2,
              "endLaneIndex": 2,
              "points": [
                {
                  "x": -7.5,
                  "y": 5.0
                },
                {
                  "x": -7.5,
                  "y": 4.36
                },
                {
                  "x": -7.5,
                  "y": 3.48
                },
                {
                  "x": -7.5,
                  "y": 2.42
                },
                {
                  "x": -7.5,
                  "y": 1.24
                },
                {
                  "x": -7.5,
                  "y": 0.0
                },
                {
                  "x": -7.5,
                  "y": -1.24
                },
                {
                  "x": -7.5,
                  "y": -2.42
                },
                {
                  "x": -7.5,
                  "y": -3.48
                },
                {
                  "x": -7.5,
                  "y": -4.36
                },
                {
                  "x": -7.5,
                  "y": -5.0
                }
              ]
            }
          ]
        }
      ],
      "trafficLight": {
        "roadLinkIndices": [
          0,
          1,
          2,
          3,
          4,
          5,
          6,
          7
        ],
        "lightphases": [
          {
            "time": 5,
            "availableRoadLinks": []
          },
          {
            "time": 30,
            "availableRoadLinks": [
              0,
              4
            ]
          },
          {
            "time": 30,
            "availableRoadLinks": [
              2,
              7
            ]
          },
          {
            "time": 30,
            "availableRoadLinks": [
              1,
              5
            ]
          },
          {
            "time": 30,
            "availableRoadLinks": [
              3,
              6
            ]
          },
          {
            "time": 30,
            "availableRoadLinks": [
              0,
              1
            ]
          },
          {
            "time": 30,
            "availableRoadLinks": [
              4,
              5
            ]
          },
          {
            "time": 30,
            "availableRoadLinks": [
              2,
              3
            ]
          },
          {
            "time": 30,
            "availableRoadLinks": [
              6,
              7
            ]
          }
        ]
      },
      "virtual": false
    },
    {
      "id": "intersection_1_2",
      "point": {
        "x": 0,
        "y": 300
      },
      "width": 5,
      "roads": [
        "road_0_2_0",
        "road_1_1_1",
        "road_2_2_2",
        "road_1_3_3",
        "road_1_2_0",
        "road_1_2_1",
        "road_1_2_2",
        "road_1_2_3"
      ],
      "roadLinks": [
        {
          "type": "go_straight",
          "startRoad": "road_0_2_0",
          "endRoad": "road_1_2_0",
          "direction": 0,
          "laneLinks": [
            {
              "startLaneIndex": 1,
              "endLaneIndex": 0,
              "points": [
                {
                  "x": -5.0,
                  "y": 295.5
                },
                {
                  "x": -4.36,
                  "y": 295.584
                },
                {
                  "x": -3.48,
                  "y": 295.812
                },
                {
                  "x": -2.42,
                  "y": 296.148
                },
                {
                  "x": -1.24,
                  "y": 296.556
                },
                {
                  "x": 0.0,
                  "y": 297.0
                },
                {
                  "x": 1.24,
                  "y": 297.444
                },
                {
                  "x": 2.42,
                  "y": 297.852
                },
                {
                  "x": 3.48,
                  "y": 298.188
                },
                {
                  "x": 4.36,
                  "y": 298.416
                },
                {
                  "x": 5.0,
                  "y": 298.5
                }
              ]
            },
            {
              "startLaneIndex": 1,
              "endLaneIndex": 1,
              "points": [
                {
                  "x": -5.0,
                  "y": 295.5
                },
                {
                  "x": -4.36,
                  "y": 295.5
                },
                {
                  "x": -3.48,
                  "y": 295.5
                },
                {
                  "x": -2.42,
                  "y": 295.5
                },
                {
                  "x": -1.24,
                  "y": 295.5
                },
                {
                  "x": 0.0,
                  "y": 295.5
                },
                {
                  "x": 1.24,
                  "y": 295.5
                },
                {
                  "x": 2.42,
                  "y": 295.5
                },
                {
                  "x": 3.48,
                  "y": 295.5
                },
                {
                  "x": 4.36,
                  "y": 295.5
                },
                {
                  "x": 5.0,
                  "y": 295.5
                }
              ]
            },
            {
              "startLaneIndex": 1,
              "endLaneIndex": 2,
              "points": [
                {
                  "x": -5.0,
                  "y": 295.5
                },
                {
                  "x": -4.36,
                  "y": 295.416
                },
                {
                  "x": -3.48,
                  "y": 295.188
                },
                {
                  "x": -2.42,
                  "y": 294.852
                },
                {
                  "x": -1.24,
                  "y": 294.444
                },
                {
                  "x": 0.0,
                  "y": 294.0
                },
                {
                  "x": 1.24,
                  "y": 293.556
                },
                {
                  "x": 2.42,
                  "y": 293.148
                },
                {
                  "x": 3.48,
                  "y": 292.812
                },
                {
                  "x": 4.36,
                  "y": 292.584
                },
                {
                  "x": 5.0,
                  "y": 292.5
                }
              ]
            },
            {
              "startLaneIndex": 2,
              "endLaneIndex": 0,
              "points": [
                {
                  "x": -5.0,
                  "y": 292.5
                },
                {
                  "x": -4.36,
                  "y": 292.668
                },
                {
                  "x": -3.48,
                  "y": 293.124
                },
                {
                  "x": -2.42,
                  "y": 293.796
                },
                {
                  "x": -1.24,
                  "y": 294.612
                },
                {
                  "x": 0.0,
                  "y": 295.5
                },
                {
                  "x": 1.24,
                  "y": 296.388
                },
                {
                  "x": 2.42,
                  "y": 297.204
                },
                {
                  "x": 3.48,
                  "y": 297.876
                },
                {
                  "x": 4.36,
                  "y": 298.332
                },
                {
                  "x": 5.0,
                  "y": 298.5
                }
              ]
            },
            {
              "startLaneIndex": 2,
              "endLaneIndex": 1,
              "points": [
                {
                  "x": -5.0,
                  "y": 292.5
                },
                {
                  "x": -4.36,
                  "y": 292.584
                },
                {
                  "x": -3.48,
                  "y": 292.812
                },
                {
                  "x": -2.42,
                  "y": 293.148
                },
                {
                  "x": -1.24,
                  "y": 293.556
                },
                {
                  "x": 0.0,
                  "y": 294.0
                },
                {
                  "x": 1.24,
                  "y": 294.444
                },
                {
                  "x": 2.42,
                  "y": 294.852
                },
                {
                  "x": 3.48,
                  "y": 295.188
                },
                {
                  "x": 4.36,
                  "y": 295.416
                },
                {
                  "x": 5.0,
                  "y": 295.5
                }
              ]
            },
            {
              "startLaneIndex": 2,
              "endLaneIndex": 2,
              "points": [
                {
                  "x": -5.0,
                  "y": 292.5
                },
                {
                  "x": -4.36,
                  "y": 292.5
                },
                {
                  "x": -3.48,
                  "y": 292.5
                },
                {
                  "x": -2.42,
                  "y": 292.5
                },
                {
                  "x": -1.24,
                  "y": 292.5
                },
                {
                  "x": 0.0,
                  "y": 292.5
                },
                {
                  "x": 1.24,
                  "y": 292.5
                },
                {
                  "x": 2.42,
                  "y": 292.5
                },
                {
                  "x": 3.48,
                  "y": 292.5
                },
                {
                  "x": 4.36,
                  "y": 292.5
                },
                {
                  "x": 5.0,
                  "y": 292.5
                }
              ]
            }
          ]
        },
        {
          "type": "turn_left",
          "startRoad": "road_0_2_0",
          "endRoad": "road_1_2_1",
          "direction": 0,
          "laneLinks": [
            {
              "startLaneIndex": 0,
              "endLaneIndex": 0,
              "points": [
                {
                  "x": -5.0,
                  "y": 298.5
                },
                {
                  "x": -4.413,
                  "y": 298.637
                },
                {
                  "x": -3.684,
                  "y": 299.016
                },
                {
                  "x": -2.8609999999999998,
                  "y": 299.589
                },
                {
                  "x": -1.992,
                  "y": 300.308
                },
                {
                  "x": -1.125,
                  "y": 301.125
                },
                {
                  "x": -0.308,
                  "y": 301.992
                },
                {
                  "x": 0.411,
                  "y": 302.861
                },
                {
                  "x": 0.984,
                  "y": 303.68399999999997
                },
                {
                  "x": 1.363,
                  "y": 304.413
                },
                {
                  "x": 1.5,
                  "y": 305.0
                }
              ]
            },
            {
              "startLaneIndex": 0,
              "endLaneIndex": 1,
              "points": [
                {
                  "x": -5.0,
                  "y": 298.5
                },
                {
                  "x": -4.329,
                  "y": 298.637
                },
                {
                  "x": -3.372,
                  "y": 299.016
                },
                {
                  "x": -2.213,
                  "y": 299.589
                },
                {
                  "x": -0.9359999999999999,
                  "y": 300.308
                },
                {
                  "x": 0.375,
                  "y": 301.125
                },
                {
                  "x": 1.636,
                  "y": 301.992
                },
                {
                  "x": 2.763,
                  "y": 302.861
                },
                {
                  "x": 3.672,
                  "y": 303.68399999999997
                },
                {
                  "x": 4.279,
                  "y": 304.413
                },
                {
                  "x": 4.5,
                  "y": 305.0
                }
              ]
            },
            {
              "startLaneIndex": 0,
              "endLaneIndex": 2,
              "points": [
                {
                  "x": -5.0,
                  "y": 298.5
                },
                {
                  "x": -4.245,
                  "y": 298.637
                },
                {
                  "x": -3.06,
                  "y": 299.016
                },
                {
                  "x": -1.565,
                  "y": 299.589
                },
                {
                  "x": 0.12,
                  "y": 300.308
                },
                {
                  "x": 1.875,
                  "y": 301.125
                },
                {
                  "x": 3.58,
                  "y": 301.992
                },
                {
                  "x": 5.115,
                  "y": 302.861
                },
                {
                  "x": 6.36,
                  "y": 303.68399999999997
                },
                {
                  "x": 7.195,
                  "y": 304.413
                },
                {
                  "x": 7.5,
                  "y": 305.0
                }
              ]
            }
          ]
        },
        {
          "type": "go_straight",
          "startRoad": "road_1_1_1",
          "endRoad": "road_1_2_1",
          "direction": 1,
          "laneLinks": [
            {
              "startLaneIndex": 1,
              "endLaneIndex": 0,
              "points": [
                {
                  "x": 4.5,
                  "y": 295.0
                },
                {
                  "x": 4.416,
                  "y": 295.64
                },
                {
                  "x": 4.188,
                  "y": 296.52
                },
                {
                  "x": 3.852,
                  "y": 297.58
                },
                {
                  "x": 3.444,
                  "y": 298.76
                },
                {
                  "x": 3.0,
                  "y": 300.0
                },
                {
                  "x": 2.556,
                  "y": 301.24
                },
                {
                  "x": 2.148,
                  "y": 302.42
                },
                {
                  "x": 1.811999999999999,
                  "y": 303.48
                },
                {
                  "x": 1.584,
                  "y": 304.36
                },
                {
                  "x": 1.5,
                  "y": 305.0
                }
              ]
            },
            {
              "startLaneIndex": 1,
              "endLaneIndex": 1,
              "points": [
                {
                  "x": 4.5,
                  "y": 295.0
                },
                {
                  "x": 4.5,
                  "y": 295.64
                },
                {
                  "x": 4.5,
                  "y": 296.52
                },
                {
                  "x": 4.5,
                  "y": 297.58
                },
                {
                  "x": 4.5,
                  "y": 298.76
                },
                {
                  "x": 4.5,
                  "y": 300.0
                },
                {
                  "x": 4.5,
                  "y": 301.24
                },
                {
                  "x": 4.5,
                  "y": 302.42
                },
                {
                  "x": 4.499999999999999,
                  "y": 303.48
                },
                {
                  "x": 4.5,
                  "y": 304.36
                },
                {
                  "x": 4.5,
                  "y": 305.0
                }
              ]
            },
            {
              "startLaneIndex": 1,
              "endLaneIndex": 2,
              "points": [
                {
                  "x": 4.5,
                  "y": 295.0
                },
                {
                  "x": 4.584,
                  "y": 295.64
                },
                {
                  "x": 4.812,
                  "y": 296.52
                },
                {
                  "x": 5.148,
                  "y": 297.58
                },
                {
                  "x": 5.556,
                  "y": 298.76
                },
                {
                  "x": 6.0,
                  "y": 300.0
                },
                {
                  "x": 6.444,
                  "y": 301.24
                },
                {
                  "x": 6.852,
                  "y": 302.42
                },
                {
                  "x": 7.187999999999999,
                  "y": 303.48
                },
                {
                  "x": 7.416,
                  "y": 304.36
                },
                {
                  "x": 7.5,
                  "y": 305.0
                }
              ]
            },
            {
              "startLaneIndex": 2,
              "endLaneIndex": 0,
              "points": [
                {
                  "x": 7.5,
                  "y": 295.0
                },
                {
                  "x": 7.332,
                  "y": 295.64
                },
                {
                  "x": 6.876,
                  "y": 296.52
                },
                {
                  "x": 6.204,
                  "y": 297.58
                },
                {
                  "x": 5.388,
                  "y": 298.76
                },
                {
                  "x": 4.5,
                  "y": 300.0
                },
                {
                  "x": 3.612,
                  "y": 301.24
                },
                {
                  "x": 2.796,
                  "y": 302.42
                },
                {
                  "x": 2.124,
                  "y": 303.48
                },
                {
                  "x": 1.668,
                  "y": 304.36
                },
                {
                  "x": 1.5,
                  "y": 305.0
                }
              ]
            },
            {
              "startLaneIndex": 2,
              "endLaneIndex": 1,
              "points": [
                {
                  "x": 7.5,
                  "y": 295.0
                },
                {
                  "x": 7.416,
                  "y": 295.64
                },
                {
                  "x": 7.188,
                  "y": 296.52
                },
                {
                  "x": 6.852,
                  "y": 297.58
                },
                {
                  "x": 6.444,
                  "y": 298.76
                },
                {
                  "x": 6.0,
                  "y": 300.0
                },
                {
                  "x": 5.556,
                  "y": 301.24
                },
                {
                  "x": 5.148,
                  "y": 302.42
                },
                {
                  "x": 4.812,
                  "y": 303.48
                },
                {
                  "x": 4.584,
                  "y": 304.36
                },
                {
                  "x": 4.5,
                  "y": 305.0
                }
              ]
            },
            {
              "startLaneIndex": 2,
              "endLaneIndex": 2,
              "points": [
                {
                  "x": 7.5,
                  "y": 295.0
                },
                {
                  "x": 7.5,
                  "y": 295.64
                },
                {
                  "x": 7.5,
                  "y": 296.52
                },
                {
                  "x": 7.5,
                  "y": 297.58
                },
                {
                  "x": 7.5,
                  "y": 298.76
                },
                {
                  "x": 7.5,
                  "y": 300.0
                },
                {
                  "x": 7.5,
                  "y": 301.24
                },
                {
                  "x": 7.5,
                  "y": 302.42
                },
                {
                  "x": 7.5,
                  "y": 303.48
                },
                {
                  "x": 7.5,
                  "y": 304.36
                },
                {
                  "x": 7.5,
                  "y": 305.0
                }
              ]
            }
          ]
        },
        {
          "type": "turn_left",
          "startRoad": "road_1_1_1",
          "endRoad": "road_1_2_2",
          "direction": 1,
          "laneLinks": [
            {
              "startLaneIndex": 0,
              "endLaneIndex": 0,
              "points": [
                {
                  "x": 1.5,
                  "y": 295.0
                },
                {
                  "x": 1.363,
                  "y": 295.587
                },
                {
                  "x": 0.984,
                  "y": 296.316
                },
                {
                  "x": 0.411,
                  "y": 297.139
                },
                {
                  "x": -0.308,
                  "y": 298.008
                },
                {
                  "x": -1.125,
                  "y": 298.875
                },
                {
                  "x": -1.992,
                  "y": 299.692
                },
                {
                  "x": -2.8609999999999998,
                  "y": 300.411
                },
                {
                  "x": -3.684,
                  "y": 300.984
                },
                {
                  "x": -4.413,
                  "y": 301.363
                },
                {
                  "x": -5.0,
                  "y": 301.5
                }
              ]
            },
            {
              "startLaneIndex": 0,
              "endLaneIndex": 1,
              "points": [
                {
                  "x": 1.5,
                  "y": 295.0
                },
                {
                  "x": 1.363,
                  "y": 295.671
                },
                {
                  "x": 0.984,
                  "y": 296.628
                },
                {
                  "x": 0.411,
                  "y": 297.787
                },
                {
                  "x": -0.308,
                  "y": 299.064
                },
                {
                  "x": -1.125,
                  "y": 300.375
                },
                {
                  "x": -1.992,
                  "y": 301.636
                },
                {
                  "x": -2.8609999999999998,
                  "y": 302.763
                },
                {
                  "x": -3.684,
                  "y": 303.672
                },
                {
                  "x": -4.413,
                  "y": 304.279
                },
                {
                  "x": -5.0,
                  "y": 304.5
                }
              ]
            },
            {
              "startLaneIndex": 0,
              "endLaneIndex": 2,
              "points": [
                {
                  "x": 1.5,
                  "y": 295.0
                },
                {
                  "x": 1.363,
                  "y": 295.755
                },
                {
                  "x": 0.984,
                  "y": 296.94
                },
                {
                  "x": 0.411,
                  "y": 298.435
                },
                {
                  "x": -0.308,
                  "y": 300.12
                },
                {
                  "x": -1.125,
                  "y": 301.875
                },
                {
                  "x": -1.992,
                  "y": 303.58
                },
                {
                  "x": -2.8609999999999998,
                  "y": 305.115
                },
                {
                  "x": -3.684,
                  "y": 306.36
                },
                {
                  "x": -4.413,
                  "y": 307.195
                },
                {
                  "x": -5.0,
                  "y": 307.5
                }
              ]
            }
          ]
        },
        {
          "type": "go_straight",
          "startRoad": "road_2_2_2",
          "endRoad": "road_1_2_2",
          "direction": 2,
          "laneLinks": [
            {
              "startLaneIndex": 1,
              "endLaneIndex": 0,
              "points": [
                {
                  "x": 5.0,
                  "y": 304.5
                },
                {
                  "x": 4.36,
                  "y": 304.416
                },
                {
                  "x": 3.48,
                  "y": 304.188
                },
                {
                  "x": 2.42,
                  "y": 303.852
                },
                {
                  "x": 1.24,
                  "y": 303.444
                },
                {
                  "x": 0.0,
                  "y": 303.0
                },
                {
                  "x": -1.24,
                  "y": 302.556
                },
                {
                  "x": -2.42,
                  "y": 302.148
                },
                {
                  "x": -3.48,
                  "y": 301.812
                },
                {
                  "x": -4.36,
                  "y": 301.584
                },
                {
                  "x": -5.0,
                  "y": 301.5
                }
              ]
            },
            {
              "startLaneIndex": 1,
              "endLaneIndex": 1,
              "points": [
                {
                  "x": 5.0,
                  "y": 304.5
                },
                {
                  "x": 4.36,
                  "y": 304.5
                },
                {
                  "x": 3.48,
                  "y": 304.5
                },
                {
                  "x": 2.42,
                  "y": 304.5
                },
                {
                  "x": 1.24,
                  "y": 304.5
                },
                {
                  "x": 0.0,
                  "y": 304.5
                },
                {
                  "x": -1.24,
                  "y": 304.5
                },
                {
                  "x": -2.42,
                  "y": 304.5
                },
                {
                  "x": -3.48,
                  "y": 304.5
                },
                {
                  "x": -4.36,
                  "y": 304.5
                },
                {
                  "x": -5.0,
                  "y": 304.5
                }
              ]
            },
            {
              "startLaneIndex": 1,
              "endLaneIndex": 2,
              "points": [
                {
                  "x": 5.0,
                  "y": 304.5
                },
                {
                  "x": 4.36,
                  "y": 304.584
                },
                {
                  "x": 3.48,
                  "y": 304.812
                },
                {
                  "x": 2.42,
                  "y": 305.148
                },
                {
                  "x": 1.24,
                  "y": 305.556
                },
                {
                  "x": 0.0,
                  "y": 306.0
                },
                {
                  "x": -1.24,
                  "y": 306.444
                },
                {
                  "x": -2.42,
                  "y": 306.852
                },
                {
                  "x": -3.48,
                  "y": 307.188
                },
                {
                  "x": -4.36,
                  "y": 307.416
                },
                {
                  "x": -5.0,
                  "y": 307.5
                }
              ]
            },
            {
              "startLaneIndex": 2,
              "endLaneIndex": 0,
              "points": [
                {
                  "x": 5.0,
                  "y": 307.5
                },
                {
                  "x": 4.36,
                  "y": 307.332
                },
                {
                  "x": 3.48,
                  "y": 306.876
                },
                {
                  "x": 2.42,
                  "y": 306.204
                },
                {
                  "x": 1.24,
                  "y": 305.388
                },
                {
                  "x": 0.0,
                  "y": 304.5
                },
                {
                  "x": -1.24,
                  "y": 303.612
                },
                {
                  "x": -2.42,
                  "y": 302.796
                },
                {
                  "x": -3.48,
                  "y": 302.124
                },
                {
                  "x": -4.36,
                  "y": 301.668
                },
                {
                  "x": -5.0,
                  "y": 301.5
                }
              ]
            },
            {
              "startLaneIndex": 2,
              "endLaneIndex": 1,
              "points": [
                {
                  "x": 5.0,
                  "y": 307.5
                },
                {
                  "x": 4.36,
                  "y": 307.416
                },
                {
                  "x": 3.48,
                  "y": 307.188
                },
                {
                  "x": 2.42,
                  "y": 306.852
                },
                {
                  "x": 1.24,
                  "y": 306.444
                },
                {
                  "x": 0.0,
                  "y": 306.0
                },
                {
                  "x": -1.24,
                  "y": 305.556
                },
                {
                  "x": -2.42,
                  "y": 305.148
                },
                {
                  "x": -3.48,
                  "y": 304.812
                },
                {
                  "x": -4.36,
                  "y": 304.584
                },
                {
                  "x": -5.0,
                  "y": 304.5
                }
              ]
            },
            {
              "startLaneIndex": 2,
              "endLaneIndex": 2,
              "points": [
                {
                  "x": 5.0,
                  "y": 307.5
                },
                {
                  "x": 4.36,
                  "y": 307.5
                },
                {
                  "x": 3.48,
                  "y": 307.5
                },
                {
                  "x": 2.42,
                  "y": 307.5
                },
                {
                  "x": 1.24,
                  "y": 307.5
                },
                {
                  "x": 0.0,
                  "y": 307.5
                },
                {
                  "x": -1.24,
                  "y": 307.5
                },
                {
                  "x": -2.42,
                  "y": 307.5
                },
                {
                  "x": -3.48,
                  "y": 307.5
                },
                {
                  "x": -4.36,
                  "y": 307.5
                },
                {
                  "x": -5.0,
                  "y": 307.5
                }
              ]
            }
          ]
        },
        {
          "type": "turn_left",
          "startRoad": "road_2_2_2",
          "endRoad": "road_1_2_3",
          "direction": 2,
          "laneLinks": [
            {
              "startLaneIndex": 0,
              "endLaneIndex": 0,
              "points": [
                {
                  "x": 5.0,
                  "y": 301.5
                },
                {
                  "x": 4.413,
                  "y": 301.363
                },
                {
                  "x": 3.684,
                  "y": 300.984
                },
                {
                  "x": 2.8609999999999998,
                  "y": 300.411
                },
                {
                  "x": 1.992,
                  "y": 299.692
                },
                {
                  "x": 1.125,
                  "y": 298.875
                },
                {
                  "x": 0.308,
                  "y": 298.008
                },
                {
                  "x": -0.411,
                  "y": 297.139
                },
                {
                  "x": -0.984,
                  "y": 296.316
                },
                {
                  "x": -1.363,
                  "y": 295.587
                },
                {
                  "x": -1.5,
                  "y": 295.0
                }
              ]
            },
            {
              "startLaneIndex": 0,
              "endLaneIndex": 1,
              "points": [
                {
                  "x": 5.0,
                  "y": 301.5
                },
                {
                  "x": 4.329,
                  "y": 301.363
                },
                {
                  "x": 3.372,
                  "y": 300.984
                },
                {
                  "x": 2.213,
                  "y": 300.411
                },
                {
                  "x": 0.9359999999999999,
                  "y": 299.692
                },
                {
                  "x": -0.375,
                  "y": 298.875
                },
                {
                  "x": -1.636,
                  "y": 298.008
                },
                {
                  "x": -2.763,
                  "y": 297.139
                },
                {
                  "x": -3.672,
                  "y": 296.316
                },
                {
                  "x": -4.279,
                  "y": 295.587
                },
                {
                  "x": -4.5,
                  "y": 295.0
                }
              ]
            },
            {
              "startLaneIndex": 0,
              "endLaneIndex": 2,
              "points": [
                {
                  "x": 5.0,
                  "y": 301.5
                },
                {
                  "x": 4.245,
                  "y": 301.363
                },
                {
                  "x": 3.06,
                  "y": 300.984
                },
                {
                  "x": 1.565,
                  "y": 300.411
                },
                {
                  "x": -0.12,
                  "y": 299.692
                },
                {
                  "x": -1.875,
                  "y": 298.875
                },
                {
                  "x": -3.58,
                  "y": 298.008
                },
                {
                  "x": -5.115,
                  "y": 297.139
                },
                {
                  "x": -6.36,
                  "y": 296.316
                },
                {
                  "x": -7.195,
                  "y": 295.587
                },
                {
                  "x": -7.5,
                  "y": 295.0
                }
              ]
            }
          ]
        },
        {
          "type": "turn_left",
          "startRoad": "road_1_3_3",
          "endRoad": "road_1_2_0",
          "direction": 3,
          "laneLinks": [
            {
              "startLaneIndex": 0,
              "endLaneIndex": 0,
              "points": [
                {
                  "x": -1.5,
                  "y": 305.0
                },
                {
                  "x": -1.363,
                  "y": 304.413
                },
                {
                  "x": -0.984,
                  "y": 303.68399999999997
                },
                {
                  "x": -0.411,
                  "y": 302.861
                },
                {
                  "x": 0.308,
                  "y": 301.992
                },
                {
                  "x": 1.125,
                  "y": 301.125
                },
                {
                  "x": 1.992,
                  "y": 300.308
                },
                {
                  "x": 2.8609999999999998,
                  "y": 299.589
                },
                {
                  "x": 3.684,
                  "y": 299.016
                },
                {
                  "x": 4.413,
                  "y": 298.637
                },
                {
                  "x": 5.0,
                  "y": 298.5
                }
              ]
            },
            {
              "startLaneIndex": 0,
              "endLaneIndex": 1,
              "points": [
                {
                  "x": -1.5,
                  "y": 305.0
                },
                {
                  "x": -1.363,
                  "y": 304.329
                },
                {
                  "x": -0.984,
                  "y": 303.372
                },
                {
                  "x": -0.411,
                  "y": 302.213
                },
                {
                  "x": 0.308,
                  "y": 300.936
                },
                {
                  "x": 1.125,
                  "y": 299.625
                },
                {
                  "x": 1.992,
                  "y": 298.364
                },
                {
                  "x": 2.8609999999999998,
                  "y": 297.237
                },
                {
                  "x": 3.684,
                  "y": 296.328
                },
                {
                  "x": 4.413,
                  "y": 295.721
                },
                {
                  "x": 5.0,
                  "y": 295.5
                }
              ]
            },
            {
              "startLaneIndex": 0,
              "endLaneIndex": 2,
              "points": [
                {
                  "x": -1.5,
                  "y": 305.0
                },
                {
                  "x": -1.363,
                  "y": 304.245
                },
                {
                  "x": -0.984,
                  "y": 303.06
                },
                {
                  "x": -0.411,
                  "y": 301.565
                },
                {
                  "x": 0.308,
                  "y": 299.88
                },
                {
                  "x": 1.125,
                  "y": 298.125
                },
                {
                  "x": 1.992,
                  "y": 296.42
                },
                {
                  "x": 2.8609999999999998,
                  "y": 294.885
                },
                {
                  "x": 3.684,
                  "y": 293.64
                },
                {
                  "x": 4.413,
                  "y": 292.805
                },
                {
                  "x": 5.0,
                  "y": 292.5
                }
              ]
            }
          ]
        },
        {
          "type": "go_straight",
          "startRoad": "road_1_3_3",
          "endRoad": "road_1_2_3",
          "direction": 3,
          "laneLinks": [
            {
              "startLaneIndex": 1,
              "endLaneIndex": 0,
              "points": [
                {
                  "x": -4.5,
                  "y": 305.0
                },
                {
                  "x": -4.416,
                  "y": 304.36
                },
                {
                  "x": -4.188,
                  "y": 303.48
                },
                {
                  "x": -3.852,
                  "y": 302.42
                },
                {
                  "x": -3.444,
                  "y": 301.24
                },
                {
                  "x": -3.0,
                  "y": 300.0
                },
                {
                  "x": -2.556,
                  "y": 298.76
                },
                {
                  "x": -2.148,
                  "y": 297.58
                },
                {
                  "x": -1.811999999999999,
                  "y": 296.52
                },
                {
                  "x": -1.584,
                  "y": 295.64
                },
                {
                  "x": -1.5,
                  "y": 295.0
                }
              ]
            },
            {
              "startLaneIndex": 1,
              "endLaneIndex": 1,
              "points": [
                {
                  "x": -4.5,
                  "y": 305.0
                },
                {
                  "x": -4.5,
                  "y": 304.36
                },
                {
                  "x": -4.5,
                  "y": 303.48
                },
                {
                  "x": -4.5,
                  "y": 302.42
                },
                {
                  "x": -4.5,
                  "y": 301.24
                },
                {
                  "x": -4.5,
                  "y": 300.0
                },
                {
                  "x": -4.5,
                  "y": 298.76
                },
                {
                  "x": -4.5,
                  "y": 297.58
                },
                {
                  "x": -4.499999999999999,
                  "y": 296.52
                },
                {
                  "x": -4.5,
                  "y": 295.64
                },
                {
                  "x": -4.5,
                  "y": 295.0
                }
              ]
            },
            {
              "startLaneIndex": 1,
              "endLaneIndex": 2,
              "points": [
                {
                  "x": -4.5,
                  "y": 305.0
                },
                {
                  "x": -4.584,
                  "y": 304.36
                },
                {
                  "x": -4.812,
                  "y": 303.48
                },
                {
                  "x": -5.148,
                  "y": 302.42
                },
                {
                  "x": -5.556,
                  "y": 301.24
                },
                {
                  "x": -6.0,
                  "y": 300.0
                },
                {
                  "x": -6.444,
                  "y": 298.76
                },
                {
                  "x": -6.852,
                  "y": 297.58
                },
                {
                  "x": -7.187999999999999,
                  "y": 296.52
                },
                {
                  "x": -7.416,
                  "y": 295.64
                },
                {
                  "x": -7.5,
                  "y": 295.0
                }
              ]
            },
            {
              "startLaneIndex": 2,
              "endLaneIndex": 0,
              "points": [
                {
                  "x": -7.5,
                  "y": 305.0
                },
                {
                  "x": -7.332,
                  "y": 304.36
                },
                {
                  "x": -6.876,
                  "y": 303.48
                },
                {
                  "x": -6.204,
                  "y": 302.42
                },
                {
                  "x": -5.388,
                  "y": 301.24
                },
                {
                  "x": -4.5,
                  "y": 300.0
                },
                {
                  "x": -3.612,
                  "y": 298.76
                },
                {
                  "x": -2.796,
                  "y": 297.58
                },
                {
                  "x": -2.124,
                  "y": 296.52
                },
                {
                  "x": -1.668,
                  "y": 295.64
                },
                {
                  "x": -1.5,
                  "y": 295.0
                }
              ]
            },
            {
              "startLaneIndex": 2,
              "endLaneIndex": 1,
              "points": [
                {
                  "x": -7.5,
                  "y": 305.0
                },
                {
                  "x": -7.416,
                  "y": 304.36
                },
                {
                  "x": -7.188,
                  "y": 303.48
                },
                {
                  "x": -6.852,
                  "y": 302.42
                },
                {
                  "x": -6.444,
                  "y": 301.24
                },
                {
                  "x": -6.0,
                  "y": 300.0
                },
                {
                  "x": -5.556,
                  "y": 298.76
                },
                {
                  "x": -5.148,
                  "y": 297.58
                },
                {
                  "x": -4.812,
                  "y": 296.52
                },
                {
                  "x": -4.584,
                  "y": 295.64
                },
                {
                  "x": -4.5,
                  "y": 295.0
                }
              ]
            },
            {
              "startLaneIndex": 2,
              "endLaneIndex": 2,
              "points": [
                {
                  "x": -7.5,
                  "y": 305.0
                },
                {
                  "x": -7.5,
                  "y": 304.36
                },
                {
                  "x": -7.5,
                  "y": 303.48
                },
                {
                  "x": -7.5,
                  "y": 302.42
                },
                {
                  "x": -7.5,
                  "y": 301.24
                },
                {
                  "x": -7.5,
                  "y": 300.0
                },
                {
                  "x": -7.5,
                  "y": 298.76
                },
                {
                  "x": -7.5,
                  "y": 297.58
                },
                {
                  "x": -7.5,
                  "y": 296.52
                },
                {
                  "x": -7.5,
                  "y": 295.64
                },
                {
                  "x": -7.5,
                  "y": 295.0
                }
              ]
            }
          ]
        }
      ],
      "trafficLight": {
        "roadLinkIndices": [
          0,
          1,
          2,
          3,
          4,
          5,
          6,
          7
        ],
        "lightphases": [
          {
            "time": 5,
            "availableRoadLinks": []
          },
          {
            "time": 30,
            "availableRoadLinks": [
              0,
              4
            ]
          },
          {
            "time": 30,
            "availableRoadLinks": [
              2,
              7
            ]
          },
          {
            "time": 30,
            "availableRoadLinks": [
              1,
              5
            ]
          },
          {
            "time": 30,
            "availableRoadLinks": [
              3,
              6
            ]
          },
          {
            "time": 30,
            "availableRoadLinks": [
              0,
              1
            ]
          },
          {
            "time": 30,
            "availableRoadLinks": [
              4,
              5
            ]
          },
          {
            "time": 30,
            "availableRoadLinks": [
              2,
              3
            ]
          },
          {
            "time": 30,
            "availableRoadLinks": [
              6,
              7
            ]
          }
        ]
      },
      "virtual": false
    },
    {
      "id": "intersection_1_3",
      "point": {
        "x": 0,
        "y": 600
      },
      "width": 5,
      "roads": [
        "road_0_3_0",
        "road_1_2_1",
        "road_2_3_2",
        "road_1_4_3",
        "road_1_3_0",
        "road_1_3_1",
        "road_1_3_2",
        "road_1_3_3"
      ],
      "roadLinks": [
        {
          "type": "go_straight",
          "startRoad": "road_0_3_0",
          "endRoad": "road_1_3_0",
          "direction": 0,
          "laneLinks": [
            {
              "startLaneIndex": 1,
              "endLaneIndex": 0,
              "points": [
                {
                  "x": -5.0,
                  "y": 595.5
                },
                {
                  "x": -4.36,
                  "y": 595.584
                },
                {
                  "x": -3.48,
                  "y": 595.812
                },
                {
                  "x": -2.42,
                  "y": 596.148
                },
                {
                  "x": -1.24,
                  "y": 596.556
                },
                {
                  "x": 0.0,
                  "y": 597.0
                },
                {
                  "x": 1.24,
                  "y": 597.444
                },
                {
                  "x": 2.42,
                  "y": 597.852
                },
                {
                  "x": 3.48,
                  "y": 598.1879999999999
                },
                {
                  "x": 4.36,
                  "y": 598.4159999999999
                },
                {
                  "x": 5.0,
                  "y": 598.5
                }
              ]
            },
            {
              "startLaneIndex": 1,
              "endLaneIndex": 1,
              "points": [
                {
                  "x": -5.0,
                  "y": 595.5
                },
                {
                  "x": -4.36,
                  "y": 595.5
                },
                {
                  "x": -3.48,
                  "y": 595.5
                },
                {
                  "x": -2.42,
                  "y": 595.5
                },
                {
                  "x": -1.24,
                  "y": 595.5
                },
                {
                  "x": 0.0,
                  "y": 595.5
                },
                {
                  "x": 1.24,
                  "y": 595.5
                },
                {
                  "x": 2.42,
                  "y": 595.5
                },
                {
                  "x": 3.48,
                  "y": 595.4999999999999
                },
                {
                  "x": 4.36,
                  "y": 595.5
                },
                {
                  "x": 5.0,
                  "y": 595.5
                }
              ]
            },
            {
              "startLaneIndex": 1,
              "endLaneIndex": 2,
              "points": [
                {
                  "x": -5.0,
                  "y": 595.5
                },
                {
                  "x": -4.36,
                  "y": 595.4159999999999
                },
                {
                  "x": -3.48,
                  "y": 595.188
                },
                {
                  "x": -2.42,
                  "y": 594.852
                },
                {
                  "x": -1.24,
                  "y": 594.444
                },
                {
                  "x": 0.0,
                  "y": 594.0
                },
                {
                  "x": 1.24,
                  "y": 593.556
                },
                {
                  "x": 2.42,
                  "y": 593.148
                },
                {
                  "x": 3.48,
                  "y": 592.8119999999999
                },
                {
                  "x": 4.36,
                  "y": 592.584
                },
                {
                  "x": 5.0,
                  "y": 592.5
                }
              ]
            },
            {
              "startLaneIndex": 2,
              "endLaneIndex": 0,
              "points": [
                {
                  "x": -5.0,
                  "y": 592.5
                },
                {
                  "x": -4.36,
                  "y": 592.668
                },
                {
                  "x": -3.48,
                  "y": 593.124
                },
                {
                  "x": -2.42,
                  "y": 593.796
                },
                {
                  "x": -1.24,
                  "y": 594.612
                },
                {
                  "x": 0.0,
                  "y": 595.5
                },
                {
                  "x": 1.24,
                  "y": 596.388
                },
                {
                  "x": 2.42,
                  "y": 597.204
                },
                {
                  "x": 3.48,
                  "y": 597.8759999999999
                },
                {
                  "x": 4.36,
                  "y": 598.332
                },
                {
                  "x": 5.0,
                  "y": 598.5
                }
              ]
            },
            {
              "startLaneIndex": 2,
              "endLaneIndex": 1,
              "points": [
                {
                  "x": -5.0,
                  "y": 592.5
                },
                {
                  "x": -4.36,
                  "y": 592.584
                },
                {
                  "x": -3.48,
                  "y": 592.812
                },
                {
                  "x": -2.42,
                  "y": 593.148
                },
                {
                  "x": -1.24,
                  "y": 593.556
                },
                {
                  "x": 0.0,
                  "y": 594.0
                },
                {
                  "x": 1.24,
                  "y": 594.444
                },
                {
                  "x": 2.42,
                  "y": 594.852
                },
                {
                  "x": 3.48,
                  "y": 595.1879999999999
                },
                {
                  "x": 4.36,
                  "y": 595.4159999999999
                },
                {
                  "x": 5.0,
                  "y": 595.5
                }
              ]
            },
            {
              "startLaneIndex": 2,
              "endLaneIndex": 2,
              "points": [
                {
                  "x": -5.0,
                  "y": 592.5
                },
                {
                  "x": -4.36,
                  "y": 592.5
                },
                {
                  "x": -3.48,
                  "y": 592.5
                },
                {
                  "x": -2.42,
                  "y": 592.5
                },
                {
                  "x": -1.24,
                  "y": 592.5
                },
                {
                  "x": 0.0,
                  "y": 592.5
                },
                {
                  "x": 1.24,
                  "y": 592.5
                },
                {
                  "x": 2.42,
                  "y": 592.5
                },
                {
                  "x": 3.48,
                  "y": 592.4999999999999
                },
                {
                  "x": 4.36,
                  "y": 592.5
                },
                {
                  "x": 5.0,
                  "y": 592.5
                }
              ]
            }
          ]
        },
        {
          "type": "turn_left",
          "startRoad": "road_0_3_0",
          "endRoad": "road_1_3_1",
          "direction": 0,
          "laneLinks": [
            {
              "startLaneIndex": 0,
              "endLaneIndex": 0,
              "points": [
                {
                  "x": -5.0,
                  "y": 598.5
                },
                {
                  "x": -4.413,
                  "y": 598.637
                },
                {
                  "x": -3.684,
                  "y": 599.016
                },
                {
                  "x": -2.8609999999999998,
                  "y": 599.5889999999999
                },
                {
                  "x": -1.992,
                  "y": 600.308
                },
                {
                  "x": -1.125,
                  "y": 601.125
                },
                {
                  "x": -0.308,
                  "y": 601.992
                },
                {
                  "x": 0.411,
                  "y": 602.861
                },
                {
                  "x": 0.984,
                  "y": 603.6839999999999
                },
                {
                  "x": 1.363,
                  "y": 604.413
                },
                {
                  "x": 1.5,
                  "y": 605.0
                }
              ]
            },
            {
              "startLaneIndex": 0,
              "endLaneIndex": 1,
              "points": [
                {
                  "x": -5.0,
                  "y": 598.5
                },
                {
                  "x": -4.329,
                  "y": 598.637
                },
                {
                  "x": -3.372,
                  "y": 599.016
                },
                {
                  "x": -2.213,
                  "y": 599.5889999999999
                },
                {
                  "x": -0.9359999999999999,
                  "y": 600.308
                },
                {
                  "x": 0.375,
                  "y": 601.125
                },
                {
                  "x": 1.636,
                  "y": 601.992
                },
                {
                  "x": 2.763,
                  "y": 602.861
                },
                {
                  "x": 3.672,
                  "y": 603.6839999999999
                },
                {
                  "x": 4.279,
                  "y": 604.413
                },
                {
                  "x": 4.5,
                  "y": 605.0
                }
              ]
            },
            {
              "startLaneIndex": 0,
              "endLaneIndex": 2,
              "points": [
                {
                  "x": -5.0,
                  "y": 598.5
                },
                {
                  "x": -4.245,
                  "y": 598.637
                },
                {
                  "x": -3.06,
                  "y": 599.016
                },
                {
                  "x": -1.565,
                  "y": 599.5889999999999
                },
                {
                  "x": 0.12,
                  "y": 600.308
                },
                {
                  "x": 1.875,
                  "y": 601.125
                },
                {
                  "x": 3.58,
                  "y": 601.992
                },
                {
                  "x": 5.115,
                  "y": 602.861
                },
                {
                  "x": 6.36,
                  "y": 603.6839999999999
                },
                {
                  "x": 7.195,
                  "y": 604.413
                },
                {
                  "x": 7.5,
                  "y": 605.0
                }
              ]
            }
          ]
        },
        {
          "type": "go_straight",
          "startRoad": "road_1_2_1",
          "endRoad": "road_1_3_1",
          "direction": 1,
          "laneLinks": [
            {
              "startLaneIndex": 1,
              "endLaneIndex": 0,
              "points": [
                {
                  "x": 4.5,
                  "y": 595.0
                },
                {
                  "x": 4.416,
                  "y": 595.64
                },
                {
                  "x": 4.188,
                  "y": 596.52
                },
                {
                  "x": 3.852,
                  "y": 597.58
                },
                {
                  "x": 3.444,
                  "y": 598.76
                },
                {
                  "x": 3.0,
                  "y": 600.0
                },
                {
                  "x": 2.556,
                  "y": 601.24
                },
                {
                  "x": 2.148,
                  "y": 602.42
                },
                {
                  "x": 1.811999999999999,
                  "y": 603.4799999999999
                },
                {
                  "x": 1.584,
                  "y": 604.36
                },
                {
                  "x": 1.5,
                  "y": 605.0
                }
              ]
            },
            {
              "startLaneIndex": 1,
              "endLaneIndex": 1,
              "points": [
                {
                  "x": 4.5,
                  "y": 595.0
                },
                {
                  "x": 4.5,
                  "y": 595.64
                },
                {
                  "x": 4.5,
                  "y": 596.52
                },
                {
                  "x": 4.5,
                  "y": 597.58
                },
                {
                  "x": 4.5,
                  "y": 598.76
                },
                {
                  "x": 4.5,
                  "y": 600.0
                },
                {
                  "x": 4.5,
                  "y": 601.24
                },
                {
                  "x": 4.5,
                  "y": 602.42
                },
                {
                  "x": 4.499999999999999,
                  "y": 603.4799999999999
                },
                {
                  "x": 4.5,
                  "y": 604.36
                },
                {
                  "x": 4.5,
                  "y": 605.0
                }
              ]
            },
            {
              "startLaneIndex": 1,
              "endLaneIndex": 2,
              "points": [
                {
                  "x": 4.5,
                  "y": 595.0
                },
                {
                  "x": 4.584,
                  "y": 595.64
                },
                {
                  "x": 4.812,
                  "y": 596.52
                },
                {
                  "x": 5.148,
                  "y": 597.58
                },
                {
                  "x": 5.556,
                  "y": 598.76
                },
                {
                  "x": 6.0,
                  "y": 600.0
                },
                {
                  "x": 6.444,
                  "y": 601.24
                },
                {
                  "x": 6.852,
                  "y": 602.42
                },
                {
                  "x": 7.187999999999999,
                  "y": 603.4799999999999
                },
                {
                  "x": 7.416,
                  "y": 604.36
                },
                {
                  "x": 7.5,
                  "y": 605.0
                }
              ]
            },
            {
              "startLaneIndex": 2,
              "endLaneIndex": 0,
              "points": [
                {
                  "x": 7.5,
                  "y": 595.0
                },
                {
                  "x": 7.332,
                  "y": 595.64
                },
                {
                  "x": 6.876,
                  "y": 596.52
                },
                {
                  "x": 6.204,
                  "y": 597.58
                },
                {
                  "x": 5.388,
                  "y": 598.76
                },
                {
                  "x": 4.5,
                  "y": 600.0
                },
                {
                  "x": 3.612,
                  "y": 601.24
                },
                {
                  "x": 2.796,
                  "y": 602.42
                },
                {
                  "x": 2.124,
                  "y": 603.4799999999999
                },
                {
                  "x": 1.668,
                  "y": 604.36
                },
                {
                  "x": 1.5,
                  "y": 605.0
                }
              ]
            },
            {
              "startLaneIndex": 2,
              "endLaneIndex": 1,
              "points": [
                {
                  "x": 7.5,
                  "y": 595.0
                },
                {
                  "x": 7.416,
                  "y": 595.64
                },
                {
                  "x": 7.188,
                  "y": 596.52
                },
                {
                  "x": 6.852,
                  "y": 597.58
                },
                {
                  "x": 6.444,
                  "y": 598.76
                },
                {
                  "x": 6.0,
                  "y": 600.0
                },
                {
                  "x": 5.556,
                  "y": 601.24
                },
                {
                  "x": 5.148,
                  "y": 602.42
                },
                {
                  "x": 4.812,
                  "y": 603.4799999999999
                },
                {
                  "x": 4.584,
                  "y": 604.36
                },
                {
                  "x": 4.5,
                  "y": 605.0
                }
              ]
            },
            {
              "startLaneIndex": 2,
              "endLaneIndex": 2,
              "points": [
                {
                  "x": 7.5,
                  "y": 595.0
                },
                {
                  "x": 7.5,
                  "y": 595.64
                },
                {
                  "x": 7.5,
                  "y": 596.52
                },
                {
                  "x": 7.5,
                  "y": 597.58
                },
                {
                  "x": 7.5,
                  "y": 598.76
                },
                {
                  "x": 7.5,
                  "y": 600.0
                },
                {
                  "x": 7.5,
                  "y": 601.24
                },
                {
                  "x": 7.5,
                  "y": 602.42
                },
                {
                  "x": 7.5,
                  "y": 603.4799999999999
                },
                {
                  "x": 7.5,
                  "y": 604.36
                },
                {
                  "x": 7.5,
                  "y": 605.0
                }
              ]
            }
          ]
        },
        {
          "type": "turn_left",
          "startRoad": "road_1_2_1",
          "endRoad": "road_1_3_2",
          "direction": 1,
          "laneLinks": [
            {
              "startLaneIndex": 0,
              "endLaneIndex": 0,
              "points": [
                {
                  "x": 1.5,
                  "y": 595.0
                },
                {
                  "x": 1.363,
                  "y": 595.587
                },
                {
                  "x": 0.984,
                  "y": 596.316
                },
                {
                  "x": 0.411,
                  "y": 597.139
                },
                {
                  "x": -0.308,
                  "y": 598.008
                },
                {
                  "x": -1.125,
                  "y": 598.875
                },
                {
                  "x": -1.992,
                  "y": 599.692
                },
                {
                  "x": -2.8609999999999998,
                  "y": 600.411
                },
                {
                  "x": -3.684,
                  "y": 600.9839999999999
                },
                {
                  "x": -4.413,
                  "y": 601.363
                },
                {
                  "x": -5.0,
                  "y": 601.5
                }
              ]
            },
            {
              "startLaneIndex": 0,
              "endLaneIndex": 1,
              "points": [
                {
                  "x": 1.5,
                  "y": 595.0
                },
                {
                  "x": 1.363,
                  "y": 595.671
                },
                {
                  "x": 0.984,
                  "y": 596.628
                },
                {
                  "x": 0.411,
                  "y": 597.787
                },
                {
                  "x": -0.308,
                  "y": 599.064
                },
                {
                  "x": -1.125,
                  "y": 600.375
                },
                {
                  "x": -1.992,
                  "y": 601.636
                },
                {
                  "x": -2.8609999999999998,
                  "y": 602.763
                },
                {
                  "x": -3.684,
                  "y": 603.6719999999999
                },
                {
                  "x": -4.413,
                  "y": 604.279
                },
                {
                  "x": -5.0,
                  "y": 604.5
                }
              ]
            },
            {
              "startLaneIndex": 0,
              "endLaneIndex": 2,
              "points": [
                {
                  "x": 1.5,
                  "y": 595.0
                },
                {
                  "x": 1.363,
                  "y": 595.755
                },
                {
                  "x": 0.984,
                  "y": 596.94
                },
                {
                  "x": 0.411,
                  "y": 598.435
                },
                {
                  "x": -0.308,
                  "y": 600.12
                },
                {
                  "x": -1.125,
                  "y": 601.875
                },
                {
                  "x": -1.992,
                  "y": 603.58
                },
                {
                  "x": -2.8609999999999998,
                  "y": 605.115
                },
                {
                  "x": -3.684,
                  "y": 606.3599999999999
                },
                {
                  "x": -4.413,
                  "y": 607.1949999999999
                },
                {
                  "x": -5.0,
                  "y": 607.5
                }
              ]
            }
          ]
        },
        {
          "type": "go_straight",
          "startRoad": "road_2_3_2",
          "endRoad": "road_1_3_2",
          "direction": 2,
          "laneLinks": [
            {
              "startLaneIndex": 1,
              "endLaneIndex": 0,
              "points": [
                {
                  "x": 5.0,
                  "y": 604.5
                },
                {
                  "x": 4.36,
                  "y": 604.4159999999999
                },
                {
                  "x": 3.48,
                  "y": 604.188
                },
                {
                  "x": 2.42,
                  "y": 603.852
                },
                {
                  "x": 1.24,
                  "y": 603.444
                },
                {
                  "x": 0.0,
                  "y": 603.0
                },
                {
                  "x": -1.24,
                  "y": 602.556
                },
                {
                  "x": -2.42,
                  "y": 602.148
                },
                {
                  "x": -3.48,
                  "y": 601.8119999999999
                },
                {
                  "x": -4.36,
                  "y": 601.584
                },
                {
                  "x": -5.0,
                  "y": 601.5
                }
              ]
            },
            {
              "startLaneIndex": 1,
              "endLaneIndex": 1,
              "points": [
                {
                  "x": 5.0,
                  "y": 604.5
                },
                {
                  "x": 4.36,
                  "y": 604.5
                },
                {
                  "x": 3.48,
                  "y": 604.5
                },
                {
                  "x": 2.42,
                  "y": 604.5
                },
                {
                  "x": 1.24,
                  "y": 604.5
                },
                {
                  "x": 0.0,
                  "y": 604.5
                },
                {
                  "x": -1.24,
                  "y": 604.5
                },
                {
                  "x": -2.42,
                  "y": 604.5
                },
                {
                  "x": -3.48,
                  "y": 604.4999999999999
                },
                {
                  "x": -4.36,
                  "y": 604.5
                },
                {
                  "x": -5.0,
                  "y": 604.5
                }
              ]
            },
            {
              "startLaneIndex": 1,
              "endLaneIndex": 2,
              "points": [
                {
                  "x": 5.0,
                  "y": 604.5
                },
                {
                  "x": 4.36,
                  "y": 604.584
                },
                {
                  "x": 3.48,
                  "y": 604.812
                },
                {
                  "x": 2.42,
                  "y": 605.148
                },
                {
                  "x": 1.24,
                  "y": 605.556
                },
                {
                  "x": 0.0,
                  "y": 606.0
                },
                {
                  "x": -1.24,
                  "y": 606.444
                },
                {
                  "x": -2.42,
                  "y": 606.852
                },
                {
                  "x": -3.48,
                  "y": 607.1879999999999
                },
                {
                  "x": -4.36,
                  "y": 607.4159999999999
                },
                {
                  "x": -5.0,
                  "y": 607.5
                }
              ]
            },
            {
              "startLaneIndex": 2,
              "endLaneIndex": 0,
              "points": [
                {
                  "x": 5.0,
                  "y": 607.5
                },
                {
                  "x": 4.36,
                  "y": 607.332
                },
                {
                  "x": 3.48,
                  "y": 606.876
                },
                {
                  "x": 2.42,
                  "y": 606.204
                },
                {
                  "x": 1.24,
                  "y": 605.388
                },
                {
                  "x": 0.0,
                  "y": 604.5
                },
                {
                  "x": -1.24,
                  "y": 603.612
                },
                {
                  "x": -2.42,
                  "y": 602.796
                },
                {
                  "x": -3.48,
                  "y": 602.1239999999999
                },
                {
                  "x": -4.36,
                  "y": 601.668
                },
                {
                  "x": -5.0,
                  "y": 601.5
                }
              ]
            },
            {
              "startLaneIndex": 2,
              "endLaneIndex": 1,
              "points": [
                {
                  "x": 5.0,
                  "y": 607.5
                },
                {
                  "x": 4.36,
                  "y": 607.4159999999999
                },
                {
                  "x": 3.48,
                  "y": 607.188
                },
                {
                  "x": 2.42,
                  "y": 606.852
                },
                {
                  "x": 1.24,
                  "y": 606.444
                },
                {
                  "x": 0.0,
                  "y": 606.0
                },
                {
                  "x": -1.24,
                  "y": 605.556
                },
                {
                  "x": -2.42,
                  "y": 605.148
                },
                {
                  "x": -3.48,
                  "y": 604.8119999999999
                },
                {
                  "x": -4.36,
                  "y": 604.584
                },
                {
                  "x": -5.0,
                  "y": 604.5
                }
              ]
            },
            {
              "startLaneIndex": 2,
              "endLaneIndex": 2,
              "points": [
                {
                  "x": 5.0,
                  "y": 607.5
                },
                {
                  "x": 4.36,
                  "y": 607.5
                },
                {
                  "x": 3.48,
                  "y": 607.5
                },
                {
                  "x": 2.42,
                  "y": 607.5
                },
                {
                  "x": 1.24,
                  "y": 607.5
                },
                {
                  "x": 0.0,
                  "y": 607.5
                },
                {
                  "x": -1.24,
                  "y": 607.5
                },
                {
                  "x": -2.42,
                  "y": 607.5
                },
                {
                  "x": -3.48,
                  "y": 607.4999999999999
                },
                {
                  "x": -4.36,
                  "y": 607.5
                },
                {
                  "x": -5.0,
                  "y": 607.5
                }
              ]
            }
          ]
        },
        {
          "type": "turn_left",
          "startRoad": "road_2_3_2",
          "endRoad": "road_1_3_3",
          "direction": 2,
          "laneLinks": [
            {
              "startLaneIndex": 0,
              "endLaneIndex": 0,
              "points": [
                {
                  "x": 5.0,
                  "y": 601.5
                },
                {
                  "x": 4.413,
                  "y": 601.363
                },
                {
                  "x": 3.684,
                  "y": 600.984
                },
                {
                  "x": 2.8609999999999998,
                  "y": 600.411
                },
                {
                  "x": 1.992,
                  "y": 599.692
                },
                {
                  "x": 1.125,
                  "y": 598.875
                },
                {
                  "x": 0.308,
                  "y": 598.008
                },
                {
                  "x": -0.411,
                  "y": 597.139
                },
                {
                  "x": -0.984,
                  "y": 596.3159999999999
                },
                {
                  "x": -1.363,
                  "y": 595.587
                },
                {
                  "x": -1.5,
                  "y": 595.0
                }
              ]
            },
            {
              "startLaneIndex": 0,
              "endLaneIndex": 1,
              "points": [
                {
                  "x": 5.0,
                  "y": 601.5
                },
                {
                  "x": 4.329,
                  "y": 601.363
                },
                {
                  "x": 3.372,
                  "y": 600.984
                },
                {
                  "x": 2.213,
                  "y": 600.411
                },
                {
                  "x": 0.9359999999999999,
                  "y": 599.692
                },
                {
                  "x": -0.375,
                  "y": 598.875
                },
                {
                  "x": -1.636,
                  "y": 598.008
                },
                {
                  "x": -2.763,
                  "y": 597.139
                },
                {
                  "x": -3.672,
                  "y": 596.3159999999999
                },
                {
                  "x": -4.279,
                  "y": 595.587
                },
                {
                  "x": -4.5,
                  "y": 595.0
                }
              ]
            },
            {
              "startLaneIndex": 0,
              "endLaneIndex": 2,
              "points": [
                {
                  "x": 5.0,
                  "y": 601.5
                },
                {
                  "x": 4.245,
                  "y": 601.363
                },
                {
                  "x": 3.06,
                  "y": 600.984
                },
                {
                  "x": 1.565,
                  "y": 600.411
                },
                {
                  "x": -0.12,
                  "y": 599.692
                },
                {
                  "x": -1.875,
                  "y": 598.875
                },
                {
                  "x": -3.58,
                  "y": 598.008
                },
                {
                  "x": -5.115,
                  "y": 597.139
                },
                {
                  "x": -6.36,
                  "y": 596.3159999999999
                },
                {
                  "x": -7.195,
                  "y": 595.587
                },
                {
                  "x": -7.5,
                  "y": 595.0
                }
              ]
            }
          ]
        },
        {
          "type": "turn_left",
          "startRoad": "road_1_4_3",
          "endRoad": "road_1_3_0",
          "direction": 3,
          "laneLinks": [
            {
              "startLaneIndex": 0,
              "endLaneIndex": 0,
              "points": [
                {
                  "x": -1.5,
                  "y": 605.0
                },
                {
                  "x": -1.363,
                  "y": 604.413
                },
                {
                  "x": -0.984,
                  "y": 603.684
                },
                {
                  "x": -0.411,
                  "y": 602.861
                },
                {
                  "x": 0.308,
                  "y": 601.992
                },
                {
                  "x": 1.125,
                  "y": 601.125
                },
                {
                  "x": 1.992,
                  "y": 600.308
                },
                {
                  "x": 2.8609999999999998,
                  "y": 599.5889999999999
                },
                {
                  "x": 3.684,
                  "y": 599.0159999999998
                },
                {
                  "x": 4.413,
                  "y": 598.637
                },
                {
                  "x": 5.0,
                  "y": 598.5
                }
              ]
            },
            {
              "startLaneIndex": 0,
              "endLaneIndex": 1,
              "points": [
                {
                  "x": -1.5,
                  "y": 605.0
                },
                {
                  "x": -1.363,
                  "y": 604.329
                },
                {
                  "x": -0.984,
                  "y": 603.372
                },
                {
                  "x": -0.411,
                  "y": 602.213
                },
                {
                  "x": 0.308,
                  "y": 600.936
                },
                {
                  "x": 1.125,
                  "y": 599.625
                },
                {
                  "x": 1.992,
                  "y": 598.364
                },
                {
                  "x": 2.8609999999999998,
                  "y": 597.237
                },
                {
                  "x": 3.684,
                  "y": 596.3279999999999
                },
                {
                  "x": 4.413,
                  "y": 595.721
                },
                {
                  "x": 5.0,
                  "y": 595.5
                }
              ]
            },
            {
              "startLaneIndex": 0,
              "endLaneIndex": 2,
              "points": [
                {
                  "x": -1.5,
                  "y": 605.0
                },
                {
                  "x": -1.363,
                  "y": 604.245
                },
                {
                  "x": -0.984,
                  "y": 603.06
                },
                {
                  "x": -0.411,
                  "y": 601.565
                },
                {
                  "x": 0.308,
                  "y": 599.88
                },
                {
                  "x": 1.125,
                  "y": 598.125
                },
                {
                  "x": 1.992,
                  "y": 596.42
                },
                {
                  "x": 2.8609999999999998,
                  "y": 594.885
                },
                {
                  "x": 3.684,
                  "y": 593.6399999999999
                },
                {
                  "x": 4.413,
                  "y": 592.805
                },
                {
                  "x": 5.0,
                  "y": 592.5
                }
              ]
            }
          ]
        },
        {
          "type": "go_straight",
          "startRoad": "road_1_4_3",
          "endRoad": "road_1_3_3",
          "direction": 3,
          "laneLinks": [
            {
              "startLaneIndex": 1,
              "endLaneIndex": 0,
              "points": [
                {
                  "x": -4.5,
                  "y": 605.0
                },
                {
                  "x": -4.416,
                  "y": 604.36
                },
                {
                  "x": -4.188,
                  "y": 603.48
                },
                {
                  "x": -3.852,
                  "y": 602.42
                },
                {
                  "x": -3.444,
                  "y": 601.24
                },
                {
                  "x": -3.0,
                  "y": 600.0
                },
                {
                  "x": -2.556,
                  "y": 598.76
                },
                {
                  "x": -2.148,
                  "y": 597.58
                },
                {
                  "x": -1.811999999999999,
                  "y": 596.5199999999999
                },
                {
                  "x": -1.584,
                  "y": 595.64
                },
                {
                  "x": -1.5,
                  "y": 595.0
                }
              ]
            },
            {
              "startLaneIndex": 1,
              "endLaneIndex": 1,
              "points": [
                {
                  "x": -4.5,
                  "y": 605.0
                },
                {
                  "x": -4.5,
                  "y": 604.36
                },
                {
                  "x": -4.5,
                  "y": 603.48
                },
                {
                  "x": -4.5,
                  "y": 602.42
                },
                {
                  "x": -4.5,
                  "y": 601.24
                },
                {
                  "x": -4.5,
                  "y": 600.0
                },
                {
                  "x": -4.5,
                  "y": 598.76
                },
                {
                  "x": -4.5,
                  "y": 597.58
                },
                {
                  "x": -4.499999999999999,
                  "y": 596.5199999999999
                },
                {
                  "x": -4.5,
                  "y": 595.64
                },
                {
                  "x": -4.5,
                  "y": 595.0
                }
              ]
            },
            {
              "startLaneIndex": 1,
              "endLaneIndex": 2,
              "points": [
                {
                  "x": -4.5,
                  "y": 605.0
                },
                {
                  "x": -4.584,
                  "y": 604.36
                },
                {
                  "x": -4.812,
                  "y": 603.48
                },
                {
                  "x": -5.148,
                  "y": 602.42
                },
                {
                  "x": -5.556,
                  "y": 601.24
                },
                {
                  "x": -6.0,
                  "y": 600.0
                },
                {
                  "x": -6.444,
                  "y": 598.76
                },
                {
                  "x": -6.852,
                  "y": 597.58
                },
                {
                  "x": -7.187999999999999,
                  "y": 596.5199999999999
                },
                {
                  "x": -7.416,
                  "y": 595.64
                },
                {
                  "x": -7.5,
                  "y": 595.0
                }
              ]
            },
            {
              "startLaneIndex": 2,
              "endLaneIndex": 0,
              "points": [
                {
                  "x": -7.5,
                  "y": 605.0
                },
                {
                  "x": -7.332,
                  "y": 604.36
                },
                {
                  "x": -6.876,
                  "y": 603.48
                },
                {
                  "x": -6.204,
                  "y": 602.42
                },
                {
                  "x": -5.388,
                  "y": 601.24
                },
                {
                  "x": -4.5,
                  "y": 600.0
                },
                {
                  "x": -3.612,
                  "y": 598.76
                },
                {
                  "x": -2.796,
                  "y": 597.58
                },
                {
                  "x": -2.124,
                  "y": 596.5199999999999
                },
                {
                  "x": -1.668,
                  "y": 595.64
                },
                {
                  "x": -1.5,
                  "y": 595.0
                }
              ]
            },
            {
              "startLaneIndex": 2,
              "endLaneIndex": 1,
              "points": [
                {
                  "x": -7.5,
                  "y": 605.0
                },
                {
                  "x": -7.416,
                  "y": 604.36
                },
                {
                  "x": -7.188,
                  "y": 603.48
                },
                {
                  "x": -6.852,
                  "y": 602.42
                },
                {
                  "x": -6.444,
                  "y": 601.24
                },
                {
                  "x": -6.0,
                  "y": 600.0
                },
                {
                  "x": -5.556,
                  "y": 598.76
                },
                {
                  "x": -5.148,
                  "y": 597.58
                },
                {
                  "x": -4.812,
                  "y": 596.5199999999999
                },
                {
                  "x": -4.584,
                  "y": 595.64
                },
                {
                  "x": -4.5,
                  "y": 595.0
                }
              ]
            },
            {
              "startLaneIndex": 2,
              "endLaneIndex": 2,
              "points": [
                {
                  "x": -7.5,
                  "y": 605.0
                },
                {
                  "x": -7.5,
                  "y": 604.36
                },
                {
                  "x": -7.5,
                  "y": 603.48
                },
                {
                  "x": -7.5,
                  "y": 602.42
                },
                {
                  "x": -7.5,
                  "y": 601.24
                },
                {
                  "x": -7.5,
                  "y": 600.0
                },
                {
                  "x": -7.5,
                  "y": 598.76
                },
                {
                  "x": -7.5,
                  "y": 597.58
                },
                {
                  "x": -7.5,
                  "y": 596.5199999999999
                },
                {
                  "x": -7.5,
                  "y": 595.64
                },
                {
                  "x": -7.5,
                  "y": 595.0
                }
              ]
            }
          ]
        }
      ],
      "trafficLight": {
        "roadLinkIndices": [
          0,
          1,
          2,
          3,
          4,
          5,
          6,
          7
        ],
        "lightphases": [
          {
            "time": 5,
            "availableRoadLinks": []
          },
          {
            "time": 30,
            "availableRoadLinks": [
              0,
              4
            ]
          },
          {
            "time": 30,
            "availableRoadLinks": [
              2,
              7
            ]
          },
          {
            "time": 30,
            "availableRoadLinks": [
              1,
              5
            ]
          },
          {
            "time": 30,
            "availableRoadLinks": [
              3,
              6
            ]
          },
          {
            "time": 30,
            "availableRoadLinks": [
              0,
              1
            ]
          },
          {
            "time": 30,
            "availableRoadLinks": [
              4,
              5
            ]
          },
          {
            "time": 30,
            "availableRoadLinks": [
              2,
              3
            ]
          },
          {
            "time": 30,
            "availableRoadLinks": [
              6,
              7
            ]
          }
        ]
      },
      "virtual": false
    },
    {
      "id": "intersection_1_4",
      "point": {
        "x": 0,
        "y": 900
      },
      "width": 0,
      "roads": [
        "road_1_3_1",
        "road_1_4_3"
      ],
      "roadLinks": [],
      "trafficLight": {
        "roadLinkIndices": [],
        "lightphases": [
          {
            "time": 5,
            "availableRoadLinks": []
          },
          {
            "time": 30,
            "availableRoadLinks": []
          },
          {
            "time": 30,
            "availableRoadLinks": []
          },
          {
            "time": 30,
            "availableRoadLinks": []
          },
          {
            "time": 30,
            "availableRoadLinks": []
          },
          {
            "time": 30,
            "availableRoadLinks": []
          },
          {
            "time": 30,
            "availableRoadLinks": []
          },
          {
            "time": 30,
            "availableRoadLinks": []
          },
          {
            "time": 30,
            "availableRoadLinks": []
          }
        ]
      },
      "virtual": true
    },
    {
      "id": "intersection_2_0",
      "point": {
        "x": 300,
        "y": -300
      },
      "width": 0,
      "roads": [
        "road_2_1_3",
        "road_2_0_1"
      ],
      "roadLinks": [],
      "trafficLight": {
        "roadLinkIndices": [],
        "lightphases": [
          {
            "time": 5,
            "availableRoadLinks": []
          },
          {
            "time": 30,
            "availableRoadLinks": []
          },
          {
            "time": 30,
            "availableRoadLinks": []
          },
          {
            "time": 30,
            "availableRoadLinks": []
          },
          {
            "time": 30,
            "availableRoadLinks": []
          },
          {
            "time": 30,
            "availableRoadLinks": []
          },
          {
            "time": 30,
            "availableRoadLinks": []
          },
          {
            "time": 30,
            "availableRoadLinks": []
          },
          {
            "time": 30,
            "availableRoadLinks": []
          }
        ]
      },
      "virtual": true
    },
    {
      "id": "intersection_2_1",
      "point": {
        "x": 300,
        "y": 0
      },
      "width": 5,
      "roads": [
        "road_1_1_0",
        "road_2_0_1",
        "road_3_1_2",
        "road_2_2_3",
        "road_2_1_0",
        "road_2_1_1",
        "road_2_1_2",
        "road_2_1_3"
      ],
      "roadLinks": [
        {
          "type": "go_straight",
          "startRoad": "road_1_1_0",
          "endRoad": "road_2_1_0",
          "direction": 0,
          "laneLinks": [
            {
              "startLaneIndex": 1,
              "endLaneIndex": 0,
              "points": [
                {
                  "x": 295.0,
                  "y": -4.5
                },
                {
                  "x": 295.64,
                  "y": -4.416
                },
                {
                  "x": 296.52,
                  "y": -4.188
                },
                {
                  "x": 297.58,
                  "y": -3.852
                },
                {
                  "x": 298.76,
                  "y": -3.444
                },
                {
                  "x": 300.0,
                  "y": -3.0
                },
                {
                  "x": 301.24,
                  "y": -2.556
                },
                {
                  "x": 302.42,
                  "y": -2.148
                },
                {
                  "x": 303.48,
                  "y": -1.811999999999999
                },
                {
                  "x": 304.36,
                  "y": -1.584
                },
                {
                  "x": 305.0,
                  "y": -1.5
                }
              ]
            },
            {
              "startLaneIndex": 1,
              "endLaneIndex": 1,
              "points": [
                {
                  "x": 295.0,
                  "y": -4.5
                },
                {
                  "x": 295.64,
                  "y": -4.5
                },
                {
                  "x": 296.52,
                  "y": -4.5
                },
                {
                  "x": 297.58,
                  "y": -4.5
                },
                {
                  "x": 298.76,
                  "y": -4.5
                },
                {
                  "x": 300.0,
                  "y": -4.5
                },
                {
                  "x": 301.24,
                  "y": -4.5
                },
                {
                  "x": 302.42,
                  "y": -4.5
                },
                {
                  "x": 303.48,
                  "y": -4.499999999999999
                },
                {
                  "x": 304.36,
                  "y": -4.5
                },
                {
                  "x": 305.0,
                  "y": -4.5
                }
              ]
            },
            {
              "startLaneIndex": 1,
              "endLaneIndex": 2,
              "points": [
                {
                  "x": 295.0,
                  "y": -4.5
                },
                {
                  "x": 295.64,
                  "y": -4.584
                },
                {
                  "x": 296.52,
                  "y": -4.812
                },
                {
                  "x": 297.58,
                  "y": -5.148
                },
                {
                  "x": 298.76,
                  "y": -5.556
                },
                {
                  "x": 300.0,
                  "y": -6.0
                },
                {
                  "x": 301.24,
                  "y": -6.444
                },
                {
                  "x": 302.42,
                  "y": -6.852
                },
                {
                  "x": 303.48,
                  "y": -7.187999999999999
                },
                {
                  "x": 304.36,
                  "y": -7.416
                },
                {
                  "x": 305.0,
                  "y": -7.5
                }
              ]
            },
            {
              "startLaneIndex": 2,
              "endLaneIndex": 0,
              "points": [
                {
                  "x": 295.0,
                  "y": -7.5
                },
                {
                  "x": 295.64,
                  "y": -7.332
                },
                {
                  "x": 296.52,
                  "y": -6.876
                },
                {
                  "x": 297.58,
                  "y": -6.204
                },
                {
                  "x": 298.76,
                  "y": -5.388
                },
                {
                  "x": 300.0,
                  "y": -4.5
                },
                {
                  "x": 301.24,
                  "y": -3.612
                },
                {
                  "x": 302.42,
                  "y": -2.796
                },
                {
                  "x": 303.48,
                  "y": -2.124
                },
                {
                  "x": 304.36,
                  "y": -1.668
                },
                {
                  "x": 305.0,
                  "y": -1.5
                }
              ]
            },
            {
              "startLaneIndex": 2,
              "endLaneIndex": 1,
              "points": [
                {
                  "x": 295.0,
                  "y": -7.5
                },
                {
                  "x": 295.64,
                  "y": -7.416
                },
                {
                  "x": 296.52,
                  "y": -7.188
                },
                {
                  "x": 297.58,
                  "y": -6.852
                },
                {
                  "x": 298.76,
                  "y": -6.444
                },
                {
                  "x": 300.0,
                  "y": -6.0
                },
                {
                  "x": 301.24,
                  "y": -5.556
                },
                {
                  "x": 302.42,
                  "y": -5.148
                },
                {
                  "x": 303.48,
                  "y": -4.812
                },
                {
                  "x": 304.36,
                  "y": -4.584
                },
                {
                  "x": 305.0,
                  "y": -4.5
                }
              ]
            },
            {
              "startLaneIndex": 2,
              "endLaneIndex": 2,
              "points": [
                {
                  "x": 295.0,
                  "y": -7.5
                },
                {
                  "x": 295.64,
                  "y": -7.5
                },
                {
                  "x": 296.52,
                  "y": -7.5
                },
                {
                  "x": 297.58,
                  "y": -7.5
                },
                {
                  "x": 298.76,
                  "y": -7.5
                },
                {
                  "x": 300.0,
                  "y": -7.5
                },
                {
                  "x": 301.24,
                  "y": -7.5
                },
                {
                  "x": 302.42,
                  "y": -7.5
                },
                {
                  "x": 303.48,
                  "y": -7.5
                },
                {
                  "x": 304.36,
                  "y": -7.5
                },
                {
                  "x": 305.0,
                  "y": -7.5
                }
              ]
            }
          ]
        },
        {
          "type": "turn_left",
          "startRoad": "road_1_1_0",
          "endRoad": "road_2_1_1",
          "direction": 0,
          "laneLinks": [
            {
              "startLaneIndex": 0,
              "endLaneIndex": 0,
              "points": [
                {
                  "x": 295.0,
                  "y": -1.5
                },
                {
                  "x": 295.587,
                  "y": -1.363
                },
                {
                  "x": 296.316,
                  "y": -0.984
                },
                {
                  "x": 297.139,
                  "y": -0.411
                },
                {
                  "x": 298.008,
                  "y": 0.308
                },
                {
                  "x": 298.875,
                  "y": 1.125
                },
                {
                  "x": 299.692,
                  "y": 1.992
                },
                {
                  "x": 300.411,
                  "y": 2.8609999999999998
                },
                {
                  "x": 300.984,
                  "y": 3.684
                },
                {
                  "x": 301.363,
                  "y": 4.413
                },
                {
                  "x": 301.5,
                  "y": 5.0
                }
              ]
            },
            {
              "startLaneIndex": 0,
              "endLaneIndex": 1,
              "points": [
                {
                  "x": 295.0,
                  "y": -1.5
                },
                {
                  "x": 295.671,
                  "y": -1.363
                },
                {
                  "x": 296.628,
                  "y": -0.984
                },
                {
                  "x": 297.787,
                  "y": -0.411
                },
                {
                  "x": 299.064,
                  "y": 0.308
                },
                {
                  "x": 300.375,
                  "y": 1.125
                },
                {
                  "x": 301.636,
                  "y": 1.992
                },
                {
                  "x": 302.763,
                  "y": 2.8609999999999998
                },
                {
                  "x": 303.672,
                  "y": 3.684
                },
                {
                  "x": 304.279,
                  "y": 4.413
                },
                {
                  "x": 304.5,
                  "y": 5.0
                }
              ]
            },
            {
              "startLaneIndex": 0,
              "endLaneIndex": 2,
              "points": [
                {
                  "x": 295.0,
                  "y": -1.5
                },
                {
                  "x": 295.755,
                  "y": -1.363
                },
                {
                  "x": 296.94,
                  "y": -0.984
                },
                {
                  "x": 298.435,
                  "y": -0.411
                },
                {
                  "x": 300.12,
                  "y": 0.308
                },
                {
                  "x": 301.875,
                  "y": 1.125
                },
                {
                  "x": 303.58,
                  "y": 1.992
                },
                {
                  "x": 305.115,
                  "y": 2.8609999999999998
                },
                {
                  "x": 306.36,
                  "y": 3.684
                },
                {
                  "x": 307.195,
                  "y": 4.413
                },
                {
                  "x": 307.5,
                  "y": 5.0
                }
              ]
            }
          ]
        },
        {
          "type": "go_straight",
          "startRoad": "road_2_0_1",
          "endRoad": "road_2_1_1",
          "direction": 1,
          "laneLinks": [
            {
              "startLaneIndex": 1,
              "endLaneIndex": 0,
              "points": [
                {
                  "x": 304.5,
                  "y": -5.0
                },
                {
                  "x": 304.416,
                  "y": -4.36
                },
                {
                  "x": 304.188,
                  "y": -3.48
                },
                {
                  "x": 303.852,
                  "y": -2.42
                },
                {
                  "x": 303.444,
                  "y": -1.24
                },
                {
                  "x": 303.0,
                  "y": 0.0
                },
                {
                  "x": 302.556,
                  "y": 1.24
                },
                {
                  "x": 302.148,
                  "y": 2.42
                },
                {
                  "x": 301.812,
                  "y": 3.48
                },
                {
                  "x": 301.584,
                  "y": 4.36
                },
                {
                  "x": 301.5,
                  "y": 5.0
                }
              ]
            },
            {
              "startLaneIndex": 1,
              "endLaneIndex": 1,
              "points": [
                {
                  "x": 304.5,
                  "y": -5.0
                },
                {
                  "x": 304.5,
                  "y": -4.36
                },
                {
                  "x": 304.5,
                  "y": -3.48
                },
                {
                  "x": 304.5,
                  "y": -2.42
                },
                {
                  "x": 304.5,
                  "y": -1.24
                },
                {
                  "x": 304.5,
                  "y": 0.0
                },
                {
                  "x": 304.5,
                  "y": 1.24
                },
                {
                  "x": 304.5,
                  "y": 2.42
                },
                {
                  "x": 304.5,
                  "y": 3.48
                },
                {
                  "x": 304.5,
                  "y": 4.36
                },
                {
                  "x": 304.5,
                  "y": 5.0
                }
              ]
            },
            {
              "startLaneIndex": 1,
              "endLaneIndex": 2,
              "points": [
                {
                  "x": 304.5,
                  "y": -5.0
                },
                {
                  "x": 304.584,
                  "y": -4.36
                },
                {
                  "x": 304.812,
                  "y": -3.48
                },
                {
                  "x": 305.148,
                  "y": -2.42
                },
                {
                  "x": 305.556,
                  "y": -1.24
                },
                {
                  "x": 306.0,
                  "y": 0.0
                },
                {
                  "x": 306.444,
                  "y": 1.24
                },
                {
                  "x": 306.852,
                  "y": 2.42
                },
                {
                  "x": 307.188,
                  "y": 3.48
                },
                {
                  "x": 307.416,
                  "y": 4.36
                },
                {
                  "x": 307.5,
                  "y": 5.0
                }
              ]
            },
            {
              "startLaneIndex": 2,
              "endLaneIndex": 0,
              "points": [
                {
                  "x": 307.5,
                  "y": -5.0
                },
                {
                  "x": 307.332,
                  "y": -4.36
                },
                {
                  "x": 306.876,
                  "y": -3.48
                },
                {
                  "x": 306.204,
                  "y": -2.42
                },
                {
                  "x": 305.388,
                  "y": -1.24
                },
                {
                  "x": 304.5,
                  "y": 0.0
                },
                {
                  "x": 303.612,
                  "y": 1.24
                },
                {
                  "x": 302.796,
                  "y": 2.42
                },
                {
                  "x": 302.124,
                  "y": 3.48
                },
                {
                  "x": 301.668,
                  "y": 4.36
                },
                {
                  "x": 301.5,
                  "y": 5.0
                }
              ]
            },
            {
              "startLaneIndex": 2,
              "endLaneIndex": 1,
              "points": [
                {
                  "x": 307.5,
                  "y": -5.0
                },
                {
                  "x": 307.416,
                  "y": -4.36
                },
                {
                  "x": 307.188,
                  "y": -3.48
                },
                {
                  "x": 306.852,
                  "y": -2.42
                },
                {
                  "x": 306.444,
                  "y": -1.24
                },
                {
                  "x": 306.0,
                  "y": 0.0
                },
                {
                  "x": 305.556,
                  "y": 1.24
                },
                {
                  "x": 305.148,
                  "y": 2.42
                },
                {
                  "x": 304.812,
                  "y": 3.48
                },
                {
                  "x": 304.584,
                  "y": 4.36
                },
                {
                  "x": 304.5,
                  "y": 5.0
                }
              ]
            },
            {
              "startLaneIndex": 2,
              "endLaneIndex": 2,
              "points": [
                {
                  "x": 307.5,
                  "y": -5.0
                },
                {
                  "x": 307.5,
                  "y": -4.36
                },
                {
                  "x": 307.5,
                  "y": -3.48
                },
                {
                  "x": 307.5,
                  "y": -2.42
                },
                {
                  "x": 307.5,
                  "y": -1.24
                },
                {
                  "x": 307.5,
                  "y": 0.0
                },
                {
                  "x": 307.5,
                  "y": 1.24
                },
                {
                  "x": 307.5,
                  "y": 2.42
                },
                {
                  "x": 307.5,
                  "y": 3.48
                },
                {
                  "x": 307.5,
                  "y": 4.36
                },
                {
                  "x": 307.5,
                  "y": 5.0
                }
              ]
            }
          ]
        },
        {
          "type": "turn_left",
          "startRoad": "road_2_0_1",
          "endRoad": "road_2_1_2",
          "direction": 1,
          "laneLinks": [
            {
              "startLaneIndex": 0,
              "endLaneIndex": 0,
              "points": [
                {
                  "x": 301.5,
                  "y": -5.0
                },
                {
                  "x": 301.363,
                  "y": -4.413
                },
                {
                  "x": 300.984,
                  "y": -3.684
                },
                {
                  "x": 300.411,
                  "y": -2.8609999999999998
                },
                {
                  "x": 299.692,
                  "y": -1.992
                },
                {
                  "x": 298.875,
                  "y": -1.125
                },
                {
                  "x": 298.008,
                  "y": -0.308
                },
                {
                  "x": 297.139,
                  "y": 0.411
                },
                {
                  "x": 296.316,
                  "y": 0.984
                },
                {
                  "x": 295.587,
                  "y": 1.363
                },
                {
                  "x": 295.0,
                  "y": 1.5
                }
              ]
            },
            {
              "startLaneIndex": 0,
              "endLaneIndex": 1,
              "points": [
                {
                  "x": 301.5,
                  "y": -5.0
                },
                {
                  "x": 301.363,
                  "y": -4.329
                },
                {
                  "x": 300.984,
                  "y": -3.372
                },
                {
                  "x": 300.411,
                  "y": -2.213
                },
                {
                  "x": 299.692,
                  "y": -0.9359999999999999
                },
                {
                  "x": 298.875,
                  "y": 0.375
                },
                {
                  "x": 298.008,
                  "y": 1.636
                },
                {
                  "x": 297.139,
                  "y": 2.763
                },
                {
                  "x": 296.316,
                  "y": 3.672
                },
                {
                  "x": 295.587,
                  "y": 4.279
                },
                {
                  "x": 295.0,
                  "y": 4.5
                }
              ]
            },
            {
              "startLaneIndex": 0,
              "endLaneIndex": 2,
              "points": [
                {
                  "x": 301.5,
                  "y": -5.0
                },
                {
                  "x": 301.363,
                  "y": -4.245
                },
                {
                  "x": 300.984,
                  "y": -3.06
                },
                {
                  "x": 300.411,
                  "y": -1.565
                },
                {
                  "x": 299.692,
                  "y": 0.12
                },
                {
                  "x": 298.875,
                  "y": 1.875
                },
                {
                  "x": 298.008,
                  "y": 3.58
                },
                {
                  "x": 297.139,
                  "y": 5.115
                },
                {
                  "x": 296.316,
                  "y": 6.36
                },
                {
                  "x": 295.587,
                  "y": 7.195
                },
                {
                  "x": 295.0,
                  "y": 7.5
                }
              ]
            }
          ]
        },
        {
          "type": "go_straight",
          "startRoad": "road_3_1_2",
          "endRoad": "road_2_1_2",
          "direction": 2,
          "laneLinks": [
            {
              "startLaneIndex": 1,
              "endLaneIndex": 0,
              "points": [
                {
                  "x": 305.0,
                  "y": 4.5
                },
                {
                  "x": 304.36,
                  "y": 4.416
                },
                {
                  "x": 303.48,
                  "y": 4.188
                },
                {
                  "x": 302.42,
                  "y": 3.852
                },
                {
                  "x": 301.24,
                  "y": 3.444
                },
                {
                  "x": 300.0,
                  "y": 3.0
                },
                {
                  "x": 298.76,
                  "y": 2.556
                },
                {
                  "x": 297.58,
                  "y": 2.148
                },
                {
                  "x": 296.52,
                  "y": 1.811999999999999
                },
                {
                  "x": 295.64,
                  "y": 1.584
                },
                {
                  "x": 295.0,
                  "y": 1.5
                }
              ]
            },
            {
              "startLaneIndex": 1,
              "endLaneIndex": 1,
              "points": [
                {
                  "x": 305.0,
                  "y": 4.5
                },
                {
                  "x": 304.36,
                  "y": 4.5
                },
                {
                  "x": 303.48,
                  "y": 4.5
                },
                {
                  "x": 302.42,
                  "y": 4.5
                },
                {
                  "x": 301.24,
                  "y": 4.5
                },
                {
                  "x": 300.0,
                  "y": 4.5
                },
                {
                  "x": 298.76,
                  "y": 4.5
                },
                {
                  "x": 297.58,
                  "y": 4.5
                },
                {
                  "x": 296.52,
                  "y": 4.499999999999999
                },
                {
                  "x": 295.64,
                  "y": 4.5
                },
                {
                  "x": 295.0,
                  "y": 4.5
                }
              ]
            },
            {
              "startLaneIndex": 1,
              "endLaneIndex": 2,
              "points": [
                {
                  "x": 305.0,
                  "y": 4.5
                },
                {
                  "x": 304.36,
                  "y": 4.584
                },
                {
                  "x": 303.48,
                  "y": 4.812
                },
                {
                  "x": 302.42,
                  "y": 5.148
                },
                {
                  "x": 301.24,
                  "y": 5.556
                },
                {
                  "x": 300.0,
                  "y": 6.0
                },
                {
                  "x": 298.76,
                  "y": 6.444
                },
                {
                  "x": 297.58,
                  "y": 6.852
                },
                {
                  "x": 296.52,
                  "y": 7.187999999999999
                },
                {
                  "x": 295.64,
                  "y": 7.416
                },
                {
                  "x": 295.0,
                  "y": 7.5
                }
              ]
            },
            {
              "startLaneIndex": 2,
              "endLaneIndex": 0,
              "points": [
                {
                  "x": 305.0,
                  "y": 7.5
                },
                {
                  "x": 304.36,
                  "y": 7.332
                },
                {
                  "x": 303.48,
                  "y": 6.876
                },
                {
                  "x": 302.42,
                  "y": 6.204
                },
                {
                  "x": 301.24,
                  "y": 5.388
                },
                {
                  "x": 300.0,
                  "y": 4.5
                },
                {
                  "x": 298.76,
                  "y": 3.612
                },
                {
                  "x": 297.58,
                  "y": 2.796
                },
                {
                  "x": 296.52,
                  "y": 2.124
                },
                {
                  "x": 295.64,
                  "y": 1.668
                },
                {
                  "x": 295.0,
                  "y": 1.5
                }
              ]
            },
            {
              "startLaneIndex": 2,
              "endLaneIndex": 1,
              "points": [
                {
                  "x": 305.0,
                  "y": 7.5
                },
                {
                  "x": 304.36,
                  "y": 7.416
                },
                {
                  "x": 303.48,
                  "y": 7.188
                },
                {
                  "x": 302.42,
                  "y": 6.852
                },
                {
                  "x": 301.24,
                  "y": 6.444
                },
                {
                  "x": 300.0,
                  "y": 6.0
                },
                {
                  "x": 298.76,
                  "y": 5.556
                },
                {
                  "x": 297.58,
                  "y": 5.148
                },
                {
                  "x": 296.52,
                  "y": 4.812
                },
                {
                  "x": 295.64,
                  "y": 4.584
                },
                {
                  "x": 295.0,
                  "y": 4.5
                }
              ]
            },
            {
              "startLaneIndex": 2,
              "endLaneIndex": 2,
              "points": [
                {
                  "x": 305.0,
                  "y": 7.5
                },
                {
                  "x": 304.36,
                  "y": 7.5
                },
                {
                  "x": 303.48,
                  "y": 7.5
                },
                {
                  "x": 302.42,
                  "y": 7.5
                },
                {
                  "x": 301.24,
                  "y": 7.5
                },
                {
                  "x": 300.0,
                  "y": 7.5
                },
                {
                  "x": 298.76,
                  "y": 7.5
                },
                {
                  "x": 297.58,
                  "y": 7.5
                },
                {
                  "x": 296.52,
                  "y": 7.5
                },
                {
                  "x": 295.64,
                  "y": 7.5
                },
                {
                  "x": 295.0,
                  "y": 7.5
                }
              ]
            }
          ]
        },
        {
          "type": "turn_left",
          "startRoad": "road_3_1_2",
          "endRoad": "road_2_1_3",
          "direction": 2,
          "laneLinks": [
            {
              "startLaneIndex": 0,
              "endLaneIndex": 0,
              "points": [
                {
                  "x": 305.0,
                  "y": 1.5
                },
                {
                  "x": 304.413,
                  "y": 1.363
                },
                {
                  "x": 303.68399999999997,
                  "y": 0.984
                },
                {
                  "x": 302.861,
                  "y": 0.411
                },
                {
                  "x": 301.992,
                  "y": -0.308
                },
                {
                  "x": 301.125,
                  "y": -1.125
                },
                {
                  "x": 300.308,
                  "y": -1.992
                },
                {
                  "x": 299.589,
                  "y": -2.8609999999999998
                },
                {
                  "x": 299.016,
                  "y": -3.684
                },
                {
                  "x": 298.637,
                  "y": -4.413
                },
                {
                  "x": 298.5,
                  "y": -5.0
                }
              ]
            },
            {
              "startLaneIndex": 0,
              "endLaneIndex": 1,
              "points": [
                {
                  "x": 305.0,
                  "y": 1.5
                },
                {
                  "x": 304.329,
                  "y": 1.363
                },
                {
                  "x": 303.372,
                  "y": 0.984
                },
                {
                  "x": 302.213,
                  "y": 0.411
                },
                {
                  "x": 300.936,
                  "y": -0.308
                },
                {
                  "x": 299.625,
                  "y": -1.125
                },
                {
                  "x": 298.364,
                  "y": -1.992
                },
                {
                  "x": 297.237,
                  "y": -2.8609999999999998
                },
                {
                  "x": 296.328,
                  "y": -3.684
                },
                {
                  "x": 295.721,
                  "y": -4.413
                },
                {
                  "x": 295.5,
                  "y": -5.0
                }
              ]
            },
            {
              "startLaneIndex": 0,
              "endLaneIndex": 2,
              "points": [
                {
                  "x": 305.0,
                  "y": 1.5
                },
                {
                  "x": 304.245,
                  "y": 1.363
                },
                {
                  "x": 303.06,
                  "y": 0.984
                },
                {
                  "x": 301.565,
                  "y": 0.411
                },
                {
                  "x": 299.88,
                  "y": -0.308
                },
                {
                  "x": 298.125,
                  "y": -1.125
                },
                {
                  "x": 296.42,
                  "y": -1.992
                },
                {
                  "x": 294.885,
                  "y": -2.8609999999999998
                },
                {
                  "x": 293.64,
                  "y": -3.684
                },
                {
                  "x": 292.805,
                  "y": -4.413
                },
                {
                  "x": 292.5,
                  "y": -5.0
                }
              ]
            }
          ]
        },
        {
          "type": "turn_left",
          "startRoad": "road_2_2_3",
          "endRoad": "road_2_1_0",
          "direction": 3,
          "laneLinks": [
            {
              "startLaneIndex": 0,
              "endLaneIndex": 0,
              "points": [
                {
                  "x": 298.5,
                  "y": 5.0
                },
                {
                  "x": 298.637,
                  "y": 4.413
                },
                {
                  "x": 299.016,
                  "y": 3.684
                },
                {
                  "x": 299.589,
                  "y": 2.8609999999999998
                },
                {
                  "x": 300.308,
                  "y": 1.992
                },
                {
                  "x": 301.125,
                  "y": 1.125
                },
                {
                  "x": 301.992,
                  "y": 0.308
                },
                {
                  "x": 302.861,
                  "y": -0.411
                },
                {
                  "x": 303.68399999999997,
                  "y": -0.984
                },
                {
                  "x": 304.413,
                  "y": -1.363
                },
                {
                  "x": 305.0,
                  "y": -1.5
                }
              ]
            },
            {
              "startLaneIndex": 0,
              "endLaneIndex": 1,
              "points": [
                {
                  "x": 298.5,
                  "y": 5.0
                },
                {
                  "x": 298.637,
                  "y": 4.329
                },
                {
                  "x": 299.016,
                  "y": 3.372
                },
                {
                  "x": 299.589,
                  "y": 2.213
                },
                {
                  "x": 300.308,
                  "y": 0.9359999999999999
                },
                {
                  "x": 301.125,
                  "y": -0.375
                },
                {
                  "x": 301.992,
                  "y": -1.636
                },
                {
                  "x": 302.861,
                  "y": -2.763
                },
                {
                  "x": 303.68399999999997,
                  "y": -3.672
                },
                {
                  "x": 304.413,
                  "y": -4.279
                },
                {
                  "x": 305.0,
                  "y": -4.5
                }
              ]
            },
            {
              "startLaneIndex": 0,
              "endLaneIndex": 2,
              "points": [
                {
                  "x": 298.5,
                  "y": 5.0
                },
                {
                  "x": 298.637,
                  "y": 4.245
                },
                {
                  "x": 299.016,
                  "y": 3.06
                },
                {
                  "x": 299.589,
                  "y": 1.565
                },
                {
                  "x": 300.308,
                  "y": -0.12
                },
                {
                  "x": 301.125,
                  "y": -1.875
                },
                {
                  "x": 301.992,
                  "y": -3.58
                },
                {
                  "x": 302.861,
                  "y": -5.115
                },
                {
                  "x": 303.68399999999997,
                  "y": -6.36
                },
                {
                  "x": 304.413,
                  "y": -7.195
                },
                {
                  "x": 305.0,
                  "y": -7.5
                }
              ]
            }
          ]
        },
        {
          "type": "go_straight",
          "startRoad": "road_2_2_3",
          "endRoad": "road_2_1_3",
          "direction": 3,
          "laneLinks": [
            {
              "startLaneIndex": 1,
              "endLaneIndex": 0,
              "points": [
                {
                  "x": 295.5,
                  "y": 5.0
                },
                {
                  "x": 295.584,
                  "y": 4.36
                },
                {
                  "x": 295.812,
                  "y": 3.48
                },
                {
                  "x": 296.148,
                  "y": 2.42
                },
                {
                  "x": 296.556,
                  "y": 1.24
                },
                {
                  "x": 297.0,
                  "y": 0.0
                },
                {
                  "x": 297.444,
                  "y": -1.24
                },
                {
                  "x": 297.852,
                  "y": -2.42
                },
                {
                  "x": 298.188,
                  "y": -3.48
                },
                {
                  "x": 298.416,
                  "y": -4.36
                },
                {
                  "x": 298.5,
                  "y": -5.0
                }
              ]
            },
            {
              "startLaneIndex": 1,
              "endLaneIndex": 1,
              "points": [
                {
                  "x": 295.5,
                  "y": 5.0
                },
                {
                  "x": 295.5,
                  "y": 4.36
                },
                {
                  "x": 295.5,
                  "y": 3.48
                },
                {
                  "x": 295.5,
                  "y": 2.42
                },
                {
                  "x": 295.5,
                  "y": 1.24
                },
                {
                  "x": 295.5,
                  "y": 0.0
                },
                {
                  "x": 295.5,
                  "y": -1.24
                },
                {
                  "x": 295.5,
                  "y": -2.42
                },
                {
                  "x": 295.5,
                  "y": -3.48
                },
                {
                  "x": 295.5,
                  "y": -4.36
                },
                {
                  "x": 295.5,
                  "y": -5.0
                }
              ]
            },
            {
              "startLaneIndex": 1,
              "endLaneIndex": 2,
              "points": [
                {
                  "x": 295.5,
                  "y": 5.0
                },
                {
                  "x": 295.416,
                  "y": 4.36
                },
                {
                  "x": 295.188,
                  "y": 3.48
                },
                {
                  "x": 294.852,
                  "y": 2.42
                },
                {
                  "x": 294.444,
                  "y": 1.24
                },
                {
                  "x": 294.0,
                  "y": 0.0
                },
                {
                  "x": 293.556,
                  "y": -1.24
                },
                {
                  "x": 293.148,
                  "y": -2.42
                },
                {
                  "x": 292.812,
                  "y": -3.48
                },
                {
                  "x": 292.584,
                  "y": -4.36
                },
                {
                  "x": 292.5,
                  "y": -5.0
                }
              ]
            },
            {
              "startLaneIndex": 2,
              "endLaneIndex": 0,
              "points": [
                {
                  "x": 292.5,
                  "y": 5.0
                },
                {
                  "x": 292.668,
                  "y": 4.36
                },
                {
                  "x": 293.124,
                  "y": 3.48
                },
                {
                  "x": 293.796,
                  "y": 2.42
                },
                {
                  "x": 294.612,
                  "y": 1.24
                },
                {
                  "x": 295.5,
                  "y": 0.0
                },
                {
                  "x": 296.388,
                  "y": -1.24
                },
                {
                  "x": 297.204,
                  "y": -2.42
                },
                {
                  "x": 297.876,
                  "y": -3.48
                },
                {
                  "x": 298.332,
                  "y": -4.36
                },
                {
                  "x": 298.5,
                  "y": -5.0
                }
              ]
            },
            {
              "startLaneIndex": 2,
              "endLaneIndex": 1,
              "points": [
                {
                  "x": 292.5,
                  "y": 5.0
                },
                {
                  "x": 292.584,
                  "y": 4.36
                },
                {
                  "x": 292.812,
                  "y": 3.48
                },
                {
                  "x": 293.148,
                  "y": 2.42
                },
                {
                  "x": 293.556,
                  "y": 1.24
                },
                {
                  "x": 294.0,
                  "y": 0.0
                },
                {
                  "x": 294.444,
                  "y": -1.24
                },
                {
                  "x": 294.852,
                  "y": -2.42
                },
                {
                  "x": 295.188,
                  "y": -3.48
                },
                {
                  "x": 295.416,
                  "y": -4.36
                },
                {
                  "x": 295.5,
                  "y": -5.0
                }
              ]
            },
            {
              "startLaneIndex": 2,
              "endLaneIndex": 2,
              "points": [
                {
                  "x": 292.5,
                  "y": 5.0
                },
                {
                  "x": 292.5,
                  "y": 4.36
                },
                {
                  "x": 292.5,
                  "y": 3.48
                },
                {
                  "x": 292.5,
                  "y": 2.42
                },
                {
                  "x": 292.5,
                  "y": 1.24
                },
                {
                  "x": 292.5,
                  "y": 0.0
                },
                {
                  "x": 292.5,
                  "y": -1.24
                },
                {
                  "x": 292.5,
                  "y": -2.42
                },
                {
                  "x": 292.5,
                  "y": -3.48
                },
                {
                  "x": 292.5,
                  "y": -4.36
                },
                {
                  "x": 292.5,
                  "y": -5.0
                }
              ]
            }
          ]
        }
      ],
      "trafficLight": {
        "roadLinkIndices": [
          0,
          1,
          2,
          3,
          4,
          5,
          6,
          7
        ],
        "lightphases": [
          {
            "time": 5,
            "availableRoadLinks": []
          },
          {
            "time": 30,
            "availableRoadLinks": [
              0,
              4
            ]
          },
          {
            "time": 30,
            "availableRoadLinks": [
              2,
              7
            ]
          },
          {
            "time": 30,
            "availableRoadLinks": [
              1,
              5
            ]
          },
          {
            "time": 30,
            "availableRoadLinks": [
              3,
              6
            ]
          },
          {
            "time": 30,
            "availableRoadLinks": [
              0,
              1
            ]
          },
          {
            "time": 30,
            "availableRoadLinks": [
              4,
              5
            ]
          },
          {
            "time": 30,
            "availableRoadLinks": [
              2,
              3
            ]
          },
          {
            "time": 30,
            "availableRoadLinks": [
              6,
              7
            ]
          }
        ]
      },
      "virtual": false
    },
    {
      "id": "intersection_2_2",
      "point": {
        "x": 300,
        "y": 300
      },
      "width": 5,
      "roads": [
        "road_1_2_0",
        "road_2_1_1",
        "road_3_2_2",
        "road_2_3_3",
        "road_2_2_0",
        "road_2_2_1",
        "road_2_2_2",
        "road_2_2_3"
      ],
      "roadLinks": [
        {
          "type": "go_straight",
          "startRoad": "road_1_2_0",
          "endRoad": "road_2_2_0",
          "direction": 0,
          "laneLinks": [
            {
              "startLaneIndex": 1,
              "endLaneIndex": 0,
              "points": [
                {
                  "x": 295.0,
                  "y": 295.5
                },
                {
                  "x": 295.64,
                  "y": 295.584
                },
                {
                  "x": 296.52,
                  "y": 295.812
                },
                {
                  "x": 297.58,
                  "y": 296.148
                },
                {
                  "x": 298.76,
                  "y": 296.556
                },
                {
                  "x": 300.0,
                  "y": 297.0
                },
                {
                  "x": 301.24,
                  "y": 297.444
                },
                {
                  "x": 302.42,
                  "y": 297.852
                },
                {
                  "x": 303.48,
                  "y": 298.188
                },
                {
                  "x": 304.36,
                  "y": 298.416
                },
                {
                  "x": 305.0,
                  "y": 298.5
                }
              ]
            },
            {
              "startLaneIndex": 1,
              "endLaneIndex": 1,
              "points": [
                {
                  "x": 295.0,
                  "y": 295.5
                },
                {
                  "x": 295.64,
                  "y": 295.5
                },
                {
                  "x": 296.52,
                  "y": 295.5
                },
                {
                  "x": 297.58,
                  "y": 295.5
                },
                {
                  "x": 298.76,
                  "y": 295.5
                },
                {
                  "x": 300.0,
                  "y": 295.5
                },
                {
                  "x": 301.24,
                  "y": 295.5
                },
                {
                  "x": 302.42,
                  "y": 295.5
                },
                {
                  "x": 303.48,
                  "y": 295.5
                },
                {
                  "x": 304.36,
                  "y": 295.5
                },
                {
                  "x": 305.0,
                  "y": 295.5
                }
              ]
            },
            {
              "startLaneIndex": 1,
              "endLaneIndex": 2,
              "points": [
                {
                  "x": 295.0,
                  "y": 295.5
                },
                {
                  "x": 295.64,
                  "y": 295.416
                },
                {
                  "x": 296.52,
                  "y": 295.188
                },
                {
                  "x": 297.58,
                  "y": 294.852
                },
                {
                  "x": 298.76,
                  "y": 294.444
                },
                {
                  "x": 300.0,
                  "y": 294.0
                },
                {
                  "x": 301.24,
                  "y": 293.556
                },
                {
                  "x": 302.42,
                  "y": 293.148
                },
                {
                  "x": 303.48,
                  "y": 292.812
                },
                {
                  "x": 304.36,
                  "y": 292.584
                },
                {
                  "x": 305.0,
                  "y": 292.5
                }
              ]
            },
            {
              "startLaneIndex": 2,
              "endLaneIndex": 0,
              "points": [
                {
                  "x": 295.0,
                  "y": 292.5
                },
                {
                  "x": 295.64,
                  "y": 292.668
                },
                {
                  "x": 296.52,
                  "y": 293.124
                },
                {
                  "x": 297.58,
                  "y": 293.796
                },
                {
                  "x": 298.76,
                  "y": 294.612
                },
                {
                  "x": 300.0,
                  "y": 295.5
                },
                {
                  "x": 301.24,
                  "y": 296.388
                },
                {
                  "x": 302.42,
                  "y": 297.204
                },
                {
                  "x": 303.48,
                  "y": 297.876
                },
                {
                  "x": 304.36,
                  "y": 298.332
                },
                {
                  "x": 305.0,
                  "y": 298.5
                }
              ]
            },
            {
              "startLaneIndex": 2,
              "endLaneIndex": 1,
              "points": [
                {
                  "x": 295.0,
                  "y": 292.5
                },
                {
                  "x": 295.64,
                  "y": 292.584
                },
                {
                  "x": 296.52,
                  "y": 292.812
                },
                {
                  "x": 297.58,
                  "y": 293.148
                },
                {
                  "x": 298.76,
                  "y": 293.556
                },
                {
                  "x": 300.0,
                  "y": 294.0
                },
                {
                  "x": 301.24,
                  "y": 294.444
                },
                {
                  "x": 302.42,
                  "y": 294.852
                },
                {
                  "x": 303.48,
                  "y": 295.188
                },
                {
                  "x": 304.36,
                  "y": 295.416
                },
                {
                  "x": 305.0,
                  "y": 295.5
                }
              ]
            },
            {
              "startLaneIndex": 2,
              "endLaneIndex": 2,
              "points": [
                {
                  "x": 295.0,
                  "y": 292.5
                },
                {
                  "x": 295.64,
                  "y": 292.5
                },
                {
                  "x": 296.52,
                  "y": 292.5
                },
                {
                  "x": 297.58,
                  "y": 292.5
                },
                {
                  "x": 298.76,
                  "y": 292.5
                },
                {
                  "x": 300.0,
                  "y": 292.5
                },
                {
                  "x": 301.24,
                  "y": 292.5
                },
                {
                  "x": 302.42,
                  "y": 292.5
                },
                {
                  "x": 303.48,
                  "y": 292.5
                },
                {
                  "x": 304.36,
                  "y": 292.5
                },
                {
                  "x": 305.0,
                  "y": 292.5
                }
              ]
            }
          ]
        },
        {
          "type": "turn_left",
          "startRoad": "road_1_2_0",
          "endRoad": "road_2_2_1",
          "direction": 0,
          "laneLinks": [
            {
              "startLaneIndex": 0,
              "endLaneIndex": 0,
              "points": [
                {
                  "x": 295.0,
                  "y": 298.5
                },
                {
                  "x": 295.587,
                  "y": 298.637
                },
                {
                  "x": 296.316,
                  "y": 299.016
                },
                {
                  "x": 297.139,
                  "y": 299.589
                },
                {
                  "x": 298.008,
                  "y": 300.308
                },
                {
                  "x": 298.875,
                  "y": 301.125
                },
                {
                  "x": 299.692,
                  "y": 301.992
                },
                {
                  "x": 300.411,
                  "y": 302.861
                },
                {
                  "x": 300.984,
                  "y": 303.68399999999997
                },
                {
                  "x": 301.363,
                  "y": 304.413
                },
                {
                  "x": 301.5,
                  "y": 305.0
                }
              ]
            },
            {
              "startLaneIndex": 0,
              "endLaneIndex": 1,
              "points": [
                {
                  "x": 295.0,
                  "y": 298.5
                },
                {
                  "x": 295.671,
                  "y": 298.637
                },
                {
                  "x": 296.628,
                  "y": 299.016
                },
                {
                  "x": 297.787,
                  "y": 299.589
                },
                {
                  "x": 299.064,
                  "y": 300.308
                },
                {
                  "x": 300.375,
                  "y": 301.125
                },
                {
                  "x": 301.636,
                  "y": 301.992
                },
                {
                  "x": 302.763,
                  "y": 302.861
                },
                {
                  "x": 303.672,
                  "y": 303.68399999999997
                },
                {
                  "x": 304.279,
                  "y": 304.413
                },
                {
                  "x": 304.5,
                  "y": 305.0
                }
              ]
            },
            {
              "startLaneIndex": 0,
              "endLaneIndex": 2,
              "points": [
                {
                  "x": 295.0,
                  "y": 298.5
                },
                {
                  "x": 295.755,
                  "y": 298.637
                },
                {
                  "x": 296.94,
                  "y": 299.016
                },
                {
                  "x": 298.435,
                  "y": 299.589
                },
                {
                  "x": 300.12,
                  "y": 300.308
                },
                {
                  "x": 301.875,
                  "y": 301.125
                },
                {
                  "x": 303.58,
                  "y": 301.992
                },
                {
                  "x": 305.115,
                  "y": 302.861
                },
                {
                  "x": 306.36,
                  "y": 303.68399999999997
                },
                {
                  "x": 307.195,
                  "y": 304.413
                },
                {
                  "x": 307.5,
                  "y": 305.0
                }
              ]
            }
          ]
        },
        {
          "type": "go_straight",
          "startRoad": "road_2_1_1",
          "endRoad": "road_2_2_1",
          "direction": 1,
          "laneLinks": [
            {
              "startLaneIndex": 1,
              "endLaneIndex": 0,
              "points": [
                {
                  "x": 304.5,
                  "y": 295.0
                },
                {
                  "x": 304.416,
                  "y": 295.64
                },
                {
                  "x": 304.188,
                  "y": 296.52
                },
                {
                  "x": 303.852,
                  "y": 297.58
                },
                {
                  "x": 303.444,
                  "y": 298.76
                },
                {
                  "x": 303.0,
                  "y": 300.0
                },
                {
                  "x": 302.556,
                  "y": 301.24
                },
                {
                  "x": 302.148,
                  "y": 302.42
                },
                {
                  "x": 301.812,
                  "y": 303.48
                },
                {
                  "x": 301.584,
                  "y": 304.36
                },
                {
                  "x": 301.5,
                  "y": 305.0
                }
              ]
            },
            {
              "startLaneIndex": 1,
              "endLaneIndex": 1,
              "points": [
                {
                  "x": 304.5,
                  "y": 295.0
                },
                {
                  "x": 304.5,
                  "y": 295.64
                },
                {
                  "x": 304.5,
                  "y": 296.52
                },
                {
                  "x": 304.5,
                  "y": 297.58
                },
                {
                  "x": 304.5,
                  "y": 298.76
                },
                {
                  "x": 304.5,
                  "y": 300.0
                },
                {
                  "x": 304.5,
                  "y": 301.24
                },
                {
                  "x": 304.5,
                  "y": 302.42
                },
                {
                  "x": 304.5,
                  "y": 303.48
                },
                {
                  "x": 304.5,
                  "y": 304.36
                },
                {
                  "x": 304.5,
                  "y": 305.0
                }
              ]
            },
            {
              "startLaneIndex": 1,
              "endLaneIndex": 2,
              "points": [
                {
                  "x": 304.5,
                  "y": 295.0
                },
                {
                  "x": 304.584,
                  "y": 295.64
                },
                {
                  "x": 304.812,
                  "y": 296.52
                },
                {
                  "x": 305.148,
                  "y": 297.58
                },
                {
                  "x": 305.556,
                  "y": 298.76
                },
                {
                  "x": 306.0,
                  "y": 300.0
                },
                {
                  "x": 306.444,
                  "y": 301.24
                },
                {
                  "x": 306.852,
                  "y": 302.42
                },
                {
                  "x": 307.188,
                  "y": 303.48
                },
                {
                  "x": 307.416,
                  "y": 304.36
                },
                {
                  "x": 307.5,
                  "y": 305.0
                }
              ]
            },
            {
              "startLaneIndex": 2,
              "endLaneIndex": 0,
              "points": [
                {
                  "x": 307.5,
                  "y": 295.0
                },
                {
                  "x": 307.332,
                  "y": 295.64
                },
                {
                  "x": 306.876,
                  "y": 296.52
                },
                {
                  "x": 306.204,
                  "y": 297.58
                },
                {
                  "x": 305.388,
                  "y": 298.76
                },
                {
                  "x": 304.5,
                  "y": 300.0
                },
                {
                  "x": 303.612,
                  "y": 301.24
                },
                {
                  "x": 302.796,
                  "y": 302.42
                },
                {
                  "x": 302.124,
                  "y": 303.48
                },
                {
                  "x": 301.668,
                  "y": 304.36
                },
                {
                  "x": 301.5,
                  "y": 305.0
                }
              ]
            },
            {
              "startLaneIndex": 2,
              "endLaneIndex": 1,
              "points": [
                {
                  "x": 307.5,
                  "y": 295.0
                },
                {
                  "x": 307.416,
                  "y": 295.64
                },
                {
                  "x": 307.188,
                  "y": 296.52
                },
                {
                  "x": 306.852,
                  "y": 297.58
                },
                {
                  "x": 306.444,
                  "y": 298.76
                },
                {
                  "x": 306.0,
                  "y": 300.0
                },
                {
                  "x": 305.556,
                  "y": 301.24
                },
                {
                  "x": 305.148,
                  "y": 302.42
                },
                {
                  "x": 304.812,
                  "y": 303.48
                },
                {
                  "x": 304.584,
                  "y": 304.36
                },
                {
                  "x": 304.5,
                  "y": 305.0
                }
              ]
            },
            {
              "startLaneIndex": 2,
              "endLaneIndex": 2,
              "points": [
                {
                  "x": 307.5,
                  "y": 295.0
                },
                {
                  "x": 307.5,
                  "y": 295.64
                },
                {
                  "x": 307.5,
                  "y": 296.52
                },
                {
                  "x": 307.5,
                  "y": 297.58
                },
                {
                  "x": 307.5,
                  "y": 298.76
                },
                {
                  "x": 307.5,
                  "y": 300.0
                },
                {
                  "x": 307.5,
                  "y": 301.24
                },
                {
                  "x": 307.5,
                  "y": 302.42
                },
                {
                  "x": 307.5,
                  "y": 303.48
                },
                {
                  "x": 307.5,
                  "y": 304.36
                },
                {
                  "x": 307.5,
                  "y": 305.0
                }
              ]
            }
          ]
        },
        {
          "type": "turn_left",
          "startRoad": "road_2_1_1",
          "endRoad": "road_2_2_2",
          "direction": 1,
          "laneLinks": [
            {
              "startLaneIndex": 0,
              "endLaneIndex": 0,
              "points": [
                {
                  "x": 301.5,
                  "y": 295.0
                },
                {
                  "x": 301.363,
                  "y": 295.587
                },
                {
                  "x": 300.984,
                  "y": 296.316
                },
                {
                  "x": 300.411,
                  "y": 297.139
                },
                {
                  "x": 299.692,
                  "y": 298.008
                },
                {
                  "x": 298.875,
                  "y": 298.875
                },
                {
                  "x": 298.008,
                  "y": 299.692
                },
                {
                  "x": 297.139,
                  "y": 300.411
                },
                {
                  "x": 296.316,
                  "y": 300.984
                },
                {
                  "x": 295.587,
                  "y": 301.363
                },
                {
                  "x": 295.0,
                  "y": 301.5
                }
              ]
            },
            {
              "startLaneIndex": 0,
              "endLaneIndex": 1,
              "points": [
                {
                  "x": 301.5,
                  "y": 295.0
                },
                {
                  "x": 301.363,
                  "y": 295.671
                },
                {
                  "x": 300.984,
                  "y": 296.628
                },
                {
                  "x": 300.411,
                  "y": 297.787
                },
                {
                  "x": 299.692,
                  "y": 299.064
                },
                {
                  "x": 298.875,
                  "y": 300.375
                },
                {
                  "x": 298.008,
                  "y": 301.636
                },
                {
                  "x": 297.139,
                  "y": 302.763
                },
                {
                  "x": 296.316,
                  "y": 303.672
                },
                {
                  "x": 295.587,
                  "y": 304.279
                },
                {
                  "x": 295.0,
                  "y": 304.5
                }
              ]
            },
            {
              "startLaneIndex": 0,
              "endLaneIndex": 2,
              "points": [
                {
                  "x": 301.5,
                  "y": 295.0
                },
                {
                  "x": 301.363,
                  "y": 295.755
                },
                {
                  "x": 300.984,
                  "y": 296.94
                },
                {
                  "x": 300.411,
                  "y": 298.435
                },
                {
                  "x": 299.692,
                  "y": 300.12
                },
                {
                  "x": 298.875,
                  "y": 301.875
                },
                {
                  "x": 298.008,
                  "y": 303.58
                },
                {
                  "x": 297.139,
                  "y": 305.115
                },
                {
                  "x": 296.316,
                  "y": 306.36
                },
                {
                  "x": 295.587,
                  "y": 307.195
                },
                {
                  "x": 295.0,
                  "y": 307.5
                }
              ]
            }
          ]
        },
        {
          "type": "go_straight",
          "startRoad": "road_3_2_2",
          "endRoad": "road_2_2_2",
          "direction": 2,
          "laneLinks": [
            {
              "startLaneIndex": 1,
              "endLaneIndex": 0,
              "points": [
                {
                  "x": 305.0,
                  "y": 304.5
                },
                {
                  "x": 304.36,
                  "y": 304.416
                },
                {
                  "x": 303.48,
                  "y": 304.188
                },
                {
                  "x": 302.42,
                  "y": 303.852
                },
                {
                  "x": 301.24,
                  "y": 303.444
                },
                {
                  "x": 300.0,
                  "y": 303.0
                },
                {
                  "x": 298.76,
                  "y": 302.556
                },
                {
                  "x": 297.58,
                  "y": 302.148
                },
                {
                  "x": 296.52,
                  "y": 301.812
                },
                {
                  "x": 295.64,
                  "y": 301.584
                },
                {
                  "x": 295.0,
                  "y": 301.5
                }
              ]
            },
            {
              "startLaneIndex": 1,
              "endLaneIndex": 1,
              "points": [
                {
                  "x": 305.0,
                  "y": 304.5
                },
                {
                  "x": 304.36,
                  "y": 304.5
                },
                {
                  "x": 303.48,
                  "y": 304.5
                },
                {
                  "x": 302.42,
                  "y": 304.5
                },
                {
                  "x": 301.24,
                  "y": 304.5
                },
                {
                  "x": 300.0,
                  "y": 304.5
                },
                {
                  "x": 298.76,
                  "y": 304.5
                },
                {
                  "x": 297.58,
                  "y": 304.5
                },
                {
                  "x": 296.52,
                  "y": 304.5
                },
                {
                  "x": 295.64,
                  "y": 304.5
                },
                {
                  "x": 295.0,
                  "y": 304.5
                }
              ]
            },
            {
              "startLaneIndex": 1,
              "endLaneIndex": 2,
              "points": [
                {
                  "x": 305.0,
                  "y": 304.5
                },
                {
                  "x": 304.36,
                  "y": 304.584
                },
                {
                  "x": 303.48,
                  "y": 304.812
                },
                {
                  "x": 302.42,
                  "y": 305.148
                },
                {
                  "x": 301.24,
                  "y": 305.556
                },
                {
                  "x": 300.0,
                  "y": 306.0
                },
                {
                  "x": 298.76,
                  "y": 306.444
                },
                {
                  "x": 297.58,
                  "y": 306.852
                },
                {
                  "x": 296.52,
                  "y": 307.188
                },
                {
                  "x": 295.64,
                  "y": 307.416
                },
                {
                  "x": 295.0,
                  "y": 307.5
                }
              ]
            },
            {
              "startLaneIndex": 2,
              "endLaneIndex": 0,
              "points": [
                {
                  "x": 305.0,
                  "y": 307.5
                },
                {
                  "x": 304.36,
                  "y": 307.332
                },
                {
                  "x": 303.48,
                  "y": 306.876
                },
                {
                  "x": 302.42,
                  "y": 306.204
                },
                {
                  "x": 301.24,
                  "y": 305.388
                },
                {
                  "x": 300.0,
                  "y": 304.5
                },
                {
                  "x": 298.76,
                  "y": 303.612
                },
                {
                  "x": 297.58,
                  "y": 302.796
                },
                {
                  "x": 296.52,
                  "y": 302.124
                },
                {
                  "x": 295.64,
                  "y": 301.668
                },
                {
                  "x": 295.0,
                  "y": 301.5
                }
              ]
            },
            {
              "startLaneIndex": 2,
              "endLaneIndex": 1,
              "points": [
                {
                  "x": 305.0,
                  "y": 307.5
                },
                {
                  "x": 304.36,
                  "y": 307.416
                },
                {
                  "x": 303.48,
                  "y": 307.188
                },
                {
                  "x": 302.42,
                  "y": 306.852
                },
                {
                  "x": 301.24,
                  "y": 306.444
                },
                {
                  "x": 300.0,
                  "y": 306.0
                },
                {
                  "x": 298.76,
                  "y": 305.556
                },
                {
                  "x": 297.58,
                  "y": 305.148
                },
                {
                  "x": 296.52,
                  "y": 304.812
                },
                {
                  "x": 295.64,
                  "y": 304.584
                },
                {
                  "x": 295.0,
                  "y": 304.5
                }
              ]
            },
            {
              "startLaneIndex": 2,
              "endLaneIndex": 2,
              "points": [
                {
                  "x": 305.0,
                  "y": 307.5
                },
                {
                  "x": 304.36,
                  "y": 307.5
                },
                {
                  "x": 303.48,
                  "y": 307.5
                },
                {
                  "x": 302.42,
                  "y": 307.5
                },
                {
                  "x": 301.24,
                  "y": 307.5
                },
                {
                  "x": 300.0,
                  "y": 307.5
                },
                {
                  "x": 298.76,
                  "y": 307.5
                },
                {
                  "x": 297.58,
                  "y": 307.5
                },
                {
                  "x": 296.52,
                  "y": 307.5
                },
                {
                  "x": 295.64,
                  "y": 307.5
                },
                {
                  "x": 295.0,
                  "y": 307.5
                }
              ]
            }
          ]
        },
        {
          "type": "turn_left",
          "startRoad": "road_3_2_2",
          "endRoad": "road_2_2_3",
          "direction": 2,
          "laneLinks": [
            {
              "startLaneIndex": 0,
              "endLaneIndex": 0,
              "points": [
                {
                  "x": 305.0,
                  "y": 301.5
                },
                {
                  "x": 304.413,
                  "y": 301.363
                },
                {
                  "x": 303.68399999999997,
                  "y": 300.984
                },
                {
                  "x": 302.861,
                  "y": 300.411
                },
                {
                  "x": 301.992,
                  "y": 299.692
                },
                {
                  "x": 301.125,
                  "y": 298.875
                },
                {
                  "x": 300.308,
                  "y": 298.008
                },
                {
                  "x": 299.589,
                  "y": 297.139
                },
                {
                  "x": 299.016,
                  "y": 296.316
                },
                {
                  "x": 298.637,
                  "y": 295.587
                },
                {
                  "x": 298.5,
                  "y": 295.0
                }
              ]
            },
            {
              "startLaneIndex": 0,
              "endLaneIndex": 1,
              "points": [
                {
                  "x": 305.0,
                  "y": 301.5
                },
                {
                  "x": 304.329,
                  "y": 301.363
                },
                {
                  "x": 303.372,
                  "y": 300.984
                },
                {
                  "x": 302.213,
                  "y": 300.411
                },
                {
                  "x": 300.936,
                  "y": 299.692
                },
                {
                  "x": 299.625,
                  "y": 298.875
                },
                {
                  "x": 298.364,
                  "y": 298.008
                },
                {
                  "x": 297.237,
                  "y": 297.139
                },
                {
                  "x": 296.328,
                  "y": 296.316
                },
                {
                  "x": 295.721,
                  "y": 295.587
                },
                {
                  "x": 295.5,
                  "y": 295.0
                }
              ]
            },
            {
              "startLaneIndex": 0,
              "endLaneIndex": 2,
              "points": [
                {
                  "x": 305.0,
                  "y": 301.5
                },
                {
                  "x": 304.245,
                  "y": 301.363
                },
                {
                  "x": 303.06,
                  "y": 300.984
                },
                {
                  "x": 301.565,
                  "y": 300.411
                },
                {
                  "x": 299.88,
                  "y": 299.692
                },
                {
                  "x": 298.125,
                  "y": 298.875
                },
                {
                  "x": 296.42,
                  "y": 298.008
                },
                {
                  "x": 294.885,
                  "y": 297.139
                },
                {
                  "x": 293.64,
                  "y": 296.316
                },
                {
                  "x": 292.805,
                  "y": 295.587
                },
                {
                  "x": 292.5,
                  "y": 295.0
                }
              ]
            }
          ]
        },
        {
          "type": "turn_left",
          "startRoad": "road_2_3_3",
          "endRoad": "road_2_2_0",
          "direction": 3,
          "laneLinks": [
            {
              "startLaneIndex": 0,
              "endLaneIndex": 0,
              "points": [
                {
                  "x": 298.5,
                  "y": 305.0
                },
                {
                  "x": 298.637,
                  "y": 304.413
                },
                {
                  "x": 299.016,
                  "y": 303.68399999999997
                },
                {
                  "x": 299.589,
                  "y": 302.861
                },
                {
                  "x": 300.308,
                  "y": 301.992
                },
                {
                  "x": 301.125,
                  "y": 301.125
                },
                {
                  "x": 301.992,
                  "y": 300.308
                },
                {
                  "x": 302.861,
                  "y": 299.589
                },
                {
                  "x": 303.68399999999997,
                  "y": 299.016
                },
                {
                  "x": 304.413,
                  "y": 298.637
                },
                {
                  "x": 305.0,
                  "y": 298.5
                }
              ]
            },
            {
              "startLaneIndex": 0,
              "endLaneIndex": 1,
              "points": [
                {
                  "x": 298.5,
                  "y": 305.0
                },
                {
                  "x": 298.637,
                  "y": 304.329
                },
                {
                  "x": 299.016,
                  "y": 303.372
                },
                {
                  "x": 299.589,
                  "y": 302.213
                },
                {
                  "x": 300.308,
                  "y": 300.936
                },
                {
                  "x": 301.125,
                  "y": 299.625
                },
                {
                  "x": 301.992,
                  "y": 298.364
                },
                {
                  "x": 302.861,
                  "y": 297.237
                },
                {
                  "x": 303.68399999999997,
                  "y": 296.328
                },
                {
                  "x": 304.413,
                  "y": 295.721
                },
                {
                  "x": 305.0,
                  "y": 295.5
                }
              ]
            },
            {
              "startLaneIndex": 0,
              "endLaneIndex": 2,
              "points": [
                {
                  "x": 298.5,
                  "y": 305.0
                },
                {
                  "x": 298.637,
                  "y": 304.245
                },
                {
                  "x": 299.016,
                  "y": 303.06
                },
                {
                  "x": 299.589,
                  "y": 301.565
                },
                {
                  "x": 300.308,
                  "y": 299.88
                },
                {
                  "x": 301.125,
                  "y": 298.125
                },
                {
                  "x": 301.992,
                  "y": 296.42
                },
                {
                  "x": 302.861,
                  "y": 294.885
                },
                {
                  "x": 303.68399999999997,
                  "y": 293.64
                },
                {
                  "x": 304.413,
                  "y": 292.805
                },
                {
                  "x": 305.0,
                  "y": 292.5
                }
              ]
            }
          ]
        },
        {
          "type": "go_straight",
          "startRoad": "road_2_3_3",
          "endRoad": "road_2_2_3",
          "direction": 3,
          "laneLinks": [
            {
              "startLaneIndex": 1,
              "endLaneIndex": 0,
              "points": [
                {
                  "x": 295.5,
                  "y": 305.0
                },
                {
                  "x": 295.584,
                  "y": 304.36
                },
                {
                  "x": 295.812,
                  "y": 303.48
                },
                {
                  "x": 296.148,
                  "y": 302.42
                },
                {
                  "x": 296.556,
                  "y": 301.24
                },
                {
                  "x": 297.0,
                  "y": 300.0
                },
                {
                  "x": 297.444,
                  "y": 298.76
                },
                {
                  "x": 297.852,
                  "y": 297.58
                },
                {
                  "x": 298.188,
                  "y": 296.52
                },
                {
                  "x": 298.416,
                  "y": 295.64
                },
                {
                  "x": 298.5,
                  "y": 295.0
                }
              ]
            },
            {
              "startLaneIndex": 1,
              "endLaneIndex": 1,
              "points": [
                {
                  "x": 295.5,
                  "y": 305.0
                },
                {
                  "x": 295.5,
                  "y": 304.36
                },
                {
                  "x": 295.5,
                  "y": 303.48
                },
                {
                  "x": 295.5,
                  "y": 302.42
                },
                {
                  "x": 295.5,
                  "y": 301.24
                },
                {
                  "x": 295.5,
                  "y": 300.0
                },
                {
                  "x": 295.5,
                  "y": 298.76
                },
                {
                  "x": 295.5,
                  "y": 297.58
                },
                {
                  "x": 295.5,
                  "y": 296.52
                },
                {
                  "x": 295.5,
                  "y": 295.64
                },
                {
                  "x": 295.5,
                  "y": 295.0
                }
              ]
            },
            {
              "startLaneIndex": 1,
              "endLaneIndex": 2,
              "points": [
                {
                  "x": 295.5,
                  "y": 305.0
                },
                {
                  "x": 295.416,
                  "y": 304.36
                },
                {
                  "x": 295.188,
                  "y": 303.48
                },
                {
                  "x": 294.852,
                  "y": 302.42
                },
                {
                  "x": 294.444,
                  "y": 301.24
                },
                {
                  "x": 294.0,
                  "y": 300.0
                },
                {
                  "x": 293.556,
                  "y": 298.76
                },
                {
                  "x": 293.148,
                  "y": 297.58
                },
                {
                  "x": 292.812,
                  "y": 296.52
                },
                {
                  "x": 292.584,
                  "y": 295.64
                },
                {
                  "x": 292.5,
                  "y": 295.0
                }
              ]
            },
            {
              "startLaneIndex": 2,
              "endLaneIndex": 0,
              "points": [
                {
                  "x": 292.5,
                  "y": 305.0
                },
                {
                  "x": 292.668,
                  "y": 304.36
                },
                {
                  "x": 293.124,
                  "y": 303.48
                },
                {
                  "x": 293.796,
                  "y": 302.42
                },
                {
                  "x": 294.612,
                  "y": 301.24
                },
                {
                  "x": 295.5,
                  "y": 300.0
                },
                {
                  "x": 296.388,
                  "y": 298.76
                },
                {
                  "x": 297.204,
                  "y": 297.58
                },
                {
                  "x": 297.876,
                  "y": 296.52
                },
                {
                  "x": 298.332,
                  "y": 295.64
                },
                {
                  "x": 298.5,
                  "y": 295.0
                }
              ]
            },
            {
              "startLaneIndex": 2,
              "endLaneIndex": 1,
              "points": [
                {
                  "x": 292.5,
                  "y": 305.0
                },
                {
                  "x": 292.584,
                  "y": 304.36
                },
                {
                  "x": 292.812,
                  "y": 303.48
                },
                {
                  "x": 293.148,
                  "y": 302.42
                },
                {
                  "x": 293.556,
                  "y": 301.24
                },
                {
                  "x": 294.0,
                  "y": 300.0
                },
                {
                  "x": 294.444,
                  "y": 298.76
                },
                {
                  "x": 294.852,
                  "y": 297.58
                },
                {
                  "x": 295.188,
                  "y": 296.52
                },
                {
                  "x": 295.416,
                  "y": 295.64
                },
                {
                  "x": 295.5,
                  "y": 295.0
                }
              ]
            },
            {
              "startLaneIndex": 2,
              "endLaneIndex": 2,
              "points": [
                {
                  "x": 292.5,
                  "y": 305.0
                },
                {
                  "x": 292.5,
                  "y": 304.36
                },
                {
                  "x": 292.5,
                  "y": 303.48
                },
                {
                  "x": 292.5,
                  "y": 302.42
                },
                {
                  "x": 292.5,
                  "y": 301.24
                },
                {
                  "x": 292.5,
                  "y": 300.0
                },
                {
                  "x": 292.5,
                  "y": 298.76
                },
                {
                  "x": 292.5,
                  "y": 297.58
                },
                {
                  "x": 292.5,
                  "y": 296.52
                },
                {
                  "x": 292.5,
                  "y": 295.64
                },
                {
                  "x": 292.5,
                  "y": 295.0
                }
              ]
            }
          ]
        }
      ],
      "trafficLight": {
        "roadLinkIndices": [
          0,
          1,
          2,
          3,
          4,
          5,
          6,
          7
        ],
        "lightphases": [
          {
            "time": 5,
            "availableRoadLinks": []
          },
          {
            "time": 30,
            "availableRoadLinks": [
              0,
              4
            ]
          },
          {
            "time": 30,
            "availableRoadLinks": [
              2,
              7
            ]
          },
          {
            "time": 30,
            "availableRoadLinks": [
              1,
              5
            ]
          },
          {
            "time": 30,
            "availableRoadLinks": [
              3,
              6
            ]
          },
          {
            "time": 30,
            "availableRoadLinks": [
              0,
              1
            ]
          },
          {
            "time": 30,
            "availableRoadLinks": [
              4,
              5
            ]
          },
          {
            "time": 30,
            "availableRoadLinks": [
              2,
              3
            ]
          },
          {
            "time": 30,
            "availableRoadLinks": [
              6,
              7
            ]
          }
        ]
      },
      "virtual": false
    },
    {
      "id": "intersection_2_3",
      "point": {
        "x": 300,
        "y": 600
      },
      "width": 5,
      "roads": [
        "road_1_3_0",
        "road_2_2_1",
        "road_3_3_2",
        "road_2_4_3",
        "road_2_3_0",
        "road_2_3_1",
        "road_2_3_2",
        "road_2_3_3"
      ],
      "roadLinks": [
        {
          "type": "go_straight",
          "startRoad": "road_1_3_0",
          "endRoad": "road_2_3_0",
          "direction": 0,
          "laneLinks": [
            {
              "startLaneIndex": 1,
              "endLaneIndex": 0,
              "points": [
                {
                  "x": 295.0,
                  "y": 595.5
                },
                {
                  "x": 295.64,
                  "y": 595.584
                },
                {
                  "x": 296.52,
                  "y": 595.812
                },
                {
                  "x": 297.58,
                  "y": 596.148
                },
                {
                  "x": 298.76,
                  "y": 596.556
                },
                {
                  "x": 300.0,
                  "y": 597.0
                },
                {
                  "x": 301.24,
                  "y": 597.444
                },
                {
                  "x": 302.42,
                  "y": 597.852
                },
                {
                  "x": 303.48,
                  "y": 598.1879999999999
                },
                {
                  "x": 304.36,
                  "y": 598.4159999999999
                },
                {
                  "x": 305.0,
                  "y": 598.5
                }
              ]
            },
            {
              "startLaneIndex": 1,
              "endLaneIndex": 1,
              "points": [
                {
                  "x": 295.0,
                  "y": 595.5
                },
                {
                  "x": 295.64,
                  "y": 595.5
                },
                {
                  "x": 296.52,
                  "y": 595.5
                },
                {
                  "x": 297.58,
                  "y": 595.5
                },
                {
                  "x": 298.76,
                  "y": 595.5
                },
                {
                  "x": 300.0,
                  "y": 595.5
                },
                {
                  "x": 301.24,
                  "y": 595.5
                },
                {
                  "x": 302.42,
                  "y": 595.5
                },
                {
                  "x": 303.48,
                  "y": 595.4999999999999
                },
                {
                  "x": 304.36,
                  "y": 595.5
                },
                {
                  "x": 305.0,
                  "y": 595.5
                }
              ]
            },
            {
              "startLaneIndex": 1,
              "endLaneIndex": 2,
              "points": [
                {
                  "x": 295.0,
                  "y": 595.5
                },
                {
                  "x": 295.64,
                  "y": 595.4159999999999
                },
                {
                  "x": 296.52,
                  "y": 595.188
                },
                {
                  "x": 297.58,
                  "y": 594.852
                },
                {
                  "x": 298.76,
                  "y": 594.444
                },
                {
                  "x": 300.0,
                  "y": 594.0
                },
                {
                  "x": 301.24,
                  "y": 593.556
                },
                {
                  "x": 302.42,
                  "y": 593.148
                },
                {
                  "x": 303.48,
                  "y": 592.8119999999999
                },
                {
                  "x": 304.36,
                  "y": 592.584
                },
                {
                  "x": 305.0,
                  "y": 592.5
                }
              ]
            },
            {
              "startLaneIndex": 2,
              "endLaneIndex": 0,
              "points": [
                {
                  "x": 295.0,
                  "y": 592.5
                },
                {
                  "x": 295.64,
                  "y": 592.668
                },
                {
                  "x": 296.52,
                  "y": 593.124
                },
                {
                  "x": 297.58,
                  "y": 593.796
                },
                {
                  "x": 298.76,
                  "y": 594.612
                },
                {
                  "x": 300.0,
                  "y": 595.5
                },
                {
                  "x": 301.24,
                  "y": 596.388
                },
                {
                  "x": 302.42,
                  "y": 597.204
                },
                {
                  "x": 303.48,
                  "y": 597.8759999999999
                },
                {
                  "x": 304.36,
                  "y": 598.332
                },
                {
                  "x": 305.0,
                  "y": 598.5
                }
              ]
            },
            {
              "startLaneIndex": 2,
              "endLaneIndex": 1,
              "points": [
                {
                  "x": 295.0,
                  "y": 592.5
                },
                {
                  "x": 295.64,
                  "y": 592.584
                },
                {
                  "x": 296.52,
                  "y": 592.812
                },
                {
                  "x": 297.58,
                  "y": 593.148
                },
                {
                  "x": 298.76,
                  "y": 593.556
                },
                {
                  "x": 300.0,
                  "y": 594.0
                },
                {
                  "x": 301.24,
                  "y": 594.444
                },
                {
                  "x": 302.42,
                  "y": 594.852
                },
                {
                  "x": 303.48,
                  "y": 595.1879999999999
                },
                {
                  "x": 304.36,
                  "y": 595.4159999999999
                },
                {
                  "x": 305.0,
                  "y": 595.5
                }
              ]
            },
            {
              "startLaneIndex": 2,
              "endLaneIndex": 2,
              "points": [
                {
                  "x": 295.0,
                  "y": 592.5
                },
                {
                  "x": 295.64,
                  "y": 592.5
                },
                {
                  "x": 296.52,
                  "y": 592.5
                },
                {
                  "x": 297.58,
                  "y": 592.5
                },
                {
                  "x": 298.76,
                  "y": 592.5
                },
                {
                  "x": 300.0,
                  "y": 592.5
                },
                {
                  "x": 301.24,
                  "y": 592.5
                },
                {
                  "x": 302.42,
                  "y": 592.5
                },
                {
                  "x": 303.48,
                  "y": 592.4999999999999
                },
                {
                  "x": 304.36,
                  "y": 592.5
                },
                {
                  "x": 305.0,
                  "y": 592.5
                }
              ]
            }
          ]
        },
        {
          "type": "turn_left",
          "startRoad": "road_1_3_0",
          "endRoad": "road_2_3_1",
          "direction": 0,
          "laneLinks": [
            {
              "startLaneIndex": 0,
              "endLaneIndex": 0,
              "points": [
                {
                  "x": 295.0,
                  "y": 598.5
                },
                {
                  "x": 295.587,
                  "y": 598.637
                },
                {
                  "x": 296.316,
                  "y": 599.016
                },
                {
                  "x": 297.139,
                  "y": 599.5889999999999
                },
                {
                  "x": 298.008,
                  "y": 600.308
                },
                {
                  "x": 298.875,
                  "y": 601.125
                },
                {
                  "x": 299.692,
                  "y": 601.992
                },
                {
                  "x": 300.411,
                  "y": 602.861
                },
                {
                  "x": 300.984,
                  "y": 603.6839999999999
                },
                {
                  "x": 301.363,
                  "y": 604.413
                },
                {
                  "x": 301.5,
                  "y": 605.0
                }
              ]
            },
            {
              "startLaneIndex": 0,
              "endLaneIndex": 1,
              "points": [
                {
                  "x": 295.0,
                  "y": 598.5
                },
                {
                  "x": 295.671,
                  "y": 598.637
                },
                {
                  "x": 296.628,
                  "y": 599.016
                },
                {
                  "x": 297.787,
                  "y": 599.5889999999999
                },
                {
                  "x": 299.064,
                  "y": 600.308
                },
                {
                  "x": 300.375,
                  "y": 601.125
                },
                {
                  "x": 301.636,
                  "y": 601.992
                },
                {
                  "x": 302.763,
                  "y": 602.861
                },
                {
                  "x": 303.672,
                  "y": 603.6839999999999
                },
                {
                  "x": 304.279,
                  "y": 604.413
                },
                {
                  "x": 304.5,
                  "y": 605.0
                }
              ]
            },
            {
              "startLaneIndex": 0,
              "endLaneIndex": 2,
              "points": [
                {
                  "x": 295.0,
                  "y": 598.5
                },
                {
                  "x": 295.755,
                  "y": 598.637
                },
                {
                  "x": 296.94,
                  "y": 599.016
                },
                {
                  "x": 298.435,
                  "y": 599.5889999999999
                },
                {
                  "x": 300.12,
                  "y": 600.308
                },
                {
                  "x": 301.875,
                  "y": 601.125
                },
                {
                  "x": 303.58,
                  "y": 601.992
                },
                {
                  "x": 305.115,
                  "y": 602.861
                },
                {
                  "x": 306.36,
                  "y": 603.6839999999999
                },
                {
                  "x": 307.195,
                  "y": 604.413
                },
                {
                  "x": 307.5,
                  "y": 605.0
                }
              ]
            }
          ]
        },
        {
          "type": "go_straight",
          "startRoad": "road_2_2_1",
          "endRoad": "road_2_3_1",
          "direction": 1,
          "laneLinks": [
            {
              "startLaneIndex": 1,
              "endLaneIndex": 0,
              "points": [
                {
                  "x": 304.5,
                  "y": 595.0
                },
                {
                  "x": 304.416,
                  "y": 595.64
                },
                {
                  "x": 304.188,
                  "y": 596.52
                },
                {
                  "x": 303.852,
                  "y": 597.58
                },
                {
                  "x": 303.444,
                  "y": 598.76
                },
                {
                  "x": 303.0,
                  "y": 600.0
                },
                {
                  "x": 302.556,
                  "y": 601.24
                },
                {
                  "x": 302.148,
                  "y": 602.42
                },
                {
                  "x": 301.812,
                  "y": 603.4799999999999
                },
                {
                  "x": 301.584,
                  "y": 604.36
                },
                {
                  "x": 301.5,
                  "y": 605.0
                }
              ]
            },
            {
              "startLaneIndex": 1,
              "endLaneIndex": 1,
              "points": [
                {
                  "x": 304.5,
                  "y": 595.0
                },
                {
                  "x": 304.5,
                  "y": 595.64
                },
                {
                  "x": 304.5,
                  "y": 596.52
                },
                {
                  "x": 304.5,
                  "y": 597.58
                },
                {
                  "x": 304.5,
                  "y": 598.76
                },
                {
                  "x": 304.5,
                  "y": 600.0
                },
                {
                  "x": 304.5,
                  "y": 601.24
                },
                {
                  "x": 304.5,
                  "y": 602.42
                },
                {
                  "x": 304.5,
                  "y": 603.4799999999999
                },
                {
                  "x": 304.5,
                  "y": 604.36
                },
                {
                  "x": 304.5,
                  "y": 605.0
                }
              ]
            },
            {
              "startLaneIndex": 1,
              "endLaneIndex": 2,
              "points": [
                {
                  "x": 304.5,
                  "y": 595.0
                },
                {
                  "x": 304.584,
                  "y": 595.64
                },
                {
                  "x": 304.812,
                  "y": 596.52
                },
                {
                  "x": 305.148,
                  "y": 597.58
                },
                {
                  "x": 305.556,
                  "y": 598.76
                },
                {
                  "x": 306.0,
                  "y": 600.0
                },
                {
                  "x": 306.444,
                  "y": 601.24
                },
                {
                  "x": 306.852,
                  "y": 602.42
                },
                {
                  "x": 307.188,
                  "y": 603.4799999999999
                },
                {
                  "x": 307.416,
                  "y": 604.36
                },
                {
                  "x": 307.5,
                  "y": 605.0
                }
              ]
            },
            {
              "startLaneIndex": 2,
              "endLaneIndex": 0,
              "points": [
                {
                  "x": 307.5,
                  "y": 595.0
                },
                {
                  "x": 307.332,
                  "y": 595.64
                },
                {
                  "x": 306.876,
                  "y": 596.52
                },
                {
                  "x": 306.204,
                  "y": 597.58
                },
                {
                  "x": 305.388,
                  "y": 598.76
                },
                {
                  "x": 304.5,
                  "y": 600.0
                },
                {
                  "x": 303.612,
                  "y": 601.24
                },
                {
                  "x": 302.796,
                  "y": 602.42
                },
                {
                  "x": 302.124,
                  "y": 603.4799999999999
                },
                {
                  "x": 301.668,
                  "y": 604.36
                },
                {
                  "x": 301.5,
                  "y": 605.0
                }
              ]
            },
            {
              "startLaneIndex": 2,
              "endLaneIndex": 1,
              "points": [
                {
                  "x": 307.5,
                  "y": 595.0
                },
                {
                  "x": 307.416,
                  "y": 595.64
                },
                {
                  "x": 307.188,
                  "y": 596.52
                },
                {
                  "x": 306.852,
                  "y": 597.58
                },
                {
                  "x": 306.444,
                  "y": 598.76
                },
                {
                  "x": 306.0,
                  "y": 600.0
                },
                {
                  "x": 305.556,
                  "y": 601.24
                },
                {
                  "x": 305.148,
                  "y": 602.42
                },
                {
                  "x": 304.812,
                  "y": 603.4799999999999
                },
                {
                  "x": 304.584,
                  "y": 604.36
                },
                {
                  "x": 304.5,
                  "y": 605.0
                }
              ]
            },
            {
              "startLaneIndex": 2,
              "endLaneIndex": 2,
              "points": [
                {
                  "x": 307.5,
                  "y": 595.0
                },
                {
                  "x": 307.5,
                  "y": 595.64
                },
                {
                  "x": 307.5,
                  "y": 596.52
                },
                {
                  "x": 307.5,
                  "y": 597.58
                },
                {
                  "x": 307.5,
                  "y": 598.76
                },
                {
                  "x": 307.5,
                  "y": 600.0
                },
                {
                  "x": 307.5,
                  "y": 601.24
                },
                {
                  "x": 307.5,
                  "y": 602.42
                },
                {
                  "x": 307.5,
                  "y": 603.4799999999999
                },
                {
                  "x": 307.5,
                  "y": 604.36
                },
                {
                  "x": 307.5,
                  "y": 605.0
                }
              ]
            }
          ]
        },
        {
          "type": "turn_left",
          "startRoad": "road_2_2_1",
          "endRoad": "road_2_3_2",
          "direction": 1,
          "laneLinks": [
            {
              "startLaneIndex": 0,
              "endLaneIndex": 0,
              "points": [
                {
                  "x": 301.5,
                  "y": 595.0
                },
                {
                  "x": 301.363,
                  "y": 595.587
                },
                {
                  "x": 300.984,
                  "y": 596.316
                },
                {
                  "x": 300.411,
                  "y": 597.139
                },
                {
                  "x": 299.692,
                  "y": 598.008
                },
                {
                  "x": 298.875,
                  "y": 598.875
                },
                {
                  "x": 298.008,
                  "y": 599.692
                },
                {
                  "x": 297.139,
                  "y": 600.411
                },
                {
                  "x": 296.316,
                  "y": 600.9839999999999
                },
                {
                  "x": 295.587,
                  "y": 601.363
                },
                {
                  "x": 295.0,
                  "y": 601.5
                }
              ]
            },
            {
              "startLaneIndex": 0,
              "endLaneIndex": 1,
              "points": [
                {
                  "x": 301.5,
                  "y": 595.0
                },
                {
                  "x": 301.363,
                  "y": 595.671
                },
                {
                  "x": 300.984,
                  "y": 596.628
                },
                {
                  "x": 300.411,
                  "y": 597.787
                },
                {
                  "x": 299.692,
                  "y": 599.064
                },
                {
                  "x": 298.875,
                  "y": 600.375
                },
                {
                  "x": 298.008,
                  "y": 601.636
                },
                {
                  "x": 297.139,
                  "y": 602.763
                },
                {
                  "x": 296.316,
                  "y": 603.6719999999999
                },
                {
                  "x": 295.587,
                  "y": 604.279
                },
                {
                  "x": 295.0,
                  "y": 604.5
                }
              ]
            },
            {
              "startLaneIndex": 0,
              "endLaneIndex": 2,
              "points": [
                {
                  "x": 301.5,
                  "y": 595.0
                },
                {
                  "x": 301.363,
                  "y": 595.755
                },
                {
                  "x": 300.984,
                  "y": 596.94
                },
                {
                  "x": 300.411,
                  "y": 598.435
                },
                {
                  "x": 299.692,
                  "y": 600.12
                },
                {
                  "x": 298.875,
                  "y": 601.875
                },
                {
                  "x": 298.008,
                  "y": 603.58
                },
                {
                  "x": 297.139,
                  "y": 605.115
                },
                {
                  "x": 296.316,
                  "y": 606.3599999999999
                },
                {
                  "x": 295.587,
                  "y": 607.1949999999999
                },
                {
                  "x": 295.0,
                  "y": 607.5
                }
              ]
            }
          ]
        },
        {
          "type": "go_straight",
          "startRoad": "road_3_3_2",
          "endRoad": "road_2_3_2",
          "direction": 2,
          "laneLinks": [
            {
              "startLaneIndex": 1,
              "endLaneIndex": 0,
              "points": [
                {
                  "x": 305.0,
                  "y": 604.5
                },
                {
                  "x": 304.36,
                  "y": 604.4159999999999
                },
                {
                  "x": 303.48,
                  "y": 604.188
                },
                {
                  "x": 302.42,
                  "y": 603.852
                },
                {
                  "x": 301.24,
                  "y": 603.444
                },
                {
                  "x": 300.0,
                  "y": 603.0
                },
                {
                  "x": 298.76,
                  "y": 602.556
                },
                {
                  "x": 297.58,
                  "y": 602.148
                },
                {
                  "x": 296.52,
                  "y": 601.8119999999999
                },
                {
                  "x": 295.64,
                  "y": 601.584
                },
                {
                  "x": 295.0,
                  "y": 601.5
                }
              ]
            },
            {
              "startLaneIndex": 1,
              "endLaneIndex": 1,
              "points": [
                {
                  "x": 305.0,
                  "y": 604.5
                },
                {
                  "x": 304.36,
                  "y": 604.5
                },
                {
                  "x": 303.48,
                  "y": 604.5
                },
                {
                  "x": 302.42,
                  "y": 604.5
                },
                {
                  "x": 301.24,
                  "y": 604.5
                },
                {
                  "x": 300.0,
                  "y": 604.5
                },
                {
                  "x": 298.76,
                  "y": 604.5
                },
                {
                  "x": 297.58,
                  "y": 604.5
                },
                {
                  "x": 296.52,
                  "y": 604.4999999999999
                },
                {
                  "x": 295.64,
                  "y": 604.5
                },
                {
                  "x": 295.0,
                  "y": 604.5
                }
              ]
            },
            {
              "startLaneIndex": 1,
              "endLaneIndex": 2,
              "points": [
                {
                  "x": 305.0,
                  "y": 604.5
                },
                {
                  "x": 304.36,
                  "y": 604.584
                },
                {
                  "x": 303.48,
                  "y": 604.812
                },
                {
                  "x": 302.42,
                  "y": 605.148
                },
                {
                  "x": 301.24,
                  "y": 605.556
                },
                {
                  "x": 300.0,
                  "y": 606.0
                },
                {
                  "x": 298.76,
                  "y": 606.444
                },
                {
                  "x": 297.58,
                  "y": 606.852
                },
                {
                  "x": 296.52,
                  "y": 607.1879999999999
                },
                {
                  "x": 295.64,
                  "y": 607.4159999999999
                },
                {
                  "x": 295.0,
                  "y": 607.5
                }
              ]
            },
            {
              "startLaneIndex": 2,
              "endLaneIndex": 0,
              "points": [
                {
                  "x": 305.0,
                  "y": 607.5
                },
                {
                  "x": 304.36,
                  "y": 607.332
                },
                {
                  "x": 303.48,
                  "y": 606.876
                },
                {
                  "x": 302.42,
                  "y": 606.204
                },
                {
                  "x": 301.24,
                  "y": 605.388
                },
                {
                  "x": 300.0,
                  "y": 604.5
                },
                {
                  "x": 298.76,
                  "y": 603.612
                },
                {
                  "x": 297.58,
                  "y": 602.796
                },
                {
                  "x": 296.52,
                  "y": 602.1239999999999
                },
                {
                  "x": 295.64,
                  "y": 601.668
                },
                {
                  "x": 295.0,
                  "y": 601.5
                }
              ]
            },
            {
              "startLaneIndex": 2,
              "endLaneIndex": 1,
              "points": [
                {
                  "x": 305.0,
                  "y": 607.5
                },
                {
                  "x": 304.36,
                  "y": 607.4159999999999
                },
                {
                  "x": 303.48,
                  "y": 607.188
                },
                {
                  "x": 302.42,
                  "y": 606.852
                },
                {
                  "x": 301.24,
                  "y": 606.444
                },
                {
                  "x": 300.0,
                  "y": 606.0
                },
                {
                  "x": 298.76,
                  "y": 605.556
                },
                {
                  "x": 297.58,
                  "y": 605.148
                },
                {
                  "x": 296.52,
                  "y": 604.8119999999999
                },
                {
                  "x": 295.64,
                  "y": 604.584
                },
                {
                  "x": 295.0,
                  "y": 604.5
                }
              ]
            },
            {
              "startLaneIndex": 2,
              "endLaneIndex": 2,
              "points": [
                {
                  "x": 305.0,
                  "y": 607.5
                },
                {
                  "x": 304.36,
                  "y": 607.5
                },
                {
                  "x": 303.48,
                  "y": 607.5
                },
                {
                  "x": 302.42,
                  "y": 607.5
                },
                {
                  "x": 301.24,
                  "y": 607.5
                },
                {
                  "x": 300.0,
                  "y": 607.5
                },
                {
                  "x": 298.76,
                  "y": 607.5
                },
                {
                  "x": 297.58,
                  "y": 607.5
                },
                {
                  "x": 296.52,
                  "y": 607.4999999999999
                },
                {
                  "x": 295.64,
                  "y": 607.5
                },
                {
                  "x": 295.0,
                  "y": 607.5
                }
              ]
            }
          ]
        },
        {
          "type": "turn_left",
          "startRoad": "road_3_3_2",
          "endRoad": "road_2_3_3",
          "direction": 2,
          "laneLinks": [
            {
              "startLaneIndex": 0,
              "endLaneIndex": 0,
              "points": [
                {
                  "x": 305.0,
                  "y": 601.5
                },
                {
                  "x": 304.413,
                  "y": 601.363
                },
                {
                  "x": 303.68399999999997,
                  "y": 600.984
                },
                {
                  "x": 302.861,
                  "y": 600.411
                },
                {
                  "x": 301.992,
                  "y": 599.692
                },
                {
                  "x": 301.125,
                  "y": 598.875
                },
                {
                  "x": 300.308,
                  "y": 598.008
                },
                {
                  "x": 299.589,
                  "y": 597.139
                },
                {
                  "x": 299.016,
                  "y": 596.3159999999999
                },
                {
                  "x": 298.637,
                  "y": 595.587
                },
                {
                  "x": 298.5,
                  "y": 595.0
                }
              ]
            },
            {
              "startLaneIndex": 0,
              "endLaneIndex": 1,
              "points": [
                {
                  "x": 305.0,
                  "y": 601.5
                },
                {
                  "x": 304.329,
                  "y": 601.363
                },
                {
                  "x": 303.372,
                  "y": 600.984
                },
                {
                  "x": 302.213,
                  "y": 600.411
                },
                {
                  "x": 300.936,
                  "y": 599.692
                },
                {
                  "x": 299.625,
                  "y": 598.875
                },
                {
                  "x": 298.364,
                  "y": 598.008
                },
                {
                  "x": 297.237,
                  "y": 597.139
                },
                {
                  "x": 296.328,
                  "y": 596.3159999999999
                },
                {
                  "x": 295.721,
                  "y": 595.587
                },
                {
                  "x": 295.5,
                  "y": 595.0
                }
              ]
            },
            {
              "startLaneIndex": 0,
              "endLaneIndex": 2,
              "points": [
                {
                  "x": 305.0,
                  "y": 601.5
                },
                {
                  "x": 304.245,
                  "y": 601.363
                },
                {
                  "x": 303.06,
                  "y": 600.984
                },
                {
                  "x": 301.565,
                  "y": 600.411
                },
                {
                  "x": 299.88,
                  "y": 599.692
                },
                {
                  "x": 298.125,
                  "y": 598.875
                },
                {
                  "x": 296.42,
                  "y": 598.008
                },
                {
                  "x": 294.885,
                  "y": 597.139
                },
                {
                  "x": 293.64,
                  "y": 596.3159999999999
                },
                {
                  "x": 292.805,
                  "y": 595.587
                },
                {
                  "x": 292.5,
                  "y": 595.0
                }
              ]
            }
          ]
        },
        {
          "type": "turn_left",
          "startRoad": "road_2_4_3",
          "endRoad": "road_2_3_0",
          "direction": 3,
          "laneLinks": [
            {
              "startLaneIndex": 0,
              "endLaneIndex": 0,
              "points": [
                {
                  "x": 298.5,
                  "y": 605.0
                },
                {
                  "x": 298.637,
                  "y": 604.413
                },
                {
                  "x": 299.016,
                  "y": 603.684
                },
                {
                  "x": 299.589,
                  "y": 602.861
                },
                {
                  "x": 300.308,
                  "y": 601.992
                },
                {
                  "x": 301.125,
                  "y": 601.125
                },
                {
                  "x": 301.992,
                  "y": 600.308
                },
                {
                  "x": 302.861,
                  "y": 599.5889999999999
                },
                {
                  "x": 303.68399999999997,
                  "y": 599.0159999999998
                },
                {
                  "x": 304.413,
                  "y": 598.637
                },
                {
                  "x": 305.0,
                  "y": 598.5
                }
              ]
            },
            {
              "startLaneIndex": 0,
              "endLaneIndex": 1,
              "points": [
                {
                  "x": 298.5,
                  "y": 605.0
                },
                {
                  "x": 298.637,
                  "y": 604.329
                },
                {
                  "x": 299.016,
                  "y": 603.372
                },
                {
                  "x": 299.589,
                  "y": 602.213
                },
                {
                  "x": 300.308,
                  "y": 600.936
                },
                {
                  "x": 301.125,
                  "y": 599.625
                },
                {
                  "x": 301.992,
                  "y": 598.364
                },
                {
                  "x": 302.861,
                  "y": 597.237
                },
                {
                  "x": 303.68399999999997,
                  "y": 596.3279999999999
                },
                {
                  "x": 304.413,
                  "y": 595.721
                },
                {
                  "x": 305.0,
                  "y": 595.5
                }
              ]
            },
            {
              "startLaneIndex": 0,
              "endLaneIndex": 2,
              "points": [
                {
                  "x": 298.5,
                  "y": 605.0
                },
                {
                  "x": 298.637,
                  "y": 604.245
                },
                {
                  "x": 299.016,
                  "y": 603.06
                },
                {
                  "x": 299.589,
                  "y": 601.565
                },
                {
                  "x": 300.308,
                  "y": 599.88
                },
                {
                  "x": 301.125,
                  "y": 598.125
                },
                {
                  "x": 301.992,
                  "y": 596.42
                },
                {
                  "x": 302.861,
                  "y": 594.885
                },
                {
                  "x": 303.68399999999997,
                  "y": 593.6399999999999
                },
                {
                  "x": 304.413,
                  "y": 592.805
                },
                {
                  "x": 305.0,
                  "y": 592.5
                }
              ]
            }
          ]
        },
        {
          "type": "go_straight",
          "startRoad": "road_2_4_3",
          "endRoad": "road_2_3_3",
          "direction": 3,
          "laneLinks": [
            {
              "startLaneIndex": 1,
              "endLaneIndex": 0,
              "points": [
                {
                  "x": 295.5,
                  "y": 605.0
                },
                {
                  "x": 295.584,
                  "y": 604.36
                },
                {
                  "x": 295.812,
                  "y": 603.48
                },
                {
                  "x": 296.148,
                  "y": 602.42
                },
                {
                  "x": 296.556,
                  "y": 601.24
                },
                {
                  "x": 297.0,
                  "y": 600.0
                },
                {
                  "x": 297.444,
                  "y": 598.76
                },
                {
                  "x": 297.852,
                  "y": 597.58
                },
                {
                  "x": 298.188,
                  "y": 596.5199999999999
                },
                {
                  "x": 298.416,
                  "y": 595.64
                },
                {
                  "x": 298.5,
                  "y": 595.0
                }
              ]
            },
            {
              "startLaneIndex": 1,
              "endLaneIndex": 1,
              "points": [
                {
                  "x": 295.5,
                  "y": 605.0
                },
                {
                  "x": 295.5,
                  "y": 604.36
                },
                {
                  "x": 295.5,
                  "y": 603.48
                },
                {
                  "x": 295.5,
                  "y": 602.42
                },
                {
                  "x": 295.5,
                  "y": 601.24
                },
                {
                  "x": 295.5,
                  "y": 600.0
                },
                {
                  "x": 295.5,
                  "y": 598.76
                },
                {
                  "x": 295.5,
                  "y": 597.58
                },
                {
                  "x": 295.5,
                  "y": 596.5199999999999
                },
                {
                  "x": 295.5,
                  "y": 595.64
                },
                {
                  "x": 295.5,
                  "y": 595.0
                }
              ]
            },
            {
              "startLaneIndex": 1,
              "endLaneIndex": 2,
              "points": [
                {
                  "x": 295.5,
                  "y": 605.0
                },
                {
                  "x": 295.416,
                  "y": 604.36
                },
                {
                  "x": 295.188,
                  "y": 603.48
                },
                {
                  "x": 294.852,
                  "y": 602.42
                },
                {
                  "x": 294.444,
                  "y": 601.24
                },
                {
                  "x": 294.0,
                  "y": 600.0
                },
                {
                  "x": 293.556,
                  "y": 598.76
                },
                {
                  "x": 293.148,
                  "y": 597.58
                },
                {
                  "x": 292.812,
                  "y": 596.5199999999999
                },
                {
                  "x": 292.584,
                  "y": 595.64
                },
                {
                  "x": 292.5,
                  "y": 595.0
                }
              ]
            },
            {
              "startLaneIndex": 2,
              "endLaneIndex": 0,
              "points": [
                {
                  "x": 292.5,
                  "y": 605.0
                },
                {
                  "x": 292.668,
                  "y": 604.36
                },
                {
                  "x": 293.124,
                  "y": 603.48
                },
                {
                  "x": 293.796,
                  "y": 602.42
                },
                {
                  "x": 294.612,
                  "y": 601.24
                },
                {
                  "x": 295.5,
                  "y": 600.0
                },
                {
                  "x": 296.388,
                  "y": 598.76
                },
                {
                  "x": 297.204,
                  "y": 597.58
                },
                {
                  "x": 297.876,
                  "y": 596.5199999999999
                },
                {
                  "x": 298.332,
                  "y": 595.64
                },
                {
                  "x": 298.5,
                  "y": 595.0
                }
              ]
            },
            {
              "startLaneIndex": 2,
              "endLaneIndex": 1,
              "points": [
                {
                  "x": 292.5,
                  "y": 605.0
                },
                {
                  "x": 292.584,
                  "y": 604.36
                },
                {
                  "x": 292.812,
                  "y": 603.48
                },
                {
                  "x": 293.148,
                  "y": 602.42
                },
                {
                  "x": 293.556,
                  "y": 601.24
                },
                {
                  "x": 294.0,
                  "y": 600.0
                },
                {
                  "x": 294.444,
                  "y": 598.76
                },
                {
                  "x": 294.852,
                  "y": 597.58
                },
                {
                  "x": 295.188,
                  "y": 596.5199999999999
                },
                {
                  "x": 295.416,
                  "y": 595.64
                },
                {
                  "x": 295.5,
                  "y": 595.0
                }
              ]
            },
            {
              "startLaneIndex": 2,
              "endLaneIndex": 2,
              "points": [
                {
                  "x": 292.5,
                  "y": 605.0
                },
                {
                  "x": 292.5,
                  "y": 604.36
                },
                {
                  "x": 292.5,
                  "y": 603.48
                },
                {
                  "x": 292.5,
                  "y": 602.42
                },
                {
                  "x": 292.5,
                  "y": 601.24
                },
                {
                  "x": 292.5,
                  "y": 600.0
                },
                {
                  "x": 292.5,
                  "y": 598.76
                },
                {
                  "x": 292.5,
                  "y": 597.58
                },
                {
                  "x": 292.5,
                  "y": 596.5199999999999
                },
                {
                  "x": 292.5,
                  "y": 595.64
                },
                {
                  "x": 292.5,
                  "y": 595.0
                }
              ]
            }
          ]
        }
      ],
      "trafficLight": {
        "roadLinkIndices": [
          0,
          1,
          2,
          3,
          4,
          5,
          6,
          7
        ],
        "lightphases": [
          {
            "time": 5,
            "availableRoadLinks": []
          },
          {
            "time": 30,
            "availableRoadLinks": [
              0,
              4
            ]
          },
          {
            "time": 30,
            "availableRoadLinks": [
              2,
              7
            ]
          },
          {
            "time": 30,
            "availableRoadLinks": [
              1,
              5
            ]
          },
          {
            "time": 30,
            "availableRoadLinks": [
              3,
              6
            ]
          },
          {
            "time": 30,
            "availableRoadLinks": [
              0,
              1
            ]
          },
          {
            "time": 30,
            "availableRoadLinks": [
              4,
              5
            ]
          },
          {
            "time": 30,
            "availableRoadLinks": [
              2,
              3
            ]
          },
          {
            "time": 30,
            "availableRoadLinks": [
              6,
              7
            ]
          }
        ]
      },
      "virtual": false
    },
    {
      "id": "intersection_2_4",
      "point": {
        "x": 300,
        "y": 900
      },
      "width": 0,
      "roads": [
        "road_2_3_1",
        "road_2_4_3"
      ],
      "roadLinks": [],
      "trafficLight": {
        "roadLinkIndices": [],
        "lightphases": [
          {
            "time": 5,
            "availableRoadLinks": []
          },
          {
            "time": 30,
            "availableRoadLinks": []
          },
          {
            "time": 30,
            "availableRoadLinks": []
          },
          {
            "time": 30,
            "availableRoadLinks": []
          },
          {
            "time": 30,
            "availableRoadLinks": []
          },
          {
            "time": 30,
            "availableRoadLinks": []
          },
          {
            "time": 30,
            "availableRoadLinks": []
          },
          {
            "time": 30,
            "availableRoadLinks": []
          },
          {
            "time": 30,
            "availableRoadLinks": []
          }
        ]
      },
      "virtual": true
    },
    {
      "id": "intersection_3_0",
      "point": {
        "x": 600,
        "y": -300
      },
      "width": 0,
      "roads": [
        "road_3_1_3",
        "road_3_0_1"
      ],
      "roadLinks": [],
      "trafficLight": {
        "roadLinkIndices": [],
        "lightphases": [
          {
            "time": 5,
            "availableRoadLinks": []
          },
          {
            "time": 30,
            "availableRoadLinks": []
          },
          {
            "time": 30,
            "availableRoadLinks": []
          },
          {
            "time": 30,
            "availableRoadLinks": []
          },
          {
            "time": 30,
            "availableRoadLinks": []
          },
          {
            "time": 30,
            "availableRoadLinks": []
          },
          {
            "time": 30,
            "availableRoadLinks": []
          },
          {
            "time": 30,
            "availableRoadLinks": []
          },
          {
            "time": 30,
            "availableRoadLinks": []
          }
        ]
      },
      "virtual": true
    },
    {
      "id": "intersection_3_1",
      "point": {
        "x": 600,
        "y": 0
      },
      "width": 5,
      "roads": [
        "road_2_1_0",
        "road_3_0_1",
        "road_4_1_2",
        "road_3_2_3",
        "road_3_1_0",
        "road_3_1_1",
        "road_3_1_2",
        "road_3_1_3"
      ],
      "roadLinks": [
        {
          "type": "go_straight",
          "startRoad": "road_2_1_0",
          "endRoad": "road_3_1_0",
          "direction": 0,
          "laneLinks": [
            {
              "startLaneIndex": 1,
              "endLaneIndex": 0,
              "points": [
                {
                  "x": 595.0,
                  "y": -4.5
                },
                {
                  "x": 595.64,
                  "y": -4.416
                },
                {
                  "x": 596.52,
                  "y": -4.188
                },
                {
                  "x": 597.58,
                  "y": -3.852
                },
                {
                  "x": 598.76,
                  "y": -3.444
                },
                {
                  "x": 600.0,
                  "y": -3.0
                },
                {
                  "x": 601.24,
                  "y": -2.556
                },
                {
                  "x": 602.42,
                  "y": -2.148
                },
                {
                  "x": 603.4799999999999,
                  "y": -1.811999999999999
                },
                {
                  "x": 604.36,
                  "y": -1.584
                },
                {
                  "x": 605.0,
                  "y": -1.5
                }
              ]
            },
            {
              "startLaneIndex": 1,
              "endLaneIndex": 1,
              "points": [
                {
                  "x": 595.0,
                  "y": -4.5
                },
                {
                  "x": 595.64,
                  "y": -4.5
                },
                {
                  "x": 596.52,
                  "y": -4.5
                },
                {
                  "x": 597.58,
                  "y": -4.5
                },
                {
                  "x": 598.76,
                  "y": -4.5
                },
                {
                  "x": 600.0,
                  "y": -4.5
                },
                {
                  "x": 601.24,
                  "y": -4.5
                },
                {
                  "x": 602.42,
                  "y": -4.5
                },
                {
                  "x": 603.4799999999999,
                  "y": -4.499999999999999
                },
                {
                  "x": 604.36,
                  "y": -4.5
                },
                {
                  "x": 605.0,
                  "y": -4.5
                }
              ]
            },
            {
              "startLaneIndex": 1,
              "endLaneIndex": 2,
              "points": [
                {
                  "x": 595.0,
                  "y": -4.5
                },
                {
                  "x": 595.64,
                  "y": -4.584
                },
                {
                  "x": 596.52,
                  "y": -4.812
                },
                {
                  "x": 597.58,
                  "y": -5.148
                },
                {
                  "x": 598.76,
                  "y": -5.556
                },
                {
                  "x": 600.0,
                  "y": -6.0
                },
                {
                  "x": 601.24,
                  "y": -6.444
                },
                {
                  "x": 602.42,
                  "y": -6.852
                },
                {
                  "x": 603.4799999999999,
                  "y": -7.187999999999999
                },
                {
                  "x": 604.36,
                  "y": -7.416
                },
                {
                  "x": 605.0,
                  "y": -7.5
                }
              ]
            },
            {
              "startLaneIndex": 2,
              "endLaneIndex": 0,
              "points": [
                {
                  "x": 595.0,
                  "y": -7.5
                },
                {
                  "x": 595.64,
                  "y": -7.332
                },
                {
                  "x": 596.52,
                  "y": -6.876
                },
                {
                  "x": 597.58,
                  "y": -6.204
                },
                {
                  "x": 598.76,
                  "y": -5.388
                },
                {
                  "x": 600.0,
                  "y": -4.5
                },
                {
                  "x": 601.24,
                  "y": -3.612
                },
                {
                  "x": 602.42,
                  "y": -2.796
                },
                {
                  "x": 603.4799999999999,
                  "y": -2.124
                },
                {
                  "x": 604.36,
                  "y": -1.668
                },
                {
                  "x": 605.0,
                  "y": -1.5
                }
              ]
            },
            {
              "startLaneIndex": 2,
              "endLaneIndex": 1,
              "points": [
                {
                  "x": 595.0,
                  "y": -7.5
                },
                {
                  "x": 595.64,
                  "y": -7.416
                },
                {
                  "x": 596.52,
                  "y": -7.188
                },
                {
                  "x": 597.58,
                  "y": -6.852
                },
                {
                  "x": 598.76,
                  "y": -6.444
                },
                {
                  "x": 600.0,
                  "y": -6.0
                },
                {
                  "x": 601.24,
                  "y": -5.556
                },
                {
                  "x": 602.42,
                  "y": -5.148
                },
                {
                  "x": 603.4799999999999,
                  "y": -4.812
                },
                {
                  "x": 604.36,
                  "y": -4.584
                },
                {
                  "x": 605.0,
                  "y": -4.5
                }
              ]
            },
            {
              "startLaneIndex": 2,
              "endLaneIndex": 2,
              "points": [
                {
                  "x": 595.0,
                  "y": -7.5
                },
                {
                  "x": 595.64,
                  "y": -7.5
                },
                {
                  "x": 596.52,
                  "y": -7.5
                },
                {
                  "x": 597.58,
                  "y": -7.5
                },
                {
                  "x": 598.76,
                  "y": -7.5
                },
                {
                  "x": 600.0,
                  "y": -7.5
                },
                {
                  "x": 601.24,
                  "y": -7.5
                },
                {
                  "x": 602.42,
                  "y": -7.5
                },
                {
                  "x": 603.4799999999999,
                  "y": -7.5
                },
                {
                  "x": 604.36,
                  "y": -7.5
                },
                {
                  "x": 605.0,
                  "y": -7.5
                }
              ]
            }
          ]
        },
        {
          "type": "turn_left",
          "startRoad": "road_2_1_0",
          "endRoad": "road_3_1_1",
          "direction": 0,
          "laneLinks": [
            {
              "startLaneIndex": 0,
              "endLaneIndex": 0,
              "points": [
                {
                  "x": 595.0,
                  "y": -1.5
                },
                {
                  "x": 595.587,
                  "y": -1.363
                },
                {
                  "x": 596.316,
                  "y": -0.984
                },
                {
                  "x": 597.139,
                  "y": -0.411
                },
                {
                  "x": 598.008,
                  "y": 0.308
                },
                {
                  "x": 598.875,
                  "y": 1.125
                },
                {
                  "x": 599.692,
                  "y": 1.992
                },
                {
                  "x": 600.411,
                  "y": 2.8609999999999998
                },
                {
                  "x": 600.9839999999999,
                  "y": 3.684
                },
                {
                  "x": 601.363,
                  "y": 4.413
                },
                {
                  "x": 601.5,
                  "y": 5.0
                }
              ]
            },
            {
              "startLaneIndex": 0,
              "endLaneIndex": 1,
              "points": [
                {
                  "x": 595.0,
                  "y": -1.5
                },
                {
                  "x": 595.671,
                  "y": -1.363
                },
                {
                  "x": 596.628,
                  "y": -0.984
                },
                {
                  "x": 597.787,
                  "y": -0.411
                },
                {
                  "x": 599.064,
                  "y": 0.308
                },
                {
                  "x": 600.375,
                  "y": 1.125
                },
                {
                  "x": 601.636,
                  "y": 1.992
                },
                {
                  "x": 602.763,
                  "y": 2.8609999999999998
                },
                {
                  "x": 603.6719999999999,
                  "y": 3.684
                },
                {
                  "x": 604.279,
                  "y": 4.413
                },
                {
                  "x": 604.5,
                  "y": 5.0
                }
              ]
            },
            {
              "startLaneIndex": 0,
              "endLaneIndex": 2,
              "points": [
                {
                  "x": 595.0,
                  "y": -1.5
                },
                {
                  "x": 595.755,
                  "y": -1.363
                },
                {
                  "x": 596.94,
                  "y": -0.984
                },
                {
                  "x": 598.435,
                  "y": -0.411
                },
                {
                  "x": 600.12,
                  "y": 0.308
                },
                {
                  "x": 601.875,
                  "y": 1.125
                },
                {
                  "x": 603.58,
                  "y": 1.992
                },
                {
                  "x": 605.115,
                  "y": 2.8609999999999998
                },
                {
                  "x": 606.3599999999999,
                  "y": 3.684
                },
                {
                  "x": 607.1949999999999,
                  "y": 4.413
                },
                {
                  "x": 607.5,
                  "y": 5.0
                }
              ]
            }
          ]
        },
        {
          "type": "go_straight",
          "startRoad": "road_3_0_1",
          "endRoad": "road_3_1_1",
          "direction": 1,
          "laneLinks": [
            {
              "startLaneIndex": 1,
              "endLaneIndex": 0,
              "points": [
                {
                  "x": 604.5,
                  "y": -5.0
                },
                {
                  "x": 604.4159999999999,
                  "y": -4.36
                },
                {
                  "x": 604.188,
                  "y": -3.48
                },
                {
                  "x": 603.852,
                  "y": -2.42
                },
                {
                  "x": 603.444,
                  "y": -1.24
                },
                {
                  "x": 603.0,
                  "y": 0.0
                },
                {
                  "x": 602.556,
                  "y": 1.24
                },
                {
                  "x": 602.148,
                  "y": 2.42
                },
                {
                  "x": 601.8119999999999,
                  "y": 3.48
                },
                {
                  "x": 601.584,
                  "y": 4.36
                },
                {
                  "x": 601.5,
                  "y": 5.0
                }
              ]
            },
            {
              "startLaneIndex": 1,
              "endLaneIndex": 1,
              "points": [
                {
                  "x": 604.5,
                  "y": -5.0
                },
                {
                  "x": 604.5,
                  "y": -4.36
                },
                {
                  "x": 604.5,
                  "y": -3.48
                },
                {
                  "x": 604.5,
                  "y": -2.42
                },
                {
                  "x": 604.5,
                  "y": -1.24
                },
                {
                  "x": 604.5,
                  "y": 0.0
                },
                {
                  "x": 604.5,
                  "y": 1.24
                },
                {
                  "x": 604.5,
                  "y": 2.42
                },
                {
                  "x": 604.4999999999999,
                  "y": 3.48
                },
                {
                  "x": 604.5,
                  "y": 4.36
                },
                {
                  "x": 604.5,
                  "y": 5.0
                }
              ]
            },
            {
              "startLaneIndex": 1,
              "endLaneIndex": 2,
              "points": [
                {
                  "x": 604.5,
                  "y": -5.0
                },
                {
                  "x": 604.584,
                  "y": -4.36
                },
                {
                  "x": 604.812,
                  "y": -3.48
                },
                {
                  "x": 605.148,
                  "y": -2.42
                },
                {
                  "x": 605.556,
                  "y": -1.24
                },
                {
                  "x": 606.0,
                  "y": 0.0
                },
                {
                  "x": 606.444,
                  "y": 1.24
                },
                {
                  "x": 606.852,
                  "y": 2.42
                },
                {
                  "x": 607.1879999999999,
                  "y": 3.48
                },
                {
                  "x": 607.4159999999999,
                  "y": 4.36
                },
                {
                  "x": 607.5,
                  "y": 5.0
                }
              ]
            },
            {
              "startLaneIndex": 2,
              "endLaneIndex": 0,
              "points": [
                {
                  "x": 607.5,
                  "y": -5.0
                },
                {
                  "x": 607.332,
                  "y": -4.36
                },
                {
                  "x": 606.876,
                  "y": -3.48
                },
                {
                  "x": 606.204,
                  "y": -2.42
                },
                {
                  "x": 605.388,
                  "y": -1.24
                },
                {
                  "x": 604.5,
                  "y": 0.0
                },
                {
                  "x": 603.612,
                  "y": 1.24
                },
                {
                  "x": 602.796,
                  "y": 2.42
                },
                {
                  "x": 602.1239999999999,
                  "y": 3.48
                },
                {
                  "x": 601.668,
                  "y": 4.36
                },
                {
                  "x": 601.5,
                  "y": 5.0
                }
              ]
            },
            {
              "startLaneIndex": 2,
              "endLaneIndex": 1,
              "points": [
                {
                  "x": 607.5,
                  "y": -5.0
                },
                {
                  "x": 607.4159999999999,
                  "y": -4.36
                },
                {
                  "x": 607.188,
                  "y": -3.48
                },
                {
                  "x": 606.852,
                  "y": -2.42
                },
                {
                  "x": 606.444,
                  "y": -1.24
                },
                {
                  "x": 606.0,
                  "y": 0.0
                },
                {
                  "x": 605.556,
                  "y": 1.24
                },
                {
                  "x": 605.148,
                  "y": 2.42
                },
                {
                  "x": 604.8119999999999,
                  "y": 3.48
                },
                {
                  "x": 604.584,
                  "y": 4.36
                },
                {
                  "x": 604.5,
                  "y": 5.0
                }
              ]
            },
            {
              "startLaneIndex": 2,
              "endLaneIndex": 2,
              "points": [
                {
                  "x": 607.5,
                  "y": -5.0
                },
                {
                  "x": 607.5,
                  "y": -4.36
                },
                {
                  "x": 607.5,
                  "y": -3.48
                },
                {
                  "x": 607.5,
                  "y": -2.42
                },
                {
                  "x": 607.5,
                  "y": -1.24
                },
                {
                  "x": 607.5,
                  "y": 0.0
                },
                {
                  "x": 607.5,
                  "y": 1.24
                },
                {
                  "x": 607.5,
                  "y": 2.42
                },
                {
                  "x": 607.4999999999999,
                  "y": 3.48
                },
                {
                  "x": 607.5,
                  "y": 4.36
                },
                {
                  "x": 607.5,
                  "y": 5.0
                }
              ]
            }
          ]
        },
        {
          "type": "turn_left",
          "startRoad": "road_3_0_1",
          "endRoad": "road_3_1_2",
          "direction": 1,
          "laneLinks": [
            {
              "startLaneIndex": 0,
              "endLaneIndex": 0,
              "points": [
                {
                  "x": 601.5,
                  "y": -5.0
                },
                {
                  "x": 601.363,
                  "y": -4.413
                },
                {
                  "x": 600.984,
                  "y": -3.684
                },
                {
                  "x": 600.411,
                  "y": -2.8609999999999998
                },
                {
                  "x": 599.692,
                  "y": -1.992
                },
                {
                  "x": 598.875,
                  "y": -1.125
                },
                {
                  "x": 598.008,
                  "y": -0.308
                },
                {
                  "x": 597.139,
                  "y": 0.411
                },
                {
                  "x": 596.3159999999999,
                  "y": 0.984
                },
                {
                  "x": 595.587,
                  "y": 1.363
                },
                {
                  "x": 595.0,
                  "y": 1.5
                }
              ]
            },
            {
              "startLaneIndex": 0,
              "endLaneIndex": 1,
              "points": [
                {
                  "x": 601.5,
                  "y": -5.0
                },
                {
                  "x": 601.363,
                  "y": -4.329
                },
                {
                  "x": 600.984,
                  "y": -3.372
                },
                {
                  "x": 600.411,
                  "y": -2.213
                },
                {
                  "x": 599.692,
                  "y": -0.9359999999999999
                },
                {
                  "x": 598.875,
                  "y": 0.375
                },
                {
                  "x": 598.008,
                  "y": 1.636
                },
                {
                  "x": 597.139,
                  "y": 2.763
                },
                {
                  "x": 596.3159999999999,
                  "y": 3.672
                },
                {
                  "x": 595.587,
                  "y": 4.279
                },
                {
                  "x": 595.0,
                  "y": 4.5
                }
              ]
            },
            {
              "startLaneIndex": 0,
              "endLaneIndex": 2,
              "points": [
                {
                  "x": 601.5,
                  "y": -5.0
                },
                {
                  "x": 601.363,
                  "y": -4.245
                },
                {
                  "x": 600.984,
                  "y": -3.06
                },
                {
                  "x": 600.411,
                  "y": -1.565
                },
                {
                  "x": 599.692,
                  "y": 0.12
                },
                {
                  "x": 598.875,
                  "y": 1.875
                },
                {
                  "x": 598.008,
                  "y": 3.58
                },
                {
                  "x": 597.139,
                  "y": 5.115
                },
                {
                  "x": 596.3159999999999,
                  "y": 6.36
                },
                {
                  "x": 595.587,
                  "y": 7.195
                },
                {
                  "x": 595.0,
                  "y": 7.5
                }
              ]
            }
          ]
        },
        {
          "type": "go_straight",
          "startRoad": "road_4_1_2",
          "endRoad": "road_3_1_2",
          "direction": 2,
          "laneLinks": [
            {
              "startLaneIndex": 1,
              "endLaneIndex": 0,
              "points": [
                {
                  "x": 605.0,
                  "y": 4.5
                },
                {
                  "x": 604.36,
                  "y": 4.416
                },
                {
                  "x": 603.48,
                  "y": 4.188
                },
                {
                  "x": 602.42,
                  "y": 3.852
                },
                {
                  "x": 601.24,
                  "y": 3.444
                },
                {
                  "x": 600.0,
                  "y": 3.0
                },
                {
                  "x": 598.76,
                  "y": 2.556
                },
                {
                  "x": 597.58,
                  "y": 2.148
                },
                {
                  "x": 596.5199999999999,
                  "y": 1.811999999999999
                },
                {
                  "x": 595.64,
                  "y": 1.584
                },
                {
                  "x": 595.0,
                  "y": 1.5
                }
              ]
            },
            {
              "startLaneIndex": 1,
              "endLaneIndex": 1,
              "points": [
                {
                  "x": 605.0,
                  "y": 4.5
                },
                {
                  "x": 604.36,
                  "y": 4.5
                },
                {
                  "x": 603.48,
                  "y": 4.5
                },
                {
                  "x": 602.42,
                  "y": 4.5
                },
                {
                  "x": 601.24,
                  "y": 4.5
                },
                {
                  "x": 600.0,
                  "y": 4.5
                },
                {
                  "x": 598.76,
                  "y": 4.5
                },
                {
                  "x": 597.58,
                  "y": 4.5
                },
                {
                  "x": 596.5199999999999,
                  "y": 4.499999999999999
                },
                {
                  "x": 595.64,
                  "y": 4.5
                },
                {
                  "x": 595.0,
                  "y": 4.5
                }
              ]
            },
            {
              "startLaneIndex": 1,
              "endLaneIndex": 2,
              "points": [
                {
                  "x": 605.0,
                  "y": 4.5
                },
                {
                  "x": 604.36,
                  "y": 4.584
                },
                {
                  "x": 603.48,
                  "y": 4.812
                },
                {
                  "x": 602.42,
                  "y": 5.148
                },
                {
                  "x": 601.24,
                  "y": 5.556
                },
                {
                  "x": 600.0,
                  "y": 6.0
                },
                {
                  "x": 598.76,
                  "y": 6.444
                },
                {
                  "x": 597.58,
                  "y": 6.852
                },
                {
                  "x": 596.5199999999999,
                  "y": 7.187999999999999
                },
                {
                  "x": 595.64,
                  "y": 7.416
                },
                {
                  "x": 595.0,
                  "y": 7.5
                }
              ]
            },
            {
              "startLaneIndex": 2,
              "endLaneIndex": 0,
              "points": [
                {
                  "x": 605.0,
                  "y": 7.5
                },
                {
                  "x": 604.36,
                  "y": 7.332
                },
                {
                  "x": 603.48,
                  "y": 6.876
                },
                {
                  "x": 602.42,
                  "y": 6.204
                },
                {
                  "x": 601.24,
                  "y": 5.388
                },
                {
                  "x": 600.0,
                  "y": 4.5
                },
                {
                  "x": 598.76,
                  "y": 3.612
                },
                {
                  "x": 597.58,
                  "y": 2.796
                },
                {
                  "x": 596.5199999999999,
                  "y": 2.124
                },
                {
                  "x": 595.64,
                  "y": 1.668
                },
                {
                  "x": 595.0,
                  "y": 1.5
                }
              ]
            },
            {
              "startLaneIndex": 2,
              "endLaneIndex": 1,
              "points": [
                {
                  "x": 605.0,
                  "y": 7.5
                },
                {
                  "x": 604.36,
                  "y": 7.416
                },
                {
                  "x": 603.48,
                  "y": 7.188
                },
                {
                  "x": 602.42,
                  "y": 6.852
                },
                {
                  "x": 601.24,
                  "y": 6.444
                },
                {
                  "x": 600.0,
                  "y": 6.0
                },
                {
                  "x": 598.76,
                  "y": 5.556
                },
                {
                  "x": 597.58,
                  "y": 5.148
                },
                {
                  "x": 596.5199999999999,
                  "y": 4.812
                },
                {
                  "x": 595.64,
                  "y": 4.584
                },
                {
                  "x": 595.0,
                  "y": 4.5
                }
              ]
            },
            {
              "startLaneIndex": 2,
              "endLaneIndex": 2,
              "points": [
                {
                  "x": 605.0,
                  "y": 7.5
                },
                {
                  "x": 604.36,
                  "y": 7.5
                },
                {
                  "x": 603.48,
                  "y": 7.5
                },
                {
                  "x": 602.42,
                  "y": 7.5
                },
                {
                  "x": 601.24,
                  "y": 7.5
                },
                {
                  "x": 600.0,
                  "y": 7.5
                },
                {
                  "x": 598.76,
                  "y": 7.5
                },
                {
                  "x": 597.58,
                  "y": 7.5
                },
                {
                  "x": 596.5199999999999,
                  "y": 7.5
                },
                {
                  "x": 595.64,
                  "y": 7.5
                },
                {
                  "x": 595.0,
                  "y": 7.5
                }
              ]
            }
          ]
        },
        {
          "type": "turn_left",
          "startRoad": "road_4_1_2",
          "endRoad": "road_3_1_3",
          "direction": 2,
          "laneLinks": [
            {
              "startLaneIndex": 0,
              "endLaneIndex": 0,
              "points": [
                {
                  "x": 605.0,
                  "y": 1.5
                },
                {
                  "x": 604.413,
                  "y": 1.363
                },
                {
                  "x": 603.684,
                  "y": 0.984
                },
                {
                  "x": 602.861,
                  "y": 0.411
                },
                {
                  "x": 601.992,
                  "y": -0.308
                },
                {
                  "x": 601.125,
                  "y": -1.125
                },
                {
                  "x": 600.308,
                  "y": -1.992
                },
                {
                  "x": 599.5889999999999,
                  "y": -2.8609999999999998
                },
                {
                  "x": 599.0159999999998,
                  "y": -3.684
                },
                {
                  "x": 598.637,
                  "y": -4.413
                },
                {
                  "x": 598.5,
                  "y": -5.0
                }
              ]
            },
            {
              "startLaneIndex": 0,
              "endLaneIndex": 1,
              "points": [
                {
                  "x": 605.0,
                  "y": 1.5
                },
                {
                  "x": 604.329,
                  "y": 1.363
                },
                {
                  "x": 603.372,
                  "y": 0.984
                },
                {
                  "x": 602.213,
                  "y": 0.411
                },
                {
                  "x": 600.936,
                  "y": -0.308
                },
                {
                  "x": 599.625,
                  "y": -1.125
                },
                {
                  "x": 598.364,
                  "y": -1.992
                },
                {
                  "x": 597.237,
                  "y": -2.8609999999999998
                },
                {
                  "x": 596.3279999999999,
                  "y": -3.684
                },
                {
                  "x": 595.721,
                  "y": -4.413
                },
                {
                  "x": 595.5,
                  "y": -5.0
                }
              ]
            },
            {
              "startLaneIndex": 0,
              "endLaneIndex": 2,
              "points": [
                {
                  "x": 605.0,
                  "y": 1.5
                },
                {
                  "x": 604.245,
                  "y": 1.363
                },
                {
                  "x": 603.06,
                  "y": 0.984
                },
                {
                  "x": 601.565,
                  "y": 0.411
                },
                {
                  "x": 599.88,
                  "y": -0.308
                },
                {
                  "x": 598.125,
                  "y": -1.125
                },
                {
                  "x": 596.42,
                  "y": -1.992
                },
                {
                  "x": 594.885,
                  "y": -2.8609999999999998
                },
                {
                  "x": 593.6399999999999,
                  "y": -3.684
                },
                {
                  "x": 592.805,
                  "y": -4.413
                },
                {
                  "x": 592.5,
                  "y": -5.0
                }
              ]
            }
          ]
        },
        {
          "type": "turn_left",
          "startRoad": "road_3_2_3",
          "endRoad": "road_3_1_0",
          "direction": 3,
          "laneLinks": [
            {
              "startLaneIndex": 0,
              "endLaneIndex": 0,
              "points": [
                {
                  "x": 598.5,
                  "y": 5.0
                },
                {
                  "x": 598.637,
                  "y": 4.413
                },
                {
                  "x": 599.016,
                  "y": 3.684
                },
                {
                  "x": 599.5889999999999,
                  "y": 2.8609999999999998
                },
                {
                  "x": 600.308,
                  "y": 1.992
                },
                {
                  "x": 601.125,
                  "y": 1.125
                },
                {
                  "x": 601.992,
                  "y": 0.308
                },
                {
                  "x": 602.861,
                  "y": -0.411
                },
                {
                  "x": 603.6839999999999,
                  "y": -0.984
                },
                {
                  "x": 604.413,
                  "y": -1.363
                },
                {
                  "x": 605.0,
                  "y": -1.5
                }
              ]
            },
            {
              "startLaneIndex": 0,
              "endLaneIndex": 1,
              "points": [
                {
                  "x": 598.5,
                  "y": 5.0
                },
                {
                  "x": 598.637,
                  "y": 4.329
                },
                {
                  "x": 599.016,
                  "y": 3.372
                },
                {
                  "x": 599.5889999999999,
                  "y": 2.213
                },
                {
                  "x": 600.308,
                  "y": 0.9359999999999999
                },
                {
                  "x": 601.125,
                  "y": -0.375
                },
                {
                  "x": 601.992,
                  "y": -1.636
                },
                {
                  "x": 602.861,
                  "y": -2.763
                },
                {
                  "x": 603.6839999999999,
                  "y": -3.672
                },
                {
                  "x": 604.413,
                  "y": -4.279
                },
                {
                  "x": 605.0,
                  "y": -4.5
                }
              ]
            },
            {
              "startLaneIndex": 0,
              "endLaneIndex": 2,
              "points": [
                {
                  "x": 598.5,
                  "y": 5.0
                },
                {
                  "x": 598.637,
                  "y": 4.245
                },
                {
                  "x": 599.016,
                  "y": 3.06
                },
                {
                  "x": 599.5889999999999,
                  "y": 1.565
                },
                {
                  "x": 600.308,
                  "y": -0.12
                },
                {
                  "x": 601.125,
                  "y": -1.875
                },
                {
                  "x": 601.992,
                  "y": -3.58
                },
                {
                  "x": 602.861,
                  "y": -5.115
                },
                {
                  "x": 603.6839999999999,
                  "y": -6.36
                },
                {
                  "x": 604.413,
                  "y": -7.195
                },
                {
                  "x": 605.0,
                  "y": -7.5
                }
              ]
            }
          ]
        },
        {
          "type": "go_straight",
          "startRoad": "road_3_2_3",
          "endRoad": "road_3_1_3",
          "direction": 3,
          "laneLinks": [
            {
              "startLaneIndex": 1,
              "endLaneIndex": 0,
              "points": [
                {
                  "x": 595.5,
                  "y": 5.0
                },
                {
                  "x": 595.584,
                  "y": 4.36
                },
                {
                  "x": 595.812,
                  "y": 3.48
                },
                {
                  "x": 596.148,
                  "y": 2.42
                },
                {
                  "x": 596.556,
                  "y": 1.24
                },
                {
                  "x": 597.0,
                  "y": 0.0
                },
                {
                  "x": 597.444,
                  "y": -1.24
                },
                {
                  "x": 597.852,
                  "y": -2.42
                },
                {
                  "x": 598.1879999999999,
                  "y": -3.48
                },
                {
                  "x": 598.4159999999999,
                  "y": -4.36
                },
                {
                  "x": 598.5,
                  "y": -5.0
                }
              ]
            },
            {
              "startLaneIndex": 1,
              "endLaneIndex": 1,
              "points": [
                {
                  "x": 595.5,
                  "y": 5.0
                },
                {
                  "x": 595.5,
                  "y": 4.36
                },
                {
                  "x": 595.5,
                  "y": 3.48
                },
                {
                  "x": 595.5,
                  "y": 2.42
                },
                {
                  "x": 595.5,
                  "y": 1.24
                },
                {
                  "x": 595.5,
                  "y": 0.0
                },
                {
                  "x": 595.5,
                  "y": -1.24
                },
                {
                  "x": 595.5,
                  "y": -2.42
                },
                {
                  "x": 595.4999999999999,
                  "y": -3.48
                },
                {
                  "x": 595.5,
                  "y": -4.36
                },
                {
                  "x": 595.5,
                  "y": -5.0
                }
              ]
            },
            {
              "startLaneIndex": 1,
              "endLaneIndex": 2,
              "points": [
                {
                  "x": 595.5,
                  "y": 5.0
                },
                {
                  "x": 595.4159999999999,
                  "y": 4.36
                },
                {
                  "x": 595.188,
                  "y": 3.48
                },
                {
                  "x": 594.852,
                  "y": 2.42
                },
                {
                  "x": 594.444,
                  "y": 1.24
                },
                {
                  "x": 594.0,
                  "y": 0.0
                },
                {
                  "x": 593.556,
                  "y": -1.24
                },
                {
                  "x": 593.148,
                  "y": -2.42
                },
                {
                  "x": 592.8119999999999,
                  "y": -3.48
                },
                {
                  "x": 592.584,
                  "y": -4.36
                },
                {
                  "x": 592.5,
                  "y": -5.0
                }
              ]
            },
            {
              "startLaneIndex": 2,
              "endLaneIndex": 0,
              "points": [
                {
                  "x": 592.5,
                  "y": 5.0
                },
                {
                  "x": 592.668,
                  "y": 4.36
                },
                {
                  "x": 593.124,
                  "y": 3.48
                },
                {
                  "x": 593.796,
                  "y": 2.42
                },
                {
                  "x": 594.612,
                  "y": 1.24
                },
                {
                  "x": 595.5,
                  "y": 0.0
                },
                {
                  "x": 596.388,
                  "y": -1.24
                },
                {
                  "x": 597.204,
                  "y": -2.42
                },
                {
                  "x": 597.8759999999999,
                  "y": -3.48
                },
                {
                  "x": 598.332,
                  "y": -4.36
                },
                {
                  "x": 598.5,
                  "y": -5.0
                }
              ]
            },
            {
              "startLaneIndex": 2,
              "endLaneIndex": 1,
              "points": [
                {
                  "x": 592.5,
                  "y": 5.0
                },
                {
                  "x": 592.584,
                  "y": 4.36
                },
                {
                  "x": 592.812,
                  "y": 3.48
                },
                {
                  "x": 593.148,
                  "y": 2.42
                },
                {
                  "x": 593.556,
                  "y": 1.24
                },
                {
                  "x": 594.0,
                  "y": 0.0
                },
                {
                  "x": 594.444,
                  "y": -1.24
                },
                {
                  "x": 594.852,
                  "y": -2.42
                },
                {
                  "x": 595.1879999999999,
                  "y": -3.48
                },
                {
                  "x": 595.4159999999999,
                  "y": -4.36
                },
                {
                  "x": 595.5,
                  "y": -5.0
                }
              ]
            },
            {
              "startLaneIndex": 2,
              "endLaneIndex": 2,
              "points": [
                {
                  "x": 592.5,
                  "y": 5.0
                },
                {
                  "x": 592.5,
                  "y": 4.36
                },
                {
                  "x": 592.5,
                  "y": 3.48
                },
                {
                  "x": 592.5,
                  "y": 2.42
                },
                {
                  "x": 592.5,
                  "y": 1.24
                },
                {
                  "x": 592.5,
                  "y": 0.0
                },
                {
                  "x": 592.5,
                  "y": -1.24
                },
                {
                  "x": 592.5,
                  "y": -2.42
                },
                {
                  "x": 592.4999999999999,
                  "y": -3.48
                },
                {
                  "x": 592.5,
                  "y": -4.36
                },
                {
                  "x": 592.5,
                  "y": -5.0
                }
              ]
            }
          ]
        }
      ],
      "trafficLight": {
        "roadLinkIndices": [
          0,
          1,
          2,
          3,
          4,
          5,
          6,
          7
        ],
        "lightphases": [
          {
            "time": 5,
            "availableRoadLinks": []
          },
          {
            "time": 30,
            "availableRoadLinks": [
              0,
              4
            ]
          },
          {
            "time": 30,
            "availableRoadLinks": [
              2,
              7
            ]
          },
          {
            "time": 30,
            "availableRoadLinks": [
              1,
              5
            ]
          },
          {
            "time": 30,
            "availableRoadLinks": [
              3,
              6
            ]
          },
          {
            "time": 30,
            "availableRoadLinks": [
              0,
              1
            ]
          },
          {
            "time": 30,
            "availableRoadLinks": [
              4,
              5
            ]
          },
          {
            "time": 30,
            "availableRoadLinks": [
              2,
              3
            ]
          },
          {
            "time": 30,
            "availableRoadLinks": [
              6,
              7
            ]
          }
        ]
      },
      "virtual": false
    },
    {
      "id": "intersection_3_2",
      "point": {
        "x": 600,
        "y": 300
      },
      "width": 5,
      "roads": [
        "road_2_2_0",
        "road_3_1_1",
        "road_4_2_2",
        "road_3_3_3",
        "road_3_2_0",
        "road_3_2_1",
        "road_3_2_2",
        "road_3_2_3"
      ],
      "roadLinks": [
        {
          "type": "go_straight",
          "startRoad": "road_2_2_0",
          "endRoad": "road_3_2_0",
          "direction": 0,
          "laneLinks": [
            {
              "startLaneIndex": 1,
              "endLaneIndex": 0,
              "points": [
                {
                  "x": 595.0,
                  "y": 295.5
                },
                {
                  "x": 595.64,
                  "y": 295.584
                },
                {
                  "x": 596.52,
                  "y": 295.812
                },
                {
                  "x": 597.58,
                  "y": 296.148
                },
                {
                  "x": 598.76,
                  "y": 296.556
                },
                {
                  "x": 600.0,
                  "y": 297.0
                },
                {
                  "x": 601.24,
                  "y": 297.444
                },
                {
                  "x": 602.42,
                  "y": 297.852
                },
                {
                  "x": 603.4799999999999,
                  "y": 298.188
                },
                {
                  "x": 604.36,
                  "y": 298.416
                },
                {
                  "x": 605.0,
                  "y": 298.5
                }
              ]
            },
            {
              "startLaneIndex": 1,
              "endLaneIndex": 1,
              "points": [
                {
                  "x": 595.0,
                  "y": 295.5
                },
                {
                  "x": 595.64,
                  "y": 295.5
                },
                {
                  "x": 596.52,
                  "y": 295.5
                },
                {
                  "x": 597.58,
                  "y": 295.5
                },
                {
                  "x": 598.76,
                  "y": 295.5
                },
                {
                  "x": 600.0,
                  "y": 295.5
                },
                {
                  "x": 601.24,
                  "y": 295.5
                },
                {
                  "x": 602.42,
                  "y": 295.5
                },
                {
                  "x": 603.4799999999999,
                  "y": 295.5
                },
                {
                  "x": 604.36,
                  "y": 295.5
                },
                {
                  "x": 605.0,
                  "y": 295.5
                }
              ]
            },
            {
              "startLaneIndex": 1,
              "endLaneIndex": 2,
              "points": [
                {
                  "x": 595.0,
                  "y": 295.5
                },
                {
                  "x": 595.64,
                  "y": 295.416
                },
                {
                  "x": 596.52,
                  "y": 295.188
                },
                {
                  "x": 597.58,
                  "y": 294.852
                },
                {
                  "x": 598.76,
                  "y": 294.444
                },
                {
                  "x": 600.0,
                  "y": 294.0
                },
                {
                  "x": 601.24,
                  "y": 293.556
                },
                {
                  "x": 602.42,
                  "y": 293.148
                },
                {
                  "x": 603.4799999999999,
                  "y": 292.812
                },
                {
                  "x": 604.36,
                  "y": 292.584
                },
                {
                  "x": 605.0,
                  "y": 292.5
                }
              ]
            },
            {
              "startLaneIndex": 2,
              "endLaneIndex": 0,
              "points": [
                {
                  "x": 595.0,
                  "y": 292.5
                },
                {
                  "x": 595.64,
                  "y": 292.668
                },
                {
                  "x": 596.52,
                  "y": 293.124
                },
                {
                  "x": 597.58,
                  "y": 293.796
                },
                {
                  "x": 598.76,
                  "y": 294.612
                },
                {
                  "x": 600.0,
                  "y": 295.5
                },
                {
                  "x": 601.24,
                  "y": 296.388
                },
                {
                  "x": 602.42,
                  "y": 297.204
                },
                {
                  "x": 603.4799999999999,
                  "y": 297.876
                },
                {
                  "x": 604.36,
                  "y": 298.332
                },
                {
                  "x": 605.0,
                  "y": 298.5
                }
              ]
            },
            {
              "startLaneIndex": 2,
              "endLaneIndex": 1,
              "points": [
                {
                  "x": 595.0,
                  "y": 292.5
                },
                {
                  "x": 595.64,
                  "y": 292.584
                },
                {
                  "x": 596.52,
                  "y": 292.812
                },
                {
                  "x": 597.58,
                  "y": 293.148
                },
                {
                  "x": 598.76,
                  "y": 293.556
                },
                {
                  "x": 600.0,
                  "y": 294.0
                },
                {
                  "x": 601.24,
                  "y": 294.444
                },
                {
                  "x": 602.42,
                  "y": 294.852
                },
                {
                  "x": 603.4799999999999,
                  "y": 295.188
                },
                {
                  "x": 604.36,
                  "y": 295.416
                },
                {
                  "x": 605.0,
                  "y": 295.5
                }
              ]
            },
            {
              "startLaneIndex": 2,
              "endLaneIndex": 2,
              "points": [
                {
                  "x": 595.0,
                  "y": 292.5
                },
                {
                  "x": 595.64,
                  "y": 292.5
                },
                {
                  "x": 596.52,
                  "y": 292.5
                },
                {
                  "x": 597.58,
                  "y": 292.5
                },
                {
                  "x": 598.76,
                  "y": 292.5
                },
                {
                  "x": 600.0,
                  "y": 292.5
                },
                {
                  "x": 601.24,
                  "y": 292.5
                },
                {
                  "x": 602.42,
                  "y": 292.5
                },
                {
                  "x": 603.4799999999999,
                  "y": 292.5
                },
                {
                  "x": 604.36,
                  "y": 292.5
                },
                {
                  "x": 605.0,
                  "y": 292.5
                }
              ]
            }
          ]
        },
        {
          "type": "turn_left",
          "startRoad": "road_2_2_0",
          "endRoad": "road_3_2_1",
          "direction": 0,
          "laneLinks": [
            {
              "startLaneIndex": 0,
              "endLaneIndex": 0,
              "points": [
                {
                  "x": 595.0,
                  "y": 298.5
                },
                {
                  "x": 595.587,
                  "y": 298.637
                },
                {
                  "x": 596.316,
                  "y": 299.016
                },
                {
                  "x": 597.139,
                  "y": 299.589
                },
                {
                  "x": 598.008,
                  "y": 300.308
                },
                {
                  "x": 598.875,
                  "y": 301.125
                },
                {
                  "x": 599.692,
                  "y": 301.992
                },
                {
                  "x": 600.411,
                  "y": 302.861
                },
                {
                  "x": 600.9839999999999,
                  "y": 303.68399999999997
                },
                {
                  "x": 601.363,
                  "y": 304.413
                },
                {
                  "x": 601.5,
                  "y": 305.0
                }
              ]
            },
            {
              "startLaneIndex": 0,
              "endLaneIndex": 1,
              "points": [
                {
                  "x": 595.0,
                  "y": 298.5
                },
                {
                  "x": 595.671,
                  "y": 298.637
                },
                {
                  "x": 596.628,
                  "y": 299.016
                },
                {
                  "x": 597.787,
                  "y": 299.589
                },
                {
                  "x": 599.064,
                  "y": 300.308
                },
                {
                  "x": 600.375,
                  "y": 301.125
                },
                {
                  "x": 601.636,
                  "y": 301.992
                },
                {
                  "x": 602.763,
                  "y": 302.861
                },
                {
                  "x": 603.6719999999999,
                  "y": 303.68399999999997
                },
                {
                  "x": 604.279,
                  "y": 304.413
                },
                {
                  "x": 604.5,
                  "y": 305.0
                }
              ]
            },
            {
              "startLaneIndex": 0,
              "endLaneIndex": 2,
              "points": [
                {
                  "x": 595.0,
                  "y": 298.5
                },
                {
                  "x": 595.755,
                  "y": 298.637
                },
                {
                  "x": 596.94,
                  "y": 299.016
                },
                {
                  "x": 598.435,
                  "y": 299.589
                },
                {
                  "x": 600.12,
                  "y": 300.308
                },
                {
                  "x": 601.875,
                  "y": 301.125
                },
                {
                  "x": 603.58,
                  "y": 301.992
                },
                {
                  "x": 605.115,
                  "y": 302.861
                },
                {
                  "x": 606.3599999999999,
                  "y": 303.68399999999997
                },
                {
                  "x": 607.1949999999999,
                  "y": 304.413
                },
                {
                  "x": 607.5,
                  "y": 305.0
                }
              ]
            }
          ]
        },
        {
          "type": "go_straight",
          "startRoad": "road_3_1_1",
          "endRoad": "road_3_2_1",
          "direction": 1,
          "laneLinks": [
            {
              "startLaneIndex": 1,
              "endLaneIndex": 0,
              "points": [
                {
                  "x": 604.5,
                  "y": 295.0
                },
                {
                  "x": 604.4159999999999,
                  "y": 295.64
                },
                {
                  "x": 604.188,
                  "y": 296.52
                },
                {
                  "x": 603.852,
                  "y": 297.58
                },
                {
                  "x": 603.444,
                  "y": 298.76
                },
                {
                  "x": 603.0,
                  "y": 300.0
                },
                {
                  "x": 602.556,
                  "y": 301.24
                },
                {
                  "x": 602.148,
                  "y": 302.42
                },
                {
                  "x": 601.8119999999999,
                  "y": 303.48
                },
                {
                  "x": 601.584,
                  "y": 304.36
                },
                {
                  "x": 601.5,
                  "y": 305.0
                }
              ]
            },
            {
              "startLaneIndex": 1,
              "endLaneIndex": 1,
              "points": [
                {
                  "x": 604.5,
                  "y": 295.0
                },
                {
                  "x": 604.5,
                  "y": 295.64
                },
                {
                  "x": 604.5,
                  "y": 296.52
                },
                {
                  "x": 604.5,
                  "y": 297.58
                },
                {
                  "x": 604.5,
                  "y": 298.76
                },
                {
                  "x": 604.5,
                  "y": 300.0
                },
                {
                  "x": 604.5,
                  "y": 301.24
                },
                {
                  "x": 604.5,
                  "y": 302.42
                },
                {
                  "x": 604.4999999999999,
                  "y": 303.48
                },
                {
                  "x": 604.5,
                  "y": 304.36
                },
                {
                  "x": 604.5,
                  "y": 305.0
                }
              ]
            },
            {
              "startLaneIndex": 1,
              "endLaneIndex": 2,
              "points": [
                {
                  "x": 604.5,
                  "y": 295.0
                },
                {
                  "x": 604.584,
                  "y": 295.64
                },
                {
                  "x": 604.812,
                  "y": 296.52
                },
                {
                  "x": 605.148,
                  "y": 297.58
                },
                {
                  "x": 605.556,
                  "y": 298.76
                },
                {
                  "x": 606.0,
                  "y": 300.0
                },
                {
                  "x": 606.444,
                  "y": 301.24
                },
                {
                  "x": 606.852,
                  "y": 302.42
                },
                {
                  "x": 607.1879999999999,
                  "y": 303.48
                },
                {
                  "x": 607.4159999999999,
                  "y": 304.36
                },
                {
                  "x": 607.5,
                  "y": 305.0
                }
              ]
            },
            {
              "startLaneIndex": 2,
              "endLaneIndex": 0,
              "points": [
                {
                  "x": 607.5,
                  "y": 295.0
                },
                {
                  "x": 607.332,
                  "y": 295.64
                },
                {
                  "x": 606.876,
                  "y": 296.52
                },
                {
                  "x": 606.204,
                  "y": 297.58
                },
                {
                  "x": 605.388,
                  "y": 298.76
                },
                {
                  "x": 604.5,
                  "y": 300.0
                },
                {
                  "x": 603.612,
                  "y": 301.24
                },
                {
                  "x": 602.796,
                  "y": 302.42
                },
                {
                  "x": 602.1239999999999,
                  "y": 303.48
                },
                {
                  "x": 601.668,
                  "y": 304.36
                },
                {
                  "x": 601.5,
                  "y": 305.0
                }
              ]
            },
            {
              "startLaneIndex": 2,
              "endLaneIndex": 1,
              "points": [
                {
                  "x": 607.5,
                  "y": 295.0
                },
                {
                  "x": 607.4159999999999,
                  "y": 295.64
                },
                {
                  "x": 607.188,
                  "y": 296.52
                },
                {
                  "x": 606.852,
                  "y": 297.58
                },
                {
                  "x": 606.444,
                  "y": 298.76
                },
                {
                  "x": 606.0,
                  "y": 300.0
                },
                {
                  "x": 605.556,
                  "y": 301.24
                },
                {
                  "x": 605.148,
                  "y": 302.42
                },
                {
                  "x": 604.8119999999999,
                  "y": 303.48
                },
                {
                  "x": 604.584,
                  "y": 304.36
                },
                {
                  "x": 604.5,
                  "y": 305.0
                }
              ]
            },
            {
              "startLaneIndex": 2,
              "endLaneIndex": 2,
              "points": [
                {
                  "x": 607.5,
                  "y": 295.0
                },
                {
                  "x": 607.5,
                  "y": 295.64
                },
                {
                  "x": 607.5,
                  "y": 296.52
                },
                {
                  "x": 607.5,
                  "y": 297.58
                },
                {
                  "x": 607.5,
                  "y": 298.76
                },
                {
                  "x": 607.5,
                  "y": 300.0
                },
                {
                  "x": 607.5,
                  "y": 301.24
                },
                {
                  "x": 607.5,
                  "y": 302.42
                },
                {
                  "x": 607.4999999999999,
                  "y": 303.48
                },
                {
                  "x": 607.5,
                  "y": 304.36
                },
                {
                  "x": 607.5,
                  "y": 305.0
                }
              ]
            }
          ]
        },
        {
          "type": "turn_left",
          "startRoad": "road_3_1_1",
          "endRoad": "road_3_2_2",
          "direction": 1,
          "laneLinks": [
            {
              "startLaneIndex": 0,
              "endLaneIndex": 0,
              "points": [
                {
                  "x": 601.5,
                  "y": 295.0
                },
                {
                  "x": 601.363,
                  "y": 295.587
                },
                {
                  "x": 600.984,
                  "y": 296.316
                },
                {
                  "x": 600.411,
                  "y": 297.139
                },
                {
                  "x": 599.692,
                  "y": 298.008
                },
                {
                  "x": 598.875,
                  "y": 298.875
                },
                {
                  "x": 598.008,
                  "y": 299.692
                },
                {
                  "x": 597.139,
                  "y": 300.411
                },
                {
                  "x": 596.3159999999999,
                  "y": 300.984
                },
                {
                  "x": 595.587,
                  "y": 301.363
                },
                {
                  "x": 595.0,
                  "y": 301.5
                }
              ]
            },
            {
              "startLaneIndex": 0,
              "endLaneIndex": 1,
              "points": [
                {
                  "x": 601.5,
                  "y": 295.0
                },
                {
                  "x": 601.363,
                  "y": 295.671
                },
                {
                  "x": 600.984,
                  "y": 296.628
                },
                {
                  "x": 600.411,
                  "y": 297.787
                },
                {
                  "x": 599.692,
                  "y": 299.064
                },
                {
                  "x": 598.875,
                  "y": 300.375
                },
                {
                  "x": 598.008,
                  "y": 301.636
                },
                {
                  "x": 597.139,
                  "y": 302.763
                },
                {
                  "x": 596.3159999999999,
                  "y": 303.672
                },
                {
                  "x": 595.587,
                  "y": 304.279
                },
                {
                  "x": 595.0,
                  "y": 304.5
                }
              ]
            },
            {
              "startLaneIndex": 0,
              "endLaneIndex": 2,
              "points": [
                {
                  "x": 601.5,
                  "y": 295.0
                },
                {
                  "x": 601.363,
                  "y": 295.755
                },
                {
                  "x": 600.984,
                  "y": 296.94
                },
                {
                  "x": 600.411,
                  "y": 298.435
                },
                {
                  "x": 599.692,
                  "y": 300.12
                },
                {
                  "x": 598.875,
                  "y": 301.875
                },
                {
                  "x": 598.008,
                  "y": 303.58
                },
                {
                  "x": 597.139,
                  "y": 305.115
                },
                {
                  "x": 596.3159999999999,
                  "y": 306.36
                },
                {
                  "x": 595.587,
                  "y": 307.195
                },
                {
                  "x": 595.0,
                  "y": 307.5
                }
              ]
            }
          ]
        },
        {
          "type": "go_straight",
          "startRoad": "road_4_2_2",
          "endRoad": "road_3_2_2",
          "direction": 2,
          "laneLinks": [
            {
              "startLaneIndex": 1,
              "endLaneIndex": 0,
              "points": [
                {
                  "x": 605.0,
                  "y": 304.5
                },
                {
                  "x": 604.36,
                  "y": 304.416
                },
                {
                  "x": 603.48,
                  "y": 304.188
                },
                {
                  "x": 602.42,
                  "y": 303.852
                },
                {
                  "x": 601.24,
                  "y": 303.444
                },
                {
                  "x": 600.0,
                  "y": 303.0
                },
                {
                  "x": 598.76,
                  "y": 302.556
                },
                {
                  "x": 597.58,
                  "y": 302.148
                },
                {
                  "x": 596.5199999999999,
                  "y": 301.812
                },
                {
                  "x": 595.64,
                  "y": 301.584
                },
                {
                  "x": 595.0,
                  "y": 301.5
                }
              ]
            },
            {
              "startLaneIndex": 1,
              "endLaneIndex": 1,
              "points": [
                {
                  "x": 605.0,
                  "y": 304.5
                },
                {
                  "x": 604.36,
                  "y": 304.5
                },
                {
                  "x": 603.48,
                  "y": 304.5
                },
                {
                  "x": 602.42,
                  "y": 304.5
                },
                {
                  "x": 601.24,
                  "y": 304.5
                },
                {
                  "x": 600.0,
                  "y": 304.5
                },
                {
                  "x": 598.76,
                  "y": 304.5
                },
                {
                  "x": 597.58,
                  "y": 304.5
                },
                {
                  "x": 596.5199999999999,
                  "y": 304.5
                },
                {
                  "x": 595.64,
                  "y": 304.5
                },
                {
                  "x": 595.0,
                  "y": 304.5
                }
              ]
            },
            {
              "startLaneIndex": 1,
              "endLaneIndex": 2,
              "points": [
                {
                  "x": 605.0,
                  "y": 304.5
                },
                {
                  "x": 604.36,
                  "y": 304.584
                },
                {
                  "x": 603.48,
                  "y": 304.812
                },
                {
                  "x": 602.42,
                  "y": 305.148
                },
                {
                  "x": 601.24,
                  "y": 305.556
                },
                {
                  "x": 600.0,
                  "y": 306.0
                },
                {
                  "x": 598.76,
                  "y": 306.444
                },
                {
                  "x": 597.58,
                  "y": 306.852
                },
                {
                  "x": 596.5199999999999,
                  "y": 307.188
                },
                {
                  "x": 595.64,
                  "y": 307.416
                },
                {
                  "x": 595.0,
                  "y": 307.5
                }
              ]
            },
            {
              "startLaneIndex": 2,
              "endLaneIndex": 0,
              "points": [
                {
                  "x": 605.0,
                  "y": 307.5
                },
                {
                  "x": 604.36,
                  "y": 307.332
                },
                {
                  "x": 603.48,
                  "y": 306.876
                },
                {
                  "x": 602.42,
                  "y": 306.204
                },
                {
                  "x": 601.24,
                  "y": 305.388
                },
                {
                  "x": 600.0,
                  "y": 304.5
                },
                {
                  "x": 598.76,
                  "y": 303.612
                },
                {
                  "x": 597.58,
                  "y": 302.796
                },
                {
                  "x": 596.5199999999999,
                  "y": 302.124
                },
                {
                  "x": 595.64,
                  "y": 301.668
                },
                {
                  "x": 595.0,
                  "y": 301.5
                }
              ]
            },
            {
              "startLaneIndex": 2,
              "endLaneIndex": 1,
              "points": [
                {
                  "x": 605.0,
                  "y": 307.5
                },
                {
                  "x": 604.36,
                  "y": 307.416
                },
                {
                  "x": 603.48,
                  "y": 307.188
                },
                {
                  "x": 602.42,
                  "y": 306.852
                },
                {
                  "x": 601.24,
                  "y": 306.444
                },
                {
                  "x": 600.0,
                  "y": 306.0
                },
                {
                  "x": 598.76,
                  "y": 305.556
                },
                {
                  "x": 597.58,
                  "y": 305.148
                },
                {
                  "x": 596.5199999999999,
                  "y": 304.812
                },
                {
                  "x": 595.64,
                  "y": 304.584
                },
                {
                  "x": 595.0,
                  "y": 304.5
                }
              ]
            },
            {
              "startLaneIndex": 2,
              "endLaneIndex": 2,
              "points": [
                {
                  "x": 605.0,
                  "y": 307.5
                },
                {
                  "x": 604.36,
                  "y": 307.5
                },
                {
                  "x": 603.48,
                  "y": 307.5
                },
                {
                  "x": 602.42,
                  "y": 307.5
                },
                {
                  "x": 601.24,
                  "y": 307.5
                },
                {
                  "x": 600.0,
                  "y": 307.5
                },
                {
                  "x": 598.76,
                  "y": 307.5
                },
                {
                  "x": 597.58,
                  "y": 307.5
                },
                {
                  "x": 596.5199999999999,
                  "y": 307.5
                },
                {
                  "x": 595.64,
                  "y": 307.5
                },
                {
                  "x": 595.0,
                  "y": 307.5
                }
              ]
            }
          ]
        },
        {
          "type": "turn_left",
          "startRoad": "road_4_2_2",
          "endRoad": "road_3_2_3",
          "direction": 2,
          "laneLinks": [
            {
              "startLaneIndex": 0,
              "endLaneIndex": 0,
              "points": [
                {
                  "x": 605.0,
                  "y": 301.5
                },
                {
                  "x": 604.413,
                  "y": 301.363
                },
                {
                  "x": 603.684,
                  "y": 300.984
                },
                {
                  "x": 602.861,
                  "y": 300.411
                },
                {
                  "x": 601.992,
                  "y": 299.692
                },
                {
                  "x": 601.125,
                  "y": 298.875
                },
                {
                  "x": 600.308,
                  "y": 298.008
                },
                {
                  "x": 599.5889999999999,
                  "y": 297.139
                },
                {
                  "x": 599.0159999999998,
                  "y": 296.316
                },
                {
                  "x": 598.637,
                  "y": 295.587
                },
                {
                  "x": 598.5,
                  "y": 295.0
                }
              ]
            },
            {
              "startLaneIndex": 0,
              "endLaneIndex": 1,
              "points": [
                {
                  "x": 605.0,
                  "y": 301.5
                },
                {
                  "x": 604.329,
                  "y": 301.363
                },
                {
                  "x": 603.372,
                  "y": 300.984
                },
                {
                  "x": 602.213,
                  "y": 300.411
                },
                {
                  "x": 600.936,
                  "y": 299.692
                },
                {
                  "x": 599.625,
                  "y": 298.875
                },
                {
                  "x": 598.364,
                  "y": 298.008
                },
                {
                  "x": 597.237,
                  "y": 297.139
                },
                {
                  "x": 596.3279999999999,
                  "y": 296.316
                },
                {
                  "x": 595.721,
                  "y": 295.587
                },
                {
                  "x": 595.5,
                  "y": 295.0
                }
              ]
            },
            {
              "startLaneIndex": 0,
              "endLaneIndex": 2,
              "points": [
                {
                  "x": 605.0,
                  "y": 301.5
                },
                {
                  "x": 604.245,
                  "y": 301.363
                },
                {
                  "x": 603.06,
                  "y": 300.984
                },
                {
                  "x": 601.565,
                  "y": 300.411
                },
                {
                  "x": 599.88,
                  "y": 299.692
                },
                {
                  "x": 598.125,
                  "y": 298.875
                },
                {
                  "x": 596.42,
                  "y": 298.008
                },
                {
                  "x": 594.885,
                  "y": 297.139
                },
                {
                  "x": 593.6399999999999,
                  "y": 296.316
                },
                {
                  "x": 592.805,
                  "y": 295.587
                },
                {
                  "x": 592.5,
                  "y": 295.0
                }
              ]
            }
          ]
        },
        {
          "type": "turn_left",
          "startRoad": "road_3_3_3",
          "endRoad": "road_3_2_0",
          "direction": 3,
          "laneLinks": [
            {
              "startLaneIndex": 0,
              "endLaneIndex": 0,
              "points": [
                {
                  "x": 598.5,
                  "y": 305.0
                },
                {
                  "x": 598.637,
                  "y": 304.413
                },
                {
                  "x": 599.016,
                  "y": 303.68399999999997
                },
                {
                  "x": 599.5889999999999,
                  "y": 302.861
                },
                {
                  "x": 600.308,
                  "y": 301.992
                },
                {
                  "x": 601.125,
                  "y": 301.125
                },
                {
                  "x": 601.992,
                  "y": 300.308
                },
                {
                  "x": 602.861,
                  "y": 299.589
                },
                {
                  "x": 603.6839999999999,
                  "y": 299.016
                },
                {
                  "x": 604.413,
                  "y": 298.637
                },
                {
                  "x": 605.0,
                  "y": 298.5
                }
              ]
            },
            {
              "startLaneIndex": 0,
              "endLaneIndex": 1,
              "points": [
                {
                  "x": 598.5,
                  "y": 305.0
                },
                {
                  "x": 598.637,
                  "y": 304.329
                },
                {
                  "x": 599.016,
                  "y": 303.372
                },
                {
                  "x": 599.5889999999999,
                  "y": 302.213
                },
                {
                  "x": 600.308,
                  "y": 300.936
                },
                {
                  "x": 601.125,
                  "y": 299.625
                },
                {
                  "x": 601.992,
                  "y": 298.364
                },
                {
                  "x": 602.861,
                  "y": 297.237
                },
                {
                  "x": 603.6839999999999,
                  "y": 296.328
                },
                {
                  "x": 604.413,
                  "y": 295.721
                },
                {
                  "x": 605.0,
                  "y": 295.5
                }
              ]
            },
            {
              "startLaneIndex": 0,
              "endLaneIndex": 2,
              "points": [
                {
                  "x": 598.5,
                  "y": 305.0
                },
                {
                  "x": 598.637,
                  "y": 304.245
                },
                {
                  "x": 599.016,
                  "y": 303.06
                },
                {
                  "x": 599.5889999999999,
                  "y": 301.565
                },
                {
                  "x": 600.308,
                  "y": 299.88
                },
                {
                  "x": 601.125,
                  "y": 298.125
                },
                {
                  "x": 601.992,
                  "y": 296.42
                },
                {
                  "x": 602.861,
                  "y": 294.885
                },
                {
                  "x": 603.6839999999999,
                  "y": 293.64
                },
                {
                  "x": 604.413,
                  "y": 292.805
                },
                {
                  "x": 605.0,
                  "y": 292.5
                }
              ]
            }
          ]
        },
        {
          "type": "go_straight",
          "startRoad": "road_3_3_3",
          "endRoad": "road_3_2_3",
          "direction": 3,
          "laneLinks": [
            {
              "startLaneIndex": 1,
              "endLaneIndex": 0,
              "points": [
                {
                  "x": 595.5,
                  "y": 305.0
                },
                {
                  "x": 595.584,
                  "y": 304.36
                },
                {
                  "x": 595.812,
                  "y": 303.48
                },
                {
                  "x": 596.148,
                  "y": 302.42
                },
                {
                  "x": 596.556,
                  "y": 301.24
                },
                {
                  "x": 597.0,
                  "y": 300.0
                },
                {
                  "x": 597.444,
                  "y": 298.76
                },
                {
                  "x": 597.852,
                  "y": 297.58
                },
                {
                  "x": 598.1879999999999,
                  "y": 296.52
                },
                {
                  "x": 598.4159999999999,
                  "y": 295.64
                },
                {
                  "x": 598.5,
                  "y": 295.0
                }
              ]
            },
            {
              "startLaneIndex": 1,
              "endLaneIndex": 1,
              "points": [
                {
                  "x": 595.5,
                  "y": 305.0
                },
                {
                  "x": 595.5,
                  "y": 304.36
                },
                {
                  "x": 595.5,
                  "y": 303.48
                },
                {
                  "x": 595.5,
                  "y": 302.42
                },
                {
                  "x": 595.5,
                  "y": 301.24
                },
                {
                  "x": 595.5,
                  "y": 300.0
                },
                {
                  "x": 595.5,
                  "y": 298.76
                },
                {
                  "x": 595.5,
                  "y": 297.58
                },
                {
                  "x": 595.4999999999999,
                  "y": 296.52
                },
                {
                  "x": 595.5,
                  "y": 295.64
                },
                {
                  "x": 595.5,
                  "y": 295.0
                }
              ]
            },
            {
              "startLaneIndex": 1,
              "endLaneIndex": 2,
              "points": [
                {
                  "x": 595.5,
                  "y": 305.0
                },
                {
                  "x": 595.4159999999999,
                  "y": 304.36
                },
                {
                  "x": 595.188,
                  "y": 303.48
                },
                {
                  "x": 594.852,
                  "y": 302.42
                },
                {
                  "x": 594.444,
                  "y": 301.24
                },
                {
                  "x": 594.0,
                  "y": 300.0
                },
                {
                  "x": 593.556,
                  "y": 298.76
                },
                {
                  "x": 593.148,
                  "y": 297.58
                },
                {
                  "x": 592.8119999999999,
                  "y": 296.52
                },
                {
                  "x": 592.584,
                  "y": 295.64
                },
                {
                  "x": 592.5,
                  "y": 295.0
                }
              ]
            },
            {
              "startLaneIndex": 2,
              "endLaneIndex": 0,
              "points": [
                {
                  "x": 592.5,
                  "y": 305.0
                },
                {
                  "x": 592.668,
                  "y": 304.36
                },
                {
                  "x": 593.124,
                  "y": 303.48
                },
                {
                  "x": 593.796,
                  "y": 302.42
                },
                {
                  "x": 594.612,
                  "y": 301.24
                },
                {
                  "x": 595.5,
                  "y": 300.0
                },
                {
                  "x": 596.388,
                  "y": 298.76
                },
                {
                  "x": 597.204,
                  "y": 297.58
                },
                {
                  "x": 597.8759999999999,
                  "y": 296.52
                },
                {
                  "x": 598.332,
                  "y": 295.64
                },
                {
                  "x": 598.5,
                  "y": 295.0
                }
              ]
            },
            {
              "startLaneIndex": 2,
              "endLaneIndex": 1,
              "points": [
                {
                  "x": 592.5,
                  "y": 305.0
                },
                {
                  "x": 592.584,
                  "y": 304.36
                },
                {
                  "x": 592.812,
                  "y": 303.48
                },
                {
                  "x": 593.148,
                  "y": 302.42
                },
                {
                  "x": 593.556,
                  "y": 301.24
                },
                {
                  "x": 594.0,
                  "y": 300.0
                },
                {
                  "x": 594.444,
                  "y": 298.76
                },
                {
                  "x": 594.852,
                  "y": 297.58
                },
                {
                  "x": 595.1879999999999,
                  "y": 296.52
                },
                {
                  "x": 595.4159999999999,
                  "y": 295.64
                },
                {
                  "x": 595.5,
                  "y": 295.0
                }
              ]
            },
            {
              "startLaneIndex": 2,
              "endLaneIndex": 2,
              "points": [
                {
                  "x": 592.5,
                  "y": 305.0
                },
                {
                  "x": 592.5,
                  "y": 304.36
                },
                {
                  "x": 592.5,
                  "y": 303.48
                },
                {
                  "x": 592.5,
                  "y": 302.42
                },
                {
                  "x": 592.5,
                  "y": 301.24
                },
                {
                  "x": 592.5,
                  "y": 300.0
                },
                {
                  "x": 592.5,
                  "y": 298.76
                },
                {
                  "x": 592.5,
                  "y": 297.58
                },
                {
                  "x": 592.4999999999999,
                  "y": 296.52
                },
                {
                  "x": 592.5,
                  "y": 295.64
                },
                {
                  "x": 592.5,
                  "y": 295.0
                }
              ]
            }
          ]
        }
      ],
      "trafficLight": {
        "roadLinkIndices": [
          0,
          1,
          2,
          3,
          4,
          5,
          6,
          7
        ],
        "lightphases": [
          {
            "time": 5,
            "availableRoadLinks": []
          },
          {
            "time": 30,
            "availableRoadLinks": [
              0,
              4
            ]
          },
          {
            "time": 30,
            "availableRoadLinks": [
              2,
              7
            ]
          },
          {
            "time": 30,
            "availableRoadLinks": [
              1,
              5
            ]
          },
          {
            "time": 30,
            "availableRoadLinks": [
              3,
              6
            ]
          },
          {
            "time": 30,
            "availableRoadLinks": [
              0,
              1
            ]
          },
          {
            "time": 30,
            "availableRoadLinks": [
              4,
              5
            ]
          },
          {
            "time": 30,
            "availableRoadLinks": [
              2,
              3
            ]
          },
          {
            "time": 30,
            "availableRoadLinks": [
              6,
              7
            ]
          }
        ]
      },
      "virtual": false
    },
    {
      "id": "intersection_3_3",
      "point": {
        "x": 600,
        "y": 600
      },
      "width": 5,
      "roads": [
        "road_2_3_0",
        "road_3_2_1",
        "road_4_3_2",
        "road_3_4_3",
        "road_3_3_0",
        "road_3_3_1",
        "road_3_3_2",
        "road_3_3_3"
      ],
      "roadLinks": [
        {
          "type": "go_straight",
          "startRoad": "road_2_3_0",
          "endRoad": "road_3_3_0",
          "direction": 0,
          "laneLinks": [
            {
              "startLaneIndex": 1,
              "endLaneIndex": 0,
              "points": [
                {
                  "x": 595.0,
                  "y": 595.5
                },
                {
                  "x": 595.64,
                  "y": 595.584
                },
                {
                  "x": 596.52,
                  "y": 595.812
                },
                {
                  "x": 597.58,
                  "y": 596.148
                },
                {
                  "x": 598.76,
                  "y": 596.556
                },
                {
                  "x": 600.0,
                  "y": 597.0
                },
                {
                  "x": 601.24,
                  "y": 597.444
                },
                {
                  "x": 602.42,
                  "y": 597.852
                },
                {
                  "x": 603.4799999999999,
                  "y": 598.1879999999999
                },
                {
                  "x": 604.36,
                  "y": 598.4159999999999
                },
                {
                  "x": 605.0,
                  "y": 598.5
                }
              ]
            },
            {
              "startLaneIndex": 1,
              "endLaneIndex": 1,
              "points": [
                {
                  "x": 595.0,
                  "y": 595.5
                },
                {
                  "x": 595.64,
                  "y": 595.5
                },
                {
                  "x": 596.52,
                  "y": 595.5
                },
                {
                  "x": 597.58,
                  "y": 595.5
                },
                {
                  "x": 598.76,
                  "y": 595.5
                },
                {
                  "x": 600.0,
                  "y": 595.5
                },
                {
                  "x": 601.24,
                  "y": 595.5
                },
                {
                  "x": 602.42,
                  "y": 595.5
                },
                {
                  "x": 603.4799999999999,
                  "y": 595.4999999999999
                },
                {
                  "x": 604.36,
                  "y": 595.5
                },
                {
                  "x": 605.0,
                  "y": 595.5
                }
              ]
            },
            {
              "startLaneIndex": 1,
              "endLaneIndex": 2,
              "points": [
                {
                  "x": 595.0,
                  "y": 595.5
                },
                {
                  "x": 595.64,
                  "y": 595.4159999999999
                },
                {
                  "x": 596.52,
                  "y": 595.188
                },
                {
                  "x": 597.58,
                  "y": 594.852
                },
                {
                  "x": 598.76,
                  "y": 594.444
                },
                {
                  "x": 600.0,
                  "y": 594.0
                },
                {
                  "x": 601.24,
                  "y": 593.556
                },
                {
                  "x": 602.42,
                  "y": 593.148
                },
                {
                  "x": 603.4799999999999,
                  "y": 592.8119999999999
                },
                {
                  "x": 604.36,
                  "y": 592.584
                },
                {
                  "x": 605.0,
                  "y": 592.5
                }
              ]
            },
            {
              "startLaneIndex": 2,
              "endLaneIndex": 0,
              "points": [
                {
                  "x": 595.0,
                  "y": 592.5
                },
                {
                  "x": 595.64,
                  "y": 592.668
                },
                {
                  "x": 596.52,
                  "y": 593.124
                },
                {
                  "x": 597.58,
                  "y": 593.796
                },
                {
                  "x": 598.76,
                  "y": 594.612
                },
                {
                  "x": 600.0,
                  "y": 595.5
                },
                {
                  "x": 601.24,
                  "y": 596.388
                },
                {
                  "x": 602.42,
                  "y": 597.204
                },
                {
                  "x": 603.4799999999999,
                  "y": 597.8759999999999
                },
                {
                  "x": 604.36,
                  "y": 598.332
                },
                {
                  "x": 605.0,
                  "y": 598.5
                }
              ]
            },
            {
              "startLaneIndex": 2,
              "endLaneIndex": 1,
              "points": [
                {
                  "x": 595.0,
                  "y": 592.5
                },
                {
                  "x": 595.64,
                  "y": 592.584
                },
                {
                  "x": 596.52,
                  "y": 592.812
                },
                {
                  "x": 597.58,
                  "y": 593.148
                },
                {
                  "x": 598.76,
                  "y": 593.556
                },
                {
                  "x": 600.0,
                  "y": 594.0
                },
                {
                  "x": 601.24,
                  "y": 594.444
                },
                {
                  "x": 602.42,
                  "y": 594.852
                },
                {
                  "x": 603.4799999999999,
                  "y": 595.1879999999999
                },
                {
                  "x": 604.36,
                  "y": 595.4159999999999
                },
                {
                  "x": 605.0,
                  "y": 595.5
                }
              ]
            },
            {
              "startLaneIndex": 2,
              "endLaneIndex": 2,
              "points": [
                {
                  "x": 595.0,
                  "y": 592.5
                },
                {
                  "x": 595.64,
                  "y": 592.5
                },
                {
                  "x": 596.52,
                  "y": 592.5
                },
                {
                  "x": 597.58,
                  "y": 592.5
                },
                {
                  "x": 598.76,
                  "y": 592.5
                },
                {
                  "x": 600.0,
                  "y": 592.5
                },
                {
                  "x": 601.24,
                  "y": 592.5
                },
                {
                  "x": 602.42,
                  "y": 592.5
                },
                {
                  "x": 603.4799999999999,
                  "y": 592.4999999999999
                },
                {
                  "x": 604.36,
                  "y": 592.5
                },
                {
                  "x": 605.0,
                  "y": 592.5
                }
              ]
            }
          ]
        },
        {
          "type": "turn_left",
          "startRoad": "road_2_3_0",
          "endRoad": "road_3_3_1",
          "direction": 0,
          "laneLinks": [
            {
              "startLaneIndex": 0,
              "endLaneIndex": 0,
              "points": [
                {
                  "x": 595.0,
                  "y": 598.5
                },
                {
                  "x": 595.587,
                  "y": 598.637
                },
                {
                  "x": 596.316,
                  "y": 599.016
                },
                {
                  "x": 597.139,
                  "y": 599.5889999999999
                },
                {
                  "x": 598.008,
                  "y": 600.308
                },
                {
                  "x": 598.875,
                  "y": 601.125
                },
                {
                  "x": 599.692,
                  "y": 601.992
                },
                {
                  "x": 600.411,
                  "y": 602.861
                },
                {
                  "x": 600.9839999999999,
                  "y": 603.6839999999999
                },
                {
                  "x": 601.363,
                  "y": 604.413
                },
                {
                  "x": 601.5,
                  "y": 605.0
                }
              ]
            },
            {
              "startLaneIndex": 0,
              "endLaneIndex": 1,
              "points": [
                {
                  "x": 595.0,
                  "y": 598.5
                },
                {
                  "x": 595.671,
                  "y": 598.637
                },
                {
                  "x": 596.628,
                  "y": 599.016
                },
                {
                  "x": 597.787,
                  "y": 599.5889999999999
                },
                {
                  "x": 599.064,
                  "y": 600.308
                },
                {
                  "x": 600.375,
                  "y": 601.125
                },
                {
                  "x": 601.636,
                  "y": 601.992
                },
                {
                  "x": 602.763,
                  "y": 602.861
                },
                {
                  "x": 603.6719999999999,
                  "y": 603.6839999999999
                },
                {
                  "x": 604.279,
                  "y": 604.413
                },
                {
                  "x": 604.5,
                  "y": 605.0
                }
              ]
            },
            {
              "startLaneIndex": 0,
              "endLaneIndex": 2,
              "points": [
                {
                  "x": 595.0,
                  "y": 598.5
                },
                {
                  "x": 595.755,
                  "y": 598.637
                },
                {
                  "x": 596.94,
                  "y": 599.016
                },
                {
                  "x": 598.435,
                  "y": 599.5889999999999
                },
                {
                  "x": 600.12,
                  "y": 600.308
                },
                {
                  "x": 601.875,
                  "y": 601.125
                },
                {
                  "x": 603.58,
                  "y": 601.992
                },
                {
                  "x": 605.115,
                  "y": 602.861
                },
                {
                  "x": 606.3599999999999,
                  "y": 603.6839999999999
                },
                {
                  "x": 607.1949999999999,
                  "y": 604.413
                },
                {
                  "x": 607.5,
                  "y": 605.0
                }
              ]
            }
          ]
        },
        {
          "type": "go_straight",
          "startRoad": "road_3_2_1",
          "endRoad": "road_3_3_1",
          "direction": 1,
          "laneLinks": [
            {
              "startLaneIndex": 1,
              "endLaneIndex": 0,
              "points": [
                {
                  "x": 604.5,
                  "y": 595.0
                },
                {
                  "x": 604.4159999999999,
                  "y": 595.64
                },
                {
                  "x": 604.188,
                  "y": 596.52
                },
                {
                  "x": 603.852,
                  "y": 597.58
                },
                {
                  "x": 603.444,
                  "y": 598.76
                },
                {
                  "x": 603.0,
                  "y": 600.0
                },
                {
                  "x": 602.556,
                  "y": 601.24
                },
                {
                  "x": 602.148,
                  "y": 602.42
                },
                {
                  "x": 601.8119999999999,
                  "y": 603.4799999999999
                },
                {
                  "x": 601.584,
                  "y": 604.36
                },
                {
                  "x": 601.5,
                  "y": 605.0
                }
              ]
            },
            {
              "startLaneIndex": 1,
              "endLaneIndex": 1,
              "points": [
                {
                  "x": 604.5,
                  "y": 595.0
                },
                {
                  "x": 604.5,
                  "y": 595.64
                },
                {
                  "x": 604.5,
                  "y": 596.52
                },
                {
                  "x": 604.5,
                  "y": 597.58
                },
                {
                  "x": 604.5,
                  "y": 598.76
                },
                {
                  "x": 604.5,
                  "y": 600.0
                },
                {
                  "x": 604.5,
                  "y": 601.24
                },
                {
                  "x": 604.5,
                  "y": 602.42
                },
                {
                  "x": 604.4999999999999,
                  "y": 603.4799999999999
                },
                {
                  "x": 604.5,
                  "y": 604.36
                },
                {
                  "x": 604.5,
                  "y": 605.0
                }
              ]
            },
            {
              "startLaneIndex": 1,
              "endLaneIndex": 2,
[truncated: 62,426 more chars]
