# Supplementary material
Source: ML conference proceedings conference paper supplement (https://proceedings.neurips.cc/paper_files/paper/2021/hash/654516d1b4df6917094de807156adc14-Abstract.html)
Supplement: Supplementary file 1 [file 654516d1b4df6917094de807156adc14-Supplemental.zip › neurips-supplementary/codes/data/template_ls/6/cross.sumocfg]

<configuration xmlns:xsi="http://www.w3.org/2001/XMLSchema-instance" xsi:noNamespaceSchemaLocation="http://sumo.dlr.de/xsd/sumoConfiguration.xsd">

    <input>
        <net-file value="cross.net.xml" />
        <additional-files value="cross.tll.xml"/>

    <route-files value="cross.20160801.0-86400.3701044216_33214.real.xml" /></input>

    <processing>
        <time-to-teleport value="-1" />
        <ignore-junction-blocker value="1" />
    </processing>
    <report>
        <verbose value="true" />
        <no-step-log value="true" />
    </report>

</configuration>
