# Supplementary material
Source: ML conference proceedings conference paper supplement (https://proceedings.neurips.cc/paper_files/paper/2021/hash/654516d1b4df6917094de807156adc14-Abstract.html)
Supplement: Supplementary file 1 [file 654516d1b4df6917094de807156adc14-Supplemental.zip › neurips-supplementary/codes/data/template_ls/6/cross.typ.xml]

<?xml version="1.0" encoding="UTF-8"?>
<types>
   <type id="go_in_to_junction" priority="78" numLanes="1" speed="11.111"/>
   <type id="come_out_of_junction" priority="46" numLanes="1" speed="11.111"/>
   <type id="come_out_of_rd" priority="40" numLanes="1" speed="11.111"/>
   <type id="come_out_of_rd" priority="40" numLanes="1" speed="11.111"/>
</types>
