# Supplementary material
Source: ML conference proceedings conference paper supplement (https://proceedings.neurips.cc/paper_files/paper/2021/hash/654516d1b4df6917094de807156adc14-Abstract.html)
Supplement: Supplementary file 1 [file 654516d1b4df6917094de807156adc14-Supplemental.zip › neurips-supplementary/codes/data/template_lsr/3_3/anon_3_3_300_0.3_bi.json]

[
  {
    "vehicle": {
      "length": 5.0,
      "width": 2.0,
      "maxPosAcc": 2.0,
      "maxNegAcc": 4.5,
      "usualPosAcc": 2.0,
      "usualNegAcc": 4.5,
      "minGap": 2.5,
      "maxSpeed": 11.111,
      "headwayTime": 2
    },
    "route": [
      "road_0_1_0",
      "road_1_1_0",
      "road_2_1_0",
      "road_3_1_0"
    ],
    "interval": 12.0,
    "startTime": 0,
    "endTime": 14400
  },
  {
    "vehicle": {
      "length": 5.0,
      "width": 2.0,
      "maxPosAcc": 2.0,
      "maxNegAcc": 4.5,
      "usualPosAcc": 2.0,
      "usualNegAcc": 4.5,
      "minGap": 2.5,
      "maxSpeed": 11.111,
      "headwayTime": 2
    },
    "route": [
      "road_4_1_2",
      "road_3_1_2",
      "road_2_1_2",
      "road_1_1_2"
    ],
    "interval": 12.0,
    "startTime": 0,
    "endTime": 14400
  },
  {
    "vehicle": {
      "length": 5.0,
      "width": 2.0,
      "maxPosAcc": 2.0,
      "maxNegAcc": 4.5,
      "usualPosAcc": 2.0,
      "usualNegAcc": 4.5,
      "minGap": 2.5,
      "maxSpeed": 11.111,
      "headwayTime": 2
    },
    "route": [
      "road_0_2_0",
      "road_1_2_0",
      "road_2_2_0",
      "road_3_2_0"
    ],
    "interval": 12.0,
    "startTime": 0,
    "endTime": 14400
  },
  {
    "vehicle": {
      "length": 5.0,
      "width": 2.0,
      "maxPosAcc": 2.0,
      "maxNegAcc": 4.5,
      "usualPosAcc": 2.0,
      "usualNegAcc": 4.5,
      "minGap": 2.5,
      "maxSpeed": 11.111,
      "headwayTime": 2
    },
    "route": [
      "road_4_2_2",
      "road_3_2_2",
      "road_2_2_2",
      "road_1_2_2"
    ],
    "interval": 12.0,
    "startTime": 0,
    "endTime": 14400
  },
  {
    "vehicle": {
      "length": 5.0,
      "width": 2.0,
      "maxPosAcc": 2.0,
      "maxNegAcc": 4.5,
      "usualPosAcc": 2.0,
      "usualNegAcc": 4.5,
      "minGap": 2.5,
      "maxSpeed": 11.111,
      "headwayTime": 2
    },
    "route": [
      "road_0_3_0",
      "road_1_3_0",
      "road_2_3_0",
      "road_3_3_0"
    ],
    "interval": 12.0,
    "startTime": 0,
    "endTime": 14400
  },
  {
    "vehicle": {
      "length": 5.0,
      "width": 2.0,
      "maxPosAcc": 2.0,
      "maxNegAcc": 4.5,
      "usualPosAcc": 2.0,
      "usualNegAcc": 4.5,
      "minGap": 2.5,
      "maxSpeed": 11.111,
      "headwayTime": 2
    },
    "route": [
      "road_4_3_2",
      "road_3_3_2",
      "road_2_3_2",
      "road_1_3_2"
    ],
    "interval": 12.0,
    "startTime": 0,
    "endTime": 14400
  },
  {
    "vehicle": {
      "length": 5.0,
      "width": 2.0,
      "maxPosAcc": 2.0,
      "maxNegAcc": 4.5,
      "usualPosAcc": 2.0,
      "usualNegAcc": 4.5,
      "minGap": 2.5,
      "maxSpeed": 11.111,
      "headwayTime": 2
    },
    "route": [
      "road_1_0_1",
      "road_1_1_1",
      "road_1_2_1",
      "road_1_3_1"
    ],
    "interval": 40.0,
    "startTime": 0,
    "endTime": 14400
  },
  {
    "vehicle": {
      "length": 5.0,
      "width": 2.0,
      "maxPosAcc": 2.0,
      "maxNegAcc": 4.5,
      "usualPosAcc": 2.0,
      "usualNegAcc": 4.5,
      "minGap": 2.5,
      "maxSpeed": 11.111,
      "headwayTime": 2
    },
    "route": [
      "road_1_4_3",
      "road_1_3_3",
      "road_1_2_3",
      "road_1_1_3"
    ],
    "interval": 40.0,
    "startTime": 0,
    "endTime": 14400
  },
  {
    "vehicle": {
      "length": 5.0,
      "width": 2.0,
      "maxPosAcc": 2.0,
      "maxNegAcc": 4.5,
      "usualPosAcc": 2.0,
      "usualNegAcc": 4.5,
      "minGap": 2.5,
      "maxSpeed": 11.111,
      "headwayTime": 2
    },
    "route": [
      "road_2_0_1",
      "road_2_1_1",
      "road_2_2_1",
      "road_2_3_1"
    ],
    "interval": 40.0,
    "startTime": 0,
    "endTime": 14400
  },
  {
    "vehicle": {
      "length": 5.0,
      "width": 2.0,
      "maxPosAcc": 2.0,
      "maxNegAcc": 4.5,
      "usualPosAcc": 2.0,
      "usualNegAcc": 4.5,
      "minGap": 2.5,
      "maxSpeed": 11.111,
      "headwayTime": 2
    },
    "route": [
      "road_2_4_3",
      "road_2_3_3",
      "road_2_2_3",
      "road_2_1_3"
    ],
    "interval": 40.0,
    "startTime": 0,
    "endTime": 14400
  },
  {
    "vehicle": {
      "length": 5.0,
      "width": 2.0,
      "maxPosAcc": 2.0,
      "maxNegAcc": 4.5,
      "usualPosAcc": 2.0,
      "usualNegAcc": 4.5,
      "minGap": 2.5,
      "maxSpeed": 11.111,
      "headwayTime": 2
    },
    "route": [
      "road_3_0_1",
      "road_3_1_1",
      "road_3_2_1",
      "road_3_3_1"
    ],
    "interval": 40.0,
    "startTime": 0,
    "endTime": 14400
  },
  {
    "vehicle": {
      "length": 5.0,
      "width": 2.0,
      "maxPosAcc": 2.0,
      "maxNegAcc": 4.5,
      "usualPosAcc": 2.0,
      "usualNegAcc": 4.5,
      "minGap": 2.5,
      "maxSpeed": 11.111,
      "headwayTime": 2
    },
    "route": [
      "road_3_4_3",
      "road_3_3_3",
      "road_3_2_3",
      "road_3_1_3"
    ],
    "interval": 40.0,
    "startTime": 0,
    "endTime": 14400
  }
]
