# Supplementary material
Source: ML conference proceedings conference paper supplement (https://proceedings.neurips.cc/paper_files/paper/2021/hash/654516d1b4df6917094de807156adc14-Abstract.html)
Supplement: Supplementary file 1 [file 654516d1b4df6917094de807156adc14-Supplemental.zip › neurips-supplementary/codes/data/template_lsr/3_3/roadnet_3_3.json]

{
  "intersections": [
    {
      "id": "intersection_0_1",
      "point": {
        "x": -300,
        "y": 0
      },
      "width": 0,
      "roads": [
        "road_1_1_2",
        "road_0_1_0"
      ],
      "roadLinks": [],
      "trafficLight": {
        "roadLinkIndices": [],
        "lightphases": [
          {
            "time": 5,
            "availableRoadLinks": []
          },
          {
            "time": 30,
            "availableRoadLinks": []
          },
          {
            "time": 30,
            "availableRoadLinks": []
          },
          {
            "time": 30,
            "availableRoadLinks": []
          },
          {
            "time": 30,
            "availableRoadLinks": []
          },
          {
            "time": 30,
            "availableRoadLinks": []
          },
          {
            "time": 30,
            "availableRoadLinks": []
          },
          {
            "time": 30,
            "availableRoadLinks": []
          },
          {
            "time": 30,
            "availableRoadLinks": []
          }
        ]
      },
      "virtual": true
    },
    {
      "id": "intersection_0_2",
      "point": {
        "x": -300,
        "y": 300
      },
      "width": 0,
      "roads": [
        "road_1_2_2",
        "road_0_2_0"
      ],
      "roadLinks": [],
      "trafficLight": {
        "roadLinkIndices": [],
        "lightphases": [
          {
            "time": 5,
            "availableRoadLinks": []
          },
          {
            "time": 30,
            "availableRoadLinks": []
          },
          {
            "time": 30,
            "availableRoadLinks": []
          },
          {
            "time": 30,
            "availableRoadLinks": []
          },
          {
            "time": 30,
            "availableRoadLinks": []
          },
          {
            "time": 30,
            "availableRoadLinks": []
          },
          {
            "time": 30,
            "availableRoadLinks": []
          },
          {
            "time": 30,
            "availableRoadLinks": []
          },
          {
            "time": 30,
            "availableRoadLinks": []
          }
        ]
      },
      "virtual": true
    },
    {
      "id": "intersection_0_3",
      "point": {
        "x": -300,
        "y": 600
      },
      "width": 0,
      "roads": [
        "road_1_3_2",
        "road_0_3_0"
      ],
      "roadLinks": [],
      "trafficLight": {
        "roadLinkIndices": [],
        "lightphases": [
          {
            "time": 5,
            "availableRoadLinks": []
          },
          {
            "time": 30,
            "availableRoadLinks": []
          },
          {
            "time": 30,
            "availableRoadLinks": []
          },
          {
            "time": 30,
            "availableRoadLinks": []
          },
          {
            "time": 30,
            "availableRoadLinks": []
          },
          {
            "time": 30,
            "availableRoadLinks": []
          },
          {
            "time": 30,
            "availableRoadLinks": []
          },
          {
            "time": 30,
            "availableRoadLinks": []
          },
          {
            "time": 30,
            "availableRoadLinks": []
          }
        ]
      },
      "virtual": true
    },
    {
      "id": "intersection_1_0",
      "point": {
        "x": 0,
        "y": -300
      },
      "width": 0,
      "roads": [
        "road_1_1_3",
        "road_1_0_1"
      ],
      "roadLinks": [],
      "trafficLight": {
        "roadLinkIndices": [],
        "lightphases": [
          {
            "time": 5,
            "availableRoadLinks": []
          },
          {
            "time": 30,
            "availableRoadLinks": []
          },
          {
            "time": 30,
            "availableRoadLinks": []
          },
          {
            "time": 30,
            "availableRoadLinks": []
          },
          {
            "time": 30,
            "availableRoadLinks": []
          },
          {
            "time": 30,
            "availableRoadLinks": []
          },
          {
            "time": 30,
            "availableRoadLinks": []
          },
          {
            "time": 30,
            "availableRoadLinks": []
          },
          {
            "time": 30,
            "availableRoadLinks": []
          }
        ]
      },
      "virtual": true
    },
    {
      "id": "intersection_1_1",
      "point": {
        "x": 0,
        "y": 0
      },
      "width": 11,
      "roads": [
        "road_0_1_0",
        "road_1_0_1",
        "road_2_1_2",
        "road_1_2_3",
        "road_1_1_0",
        "road_1_1_1",
        "road_1_1_2",
        "road_1_1_3"
      ],
      "roadLinks": [
        {
          "type": "go_straight",
          "startRoad": "road_0_1_0",
          "endRoad": "road_1_1_0",
          "direction": 0,
          "laneLinks": [
            {
              "startLaneIndex": 1,
              "endLaneIndex": 0,
              "points": [
                {
                  "x": -11.0,
                  "y": -4.5
                },
                {
                  "x": -9.592,
                  "y": -4.416
                },
                {
                  "x": -7.656,
                  "y": -4.188
                },
                {
                  "x": -5.324,
                  "y": -3.852
                },
                {
                  "x": -2.7279999999999998,
                  "y": -3.444
                },
                {
                  "x": 0.0,
                  "y": -3.0
                },
                {
                  "x": 2.7279999999999998,
                  "y": -2.556
                },
                {
                  "x": 5.323999999999999,
                  "y": -2.148
                },
                {
                  "x": 7.655999999999999,
                  "y": -1.811999999999999
                },
                {
                  "x": 9.592,
                  "y": -1.584
                },
                {
                  "x": 11.0,
                  "y": -1.5
                }
              ]
            },
            {
              "startLaneIndex": 1,
              "endLaneIndex": 1,
              "points": [
                {
                  "x": -11.0,
                  "y": -4.5
                },
                {
                  "x": -9.592,
                  "y": -4.5
                },
                {
                  "x": -7.656,
                  "y": -4.5
                },
                {
                  "x": -5.324,
                  "y": -4.5
                },
                {
                  "x": -2.7279999999999998,
                  "y": -4.5
                },
                {
                  "x": 0.0,
                  "y": -4.5
                },
                {
                  "x": 2.7279999999999998,
                  "y": -4.5
                },
                {
                  "x": 5.323999999999999,
                  "y": -4.5
                },
                {
                  "x": 7.655999999999999,
                  "y": -4.499999999999999
                },
                {
                  "x": 9.592,
                  "y": -4.5
                },
                {
                  "x": 11.0,
                  "y": -4.5
                }
              ]
            },
            {
              "startLaneIndex": 1,
              "endLaneIndex": 2,
              "points": [
                {
                  "x": -11.0,
                  "y": -4.5
                },
                {
                  "x": -9.592,
                  "y": -4.584
                },
                {
                  "x": -7.656,
                  "y": -4.812
                },
                {
                  "x": -5.324,
                  "y": -5.148
                },
                {
                  "x": -2.7279999999999998,
                  "y": -5.556
                },
                {
                  "x": 0.0,
                  "y": -6.0
                },
                {
                  "x": 2.7279999999999998,
                  "y": -6.444
                },
                {
                  "x": 5.323999999999999,
                  "y": -6.852
                },
                {
                  "x": 7.655999999999999,
                  "y": -7.187999999999999
                },
                {
                  "x": 9.592,
                  "y": -7.416
                },
                {
                  "x": 11.0,
                  "y": -7.5
                }
              ]
            }
          ]
        },
        {
          "type": "turn_left",
          "startRoad": "road_0_1_0",
          "endRoad": "road_1_1_1",
          "direction": 0,
          "laneLinks": [
            {
              "startLaneIndex": 0,
              "endLaneIndex": 0,
              "points": [
                {
                  "x": -11.0,
                  "y": -1.5
                },
                {
                  "x": -9.759,
                  "y": -1.249
                },
                {
                  "x": -8.292,
                  "y": -0.552
                },
                {
                  "x": -6.683,
                  "y": 0.507
                },
                {
                  "x": -5.016,
                  "y": 1.844
                },
                {
                  "x": -3.375,
                  "y": 3.375
                },
                {
                  "x": -1.844,
                  "y": 5.016
                },
                {
                  "x": -0.507000000000001,
                  "y": 6.683
                },
                {
                  "x": 0.551999999999999,
                  "y": 8.292
                },
                {
                  "x": 1.249,
                  "y": 9.759
                },
                {
                  "x": 1.5,
                  "y": 11.0
                }
              ]
            },
            {
              "startLaneIndex": 0,
              "endLaneIndex": 1,
              "points": [
                {
                  "x": -11.0,
                  "y": -1.5
                },
                {
                  "x": -9.675,
                  "y": -1.249
                },
                {
                  "x": -7.98,
                  "y": -0.552
                },
                {
                  "x": -6.035,
                  "y": 0.507
                },
                {
                  "x": -3.96,
                  "y": 1.844
                },
                {
                  "x": -1.875,
                  "y": 3.375
                },
                {
                  "x": 0.1,
                  "y": 5.016
                },
                {
                  "x": 1.844999999999999,
                  "y": 6.683
                },
                {
                  "x": 3.239999999999999,
                  "y": 8.292
                },
                {
                  "x": 4.165,
                  "y": 9.759
                },
                {
                  "x": 4.5,
                  "y": 11.0
                }
              ]
            },
            {
              "startLaneIndex": 0,
              "endLaneIndex": 2,
              "points": [
                {
                  "x": -11.0,
                  "y": -1.5
                },
                {
                  "x": -9.591,
                  "y": -1.249
                },
                {
                  "x": -7.668,
                  "y": -0.552
                },
                {
                  "x": -5.387,
                  "y": 0.507
                },
                {
                  "x": -2.904,
                  "y": 1.844
                },
                {
                  "x": -0.375,
                  "y": 3.375
                },
                {
                  "x": 2.044,
                  "y": 5.016
                },
                {
                  "x": 4.196999999999999,
                  "y": 6.683
                },
                {
                  "x": 5.927999999999999,
                  "y": 8.292
                },
                {
                  "x": 7.081,
                  "y": 9.759
                },
                {
                  "x": 7.5,
                  "y": 11.0
                }
              ]
            }
          ]
        },
        {
          "type": "turn_right",
          "startRoad": "road_0_1_0",
          "endRoad": "road_1_1_3",
          "direction": 0,
          "laneLinks": [
            {
              "startLaneIndex": 2,
              "endLaneIndex": 0,
              "points": [
                {
                  "x": -11.0,
                  "y": -7.5
                },
                {
                  "x": -9.843,
                  "y": -7.499
                },
                {
                  "x": -8.604,
                  "y": -7.512
                },
                {
                  "x": -7.3309999999999995,
                  "y": -7.563
                },
                {
                  "x": -6.072,
                  "y": -7.676
                },
                {
                  "x": -4.875,
                  "y": -7.875
                },
                {
                  "x": -3.788,
                  "y": -8.184
                },
                {
                  "x": -2.859000000000001,
                  "y": -8.627
                },
                {
                  "x": -2.136000000000001,
                  "y": -9.228
                },
                {
                  "x": -1.6669999999999998,
                  "y": -10.011
                },
                {
                  "x": -1.5,
                  "y": -11.0
                }
              ]
            },
            {
              "startLaneIndex": 2,
              "endLaneIndex": 1,
              "points": [
                {
                  "x": -11.0,
                  "y": -7.5
                },
                {
                  "x": -9.927,
                  "y": -7.499
                },
                {
                  "x": -8.916,
                  "y": -7.512
                },
                {
                  "x": -7.979,
                  "y": -7.563
                },
                {
                  "x": -7.128,
                  "y": -7.676
                },
                {
                  "x": -6.375,
                  "y": -7.875
                },
                {
                  "x": -5.732,
                  "y": -8.184
                },
                {
                  "x": -5.211000000000001,
                  "y": -8.627
                },
                {
                  "x": -4.824000000000001,
                  "y": -9.228
                },
                {
                  "x": -4.583,
                  "y": -10.011
                },
                {
                  "x": -4.5,
                  "y": -11.0
                }
              ]
            },
            {
              "startLaneIndex": 2,
              "endLaneIndex": 2,
              "points": [
                {
                  "x": -11.0,
                  "y": -7.5
                },
                {
                  "x": -10.011,
                  "y": -7.499
                },
                {
                  "x": -9.228,
                  "y": -7.512
                },
                {
                  "x": -8.627,
                  "y": -7.563
                },
                {
                  "x": -8.184,
                  "y": -7.676
                },
                {
                  "x": -7.875,
                  "y": -7.875
                },
                {
                  "x": -7.676,
                  "y": -8.184
                },
                {
                  "x": -7.563000000000001,
                  "y": -8.627
                },
                {
                  "x": -7.512000000000001,
                  "y": -9.228
                },
                {
                  "x": -7.499,
                  "y": -10.011
                },
                {
                  "x": -7.5,
                  "y": -11.0
                }
              ]
            }
          ]
        },
        {
          "type": "turn_right",
          "startRoad": "road_1_0_1",
          "endRoad": "road_1_1_0",
          "direction": 1,
          "laneLinks": [
            {
              "startLaneIndex": 2,
              "endLaneIndex": 0,
              "points": [
                {
                  "x": 7.5,
                  "y": -11.0
                },
                {
                  "x": 7.499,
                  "y": -9.843
                },
                {
                  "x": 7.512,
                  "y": -8.604
                },
                {
                  "x": 7.563,
                  "y": -7.3309999999999995
                },
                {
                  "x": 7.676,
                  "y": -6.072
                },
                {
                  "x": 7.875,
                  "y": -4.875
                },
                {
                  "x": 8.184,
                  "y": -3.788
                },
                {
                  "x": 8.627,
                  "y": -2.859000000000001
                },
                {
                  "x": 9.228,
                  "y": -2.136000000000001
                },
                {
                  "x": 10.011,
                  "y": -1.6669999999999998
                },
                {
                  "x": 11.0,
                  "y": -1.5
                }
              ]
            },
            {
              "startLaneIndex": 2,
              "endLaneIndex": 1,
              "points": [
                {
                  "x": 7.5,
                  "y": -11.0
                },
                {
                  "x": 7.499,
                  "y": -9.927
                },
                {
                  "x": 7.512,
                  "y": -8.916
                },
                {
                  "x": 7.563,
                  "y": -7.979
                },
                {
                  "x": 7.676,
                  "y": -7.128
                },
                {
                  "x": 7.875,
                  "y": -6.375
                },
                {
                  "x": 8.184,
                  "y": -5.732
                },
                {
                  "x": 8.627,
                  "y": -5.211000000000001
                },
                {
                  "x": 9.228,
                  "y": -4.824000000000001
                },
                {
                  "x": 10.011,
                  "y": -4.583
                },
                {
                  "x": 11.0,
                  "y": -4.5
                }
              ]
            },
            {
              "startLaneIndex": 2,
              "endLaneIndex": 2,
              "points": [
                {
                  "x": 7.5,
                  "y": -11.0
                },
                {
                  "x": 7.499,
                  "y": -10.011
                },
                {
                  "x": 7.512,
                  "y": -9.228
                },
                {
                  "x": 7.563,
                  "y": -8.627
                },
                {
                  "x": 7.676,
                  "y": -8.184
                },
                {
                  "x": 7.875,
                  "y": -7.875
                },
                {
                  "x": 8.184,
                  "y": -7.676
                },
                {
                  "x": 8.627,
                  "y": -7.563000000000001
                },
                {
                  "x": 9.228,
                  "y": -7.512000000000001
                },
                {
                  "x": 10.011,
                  "y": -7.499
                },
                {
                  "x": 11.0,
                  "y": -7.5
                }
              ]
            }
          ]
        },
        {
          "type": "go_straight",
          "startRoad": "road_1_0_1",
          "endRoad": "road_1_1_1",
          "direction": 1,
          "laneLinks": [
            {
              "startLaneIndex": 1,
              "endLaneIndex": 0,
              "points": [
                {
                  "x": 4.5,
                  "y": -11.0
                },
                {
                  "x": 4.416,
                  "y": -9.592
                },
                {
                  "x": 4.188,
                  "y": -7.656
                },
                {
                  "x": 3.852,
                  "y": -5.324
                },
                {
                  "x": 3.444,
                  "y": -2.7279999999999998
                },
                {
                  "x": 3.0,
                  "y": 0.0
                },
                {
                  "x": 2.556,
                  "y": 2.7279999999999998
                },
                {
                  "x": 2.148,
                  "y": 5.323999999999999
                },
                {
                  "x": 1.811999999999999,
                  "y": 7.655999999999999
                },
                {
                  "x": 1.584,
                  "y": 9.592
                },
                {
                  "x": 1.5,
                  "y": 11.0
                }
              ]
            },
            {
              "startLaneIndex": 1,
              "endLaneIndex": 1,
              "points": [
                {
                  "x": 4.5,
                  "y": -11.0
                },
                {
                  "x": 4.5,
                  "y": -9.592
                },
                {
                  "x": 4.5,
                  "y": -7.656
                },
                {
                  "x": 4.5,
                  "y": -5.324
                },
                {
                  "x": 4.5,
                  "y": -2.7279999999999998
                },
                {
                  "x": 4.5,
                  "y": 0.0
                },
                {
                  "x": 4.5,
                  "y": 2.7279999999999998
                },
                {
                  "x": 4.5,
                  "y": 5.323999999999999
                },
                {
                  "x": 4.499999999999999,
                  "y": 7.655999999999999
                },
                {
                  "x": 4.5,
                  "y": 9.592
                },
                {
                  "x": 4.5,
                  "y": 11.0
                }
              ]
            },
            {
              "startLaneIndex": 1,
              "endLaneIndex": 2,
              "points": [
                {
                  "x": 4.5,
                  "y": -11.0
                },
                {
                  "x": 4.584,
                  "y": -9.592
                },
                {
                  "x": 4.812,
                  "y": -7.656
                },
                {
                  "x": 5.148,
                  "y": -5.324
                },
                {
                  "x": 5.556,
                  "y": -2.7279999999999998
                },
                {
                  "x": 6.0,
                  "y": 0.0
                },
                {
                  "x": 6.444,
                  "y": 2.7279999999999998
                },
                {
                  "x": 6.852,
                  "y": 5.323999999999999
                },
                {
                  "x": 7.187999999999999,
                  "y": 7.655999999999999
                },
                {
                  "x": 7.416,
                  "y": 9.592
                },
                {
                  "x": 7.5,
                  "y": 11.0
                }
              ]
            }
          ]
        },
        {
          "type": "turn_left",
          "startRoad": "road_1_0_1",
          "endRoad": "road_1_1_2",
          "direction": 1,
          "laneLinks": [
            {
              "startLaneIndex": 0,
              "endLaneIndex": 0,
              "points": [
                {
                  "x": 1.5,
                  "y": -11.0
                },
                {
                  "x": 1.249,
                  "y": -9.759
                },
                {
                  "x": 0.552,
                  "y": -8.292
                },
                {
                  "x": -0.507,
                  "y": -6.683
                },
                {
                  "x": -1.844,
                  "y": -5.016
                },
                {
                  "x": -3.375,
                  "y": -3.375
                },
                {
                  "x": -5.016,
                  "y": -1.844
                },
                {
                  "x": -6.683,
                  "y": -0.507000000000001
                },
                {
                  "x": -8.292,
                  "y": 0.551999999999999
                },
                {
                  "x": -9.759,
                  "y": 1.249
                },
                {
                  "x": -11.0,
                  "y": 1.5
                }
              ]
            },
            {
              "startLaneIndex": 0,
              "endLaneIndex": 1,
              "points": [
                {
                  "x": 1.5,
                  "y": -11.0
                },
                {
                  "x": 1.249,
                  "y": -9.675
                },
                {
                  "x": 0.552,
                  "y": -7.98
                },
                {
                  "x": -0.507,
                  "y": -6.035
                },
                {
                  "x": -1.844,
                  "y": -3.96
                },
                {
                  "x": -3.375,
                  "y": -1.875
                },
                {
                  "x": -5.016,
                  "y": 0.1
                },
                {
                  "x": -6.683,
                  "y": 1.844999999999999
                },
                {
                  "x": -8.292,
                  "y": 3.239999999999999
                },
                {
                  "x": -9.759,
                  "y": 4.165
                },
                {
                  "x": -11.0,
                  "y": 4.5
                }
              ]
            },
            {
              "startLaneIndex": 0,
              "endLaneIndex": 2,
              "points": [
                {
                  "x": 1.5,
                  "y": -11.0
                },
                {
                  "x": 1.249,
                  "y": -9.591
                },
                {
                  "x": 0.552,
                  "y": -7.668
                },
                {
                  "x": -0.507,
                  "y": -5.387
                },
                {
                  "x": -1.844,
                  "y": -2.904
                },
                {
                  "x": -3.375,
                  "y": -0.375
                },
                {
                  "x": -5.016,
                  "y": 2.044
                },
                {
                  "x": -6.683,
                  "y": 4.196999999999999
                },
                {
                  "x": -8.292,
                  "y": 5.927999999999999
                },
                {
                  "x": -9.759,
                  "y": 7.081
                },
                {
                  "x": -11.0,
                  "y": 7.5
                }
              ]
            }
          ]
        },
        {
          "type": "turn_right",
          "startRoad": "road_2_1_2",
          "endRoad": "road_1_1_1",
          "direction": 2,
          "laneLinks": [
            {
              "startLaneIndex": 2,
              "endLaneIndex": 0,
              "points": [
                {
                  "x": 11.0,
                  "y": 7.5
                },
                {
                  "x": 9.843,
                  "y": 7.499
                },
                {
                  "x": 8.604,
                  "y": 7.512
                },
                {
                  "x": 7.3309999999999995,
                  "y": 7.563
                },
                {
                  "x": 6.072,
                  "y": 7.676
                },
                {
                  "x": 4.875,
                  "y": 7.875
                },
                {
                  "x": 3.788,
                  "y": 8.184
                },
                {
                  "x": 2.859000000000001,
                  "y": 8.627
                },
                {
                  "x": 2.136000000000001,
                  "y": 9.228
                },
                {
                  "x": 1.6669999999999998,
                  "y": 10.011
                },
                {
                  "x": 1.5,
                  "y": 11.0
                }
              ]
            },
            {
              "startLaneIndex": 2,
              "endLaneIndex": 1,
              "points": [
                {
                  "x": 11.0,
                  "y": 7.5
                },
                {
                  "x": 9.927,
                  "y": 7.499
                },
                {
                  "x": 8.916,
                  "y": 7.512
                },
                {
                  "x": 7.979,
                  "y": 7.563
                },
                {
                  "x": 7.128,
                  "y": 7.676
                },
                {
                  "x": 6.375,
                  "y": 7.875
                },
                {
                  "x": 5.732,
                  "y": 8.184
                },
                {
                  "x": 5.211000000000001,
                  "y": 8.627
                },
                {
                  "x": 4.824000000000001,
                  "y": 9.228
                },
                {
                  "x": 4.583,
                  "y": 10.011
                },
                {
                  "x": 4.5,
                  "y": 11.0
                }
              ]
            },
            {
              "startLaneIndex": 2,
              "endLaneIndex": 2,
              "points": [
                {
                  "x": 11.0,
                  "y": 7.5
                },
                {
                  "x": 10.011,
                  "y": 7.499
                },
                {
                  "x": 9.228,
                  "y": 7.512
                },
                {
                  "x": 8.627,
                  "y": 7.563
                },
                {
                  "x": 8.184,
                  "y": 7.676
                },
                {
                  "x": 7.875,
                  "y": 7.875
                },
                {
                  "x": 7.676,
                  "y": 8.184
                },
                {
                  "x": 7.563000000000001,
                  "y": 8.627
                },
                {
                  "x": 7.512000000000001,
                  "y": 9.228
                },
                {
                  "x": 7.499,
                  "y": 10.011
                },
                {
                  "x": 7.5,
                  "y": 11.0
                }
              ]
            }
          ]
        },
        {
          "type": "go_straight",
          "startRoad": "road_2_1_2",
          "endRoad": "road_1_1_2",
          "direction": 2,
          "laneLinks": [
            {
              "startLaneIndex": 1,
              "endLaneIndex": 0,
              "points": [
                {
                  "x": 11.0,
                  "y": 4.5
                },
                {
                  "x": 9.592,
                  "y": 4.416
                },
                {
                  "x": 7.656,
                  "y": 4.188
                },
                {
                  "x": 5.324,
                  "y": 3.852
                },
                {
                  "x": 2.7279999999999998,
                  "y": 3.444
                },
                {
                  "x": 0.0,
                  "y": 3.0
                },
                {
                  "x": -2.7279999999999998,
                  "y": 2.556
                },
                {
                  "x": -5.323999999999999,
                  "y": 2.148
                },
                {
                  "x": -7.655999999999999,
                  "y": 1.811999999999999
                },
                {
                  "x": -9.592,
                  "y": 1.584
                },
                {
                  "x": -11.0,
                  "y": 1.5
                }
              ]
            },
            {
              "startLaneIndex": 1,
              "endLaneIndex": 1,
              "points": [
                {
                  "x": 11.0,
                  "y": 4.5
                },
                {
                  "x": 9.592,
                  "y": 4.5
                },
                {
                  "x": 7.656,
                  "y": 4.5
                },
                {
                  "x": 5.324,
                  "y": 4.5
                },
                {
                  "x": 2.7279999999999998,
                  "y": 4.5
                },
                {
                  "x": 0.0,
                  "y": 4.5
                },
                {
                  "x": -2.7279999999999998,
                  "y": 4.5
                },
                {
                  "x": -5.323999999999999,
                  "y": 4.5
                },
                {
                  "x": -7.655999999999999,
                  "y": 4.499999999999999
                },
                {
                  "x": -9.592,
                  "y": 4.5
                },
                {
                  "x": -11.0,
                  "y": 4.5
                }
              ]
            },
            {
              "startLaneIndex": 1,
              "endLaneIndex": 2,
              "points": [
                {
                  "x": 11.0,
                  "y": 4.5
                },
                {
                  "x": 9.592,
                  "y": 4.584
                },
                {
                  "x": 7.656,
                  "y": 4.812
                },
                {
                  "x": 5.324,
                  "y": 5.148
                },
                {
                  "x": 2.7279999999999998,
                  "y": 5.556
                },
                {
                  "x": 0.0,
                  "y": 6.0
                },
                {
                  "x": -2.7279999999999998,
                  "y": 6.444
                },
                {
                  "x": -5.323999999999999,
                  "y": 6.852
                },
                {
                  "x": -7.655999999999999,
                  "y": 7.187999999999999
                },
                {
                  "x": -9.592,
                  "y": 7.416
                },
                {
                  "x": -11.0,
                  "y": 7.5
                }
              ]
            }
          ]
        },
        {
          "type": "turn_left",
          "startRoad": "road_2_1_2",
          "endRoad": "road_1_1_3",
          "direction": 2,
          "laneLinks": [
            {
              "startLaneIndex": 0,
              "endLaneIndex": 0,
              "points": [
                {
                  "x": 11.0,
                  "y": 1.5
                },
                {
                  "x": 9.759,
                  "y": 1.249
                },
                {
                  "x": 8.292,
                  "y": 0.552
                },
                {
                  "x": 6.683,
                  "y": -0.507
                },
                {
                  "x": 5.016,
                  "y": -1.844
                },
                {
                  "x": 3.375,
                  "y": -3.375
                },
                {
                  "x": 1.844,
                  "y": -5.016
                },
                {
                  "x": 0.507000000000001,
                  "y": -6.683
                },
                {
                  "x": -0.551999999999999,
                  "y": -8.292
                },
                {
                  "x": -1.249,
                  "y": -9.759
                },
                {
                  "x": -1.5,
                  "y": -11.0
                }
              ]
            },
            {
              "startLaneIndex": 0,
              "endLaneIndex": 1,
              "points": [
                {
                  "x": 11.0,
                  "y": 1.5
                },
                {
                  "x": 9.675,
                  "y": 1.249
                },
                {
                  "x": 7.98,
                  "y": 0.552
                },
                {
                  "x": 6.035,
                  "y": -0.507
                },
                {
                  "x": 3.96,
                  "y": -1.844
                },
                {
                  "x": 1.875,
                  "y": -3.375
                },
                {
                  "x": -0.1,
                  "y": -5.016
                },
                {
                  "x": -1.844999999999999,
                  "y": -6.683
                },
                {
                  "x": -3.239999999999999,
                  "y": -8.292
                },
                {
                  "x": -4.165,
                  "y": -9.759
                },
                {
                  "x": -4.5,
                  "y": -11.0
                }
              ]
            },
            {
              "startLaneIndex": 0,
              "endLaneIndex": 2,
              "points": [
                {
                  "x": 11.0,
                  "y": 1.5
                },
                {
                  "x": 9.591,
                  "y": 1.249
                },
                {
                  "x": 7.668,
                  "y": 0.552
                },
                {
                  "x": 5.387,
                  "y": -0.507
                },
                {
                  "x": 2.904,
                  "y": -1.844
                },
                {
                  "x": 0.375,
                  "y": -3.375
                },
                {
                  "x": -2.044,
                  "y": -5.016
                },
                {
                  "x": -4.196999999999999,
                  "y": -6.683
                },
                {
                  "x": -5.927999999999999,
                  "y": -8.292
                },
                {
                  "x": -7.081,
                  "y": -9.759
                },
                {
                  "x": -7.5,
                  "y": -11.0
                }
              ]
            }
          ]
        },
        {
          "type": "turn_left",
          "startRoad": "road_1_2_3",
          "endRoad": "road_1_1_0",
          "direction": 3,
          "laneLinks": [
            {
              "startLaneIndex": 0,
              "endLaneIndex": 0,
              "points": [
                {
                  "x": -1.5,
                  "y": 11.0
                },
                {
                  "x": -1.249,
                  "y": 9.759
                },
                {
                  "x": -0.552,
                  "y": 8.292
                },
                {
                  "x": 0.507,
                  "y": 6.683
                },
                {
                  "x": 1.844,
                  "y": 5.016
                },
                {
                  "x": 3.375,
                  "y": 3.375
                },
                {
                  "x": 5.016,
                  "y": 1.844
                },
                {
                  "x": 6.683,
                  "y": 0.507000000000001
                },
                {
                  "x": 8.292,
                  "y": -0.551999999999999
                },
                {
                  "x": 9.759,
                  "y": -1.249
                },
                {
                  "x": 11.0,
                  "y": -1.5
                }
              ]
            },
            {
              "startLaneIndex": 0,
              "endLaneIndex": 1,
              "points": [
                {
                  "x": -1.5,
                  "y": 11.0
                },
                {
                  "x": -1.249,
                  "y": 9.675
                },
                {
                  "x": -0.552,
                  "y": 7.98
                },
                {
                  "x": 0.507,
                  "y": 6.035
                },
                {
                  "x": 1.844,
                  "y": 3.96
                },
                {
                  "x": 3.375,
                  "y": 1.875
                },
                {
                  "x": 5.016,
                  "y": -0.1
                },
                {
                  "x": 6.683,
                  "y": -1.844999999999999
                },
                {
                  "x": 8.292,
                  "y": -3.239999999999999
                },
                {
                  "x": 9.759,
                  "y": -4.165
                },
                {
                  "x": 11.0,
                  "y": -4.5
                }
              ]
            },
            {
              "startLaneIndex": 0,
              "endLaneIndex": 2,
              "points": [
                {
                  "x": -1.5,
                  "y": 11.0
                },
                {
                  "x": -1.249,
                  "y": 9.591
                },
                {
                  "x": -0.552,
                  "y": 7.668
                },
                {
                  "x": 0.507,
                  "y": 5.387
                },
                {
                  "x": 1.844,
                  "y": 2.904
                },
                {
                  "x": 3.375,
                  "y": 0.375
                },
                {
                  "x": 5.016,
                  "y": -2.044
                },
                {
                  "x": 6.683,
                  "y": -4.196999999999999
                },
                {
                  "x": 8.292,
                  "y": -5.927999999999999
                },
                {
                  "x": 9.759,
                  "y": -7.081
                },
                {
                  "x": 11.0,
                  "y": -7.5
                }
              ]
            }
          ]
        },
        {
          "type": "turn_right",
          "startRoad": "road_1_2_3",
          "endRoad": "road_1_1_2",
          "direction": 3,
          "laneLinks": [
            {
              "startLaneIndex": 2,
              "endLaneIndex": 0,
              "points": [
                {
                  "x": -7.5,
                  "y": 11.0
                },
                {
                  "x": -7.499,
                  "y": 9.843
                },
                {
                  "x": -7.512,
                  "y": 8.604
                },
                {
                  "x": -7.563,
                  "y": 7.3309999999999995
                },
                {
                  "x": -7.676,
                  "y": 6.072
                },
                {
                  "x": -7.875,
                  "y": 4.875
                },
                {
                  "x": -8.184,
                  "y": 3.788
                },
                {
                  "x": -8.627,
                  "y": 2.859000000000001
                },
                {
                  "x": -9.228,
                  "y": 2.136000000000001
                },
                {
                  "x": -10.011,
                  "y": 1.6669999999999998
                },
                {
                  "x": -11.0,
                  "y": 1.5
                }
              ]
            },
            {
              "startLaneIndex": 2,
              "endLaneIndex": 1,
              "points": [
                {
                  "x": -7.5,
                  "y": 11.0
                },
                {
                  "x": -7.499,
                  "y": 9.927
                },
                {
                  "x": -7.512,
                  "y": 8.916
                },
                {
                  "x": -7.563,
                  "y": 7.979
                },
                {
                  "x": -7.676,
                  "y": 7.128
                },
                {
                  "x": -7.875,
                  "y": 6.375
                },
                {
                  "x": -8.184,
                  "y": 5.732
                },
                {
                  "x": -8.627,
                  "y": 5.211000000000001
                },
                {
                  "x": -9.228,
                  "y": 4.824000000000001
                },
                {
                  "x": -10.011,
                  "y": 4.583
                },
                {
                  "x": -11.0,
                  "y": 4.5
                }
              ]
            },
            {
              "startLaneIndex": 2,
              "endLaneIndex": 2,
              "points": [
                {
                  "x": -7.5,
                  "y": 11.0
                },
                {
                  "x": -7.499,
                  "y": 10.011
                },
                {
                  "x": -7.512,
                  "y": 9.228
                },
                {
                  "x": -7.563,
                  "y": 8.627
                },
                {
                  "x": -7.676,
                  "y": 8.184
                },
                {
                  "x": -7.875,
                  "y": 7.875
                },
                {
                  "x": -8.184,
                  "y": 7.676
                },
                {
                  "x": -8.627,
                  "y": 7.563000000000001
                },
                {
                  "x": -9.228,
                  "y": 7.512000000000001
                },
                {
                  "x": -10.011,
                  "y": 7.499
                },
                {
                  "x": -11.0,
                  "y": 7.5
                }
              ]
            }
          ]
        },
        {
          "type": "go_straight",
          "startRoad": "road_1_2_3",
          "endRoad": "road_1_1_3",
          "direction": 3,
          "laneLinks": [
            {
              "startLaneIndex": 1,
              "endLaneIndex": 0,
              "points": [
                {
                  "x": -4.5,
                  "y": 11.0
                },
                {
                  "x": -4.416,
                  "y": 9.592
                },
                {
                  "x": -4.188,
                  "y": 7.656
                },
                {
                  "x": -3.852,
                  "y": 5.324
                },
                {
                  "x": -3.444,
                  "y": 2.7279999999999998
                },
                {
                  "x": -3.0,
                  "y": 0.0
                },
                {
                  "x": -2.556,
                  "y": -2.7279999999999998
                },
                {
                  "x": -2.148,
                  "y": -5.323999999999999
                },
                {
                  "x": -1.811999999999999,
                  "y": -7.655999999999999
                },
                {
                  "x": -1.584,
                  "y": -9.592
                },
                {
                  "x": -1.5,
                  "y": -11.0
                }
              ]
            },
            {
              "startLaneIndex": 1,
              "endLaneIndex": 1,
              "points": [
                {
                  "x": -4.5,
                  "y": 11.0
                },
                {
                  "x": -4.5,
                  "y": 9.592
                },
                {
                  "x": -4.5,
                  "y": 7.656
                },
                {
                  "x": -4.5,
                  "y": 5.324
                },
                {
                  "x": -4.5,
                  "y": 2.7279999999999998
                },
                {
                  "x": -4.5,
                  "y": 0.0
                },
                {
                  "x": -4.5,
                  "y": -2.7279999999999998
                },
                {
                  "x": -4.5,
                  "y": -5.323999999999999
                },
                {
                  "x": -4.499999999999999,
                  "y": -7.655999999999999
                },
                {
                  "x": -4.5,
                  "y": -9.592
                },
                {
                  "x": -4.5,
                  "y": -11.0
                }
              ]
            },
            {
              "startLaneIndex": 1,
              "endLaneIndex": 2,
              "points": [
                {
                  "x": -4.5,
                  "y": 11.0
                },
                {
                  "x": -4.584,
                  "y": 9.592
                },
                {
                  "x": -4.812,
                  "y": 7.656
                },
                {
                  "x": -5.148,
                  "y": 5.324
                },
                {
                  "x": -5.556,
                  "y": 2.7279999999999998
                },
                {
                  "x": -6.0,
                  "y": 0.0
                },
                {
                  "x": -6.444,
                  "y": -2.7279999999999998
                },
                {
                  "x": -6.852,
                  "y": -5.323999999999999
                },
                {
                  "x": -7.187999999999999,
                  "y": -7.655999999999999
                },
                {
                  "x": -7.416,
                  "y": -9.592
                },
                {
                  "x": -7.5,
                  "y": -11.0
                }
              ]
            }
          ]
        }
      ],
      "trafficLight": {
        "roadLinkIndices": [
          0,
          1,
          2,
          3,
          4,
          5,
          6,
          7,
          8,
          9,
          10,
          11
        ],
        "lightphases": [
          {
            "time": 5,
            "availableRoadLinks": [
              10,
              2,
              3,
              6
            ]
          },
          {
            "time": 30,
            "availableRoadLinks": [
              0,
              2,
              3,
              6,
              7,
              10
            ]
          },
          {
            "time": 30,
            "availableRoadLinks": [
              2,
              3,
              4,
              6,
              10,
              11
            ]
          },
          {
            "time": 30,
            "availableRoadLinks": [
              1,
              2,
              3,
              6,
              8,
              10
            ]
          },
          {
            "time": 30,
            "availableRoadLinks": [
              2,
              3,
              5,
              6,
              9,
              10
            ]
          },
          {
            "time": 30,
            "availableRoadLinks": [
              0,
              1,
              2,
              3,
              6,
              10
            ]
          },
          {
            "time": 30,
            "availableRoadLinks": [
              2,
              3,
              6,
              7,
              8,
              10
            ]
          },
          {
            "time": 30,
            "availableRoadLinks": [
              2,
              3,
              4,
              5,
              6,
              10
            ]
          },
          {
            "time": 30,
            "availableRoadLinks": [
              2,
              3,
              6,
              9,
              10,
              11
            ]
          }
        ]
      },
      "virtual": false
    },
    {
      "id": "intersection_1_2",
      "point": {
        "x": 0,
        "y": 300
      },
      "width": 11,
      "roads": [
        "road_0_2_0",
        "road_1_1_1",
        "road_2_2_2",
        "road_1_3_3",
        "road_1_2_0",
        "road_1_2_1",
        "road_1_2_2",
        "road_1_2_3"
      ],
      "roadLinks": [
        {
          "type": "go_straight",
          "startRoad": "road_0_2_0",
          "endRoad": "road_1_2_0",
          "direction": 0,
          "laneLinks": [
            {
              "startLaneIndex": 1,
              "endLaneIndex": 0,
              "points": [
                {
                  "x": -11.0,
                  "y": 295.5
                },
                {
                  "x": -9.592,
                  "y": 295.584
                },
                {
                  "x": -7.656,
                  "y": 295.812
                },
                {
                  "x": -5.324,
                  "y": 296.148
                },
                {
                  "x": -2.7279999999999998,
                  "y": 296.556
                },
                {
                  "x": 0.0,
                  "y": 297.0
                },
                {
                  "x": 2.7279999999999998,
                  "y": 297.444
                },
                {
                  "x": 5.323999999999999,
                  "y": 297.852
                },
                {
                  "x": 7.655999999999999,
                  "y": 298.188
                },
                {
                  "x": 9.592,
                  "y": 298.416
                },
                {
                  "x": 11.0,
                  "y": 298.5
                }
              ]
            },
            {
              "startLaneIndex": 1,
              "endLaneIndex": 1,
              "points": [
                {
                  "x": -11.0,
                  "y": 295.5
                },
                {
                  "x": -9.592,
                  "y": 295.5
                },
                {
                  "x": -7.656,
                  "y": 295.5
                },
                {
                  "x": -5.324,
                  "y": 295.5
                },
                {
                  "x": -2.7279999999999998,
                  "y": 295.5
                },
                {
                  "x": 0.0,
                  "y": 295.5
                },
                {
                  "x": 2.7279999999999998,
                  "y": 295.5
                },
                {
                  "x": 5.323999999999999,
                  "y": 295.5
                },
                {
                  "x": 7.655999999999999,
                  "y": 295.5
                },
                {
                  "x": 9.592,
                  "y": 295.5
                },
                {
                  "x": 11.0,
                  "y": 295.5
                }
              ]
            },
            {
              "startLaneIndex": 1,
              "endLaneIndex": 2,
              "points": [
                {
                  "x": -11.0,
                  "y": 295.5
                },
                {
                  "x": -9.592,
                  "y": 295.416
                },
                {
                  "x": -7.656,
                  "y": 295.188
                },
                {
                  "x": -5.324,
                  "y": 294.852
                },
                {
                  "x": -2.7279999999999998,
                  "y": 294.444
                },
                {
                  "x": 0.0,
                  "y": 294.0
                },
                {
                  "x": 2.7279999999999998,
                  "y": 293.556
                },
                {
                  "x": 5.323999999999999,
                  "y": 293.148
                },
                {
                  "x": 7.655999999999999,
                  "y": 292.812
                },
                {
                  "x": 9.592,
                  "y": 292.584
                },
                {
                  "x": 11.0,
                  "y": 292.5
                }
              ]
            }
          ]
        },
        {
          "type": "turn_left",
          "startRoad": "road_0_2_0",
          "endRoad": "road_1_2_1",
          "direction": 0,
          "laneLinks": [
            {
              "startLaneIndex": 0,
              "endLaneIndex": 0,
              "points": [
                {
                  "x": -11.0,
                  "y": 298.5
                },
                {
                  "x": -9.759,
                  "y": 298.751
                },
                {
                  "x": -8.292,
                  "y": 299.448
                },
                {
                  "x": -6.683,
                  "y": 300.507
                },
                {
                  "x": -5.016,
                  "y": 301.844
                },
                {
                  "x": -3.375,
                  "y": 303.375
                },
                {
                  "x": -1.844,
                  "y": 305.016
                },
                {
                  "x": -0.507000000000001,
                  "y": 306.683
                },
                {
                  "x": 0.551999999999999,
                  "y": 308.292
                },
                {
                  "x": 1.249,
                  "y": 309.759
                },
                {
                  "x": 1.5,
                  "y": 311.0
                }
              ]
            },
            {
              "startLaneIndex": 0,
              "endLaneIndex": 1,
              "points": [
                {
                  "x": -11.0,
                  "y": 298.5
                },
                {
                  "x": -9.675,
                  "y": 298.751
                },
                {
                  "x": -7.98,
                  "y": 299.448
                },
                {
                  "x": -6.035,
                  "y": 300.507
                },
                {
                  "x": -3.96,
                  "y": 301.844
                },
                {
                  "x": -1.875,
                  "y": 303.375
                },
                {
                  "x": 0.1,
                  "y": 305.016
                },
                {
                  "x": 1.844999999999999,
                  "y": 306.683
                },
                {
                  "x": 3.239999999999999,
                  "y": 308.292
                },
                {
                  "x": 4.165,
                  "y": 309.759
                },
                {
                  "x": 4.5,
                  "y": 311.0
                }
              ]
            },
            {
              "startLaneIndex": 0,
              "endLaneIndex": 2,
              "points": [
                {
                  "x": -11.0,
                  "y": 298.5
                },
                {
                  "x": -9.591,
                  "y": 298.751
                },
                {
                  "x": -7.668,
                  "y": 299.448
                },
                {
                  "x": -5.387,
                  "y": 300.507
                },
                {
                  "x": -2.904,
                  "y": 301.844
                },
                {
                  "x": -0.375,
                  "y": 303.375
                },
                {
                  "x": 2.044,
                  "y": 305.016
                },
                {
                  "x": 4.196999999999999,
                  "y": 306.683
                },
                {
                  "x": 5.927999999999999,
                  "y": 308.292
                },
                {
                  "x": 7.081,
                  "y": 309.759
                },
                {
                  "x": 7.5,
                  "y": 311.0
                }
              ]
            }
          ]
        },
        {
          "type": "turn_right",
          "startRoad": "road_0_2_0",
          "endRoad": "road_1_2_3",
          "direction": 0,
          "laneLinks": [
            {
              "startLaneIndex": 2,
              "endLaneIndex": 0,
              "points": [
                {
                  "x": -11.0,
                  "y": 292.5
                },
                {
                  "x": -9.843,
                  "y": 292.501
                },
                {
                  "x": -8.604,
                  "y": 292.488
                },
                {
                  "x": -7.3309999999999995,
                  "y": 292.437
                },
                {
                  "x": -6.072,
                  "y": 292.324
                },
                {
                  "x": -4.875,
                  "y": 292.125
                },
                {
                  "x": -3.788,
                  "y": 291.816
                },
                {
                  "x": -2.859000000000001,
                  "y": 291.373
                },
                {
                  "x": -2.136000000000001,
                  "y": 290.772
                },
                {
                  "x": -1.6669999999999998,
                  "y": 289.98900000000003
                },
                {
                  "x": -1.5,
                  "y": 289.0
                }
              ]
            },
            {
              "startLaneIndex": 2,
              "endLaneIndex": 1,
              "points": [
                {
                  "x": -11.0,
                  "y": 292.5
                },
                {
                  "x": -9.927,
                  "y": 292.501
                },
                {
                  "x": -8.916,
                  "y": 292.488
                },
                {
                  "x": -7.979,
                  "y": 292.437
                },
                {
                  "x": -7.128,
                  "y": 292.324
                },
                {
                  "x": -6.375,
                  "y": 292.125
                },
                {
                  "x": -5.732,
                  "y": 291.816
                },
                {
                  "x": -5.211000000000001,
                  "y": 291.373
                },
                {
                  "x": -4.824000000000001,
                  "y": 290.772
                },
                {
                  "x": -4.583,
                  "y": 289.98900000000003
                },
                {
                  "x": -4.5,
                  "y": 289.0
                }
              ]
            },
            {
              "startLaneIndex": 2,
              "endLaneIndex": 2,
              "points": [
                {
                  "x": -11.0,
                  "y": 292.5
                },
                {
                  "x": -10.011,
                  "y": 292.501
                },
                {
                  "x": -9.228,
                  "y": 292.488
                },
                {
                  "x": -8.627,
                  "y": 292.437
                },
                {
                  "x": -8.184,
                  "y": 292.324
                },
                {
                  "x": -7.875,
                  "y": 292.125
                },
                {
                  "x": -7.676,
                  "y": 291.816
                },
                {
                  "x": -7.563000000000001,
                  "y": 291.373
                },
                {
                  "x": -7.512000000000001,
                  "y": 290.772
                },
                {
                  "x": -7.499,
                  "y": 289.98900000000003
                },
                {
                  "x": -7.5,
                  "y": 289.0
                }
              ]
            }
          ]
        },
        {
          "type": "turn_right",
          "startRoad": "road_1_1_1",
          "endRoad": "road_1_2_0",
          "direction": 1,
          "laneLinks": [
            {
              "startLaneIndex": 2,
              "endLaneIndex": 0,
              "points": [
                {
                  "x": 7.5,
                  "y": 289.0
                },
                {
                  "x": 7.499,
                  "y": 290.157
                },
                {
                  "x": 7.512,
                  "y": 291.396
                },
                {
                  "x": 7.563,
                  "y": 292.669
                },
                {
                  "x": 7.676,
                  "y": 293.928
                },
                {
                  "x": 7.875,
                  "y": 295.125
                },
                {
                  "x": 8.184,
                  "y": 296.212
                },
                {
                  "x": 8.627,
                  "y": 297.141
                },
                {
                  "x": 9.228,
                  "y": 297.864
                },
                {
                  "x": 10.011,
                  "y": 298.333
                },
                {
                  "x": 11.0,
                  "y": 298.5
                }
              ]
            },
            {
              "startLaneIndex": 2,
              "endLaneIndex": 1,
              "points": [
                {
                  "x": 7.5,
                  "y": 289.0
                },
                {
                  "x": 7.499,
                  "y": 290.073
                },
                {
                  "x": 7.512,
                  "y": 291.084
                },
                {
                  "x": 7.563,
                  "y": 292.021
                },
                {
                  "x": 7.676,
                  "y": 292.872
                },
                {
                  "x": 7.875,
                  "y": 293.625
                },
                {
                  "x": 8.184,
                  "y": 294.268
                },
                {
                  "x": 8.627,
                  "y": 294.789
                },
                {
                  "x": 9.228,
                  "y": 295.176
                },
                {
                  "x": 10.011,
                  "y": 295.41700000000003
                },
                {
                  "x": 11.0,
                  "y": 295.5
                }
              ]
            },
            {
              "startLaneIndex": 2,
              "endLaneIndex": 2,
              "points": [
                {
                  "x": 7.5,
                  "y": 289.0
                },
                {
                  "x": 7.499,
                  "y": 289.989
                },
                {
                  "x": 7.512,
                  "y": 290.772
                },
                {
                  "x": 7.563,
                  "y": 291.373
                },
                {
                  "x": 7.676,
                  "y": 291.816
                },
                {
                  "x": 7.875,
                  "y": 292.125
                },
                {
                  "x": 8.184,
                  "y": 292.324
                },
                {
                  "x": 8.627,
                  "y": 292.437
                },
                {
                  "x": 9.228,
                  "y": 292.488
                },
                {
                  "x": 10.011,
                  "y": 292.50100000000003
                },
                {
                  "x": 11.0,
                  "y": 292.5
                }
              ]
            }
          ]
        },
        {
          "type": "go_straight",
          "startRoad": "road_1_1_1",
          "endRoad": "road_1_2_1",
          "direction": 1,
          "laneLinks": [
            {
              "startLaneIndex": 1,
              "endLaneIndex": 0,
              "points": [
                {
                  "x": 4.5,
                  "y": 289.0
                },
                {
                  "x": 4.416,
                  "y": 290.408
                },
                {
                  "x": 4.188,
                  "y": 292.344
                },
                {
                  "x": 3.852,
                  "y": 294.676
                },
                {
                  "x": 3.444,
                  "y": 297.272
                },
                {
                  "x": 3.0,
                  "y": 300.0
                },
                {
                  "x": 2.556,
                  "y": 302.728
                },
                {
                  "x": 2.148,
                  "y": 305.324
                },
                {
                  "x": 1.811999999999999,
                  "y": 307.656
                },
                {
                  "x": 1.584,
                  "y": 309.592
                },
                {
                  "x": 1.5,
                  "y": 311.0
                }
              ]
            },
            {
              "startLaneIndex": 1,
              "endLaneIndex": 1,
              "points": [
                {
                  "x": 4.5,
                  "y": 289.0
                },
                {
                  "x": 4.5,
                  "y": 290.408
                },
                {
                  "x": 4.5,
                  "y": 292.344
                },
                {
                  "x": 4.5,
                  "y": 294.676
                },
                {
                  "x": 4.5,
                  "y": 297.272
                },
                {
                  "x": 4.5,
                  "y": 300.0
                },
                {
                  "x": 4.5,
                  "y": 302.728
                },
                {
                  "x": 4.5,
                  "y": 305.324
                },
                {
                  "x": 4.499999999999999,
                  "y": 307.656
                },
                {
                  "x": 4.5,
                  "y": 309.592
                },
                {
                  "x": 4.5,
                  "y": 311.0
                }
              ]
            },
            {
              "startLaneIndex": 1,
              "endLaneIndex": 2,
              "points": [
                {
                  "x": 4.5,
                  "y": 289.0
                },
                {
                  "x": 4.584,
                  "y": 290.408
                },
                {
                  "x": 4.812,
                  "y": 292.344
                },
                {
                  "x": 5.148,
                  "y": 294.676
                },
                {
                  "x": 5.556,
                  "y": 297.272
                },
                {
                  "x": 6.0,
                  "y": 300.0
                },
                {
                  "x": 6.444,
                  "y": 302.728
                },
                {
                  "x": 6.852,
                  "y": 305.324
                },
                {
                  "x": 7.187999999999999,
                  "y": 307.656
                },
                {
                  "x": 7.416,
                  "y": 309.592
                },
                {
                  "x": 7.5,
                  "y": 311.0
                }
              ]
            }
          ]
        },
        {
          "type": "turn_left",
          "startRoad": "road_1_1_1",
          "endRoad": "road_1_2_2",
          "direction": 1,
          "laneLinks": [
            {
              "startLaneIndex": 0,
              "endLaneIndex": 0,
              "points": [
                {
                  "x": 1.5,
                  "y": 289.0
                },
                {
                  "x": 1.249,
                  "y": 290.241
                },
                {
                  "x": 0.552,
                  "y": 291.70799999999997
                },
                {
                  "x": -0.507,
                  "y": 293.317
                },
                {
                  "x": -1.844,
                  "y": 294.984
                },
                {
                  "x": -3.375,
                  "y": 296.625
                },
                {
                  "x": -5.016,
                  "y": 298.156
                },
                {
                  "x": -6.683,
                  "y": 299.493
                },
                {
                  "x": -8.292,
                  "y": 300.552
                },
                {
                  "x": -9.759,
                  "y": 301.249
                },
                {
                  "x": -11.0,
                  "y": 301.5
                }
              ]
            },
            {
              "startLaneIndex": 0,
              "endLaneIndex": 1,
              "points": [
                {
                  "x": 1.5,
                  "y": 289.0
                },
                {
                  "x": 1.249,
                  "y": 290.325
                },
                {
                  "x": 0.552,
                  "y": 292.02
                },
                {
                  "x": -0.507,
                  "y": 293.965
                },
                {
                  "x": -1.844,
                  "y": 296.04
                },
                {
                  "x": -3.375,
                  "y": 298.125
                },
                {
                  "x": -5.016,
                  "y": 300.1
                },
                {
                  "x": -6.683,
                  "y": 301.845
                },
                {
                  "x": -8.292,
                  "y": 303.24
                },
                {
                  "x": -9.759,
                  "y": 304.165
                },
                {
                  "x": -11.0,
                  "y": 304.5
                }
              ]
            },
            {
              "startLaneIndex": 0,
              "endLaneIndex": 2,
              "points": [
                {
                  "x": 1.5,
                  "y": 289.0
                },
                {
                  "x": 1.249,
                  "y": 290.409
                },
                {
                  "x": 0.552,
                  "y": 292.332
                },
                {
                  "x": -0.507,
                  "y": 294.613
                },
                {
                  "x": -1.844,
                  "y": 297.096
                },
                {
                  "x": -3.375,
                  "y": 299.625
                },
                {
                  "x": -5.016,
                  "y": 302.044
                },
                {
                  "x": -6.683,
                  "y": 304.197
                },
                {
                  "x": -8.292,
                  "y": 305.928
                },
                {
                  "x": -9.759,
                  "y": 307.081
                },
                {
                  "x": -11.0,
                  "y": 307.5
                }
              ]
            }
          ]
        },
        {
          "type": "turn_right",
          "startRoad": "road_2_2_2",
          "endRoad": "road_1_2_1",
          "direction": 2,
          "laneLinks": [
            {
              "startLaneIndex": 2,
              "endLaneIndex": 0,
              "points": [
                {
                  "x": 11.0,
                  "y": 307.5
                },
                {
                  "x": 9.843,
                  "y": 307.499
                },
                {
                  "x": 8.604,
                  "y": 307.512
                },
                {
                  "x": 7.3309999999999995,
                  "y": 307.563
                },
                {
                  "x": 6.072,
                  "y": 307.676
                },
                {
                  "x": 4.875,
                  "y": 307.875
                },
                {
                  "x": 3.788,
                  "y": 308.18399999999997
                },
                {
                  "x": 2.859000000000001,
                  "y": 308.627
                },
                {
                  "x": 2.136000000000001,
                  "y": 309.228
                },
                {
                  "x": 1.6669999999999998,
                  "y": 310.011
                },
                {
                  "x": 1.5,
                  "y": 311.0
                }
              ]
            },
            {
              "startLaneIndex": 2,
              "endLaneIndex": 1,
              "points": [
                {
                  "x": 11.0,
                  "y": 307.5
                },
                {
                  "x": 9.927,
                  "y": 307.499
                },
                {
                  "x": 8.916,
                  "y": 307.512
                },
                {
                  "x": 7.979,
                  "y": 307.563
                },
                {
                  "x": 7.128,
                  "y": 307.676
                },
                {
                  "x": 6.375,
                  "y": 307.875
                },
                {
                  "x": 5.732,
                  "y": 308.18399999999997
                },
                {
                  "x": 5.211000000000001,
                  "y": 308.627
                },
                {
                  "x": 4.824000000000001,
                  "y": 309.228
                },
                {
                  "x": 4.583,
                  "y": 310.011
                },
                {
                  "x": 4.5,
                  "y": 311.0
                }
              ]
            },
            {
              "startLaneIndex": 2,
              "endLaneIndex": 2,
              "points": [
                {
                  "x": 11.0,
                  "y": 307.5
                },
                {
                  "x": 10.011,
                  "y": 307.499
                },
                {
                  "x": 9.228,
                  "y": 307.512
                },
                {
                  "x": 8.627,
                  "y": 307.563
                },
                {
                  "x": 8.184,
                  "y": 307.676
                },
                {
                  "x": 7.875,
                  "y": 307.875
                },
                {
                  "x": 7.676,
                  "y": 308.18399999999997
                },
                {
                  "x": 7.563000000000001,
                  "y": 308.627
                },
                {
                  "x": 7.512000000000001,
                  "y": 309.228
                },
                {
                  "x": 7.499,
                  "y": 310.011
                },
                {
                  "x": 7.5,
                  "y": 311.0
                }
              ]
            }
          ]
        },
        {
          "type": "go_straight",
          "startRoad": "road_2_2_2",
          "endRoad": "road_1_2_2",
          "direction": 2,
          "laneLinks": [
            {
              "startLaneIndex": 1,
              "endLaneIndex": 0,
              "points": [
                {
                  "x": 11.0,
                  "y": 304.5
                },
                {
                  "x": 9.592,
                  "y": 304.416
                },
                {
                  "x": 7.656,
                  "y": 304.188
                },
                {
                  "x": 5.324,
                  "y": 303.852
                },
                {
                  "x": 2.7279999999999998,
                  "y": 303.444
                },
                {
                  "x": 0.0,
                  "y": 303.0
                },
                {
                  "x": -2.7279999999999998,
                  "y": 302.556
                },
                {
                  "x": -5.323999999999999,
                  "y": 302.148
                },
                {
                  "x": -7.655999999999999,
                  "y": 301.812
                },
                {
                  "x": -9.592,
                  "y": 301.584
                },
                {
                  "x": -11.0,
                  "y": 301.5
                }
              ]
            },
            {
              "startLaneIndex": 1,
              "endLaneIndex": 1,
              "points": [
                {
                  "x": 11.0,
                  "y": 304.5
                },
                {
                  "x": 9.592,
                  "y": 304.5
                },
                {
                  "x": 7.656,
                  "y": 304.5
                },
                {
                  "x": 5.324,
                  "y": 304.5
                },
                {
                  "x": 2.7279999999999998,
                  "y": 304.5
                },
                {
                  "x": 0.0,
                  "y": 304.5
                },
                {
                  "x": -2.7279999999999998,
                  "y": 304.5
                },
                {
                  "x": -5.323999999999999,
                  "y": 304.5
                },
                {
                  "x": -7.655999999999999,
                  "y": 304.5
                },
                {
                  "x": -9.592,
                  "y": 304.5
                },
                {
                  "x": -11.0,
                  "y": 304.5
                }
              ]
            },
            {
              "startLaneIndex": 1,
              "endLaneIndex": 2,
              "points": [
                {
                  "x": 11.0,
                  "y": 304.5
                },
                {
                  "x": 9.592,
                  "y": 304.584
                },
                {
                  "x": 7.656,
                  "y": 304.812
                },
                {
                  "x": 5.324,
                  "y": 305.148
                },
                {
                  "x": 2.7279999999999998,
                  "y": 305.556
                },
                {
                  "x": 0.0,
                  "y": 306.0
                },
                {
                  "x": -2.7279999999999998,
                  "y": 306.444
                },
                {
                  "x": -5.323999999999999,
                  "y": 306.852
                },
                {
                  "x": -7.655999999999999,
                  "y": 307.188
                },
                {
                  "x": -9.592,
                  "y": 307.416
                },
                {
                  "x": -11.0,
                  "y": 307.5
                }
              ]
            }
          ]
        },
        {
          "type": "turn_left",
          "startRoad": "road_2_2_2",
          "endRoad": "road_1_2_3",
          "direction": 2,
          "laneLinks": [
            {
              "startLaneIndex": 0,
              "endLaneIndex": 0,
              "points": [
                {
                  "x": 11.0,
                  "y": 301.5
                },
                {
                  "x": 9.759,
                  "y": 301.249
                },
                {
                  "x": 8.292,
                  "y": 300.552
                },
                {
                  "x": 6.683,
                  "y": 299.493
                },
                {
                  "x": 5.016,
                  "y": 298.156
                },
                {
                  "x": 3.375,
                  "y": 296.625
                },
                {
                  "x": 1.844,
                  "y": 294.984
                },
                {
                  "x": 0.507000000000001,
                  "y": 293.317
                },
                {
                  "x": -0.551999999999999,
                  "y": 291.70799999999997
                },
                {
                  "x": -1.249,
                  "y": 290.241
                },
                {
                  "x": -1.5,
                  "y": 289.0
                }
              ]
            },
            {
              "startLaneIndex": 0,
              "endLaneIndex": 1,
              "points": [
                {
                  "x": 11.0,
                  "y": 301.5
                },
                {
                  "x": 9.675,
                  "y": 301.249
                },
                {
                  "x": 7.98,
                  "y": 300.552
                },
                {
                  "x": 6.035,
                  "y": 299.493
                },
                {
                  "x": 3.96,
                  "y": 298.156
                },
                {
                  "x": 1.875,
                  "y": 296.625
                },
                {
                  "x": -0.1,
                  "y": 294.984
                },
                {
                  "x": -1.844999999999999,
                  "y": 293.317
                },
                {
                  "x": -3.239999999999999,
                  "y": 291.70799999999997
                },
                {
                  "x": -4.165,
                  "y": 290.241
                },
                {
                  "x": -4.5,
                  "y": 289.0
                }
              ]
            },
            {
              "startLaneIndex": 0,
              "endLaneIndex": 2,
              "points": [
                {
                  "x": 11.0,
                  "y": 301.5
                },
                {
                  "x": 9.591,
                  "y": 301.249
                },
                {
                  "x": 7.668,
                  "y": 300.552
                },
                {
                  "x": 5.387,
                  "y": 299.493
                },
                {
                  "x": 2.904,
                  "y": 298.156
                },
                {
                  "x": 0.375,
                  "y": 296.625
                },
                {
                  "x": -2.044,
                  "y": 294.984
                },
                {
                  "x": -4.196999999999999,
                  "y": 293.317
                },
                {
                  "x": -5.927999999999999,
                  "y": 291.70799999999997
                },
                {
                  "x": -7.081,
                  "y": 290.241
                },
                {
                  "x": -7.5,
                  "y": 289.0
                }
              ]
            }
          ]
        },
        {
          "type": "turn_left",
          "startRoad": "road_1_3_3",
          "endRoad": "road_1_2_0",
          "direction": 3,
          "laneLinks": [
            {
              "startLaneIndex": 0,
              "endLaneIndex": 0,
              "points": [
                {
                  "x": -1.5,
                  "y": 311.0
                },
                {
                  "x": -1.249,
                  "y": 309.759
                },
                {
                  "x": -0.552,
                  "y": 308.292
                },
                {
                  "x": 0.507,
                  "y": 306.683
                },
                {
                  "x": 1.844,
                  "y": 305.016
                },
                {
                  "x": 3.375,
                  "y": 303.375
                },
                {
                  "x": 5.016,
                  "y": 301.844
                },
                {
                  "x": 6.683,
                  "y": 300.507
                },
                {
                  "x": 8.292,
                  "y": 299.448
                },
                {
                  "x": 9.759,
                  "y": 298.75100000000003
                },
                {
                  "x": 11.0,
                  "y": 298.5
                }
              ]
            },
            {
              "startLaneIndex": 0,
              "endLaneIndex": 1,
              "points": [
                {
                  "x": -1.5,
                  "y": 311.0
                },
                {
                  "x": -1.249,
                  "y": 309.675
                },
                {
                  "x": -0.552,
                  "y": 307.98
                },
                {
                  "x": 0.507,
                  "y": 306.03499999999997
                },
                {
                  "x": 1.844,
                  "y": 303.96
                },
                {
                  "x": 3.375,
                  "y": 301.875
                },
                {
                  "x": 5.016,
                  "y": 299.9
                },
                {
                  "x": 6.683,
                  "y": 298.155
                },
                {
                  "x": 8.292,
                  "y": 296.76
                },
                {
                  "x": 9.759,
                  "y": 295.83500000000004
                },
                {
                  "x": 11.0,
                  "y": 295.5
                }
              ]
            },
            {
              "startLaneIndex": 0,
              "endLaneIndex": 2,
              "points": [
                {
                  "x": -1.5,
                  "y": 311.0
                },
                {
                  "x": -1.249,
                  "y": 309.591
                },
                {
                  "x": -0.552,
                  "y": 307.668
                },
                {
                  "x": 0.507,
                  "y": 305.387
                },
                {
                  "x": 1.844,
                  "y": 302.904
                },
                {
                  "x": 3.375,
                  "y": 300.375
                },
                {
                  "x": 5.016,
                  "y": 297.956
                },
                {
                  "x": 6.683,
                  "y": 295.803
                },
                {
                  "x": 8.292,
                  "y": 294.072
                },
                {
                  "x": 9.759,
                  "y": 292.919
                },
                {
                  "x": 11.0,
                  "y": 292.5
                }
              ]
            }
          ]
        },
        {
          "type": "turn_right",
          "startRoad": "road_1_3_3",
          "endRoad": "road_1_2_2",
          "direction": 3,
          "laneLinks": [
            {
              "startLaneIndex": 2,
              "endLaneIndex": 0,
              "points": [
                {
                  "x": -7.5,
                  "y": 311.0
                },
                {
                  "x": -7.499,
                  "y": 309.843
                },
                {
                  "x": -7.512,
                  "y": 308.604
                },
                {
                  "x": -7.563,
                  "y": 307.331
                },
                {
                  "x": -7.676,
                  "y": 306.072
                },
                {
                  "x": -7.875,
                  "y": 304.875
                },
                {
                  "x": -8.184,
                  "y": 303.788
                },
                {
                  "x": -8.627,
                  "y": 302.859
                },
                {
                  "x": -9.228,
                  "y": 302.136
                },
                {
                  "x": -10.011,
                  "y": 301.66700000000003
                },
                {
                  "x": -11.0,
                  "y": 301.5
                }
              ]
            },
            {
              "startLaneIndex": 2,
              "endLaneIndex": 1,
              "points": [
                {
                  "x": -7.5,
                  "y": 311.0
                },
                {
                  "x": -7.499,
                  "y": 309.927
                },
                {
                  "x": -7.512,
                  "y": 308.916
                },
                {
                  "x": -7.563,
                  "y": 307.979
                },
                {
                  "x": -7.676,
                  "y": 307.128
                },
                {
                  "x": -7.875,
                  "y": 306.375
                },
                {
                  "x": -8.184,
                  "y": 305.73199999999997
                },
                {
                  "x": -8.627,
                  "y": 305.211
                },
                {
                  "x": -9.228,
                  "y": 304.824
                },
                {
                  "x": -10.011,
                  "y": 304.583
                },
                {
                  "x": -11.0,
                  "y": 304.5
                }
              ]
            },
            {
              "startLaneIndex": 2,
              "endLaneIndex": 2,
              "points": [
                {
                  "x": -7.5,
                  "y": 311.0
                },
                {
                  "x": -7.499,
                  "y": 310.011
                },
                {
                  "x": -7.512,
                  "y": 309.228
                },
                {
                  "x": -7.563,
                  "y": 308.627
                },
                {
                  "x": -7.676,
                  "y": 308.18399999999997
                },
                {
                  "x": -7.875,
                  "y": 307.875
                },
                {
                  "x": -8.184,
                  "y": 307.676
                },
                {
                  "x": -8.627,
                  "y": 307.563
                },
                {
                  "x": -9.228,
                  "y": 307.512
                },
                {
                  "x": -10.011,
                  "y": 307.499
                },
                {
                  "x": -11.0,
                  "y": 307.5
                }
              ]
            }
          ]
        },
        {
          "type": "go_straight",
          "startRoad": "road_1_3_3",
          "endRoad": "road_1_2_3",
          "direction": 3,
          "laneLinks": [
            {
              "startLaneIndex": 1,
              "endLaneIndex": 0,
              "points": [
                {
                  "x": -4.5,
                  "y": 311.0
                },
                {
                  "x": -4.416,
                  "y": 309.592
                },
                {
                  "x": -4.188,
                  "y": 307.656
                },
                {
                  "x": -3.852,
                  "y": 305.324
                },
                {
                  "x": -3.444,
                  "y": 302.728
                },
                {
                  "x": -3.0,
                  "y": 300.0
                },
                {
                  "x": -2.556,
                  "y": 297.272
                },
                {
                  "x": -2.148,
                  "y": 294.676
                },
                {
                  "x": -1.811999999999999,
                  "y": 292.344
                },
                {
                  "x": -1.584,
                  "y": 290.408
                },
                {
                  "x": -1.5,
                  "y": 289.0
                }
              ]
            },
            {
              "startLaneIndex": 1,
              "endLaneIndex": 1,
              "points": [
                {
                  "x": -4.5,
                  "y": 311.0
                },
                {
                  "x": -4.5,
                  "y": 309.592
                },
                {
                  "x": -4.5,
                  "y": 307.656
                },
                {
                  "x": -4.5,
                  "y": 305.324
                },
                {
                  "x": -4.5,
                  "y": 302.728
                },
                {
                  "x": -4.5,
                  "y": 300.0
                },
                {
                  "x": -4.5,
                  "y": 297.272
                },
                {
                  "x": -4.5,
                  "y": 294.676
                },
                {
                  "x": -4.499999999999999,
                  "y": 292.344
                },
                {
                  "x": -4.5,
                  "y": 290.408
                },
                {
                  "x": -4.5,
                  "y": 289.0
                }
              ]
            },
            {
              "startLaneIndex": 1,
              "endLaneIndex": 2,
              "points": [
                {
                  "x": -4.5,
                  "y": 311.0
                },
                {
                  "x": -4.584,
                  "y": 309.592
                },
                {
                  "x": -4.812,
                  "y": 307.656
                },
                {
                  "x": -5.148,
                  "y": 305.324
                },
                {
                  "x": -5.556,
                  "y": 302.728
                },
                {
                  "x": -6.0,
                  "y": 300.0
                },
                {
                  "x": -6.444,
                  "y": 297.272
                },
                {
                  "x": -6.852,
                  "y": 294.676
                },
                {
                  "x": -7.187999999999999,
                  "y": 292.344
                },
                {
                  "x": -7.416,
                  "y": 290.408
                },
                {
                  "x": -7.5,
                  "y": 289.0
                }
              ]
            }
          ]
        }
      ],
      "trafficLight": {
        "roadLinkIndices": [
          0,
          1,
          2,
          3,
          4,
          5,
          6,
          7,
          8,
          9,
          10,
          11
        ],
        "lightphases": [
          {
            "time": 5,
            "availableRoadLinks": [
              10,
              2,
              3,
              6
            ]
          },
          {
            "time": 30,
            "availableRoadLinks": [
              0,
              2,
              3,
              6,
              7,
              10
            ]
          },
          {
            "time": 30,
            "availableRoadLinks": [
              2,
              3,
              4,
              6,
              10,
              11
            ]
          },
          {
            "time": 30,
            "availableRoadLinks": [
              1,
              2,
              3,
              6,
              8,
              10
            ]
          },
          {
            "time": 30,
            "availableRoadLinks": [
              2,
              3,
              5,
              6,
              9,
              10
            ]
          },
          {
            "time": 30,
            "availableRoadLinks": [
              0,
              1,
              2,
              3,
              6,
              10
            ]
          },
          {
            "time": 30,
            "availableRoadLinks": [
              2,
              3,
              6,
              7,
              8,
              10
            ]
          },
          {
            "time": 30,
            "availableRoadLinks": [
              2,
              3,
              4,
              5,
              6,
              10
            ]
          },
          {
            "time": 30,
            "availableRoadLinks": [
              2,
              3,
              6,
              9,
              10,
              11
            ]
          }
        ]
      },
      "virtual": false
    },
    {
      "id": "intersection_1_3",
      "point": {
        "x": 0,
        "y": 600
      },
      "width": 11,
      "roads": [
        "road_0_3_0",
        "road_1_2_1",
        "road_2_3_2",
        "road_1_4_3",
        "road_1_3_0",
        "road_1_3_1",
        "road_1_3_2",
        "road_1_3_3"
      ],
      "roadLinks": [
        {
          "type": "go_straight",
          "startRoad": "road_0_3_0",
          "endRoad": "road_1_3_0",
          "direction": 0,
          "laneLinks": [
            {
              "startLaneIndex": 1,
              "endLaneIndex": 0,
              "points": [
                {
                  "x": -11.0,
                  "y": 595.5
                },
                {
                  "x": -9.592,
                  "y": 595.584
                },
                {
                  "x": -7.656,
                  "y": 595.812
                },
                {
                  "x": -5.324,
                  "y": 596.148
                },
                {
                  "x": -2.7279999999999998,
                  "y": 596.556
                },
                {
                  "x": 0.0,
                  "y": 597.0
                },
                {
                  "x": 2.7279999999999998,
                  "y": 597.444
                },
                {
                  "x": 5.323999999999999,
                  "y": 597.852
                },
                {
                  "x": 7.655999999999999,
                  "y": 598.1879999999999
                },
                {
                  "x": 9.592,
                  "y": 598.4159999999999
                },
                {
                  "x": 11.0,
                  "y": 598.5
                }
              ]
            },
            {
              "startLaneIndex": 1,
              "endLaneIndex": 1,
              "points": [
                {
                  "x": -11.0,
                  "y": 595.5
                },
                {
                  "x": -9.592,
                  "y": 595.5
                },
                {
                  "x": -7.656,
                  "y": 595.5
                },
                {
                  "x": -5.324,
                  "y": 595.5
                },
                {
                  "x": -2.7279999999999998,
                  "y": 595.5
                },
                {
                  "x": 0.0,
                  "y": 595.5
                },
                {
                  "x": 2.7279999999999998,
                  "y": 595.5
                },
                {
                  "x": 5.323999999999999,
                  "y": 595.5
                },
                {
                  "x": 7.655999999999999,
                  "y": 595.4999999999999
                },
                {
                  "x": 9.592,
                  "y": 595.5
                },
                {
                  "x": 11.0,
                  "y": 595.5
                }
              ]
            },
            {
              "startLaneIndex": 1,
              "endLaneIndex": 2,
              "points": [
                {
                  "x": -11.0,
                  "y": 595.5
                },
                {
                  "x": -9.592,
                  "y": 595.4159999999999
                },
                {
                  "x": -7.656,
                  "y": 595.188
                },
                {
                  "x": -5.324,
                  "y": 594.852
                },
                {
                  "x": -2.7279999999999998,
                  "y": 594.444
                },
                {
                  "x": 0.0,
                  "y": 594.0
                },
                {
                  "x": 2.7279999999999998,
                  "y": 593.556
                },
                {
                  "x": 5.323999999999999,
                  "y": 593.148
                },
                {
                  "x": 7.655999999999999,
                  "y": 592.8119999999999
                },
                {
                  "x": 9.592,
                  "y": 592.584
                },
                {
                  "x": 11.0,
                  "y": 592.5
                }
              ]
            }
          ]
        },
        {
          "type": "turn_left",
          "startRoad": "road_0_3_0",
          "endRoad": "road_1_3_1",
          "direction": 0,
          "laneLinks": [
            {
              "startLaneIndex": 0,
              "endLaneIndex": 0,
              "points": [
                {
                  "x": -11.0,
                  "y": 598.5
                },
                {
                  "x": -9.759,
                  "y": 598.751
                },
                {
                  "x": -8.292,
                  "y": 599.448
                },
                {
                  "x": -6.683,
                  "y": 600.507
                },
                {
                  "x": -5.016,
                  "y": 601.844
                },
                {
                  "x": -3.375,
                  "y": 603.375
                },
                {
                  "x": -1.844,
                  "y": 605.016
                },
                {
                  "x": -0.507000000000001,
                  "y": 606.683
                },
                {
                  "x": 0.551999999999999,
                  "y": 608.2919999999999
                },
                {
                  "x": 1.249,
                  "y": 609.759
                },
                {
                  "x": 1.5,
                  "y": 611.0
                }
              ]
            },
            {
              "startLaneIndex": 0,
              "endLaneIndex": 1,
              "points": [
                {
                  "x": -11.0,
                  "y": 598.5
                },
                {
                  "x": -9.675,
                  "y": 598.751
                },
                {
                  "x": -7.98,
                  "y": 599.448
                },
                {
                  "x": -6.035,
                  "y": 600.507
                },
                {
                  "x": -3.96,
                  "y": 601.844
                },
                {
                  "x": -1.875,
                  "y": 603.375
                },
                {
                  "x": 0.1,
                  "y": 605.016
                },
                {
                  "x": 1.844999999999999,
                  "y": 606.683
                },
                {
                  "x": 3.239999999999999,
                  "y": 608.2919999999999
                },
                {
                  "x": 4.165,
                  "y": 609.759
                },
                {
                  "x": 4.5,
                  "y": 611.0
                }
              ]
            },
            {
              "startLaneIndex": 0,
              "endLaneIndex": 2,
              "points": [
                {
                  "x": -11.0,
                  "y": 598.5
                },
                {
                  "x": -9.591,
                  "y": 598.751
                },
                {
                  "x": -7.668,
                  "y": 599.448
                },
                {
                  "x": -5.387,
                  "y": 600.507
                },
                {
                  "x": -2.904,
                  "y": 601.844
                },
                {
                  "x": -0.375,
                  "y": 603.375
                },
                {
                  "x": 2.044,
                  "y": 605.016
                },
                {
                  "x": 4.196999999999999,
                  "y": 606.683
                },
                {
                  "x": 5.927999999999999,
                  "y": 608.2919999999999
                },
                {
                  "x": 7.081,
                  "y": 609.759
                },
                {
                  "x": 7.5,
                  "y": 611.0
                }
              ]
            }
          ]
        },
        {
          "type": "turn_right",
          "startRoad": "road_0_3_0",
          "endRoad": "road_1_3_3",
          "direction": 0,
          "laneLinks": [
            {
              "startLaneIndex": 2,
              "endLaneIndex": 0,
              "points": [
                {
                  "x": -11.0,
                  "y": 592.5
                },
                {
                  "x": -9.843,
                  "y": 592.501
                },
                {
                  "x": -8.604,
                  "y": 592.488
                },
                {
                  "x": -7.3309999999999995,
                  "y": 592.437
                },
                {
                  "x": -6.072,
                  "y": 592.324
                },
                {
                  "x": -4.875,
                  "y": 592.125
                },
                {
                  "x": -3.788,
                  "y": 591.816
                },
                {
                  "x": -2.859000000000001,
                  "y": 591.373
                },
                {
                  "x": -2.136000000000001,
                  "y": 590.7719999999999
                },
                {
                  "x": -1.6669999999999998,
                  "y": 589.989
                },
                {
                  "x": -1.5,
                  "y": 589.0
                }
              ]
            },
            {
              "startLaneIndex": 2,
              "endLaneIndex": 1,
              "points": [
                {
                  "x": -11.0,
                  "y": 592.5
                },
                {
                  "x": -9.927,
                  "y": 592.501
                },
                {
                  "x": -8.916,
                  "y": 592.488
                },
                {
                  "x": -7.979,
                  "y": 592.437
                },
                {
                  "x": -7.128,
                  "y": 592.324
                },
                {
                  "x": -6.375,
                  "y": 592.125
                },
                {
                  "x": -5.732,
                  "y": 591.816
                },
                {
                  "x": -5.211000000000001,
                  "y": 591.373
                },
                {
                  "x": -4.824000000000001,
                  "y": 590.7719999999999
                },
                {
                  "x": -4.583,
                  "y": 589.989
                },
                {
                  "x": -4.5,
                  "y": 589.0
                }
              ]
            },
            {
              "startLaneIndex": 2,
              "endLaneIndex": 2,
              "points": [
                {
                  "x": -11.0,
                  "y": 592.5
                },
                {
                  "x": -10.011,
                  "y": 592.501
                },
                {
                  "x": -9.228,
                  "y": 592.488
                },
                {
                  "x": -8.627,
                  "y": 592.437
                },
                {
                  "x": -8.184,
                  "y": 592.324
                },
                {
                  "x": -7.875,
                  "y": 592.125
                },
                {
                  "x": -7.676,
                  "y": 591.816
                },
                {
                  "x": -7.563000000000001,
                  "y": 591.373
                },
                {
                  "x": -7.512000000000001,
                  "y": 590.7719999999999
                },
                {
                  "x": -7.499,
                  "y": 589.989
                },
                {
                  "x": -7.5,
                  "y": 589.0
                }
              ]
            }
          ]
        },
        {
          "type": "turn_right",
          "startRoad": "road_1_2_1",
          "endRoad": "road_1_3_0",
          "direction": 1,
          "laneLinks": [
            {
              "startLaneIndex": 2,
              "endLaneIndex": 0,
              "points": [
                {
                  "x": 7.5,
                  "y": 589.0
                },
                {
                  "x": 7.499,
                  "y": 590.157
                },
                {
                  "x": 7.512,
                  "y": 591.396
                },
                {
                  "x": 7.563,
                  "y": 592.669
                },
                {
                  "x": 7.676,
                  "y": 593.928
                },
                {
                  "x": 7.875,
                  "y": 595.125
                },
                {
                  "x": 8.184,
                  "y": 596.212
                },
                {
                  "x": 8.627,
                  "y": 597.141
                },
                {
                  "x": 9.228,
                  "y": 597.8639999999999
                },
                {
                  "x": 10.011,
                  "y": 598.333
                },
                {
                  "x": 11.0,
                  "y": 598.5
                }
              ]
            },
            {
              "startLaneIndex": 2,
              "endLaneIndex": 1,
              "points": [
                {
                  "x": 7.5,
                  "y": 589.0
                },
                {
                  "x": 7.499,
                  "y": 590.073
                },
                {
                  "x": 7.512,
                  "y": 591.084
                },
                {
                  "x": 7.563,
                  "y": 592.021
                },
                {
                  "x": 7.676,
                  "y": 592.872
                },
                {
                  "x": 7.875,
                  "y": 593.625
                },
                {
                  "x": 8.184,
                  "y": 594.268
                },
                {
                  "x": 8.627,
                  "y": 594.789
                },
                {
                  "x": 9.228,
                  "y": 595.1759999999999
                },
                {
                  "x": 10.011,
                  "y": 595.417
                },
                {
                  "x": 11.0,
                  "y": 595.5
                }
              ]
            },
            {
              "startLaneIndex": 2,
              "endLaneIndex": 2,
              "points": [
                {
                  "x": 7.5,
                  "y": 589.0
                },
                {
                  "x": 7.499,
                  "y": 589.989
                },
                {
                  "x": 7.512,
                  "y": 590.772
                },
                {
                  "x": 7.563,
                  "y": 591.373
                },
                {
                  "x": 7.676,
                  "y": 591.816
                },
                {
                  "x": 7.875,
                  "y": 592.125
                },
                {
                  "x": 8.184,
                  "y": 592.324
                },
                {
                  "x": 8.627,
                  "y": 592.437
                },
                {
                  "x": 9.228,
                  "y": 592.4879999999999
                },
                {
                  "x": 10.011,
                  "y": 592.501
                },
                {
                  "x": 11.0,
                  "y": 592.5
                }
              ]
            }
          ]
        },
        {
          "type": "go_straight",
          "startRoad": "road_1_2_1",
          "endRoad": "road_1_3_1",
          "direction": 1,
          "laneLinks": [
            {
              "startLaneIndex": 1,
              "endLaneIndex": 0,
              "points": [
                {
                  "x": 4.5,
                  "y": 589.0
                },
                {
                  "x": 4.416,
                  "y": 590.408
                },
                {
                  "x": 4.188,
                  "y": 592.344
                },
                {
                  "x": 3.852,
                  "y": 594.676
                },
                {
                  "x": 3.444,
                  "y": 597.272
                },
                {
                  "x": 3.0,
                  "y": 600.0
                },
                {
                  "x": 2.556,
                  "y": 602.728
                },
                {
                  "x": 2.148,
                  "y": 605.324
                },
                {
                  "x": 1.811999999999999,
                  "y": 607.656
                },
                {
                  "x": 1.584,
                  "y": 609.592
                },
                {
                  "x": 1.5,
                  "y": 611.0
                }
              ]
            },
            {
              "startLaneIndex": 1,
              "endLaneIndex": 1,
              "points": [
                {
                  "x": 4.5,
                  "y": 589.0
                },
                {
                  "x": 4.5,
                  "y": 590.408
                },
                {
                  "x": 4.5,
                  "y": 592.344
                },
                {
                  "x": 4.5,
                  "y": 594.676
                },
                {
                  "x": 4.5,
                  "y": 597.272
                },
                {
                  "x": 4.5,
                  "y": 600.0
                },
                {
                  "x": 4.5,
                  "y": 602.728
                },
                {
                  "x": 4.5,
                  "y": 605.324
                },
                {
                  "x": 4.499999999999999,
                  "y": 607.656
                },
                {
                  "x": 4.5,
                  "y": 609.592
                },
                {
                  "x": 4.5,
                  "y": 611.0
                }
              ]
            },
            {
              "startLaneIndex": 1,
              "endLaneIndex": 2,
              "points": [
                {
                  "x": 4.5,
                  "y": 589.0
                },
                {
                  "x": 4.584,
                  "y": 590.408
                },
                {
                  "x": 4.812,
                  "y": 592.344
                },
                {
                  "x": 5.148,
                  "y": 594.676
                },
                {
                  "x": 5.556,
                  "y": 597.272
                },
                {
                  "x": 6.0,
                  "y": 600.0
                },
                {
                  "x": 6.444,
                  "y": 602.728
                },
                {
                  "x": 6.852,
                  "y": 605.324
                },
                {
                  "x": 7.187999999999999,
                  "y": 607.656
                },
                {
                  "x": 7.416,
                  "y": 609.592
                },
                {
                  "x": 7.5,
                  "y": 611.0
                }
              ]
            }
          ]
        },
        {
          "type": "turn_left",
          "startRoad": "road_1_2_1",
          "endRoad": "road_1_3_2",
          "direction": 1,
          "laneLinks": [
            {
              "startLaneIndex": 0,
              "endLaneIndex": 0,
              "points": [
                {
                  "x": 1.5,
                  "y": 589.0
                },
                {
                  "x": 1.249,
                  "y": 590.241
                },
                {
                  "x": 0.552,
                  "y": 591.708
                },
                {
                  "x": -0.507,
                  "y": 593.317
                },
                {
                  "x": -1.844,
                  "y": 594.984
                },
                {
                  "x": -3.375,
                  "y": 596.625
                },
                {
                  "x": -5.016,
                  "y": 598.156
                },
                {
                  "x": -6.683,
                  "y": 599.4929999999999
                },
                {
                  "x": -8.292,
                  "y": 600.5519999999999
                },
                {
                  "x": -9.759,
                  "y": 601.249
                },
                {
                  "x": -11.0,
                  "y": 601.5
                }
              ]
            },
            {
              "startLaneIndex": 0,
              "endLaneIndex": 1,
              "points": [
                {
                  "x": 1.5,
                  "y": 589.0
                },
                {
                  "x": 1.249,
                  "y": 590.325
                },
                {
                  "x": 0.552,
                  "y": 592.02
                },
                {
                  "x": -0.507,
                  "y": 593.965
                },
                {
                  "x": -1.844,
                  "y": 596.04
                },
                {
                  "x": -3.375,
                  "y": 598.125
                },
                {
                  "x": -5.016,
                  "y": 600.1
                },
                {
                  "x": -6.683,
                  "y": 601.845
                },
                {
                  "x": -8.292,
                  "y": 603.2399999999999
                },
                {
                  "x": -9.759,
                  "y": 604.165
                },
                {
                  "x": -11.0,
                  "y": 604.5
                }
              ]
            },
            {
              "startLaneIndex": 0,
              "endLaneIndex": 2,
              "points": [
                {
                  "x": 1.5,
                  "y": 589.0
                },
                {
                  "x": 1.249,
                  "y": 590.409
                },
                {
                  "x": 0.552,
                  "y": 592.332
                },
                {
                  "x": -0.507,
                  "y": 594.613
                },
                {
                  "x": -1.844,
                  "y": 597.096
                },
                {
                  "x": -3.375,
                  "y": 599.625
                },
                {
                  "x": -5.016,
                  "y": 602.044
                },
                {
                  "x": -6.683,
                  "y": 604.197
                },
                {
                  "x": -8.292,
                  "y": 605.9279999999999
                },
                {
                  "x": -9.759,
                  "y": 607.081
                },
                {
                  "x": -11.0,
                  "y": 607.5
                }
              ]
            }
          ]
        },
        {
          "type": "turn_right",
          "startRoad": "road_2_3_2",
          "endRoad": "road_1_3_1",
          "direction": 2,
          "laneLinks": [
            {
              "startLaneIndex": 2,
              "endLaneIndex": 0,
              "points": [
                {
                  "x": 11.0,
                  "y": 607.5
                },
                {
                  "x": 9.843,
                  "y": 607.499
                },
                {
                  "x": 8.604,
                  "y": 607.512
                },
                {
                  "x": 7.3309999999999995,
                  "y": 607.563
                },
                {
                  "x": 6.072,
                  "y": 607.676
                },
                {
                  "x": 4.875,
                  "y": 607.875
                },
                {
                  "x": 3.788,
                  "y": 608.184
                },
                {
                  "x": 2.859000000000001,
                  "y": 608.627
                },
                {
                  "x": 2.136000000000001,
                  "y": 609.2279999999998
                },
                {
                  "x": 1.6669999999999998,
                  "y": 610.011
                },
                {
                  "x": 1.5,
                  "y": 611.0
                }
              ]
            },
            {
              "startLaneIndex": 2,
              "endLaneIndex": 1,
              "points": [
                {
                  "x": 11.0,
                  "y": 607.5
                },
                {
                  "x": 9.927,
                  "y": 607.499
                },
                {
                  "x": 8.916,
                  "y": 607.512
                },
                {
                  "x": 7.979,
                  "y": 607.563
                },
                {
                  "x": 7.128,
                  "y": 607.676
                },
                {
                  "x": 6.375,
                  "y": 607.875
                },
                {
                  "x": 5.732,
                  "y": 608.184
                },
                {
                  "x": 5.211000000000001,
                  "y": 608.627
                },
                {
                  "x": 4.824000000000001,
                  "y": 609.2279999999998
                },
                {
                  "x": 4.583,
                  "y": 610.011
                },
                {
                  "x": 4.5,
                  "y": 611.0
                }
              ]
            },
            {
              "startLaneIndex": 2,
              "endLaneIndex": 2,
              "points": [
                {
                  "x": 11.0,
                  "y": 607.5
                },
                {
                  "x": 10.011,
                  "y": 607.499
                },
                {
                  "x": 9.228,
                  "y": 607.512
                },
                {
                  "x": 8.627,
                  "y": 607.563
                },
                {
                  "x": 8.184,
                  "y": 607.676
                },
                {
                  "x": 7.875,
                  "y": 607.875
                },
                {
                  "x": 7.676,
                  "y": 608.184
                },
                {
                  "x": 7.563000000000001,
                  "y": 608.627
                },
                {
                  "x": 7.512000000000001,
                  "y": 609.2279999999998
                },
                {
                  "x": 7.499,
                  "y": 610.011
                },
                {
                  "x": 7.5,
                  "y": 611.0
                }
              ]
            }
          ]
        },
        {
          "type": "go_straight",
          "startRoad": "road_2_3_2",
          "endRoad": "road_1_3_2",
          "direction": 2,
          "laneLinks": [
            {
              "startLaneIndex": 1,
              "endLaneIndex": 0,
              "points": [
                {
                  "x": 11.0,
                  "y": 604.5
                },
                {
                  "x": 9.592,
                  "y": 604.4159999999999
                },
                {
                  "x": 7.656,
                  "y": 604.188
                },
                {
                  "x": 5.324,
                  "y": 603.852
                },
                {
                  "x": 2.7279999999999998,
                  "y": 603.444
                },
                {
                  "x": 0.0,
                  "y": 603.0
                },
                {
                  "x": -2.7279999999999998,
                  "y": 602.556
                },
                {
                  "x": -5.323999999999999,
                  "y": 602.148
                },
                {
                  "x": -7.655999999999999,
                  "y": 601.8119999999999
                },
                {
                  "x": -9.592,
                  "y": 601.584
                },
                {
                  "x": -11.0,
                  "y": 601.5
                }
              ]
            },
            {
              "startLaneIndex": 1,
              "endLaneIndex": 1,
              "points": [
                {
                  "x": 11.0,
                  "y": 604.5
                },
                {
                  "x": 9.592,
                  "y": 604.5
                },
                {
                  "x": 7.656,
                  "y": 604.5
                },
                {
                  "x": 5.324,
                  "y": 604.5
                },
                {
                  "x": 2.7279999999999998,
                  "y": 604.5
                },
                {
                  "x": 0.0,
                  "y": 604.5
                },
                {
                  "x": -2.7279999999999998,
                  "y": 604.5
                },
                {
                  "x": -5.323999999999999,
                  "y": 604.5
                },
                {
                  "x": -7.655999999999999,
                  "y": 604.4999999999999
                },
                {
                  "x": -9.592,
                  "y": 604.5
                },
                {
                  "x": -11.0,
                  "y": 604.5
                }
              ]
            },
            {
              "startLaneIndex": 1,
              "endLaneIndex": 2,
              "points": [
                {
                  "x": 11.0,
                  "y": 604.5
                },
                {
                  "x": 9.592,
                  "y": 604.584
                },
                {
                  "x": 7.656,
                  "y": 604.812
                },
                {
                  "x": 5.324,
                  "y": 605.148
                },
                {
                  "x": 2.7279999999999998,
                  "y": 605.556
                },
                {
                  "x": 0.0,
                  "y": 606.0
                },
                {
                  "x": -2.7279999999999998,
                  "y": 606.444
                },
                {
                  "x": -5.323999999999999,
                  "y": 606.852
                },
                {
                  "x": -7.655999999999999,
                  "y": 607.1879999999999
                },
                {
                  "x": -9.592,
                  "y": 607.4159999999999
                },
                {
                  "x": -11.0,
                  "y": 607.5
                }
              ]
            }
          ]
        },
        {
          "type": "turn_left",
          "startRoad": "road_2_3_2",
          "endRoad": "road_1_3_3",
          "direction": 2,
          "laneLinks": [
            {
              "startLaneIndex": 0,
              "endLaneIndex": 0,
              "points": [
                {
                  "x": 11.0,
                  "y": 601.5
                },
                {
                  "x": 9.759,
                  "y": 601.249
                },
                {
                  "x": 8.292,
                  "y": 600.552
                },
                {
                  "x": 6.683,
                  "y": 599.4929999999999
                },
                {
                  "x": 5.016,
                  "y": 598.156
                },
                {
                  "x": 3.375,
                  "y": 596.625
                },
                {
                  "x": 1.844,
                  "y": 594.984
                },
                {
                  "x": 0.507000000000001,
                  "y": 593.317
                },
                {
                  "x": -0.551999999999999,
                  "y": 591.7079999999999
                },
                {
                  "x": -1.249,
                  "y": 590.241
                },
                {
                  "x": -1.5,
                  "y": 589.0
                }
              ]
            },
            {
              "startLaneIndex": 0,
              "endLaneIndex": 1,
              "points": [
                {
                  "x": 11.0,
                  "y": 601.5
                },
                {
                  "x": 9.675,
                  "y": 601.249
                },
                {
                  "x": 7.98,
                  "y": 600.552
                },
                {
                  "x": 6.035,
                  "y": 599.4929999999999
                },
                {
                  "x": 3.96,
                  "y": 598.156
                },
                {
                  "x": 1.875,
                  "y": 596.625
                },
                {
                  "x": -0.1,
                  "y": 594.984
                },
                {
                  "x": -1.844999999999999,
                  "y": 593.317
                },
                {
                  "x": -3.239999999999999,
                  "y": 591.7079999999999
                },
                {
                  "x": -4.165,
                  "y": 590.241
                },
                {
                  "x": -4.5,
                  "y": 589.0
                }
              ]
            },
            {
              "startLaneIndex": 0,
              "endLaneIndex": 2,
              "points": [
                {
                  "x": 11.0,
                  "y": 601.5
                },
                {
                  "x": 9.591,
                  "y": 601.249
                },
                {
                  "x": 7.668,
                  "y": 600.552
                },
                {
                  "x": 5.387,
                  "y": 599.4929999999999
                },
                {
                  "x": 2.904,
                  "y": 598.156
                },
                {
                  "x": 0.375,
                  "y": 596.625
                },
                {
                  "x": -2.044,
                  "y": 594.984
                },
                {
                  "x": -4.196999999999999,
                  "y": 593.317
                },
                {
                  "x": -5.927999999999999,
                  "y": 591.7079999999999
                },
                {
                  "x": -7.081,
                  "y": 590.241
                },
                {
                  "x": -7.5,
                  "y": 589.0
                }
              ]
            }
          ]
        },
        {
          "type": "turn_left",
          "startRoad": "road_1_4_3",
          "endRoad": "road_1_3_0",
          "direction": 3,
          "laneLinks": [
            {
              "startLaneIndex": 0,
              "endLaneIndex": 0,
              "points": [
                {
                  "x": -1.5,
                  "y": 611.0
                },
                {
                  "x": -1.249,
                  "y": 609.759
                },
                {
                  "x": -0.552,
                  "y": 608.292
                },
                {
                  "x": 0.507,
                  "y": 606.683
                },
                {
                  "x": 1.844,
                  "y": 605.016
                },
                {
                  "x": 3.375,
                  "y": 603.375
                },
                {
                  "x": 5.016,
                  "y": 601.844
                },
                {
                  "x": 6.683,
                  "y": 600.507
                },
                {
                  "x": 8.292,
                  "y": 599.4479999999999
                },
                {
                  "x": 9.759,
                  "y": 598.751
                },
                {
                  "x": 11.0,
                  "y": 598.5
                }
              ]
            },
            {
              "startLaneIndex": 0,
              "endLaneIndex": 1,
              "points": [
                {
                  "x": -1.5,
                  "y": 611.0
                },
                {
                  "x": -1.249,
                  "y": 609.675
                },
                {
                  "x": -0.552,
                  "y": 607.98
                },
                {
                  "x": 0.507,
                  "y": 606.035
                },
                {
                  "x": 1.844,
                  "y": 603.96
                },
                {
                  "x": 3.375,
                  "y": 601.875
                },
                {
                  "x": 5.016,
                  "y": 599.9
                },
                {
                  "x": 6.683,
                  "y": 598.155
                },
                {
                  "x": 8.292,
                  "y": 596.7599999999999
                },
                {
                  "x": 9.759,
                  "y": 595.835
                },
                {
                  "x": 11.0,
                  "y": 595.5
                }
              ]
            },
            {
              "startLaneIndex": 0,
              "endLaneIndex": 2,
              "points": [
                {
                  "x": -1.5,
                  "y": 611.0
                },
                {
                  "x": -1.249,
                  "y": 609.591
                },
                {
                  "x": -0.552,
                  "y": 607.668
                },
                {
                  "x": 0.507,
                  "y": 605.387
                },
                {
                  "x": 1.844,
                  "y": 602.904
                },
                {
                  "x": 3.375,
                  "y": 600.375
                },
                {
                  "x": 5.016,
                  "y": 597.956
                },
                {
                  "x": 6.683,
                  "y": 595.803
                },
                {
                  "x": 8.292,
                  "y": 594.0719999999999
                },
                {
                  "x": 9.759,
                  "y": 592.919
                },
                {
                  "x": 11.0,
                  "y": 592.5
                }
              ]
            }
          ]
        },
        {
          "type": "turn_right",
          "startRoad": "road_1_4_3",
          "endRoad": "road_1_3_2",
          "direction": 3,
          "laneLinks": [
            {
              "startLaneIndex": 2,
              "endLaneIndex": 0,
              "points": [
                {
                  "x": -7.5,
                  "y": 611.0
                },
                {
                  "x": -7.499,
                  "y": 609.843
                },
                {
                  "x": -7.512,
                  "y": 608.604
                },
                {
                  "x": -7.563,
                  "y": 607.331
                },
                {
                  "x": -7.676,
                  "y": 606.072
                },
                {
                  "x": -7.875,
                  "y": 604.875
                },
                {
                  "x": -8.184,
                  "y": 603.788
                },
                {
                  "x": -8.627,
                  "y": 602.859
                },
                {
                  "x": -9.228,
                  "y": 602.1359999999999
                },
                {
                  "x": -10.011,
                  "y": 601.667
                },
                {
                  "x": -11.0,
                  "y": 601.5
                }
              ]
            },
            {
              "startLaneIndex": 2,
              "endLaneIndex": 1,
              "points": [
                {
                  "x": -7.5,
                  "y": 611.0
                },
                {
                  "x": -7.499,
                  "y": 609.927
                },
                {
                  "x": -7.512,
                  "y": 608.9159999999999
                },
                {
                  "x": -7.563,
                  "y": 607.979
                },
                {
                  "x": -7.676,
                  "y": 607.128
                },
                {
                  "x": -7.875,
                  "y": 606.375
                },
                {
                  "x": -8.184,
                  "y": 605.732
                },
                {
                  "x": -8.627,
                  "y": 605.211
                },
                {
                  "x": -9.228,
                  "y": 604.8239999999998
                },
                {
                  "x": -10.011,
                  "y": 604.583
                },
                {
                  "x": -11.0,
                  "y": 604.5
                }
              ]
            },
            {
              "startLaneIndex": 2,
              "endLaneIndex": 2,
              "points": [
                {
                  "x": -7.5,
                  "y": 611.0
                },
                {
                  "x": -7.499,
                  "y": 610.011
                },
                {
                  "x": -7.512,
                  "y": 609.228
                },
                {
                  "x": -7.563,
                  "y": 608.627
                },
                {
                  "x": -7.676,
                  "y": 608.184
                },
                {
                  "x": -7.875,
                  "y": 607.875
                },
                {
                  "x": -8.184,
                  "y": 607.676
                },
                {
                  "x": -8.627,
                  "y": 607.563
                },
                {
                  "x": -9.228,
                  "y": 607.512
                },
                {
                  "x": -10.011,
                  "y": 607.499
                },
                {
                  "x": -11.0,
                  "y": 607.5
                }
              ]
            }
          ]
        },
        {
          "type": "go_straight",
          "startRoad": "road_1_4_3",
          "endRoad": "road_1_3_3",
          "direction": 3,
          "laneLinks": [
            {
              "startLaneIndex": 1,
              "endLaneIndex": 0,
              "points": [
                {
                  "x": -4.5,
                  "y": 611.0
                },
                {
                  "x": -4.416,
                  "y": 609.592
                },
                {
                  "x": -4.188,
                  "y": 607.656
                },
                {
                  "x": -3.852,
                  "y": 605.324
                },
                {
                  "x": -3.444,
                  "y": 602.728
                },
                {
                  "x": -3.0,
                  "y": 600.0
                },
                {
                  "x": -2.556,
                  "y": 597.272
                },
                {
                  "x": -2.148,
                  "y": 594.676
                },
                {
                  "x": -1.811999999999999,
                  "y": 592.3439999999999
                },
                {
                  "x": -1.584,
                  "y": 590.408
                },
                {
                  "x": -1.5,
                  "y": 589.0
                }
              ]
            },
            {
              "startLaneIndex": 1,
              "endLaneIndex": 1,
              "points": [
                {
                  "x": -4.5,
                  "y": 611.0
                },
                {
                  "x": -4.5,
                  "y": 609.592
                },
                {
                  "x": -4.5,
                  "y": 607.656
                },
                {
                  "x": -4.5,
                  "y": 605.324
                },
                {
                  "x": -4.5,
                  "y": 602.728
                },
                {
                  "x": -4.5,
                  "y": 600.0
                },
                {
                  "x": -4.5,
                  "y": 597.272
                },
                {
                  "x": -4.5,
                  "y": 594.676
                },
                {
                  "x": -4.499999999999999,
                  "y": 592.3439999999999
                },
                {
                  "x": -4.5,
                  "y": 590.408
                },
                {
                  "x": -4.5,
                  "y": 589.0
                }
              ]
            },
            {
              "startLaneIndex": 1,
              "endLaneIndex": 2,
              "points": [
                {
                  "x": -4.5,
                  "y": 611.0
                },
                {
                  "x": -4.584,
                  "y": 609.592
                },
                {
                  "x": -4.812,
                  "y": 607.656
                },
                {
                  "x": -5.148,
                  "y": 605.324
                },
                {
                  "x": -5.556,
                  "y": 602.728
                },
                {
                  "x": -6.0,
                  "y": 600.0
                },
                {
                  "x": -6.444,
                  "y": 597.272
                },
                {
                  "x": -6.852,
                  "y": 594.676
                },
                {
                  "x": -7.187999999999999,
                  "y": 592.3439999999999
                },
                {
                  "x": -7.416,
                  "y": 590.408
                },
                {
                  "x": -7.5,
                  "y": 589.0
                }
              ]
            }
          ]
        }
      ],
      "trafficLight": {
        "roadLinkIndices": [
          0,
          1,
          2,
          3,
          4,
          5,
          6,
          7,
          8,
          9,
          10,
          11
        ],
        "lightphases": [
          {
            "time": 5,
            "availableRoadLinks": [
              10,
              2,
              3,
              6
            ]
          },
          {
            "time": 30,
            "availableRoadLinks": [
              0,
              2,
              3,
              6,
              7,
              10
            ]
          },
          {
            "time": 30,
            "availableRoadLinks": [
              2,
              3,
              4,
              6,
              10,
              11
            ]
          },
          {
            "time": 30,
            "availableRoadLinks": [
              1,
              2,
              3,
              6,
              8,
              10
            ]
          },
          {
            "time": 30,
            "availableRoadLinks": [
              2,
              3,
              5,
              6,
              9,
              10
            ]
          },
          {
            "time": 30,
            "availableRoadLinks": [
              0,
              1,
              2,
              3,
              6,
              10
            ]
          },
          {
            "time": 30,
            "availableRoadLinks": [
              2,
              3,
              6,
              7,
              8,
              10
            ]
          },
          {
            "time": 30,
            "availableRoadLinks": [
              2,
              3,
              4,
              5,
              6,
              10
            ]
          },
          {
            "time": 30,
            "availableRoadLinks": [
              2,
              3,
              6,
              9,
              10,
              11
            ]
          }
        ]
      },
      "virtual": false
    },
    {
      "id": "intersection_1_4",
      "point": {
        "x": 0,
        "y": 900
      },
      "width": 0,
      "roads": [
        "road_1_3_1",
        "road_1_4_3"
      ],
      "roadLinks": [],
      "trafficLight": {
        "roadLinkIndices": [],
        "lightphases": [
          {
            "time": 5,
            "availableRoadLinks": []
          },
          {
            "time": 30,
            "availableRoadLinks": []
          },
          {
            "time": 30,
            "availableRoadLinks": []
          },
          {
            "time": 30,
            "availableRoadLinks": []
          },
          {
            "time": 30,
            "availableRoadLinks": []
          },
          {
            "time": 30,
            "availableRoadLinks": []
          },
          {
            "time": 30,
            "availableRoadLinks": []
          },
          {
            "time": 30,
            "availableRoadLinks": []
          },
          {
            "time": 30,
            "availableRoadLinks": []
          }
        ]
      },
      "virtual": true
    },
    {
      "id": "intersection_2_0",
      "point": {
        "x": 300,
        "y": -300
      },
      "width": 0,
      "roads": [
        "road_2_1_3",
        "road_2_0_1"
      ],
      "roadLinks": [],
      "trafficLight": {
        "roadLinkIndices": [],
        "lightphases": [
          {
            "time": 5,
            "availableRoadLinks": []
          },
          {
            "time": 30,
            "availableRoadLinks": []
          },
          {
            "time": 30,
            "availableRoadLinks": []
          },
          {
            "time": 30,
            "availableRoadLinks": []
          },
          {
            "time": 30,
            "availableRoadLinks": []
          },
          {
            "time": 30,
            "availableRoadLinks": []
          },
          {
            "time": 30,
            "availableRoadLinks": []
          },
          {
            "time": 30,
            "availableRoadLinks": []
          },
          {
            "time": 30,
            "availableRoadLinks": []
          }
        ]
      },
      "virtual": true
    },
    {
      "id": "intersection_2_1",
      "point": {
        "x": 300,
        "y": 0
      },
      "width": 11,
      "roads": [
        "road_1_1_0",
        "road_2_0_1",
        "road_3_1_2",
        "road_2_2_3",
        "road_2_1_0",
        "road_2_1_1",
        "road_2_1_2",
        "road_2_1_3"
      ],
      "roadLinks": [
        {
          "type": "go_straight",
          "startRoad": "road_1_1_0",
          "endRoad": "road_2_1_0",
          "direction": 0,
          "laneLinks": [
            {
              "startLaneIndex": 1,
              "endLaneIndex": 0,
              "points": [
                {
                  "x": 289.0,
                  "y": -4.5
                },
                {
                  "x": 290.408,
                  "y": -4.416
                },
                {
                  "x": 292.344,
                  "y": -4.188
                },
                {
                  "x": 294.676,
                  "y": -3.852
                },
                {
                  "x": 297.272,
                  "y": -3.444
                },
                {
                  "x": 300.0,
                  "y": -3.0
                },
                {
                  "x": 302.728,
                  "y": -2.556
                },
                {
                  "x": 305.324,
                  "y": -2.148
                },
                {
                  "x": 307.656,
                  "y": -1.811999999999999
                },
                {
                  "x": 309.592,
                  "y": -1.584
                },
                {
                  "x": 311.0,
                  "y": -1.5
                }
              ]
            },
            {
              "startLaneIndex": 1,
              "endLaneIndex": 1,
              "points": [
                {
                  "x": 289.0,
                  "y": -4.5
                },
                {
                  "x": 290.408,
                  "y": -4.5
                },
                {
                  "x": 292.344,
                  "y": -4.5
                },
                {
                  "x": 294.676,
                  "y": -4.5
                },
                {
                  "x": 297.272,
                  "y": -4.5
                },
                {
                  "x": 300.0,
                  "y": -4.5
                },
                {
                  "x": 302.728,
                  "y": -4.5
                },
                {
                  "x": 305.324,
                  "y": -4.5
                },
                {
                  "x": 307.656,
                  "y": -4.499999999999999
                },
                {
                  "x": 309.592,
                  "y": -4.5
                },
                {
                  "x": 311.0,
                  "y": -4.5
                }
              ]
            },
            {
              "startLaneIndex": 1,
              "endLaneIndex": 2,
              "points": [
                {
                  "x": 289.0,
                  "y": -4.5
                },
                {
                  "x": 290.408,
                  "y": -4.584
                },
                {
                  "x": 292.344,
                  "y": -4.812
                },
                {
                  "x": 294.676,
                  "y": -5.148
                },
                {
                  "x": 297.272,
                  "y": -5.556
                },
                {
                  "x": 300.0,
                  "y": -6.0
                },
                {
                  "x": 302.728,
                  "y": -6.444
                },
                {
                  "x": 305.324,
                  "y": -6.852
                },
                {
                  "x": 307.656,
                  "y": -7.187999999999999
                },
                {
                  "x": 309.592,
                  "y": -7.416
                },
                {
                  "x": 311.0,
                  "y": -7.5
                }
              ]
            }
          ]
        },
        {
          "type": "turn_left",
          "startRoad": "road_1_1_0",
          "endRoad": "road_2_1_1",
          "direction": 0,
          "laneLinks": [
            {
              "startLaneIndex": 0,
              "endLaneIndex": 0,
              "points": [
                {
                  "x": 289.0,
                  "y": -1.5
                },
                {
                  "x": 290.241,
                  "y": -1.249
                },
                {
                  "x": 291.70799999999997,
                  "y": -0.552
                },
                {
                  "x": 293.317,
                  "y": 0.507
                },
                {
                  "x": 294.984,
                  "y": 1.844
                },
                {
                  "x": 296.625,
                  "y": 3.375
                },
                {
                  "x": 298.156,
                  "y": 5.016
                },
                {
                  "x": 299.493,
                  "y": 6.683
                },
                {
                  "x": 300.552,
                  "y": 8.292
                },
                {
                  "x": 301.249,
                  "y": 9.759
                },
                {
                  "x": 301.5,
                  "y": 11.0
                }
              ]
            },
            {
              "startLaneIndex": 0,
              "endLaneIndex": 1,
              "points": [
                {
                  "x": 289.0,
                  "y": -1.5
                },
                {
                  "x": 290.325,
                  "y": -1.249
                },
                {
                  "x": 292.02,
                  "y": -0.552
                },
                {
                  "x": 293.965,
                  "y": 0.507
                },
                {
                  "x": 296.04,
                  "y": 1.844
                },
                {
                  "x": 298.125,
                  "y": 3.375
                },
                {
                  "x": 300.1,
                  "y": 5.016
                },
                {
                  "x": 301.845,
                  "y": 6.683
                },
                {
                  "x": 303.24,
                  "y": 8.292
                },
                {
                  "x": 304.165,
                  "y": 9.759
                },
                {
                  "x": 304.5,
                  "y": 11.0
                }
              ]
            },
            {
              "startLaneIndex": 0,
              "endLaneIndex": 2,
              "points": [
                {
                  "x": 289.0,
                  "y": -1.5
                },
                {
                  "x": 290.409,
                  "y": -1.249
                },
                {
                  "x": 292.332,
                  "y": -0.552
                },
                {
                  "x": 294.613,
                  "y": 0.507
                },
                {
                  "x": 297.096,
                  "y": 1.844
                },
                {
                  "x": 299.625,
                  "y": 3.375
                },
                {
                  "x": 302.044,
                  "y": 5.016
                },
                {
                  "x": 304.197,
                  "y": 6.683
                },
                {
                  "x": 305.928,
                  "y": 8.292
                },
                {
                  "x": 307.081,
                  "y": 9.759
                },
                {
                  "x": 307.5,
                  "y": 11.0
                }
              ]
            }
          ]
        },
        {
          "type": "turn_right",
          "startRoad": "road_1_1_0",
          "endRoad": "road_2_1_3",
          "direction": 0,
          "laneLinks": [
            {
              "startLaneIndex": 2,
              "endLaneIndex": 0,
              "points": [
                {
                  "x": 289.0,
                  "y": -7.5
                },
                {
                  "x": 290.157,
                  "y": -7.499
                },
                {
                  "x": 291.396,
                  "y": -7.512
                },
                {
                  "x": 292.669,
                  "y": -7.563
                },
                {
                  "x": 293.928,
                  "y": -7.676
                },
                {
                  "x": 295.125,
                  "y": -7.875
                },
                {
                  "x": 296.212,
                  "y": -8.184
                },
                {
                  "x": 297.141,
                  "y": -8.627
                },
                {
                  "x": 297.864,
                  "y": -9.228
                },
                {
                  "x": 298.333,
                  "y": -10.011
                },
                {
                  "x": 298.5,
                  "y": -11.0
                }
              ]
            },
            {
              "startLaneIndex": 2,
              "endLaneIndex": 1,
              "points": [
                {
                  "x": 289.0,
                  "y": -7.5
                },
                {
                  "x": 290.073,
                  "y": -7.499
                },
                {
                  "x": 291.084,
                  "y": -7.512
                },
                {
                  "x": 292.021,
                  "y": -7.563
                },
                {
                  "x": 292.872,
                  "y": -7.676
                },
                {
                  "x": 293.625,
                  "y": -7.875
                },
                {
                  "x": 294.268,
                  "y": -8.184
                },
                {
                  "x": 294.789,
                  "y": -8.627
                },
                {
                  "x": 295.176,
                  "y": -9.228
                },
                {
                  "x": 295.41700000000003,
                  "y": -10.011
                },
                {
                  "x": 295.5,
                  "y": -11.0
                }
              ]
            },
            {
              "startLaneIndex": 2,
              "endLaneIndex": 2,
              "points": [
                {
                  "x": 289.0,
                  "y": -7.5
                },
                {
                  "x": 289.989,
                  "y": -7.499
                },
                {
                  "x": 290.772,
                  "y": -7.512
                },
                {
                  "x": 291.373,
                  "y": -7.563
                },
                {
                  "x": 291.816,
                  "y": -7.676
                },
                {
                  "x": 292.125,
                  "y": -7.875
                },
                {
                  "x": 292.324,
                  "y": -8.184
                },
                {
                  "x": 292.437,
                  "y": -8.627
                },
                {
                  "x": 292.488,
                  "y": -9.228
                },
                {
                  "x": 292.50100000000003,
                  "y": -10.011
                },
                {
                  "x": 292.5,
                  "y": -11.0
                }
              ]
            }
          ]
        },
        {
          "type": "turn_right",
          "startRoad": "road_2_0_1",
          "endRoad": "road_2_1_0",
          "direction": 1,
          "laneLinks": [
            {
              "startLaneIndex": 2,
              "endLaneIndex": 0,
              "points": [
                {
                  "x": 307.5,
                  "y": -11.0
                },
                {
                  "x": 307.499,
                  "y": -9.843
                },
                {
                  "x": 307.512,
                  "y": -8.604
                },
                {
                  "x": 307.563,
                  "y": -7.3309999999999995
                },
                {
                  "x": 307.676,
                  "y": -6.072
                },
                {
                  "x": 307.875,
                  "y": -4.875
                },
                {
                  "x": 308.18399999999997,
                  "y": -3.788
                },
                {
                  "x": 308.627,
                  "y": -2.859000000000001
                },
                {
                  "x": 309.228,
                  "y": -2.136000000000001
                },
                {
                  "x": 310.011,
                  "y": -1.6669999999999998
                },
                {
                  "x": 311.0,
                  "y": -1.5
                }
              ]
            },
            {
              "startLaneIndex": 2,
              "endLaneIndex": 1,
              "points": [
                {
                  "x": 307.5,
                  "y": -11.0
                },
                {
                  "x": 307.499,
                  "y": -9.927
                },
                {
                  "x": 307.512,
                  "y": -8.916
                },
                {
                  "x": 307.563,
                  "y": -7.979
                },
                {
                  "x": 307.676,
                  "y": -7.128
                },
                {
                  "x": 307.875,
                  "y": -6.375
                },
                {
                  "x": 308.18399999999997,
                  "y": -5.732
                },
                {
                  "x": 308.627,
                  "y": -5.211000000000001
                },
                {
                  "x": 309.228,
                  "y": -4.824000000000001
                },
                {
                  "x": 310.011,
                  "y": -4.583
                },
                {
                  "x": 311.0,
                  "y": -4.5
                }
              ]
            },
            {
              "startLaneIndex": 2,
              "endLaneIndex": 2,
              "points": [
                {
                  "x": 307.5,
                  "y": -11.0
                },
                {
                  "x": 307.499,
                  "y": -10.011
                },
                {
                  "x": 307.512,
                  "y": -9.228
                },
                {
                  "x": 307.563,
                  "y": -8.627
                },
                {
                  "x": 307.676,
                  "y": -8.184
                },
                {
                  "x": 307.875,
                  "y": -7.875
                },
                {
                  "x": 308.18399999999997,
                  "y": -7.676
                },
                {
                  "x": 308.627,
                  "y": -7.563000000000001
                },
                {
                  "x": 309.228,
                  "y": -7.512000000000001
                },
                {
                  "x": 310.011,
                  "y": -7.499
                },
                {
                  "x": 311.0,
                  "y": -7.5
                }
              ]
            }
          ]
        },
        {
          "type": "go_straight",
          "startRoad": "road_2_0_1",
          "endRoad": "road_2_1_1",
          "direction": 1,
          "laneLinks": [
            {
              "startLaneIndex": 1,
              "endLaneIndex": 0,
              "points": [
                {
                  "x": 304.5,
                  "y": -11.0
                },
                {
                  "x": 304.416,
                  "y": -9.592
                },
                {
                  "x": 304.188,
                  "y": -7.656
                },
                {
                  "x": 303.852,
                  "y": -5.324
                },
                {
                  "x": 303.444,
                  "y": -2.7279999999999998
                },
                {
                  "x": 303.0,
                  "y": 0.0
                },
                {
                  "x": 302.556,
                  "y": 2.7279999999999998
                },
                {
                  "x": 302.148,
                  "y": 5.323999999999999
                },
                {
                  "x": 301.812,
                  "y": 7.655999999999999
                },
                {
                  "x": 301.584,
                  "y": 9.592
                },
                {
                  "x": 301.5,
                  "y": 11.0
                }
              ]
            },
            {
              "startLaneIndex": 1,
              "endLaneIndex": 1,
              "points": [
                {
                  "x": 304.5,
                  "y": -11.0
                },
                {
                  "x": 304.5,
                  "y": -9.592
                },
                {
                  "x": 304.5,
                  "y": -7.656
                },
                {
                  "x": 304.5,
                  "y": -5.324
                },
                {
                  "x": 304.5,
                  "y": -2.7279999999999998
                },
                {
                  "x": 304.5,
                  "y": 0.0
                },
                {
                  "x": 304.5,
                  "y": 2.7279999999999998
                },
                {
                  "x": 304.5,
                  "y": 5.323999999999999
                },
                {
                  "x": 304.5,
                  "y": 7.655999999999999
                },
                {
                  "x": 304.5,
                  "y": 9.592
                },
                {
                  "x": 304.5,
                  "y": 11.0
                }
              ]
            },
            {
              "startLaneIndex": 1,
              "endLaneIndex": 2,
              "points": [
                {
                  "x": 304.5,
                  "y": -11.0
                },
                {
                  "x": 304.584,
                  "y": -9.592
                },
                {
                  "x": 304.812,
                  "y": -7.656
                },
                {
                  "x": 305.148,
                  "y": -5.324
                },
                {
                  "x": 305.556,
                  "y": -2.7279999999999998
                },
                {
                  "x": 306.0,
                  "y": 0.0
                },
                {
                  "x": 306.444,
                  "y": 2.7279999999999998
                },
                {
                  "x": 306.852,
                  "y": 5.323999999999999
                },
                {
                  "x": 307.188,
                  "y": 7.655999999999999
                },
                {
                  "x": 307.416,
                  "y": 9.592
                },
                {
                  "x": 307.5,
                  "y": 11.0
                }
              ]
            }
          ]
        },
        {
          "type": "turn_left",
          "startRoad": "road_2_0_1",
          "endRoad": "road_2_1_2",
          "direction": 1,
          "laneLinks": [
            {
              "startLaneIndex": 0,
              "endLaneIndex": 0,
              "points": [
                {
                  "x": 301.5,
                  "y": -11.0
                },
                {
                  "x": 301.249,
                  "y": -9.759
                },
                {
                  "x": 300.552,
                  "y": -8.292
                },
                {
                  "x": 299.493,
                  "y": -6.683
                },
                {
                  "x": 298.156,
                  "y": -5.016
                },
                {
                  "x": 296.625,
                  "y": -3.375
                },
                {
                  "x": 294.984,
                  "y": -1.844
                },
                {
                  "x": 293.317,
                  "y": -0.507000000000001
                },
                {
                  "x": 291.70799999999997,
                  "y": 0.551999999999999
                },
                {
                  "x": 290.241,
                  "y": 1.249
                },
                {
                  "x": 289.0,
                  "y": 1.5
                }
              ]
            },
            {
              "startLaneIndex": 0,
              "endLaneIndex": 1,
              "points": [
                {
                  "x": 301.5,
                  "y": -11.0
                },
                {
                  "x": 301.249,
                  "y": -9.675
                },
                {
                  "x": 300.552,
                  "y": -7.98
                },
                {
                  "x": 299.493,
                  "y": -6.035
                },
                {
                  "x": 298.156,
                  "y": -3.96
                },
                {
                  "x": 296.625,
                  "y": -1.875
                },
                {
                  "x": 294.984,
                  "y": 0.1
                },
                {
                  "x": 293.317,
                  "y": 1.844999999999999
                },
                {
                  "x": 291.70799999999997,
                  "y": 3.239999999999999
                },
                {
                  "x": 290.241,
                  "y": 4.165
                },
                {
                  "x": 289.0,
                  "y": 4.5
                }
              ]
            },
            {
              "startLaneIndex": 0,
              "endLaneIndex": 2,
              "points": [
                {
                  "x": 301.5,
                  "y": -11.0
                },
                {
                  "x": 301.249,
                  "y": -9.591
                },
                {
                  "x": 300.552,
                  "y": -7.668
                },
                {
                  "x": 299.493,
                  "y": -5.387
                },
                {
                  "x": 298.156,
                  "y": -2.904
                },
                {
                  "x": 296.625,
                  "y": -0.375
                },
                {
                  "x": 294.984,
                  "y": 2.044
                },
                {
                  "x": 293.317,
                  "y": 4.196999999999999
                },
                {
                  "x": 291.70799999999997,
                  "y": 5.927999999999999
                },
                {
                  "x": 290.241,
                  "y": 7.081
                },
                {
                  "x": 289.0,
                  "y": 7.5
                }
              ]
            }
          ]
        },
        {
          "type": "turn_right",
          "startRoad": "road_3_1_2",
          "endRoad": "road_2_1_1",
          "direction": 2,
          "laneLinks": [
            {
              "startLaneIndex": 2,
              "endLaneIndex": 0,
              "points": [
                {
                  "x": 311.0,
                  "y": 7.5
                },
                {
                  "x": 309.843,
                  "y": 7.499
                },
                {
                  "x": 308.604,
                  "y": 7.512
                },
                {
                  "x": 307.331,
                  "y": 7.563
                },
                {
                  "x": 306.072,
                  "y": 7.676
                },
                {
                  "x": 304.875,
                  "y": 7.875
                },
                {
                  "x": 303.788,
                  "y": 8.184
                },
                {
                  "x": 302.859,
                  "y": 8.627
                },
                {
                  "x": 302.136,
                  "y": 9.228
                },
                {
                  "x": 301.66700000000003,
                  "y": 10.011
                },
                {
                  "x": 301.5,
                  "y": 11.0
                }
              ]
            },
            {
              "startLaneIndex": 2,
              "endLaneIndex": 1,
              "points": [
                {
                  "x": 311.0,
                  "y": 7.5
                },
                {
                  "x": 309.927,
                  "y": 7.499
                },
                {
                  "x": 308.916,
                  "y": 7.512
                },
                {
                  "x": 307.979,
                  "y": 7.563
                },
                {
                  "x": 307.128,
                  "y": 7.676
                },
                {
                  "x": 306.375,
                  "y": 7.875
                },
                {
                  "x": 305.73199999999997,
                  "y": 8.184
                },
                {
                  "x": 305.211,
                  "y": 8.627
                },
                {
                  "x": 304.824,
                  "y": 9.228
                },
                {
                  "x": 304.583,
                  "y": 10.011
                },
                {
                  "x": 304.5,
                  "y": 11.0
                }
              ]
            },
            {
              "startLaneIndex": 2,
              "endLaneIndex": 2,
              "points": [
                {
                  "x": 311.0,
                  "y": 7.5
                },
                {
                  "x": 310.011,
                  "y": 7.499
                },
                {
                  "x": 309.228,
                  "y": 7.512
                },
                {
                  "x": 308.627,
                  "y": 7.563
                },
                {
                  "x": 308.18399999999997,
                  "y": 7.676
                },
                {
                  "x": 307.875,
                  "y": 7.875
                },
                {
                  "x": 307.676,
                  "y": 8.184
                },
                {
                  "x": 307.563,
                  "y": 8.627
                },
                {
                  "x": 307.512,
                  "y": 9.228
                },
                {
                  "x": 307.499,
                  "y": 10.011
                },
                {
                  "x": 307.5,
                  "y": 11.0
                }
              ]
            }
          ]
        },
        {
          "type": "go_straight",
          "startRoad": "road_3_1_2",
          "endRoad": "road_2_1_2",
          "direction": 2,
          "laneLinks": [
            {
              "startLaneIndex": 1,
              "endLaneIndex": 0,
              "points": [
                {
                  "x": 311.0,
                  "y": 4.5
                },
                {
                  "x": 309.592,
                  "y": 4.416
                },
                {
                  "x": 307.656,
                  "y": 4.188
                },
                {
                  "x": 305.324,
                  "y": 3.852
                },
                {
                  "x": 302.728,
                  "y": 3.444
                },
                {
                  "x": 300.0,
                  "y": 3.0
                },
                {
                  "x": 297.272,
                  "y": 2.556
                },
                {
                  "x": 294.676,
                  "y": 2.148
                },
                {
                  "x": 292.344,
                  "y": 1.811999999999999
                },
                {
                  "x": 290.408,
                  "y": 1.584
                },
                {
                  "x": 289.0,
                  "y": 1.5
                }
              ]
            },
            {
              "startLaneIndex": 1,
              "endLaneIndex": 1,
              "points": [
                {
                  "x": 311.0,
                  "y": 4.5
                },
                {
                  "x": 309.592,
                  "y": 4.5
                },
                {
                  "x": 307.656,
                  "y": 4.5
                },
                {
                  "x": 305.324,
                  "y": 4.5
                },
                {
                  "x": 302.728,
                  "y": 4.5
                },
                {
                  "x": 300.0,
                  "y": 4.5
                },
                {
                  "x": 297.272,
                  "y": 4.5
                },
                {
                  "x": 294.676,
                  "y": 4.5
                },
                {
                  "x": 292.344,
                  "y": 4.499999999999999
                },
                {
                  "x": 290.408,
                  "y": 4.5
                },
                {
                  "x": 289.0,
                  "y": 4.5
                }
              ]
            },
            {
              "startLaneIndex": 1,
              "endLaneIndex": 2,
              "points": [
                {
                  "x": 311.0,
                  "y": 4.5
                },
                {
                  "x": 309.592,
                  "y": 4.584
                },
                {
                  "x": 307.656,
                  "y": 4.812
                },
                {
                  "x": 305.324,
                  "y": 5.148
                },
                {
                  "x": 302.728,
                  "y": 5.556
                },
                {
                  "x": 300.0,
                  "y": 6.0
                },
                {
                  "x": 297.272,
                  "y": 6.444
                },
                {
                  "x": 294.676,
                  "y": 6.852
                },
                {
                  "x": 292.344,
                  "y": 7.187999999999999
                },
                {
                  "x": 290.408,
                  "y": 7.416
                },
                {
                  "x": 289.0,
                  "y": 7.5
                }
              ]
            }
          ]
        },
        {
          "type": "turn_left",
          "startRoad": "road_3_1_2",
          "endRoad": "road_2_1_3",
          "direction": 2,
          "laneLinks": [
            {
              "startLaneIndex": 0,
              "endLaneIndex": 0,
              "points": [
                {
                  "x": 311.0,
                  "y": 1.5
                },
                {
                  "x": 309.759,
                  "y": 1.249
                },
                {
                  "x": 308.292,
                  "y": 0.552
                },
                {
                  "x": 306.683,
                  "y": -0.507
                },
                {
                  "x": 305.016,
                  "y": -1.844
                },
                {
                  "x": 303.375,
                  "y": -3.375
                },
                {
                  "x": 301.844,
                  "y": -5.016
                },
                {
                  "x": 300.507,
                  "y": -6.683
                },
                {
                  "x": 299.448,
                  "y": -8.292
                },
                {
                  "x": 298.75100000000003,
                  "y": -9.759
                },
                {
                  "x": 298.5,
                  "y": -11.0
                }
              ]
            },
            {
              "startLaneIndex": 0,
              "endLaneIndex": 1,
              "points": [
                {
                  "x": 311.0,
                  "y": 1.5
                },
                {
                  "x": 309.675,
                  "y": 1.249
                },
                {
                  "x": 307.98,
                  "y": 0.552
                },
                {
                  "x": 306.03499999999997,
                  "y": -0.507
                },
                {
                  "x": 303.96,
                  "y": -1.844
                },
                {
                  "x": 301.875,
                  "y": -3.375
                },
                {
                  "x": 299.9,
                  "y": -5.016
                },
                {
                  "x": 298.155,
                  "y": -6.683
                },
                {
                  "x": 296.76,
                  "y": -8.292
                },
                {
                  "x": 295.83500000000004,
                  "y": -9.759
                },
                {
                  "x": 295.5,
                  "y": -11.0
                }
              ]
            },
            {
              "startLaneIndex": 0,
              "endLaneIndex": 2,
              "points": [
                {
                  "x": 311.0,
                  "y": 1.5
                },
                {
                  "x": 309.591,
                  "y": 1.249
                },
                {
                  "x": 307.668,
                  "y": 0.552
                },
                {
                  "x": 305.387,
                  "y": -0.507
                },
                {
                  "x": 302.904,
                  "y": -1.844
                },
                {
                  "x": 300.375,
                  "y": -3.375
                },
                {
                  "x": 297.956,
                  "y": -5.016
                },
                {
                  "x": 295.803,
                  "y": -6.683
                },
                {
                  "x": 294.072,
                  "y": -8.292
                },
                {
                  "x": 292.919,
                  "y": -9.759
                },
                {
                  "x": 292.5,
                  "y": -11.0
                }
              ]
            }
          ]
        },
        {
          "type": "turn_left",
          "startRoad": "road_2_2_3",
          "endRoad": "road_2_1_0",
          "direction": 3,
          "laneLinks": [
            {
              "startLaneIndex": 0,
              "endLaneIndex": 0,
              "points": [
                {
                  "x": 298.5,
                  "y": 11.0
                },
                {
                  "x": 298.751,
                  "y": 9.759
                },
                {
                  "x": 299.448,
                  "y": 8.292
                },
                {
                  "x": 300.507,
                  "y": 6.683
                },
                {
                  "x": 301.844,
                  "y": 5.016
                },
                {
                  "x": 303.375,
                  "y": 3.375
                },
                {
                  "x": 305.016,
                  "y": 1.844
                },
                {
                  "x": 306.683,
                  "y": 0.507000000000001
                },
                {
                  "x": 308.292,
                  "y": -0.551999999999999
                },
                {
                  "x": 309.759,
                  "y": -1.249
                },
                {
                  "x": 311.0,
                  "y": -1.5
                }
              ]
            },
            {
              "startLaneIndex": 0,
              "endLaneIndex": 1,
              "points": [
                {
                  "x": 298.5,
                  "y": 11.0
                },
                {
                  "x": 298.751,
                  "y": 9.675
                },
                {
                  "x": 299.448,
                  "y": 7.98
                },
                {
                  "x": 300.507,
                  "y": 6.035
                },
                {
                  "x": 301.844,
                  "y": 3.96
                },
                {
                  "x": 303.375,
                  "y": 1.875
                },
                {
                  "x": 305.016,
                  "y": -0.1
                },
                {
                  "x": 306.683,
                  "y": -1.844999999999999
                },
                {
                  "x": 308.292,
                  "y": -3.239999999999999
                },
                {
                  "x": 309.759,
                  "y": -4.165
                },
                {
                  "x": 311.0,
                  "y": -4.5
                }
              ]
            },
            {
              "startLaneIndex": 0,
              "endLaneIndex": 2,
              "points": [
                {
                  "x": 298.5,
                  "y": 11.0
                },
                {
                  "x": 298.751,
                  "y": 9.591
                },
                {
                  "x": 299.448,
                  "y": 7.668
                },
                {
                  "x": 300.507,
                  "y": 5.387
                },
                {
                  "x": 301.844,
                  "y": 2.904
                },
                {
                  "x": 303.375,
                  "y": 0.375
                },
                {
                  "x": 305.016,
                  "y": -2.044
                },
                {
                  "x": 306.683,
                  "y": -4.196999999999999
                },
                {
                  "x": 308.292,
                  "y": -5.927999999999999
                },
                {
                  "x": 309.759,
                  "y": -7.081
                },
                {
                  "x": 311.0,
                  "y": -7.5
                }
              ]
            }
          ]
        },
        {
          "type": "turn_right",
          "startRoad": "road_2_2_3",
          "endRoad": "road_2_1_2",
          "direction": 3,
          "laneLinks": [
            {
              "startLaneIndex": 2,
              "endLaneIndex": 0,
              "points": [
                {
                  "x": 292.5,
                  "y": 11.0
                },
                {
                  "x": 292.501,
                  "y": 9.843
                },
                {
                  "x": 292.488,
                  "y": 8.604
                },
                {
                  "x": 292.437,
                  "y": 7.3309999999999995
                },
                {
                  "x": 292.324,
                  "y": 6.072
                },
                {
                  "x": 292.125,
                  "y": 4.875
                },
                {
                  "x": 291.816,
                  "y": 3.788
                },
                {
                  "x": 291.373,
                  "y": 2.859000000000001
                },
                {
                  "x": 290.772,
                  "y": 2.136000000000001
                },
                {
                  "x": 289.98900000000003,
                  "y": 1.6669999999999998
                },
                {
                  "x": 289.0,
                  "y": 1.5
                }
              ]
            },
            {
              "startLaneIndex": 2,
              "endLaneIndex": 1,
              "points": [
                {
                  "x": 292.5,
                  "y": 11.0
                },
                {
                  "x": 292.501,
                  "y": 9.927
                },
                {
                  "x": 292.488,
                  "y": 8.916
                },
                {
                  "x": 292.437,
                  "y": 7.979
                },
                {
                  "x": 292.324,
                  "y": 7.128
                },
                {
                  "x": 292.125,
                  "y": 6.375
                },
                {
                  "x": 291.816,
                  "y": 5.732
                },
                {
                  "x": 291.373,
                  "y": 5.211000000000001
                },
                {
                  "x": 290.772,
                  "y": 4.824000000000001
                },
                {
                  "x": 289.98900000000003,
                  "y": 4.583
                },
                {
                  "x": 289.0,
                  "y": 4.5
                }
              ]
            },
            {
              "startLaneIndex": 2,
              "endLaneIndex": 2,
              "points": [
                {
                  "x": 292.5,
                  "y": 11.0
                },
                {
                  "x": 292.501,
                  "y": 10.011
                },
                {
                  "x": 292.488,
                  "y": 9.228
                },
                {
                  "x": 292.437,
                  "y": 8.627
                },
                {
                  "x": 292.324,
                  "y": 8.184
                },
                {
                  "x": 292.125,
                  "y": 7.875
                },
                {
                  "x": 291.816,
                  "y": 7.676
                },
                {
                  "x": 291.373,
                  "y": 7.563000000000001
                },
                {
                  "x": 290.772,
                  "y": 7.512000000000001
                },
                {
                  "x": 289.98900000000003,
                  "y": 7.499
                },
                {
                  "x": 289.0,
                  "y": 7.5
                }
              ]
            }
          ]
        },
        {
          "type": "go_straight",
          "startRoad": "road_2_2_3",
          "endRoad": "road_2_1_3",
          "direction": 3,
          "laneLinks": [
            {
              "startLaneIndex": 1,
              "endLaneIndex": 0,
              "points": [
                {
                  "x": 295.5,
                  "y": 11.0
                },
                {
                  "x": 295.584,
                  "y": 9.592
                },
                {
                  "x": 295.812,
                  "y": 7.656
                },
                {
                  "x": 296.148,
                  "y": 5.324
                },
                {
                  "x": 296.556,
                  "y": 2.7279999999999998
                },
                {
                  "x": 297.0,
                  "y": 0.0
                },
                {
                  "x": 297.444,
                  "y": -2.7279999999999998
                },
                {
                  "x": 297.852,
                  "y": -5.323999999999999
                },
                {
                  "x": 298.188,
                  "y": -7.655999999999999
                },
                {
                  "x": 298.416,
                  "y": -9.592
                },
                {
                  "x": 298.5,
                  "y": -11.0
                }
              ]
            },
            {
              "startLaneIndex": 1,
              "endLaneIndex": 1,
              "points": [
                {
                  "x": 295.5,
                  "y": 11.0
                },
                {
                  "x": 295.5,
                  "y": 9.592
                },
                {
                  "x": 295.5,
                  "y": 7.656
                },
                {
                  "x": 295.5,
                  "y": 5.324
                },
                {
                  "x": 295.5,
                  "y": 2.7279999999999998
                },
                {
                  "x": 295.5,
                  "y": 0.0
                },
                {
                  "x": 295.5,
                  "y": -2.7279999999999998
                },
                {
                  "x": 295.5,
                  "y": -5.323999999999999
                },
                {
                  "x": 295.5,
                  "y": -7.655999999999999
                },
                {
                  "x": 295.5,
                  "y": -9.592
                },
                {
                  "x": 295.5,
                  "y": -11.0
                }
              ]
            },
            {
              "startLaneIndex": 1,
              "endLaneIndex": 2,
              "points": [
                {
                  "x": 295.5,
                  "y": 11.0
                },
                {
                  "x": 295.416,
                  "y": 9.592
                },
                {
                  "x": 295.188,
                  "y": 7.656
                },
                {
                  "x": 294.852,
                  "y": 5.324
                },
                {
                  "x": 294.444,
                  "y": 2.7279999999999998
                },
                {
                  "x": 294.0,
                  "y": 0.0
                },
                {
                  "x": 293.556,
                  "y": -2.7279999999999998
                },
                {
                  "x": 293.148,
                  "y": -5.323999999999999
                },
                {
                  "x": 292.812,
                  "y": -7.655999999999999
                },
                {
                  "x": 292.584,
                  "y": -9.592
                },
                {
                  "x": 292.5,
                  "y": -11.0
                }
              ]
            }
          ]
        }
      ],
      "trafficLight": {
        "roadLinkIndices": [
          0,
          1,
          2,
          3,
          4,
          5,
          6,
          7,
          8,
          9,
          10,
          11
        ],
        "lightphases": [
          {
            "time": 5,
            "availableRoadLinks": [
              10,
              2,
              3,
              6
            ]
          },
          {
            "time": 30,
            "availableRoadLinks": [
              0,
              2,
              3,
              6,
              7,
              10
            ]
          },
          {
            "time": 30,
            "availableRoadLinks": [
              2,
              3,
              4,
              6,
              10,
              11
            ]
          },
          {
            "time": 30,
            "availableRoadLinks": [
              1,
              2,
              3,
              6,
              8,
              10
            ]
          },
          {
            "time": 30,
            "availableRoadLinks": [
              2,
              3,
              5,
              6,
              9,
              10
            ]
          },
          {
            "time": 30,
            "availableRoadLinks": [
              0,
              1,
              2,
              3,
              6,
              10
            ]
          },
          {
            "time": 30,
            "availableRoadLinks": [
              2,
              3,
              6,
              7,
              8,
              10
            ]
          },
          {
            "time": 30,
            "availableRoadLinks": [
              2,
              3,
              4,
              5,
              6,
              10
            ]
          },
          {
            "time": 30,
            "availableRoadLinks": [
              2,
              3,
              6,
              9,
              10,
              11
            ]
          }
        ]
      },
      "virtual": false
    },
    {
      "id": "intersection_2_2",
      "point": {
        "x": 300,
        "y": 300
      },
      "width": 11,
      "roads": [
        "road_1_2_0",
        "road_2_1_1",
        "road_3_2_2",
        "road_2_3_3",
        "road_2_2_0",
        "road_2_2_1",
        "road_2_2_2",
        "road_2_2_3"
      ],
      "roadLinks": [
        {
          "type": "go_straight",
          "startRoad": "road_1_2_0",
          "endRoad": "road_2_2_0",
          "direction": 0,
          "laneLinks": [
            {
              "startLaneIndex": 1,
              "endLaneIndex": 0,
              "points": [
                {
                  "x": 289.0,
                  "y": 295.5
                },
                {
                  "x": 290.408,
                  "y": 295.584
                },
                {
                  "x": 292.344,
                  "y": 295.812
                },
                {
                  "x": 294.676,
                  "y": 296.148
                },
                {
                  "x": 297.272,
                  "y": 296.556
                },
                {
                  "x": 300.0,
                  "y": 297.0
                },
                {
                  "x": 302.728,
                  "y": 297.444
                },
                {
                  "x": 305.324,
                  "y": 297.852
                },
                {
                  "x": 307.656,
                  "y": 298.188
                },
                {
                  "x": 309.592,
                  "y": 298.416
                },
                {
                  "x": 311.0,
                  "y": 298.5
                }
              ]
            },
            {
              "startLaneIndex": 1,
              "endLaneIndex": 1,
              "points": [
                {
                  "x": 289.0,
                  "y": 295.5
                },
                {
                  "x": 290.408,
                  "y": 295.5
                },
                {
                  "x": 292.344,
                  "y": 295.5
                },
                {
                  "x": 294.676,
                  "y": 295.5
                },
                {
                  "x": 297.272,
                  "y": 295.5
                },
                {
                  "x": 300.0,
                  "y": 295.5
                },
                {
                  "x": 302.728,
                  "y": 295.5
                },
                {
                  "x": 305.324,
                  "y": 295.5
                },
                {
                  "x": 307.656,
                  "y": 295.5
                },
                {
                  "x": 309.592,
                  "y": 295.5
                },
                {
                  "x": 311.0,
                  "y": 295.5
                }
              ]
            },
            {
              "startLaneIndex": 1,
              "endLaneIndex": 2,
              "points": [
                {
                  "x": 289.0,
                  "y": 295.5
                },
                {
                  "x": 290.408,
                  "y": 295.416
                },
                {
                  "x": 292.344,
                  "y": 295.188
                },
                {
                  "x": 294.676,
                  "y": 294.852
                },
                {
                  "x": 297.272,
                  "y": 294.444
                },
                {
                  "x": 300.0,
                  "y": 294.0
                },
                {
                  "x": 302.728,
                  "y": 293.556
                },
                {
                  "x": 305.324,
                  "y": 293.148
                },
                {
                  "x": 307.656,
                  "y": 292.812
                },
                {
                  "x": 309.592,
                  "y": 292.584
                },
                {
                  "x": 311.0,
                  "y": 292.5
                }
              ]
            }
          ]
        },
        {
          "type": "turn_left",
          "startRoad": "road_1_2_0",
          "endRoad": "road_2_2_1",
          "direction": 0,
          "laneLinks": [
            {
              "startLaneIndex": 0,
              "endLaneIndex": 0,
              "points": [
                {
                  "x": 289.0,
                  "y": 298.5
                },
                {
                  "x": 290.241,
                  "y": 298.751
                },
                {
                  "x": 291.70799999999997,
                  "y": 299.448
                },
                {
                  "x": 293.317,
                  "y": 300.507
                },
                {
                  "x": 294.984,
                  "y": 301.844
                },
                {
                  "x": 296.625,
                  "y": 303.375
                },
                {
                  "x": 298.156,
                  "y": 305.016
                },
                {
                  "x": 299.493,
                  "y": 306.683
                },
                {
                  "x": 300.552,
                  "y": 308.292
                },
                {
                  "x": 301.249,
                  "y": 309.759
                },
                {
                  "x": 301.5,
                  "y": 311.0
                }
              ]
            },
            {
              "startLaneIndex": 0,
              "endLaneIndex": 1,
              "points": [
                {
                  "x": 289.0,
                  "y": 298.5
                },
                {
                  "x": 290.325,
                  "y": 298.751
                },
                {
                  "x": 292.02,
                  "y": 299.448
                },
                {
                  "x": 293.965,
                  "y": 300.507
                },
                {
                  "x": 296.04,
                  "y": 301.844
                },
                {
                  "x": 298.125,
                  "y": 303.375
                },
                {
                  "x": 300.1,
                  "y": 305.016
                },
                {
                  "x": 301.845,
                  "y": 306.683
                },
                {
                  "x": 303.24,
                  "y": 308.292
                },
                {
                  "x": 304.165,
                  "y": 309.759
                },
                {
                  "x": 304.5,
                  "y": 311.0
                }
              ]
            },
            {
              "startLaneIndex": 0,
              "endLaneIndex": 2,
              "points": [
                {
                  "x": 289.0,
                  "y": 298.5
                },
                {
                  "x": 290.409,
                  "y": 298.751
                },
                {
                  "x": 292.332,
                  "y": 299.448
                },
                {
                  "x": 294.613,
                  "y": 300.507
                },
                {
                  "x": 297.096,
                  "y": 301.844
                },
                {
                  "x": 299.625,
                  "y": 303.375
                },
                {
                  "x": 302.044,
                  "y": 305.016
                },
                {
                  "x": 304.197,
                  "y": 306.683
                },
                {
                  "x": 305.928,
                  "y": 308.292
                },
                {
                  "x": 307.081,
                  "y": 309.759
                },
                {
                  "x": 307.5,
                  "y": 311.0
                }
              ]
            }
          ]
        },
        {
          "type": "turn_right",
          "startRoad": "road_1_2_0",
          "endRoad": "road_2_2_3",
          "direction": 0,
          "laneLinks": [
            {
              "startLaneIndex": 2,
              "endLaneIndex": 0,
              "points": [
                {
                  "x": 289.0,
                  "y": 292.5
                },
                {
                  "x": 290.157,
                  "y": 292.501
                },
                {
                  "x": 291.396,
                  "y": 292.488
                },
                {
                  "x": 292.669,
                  "y": 292.437
                },
                {
                  "x": 293.928,
                  "y": 292.324
                },
                {
                  "x": 295.125,
                  "y": 292.125
                },
                {
                  "x": 296.212,
                  "y": 291.816
                },
                {
                  "x": 297.141,
                  "y": 291.373
                },
                {
                  "x": 297.864,
                  "y": 290.772
                },
                {
                  "x": 298.333,
                  "y": 289.98900000000003
                },
                {
                  "x": 298.5,
                  "y": 289.0
                }
              ]
            },
            {
              "startLaneIndex": 2,
              "endLaneIndex": 1,
              "points": [
                {
                  "x": 289.0,
                  "y": 292.5
                },
                {
                  "x": 290.073,
                  "y": 292.501
                },
                {
                  "x": 291.084,
                  "y": 292.488
                },
                {
                  "x": 292.021,
                  "y": 292.437
                },
                {
                  "x": 292.872,
                  "y": 292.324
                },
                {
                  "x": 293.625,
                  "y": 292.125
                },
                {
                  "x": 294.268,
                  "y": 291.816
                },
                {
                  "x": 294.789,
                  "y": 291.373
                },
                {
                  "x": 295.176,
                  "y": 290.772
                },
                {
                  "x": 295.41700000000003,
                  "y": 289.98900000000003
                },
                {
                  "x": 295.5,
                  "y": 289.0
                }
              ]
            },
            {
              "startLaneIndex": 2,
              "endLaneIndex": 2,
              "points": [
                {
                  "x": 289.0,
                  "y": 292.5
                },
                {
                  "x": 289.989,
                  "y": 292.501
                },
                {
                  "x": 290.772,
                  "y": 292.488
                },
                {
                  "x": 291.373,
                  "y": 292.437
                },
                {
                  "x": 291.816,
                  "y": 292.324
                },
                {
                  "x": 292.125,
                  "y": 292.125
                },
                {
                  "x": 292.324,
                  "y": 291.816
                },
                {
                  "x": 292.437,
                  "y": 291.373
                },
                {
                  "x": 292.488,
                  "y": 290.772
                },
                {
                  "x": 292.50100000000003,
                  "y": 289.98900000000003
                },
                {
                  "x": 292.5,
                  "y": 289.0
                }
              ]
            }
          ]
        },
        {
          "type": "turn_right",
          "startRoad": "road_2_1_1",
          "endRoad": "road_2_2_0",
          "direction": 1,
          "laneLinks": [
            {
              "startLaneIndex": 2,
              "endLaneIndex": 0,
              "points": [
                {
                  "x": 307.5,
                  "y": 289.0
                },
                {
                  "x": 307.499,
                  "y": 290.157
                },
                {
                  "x": 307.512,
                  "y": 291.396
                },
                {
                  "x": 307.563,
                  "y": 292.669
                },
                {
                  "x": 307.676,
                  "y": 293.928
                },
                {
                  "x": 307.875,
                  "y": 295.125
                },
                {
                  "x": 308.18399999999997,
                  "y": 296.212
                },
                {
                  "x": 308.627,
                  "y": 297.141
                },
                {
                  "x": 309.228,
                  "y": 297.864
                },
                {
                  "x": 310.011,
                  "y": 298.333
                },
                {
                  "x": 311.0,
                  "y": 298.5
                }
              ]
            },
            {
              "startLaneIndex": 2,
              "endLaneIndex": 1,
              "points": [
                {
                  "x": 307.5,
                  "y": 289.0
                },
                {
                  "x": 307.499,
                  "y": 290.073
                },
                {
                  "x": 307.512,
                  "y": 291.084
                },
                {
                  "x": 307.563,
                  "y": 292.021
                },
                {
                  "x": 307.676,
                  "y": 292.872
                },
                {
                  "x": 307.875,
                  "y": 293.625
                },
                {
                  "x": 308.18399999999997,
                  "y": 294.268
                },
                {
                  "x": 308.627,
                  "y": 294.789
                },
                {
                  "x": 309.228,
                  "y": 295.176
                },
                {
                  "x": 310.011,
                  "y": 295.41700000000003
                },
                {
                  "x": 311.0,
                  "y": 295.5
                }
              ]
            },
            {
              "startLaneIndex": 2,
              "endLaneIndex": 2,
              "points": [
                {
                  "x": 307.5,
                  "y": 289.0
                },
                {
                  "x": 307.499,
                  "y": 289.989
                },
                {
                  "x": 307.512,
                  "y": 290.772
                },
                {
                  "x": 307.563,
                  "y": 291.373
                },
                {
                  "x": 307.676,
                  "y": 291.816
                },
                {
                  "x": 307.875,
                  "y": 292.125
                },
                {
                  "x": 308.18399999999997,
                  "y": 292.324
                },
                {
                  "x": 308.627,
                  "y": 292.437
                },
                {
                  "x": 309.228,
                  "y": 292.488
                },
                {
                  "x": 310.011,
                  "y": 292.50100000000003
                },
                {
                  "x": 311.0,
                  "y": 292.5
                }
              ]
            }
          ]
        },
        {
          "type": "go_straight",
          "startRoad": "road_2_1_1",
          "endRoad": "road_2_2_1",
          "direction": 1,
          "laneLinks": [
            {
              "startLaneIndex": 1,
              "endLaneIndex": 0,
              "points": [
                {
                  "x": 304.5,
                  "y": 289.0
                },
                {
                  "x": 304.416,
                  "y": 290.408
                },
                {
                  "x": 304.188,
                  "y": 292.344
                },
                {
                  "x": 303.852,
                  "y": 294.676
                },
                {
                  "x": 303.444,
                  "y": 297.272
                },
                {
                  "x": 303.0,
                  "y": 300.0
                },
                {
                  "x": 302.556,
                  "y": 302.728
                },
                {
                  "x": 302.148,
                  "y": 305.324
                },
                {
                  "x": 301.812,
                  "y": 307.656
                },
                {
                  "x": 301.584,
                  "y": 309.592
                },
                {
                  "x": 301.5,
                  "y": 311.0
                }
              ]
            },
            {
              "startLaneIndex": 1,
              "endLaneIndex": 1,
              "points": [
                {
                  "x": 304.5,
                  "y": 289.0
                },
                {
                  "x": 304.5,
                  "y": 290.408
                },
                {
                  "x": 304.5,
                  "y": 292.344
                },
                {
                  "x": 304.5,
                  "y": 294.676
                },
                {
                  "x": 304.5,
                  "y": 297.272
                },
                {
                  "x": 304.5,
                  "y": 300.0
                },
                {
                  "x": 304.5,
                  "y": 302.728
                },
                {
                  "x": 304.5,
                  "y": 305.324
                },
                {
                  "x": 304.5,
                  "y": 307.656
                },
                {
                  "x": 304.5,
                  "y": 309.592
                },
                {
                  "x": 304.5,
                  "y": 311.0
                }
              ]
            },
            {
              "startLaneIndex": 1,
              "endLaneIndex": 2,
              "points": [
                {
                  "x": 304.5,
                  "y": 289.0
                },
                {
                  "x": 304.584,
                  "y": 290.408
                },
                {
                  "x": 304.812,
                  "y": 292.344
                },
                {
                  "x": 305.148,
                  "y": 294.676
                },
                {
                  "x": 305.556,
                  "y": 297.272
                },
                {
                  "x": 306.0,
                  "y": 300.0
                },
                {
                  "x": 306.444,
                  "y": 302.728
                },
                {
                  "x": 306.852,
                  "y": 305.324
                },
                {
                  "x": 307.188,
                  "y": 307.656
                },
                {
                  "x": 307.416,
                  "y": 309.592
                },
                {
                  "x": 307.5,
                  "y": 311.0
                }
              ]
            }
          ]
        },
        {
          "type": "turn_left",
          "startRoad": "road_2_1_1",
          "endRoad": "road_2_2_2",
          "direction": 1,
          "laneLinks": [
            {
              "startLaneIndex": 0,
              "endLaneIndex": 0,
              "points": [
                {
                  "x": 301.5,
                  "y": 289.0
                },
                {
                  "x": 301.249,
                  "y": 290.241
                },
                {
                  "x": 300.552,
                  "y": 291.70799999999997
                },
                {
                  "x": 299.493,
                  "y": 293.317
                },
                {
                  "x": 298.156,
                  "y": 294.984
                },
                {
                  "x": 296.625,
                  "y": 296.625
                },
                {
                  "x": 294.984,
                  "y": 298.156
                },
                {
                  "x": 293.317,
                  "y": 299.493
                },
                {
                  "x": 291.70799999999997,
                  "y": 300.552
                },
                {
                  "x": 290.241,
                  "y": 301.249
                },
                {
                  "x": 289.0,
                  "y": 301.5
                }
              ]
            },
            {
              "startLaneIndex": 0,
              "endLaneIndex": 1,
              "points": [
                {
                  "x": 301.5,
                  "y": 289.0
                },
                {
                  "x": 301.249,
                  "y": 290.325
                },
                {
                  "x": 300.552,
                  "y": 292.02
                },
                {
                  "x": 299.493,
                  "y": 293.965
                },
                {
                  "x": 298.156,
                  "y": 296.04
                },
                {
                  "x": 296.625,
                  "y": 298.125
                },
                {
                  "x": 294.984,
                  "y": 300.1
                },
                {
                  "x": 293.317,
                  "y": 301.845
                },
                {
                  "x": 291.70799999999997,
                  "y": 303.24
                },
                {
                  "x": 290.241,
                  "y": 304.165
                },
                {
                  "x": 289.0,
                  "y": 304.5
                }
              ]
            },
            {
              "startLaneIndex": 0,
              "endLaneIndex": 2,
              "points": [
                {
                  "x": 301.5,
                  "y": 289.0
                },
                {
                  "x": 301.249,
                  "y": 290.409
                },
                {
                  "x": 300.552,
                  "y": 292.332
                },
                {
                  "x": 299.493,
                  "y": 294.613
                },
                {
                  "x": 298.156,
                  "y": 297.096
                },
                {
                  "x": 296.625,
                  "y": 299.625
                },
                {
                  "x": 294.984,
                  "y": 302.044
                },
                {
                  "x": 293.317,
                  "y": 304.197
                },
                {
                  "x": 291.70799999999997,
                  "y": 305.928
                },
                {
                  "x": 290.241,
                  "y": 307.081
                },
                {
                  "x": 289.0,
                  "y": 307.5
                }
              ]
            }
          ]
        },
        {
          "type": "turn_right",
          "startRoad": "road_3_2_2",
          "endRoad": "road_2_2_1",
          "direction": 2,
          "laneLinks": [
            {
              "startLaneIndex": 2,
              "endLaneIndex": 0,
              "points": [
                {
                  "x": 311.0,
                  "y": 307.5
                },
                {
                  "x": 309.843,
                  "y": 307.499
                },
                {
                  "x": 308.604,
                  "y": 307.512
                },
                {
                  "x": 307.331,
                  "y": 307.563
                },
                {
                  "x": 306.072,
                  "y": 307.676
                },
                {
                  "x": 304.875,
                  "y": 307.875
                },
                {
                  "x": 303.788,
                  "y": 308.18399999999997
                },
                {
                  "x": 302.859,
                  "y": 308.627
                },
                {
                  "x": 302.136,
                  "y": 309.228
                },
                {
                  "x": 301.66700000000003,
                  "y": 310.011
                },
                {
                  "x": 301.5,
                  "y": 311.0
                }
              ]
            },
            {
              "startLaneIndex": 2,
              "endLaneIndex": 1,
              "points": [
                {
                  "x": 311.0,
                  "y": 307.5
                },
                {
                  "x": 309.927,
                  "y": 307.499
                },
                {
                  "x": 308.916,
                  "y": 307.512
                },
                {
                  "x": 307.979,
                  "y": 307.563
                },
                {
                  "x": 307.128,
                  "y": 307.676
                },
                {
                  "x": 306.375,
                  "y": 307.875
                },
                {
                  "x": 305.73199999999997,
                  "y": 308.18399999999997
                },
                {
                  "x": 305.211,
                  "y": 308.627
                },
                {
                  "x": 304.824,
                  "y": 309.228
                },
                {
                  "x": 304.583,
                  "y": 310.011
                },
                {
                  "x": 304.5,
                  "y": 311.0
                }
              ]
            },
            {
              "startLaneIndex": 2,
              "endLaneIndex": 2,
              "points": [
                {
                  "x": 311.0,
                  "y": 307.5
                },
                {
                  "x": 310.011,
                  "y": 307.499
                },
                {
                  "x": 309.228,
                  "y": 307.512
                },
                {
                  "x": 308.627,
                  "y": 307.563
                },
                {
                  "x": 308.18399999999997,
                  "y": 307.676
                },
                {
                  "x": 307.875,
                  "y": 307.875
                },
                {
                  "x": 307.676,
                  "y": 308.18399999999997
                },
                {
                  "x": 307.563,
                  "y": 308.627
                },
                {
                  "x": 307.512,
                  "y": 309.228
                },
                {
                  "x": 307.499,
                  "y": 310.011
                },
                {
                  "x": 307.5,
                  "y": 311.0
                }
              ]
            }
          ]
        },
        {
          "type": "go_straight",
          "startRoad": "road_3_2_2",
          "endRoad": "road_2_2_2",
          "direction": 2,
          "laneLinks": [
            {
              "startLaneIndex": 1,
              "endLaneIndex": 0,
              "points": [
                {
                  "x": 311.0,
                  "y": 304.5
                },
                {
                  "x": 309.592,
                  "y": 304.416
                },
                {
                  "x": 307.656,
                  "y": 304.188
                },
                {
                  "x": 305.324,
                  "y": 303.852
                },
                {
                  "x": 302.728,
                  "y": 303.444
                },
                {
                  "x": 300.0,
                  "y": 303.0
                },
                {
                  "x": 297.272,
                  "y": 302.556
                },
                {
                  "x": 294.676,
                  "y": 302.148
                },
                {
                  "x": 292.344,
                  "y": 301.812
                },
                {
                  "x": 290.408,
                  "y": 301.584
                },
                {
                  "x": 289.0,
                  "y": 301.5
                }
              ]
            },
            {
              "startLaneIndex": 1,
              "endLaneIndex": 1,
              "points": [
                {
                  "x": 311.0,
                  "y": 304.5
                },
                {
                  "x": 309.592,
                  "y": 304.5
                },
                {
                  "x": 307.656,
                  "y": 304.5
                },
                {
                  "x": 305.324,
                  "y": 304.5
                },
                {
                  "x": 302.728,
                  "y": 304.5
                },
                {
                  "x": 300.0,
                  "y": 304.5
                },
                {
                  "x": 297.272,
                  "y": 304.5
                },
                {
                  "x": 294.676,
                  "y": 304.5
                },
                {
                  "x": 292.344,
                  "y": 304.5
                },
                {
                  "x": 290.408,
                  "y": 304.5
                },
                {
                  "x": 289.0,
                  "y": 304.5
                }
              ]
            },
            {
              "startLaneIndex": 1,
              "endLaneIndex": 2,
              "points": [
                {
                  "x": 311.0,
                  "y": 304.5
                },
                {
                  "x": 309.592,
                  "y": 304.584
                },
                {
                  "x": 307.656,
                  "y": 304.812
                },
                {
                  "x": 305.324,
                  "y": 305.148
                },
                {
                  "x": 302.728,
                  "y": 305.556
                },
                {
                  "x": 300.0,
                  "y": 306.0
                },
                {
                  "x": 297.272,
                  "y": 306.444
                },
                {
                  "x": 294.676,
                  "y": 306.852
                },
                {
                  "x": 292.344,
                  "y": 307.188
                },
                {
                  "x": 290.408,
                  "y": 307.416
                },
                {
                  "x": 289.0,
                  "y": 307.5
                }
              ]
            }
          ]
        },
        {
          "type": "turn_left",
          "startRoad": "road_3_2_2",
          "endRoad": "road_2_2_3",
          "direction": 2,
          "laneLinks": [
            {
              "startLaneIndex": 0,
              "endLaneIndex": 0,
              "points": [
                {
                  "x": 311.0,
                  "y": 301.5
                },
                {
                  "x": 309.759,
                  "y": 301.249
                },
                {
                  "x": 308.292,
                  "y": 300.552
                },
                {
                  "x": 306.683,
                  "y": 299.493
                },
                {
                  "x": 305.016,
                  "y": 298.156
                },
                {
                  "x": 303.375,
                  "y": 296.625
                },
                {
                  "x": 301.844,
                  "y": 294.984
                },
                {
                  "x": 300.507,
                  "y": 293.317
                },
                {
                  "x": 299.448,
                  "y": 291.70799999999997
                },
                {
                  "x": 298.75100000000003,
                  "y": 290.241
                },
                {
                  "x": 298.5,
                  "y": 289.0
                }
              ]
            },
            {
              "startLaneIndex": 0,
              "endLaneIndex": 1,
              "points": [
                {
                  "x": 311.0,
                  "y": 301.5
                },
                {
                  "x": 309.675,
                  "y": 301.249
                },
                {
                  "x": 307.98,
                  "y": 300.552
                },
                {
                  "x": 306.03499999999997,
                  "y": 299.493
                },
                {
                  "x": 303.96,
                  "y": 298.156
                },
                {
                  "x": 301.875,
                  "y": 296.625
                },
                {
                  "x": 299.9,
                  "y": 294.984
                },
                {
                  "x": 298.155,
                  "y": 293.317
                },
                {
                  "x": 296.76,
                  "y": 291.70799999999997
                },
                {
                  "x": 295.83500000000004,
                  "y": 290.241
                },
                {
                  "x": 295.5,
                  "y": 289.0
                }
              ]
            },
            {
              "startLaneIndex": 0,
              "endLaneIndex": 2,
              "points": [
                {
                  "x": 311.0,
                  "y": 301.5
                },
                {
                  "x": 309.591,
                  "y": 301.249
                },
                {
                  "x": 307.668,
                  "y": 300.552
                },
                {
                  "x": 305.387,
                  "y": 299.493
                },
                {
                  "x": 302.904,
                  "y": 298.156
                },
                {
                  "x": 300.375,
                  "y": 296.625
                },
                {
                  "x": 297.956,
                  "y": 294.984
                },
                {
                  "x": 295.803,
                  "y": 293.317
                },
                {
                  "x": 294.072,
                  "y": 291.70799999999997
                },
                {
                  "x": 292.919,
                  "y": 290.241
                },
                {
                  "x": 292.5,
                  "y": 289.0
                }
              ]
            }
          ]
        },
        {
          "type": "turn_left",
          "startRoad": "road_2_3_3",
          "endRoad": "road_2_2_0",
          "direction": 3,
          "laneLinks": [
            {
              "startLaneIndex": 0,
              "endLaneIndex": 0,
              "points": [
                {
                  "x": 298.5,
                  "y": 311.0
                },
                {
                  "x": 298.751,
                  "y": 309.759
                },
                {
                  "x": 299.448,
                  "y": 308.292
                },
                {
                  "x": 300.507,
                  "y": 306.683
                },
                {
                  "x": 301.844,
                  "y": 305.016
                },
                {
                  "x": 303.375,
                  "y": 303.375
                },
                {
                  "x": 305.016,
                  "y": 301.844
                },
                {
                  "x": 306.683,
                  "y": 300.507
                },
                {
                  "x": 308.292,
                  "y": 299.448
                },
                {
                  "x": 309.759,
                  "y": 298.75100000000003
                },
                {
                  "x": 311.0,
                  "y": 298.5
                }
              ]
            },
            {
              "startLaneIndex": 0,
              "endLaneIndex": 1,
              "points": [
                {
                  "x": 298.5,
                  "y": 311.0
                },
                {
                  "x": 298.751,
                  "y": 309.675
                },
                {
                  "x": 299.448,
                  "y": 307.98
                },
                {
                  "x": 300.507,
                  "y": 306.03499999999997
                },
                {
                  "x": 301.844,
                  "y": 303.96
                },
                {
                  "x": 303.375,
                  "y": 301.875
                },
                {
                  "x": 305.016,
                  "y": 299.9
                },
                {
                  "x": 306.683,
                  "y": 298.155
                },
                {
                  "x": 308.292,
                  "y": 296.76
                },
                {
                  "x": 309.759,
                  "y": 295.83500000000004
                },
                {
                  "x": 311.0,
                  "y": 295.5
                }
              ]
            },
            {
              "startLaneIndex": 0,
              "endLaneIndex": 2,
              "points": [
                {
                  "x": 298.5,
                  "y": 311.0
                },
                {
                  "x": 298.751,
                  "y": 309.591
                },
                {
                  "x": 299.448,
                  "y": 307.668
                },
                {
                  "x": 300.507,
                  "y": 305.387
                },
                {
                  "x": 301.844,
                  "y": 302.904
                },
                {
                  "x": 303.375,
                  "y": 300.375
                },
                {
                  "x": 305.016,
                  "y": 297.956
                },
                {
                  "x": 306.683,
                  "y": 295.803
                },
                {
                  "x": 308.292,
                  "y": 294.072
                },
                {
                  "x": 309.759,
                  "y": 292.919
                },
                {
                  "x": 311.0,
                  "y": 292.5
                }
              ]
            }
          ]
        },
        {
          "type": "turn_right",
          "startRoad": "road_2_3_3",
          "endRoad": "road_2_2_2",
          "direction": 3,
          "laneLinks": [
            {
              "startLaneIndex": 2,
              "endLaneIndex": 0,
              "points": [
                {
                  "x": 292.5,
                  "y": 311.0
                },
                {
                  "x": 292.501,
                  "y": 309.843
                },
                {
                  "x": 292.488,
                  "y": 308.604
                },
                {
                  "x": 292.437,
                  "y": 307.331
                },
                {
                  "x": 292.324,
                  "y": 306.072
                },
                {
                  "x": 292.125,
                  "y": 304.875
                },
                {
                  "x": 291.816,
                  "y": 303.788
                },
                {
                  "x": 291.373,
                  "y": 302.859
                },
                {
                  "x": 290.772,
                  "y": 302.136
                },
                {
                  "x": 289.98900000000003,
                  "y": 301.66700000000003
                },
                {
                  "x": 289.0,
                  "y": 301.5
                }
              ]
            },
            {
              "startLaneIndex": 2,
              "endLaneIndex": 1,
              "points": [
                {
                  "x": 292.5,
                  "y": 311.0
                },
                {
                  "x": 292.501,
                  "y": 309.927
                },
                {
                  "x": 292.488,
                  "y": 308.916
                },
                {
                  "x": 292.437,
                  "y": 307.979
                },
                {
                  "x": 292.324,
                  "y": 307.128
                },
                {
                  "x": 292.125,
                  "y": 306.375
                },
                {
                  "x": 291.816,
                  "y": 305.73199999999997
                },
                {
                  "x": 291.373,
                  "y": 305.211
                },
                {
                  "x": 290.772,
                  "y": 304.824
                },
                {
                  "x": 289.98900000000003,
                  "y": 304.583
                },
                {
                  "x": 289.0,
                  "y": 304.5
                }
              ]
            },
            {
              "startLaneIndex": 2,
              "endLaneIndex": 2,
              "points": [
                {
                  "x": 292.5,
                  "y": 311.0
                },
                {
                  "x": 292.501,
                  "y": 310.011
                },
                {
                  "x": 292.488,
                  "y": 309.228
                },
                {
                  "x": 292.437,
                  "y": 308.627
                },
                {
                  "x": 292.324,
                  "y": 308.18399999999997
                },
                {
                  "x": 292.125,
                  "y": 307.875
                },
                {
                  "x": 291.816,
                  "y": 307.676
                },
                {
                  "x": 291.373,
                  "y": 307.563
                },
                {
                  "x": 290.772,
                  "y": 307.512
                },
                {
                  "x": 289.98900000000003,
                  "y": 307.499
                },
                {
                  "x": 289.0,
                  "y": 307.5
                }
              ]
            }
          ]
        },
        {
          "type": "go_straight",
          "startRoad": "road_2_3_3",
          "endRoad": "road_2_2_3",
          "direction": 3,
          "laneLinks": [
            {
              "startLaneIndex": 1,
              "endLaneIndex": 0,
              "points": [
                {
                  "x": 295.5,
                  "y": 311.0
                },
                {
                  "x": 295.584,
                  "y": 309.592
                },
                {
                  "x": 295.812,
                  "y": 307.656
                },
                {
                  "x": 296.148,
                  "y": 305.324
                },
                {
                  "x": 296.556,
                  "y": 302.728
                },
                {
                  "x": 297.0,
                  "y": 300.0
                },
                {
                  "x": 297.444,
                  "y": 297.272
                },
                {
                  "x": 297.852,
                  "y": 294.676
                },
                {
                  "x": 298.188,
                  "y": 292.344
                },
                {
                  "x": 298.416,
                  "y": 290.408
                },
                {
                  "x": 298.5,
                  "y": 289.0
                }
              ]
            },
            {
              "startLaneIndex": 1,
              "endLaneIndex": 1,
              "points": [
                {
                  "x": 295.5,
                  "y": 311.0
                },
                {
                  "x": 295.5,
                  "y": 309.592
                },
                {
                  "x": 295.5,
                  "y": 307.656
                },
                {
                  "x": 295.5,
                  "y": 305.324
                },
                {
                  "x": 295.5,
                  "y": 302.728
                },
                {
                  "x": 295.5,
                  "y": 300.0
                },
                {
                  "x": 295.5,
                  "y": 297.272
                },
                {
                  "x": 295.5,
                  "y": 294.676
                },
                {
                  "x": 295.5,
                  "y": 292.344
                },
                {
                  "x": 295.5,
                  "y": 290.408
                },
                {
                  "x": 295.5,
                  "y": 289.0
                }
              ]
            },
            {
              "startLaneIndex": 1,
              "endLaneIndex": 2,
              "points": [
                {
                  "x": 295.5,
                  "y": 311.0
                },
                {
                  "x": 295.416,
                  "y": 309.592
                },
                {
                  "x": 295.188,
                  "y": 307.656
                },
                {
                  "x": 294.852,
                  "y": 305.324
                },
                {
                  "x": 294.444,
                  "y": 302.728
                },
                {
                  "x": 294.0,
                  "y": 300.0
                },
                {
                  "x": 293.556,
                  "y": 297.272
                },
                {
                  "x": 293.148,
                  "y": 294.676
                },
                {
                  "x": 292.812,
                  "y": 292.344
                },
                {
                  "x": 292.584,
                  "y": 290.408
                },
                {
                  "x": 292.5,
                  "y": 289.0
                }
              ]
            }
          ]
        }
      ],
      "trafficLight": {
        "roadLinkIndices": [
          0,
          1,
          2,
          3,
          4,
          5,
          6,
          7,
          8,
          9,
          10,
          11
        ],
        "lightphases": [
          {
            "time": 5,
            "availableRoadLinks": [
              10,
              2,
              3,
              6
            ]
          },
          {
            "time": 30,
            "availableRoadLinks": [
              0,
              2,
              3,
              6,
              7,
              10
            ]
          },
          {
            "time": 30,
            "availableRoadLinks": [
              2,
              3,
              4,
              6,
              10,
              11
            ]
          },
          {
            "time": 30,
            "availableRoadLinks": [
              1,
              2,
              3,
              6,
              8,
              10
            ]
          },
          {
            "time": 30,
            "availableRoadLinks": [
              2,
              3,
              5,
              6,
              9,
              10
            ]
          },
          {
            "time": 30,
            "availableRoadLinks": [
              0,
              1,
              2,
              3,
              6,
              10
            ]
          },
          {
            "time": 30,
            "availableRoadLinks": [
              2,
              3,
              6,
              7,
              8,
              10
            ]
          },
          {
            "time": 30,
            "availableRoadLinks": [
              2,
              3,
              4,
              5,
              6,
              10
            ]
          },
          {
            "time": 30,
            "availableRoadLinks": [
              2,
              3,
              6,
              9,
              10,
              11
            ]
          }
        ]
      },
      "virtual": false
    },
    {
      "id": "intersection_2_3",
      "point": {
        "x": 300,
        "y": 600
      },
      "width": 11,
      "roads": [
        "road_1_3_0",
        "road_2_2_1",
        "road_3_3_2",
        "road_2_4_3",
        "road_2_3_0",
        "road_2_3_1",
        "road_2_3_2",
        "road_2_3_3"
      ],
      "roadLinks": [
        {
          "type": "go_straight",
          "startRoad": "road_1_3_0",
          "endRoad": "road_2_3_0",
          "direction": 0,
          "laneLinks": [
            {
              "startLaneIndex": 1,
              "endLaneIndex": 0,
              "points": [
                {
                  "x": 289.0,
                  "y": 595.5
                },
                {
                  "x": 290.408,
                  "y": 595.584
                },
                {
                  "x": 292.344,
                  "y": 595.812
                },
                {
                  "x": 294.676,
                  "y": 596.148
                },
                {
                  "x": 297.272,
                  "y": 596.556
                },
                {
                  "x": 300.0,
                  "y": 597.0
                },
                {
                  "x": 302.728,
                  "y": 597.444
                },
                {
                  "x": 305.324,
                  "y": 597.852
                },
                {
                  "x": 307.656,
                  "y": 598.1879999999999
                },
                {
                  "x": 309.592,
                  "y": 598.4159999999999
                },
                {
                  "x": 311.0,
                  "y": 598.5
                }
              ]
            },
            {
              "startLaneIndex": 1,
              "endLaneIndex": 1,
              "points": [
                {
                  "x": 289.0,
                  "y": 595.5
                },
                {
                  "x": 290.408,
                  "y": 595.5
                },
                {
                  "x": 292.344,
                  "y": 595.5
                },
                {
                  "x": 294.676,
                  "y": 595.5
                },
                {
                  "x": 297.272,
                  "y": 595.5
                },
                {
                  "x": 300.0,
                  "y": 595.5
                },
                {
                  "x": 302.728,
                  "y": 595.5
                },
                {
                  "x": 305.324,
                  "y": 595.5
                },
                {
                  "x": 307.656,
                  "y": 595.4999999999999
                },
                {
                  "x": 309.592,
                  "y": 595.5
                },
                {
                  "x": 311.0,
                  "y": 595.5
                }
              ]
            },
            {
              "startLaneIndex": 1,
              "endLaneIndex": 2,
              "points": [
                {
                  "x": 289.0,
                  "y": 595.5
                },
                {
                  "x": 290.408,
                  "y": 595.4159999999999
                },
                {
                  "x": 292.344,
                  "y": 595.188
                },
                {
                  "x": 294.676,
                  "y": 594.852
                },
                {
                  "x": 297.272,
                  "y": 594.444
                },
                {
                  "x": 300.0,
                  "y": 594.0
                },
                {
                  "x": 302.728,
                  "y": 593.556
                },
                {
                  "x": 305.324,
                  "y": 593.148
                },
                {
                  "x": 307.656,
                  "y": 592.8119999999999
                },
                {
                  "x": 309.592,
                  "y": 592.584
                },
                {
                  "x": 311.0,
                  "y": 592.5
                }
              ]
            }
          ]
        },
        {
          "type": "turn_left",
          "startRoad": "road_1_3_0",
          "endRoad": "road_2_3_1",
          "direction": 0,
          "laneLinks": [
            {
              "startLaneIndex": 0,
              "endLaneIndex": 0,
              "points": [
                {
                  "x": 289.0,
                  "y": 598.5
                },
                {
                  "x": 290.241,
                  "y": 598.751
                },
                {
                  "x": 291.70799999999997,
                  "y": 599.448
                },
                {
                  "x": 293.317,
                  "y": 600.507
                },
                {
                  "x": 294.984,
                  "y": 601.844
                },
                {
                  "x": 296.625,
                  "y": 603.375
                },
                {
                  "x": 298.156,
                  "y": 605.016
                },
                {
                  "x": 299.493,
                  "y": 606.683
                },
                {
                  "x": 300.552,
                  "y": 608.2919999999999
                },
                {
                  "x": 301.249,
                  "y": 609.759
                },
                {
                  "x": 301.5,
                  "y": 611.0
                }
              ]
            },
            {
              "startLaneIndex": 0,
              "endLaneIndex": 1,
              "points": [
                {
                  "x": 289.0,
                  "y": 598.5
                },
                {
                  "x": 290.325,
                  "y": 598.751
                },
                {
                  "x": 292.02,
                  "y": 599.448
                },
                {
                  "x": 293.965,
                  "y": 600.507
                },
                {
                  "x": 296.04,
                  "y": 601.844
                },
                {
                  "x": 298.125,
                  "y": 603.375
                },
                {
                  "x": 300.1,
                  "y": 605.016
                },
                {
                  "x": 301.845,
                  "y": 606.683
                },
                {
                  "x": 303.24,
                  "y": 608.2919999999999
                },
                {
                  "x": 304.165,
                  "y": 609.759
                },
                {
                  "x": 304.5,
                  "y": 611.0
                }
              ]
            },
            {
              "startLaneIndex": 0,
              "endLaneIndex": 2,
              "points": [
                {
                  "x": 289.0,
                  "y": 598.5
                },
                {
                  "x": 290.409,
                  "y": 598.751
                },
                {
                  "x": 292.332,
                  "y": 599.448
                },
                {
                  "x": 294.613,
                  "y": 600.507
                },
                {
                  "x": 297.096,
                  "y": 601.844
                },
                {
                  "x": 299.625,
                  "y": 603.375
                },
                {
                  "x": 302.044,
                  "y": 605.016
                },
                {
                  "x": 304.197,
                  "y": 606.683
                },
                {
                  "x": 305.928,
                  "y": 608.2919999999999
                },
                {
                  "x": 307.081,
                  "y": 609.759
                },
                {
                  "x": 307.5,
                  "y": 611.0
                }
              ]
            }
          ]
        },
        {
          "type": "turn_right",
          "startRoad": "road_1_3_0",
          "endRoad": "road_2_3_3",
          "direction": 0,
          "laneLinks": [
            {
              "startLaneIndex": 2,
              "endLaneIndex": 0,
              "points": [
                {
                  "x": 289.0,
                  "y": 592.5
                },
                {
                  "x": 290.157,
                  "y": 592.501
                },
                {
                  "x": 291.396,
                  "y": 592.488
                },
                {
                  "x": 292.669,
                  "y": 592.437
                },
                {
                  "x": 293.928,
                  "y": 592.324
                },
                {
                  "x": 295.125,
                  "y": 592.125
                },
                {
                  "x": 296.212,
                  "y": 591.816
                },
                {
                  "x": 297.141,
                  "y": 591.373
                },
                {
                  "x": 297.864,
                  "y": 590.7719999999999
                },
                {
                  "x": 298.333,
                  "y": 589.989
                },
                {
                  "x": 298.5,
                  "y": 589.0
                }
              ]
            },
            {
              "startLaneIndex": 2,
              "endLaneIndex": 1,
              "points": [
                {
                  "x": 289.0,
                  "y": 592.5
                },
                {
                  "x": 290.073,
                  "y": 592.501
                },
                {
                  "x": 291.084,
                  "y": 592.488
                },
                {
                  "x": 292.021,
                  "y": 592.437
                },
                {
                  "x": 292.872,
                  "y": 592.324
                },
                {
                  "x": 293.625,
                  "y": 592.125
                },
                {
                  "x": 294.268,
                  "y": 591.816
                },
                {
                  "x": 294.789,
                  "y": 591.373
                },
                {
                  "x": 295.176,
                  "y": 590.7719999999999
                },
                {
                  "x": 295.41700000000003,
                  "y": 589.989
                },
                {
                  "x": 295.5,
                  "y": 589.0
                }
              ]
            },
            {
              "startLaneIndex": 2,
              "endLaneIndex": 2,
              "points": [
                {
                  "x": 289.0,
                  "y": 592.5
                },
                {
                  "x": 289.989,
                  "y": 592.501
                },
                {
                  "x": 290.772,
                  "y": 592.488
                },
                {
                  "x": 291.373,
                  "y": 592.437
                },
                {
                  "x": 291.816,
                  "y": 592.324
                },
                {
                  "x": 292.125,
                  "y": 592.125
                },
                {
                  "x": 292.324,
                  "y": 591.816
                },
                {
                  "x": 292.437,
                  "y": 591.373
                },
                {
                  "x": 292.488,
                  "y": 590.7719999999999
                },
                {
                  "x": 292.50100000000003,
                  "y": 589.989
                },
                {
                  "x": 292.5,
                  "y": 589.0
                }
              ]
            }
          ]
        },
        {
          "type": "turn_right",
          "startRoad": "road_2_2_1",
          "endRoad": "road_2_3_0",
          "direction": 1,
          "laneLinks": [
            {
              "startLaneIndex": 2,
              "endLaneIndex": 0,
              "points": [
                {
                  "x": 307.5,
                  "y": 589.0
                },
                {
                  "x": 307.499,
                  "y": 590.157
                },
                {
                  "x": 307.512,
                  "y": 591.396
                },
                {
                  "x": 307.563,
                  "y": 592.669
                },
                {
                  "x": 307.676,
                  "y": 593.928
                },
                {
                  "x": 307.875,
                  "y": 595.125
                },
                {
                  "x": 308.18399999999997,
                  "y": 596.212
                },
                {
                  "x": 308.627,
                  "y": 597.141
                },
                {
                  "x": 309.228,
                  "y": 597.8639999999999
                },
                {
                  "x": 310.011,
                  "y": 598.333
                },
                {
                  "x": 311.0,
                  "y": 598.5
                }
              ]
            },
            {
              "startLaneIndex": 2,
              "endLaneIndex": 1,
              "points": [
                {
                  "x": 307.5,
                  "y": 589.0
                },
                {
                  "x": 307.499,
                  "y": 590.073
                },
                {
                  "x": 307.512,
                  "y": 591.084
                },
                {
                  "x": 307.563,
                  "y": 592.021
                },
                {
                  "x": 307.676,
                  "y": 592.872
                },
                {
                  "x": 307.875,
                  "y": 593.625
                },
                {
                  "x": 308.18399999999997,
                  "y": 594.268
                },
                {
                  "x": 308.627,
                  "y": 594.789
                },
                {
                  "x": 309.228,
                  "y": 595.1759999999999
                },
                {
                  "x": 310.011,
                  "y": 595.417
                },
                {
                  "x": 311.0,
                  "y": 595.5
                }
              ]
            },
            {
              "startLaneIndex": 2,
              "endLaneIndex": 2,
              "points": [
                {
                  "x": 307.5,
                  "y": 589.0
                },
                {
                  "x": 307.499,
                  "y": 589.989
                },
                {
                  "x": 307.512,
                  "y": 590.772
                },
                {
                  "x": 307.563,
                  "y": 591.373
                },
                {
                  "x": 307.676,
                  "y": 591.816
                },
                {
                  "x": 307.875,
                  "y": 592.125
                },
                {
                  "x": 308.18399999999997,
                  "y": 592.324
                },
                {
                  "x": 308.627,
                  "y": 592.437
                },
                {
                  "x": 309.228,
                  "y": 592.4879999999999
                },
                {
                  "x": 310.011,
                  "y": 592.501
                },
                {
                  "x": 311.0,
                  "y": 592.5
                }
              ]
            }
          ]
        },
        {
          "type": "go_straight",
          "startRoad": "road_2_2_1",
          "endRoad": "road_2_3_1",
          "direction": 1,
          "laneLinks": [
            {
              "startLaneIndex": 1,
              "endLaneIndex": 0,
              "points": [
                {
                  "x": 304.5,
                  "y": 589.0
                },
                {
                  "x": 304.416,
                  "y": 590.408
                },
                {
                  "x": 304.188,
                  "y": 592.344
                },
                {
                  "x": 303.852,
                  "y": 594.676
                },
                {
                  "x": 303.444,
                  "y": 597.272
                },
                {
                  "x": 303.0,
                  "y": 600.0
                },
                {
                  "x": 302.556,
                  "y": 602.728
                },
                {
                  "x": 302.148,
                  "y": 605.324
                },
                {
                  "x": 301.812,
                  "y": 607.656
                },
                {
                  "x": 301.584,
                  "y": 609.592
                },
                {
                  "x": 301.5,
                  "y": 611.0
                }
              ]
            },
            {
              "startLaneIndex": 1,
              "endLaneIndex": 1,
              "points": [
                {
                  "x": 304.5,
                  "y": 589.0
                },
                {
                  "x": 304.5,
                  "y": 590.408
                },
                {
                  "x": 304.5,
                  "y": 592.344
                },
                {
                  "x": 304.5,
                  "y": 594.676
                },
                {
                  "x": 304.5,
                  "y": 597.272
                },
                {
                  "x": 304.5,
                  "y": 600.0
                },
                {
                  "x": 304.5,
                  "y": 602.728
                },
                {
                  "x": 304.5,
                  "y": 605.324
                },
                {
                  "x": 304.5,
                  "y": 607.656
                },
                {
                  "x": 304.5,
                  "y": 609.592
                },
                {
                  "x": 304.5,
                  "y": 611.0
                }
              ]
            },
            {
              "startLaneIndex": 1,
              "endLaneIndex": 2,
              "points": [
                {
                  "x": 304.5,
                  "y": 589.0
                },
                {
                  "x": 304.584,
                  "y": 590.408
                },
                {
                  "x": 304.812,
                  "y": 592.344
                },
                {
                  "x": 305.148,
                  "y": 594.676
                },
                {
                  "x": 305.556,
                  "y": 597.272
                },
                {
                  "x": 306.0,
                  "y": 600.0
                },
                {
                  "x": 306.444,
                  "y": 602.728
                },
                {
                  "x": 306.852,
                  "y": 605.324
                },
                {
                  "x": 307.188,
                  "y": 607.656
                },
                {
                  "x": 307.416,
                  "y": 609.592
                },
                {
                  "x": 307.5,
                  "y": 611.0
                }
              ]
            }
          ]
        },
        {
          "type": "turn_left",
          "startRoad": "road_2_2_1",
          "endRoad": "road_2_3_2",
          "direction": 1,
          "laneLinks": [
            {
              "startLaneIndex": 0,
              "endLaneIndex": 0,
              "points": [
                {
                  "x": 301.5,
                  "y": 589.0
                },
                {
                  "x": 301.249,
                  "y": 590.241
                },
                {
                  "x": 300.552,
                  "y": 591.708
                },
                {
                  "x": 299.493,
                  "y": 593.317
                },
                {
                  "x": 298.156,
                  "y": 594.984
                },
                {
                  "x": 296.625,
                  "y": 596.625
                },
                {
                  "x": 294.984,
                  "y": 598.156
                },
                {
                  "x": 293.317,
                  "y": 599.4929999999999
                },
                {
                  "x": 291.70799999999997,
                  "y": 600.5519999999999
                },
                {
                  "x": 290.241,
                  "y": 601.249
                },
                {
                  "x": 289.0,
                  "y": 601.5
                }
              ]
            },
            {
              "startLaneIndex": 0,
              "endLaneIndex": 1,
              "points": [
                {
                  "x": 301.5,
                  "y": 589.0
                },
                {
                  "x": 301.249,
                  "y": 590.325
                },
                {
                  "x": 300.552,
                  "y": 592.02
                },
                {
                  "x": 299.493,
                  "y": 593.965
                },
                {
                  "x": 298.156,
                  "y": 596.04
                },
                {
                  "x": 296.625,
                  "y": 598.125
                },
                {
                  "x": 294.984,
                  "y": 600.1
                },
                {
                  "x": 293.317,
                  "y": 601.845
                },
                {
                  "x": 291.70799999999997,
                  "y": 603.2399999999999
                },
                {
                  "x": 290.241,
                  "y": 604.165
                },
                {
                  "x": 289.0,
                  "y": 604.5
                }
              ]
            },
            {
              "startLaneIndex": 0,
              "endLaneIndex": 2,
              "points": [
                {
                  "x": 301.5,
                  "y": 589.0
                },
                {
                  "x": 301.249,
                  "y": 590.409
                },
                {
                  "x": 300.552,
                  "y": 592.332
                },
                {
                  "x": 299.493,
                  "y": 594.613
                },
                {
                  "x": 298.156,
                  "y": 597.096
                },
                {
                  "x": 296.625,
                  "y": 599.625
                },
                {
                  "x": 294.984,
                  "y": 602.044
                },
                {
                  "x": 293.317,
                  "y": 604.197
                },
                {
                  "x": 291.70799999999997,
                  "y": 605.9279999999999
                },
                {
                  "x": 290.241,
                  "y": 607.081
                },
                {
                  "x": 289.0,
                  "y": 607.5
                }
              ]
            }
          ]
        },
        {
          "type": "turn_right",
          "startRoad": "road_3_3_2",
          "endRoad": "road_2_3_1",
          "direction": 2,
          "laneLinks": [
            {
              "startLaneIndex": 2,
              "endLaneIndex": 0,
              "points": [
                {
                  "x": 311.0,
                  "y": 607.5
                },
                {
                  "x": 309.843,
                  "y": 607.499
                },
                {
                  "x": 308.604,
                  "y": 607.512
                },
                {
                  "x": 307.331,
                  "y": 607.563
                },
                {
                  "x": 306.072,
                  "y": 607.676
                },
                {
                  "x": 304.875,
                  "y": 607.875
                },
                {
                  "x": 303.788,
                  "y": 608.184
                },
                {
                  "x": 302.859,
                  "y": 608.627
                },
                {
                  "x": 302.136,
                  "y": 609.2279999999998
                },
                {
                  "x": 301.66700000000003,
                  "y": 610.011
                },
                {
                  "x": 301.5,
                  "y": 611.0
                }
              ]
            },
            {
              "startLaneIndex": 2,
              "endLaneIndex": 1,
              "points": [
                {
                  "x": 311.0,
                  "y": 607.5
                },
                {
                  "x": 309.927,
                  "y": 607.499
                },
                {
                  "x": 308.916,
                  "y": 607.512
                },
                {
                  "x": 307.979,
                  "y": 607.563
                },
                {
                  "x": 307.128,
                  "y": 607.676
                },
                {
                  "x": 306.375,
                  "y": 607.875
                },
                {
                  "x": 305.73199999999997,
                  "y": 608.184
                },
                {
                  "x": 305.211,
                  "y": 608.627
                },
                {
                  "x": 304.824,
                  "y": 609.2279999999998
                },
                {
                  "x": 304.583,
                  "y": 610.011
                },
                {
                  "x": 304.5,
                  "y": 611.0
                }
              ]
            },
            {
              "startLaneIndex": 2,
              "endLaneIndex": 2,
              "points": [
                {
                  "x": 311.0,
                  "y": 607.5
                },
                {
                  "x": 310.011,
                  "y": 607.499
                },
                {
                  "x": 309.228,
                  "y": 607.512
                },
                {
                  "x": 308.627,
                  "y": 607.563
                },
                {
                  "x": 308.18399999999997,
                  "y": 607.676
                },
                {
                  "x": 307.875,
                  "y": 607.875
                },
                {
                  "x": 307.676,
                  "y": 608.184
                },
                {
                  "x": 307.563,
                  "y": 608.627
                },
                {
                  "x": 307.512,
                  "y": 609.2279999999998
                },
                {
                  "x": 307.499,
                  "y": 610.011
                },
                {
                  "x": 307.5,
                  "y": 611.0
                }
              ]
            }
          ]
        },
        {
          "type": "go_straight",
          "startRoad": "road_3_3_2",
          "endRoad": "road_2_3_2",
          "direction": 2,
          "laneLinks": [
            {
              "startLaneIndex": 1,
              "endLaneIndex": 0,
              "points": [
                {
                  "x": 311.0,
                  "y": 604.5
                },
                {
                  "x": 309.592,
                  "y": 604.4159999999999
                },
                {
                  "x": 307.656,
                  "y": 604.188
                },
                {
                  "x": 305.324,
                  "y": 603.852
                },
                {
                  "x": 302.728,
                  "y": 603.444
                },
                {
                  "x": 300.0,
                  "y": 603.0
                },
                {
                  "x": 297.272,
                  "y": 602.556
                },
                {
                  "x": 294.676,
                  "y": 602.148
                },
                {
                  "x": 292.344,
                  "y": 601.8119999999999
                },
                {
                  "x": 290.408,
                  "y": 601.584
                },
                {
                  "x": 289.0,
                  "y": 601.5
                }
              ]
            },
            {
              "startLaneIndex": 1,
              "endLaneIndex": 1,
              "points": [
                {
                  "x": 311.0,
                  "y": 604.5
                },
                {
                  "x": 309.592,
                  "y": 604.5
                },
                {
                  "x": 307.656,
                  "y": 604.5
                },
                {
                  "x": 305.324,
                  "y": 604.5
                },
                {
                  "x": 302.728,
                  "y": 604.5
                },
                {
                  "x": 300.0,
                  "y": 604.5
                },
                {
                  "x": 297.272,
                  "y": 604.5
                },
                {
                  "x": 294.676,
                  "y": 604.5
                },
                {
                  "x": 292.344,
                  "y": 604.4999999999999
                },
                {
                  "x": 290.408,
                  "y": 604.5
                },
                {
                  "x": 289.0,
                  "y": 604.5
                }
              ]
            },
            {
              "startLaneIndex": 1,
              "endLaneIndex": 2,
              "points": [
                {
                  "x": 311.0,
                  "y": 604.5
                },
                {
                  "x": 309.592,
                  "y": 604.584
                },
                {
                  "x": 307.656,
                  "y": 604.812
                },
                {
                  "x": 305.324,
                  "y": 605.148
                },
                {
                  "x": 302.728,
                  "y": 605.556
                },
                {
                  "x": 300.0,
                  "y": 606.0
                },
                {
                  "x": 297.272,
                  "y": 606.444
                },
                {
                  "x": 294.676,
                  "y": 606.852
                },
                {
                  "x": 292.344,
                  "y": 607.1879999999999
                },
                {
                  "x": 290.408,
                  "y": 607.4159999999999
                },
                {
                  "x": 289.0,
                  "y": 607.5
                }
              ]
            }
          ]
        },
        {
          "type": "turn_left",
          "startRoad": "road_3_3_2",
          "endRoad": "road_2_3_3",
          "direction": 2,
          "laneLinks": [
            {
              "startLaneIndex": 0,
              "endLaneIndex": 0,
              "points": [
                {
                  "x": 311.0,
                  "y": 601.5
                },
                {
                  "x": 309.759,
                  "y": 601.249
                },
                {
                  "x": 308.292,
                  "y": 600.552
                },
                {
                  "x": 306.683,
                  "y": 599.4929999999999
                },
                {
                  "x": 305.016,
                  "y": 598.156
                },
                {
                  "x": 303.375,
                  "y": 596.625
                },
                {
                  "x": 301.844,
                  "y": 594.984
                },
                {
                  "x": 300.507,
                  "y": 593.317
                },
                {
                  "x": 299.448,
                  "y": 591.7079999999999
                },
                {
                  "x": 298.75100000000003,
                  "y": 590.241
                },
                {
                  "x": 298.5,
                  "y": 589.0
                }
              ]
            },
            {
              "startLaneIndex": 0,
              "endLaneIndex": 1,
              "points": [
                {
                  "x": 311.0,
                  "y": 601.5
                },
                {
                  "x": 309.675,
                  "y": 601.249
                },
                {
                  "x": 307.98,
                  "y": 600.552
                },
                {
                  "x": 306.03499999999997,
                  "y": 599.4929999999999
                },
                {
                  "x": 303.96,
                  "y": 598.156
                },
                {
                  "x": 301.875,
                  "y": 596.625
                },
                {
                  "x": 299.9,
                  "y": 594.984
                },
                {
                  "x": 298.155,
                  "y": 593.317
                },
                {
                  "x": 296.76,
                  "y": 591.7079999999999
                },
                {
                  "x": 295.83500000000004,
                  "y": 590.241
                },
                {
                  "x": 295.5,
                  "y": 589.0
                }
              ]
            },
            {
              "startLaneIndex": 0,
              "endLaneIndex": 2,
              "points": [
                {
                  "x": 311.0,
                  "y": 601.5
                },
                {
                  "x": 309.591,
                  "y": 601.249
                },
                {
                  "x": 307.668,
                  "y": 600.552
                },
                {
                  "x": 305.387,
                  "y": 599.4929999999999
                },
                {
                  "x": 302.904,
                  "y": 598.156
                },
                {
                  "x": 300.375,
                  "y": 596.625
                },
                {
                  "x": 297.956,
                  "y": 594.984
                },
                {
                  "x": 295.803,
                  "y": 593.317
                },
                {
                  "x": 294.072,
                  "y": 591.7079999999999
                },
                {
                  "x": 292.919,
                  "y": 590.241
                },
                {
                  "x": 292.5,
                  "y": 589.0
                }
              ]
            }
          ]
        },
        {
          "type": "turn_left",
          "startRoad": "road_2_4_3",
          "endRoad": "road_2_3_0",
          "direction": 3,
          "laneLinks": [
            {
              "startLaneIndex": 0,
              "endLaneIndex": 0,
              "points": [
                {
                  "x": 298.5,
                  "y": 611.0
                },
                {
                  "x": 298.751,
                  "y": 609.759
                },
                {
                  "x": 299.448,
                  "y": 608.292
                },
                {
                  "x": 300.507,
                  "y": 606.683
                },
                {
                  "x": 301.844,
                  "y": 605.016
                },
                {
                  "x": 303.375,
                  "y": 603.375
                },
                {
                  "x": 305.016,
                  "y": 601.844
                },
                {
                  "x": 306.683,
                  "y": 600.507
                },
                {
                  "x": 308.292,
                  "y": 599.4479999999999
                },
                {
                  "x": 309.759,
                  "y": 598.751
                },
                {
                  "x": 311.0,
                  "y": 598.5
                }
              ]
            },
            {
              "startLaneIndex": 0,
              "endLaneIndex": 1,
              "points": [
                {
                  "x": 298.5,
                  "y": 611.0
                },
                {
                  "x": 298.751,
                  "y": 609.675
                },
                {
                  "x": 299.448,
                  "y": 607.98
                },
                {
                  "x": 300.507,
                  "y": 606.035
                },
                {
                  "x": 301.844,
                  "y": 603.96
                },
                {
                  "x": 303.375,
                  "y": 601.875
                },
                {
                  "x": 305.016,
                  "y": 599.9
                },
                {
                  "x": 306.683,
                  "y": 598.155
                },
                {
                  "x": 308.292,
                  "y": 596.7599999999999
                },
                {
                  "x": 309.759,
                  "y": 595.835
                },
                {
                  "x": 311.0,
                  "y": 595.5
                }
              ]
            },
            {
              "startLaneIndex": 0,
              "endLaneIndex": 2,
              "points": [
                {
                  "x": 298.5,
                  "y": 611.0
                },
                {
                  "x": 298.751,
                  "y": 609.591
                },
                {
                  "x": 299.448,
                  "y": 607.668
                },
                {
                  "x": 300.507,
                  "y": 605.387
                },
                {
                  "x": 301.844,
                  "y": 602.904
                },
                {
                  "x": 303.375,
                  "y": 600.375
                },
                {
                  "x": 305.016,
                  "y": 597.956
                },
                {
                  "x": 306.683,
                  "y": 595.803
                },
                {
                  "x": 308.292,
                  "y": 594.0719999999999
                },
                {
                  "x": 309.759,
                  "y": 592.919
                },
                {
                  "x": 311.0,
                  "y": 592.5
                }
              ]
            }
          ]
        },
        {
          "type": "turn_right",
          "startRoad": "road_2_4_3",
          "endRoad": "road_2_3_2",
          "direction": 3,
          "laneLinks": [
            {
              "startLaneIndex": 2,
              "endLaneIndex": 0,
              "points": [
                {
                  "x": 292.5,
                  "y": 611.0
                },
                {
                  "x": 292.501,
                  "y": 609.843
                },
                {
                  "x": 292.488,
                  "y": 608.604
                },
                {
                  "x": 292.437,
                  "y": 607.331
                },
                {
                  "x": 292.324,
                  "y": 606.072
                },
                {
                  "x": 292.125,
                  "y": 604.875
                },
                {
                  "x": 291.816,
                  "y": 603.788
                },
                {
                  "x": 291.373,
                  "y": 602.859
                },
                {
                  "x": 290.772,
                  "y": 602.1359999999999
                },
                {
                  "x": 289.98900000000003,
                  "y": 601.667
                },
                {
                  "x": 289.0,
                  "y": 601.5
                }
              ]
            },
            {
              "startLaneIndex": 2,
              "endLaneIndex": 1,
              "points": [
                {
                  "x": 292.5,
                  "y": 611.0
                },
                {
                  "x": 292.501,
                  "y": 609.927
                },
                {
                  "x": 292.488,
                  "y": 608.9159999999999
                },
                {
                  "x": 292.437,
                  "y": 607.979
                },
                {
                  "x": 292.324,
                  "y": 607.128
                },
                {
                  "x": 292.125,
                  "y": 606.375
                },
                {
                  "x": 291.816,
                  "y": 605.732
                },
                {
                  "x": 291.373,
                  "y": 605.211
                },
                {
                  "x": 290.772,
                  "y": 604.8239999999998
                },
                {
                  "x": 289.98900000000003,
                  "y": 604.583
                },
                {
                  "x": 289.0,
                  "y": 604.5
                }
              ]
            },
            {
              "startLaneIndex": 2,
              "endLaneIndex": 2,
              "points": [
                {
                  "x": 292.5,
                  "y": 611.0
                },
                {
                  "x": 292.501,
                  "y": 610.011
                },
                {
                  "x": 292.488,
                  "y": 609.228
                },
                {
                  "x": 292.437,
                  "y": 608.627
                },
                {
                  "x": 292.324,
                  "y": 608.184
                },
                {
                  "x": 292.125,
                  "y": 607.875
                },
                {
                  "x": 291.816,
                  "y": 607.676
                },
                {
                  "x": 291.373,
                  "y": 607.563
                },
                {
                  "x": 290.772,
                  "y": 607.512
                },
                {
                  "x": 289.98900000000003,
                  "y": 607.499
                },
                {
                  "x": 289.0,
                  "y": 607.5
                }
              ]
            }
          ]
        },
        {
          "type": "go_straight",
          "startRoad": "road_2_4_3",
          "endRoad": "road_2_3_3",
          "direction": 3,
          "laneLinks": [
            {
              "startLaneIndex": 1,
              "endLaneIndex": 0,
              "points": [
                {
                  "x": 295.5,
                  "y": 611.0
                },
                {
                  "x": 295.584,
                  "y": 609.592
                },
                {
                  "x": 295.812,
                  "y": 607.656
                },
                {
                  "x": 296.148,
                  "y": 605.324
                },
                {
                  "x": 296.556,
                  "y": 602.728
                },
                {
                  "x": 297.0,
                  "y": 600.0
                },
                {
                  "x": 297.444,
                  "y": 597.272
                },
                {
                  "x": 297.852,
                  "y": 594.676
                },
                {
                  "x": 298.188,
                  "y": 592.3439999999999
                },
                {
                  "x": 298.416,
                  "y": 590.408
                },
                {
                  "x": 298.5,
                  "y": 589.0
                }
              ]
            },
            {
              "startLaneIndex": 1,
              "endLaneIndex": 1,
              "points": [
                {
                  "x": 295.5,
                  "y": 611.0
                },
                {
                  "x": 295.5,
                  "y": 609.592
                },
                {
                  "x": 295.5,
                  "y": 607.656
                },
                {
                  "x": 295.5,
                  "y": 605.324
                },
                {
                  "x": 295.5,
                  "y": 602.728
                },
                {
                  "x": 295.5,
                  "y": 600.0
                },
                {
                  "x": 295.5,
                  "y": 597.272
                },
                {
                  "x": 295.5,
                  "y": 594.676
                },
                {
                  "x": 295.5,
                  "y": 592.3439999999999
                },
                {
                  "x": 295.5,
                  "y": 590.408
                },
                {
                  "x": 295.5,
                  "y": 589.0
                }
              ]
            },
            {
              "startLaneIndex": 1,
              "endLaneIndex": 2,
              "points": [
                {
                  "x": 295.5,
                  "y": 611.0
                },
                {
                  "x": 295.416,
                  "y": 609.592
                },
                {
                  "x": 295.188,
                  "y": 607.656
                },
                {
                  "x": 294.852,
                  "y": 605.324
                },
                {
                  "x": 294.444,
                  "y": 602.728
                },
                {
                  "x": 294.0,
                  "y": 600.0
                },
                {
                  "x": 293.556,
                  "y": 597.272
                },
                {
                  "x": 293.148,
                  "y": 594.676
                },
                {
                  "x": 292.812,
                  "y": 592.3439999999999
                },
                {
                  "x": 292.584,
                  "y": 590.408
                },
                {
                  "x": 292.5,
                  "y": 589.0
                }
              ]
            }
          ]
        }
      ],
      "trafficLight": {
        "roadLinkIndices": [
          0,
          1,
          2,
          3,
          4,
          5,
          6,
          7,
          8,
          9,
          10,
          11
        ],
        "lightphases": [
          {
            "time": 5,
            "availableRoadLinks": [
              10,
              2,
              3,
              6
            ]
          },
          {
            "time": 30,
            "availableRoadLinks": [
              0,
              2,
              3,
              6,
              7,
              10
            ]
          },
          {
            "time": 30,
            "availableRoadLinks": [
              2,
              3,
              4,
              6,
              10,
              11
            ]
          },
          {
            "time": 30,
            "availableRoadLinks": [
              1,
              2,
              3,
              6,
              8,
              10
            ]
          },
          {
            "time": 30,
            "availableRoadLinks": [
              2,
              3,
              5,
              6,
              9,
              10
            ]
          },
          {
            "time": 30,
            "availableRoadLinks": [
              0,
              1,
              2,
              3,
              6,
              10
            ]
          },
          {
            "time": 30,
            "availableRoadLinks": [
              2,
              3,
              6,
              7,
              8,
              10
            ]
          },
          {
            "time": 30,
            "availableRoadLinks": [
              2,
              3,
              4,
              5,
              6,
              10
            ]
          },
          {
            "time": 30,
            "availableRoadLinks": [
              2,
              3,
              6,
              9,
              10,
              11
            ]
          }
        ]
      },
      "virtual": false
    },
    {
      "id": "intersection_2_4",
      "point": {
        "x": 300,
        "y": 900
      },
      "width": 0,
      "roads": [
        "road_2_3_1",
        "road_2_4_3"
      ],
      "roadLinks": [],
      "trafficLight": {
        "roadLinkIndices": [],
        "lightphases": [
          {
            "time": 5,
            "availableRoadLinks": []
          },
          {
            "time": 30,
            "availableRoadLinks": []
          },
          {
            "time": 30,
            "availableRoadLinks": []
          },
          {
            "time": 30,
            "availableRoadLinks": []
          },
          {
            "time": 30,
            "availableRoadLinks": []
          },
          {
            "time": 30,
            "availableRoadLinks": []
          },
          {
            "time": 30,
            "availableRoadLinks": []
          },
          {
            "time": 30,
            "availableRoadLinks": []
          },
          {
            "time": 30,
            "availableRoadLinks": []
          }
        ]
      },
      "virtual": true
    },
    {
      "id": "intersection_3_0",
      "point": {
        "x": 600,
        "y": -300
      },
      "width": 0,
      "roads": [
        "road_3_1_3",
        "road_3_0_1"
      ],
      "roadLinks": [],
      "trafficLight": {
        "roadLinkIndices": [],
        "lightphases": [
          {
            "time": 5,
            "availableRoadLinks": []
          },
          {
            "time": 30,
            "availableRoadLinks": []
          },
          {
            "time": 30,
            "availableRoadLinks": []
          },
          {
            "time": 30,
            "availableRoadLinks": []
          },
          {
            "time": 30,
            "availableRoadLinks": []
          },
          {
            "time": 30,
            "availableRoadLinks": []
          },
          {
            "time": 30,
            "availableRoadLinks": []
          },
          {
            "time": 30,
            "availableRoadLinks": []
          },
          {
            "time": 30,
            "availableRoadLinks": []
          }
        ]
      },
      "virtual": true
    },
    {
      "id": "intersection_3_1",
      "point": {
        "x": 600,
        "y": 0
      },
      "width": 11,
      "roads": [
        "road_2_1_0",
        "road_3_0_1",
        "road_4_1_2",
        "road_3_2_3",
        "road_3_1_0",
        "road_3_1_1",
        "road_3_1_2",
        "road_3_1_3"
      ],
      "roadLinks": [
        {
          "type": "go_straight",
          "startRoad": "road_2_1_0",
          "endRoad": "road_3_1_0",
          "direction": 0,
          "laneLinks": [
            {
              "startLaneIndex": 1,
              "endLaneIndex": 0,
              "points": [
                {
                  "x": 589.0,
                  "y": -4.5
                },
                {
                  "x": 590.408,
                  "y": -4.416
                },
                {
                  "x": 592.344,
                  "y": -4.188
                },
                {
                  "x": 594.676,
                  "y": -3.852
                },
                {
                  "x": 597.272,
                  "y": -3.444
                },
                {
                  "x": 600.0,
                  "y": -3.0
                },
                {
                  "x": 602.728,
                  "y": -2.556
                },
                {
                  "x": 605.324,
                  "y": -2.148
                },
                {
                  "x": 607.656,
                  "y": -1.811999999999999
                },
                {
                  "x": 609.592,
                  "y": -1.584
                },
                {
                  "x": 611.0,
                  "y": -1.5
                }
              ]
            },
            {
              "startLaneIndex": 1,
              "endLaneIndex": 1,
              "points": [
                {
                  "x": 589.0,
                  "y": -4.5
                },
                {
                  "x": 590.408,
                  "y": -4.5
                },
                {
                  "x": 592.344,
                  "y": -4.5
                },
                {
                  "x": 594.676,
                  "y": -4.5
                },
                {
                  "x": 597.272,
                  "y": -4.5
                },
                {
                  "x": 600.0,
                  "y": -4.5
                },
                {
                  "x": 602.728,
                  "y": -4.5
                },
                {
                  "x": 605.324,
                  "y": -4.5
                },
                {
                  "x": 607.656,
                  "y": -4.499999999999999
                },
                {
                  "x": 609.592,
                  "y": -4.5
                },
                {
                  "x": 611.0,
                  "y": -4.5
                }
              ]
            },
            {
              "startLaneIndex": 1,
              "endLaneIndex": 2,
              "points": [
                {
                  "x": 589.0,
                  "y": -4.5
                },
                {
                  "x": 590.408,
                  "y": -4.584
                },
                {
                  "x": 592.344,
                  "y": -4.812
                },
                {
                  "x": 594.676,
                  "y": -5.148
                },
                {
                  "x": 597.272,
                  "y": -5.556
                },
                {
                  "x": 600.0,
                  "y": -6.0
                },
                {
                  "x": 602.728,
                  "y": -6.444
                },
                {
                  "x": 605.324,
                  "y": -6.852
                },
                {
                  "x": 607.656,
                  "y": -7.187999999999999
                },
                {
                  "x": 609.592,
                  "y": -7.416
                },
                {
                  "x": 611.0,
                  "y": -7.5
                }
              ]
            }
          ]
        },
        {
          "type": "turn_left",
          "startRoad": "road_2_1_0",
          "endRoad": "road_3_1_1",
          "direction": 0,
          "laneLinks": [
            {
              "startLaneIndex": 0,
              "endLaneIndex": 0,
              "points": [
                {
                  "x": 589.0,
                  "y": -1.5
                },
                {
                  "x": 590.241,
                  "y": -1.249
                },
                {
                  "x": 591.708,
                  "y": -0.552
                },
                {
                  "x": 593.317,
                  "y": 0.507
                },
                {
                  "x": 594.984,
                  "y": 1.844
                },
                {
                  "x": 596.625,
                  "y": 3.375
                },
                {
                  "x": 598.156,
                  "y": 5.016
                },
                {
                  "x": 599.4929999999999,
                  "y": 6.683
                },
                {
                  "x": 600.5519999999999,
                  "y": 8.292
                },
                {
                  "x": 601.249,
                  "y": 9.759
                },
                {
                  "x": 601.5,
                  "y": 11.0
                }
              ]
            },
            {
              "startLaneIndex": 0,
              "endLaneIndex": 1,
              "points": [
                {
                  "x": 589.0,
                  "y": -1.5
                },
                {
                  "x": 590.325,
                  "y": -1.249
                },
                {
                  "x": 592.02,
                  "y": -0.552
                },
                {
                  "x": 593.965,
                  "y": 0.507
                },
                {
                  "x": 596.04,
                  "y": 1.844
                },
                {
                  "x": 598.125,
                  "y": 3.375
                },
                {
                  "x": 600.1,
                  "y": 5.016
                },
                {
                  "x": 601.845,
                  "y": 6.683
                },
                {
                  "x": 603.2399999999999,
                  "y": 8.292
                },
                {
                  "x": 604.165,
                  "y": 9.759
                },
                {
                  "x": 604.5,
                  "y": 11.0
                }
              ]
            },
            {
              "startLaneIndex": 0,
              "endLaneIndex": 2,
              "points": [
                {
                  "x": 589.0,
                  "y": -1.5
                },
                {
                  "x": 590.409,
                  "y": -1.249
                },
                {
                  "x": 592.332,
                  "y": -0.552
                },
                {
                  "x": 594.613,
                  "y": 0.507
                },
                {
                  "x": 597.096,
                  "y": 1.844
                },
                {
                  "x": 599.625,
                  "y": 3.375
                },
                {
                  "x": 602.044,
                  "y": 5.016
                },
                {
                  "x": 604.197,
                  "y": 6.683
                },
                {
                  "x": 605.9279999999999,
                  "y": 8.292
                },
                {
                  "x": 607.081,
                  "y": 9.759
                },
                {
                  "x": 607.5,
                  "y": 11.0
                }
              ]
            }
          ]
        },
        {
          "type": "turn_right",
          "startRoad": "road_2_1_0",
          "endRoad": "road_3_1_3",
          "direction": 0,
          "laneLinks": [
            {
              "startLaneIndex": 2,
              "endLaneIndex": 0,
              "points": [
                {
                  "x": 589.0,
                  "y": -7.5
                },
                {
                  "x": 590.157,
                  "y": -7.499
                },
                {
                  "x": 591.396,
                  "y": -7.512
                },
                {
                  "x": 592.669,
                  "y": -7.563
                },
                {
                  "x": 593.928,
                  "y": -7.676
                },
                {
                  "x": 595.125,
                  "y": -7.875
                },
                {
                  "x": 596.212,
                  "y": -8.184
                },
                {
                  "x": 597.141,
                  "y": -8.627
                },
                {
                  "x": 597.8639999999999,
                  "y": -9.228
                },
                {
                  "x": 598.333,
                  "y": -10.011
                },
                {
                  "x": 598.5,
                  "y": -11.0
                }
              ]
            },
            {
              "startLaneIndex": 2,
              "endLaneIndex": 1,
              "points": [
                {
                  "x": 589.0,
                  "y": -7.5
                },
                {
                  "x": 590.073,
                  "y": -7.499
                },
                {
                  "x": 591.084,
                  "y": -7.512
                },
                {
                  "x": 592.021,
                  "y": -7.563
                },
                {
                  "x": 592.872,
                  "y": -7.676
                },
                {
                  "x": 593.625,
                  "y": -7.875
                },
                {
                  "x": 594.268,
                  "y": -8.184
                },
                {
                  "x": 594.789,
                  "y": -8.627
                },
                {
                  "x": 595.1759999999999,
                  "y": -9.228
                },
                {
                  "x": 595.417,
                  "y": -10.011
                },
                {
                  "x": 595.5,
                  "y": -11.0
                }
              ]
            },
            {
              "startLaneIndex": 2,
              "endLaneIndex": 2,
              "points": [
                {
                  "x": 589.0,
                  "y": -7.5
                },
                {
                  "x": 589.989,
                  "y": -7.499
                },
                {
                  "x": 590.772,
                  "y": -7.512
                },
                {
                  "x": 591.373,
                  "y": -7.563
                },
                {
                  "x": 591.816,
                  "y": -7.676
                },
                {
                  "x": 592.125,
                  "y": -7.875
                },
                {
                  "x": 592.324,
                  "y": -8.184
                },
                {
                  "x": 592.437,
                  "y": -8.627
                },
                {
                  "x": 592.4879999999999,
                  "y": -9.228
                },
                {
                  "x": 592.501,
                  "y": -10.011
                },
                {
                  "x": 592.5,
                  "y": -11.0
                }
              ]
            }
          ]
        },
        {
          "type": "turn_right",
          "startRoad": "road_3_0_1",
          "endRoad": "road_3_1_0",
          "direction": 1,
          "laneLinks": [
            {
              "startLaneIndex": 2,
              "endLaneIndex": 0,
              "points": [
                {
                  "x": 607.5,
                  "y": -11.0
                },
                {
                  "x": 607.499,
                  "y": -9.843
                },
                {
                  "x": 607.512,
                  "y": -8.604
                },
                {
                  "x": 607.563,
                  "y": -7.3309999999999995
                },
                {
                  "x": 607.676,
                  "y": -6.072
                },
                {
                  "x": 607.875,
                  "y": -4.875
                },
                {
                  "x": 608.184,
                  "y": -3.788
                },
                {
                  "x": 608.627,
                  "y": -2.859000000000001
                },
                {
                  "x": 609.2279999999998,
                  "y": -2.136000000000001
                },
                {
                  "x": 610.011,
                  "y": -1.6669999999999998
                },
                {
                  "x": 611.0,
                  "y": -1.5
                }
              ]
            },
            {
              "startLaneIndex": 2,
              "endLaneIndex": 1,
              "points": [
                {
                  "x": 607.5,
                  "y": -11.0
                },
                {
                  "x": 607.499,
                  "y": -9.927
                },
                {
                  "x": 607.512,
                  "y": -8.916
                },
                {
                  "x": 607.563,
                  "y": -7.979
                },
                {
                  "x": 607.676,
                  "y": -7.128
                },
                {
                  "x": 607.875,
                  "y": -6.375
                },
                {
                  "x": 608.184,
                  "y": -5.732
                },
                {
                  "x": 608.627,
                  "y": -5.211000000000001
                },
                {
                  "x": 609.2279999999998,
                  "y": -4.824000000000001
                },
                {
                  "x": 610.011,
                  "y": -4.583
                },
                {
                  "x": 611.0,
                  "y": -4.5
                }
              ]
            },
            {
              "startLaneIndex": 2,
              "endLaneIndex": 2,
              "points": [
                {
                  "x": 607.5,
                  "y": -11.0
                },
                {
                  "x": 607.499,
                  "y": -10.011
                },
                {
                  "x": 607.512,
                  "y": -9.228
                },
                {
                  "x": 607.563,
                  "y": -8.627
                },
                {
                  "x": 607.676,
                  "y": -8.184
                },
                {
                  "x": 607.875,
                  "y": -7.875
                },
                {
                  "x": 608.184,
                  "y": -7.676
                },
                {
                  "x": 608.627,
                  "y": -7.563000000000001
                },
                {
                  "x": 609.2279999999998,
                  "y": -7.512000000000001
                },
                {
                  "x": 610.011,
                  "y": -7.499
                },
                {
                  "x": 611.0,
                  "y": -7.5
                }
              ]
            }
          ]
        },
        {
          "type": "go_straight",
          "startRoad": "road_3_0_1",
          "endRoad": "road_3_1_1",
          "direction": 1,
          "laneLinks": [
            {
              "startLaneIndex": 1,
              "endLaneIndex": 0,
              "points": [
                {
                  "x": 604.5,
                  "y": -11.0
                },
                {
                  "x": 604.4159999999999,
                  "y": -9.592
                },
                {
                  "x": 604.188,
                  "y": -7.656
                },
                {
                  "x": 603.852,
                  "y": -5.324
                },
                {
                  "x": 603.444,
                  "y": -2.7279999999999998
                },
                {
                  "x": 603.0,
                  "y": 0.0
                },
                {
                  "x": 602.556,
                  "y": 2.7279999999999998
                },
                {
                  "x": 602.148,
                  "y": 5.323999999999999
                },
                {
                  "x": 601.8119999999999,
                  "y": 7.655999999999999
                },
                {
                  "x": 601.584,
                  "y": 9.592
                },
                {
                  "x": 601.5,
                  "y": 11.0
                }
              ]
            },
            {
              "startLaneIndex": 1,
              "endLaneIndex": 1,
              "points": [
                {
                  "x": 604.5,
                  "y": -11.0
                },
                {
                  "x": 604.5,
                  "y": -9.592
                },
                {
                  "x": 604.5,
                  "y": -7.656
                },
                {
                  "x": 604.5,
                  "y": -5.324
                },
                {
                  "x": 604.5,
                  "y": -2.7279999999999998
                },
                {
                  "x": 604.5,
                  "y": 0.0
                },
                {
                  "x": 604.5,
                  "y": 2.7279999999999998
                },
                {
                  "x": 604.5,
                  "y": 5.323999999999999
                },
                {
                  "x": 604.4999999999999,
                  "y": 7.655999999999999
                },
                {
                  "x": 604.5,
                  "y": 9.592
                },
                {
                  "x": 604.5,
                  "y": 11.0
                }
              ]
            },
            {
              "startLaneIndex": 1,
              "endLaneIndex": 2,
              "points": [
                {
                  "x": 604.5,
                  "y": -11.0
                },
                {
                  "x": 604.584,
                  "y": -9.592
                },
                {
                  "x": 604.812,
                  "y": -7.656
                },
                {
                  "x": 605.148,
                  "y": -5.324
                },
                {
                  "x": 605.556,
                  "y": -2.7279999999999998
                },
                {
                  "x": 606.0,
                  "y": 0.0
                },
                {
                  "x": 606.444,
                  "y": 2.7279999999999998
                },
                {
                  "x": 606.852,
                  "y": 5.323999999999999
                },
                {
                  "x": 607.1879999999999,
                  "y": 7.655999999999999
                },
                {
                  "x": 607.4159999999999,
                  "y": 9.592
                },
                {
                  "x": 607.5,
                  "y": 11.0
                }
              ]
            }
          ]
        },
        {
          "type": "turn_left",
          "startRoad": "road_3_0_1",
          "endRoad": "road_3_1_2",
          "direction": 1,
          "laneLinks": [
            {
              "startLaneIndex": 0,
              "endLaneIndex": 0,
              "points": [
                {
                  "x": 601.5,
                  "y": -11.0
                },
                {
                  "x": 601.249,
                  "y": -9.759
                },
                {
                  "x": 600.552,
                  "y": -8.292
                },
                {
                  "x": 599.4929999999999,
                  "y": -6.683
                },
                {
                  "x": 598.156,
                  "y": -5.016
                },
                {
                  "x": 596.625,
                  "y": -3.375
                },
                {
                  "x": 594.984,
                  "y": -1.844
                },
                {
                  "x": 593.317,
                  "y": -0.507000000000001
                },
                {
                  "x": 591.7079999999999,
                  "y": 0.551999999999999
                },
                {
                  "x": 590.241,
                  "y": 1.249
                },
                {
                  "x": 589.0,
                  "y": 1.5
                }
              ]
            },
            {
              "startLaneIndex": 0,
              "endLaneIndex": 1,
              "points": [
                {
                  "x": 601.5,
                  "y": -11.0
                },
                {
                  "x": 601.249,
                  "y": -9.675
                },
                {
                  "x": 600.552,
                  "y": -7.98
                },
                {
                  "x": 599.4929999999999,
                  "y": -6.035
                },
                {
                  "x": 598.156,
                  "y": -3.96
                },
                {
                  "x": 596.625,
                  "y": -1.875
                },
                {
                  "x": 594.984,
                  "y": 0.1
                },
                {
                  "x": 593.317,
                  "y": 1.844999999999999
                },
                {
                  "x": 591.7079999999999,
                  "y": 3.239999999999999
                },
                {
                  "x": 590.241,
                  "y": 4.165
                },
                {
                  "x": 589.0,
                  "y": 4.5
                }
              ]
            },
            {
              "startLaneIndex": 0,
              "endLaneIndex": 2,
              "points": [
                {
                  "x": 601.5,
                  "y": -11.0
                },
                {
                  "x": 601.249,
                  "y": -9.591
                },
                {
                  "x": 600.552,
                  "y": -7.668
                },
                {
                  "x": 599.4929999999999,
                  "y": -5.387
                },
                {
                  "x": 598.156,
                  "y": -2.904
                },
                {
                  "x": 596.625,
                  "y": -0.375
                },
                {
                  "x": 594.984,
                  "y": 2.044
                },
                {
                  "x": 593.317,
                  "y": 4.196999999999999
                },
                {
                  "x": 591.7079999999999,
                  "y": 5.927999999999999
                },
                {
                  "x": 590.241,
                  "y": 7.081
                },
                {
                  "x": 589.0,
                  "y": 7.5
                }
              ]
            }
          ]
        },
        {
          "type": "turn_right",
          "startRoad": "road_4_1_2",
          "endRoad": "road_3_1_1",
          "direction": 2,
          "laneLinks": [
            {
              "startLaneIndex": 2,
              "endLaneIndex": 0,
              "points": [
                {
                  "x": 611.0,
                  "y": 7.5
                },
                {
                  "x": 609.843,
                  "y": 7.499
                },
                {
                  "x": 608.604,
                  "y": 7.512
                },
                {
                  "x": 607.331,
                  "y": 7.563
                },
                {
                  "x": 606.072,
                  "y": 7.676
                },
                {
                  "x": 604.875,
                  "y": 7.875
                },
                {
                  "x": 603.788,
                  "y": 8.184
                },
                {
                  "x": 602.859,
                  "y": 8.627
                },
                {
                  "x": 602.1359999999999,
                  "y": 9.228
                },
                {
                  "x": 601.667,
                  "y": 10.011
                },
                {
                  "x": 601.5,
                  "y": 11.0
                }
              ]
            },
            {
              "startLaneIndex": 2,
              "endLaneIndex": 1,
              "points": [
                {
                  "x": 611.0,
                  "y": 7.5
                },
                {
                  "x": 609.927,
                  "y": 7.499
                },
                {
                  "x": 608.9159999999999,
                  "y": 7.512
                },
                {
                  "x": 607.979,
                  "y": 7.563
                },
                {
                  "x": 607.128,
                  "y": 7.676
                },
                {
                  "x": 606.375,
                  "y": 7.875
                },
                {
                  "x": 605.732,
                  "y": 8.184
                },
                {
                  "x": 605.211,
                  "y": 8.627
                },
                {
                  "x": 604.8239999999998,
                  "y": 9.228
                },
                {
                  "x": 604.583,
                  "y": 10.011
                },
                {
                  "x": 604.5,
                  "y": 11.0
                }
              ]
            },
            {
              "startLaneIndex": 2,
              "endLaneIndex": 2,
              "points": [
                {
                  "x": 611.0,
                  "y": 7.5
                },
                {
                  "x": 610.011,
                  "y": 7.499
                },
                {
                  "x": 609.228,
                  "y": 7.512
                },
                {
                  "x": 608.627,
                  "y": 7.563
                },
                {
                  "x": 608.184,
                  "y": 7.676
                },
                {
                  "x": 607.875,
                  "y": 7.875
                },
                {
                  "x": 607.676,
                  "y": 8.184
                },
                {
                  "x": 607.563,
                  "y": 8.627
                },
                {
                  "x": 607.512,
                  "y": 9.228
                },
                {
                  "x": 607.499,
                  "y": 10.011
                },
                {
                  "x": 607.5,
                  "y": 11.0
                }
              ]
            }
          ]
        },
        {
          "type": "go_straight",
          "startRoad": "road_4_1_2",
          "endRoad": "road_3_1_2",
          "direction": 2,
          "laneLinks": [
            {
              "startLaneIndex": 1,
              "endLaneIndex": 0,
              "points": [
                {
                  "x": 611.0,
                  "y": 4.5
                },
                {
                  "x": 609.592,
                  "y": 4.416
                },
                {
                  "x": 607.656,
                  "y": 4.188
                },
                {
                  "x": 605.324,
                  "y": 3.852
                },
                {
                  "x": 602.728,
                  "y": 3.444
                },
                {
                  "x": 600.0,
                  "y": 3.0
                },
                {
                  "x": 597.272,
                  "y": 2.556
                },
                {
                  "x": 594.676,
                  "y": 2.148
                },
                {
                  "x": 592.3439999999999,
                  "y": 1.811999999999999
                },
                {
                  "x": 590.408,
                  "y": 1.584
                },
                {
                  "x": 589.0,
                  "y": 1.5
                }
              ]
            },
            {
              "startLaneIndex": 1,
              "endLaneIndex": 1,
              "points": [
                {
                  "x": 611.0,
                  "y": 4.5
                },
                {
                  "x": 609.592,
                  "y": 4.5
                },
                {
                  "x": 607.656,
                  "y": 4.5
                },
                {
                  "x": 605.324,
                  "y": 4.5
                },
                {
                  "x": 602.728,
                  "y": 4.5
                },
                {
                  "x": 600.0,
                  "y": 4.5
                },
                {
                  "x": 597.272,
                  "y": 4.5
                },
                {
                  "x": 594.676,
                  "y": 4.5
                },
                {
                  "x": 592.3439999999999,
                  "y": 4.499999999999999
                },
                {
                  "x": 590.408,
                  "y": 4.5
                },
                {
                  "x": 589.0,
                  "y": 4.5
                }
              ]
            },
            {
              "startLaneIndex": 1,
              "endLaneIndex": 2,
              "points": [
                {
                  "x": 611.0,
                  "y": 4.5
                },
                {
                  "x": 609.592,
                  "y": 4.584
                },
                {
                  "x": 607.656,
                  "y": 4.812
                },
                {
                  "x": 605.324,
                  "y": 5.148
                },
                {
                  "x": 602.728,
                  "y": 5.556
                },
                {
                  "x": 600.0,
                  "y": 6.0
                },
                {
                  "x": 597.272,
                  "y": 6.444
                },
                {
                  "x": 594.676,
                  "y": 6.852
                },
                {
                  "x": 592.3439999999999,
                  "y": 7.187999999999999
                },
                {
                  "x": 590.408,
                  "y": 7.416
                },
                {
                  "x": 589.0,
                  "y": 7.5
                }
              ]
            }
          ]
        },
        {
          "type": "turn_left",
          "startRoad": "road_4_1_2",
          "endRoad": "road_3_1_3",
          "direction": 2,
          "laneLinks": [
            {
              "startLaneIndex": 0,
              "endLaneIndex": 0,
              "points": [
                {
                  "x": 611.0,
                  "y": 1.5
                },
                {
                  "x": 609.759,
                  "y": 1.249
                },
                {
                  "x": 608.292,
                  "y": 0.552
                },
                {
                  "x": 606.683,
                  "y": -0.507
                },
                {
                  "x": 605.016,
                  "y": -1.844
                },
                {
                  "x": 603.375,
                  "y": -3.375
                },
                {
                  "x": 601.844,
                  "y": -5.016
                },
                {
                  "x": 600.507,
                  "y": -6.683
                },
                {
                  "x": 599.4479999999999,
                  "y": -8.292
                },
                {
                  "x": 598.751,
                  "y": -9.759
                },
                {
                  "x": 598.5,
                  "y": -11.0
                }
              ]
            },
            {
              "startLaneIndex": 0,
              "endLaneIndex": 1,
              "points": [
                {
                  "x": 611.0,
                  "y": 1.5
                },
                {
                  "x": 609.675,
                  "y": 1.249
                },
                {
                  "x": 607.98,
                  "y": 0.552
                },
                {
                  "x": 606.035,
                  "y": -0.507
                },
                {
                  "x": 603.96,
                  "y": -1.844
                },
                {
                  "x": 601.875,
                  "y": -3.375
                },
                {
                  "x": 599.9,
                  "y": -5.016
                },
                {
                  "x": 598.155,
                  "y": -6.683
                },
                {
                  "x": 596.7599999999999,
                  "y": -8.292
                },
                {
                  "x": 595.835,
                  "y": -9.759
                },
                {
                  "x": 595.5,
                  "y": -11.0
                }
              ]
            },
            {
              "startLaneIndex": 0,
              "endLaneIndex": 2,
              "points": [
                {
                  "x": 611.0,
                  "y": 1.5
                },
                {
                  "x": 609.591,
                  "y": 1.249
                },
                {
                  "x": 607.668,
                  "y": 0.552
                },
                {
                  "x": 605.387,
                  "y": -0.507
                },
                {
                  "x": 602.904,
                  "y": -1.844
                },
                {
                  "x": 600.375,
                  "y": -3.375
                },
                {
                  "x": 597.956,
                  "y": -5.016
                },
                {
                  "x": 595.803,
                  "y": -6.683
                },
                {
                  "x": 594.0719999999999,
                  "y": -8.292
                },
                {
                  "x": 592.919,
                  "y": -9.759
                },
                {
                  "x": 592.5,
                  "y": -11.0
                }
              ]
            }
          ]
        },
        {
          "type": "turn_left",
          "startRoad": "road_3_2_3",
          "endRoad": "road_3_1_0",
          "direction": 3,
          "laneLinks": [
            {
              "startLaneIndex": 0,
              "endLaneIndex": 0,
              "points": [
                {
                  "x": 598.5,
                  "y": 11.0
                },
                {
                  "x": 598.751,
                  "y": 9.759
                },
                {
                  "x": 599.448,
                  "y": 8.292
                },
                {
                  "x": 600.507,
                  "y": 6.683
                },
                {
                  "x": 601.844,
                  "y": 5.016
                },
                {
                  "x": 603.375,
                  "y": 3.375
                },
                {
                  "x": 605.016,
                  "y": 1.844
                },
                {
                  "x": 606.683,
                  "y": 0.507000000000001
                },
                {
                  "x": 608.2919999999999,
                  "y": -0.551999999999999
                },
                {
                  "x": 609.759,
                  "y": -1.249
                },
                {
                  "x": 611.0,
                  "y": -1.5
                }
              ]
            },
            {
              "startLaneIndex": 0,
              "endLaneIndex": 1,
              "points": [
                {
                  "x": 598.5,
                  "y": 11.0
                },
                {
                  "x": 598.751,
                  "y": 9.675
                },
                {
                  "x": 599.448,
                  "y": 7.98
                },
                {
                  "x": 600.507,
                  "y": 6.035
                },
                {
                  "x": 601.844,
                  "y": 3.96
                },
                {
                  "x": 603.375,
                  "y": 1.875
                },
                {
                  "x": 605.016,
                  "y": -0.1
                },
                {
                  "x": 606.683,
                  "y": -1.844999999999999
                },
                {
                  "x": 608.2919999999999,
                  "y": -3.239999999999999
                },
                {
                  "x": 609.759,
                  "y": -4.165
                },
                {
                  "x": 611.0,
                  "y": -4.5
                }
              ]
            },
            {
              "startLaneIndex": 0,
              "endLaneIndex": 2,
              "points": [
                {
                  "x": 598.5,
                  "y": 11.0
                },
                {
                  "x": 598.751,
                  "y": 9.591
                },
                {
                  "x": 599.448,
                  "y": 7.668
                },
                {
                  "x": 600.507,
                  "y": 5.387
                },
                {
                  "x": 601.844,
                  "y": 2.904
                },
                {
                  "x": 603.375,
                  "y": 0.375
                },
                {
                  "x": 605.016,
                  "y": -2.044
                },
                {
                  "x": 606.683,
                  "y": -4.196999999999999
                },
                {
                  "x": 608.2919999999999,
                  "y": -5.927999999999999
                },
                {
                  "x": 609.759,
                  "y": -7.081
                },
                {
                  "x": 611.0,
                  "y": -7.5
                }
              ]
            }
          ]
        },
        {
          "type": "turn_right",
          "startRoad": "road_3_2_3",
          "endRoad": "road_3_1_2",
          "direction": 3,
          "laneLinks": [
            {
              "startLaneIndex": 2,
              "endLaneIndex": 0,
              "points": [
                {
                  "x": 592.5,
                  "y": 11.0
                },
                {
                  "x": 592.501,
                  "y": 9.843
                },
                {
                  "x": 592.488,
                  "y": 8.604
                },
                {
                  "x": 592.437,
                  "y": 7.3309999999999995
                },
                {
                  "x": 592.324,
                  "y": 6.072
                },
                {
                  "x": 592.125,
                  "y": 4.875
                },
                {
                  "x": 591.816,
                  "y": 3.788
                },
                {
                  "x": 591.373,
                  "y": 2.859000000000001
                },
                {
                  "x": 590.7719999999999,
                  "y": 2.136000000000001
                },
                {
                  "x": 589.989,
                  "y": 1.6669999999999998
                },
                {
                  "x": 589.0,
                  "y": 1.5
                }
              ]
            },
            {
              "startLaneIndex": 2,
              "endLaneIndex": 1,
              "points": [
                {
                  "x": 592.5,
                  "y": 11.0
                },
                {
                  "x": 592.501,
                  "y": 9.927
                },
                {
                  "x": 592.488,
                  "y": 8.916
                },
                {
                  "x": 592.437,
                  "y": 7.979
                },
                {
                  "x": 592.324,
                  "y": 7.128
                },
                {
                  "x": 592.125,
                  "y": 6.375
                },
                {
                  "x": 591.816,
                  "y": 5.732
                },
                {
                  "x": 591.373,
                  "y": 5.211000000000001
                },
                {
                  "x": 590.7719999999999,
                  "y": 4.824000000000001
                },
                {
                  "x": 589.989,
                  "y": 4.583
                },
                {
                  "x": 589.0,
                  "y": 4.5
                }
              ]
            },
            {
              "startLaneIndex": 2,
              "endLaneIndex": 2,
              "points": [
                {
                  "x": 592.5,
                  "y": 11.0
                },
                {
                  "x": 592.501,
                  "y": 10.011
                },
                {
                  "x": 592.488,
                  "y": 9.228
                },
                {
                  "x": 592.437,
                  "y": 8.627
                },
                {
                  "x": 592.324,
                  "y": 8.184
                },
                {
                  "x": 592.125,
                  "y": 7.875
                },
                {
                  "x": 591.816,
                  "y": 7.676
                },
                {
                  "x": 591.373,
                  "y": 7.563000000000001
                },
                {
                  "x": 590.7719999999999,
                  "y": 7.512000000000001
                },
                {
                  "x": 589.989,
                  "y": 7.499
                },
                {
                  "x": 589.0,
                  "y": 7.5
                }
              ]
            }
          ]
        },
        {
          "type": "go_straight",
          "startRoad": "road_3_2_3",
          "endRoad": "road_3_1_3",
          "direction": 3,
          "laneLinks": [
            {
              "startLaneIndex": 1,
              "endLaneIndex": 0,
              "points": [
                {
                  "x": 595.5,
                  "y": 11.0
                },
                {
                  "x": 595.584,
                  "y": 9.592
                },
                {
                  "x": 595.812,
                  "y": 7.656
                },
                {
                  "x": 596.148,
                  "y": 5.324
                },
                {
                  "x": 596.556,
                  "y": 2.7279999999999998
                },
                {
                  "x": 597.0,
                  "y": 0.0
                },
                {
                  "x": 597.444,
                  "y": -2.7279999999999998
                },
                {
                  "x": 597.852,
                  "y": -5.323999999999999
                },
                {
                  "x": 598.1879999999999,
                  "y": -7.655999999999999
                },
                {
                  "x": 598.4159999999999,
                  "y": -9.592
                },
                {
                  "x": 598.5,
                  "y": -11.0
                }
              ]
            },
            {
              "startLaneIndex": 1,
              "endLaneIndex": 1,
              "points": [
                {
                  "x": 595.5,
                  "y": 11.0
                },
                {
                  "x": 595.5,
                  "y": 9.592
                },
                {
                  "x": 595.5,
                  "y": 7.656
                },
                {
                  "x": 595.5,
                  "y": 5.324
                },
                {
                  "x": 595.5,
                  "y": 2.7279999999999998
                },
                {
                  "x": 595.5,
                  "y": 0.0
                },
                {
                  "x": 595.5,
                  "y": -2.7279999999999998
                },
                {
                  "x": 595.5,
                  "y": -5.323999999999999
                },
                {
                  "x": 595.4999999999999,
                  "y": -7.655999999999999
                },
                {
                  "x": 595.5,
                  "y": -9.592
                },
                {
                  "x": 595.5,
                  "y": -11.0
                }
              ]
            },
            {
              "startLaneIndex": 1,
              "endLaneIndex": 2,
              "points": [
                {
                  "x": 595.5,
                  "y": 11.0
                },
                {
                  "x": 595.4159999999999,
                  "y": 9.592
                },
                {
                  "x": 595.188,
                  "y": 7.656
                },
                {
                  "x": 594.852,
                  "y": 5.324
                },
                {
                  "x": 594.444,
                  "y": 2.7279999999999998
                },
                {
                  "x": 594.0,
                  "y": 0.0
                },
                {
                  "x": 593.556,
                  "y": -2.7279999999999998
                },
                {
                  "x": 593.148,
                  "y": -5.323999999999999
                },
                {
                  "x": 592.8119999999999,
                  "y": -7.655999999999999
                },
                {
                  "x": 592.584,
                  "y": -9.592
                },
                {
                  "x": 592.5,
                  "y": -11.0
                }
              ]
            }
          ]
        }
      ],
      "trafficLight": {
        "roadLinkIndices": [
          0,
          1,
          2,
          3,
          4,
          5,
          6,
          7,
          8,
          9,
          10,
          11
        ],
        "lightphases": [
          {
            "time": 5,
            "availableRoadLinks": [
              10,
              2,
              3,
              6
            ]
          },
          {
            "time": 30,
            "availableRoadLinks": [
              0,
              2,
              3,
              6,
              7,
              10
            ]
          },
          {
            "time": 30,
            "availableRoadLinks": [
              2,
              3,
              4,
              6,
              10,
              11
            ]
          },
          {
            "time": 30,
            "availableRoadLinks": [
              1,
              2,
              3,
              6,
              8,
              10
            ]
          },
          {
            "time": 30,
            "availableRoadLinks": [
              2,
              3,
              5,
              6,
              9,
              10
            ]
          },
          {
            "time": 30,
            "availableRoadLinks": [
              0,
              1,
              2,
              3,
              6,
              10
            ]
          },
          {
            "time": 30,
            "availableRoadLinks": [
              2,
              3,
              6,
              7,
              8,
              10
            ]
          },
          {
            "time": 30,
            "availableRoadLinks": [
              2,
              3,
              4,
              5,
              6,
              10
            ]
          },
          {
            "time": 30,
            "availableRoadLinks": [
              2,
              3,
              6,
              9,
              10,
              11
            ]
          }
        ]
      },
      "virtual": false
    },
    {
      "id": "intersection_3_2",
      "point": {
        "x": 600,
        "y": 300
      },
      "width": 11,
      "roads": [
        "road_2_2_0",
        "road_3_1_1",
        "road_4_2_2",
        "road_3_3_3",
        "road_3_2_0",
        "road_3_2_1",
        "road_3_2_2",
        "road_3_2_3"
      ],
      "roadLinks": [
        {
          "type": "go_straight",
          "startRoad": "road_2_2_0",
          "endRoad": "road_3_2_0",
          "direction": 0,
          "laneLinks": [
            {
              "startLaneIndex": 1,
              "endLaneIndex": 0,
              "points": [
                {
                  "x": 589.0,
                  "y": 295.5
                },
                {
                  "x": 590.408,
                  "y": 295.584
                },
                {
                  "x": 592.344,
                  "y": 295.812
                },
                {
                  "x": 594.676,
                  "y": 296.148
                },
                {
                  "x": 597.272,
                  "y": 296.556
                },
                {
                  "x": 600.0,
                  "y": 297.0
                },
                {
                  "x": 602.728,
                  "y": 297.444
                },
                {
                  "x": 605.324,
                  "y": 297.852
                },
                {
                  "x": 607.656,
                  "y": 298.188
                },
                {
                  "x": 609.592,
                  "y": 298.416
                },
                {
                  "x": 611.0,
                  "y": 298.5
                }
              ]
            },
            {
              "startLaneIndex": 1,
              "endLaneIndex": 1,
              "points": [
                {
                  "x": 589.0,
                  "y": 295.5
                },
                {
                  "x": 590.408,
                  "y": 295.5
                },
                {
                  "x": 592.344,
                  "y": 295.5
                },
                {
                  "x": 594.676,
                  "y": 295.5
                },
                {
                  "x": 597.272,
                  "y": 295.5
                },
                {
                  "x": 600.0,
                  "y": 295.5
                },
                {
                  "x": 602.728,
                  "y": 295.5
                },
                {
                  "x": 605.324,
                  "y": 295.5
                },
                {
                  "x": 607.656,
                  "y": 295.5
                },
                {
                  "x": 609.592,
                  "y": 295.5
                },
                {
                  "x": 611.0,
                  "y": 295.5
                }
              ]
            },
            {
              "startLaneIndex": 1,
              "endLaneIndex": 2,
              "points": [
                {
                  "x": 589.0,
                  "y": 295.5
                },
                {
                  "x": 590.408,
                  "y": 295.416
                },
                {
                  "x": 592.344,
                  "y": 295.188
                },
                {
                  "x": 594.676,
                  "y": 294.852
                },
                {
                  "x": 597.272,
                  "y": 294.444
                },
                {
                  "x": 600.0,
                  "y": 294.0
                },
                {
                  "x": 602.728,
                  "y": 293.556
                },
                {
                  "x": 605.324,
                  "y": 293.148
                },
                {
                  "x": 607.656,
                  "y": 292.812
                },
                {
                  "x": 609.592,
                  "y": 292.584
                },
                {
                  "x": 611.0,
                  "y": 292.5
                }
              ]
            }
          ]
        },
        {
          "type": "turn_left",
          "startRoad": "road_2_2_0",
          "endRoad": "road_3_2_1",
          "direction": 0,
          "laneLinks": [
            {
              "startLaneIndex": 0,
              "endLaneIndex": 0,
              "points": [
                {
                  "x": 589.0,
                  "y": 298.5
                },
                {
                  "x": 590.241,
                  "y": 298.751
                },
                {
                  "x": 591.708,
                  "y": 299.448
                },
                {
                  "x": 593.317,
                  "y": 300.507
                },
                {
                  "x": 594.984,
                  "y": 301.844
                },
                {
                  "x": 596.625,
                  "y": 303.375
                },
                {
                  "x": 598.156,
                  "y": 305.016
                },
                {
                  "x": 599.4929999999999,
                  "y": 306.683
                },
                {
                  "x": 600.5519999999999,
                  "y": 308.292
                },
                {
                  "x": 601.249,
                  "y": 309.759
                },
                {
                  "x": 601.5,
                  "y": 311.0
                }
              ]
            },
            {
              "startLaneIndex": 0,
              "endLaneIndex": 1,
              "points": [
                {
                  "x": 589.0,
                  "y": 298.5
                },
                {
                  "x": 590.325,
                  "y": 298.751
                },
                {
                  "x": 592.02,
                  "y": 299.448
                },
                {
                  "x": 593.965,
                  "y": 300.507
                },
                {
                  "x": 596.04,
                  "y": 301.844
                },
                {
                  "x": 598.125,
                  "y": 303.375
                },
                {
                  "x": 600.1,
                  "y": 305.016
                },
                {
                  "x": 601.845,
                  "y": 306.683
                },
                {
                  "x": 603.2399999999999,
                  "y": 308.292
                },
                {
                  "x": 604.165,
                  "y": 309.759
                },
                {
                  "x": 604.5,
                  "y": 311.0
                }
              ]
            },
            {
              "startLaneIndex": 0,
              "endLaneIndex": 2,
              "points": [
                {
                  "x": 589.0,
                  "y": 298.5
                },
                {
                  "x": 590.409,
                  "y": 298.751
                },
                {
                  "x": 592.332,
                  "y": 299.448
                },
                {
                  "x": 594.613,
                  "y": 300.507
                },
                {
                  "x": 597.096,
                  "y": 301.844
                },
                {
                  "x": 599.625,
                  "y": 303.375
                },
                {
                  "x": 602.044,
                  "y": 305.016
                },
                {
                  "x": 604.197,
                  "y": 306.683
                },
                {
                  "x": 605.9279999999999,
                  "y": 308.292
                },
                {
                  "x": 607.081,
                  "y": 309.759
                },
                {
                  "x": 607.5,
                  "y": 311.0
                }
              ]
            }
          ]
        },
        {
          "type": "turn_right",
          "startRoad": "road_2_2_0",
          "endRoad": "road_3_2_3",
          "direction": 0,
          "laneLinks": [
            {
              "startLaneIndex": 2,
              "endLaneIndex": 0,
              "points": [
                {
                  "x": 589.0,
                  "y": 292.5
                },
                {
                  "x": 590.157,
                  "y": 292.501
                },
                {
                  "x": 591.396,
                  "y": 292.488
                },
                {
                  "x": 592.669,
                  "y": 292.437
                },
                {
                  "x": 593.928,
                  "y": 292.324
                },
                {
                  "x": 595.125,
                  "y": 292.125
                },
                {
                  "x": 596.212,
                  "y": 291.816
                },
                {
                  "x": 597.141,
                  "y": 291.373
                },
                {
                  "x": 597.8639999999999,
                  "y": 290.772
                },
                {
                  "x": 598.333,
                  "y": 289.98900000000003
                },
                {
                  "x": 598.5,
                  "y": 289.0
                }
              ]
            },
            {
              "startLaneIndex": 2,
              "endLaneIndex": 1,
              "points": [
                {
                  "x": 589.0,
                  "y": 292.5
                },
                {
                  "x": 590.073,
                  "y": 292.501
                },
                {
                  "x": 591.084,
                  "y": 292.488
                },
                {
                  "x": 592.021,
                  "y": 292.437
                },
                {
                  "x": 592.872,
                  "y": 292.324
                },
                {
                  "x": 593.625,
                  "y": 292.125
                },
                {
                  "x": 594.268,
                  "y": 291.816
                },
                {
                  "x": 594.789,
                  "y": 291.373
                },
                {
                  "x": 595.1759999999999,
                  "y": 290.772
                },
                {
                  "x": 595.417,
                  "y": 289.98900000000003
                },
                {
                  "x": 595.5,
                  "y": 289.0
                }
              ]
            },
            {
              "startLaneIndex": 2,
              "endLaneIndex": 2,
              "points": [
                {
                  "x": 589.0,
                  "y": 292.5
                },
                {
                  "x": 589.989,
                  "y": 292.501
                },
                {
                  "x": 590.772,
                  "y": 292.488
                },
                {
                  "x": 591.373,
                  "y": 292.437
                },
                {
                  "x": 591.816,
                  "y": 292.324
                },
                {
                  "x": 592.125,
                  "y": 292.125
                },
                {
                  "x": 592.324,
                  "y": 291.816
                },
                {
                  "x": 592.437,
                  "y": 291.373
                },
                {
                  "x": 592.4879999999999,
                  "y": 290.772
                },
                {
                  "x": 592.501,
                  "y": 289.98900000000003
                },
                {
                  "x": 592.5,
                  "y": 289.0
                }
              ]
            }
          ]
        },
        {
          "type": "turn_right",
          "startRoad": "road_3_1_1",
          "endRoad": "road_3_2_0",
          "direction": 1,
          "laneLinks": [
            {
              "startLaneIndex": 2,
              "endLaneIndex": 0,
              "points": [
                {
                  "x": 607.5,
                  "y": 289.0
                },
                {
                  "x": 607.499,
                  "y": 290.157
                },
                {
                  "x": 607.512,
                  "y": 291.396
                },
                {
                  "x": 607.563,
                  "y": 292.669
                },
                {
                  "x": 607.676,
                  "y": 293.928
                },
                {
                  "x": 607.875,
                  "y": 295.125
                },
                {
                  "x": 608.184,
                  "y": 296.212
                },
                {
                  "x": 608.627,
                  "y": 297.141
                },
                {
                  "x": 609.2279999999998,
                  "y": 297.864
                },
                {
                  "x": 610.011,
                  "y": 298.333
                },
                {
                  "x": 611.0,
                  "y": 298.5
                }
              ]
            },
            {
              "startLaneIndex": 2,
              "endLaneIndex": 1,
              "points": [
                {
                  "x": 607.5,
                  "y": 289.0
                },
                {
                  "x": 607.499,
                  "y": 290.073
                },
                {
                  "x": 607.512,
                  "y": 291.084
                },
                {
                  "x": 607.563,
                  "y": 292.021
                },
                {
                  "x": 607.676,
                  "y": 292.872
                },
                {
                  "x": 607.875,
                  "y": 293.625
                },
                {
                  "x": 608.184,
                  "y": 294.268
                },
                {
                  "x": 608.627,
                  "y": 294.789
                },
                {
                  "x": 609.2279999999998,
                  "y": 295.176
                },
                {
                  "x": 610.011,
                  "y": 295.41700000000003
                },
                {
                  "x": 611.0,
                  "y": 295.5
                }
              ]
            },
            {
              "startLaneIndex": 2,
              "endLaneIndex": 2,
              "points": [
                {
                  "x": 607.5,
                  "y": 289.0
                },
                {
                  "x": 607.499,
                  "y": 289.989
                },
                {
                  "x": 607.512,
                  "y": 290.772
                },
                {
                  "x": 607.563,
                  "y": 291.373
                },
                {
                  "x": 607.676,
                  "y": 291.816
                },
                {
                  "x": 607.875,
                  "y": 292.125
                },
                {
                  "x": 608.184,
                  "y": 292.324
                },
                {
                  "x": 608.627,
                  "y": 292.437
                },
                {
                  "x": 609.2279999999998,
                  "y": 292.488
                },
                {
                  "x": 610.011,
                  "y": 292.50100000000003
                },
                {
                  "x": 611.0,
                  "y": 292.5
                }
              ]
            }
          ]
        },
        {
          "type": "go_straight",
          "startRoad": "road_3_1_1",
          "endRoad": "road_3_2_1",
          "direction": 1,
          "laneLinks": [
            {
              "startLaneIndex": 1,
              "endLaneIndex": 0,
              "points": [
                {
                  "x": 604.5,
                  "y": 289.0
                },
                {
                  "x": 604.4159999999999,
                  "y": 290.408
                },
                {
                  "x": 604.188,
                  "y": 292.344
                },
                {
                  "x": 603.852,
                  "y": 294.676
                },
                {
                  "x": 603.444,
                  "y": 297.272
                },
                {
                  "x": 603.0,
                  "y": 300.0
                },
                {
                  "x": 602.556,
                  "y": 302.728
                },
                {
                  "x": 602.148,
                  "y": 305.324
                },
                {
                  "x": 601.8119999999999,
                  "y": 307.656
                },
                {
                  "x": 601.584,
                  "y": 309.592
                },
                {
                  "x": 601.5,
                  "y": 311.0
                }
              ]
            },
            {
              "startLaneIndex": 1,
              "endLaneIndex": 1,
              "points": [
                {
                  "x": 604.5,
                  "y": 289.0
                },
                {
                  "x": 604.5,
                  "y": 290.408
                },
                {
                  "x": 604.5,
                  "y": 292.344
                },
                {
                  "x": 604.5,
                  "y": 294.676
                },
                {
                  "x": 604.5,
                  "y": 297.272
                },
                {
                  "x": 604.5,
                  "y": 300.0
                },
                {
                  "x": 604.5,
                  "y": 302.728
                },
                {
                  "x": 604.5,
                  "y": 305.324
                },
                {
                  "x": 604.4999999999999,
                  "y": 307.656
                },
                {
                  "x": 604.5,
                  "y": 309.592
                },
                {
                  "x": 604.5,
                  "y": 311.0
                }
              ]
            },
            {
              "startLaneIndex": 1,
              "endLaneIndex": 2,
              "points": [
                {
                  "x": 604.5,
                  "y": 289.0
                },
                {
                  "x": 604.584,
                  "y": 290.408
                },
                {
                  "x": 604.812,
                  "y": 292.344
                },
                {
                  "x": 605.148,
                  "y": 294.676
                },
                {
                  "x": 605.556,
                  "y": 297.272
                },
                {
                  "x": 606.0,
                  "y": 300.0
                },
                {
                  "x": 606.444,
                  "y": 302.728
                },
                {
                  "x": 606.852,
                  "y": 305.324
                },
                {
                  "x": 607.1879999999999,
                  "y": 307.656
                },
                {
                  "x": 607.4159999999999,
                  "y": 309.592
                },
                {
                  "x": 607.5,
                  "y": 311.0
                }
              ]
            }
          ]
        },
        {
          "type": "turn_left",
          "startRoad": "road_3_1_1",
          "endRoad": "road_3_2_2",
          "direction": 1,
          "laneLinks": [
            {
              "startLaneIndex": 0,
              "endLaneIndex": 0,
              "points": [
                {
                  "x": 601.5,
                  "y": 289.0
                },
                {
                  "x": 601.249,
                  "y": 290.241
                },
                {
                  "x": 600.552,
                  "y": 291.70799999999997
                },
                {
                  "x": 599.4929999999999,
                  "y": 293.317
                },
                {
                  "x": 598.156,
                  "y": 294.984
                },
                {
                  "x": 596.625,
                  "y": 296.625
                },
                {
                  "x": 594.984,
                  "y": 298.156
                },
                {
                  "x": 593.317,
                  "y": 299.493
                },
                {
                  "x": 591.7079999999999,
                  "y": 300.552
                },
                {
                  "x": 590.241,
                  "y": 301.249
                },
                {
                  "x": 589.0,
                  "y": 301.5
                }
              ]
            },
            {
              "startLaneIndex": 0,
              "endLaneIndex": 1,
              "points": [
                {
                  "x": 601.5,
                  "y": 289.0
                },
                {
                  "x": 601.249,
                  "y": 290.325
                },
                {
                  "x": 600.552,
                  "y": 292.02
                },
                {
                  "x": 599.4929999999999,
                  "y": 293.965
                },
                {
                  "x": 598.156,
                  "y": 296.04
                },
                {
                  "x": 596.625,
                  "y": 298.125
                },
                {
                  "x": 594.984,
                  "y": 300.1
                },
                {
                  "x": 593.317,
                  "y": 301.845
                },
                {
                  "x": 591.7079999999999,
                  "y": 303.24
                },
                {
                  "x": 590.241,
                  "y": 304.165
                },
                {
                  "x": 589.0,
                  "y": 304.5
                }
              ]
            },
            {
              "startLaneIndex": 0,
              "endLaneIndex": 2,
              "points": [
                {
                  "x": 601.5,
                  "y": 289.0
                },
                {
                  "x": 601.249,
                  "y": 290.409
                },
                {
                  "x": 600.552,
                  "y": 292.332
                },
                {
                  "x": 599.4929999999999,
                  "y": 294.613
                },
                {
                  "x": 598.156,
                  "y": 297.096
                },
                {
                  "x": 596.625,
                  "y": 299.625
                },
                {
                  "x": 594.984,
                  "y": 302.044
                },
                {
                  "x": 593.317,
                  "y": 304.197
                },
                {
                  "x": 591.7079999999999,
                  "y": 305.928
                },
                {
                  "x": 590.241,
                  "y": 307.081
                },
                {
                  "x": 589.0,
                  "y": 307.5
                }
              ]
            }
          ]
        },
        {
          "type": "turn_right",
          "startRoad": "road_4_2_2",
          "endRoad": "road_3_2_1",
          "direction": 2,
          "laneLinks": [
            {
              "startLaneIndex": 2,
              "endLaneIndex": 0,
              "points": [
                {
                  "x": 611.0,
                  "y": 307.5
                },
                {
                  "x": 609.843,
                  "y": 307.499
                },
                {
                  "x": 608.604,
                  "y": 307.512
                },
                {
                  "x": 607.331,
                  "y": 307.563
                },
                {
                  "x": 606.072,
                  "y": 307.676
                },
                {
                  "x": 604.875,
                  "y": 307.875
                },
                {
                  "x": 603.788,
                  "y": 308.18399999999997
                },
                {
                  "x": 602.859,
                  "y": 308.627
                },
                {
                  "x": 602.1359999999999,
                  "y": 309.228
                },
                {
                  "x": 601.667,
                  "y": 310.011
                },
                {
                  "x": 601.5,
                  "y": 311.0
                }
              ]
            },
            {
              "startLaneIndex": 2,
              "endLaneIndex": 1,
              "points": [
                {
                  "x": 611.0,
                  "y": 307.5
                },
                {
                  "x": 609.927,
                  "y": 307.499
                },
                {
                  "x": 608.9159999999999,
                  "y": 307.512
                },
                {
                  "x": 607.979,
                  "y": 307.563
                },
                {
                  "x": 607.128,
                  "y": 307.676
                },
                {
                  "x": 606.375,
                  "y": 307.875
                },
                {
                  "x": 605.732,
                  "y": 308.18399999999997
                },
                {
                  "x": 605.211,
                  "y": 308.627
                },
                {
                  "x": 604.8239999999998,
                  "y": 309.228
                },
                {
                  "x": 604.583,
                  "y": 310.011
                },
                {
                  "x": 604.5,
                  "y": 311.0
                }
              ]
            },
            {
              "startLaneIndex": 2,
              "endLaneIndex": 2,
              "points": [
                {
                  "x": 611.0,
                  "y": 307.5
                },
                {
                  "x": 610.011,
                  "y": 307.499
                },
                {
                  "x": 609.228,
                  "y": 307.512
                },
                {
                  "x": 608.627,
                  "y": 307.563
                },
                {
                  "x": 608.184,
                  "y": 307.676
                },
                {
                  "x": 607.875,
                  "y": 307.875
                },
                {
                  "x": 607.676,
                  "y": 308.18399999999997
                },
                {
                  "x": 607.563,
                  "y": 308.627
                },
                {
                  "x": 607.512,
                  "y": 309.228
                },
                {
                  "x": 607.499,
                  "y": 310.011
                },
                {
                  "x": 607.5,
                  "y": 311.0
                }
              ]
            }
          ]
        },
        {
          "type": "go_straight",
          "startRoad": "road_4_2_2",
          "endRoad": "road_3_2_2",
          "direction": 2,
          "laneLinks": [
            {
              "startLaneIndex": 1,
              "endLaneIndex": 0,
              "points": [
                {
                  "x": 611.0,
                  "y": 304.5
                },
                {
                  "x": 609.592,
                  "y": 304.416
                },
                {
                  "x": 607.656,
                  "y": 304.188
                },
                {
                  "x": 605.324,
                  "y": 303.852
                },
                {
                  "x": 602.728,
                  "y": 303.444
                },
                {
                  "x": 600.0,
                  "y": 303.0
                },
                {
                  "x": 597.272,
                  "y": 302.556
                },
                {
                  "x": 594.676,
                  "y": 302.148
                },
                {
                  "x": 592.3439999999999,
                  "y": 301.812
                },
                {
                  "x": 590.408,
                  "y": 301.584
                },
                {
                  "x": 589.0,
                  "y": 301.5
                }
              ]
            },
            {
              "startLaneIndex": 1,
              "endLaneIndex": 1,
              "points": [
                {
                  "x": 611.0,
                  "y": 304.5
                },
                {
                  "x": 609.592,
                  "y": 304.5
                },
                {
                  "x": 607.656,
                  "y": 304.5
                },
                {
                  "x": 605.324,
                  "y": 304.5
                },
                {
                  "x": 602.728,
                  "y": 304.5
                },
                {
                  "x": 600.0,
                  "y": 304.5
                },
                {
                  "x": 597.272,
                  "y": 304.5
                },
                {
                  "x": 594.676,
                  "y": 304.5
                },
                {
                  "x": 592.3439999999999,
                  "y": 304.5
                },
                {
                  "x": 590.408,
                  "y": 304.5
                },
                {
                  "x": 589.0,
                  "y": 304.5
                }
              ]
            },
            {
              "startLaneIndex": 1,
              "endLaneIndex": 2,
              "points": [
                {
                  "x": 611.0,
                  "y": 304.5
                },
                {
                  "x": 609.592,
                  "y": 304.584
                },
                {
                  "x": 607.656,
                  "y": 304.812
                },
                {
                  "x": 605.324,
                  "y": 305.148
                },
                {
                  "x": 602.728,
                  "y": 305.556
                },
                {
                  "x": 600.0,
                  "y": 306.0
                },
                {
                  "x": 597.272,
                  "y": 306.444
                },
                {
                  "x": 594.676,
                  "y": 306.852
                },
                {
                  "x": 592.3439999999999,
                  "y": 307.188
                },
                {
                  "x": 590.408,
                  "y": 307.416
                },
                {
                  "x": 589.0,
                  "y": 307.5
                }
              ]
            }
          ]
        },
        {
          "type": "turn_left",
          "startRoad": "road_4_2_2",
          "endRoad": "road_3_2_3",
          "direction": 2,
          "laneLinks": [
            {
              "startLaneIndex": 0,
              "endLaneIndex": 0,
              "points": [
                {
                  "x": 611.0,
                  "y": 301.5
                },
                {
                  "x": 609.759,
                  "y": 301.249
                },
                {
                  "x": 608.292,
                  "y": 300.552
                },
                {
                  "x": 606.683,
                  "y": 299.493
                },
                {
                  "x": 605.016,
                  "y": 298.156
                },
                {
                  "x": 603.375,
                  "y": 296.625
                },
                {
                  "x": 601.844,
                  "y": 294.984
                },
                {
                  "x": 600.507,
                  "y": 293.317
                },
                {
                  "x": 599.4479999999999,
                  "y": 291.70799999999997
                },
                {
                  "x": 598.751,
                  "y": 290.241
                },
                {
                  "x": 598.5,
                  "y": 289.0
                }
              ]
            },
            {
              "startLaneIndex": 0,
              "endLaneIndex": 1,
              "points": [
                {
                  "x": 611.0,
                  "y": 301.5
                },
                {
                  "x": 609.675,
                  "y": 301.249
                },
                {
                  "x": 607.98,
                  "y": 300.552
                },
                {
                  "x": 606.035,
                  "y": 299.493
                },
                {
                  "x": 603.96,
                  "y": 298.156
                },
                {
                  "x": 601.875,
                  "y": 296.625
                },
                {
                  "x": 599.9,
                  "y": 294.984
                },
                {
                  "x": 598.155,
                  "y": 293.317
                },
                {
                  "x": 596.7599999999999,
                  "y": 291.70799999999997
                },
                {
                  "x": 595.835,
                  "y": 290.241
                },
                {
                  "x": 595.5,
                  "y": 289.0
                }
              ]
            },
            {
              "startLaneIndex": 0,
              "endLaneIndex": 2,
              "points": [
                {
                  "x": 611.0,
                  "y": 301.5
                },
                {
                  "x": 609.591,
                  "y": 301.249
                },
                {
                  "x": 607.668,
                  "y": 300.552
                },
                {
                  "x": 605.387,
                  "y": 299.493
                },
                {
                  "x": 602.904,
                  "y": 298.156
                },
                {
                  "x": 600.375,
                  "y": 296.625
                },
                {
                  "x": 597.956,
                  "y": 294.984
                },
                {
                  "x": 595.803,
                  "y": 293.317
                },
                {
                  "x": 594.0719999999999,
                  "y": 291.70799999999997
                },
                {
                  "x": 592.919,
                  "y": 290.241
                },
                {
                  "x": 592.5,
                  "y": 289.0
                }
              ]
            }
          ]
        },
        {
          "type": "turn_left",
          "startRoad": "road_3_3_3",
          "endRoad": "road_3_2_0",
          "direction": 3,
          "laneLinks": [
            {
              "startLaneIndex": 0,
              "endLaneIndex": 0,
              "points": [
                {
                  "x": 598.5,
                  "y": 311.0
                },
                {
                  "x": 598.751,
                  "y": 309.759
                },
                {
                  "x": 599.448,
                  "y": 308.292
                },
                {
                  "x": 600.507,
                  "y": 306.683
                },
                {
                  "x": 601.844,
                  "y": 305.016
                },
                {
                  "x": 603.375,
                  "y": 303.375
                },
                {
                  "x": 605.016,
                  "y": 301.844
                },
                {
                  "x": 606.683,
                  "y": 300.507
                },
                {
                  "x": 608.2919999999999,
                  "y": 299.448
                },
                {
                  "x": 609.759,
                  "y": 298.75100000000003
                },
                {
                  "x": 611.0,
                  "y": 298.5
                }
              ]
            },
            {
              "startLaneIndex": 0,
              "endLaneIndex": 1,
              "points": [
                {
                  "x": 598.5,
                  "y": 311.0
                },
                {
                  "x": 598.751,
                  "y": 309.675
                },
                {
                  "x": 599.448,
                  "y": 307.98
                },
                {
                  "x": 600.507,
                  "y": 306.03499999999997
                },
                {
                  "x": 601.844,
                  "y": 303.96
                },
                {
                  "x": 603.375,
                  "y": 301.875
                },
                {
                  "x": 605.016,
                  "y": 299.9
                },
                {
                  "x": 606.683,
                  "y": 298.155
                },
                {
                  "x": 608.2919999999999,
                  "y": 296.76
                },
                {
                  "x": 609.759,
                  "y": 295.83500000000004
                },
                {
                  "x": 611.0,
                  "y": 295.5
                }
              ]
            },
            {
              "startLaneIndex": 0,
              "endLaneIndex": 2,
              "points": [
                {
                  "x": 598.5,
                  "y": 311.0
                },
                {
                  "x": 598.751,
                  "y": 309.591
                },
                {
                  "x": 599.448,
                  "y": 307.668
                },
                {
                  "x": 600.507,
                  "y": 305.387
                },
                {
                  "x": 601.844,
                  "y": 302.904
                },
                {
                  "x": 603.375,
                  "y": 300.375
                },
                {
                  "x": 605.016,
                  "y": 297.956
                },
                {
                  "x": 606.683,
                  "y": 295.803
                },
                {
                  "x": 608.2919999999999,
                  "y": 294.072
                },
                {
                  "x": 609.759,
                  "y": 292.919
                },
                {
                  "x": 611.0,
                  "y": 292.5
                }
              ]
            }
          ]
        },
        {
          "type": "turn_right",
          "startRoad": "road_3_3_3",
          "endRoad": "road_3_2_2",
          "direction": 3,
          "laneLinks": [
            {
              "startLaneIndex": 2,
              "endLaneIndex": 0,
              "points": [
                {
                  "x": 592.5,
                  "y": 311.0
                },
                {
                  "x": 592.501,
                  "y": 309.843
                },
                {
                  "x": 592.488,
                  "y": 308.604
                },
                {
                  "x": 592.437,
                  "y": 307.331
                },
                {
                  "x": 592.324,
                  "y": 306.072
                },
                {
                  "x": 592.125,
                  "y": 304.875
                },
                {
                  "x": 591.816,
                  "y": 303.788
                },
                {
                  "x": 591.373,
                  "y": 302.859
                },
                {
                  "x": 590.7719999999999,
                  "y": 302.136
                },
                {
                  "x": 589.989,
                  "y": 301.66700000000003
                },
                {
                  "x": 589.0,
                  "y": 301.5
                }
              ]
            },
            {
              "startLaneIndex": 2,
              "endLaneIndex": 1,
              "points": [
                {
                  "x": 592.5,
                  "y": 311.0
                },
                {
                  "x": 592.501,
                  "y": 309.927
                },
                {
                  "x": 592.488,
                  "y": 308.916
                },
                {
                  "x": 592.437,
                  "y": 307.979
                },
                {
                  "x": 592.324,
                  "y": 307.128
                },
                {
                  "x": 592.125,
                  "y": 306.375
                },
                {
                  "x": 591.816,
                  "y": 305.73199999999997
                },
                {
                  "x": 591.373,
                  "y": 305.211
                },
                {
                  "x": 590.7719999999999,
                  "y": 304.824
                },
                {
                  "x": 589.989,
                  "y": 304.583
                },
                {
                  "x": 589.0,
                  "y": 304.5
                }
              ]
            },
            {
              "startLaneIndex": 2,
              "endLaneIndex": 2,
              "points": [
                {
                  "x": 592.5,
                  "y": 311.0
                },
                {
                  "x": 592.501,
                  "y": 310.011
                },
                {
                  "x": 592.488,
                  "y": 309.228
                },
                {
                  "x": 592.437,
                  "y": 308.627
                },
                {
                  "x": 592.324,
                  "y": 308.18399999999997
                },
                {
                  "x": 592.125,
                  "y": 307.875
                },
                {
                  "x": 591.816,
                  "y": 307.676
                },
                {
                  "x": 591.373,
                  "y": 307.563
                },
                {
                  "x": 590.7719999999999,
                  "y": 307.512
                },
                {
                  "x": 589.989,
                  "y": 307.499
                },
                {
                  "x": 589.0,
                  "y": 307.5
                }
              ]
            }
          ]
        },
        {
          "type": "go_straight",
          "startRoad": "road_3_3_3",
          "endRoad": "road_3_2_3",
          "direction": 3,
          "laneLinks": [
            {
              "startLaneIndex": 1,
              "endLaneIndex": 0,
              "points": [
                {
                  "x": 595.5,
                  "y": 311.0
                },
                {
                  "x": 595.584,
                  "y": 309.592
                },
                {
                  "x": 595.812,
                  "y": 307.656
                },
                {
                  "x": 596.148,
                  "y": 305.324
                },
                {
                  "x": 596.556,
                  "y": 302.728
                },
                {
                  "x": 597.0,
                  "y": 300.0
                },
                {
                  "x": 597.444,
                  "y": 297.272
                },
                {
                  "x": 597.852,
                  "y": 294.676
                },
                {
                  "x": 598.1879999999999,
                  "y": 292.344
                },
                {
                  "x": 598.4159999999999,
                  "y": 290.408
                },
                {
                  "x": 598.5,
                  "y": 289.0
                }
              ]
            },
            {
              "startLaneIndex": 1,
              "endLaneIndex": 1,
              "points": [
                {
                  "x": 595.5,
                  "y": 311.0
                },
                {
                  "x": 595.5,
                  "y": 309.592
                },
                {
                  "x": 595.5,
                  "y": 307.656
                },
                {
                  "x": 595.5,
                  "y": 305.324
                },
                {
                  "x": 595.5,
                  "y": 302.728
                },
                {
                  "x": 595.5,
                  "y": 300.0
                },
                {
                  "x": 595.5,
                  "y": 297.272
                },
                {
                  "x": 595.5,
                  "y": 294.676
                },
                {
                  "x": 595.4999999999999,
                  "y": 292.344
                },
                {
                  "x": 595.5,
                  "y": 290.408
                },
                {
                  "x": 595.5,
                  "y": 289.0
                }
              ]
            },
            {
              "startLaneIndex": 1,
              "endLaneIndex": 2,
              "points": [
                {
[truncated: 82,034 more chars]
