# Supplementary material
Source: ML conference proceedings conference paper supplement (https://proceedings.neurips.cc/paper_files/paper/2021/hash/654516d1b4df6917094de807156adc14-Abstract.html)
Supplement: Supplementary file 1 [file 654516d1b4df6917094de807156adc14-Supplemental.zip › neurips-supplementary/codes/data/template_lsr/6_6/anon_6_6_300_0.3_uni.json]

[
  {
    "vehicle": {
      "length": 5.0,
      "width": 2.0,
      "maxPosAcc": 2.0,
      "maxNegAcc": 4.5,
      "usualPosAcc": 2.0,
      "usualNegAcc": 4.5,
      "minGap": 2.5,
      "maxSpeed": 11.111,
      "headwayTime": 2
    },
    "route": [
      "road_0_1_0",
      "road_1_1_0",
      "road_2_1_0",
      "road_3_1_0",
      "road_4_1_0",
      "road_5_1_0",
      "road_6_1_0"
    ],
    "interval": 12.0,
    "startTime": 0,
    "endTime": 14400
  },
  {
    "vehicle": {
      "length": 5.0,
      "width": 2.0,
      "maxPosAcc": 2.0,
      "maxNegAcc": 4.5,
      "usualPosAcc": 2.0,
      "usualNegAcc": 4.5,
      "minGap": 2.5,
      "maxSpeed": 11.111,
      "headwayTime": 2
    },
    "route": [
      "road_0_2_0",
      "road_1_2_0",
      "road_2_2_0",
      "road_3_2_0",
      "road_4_2_0",
      "road_5_2_0",
      "road_6_2_0"
    ],
    "interval": 12.0,
    "startTime": 0,
    "endTime": 14400
  },
  {
    "vehicle": {
      "length": 5.0,
      "width": 2.0,
      "maxPosAcc": 2.0,
      "maxNegAcc": 4.5,
      "usualPosAcc": 2.0,
      "usualNegAcc": 4.5,
      "minGap": 2.5,
      "maxSpeed": 11.111,
      "headwayTime": 2
    },
    "route": [
      "road_0_3_0",
      "road_1_3_0",
      "road_2_3_0",
      "road_3_3_0",
      "road_4_3_0",
      "road_5_3_0",
      "road_6_3_0"
    ],
    "interval": 12.0,
    "startTime": 0,
    "endTime": 14400
  },
  {
    "vehicle": {
      "length": 5.0,
      "width": 2.0,
      "maxPosAcc": 2.0,
      "maxNegAcc": 4.5,
      "usualPosAcc": 2.0,
      "usualNegAcc": 4.5,
      "minGap": 2.5,
      "maxSpeed": 11.111,
      "headwayTime": 2
    },
    "route": [
      "road_0_4_0",
      "road_1_4_0",
      "road_2_4_0",
      "road_3_4_0",
      "road_4_4_0",
      "road_5_4_0",
      "road_6_4_0"
    ],
    "interval": 12.0,
    "startTime": 0,
    "endTime": 14400
  },
  {
    "vehicle": {
      "length": 5.0,
      "width": 2.0,
      "maxPosAcc": 2.0,
      "maxNegAcc": 4.5,
      "usualPosAcc": 2.0,
      "usualNegAcc": 4.5,
      "minGap": 2.5,
      "maxSpeed": 11.111,
      "headwayTime": 2
    },
    "route": [
      "road_0_5_0",
      "road_1_5_0",
      "road_2_5_0",
      "road_3_5_0",
      "road_4_5_0",
      "road_5_5_0",
      "road_6_5_0"
    ],
    "interval": 12.0,
    "startTime": 0,
    "endTime": 14400
  },
  {
    "vehicle": {
      "length": 5.0,
      "width": 2.0,
      "maxPosAcc": 2.0,
      "maxNegAcc": 4.5,
      "usualPosAcc": 2.0,
      "usualNegAcc": 4.5,
      "minGap": 2.5,
      "maxSpeed": 11.111,
      "headwayTime": 2
    },
    "route": [
      "road_0_6_0",
      "road_1_6_0",
      "road_2_6_0",
      "road_3_6_0",
      "road_4_6_0",
      "road_5_6_0",
      "road_6_6_0"
    ],
    "interval": 12.0,
    "startTime": 0,
    "endTime": 14400
  },
  {
    "vehicle": {
      "length": 5.0,
      "width": 2.0,
      "maxPosAcc": 2.0,
      "maxNegAcc": 4.5,
      "usualPosAcc": 2.0,
      "usualNegAcc": 4.5,
      "minGap": 2.5,
      "maxSpeed": 11.111,
      "headwayTime": 2
    },
    "route": [
      "road_1_0_1",
      "road_1_1_1",
      "road_1_2_1",
      "road_1_3_1",
      "road_1_4_1",
      "road_1_5_1",
      "road_1_6_1"
    ],
    "interval": 40.0,
    "startTime": 0,
    "endTime": 14400
  },
  {
    "vehicle": {
      "length": 5.0,
      "width": 2.0,
      "maxPosAcc": 2.0,
      "maxNegAcc": 4.5,
      "usualPosAcc": 2.0,
      "usualNegAcc": 4.5,
      "minGap": 2.5,
      "maxSpeed": 11.111,
      "headwayTime": 2
    },
    "route": [
      "road_2_0_1",
      "road_2_1_1",
      "road_2_2_1",
      "road_2_3_1",
      "road_2_4_1",
      "road_2_5_1",
      "road_2_6_1"
    ],
    "interval": 40.0,
    "startTime": 0,
    "endTime": 14400
  },
  {
    "vehicle": {
      "length": 5.0,
      "width": 2.0,
      "maxPosAcc": 2.0,
      "maxNegAcc": 4.5,
      "usualPosAcc": 2.0,
      "usualNegAcc": 4.5,
      "minGap": 2.5,
      "maxSpeed": 11.111,
      "headwayTime": 2
    },
    "route": [
      "road_3_0_1",
      "road_3_1_1",
      "road_3_2_1",
      "road_3_3_1",
      "road_3_4_1",
      "road_3_5_1",
      "road_3_6_1"
    ],
    "interval": 40.0,
    "startTime": 0,
    "endTime": 14400
  },
  {
    "vehicle": {
      "length": 5.0,
      "width": 2.0,
      "maxPosAcc": 2.0,
      "maxNegAcc": 4.5,
      "usualPosAcc": 2.0,
      "usualNegAcc": 4.5,
      "minGap": 2.5,
      "maxSpeed": 11.111,
      "headwayTime": 2
    },
    "route": [
      "road_4_0_1",
      "road_4_1_1",
      "road_4_2_1",
      "road_4_3_1",
      "road_4_4_1",
      "road_4_5_1",
      "road_4_6_1"
    ],
    "interval": 40.0,
    "startTime": 0,
    "endTime": 14400
  },
  {
    "vehicle": {
      "length": 5.0,
      "width": 2.0,
      "maxPosAcc": 2.0,
      "maxNegAcc": 4.5,
      "usualPosAcc": 2.0,
      "usualNegAcc": 4.5,
      "minGap": 2.5,
      "maxSpeed": 11.111,
      "headwayTime": 2
    },
    "route": [
      "road_5_0_1",
      "road_5_1_1",
      "road_5_2_1",
      "road_5_3_1",
      "road_5_4_1",
      "road_5_5_1",
      "road_5_6_1"
    ],
    "interval": 40.0,
    "startTime": 0,
    "endTime": 14400
  },
  {
    "vehicle": {
      "length": 5.0,
      "width": 2.0,
      "maxPosAcc": 2.0,
      "maxNegAcc": 4.5,
      "usualPosAcc": 2.0,
      "usualNegAcc": 4.5,
      "minGap": 2.5,
      "maxSpeed": 11.111,
      "headwayTime": 2
    },
    "route": [
      "road_6_0_1",
      "road_6_1_1",
      "road_6_2_1",
      "road_6_3_1",
      "road_6_4_1",
      "road_6_5_1",
      "road_6_6_1"
    ],
    "interval": 40.0,
    "startTime": 0,
    "endTime": 14400
  }
]
