# Supplementary material
Source: ML conference proceedings conference paper supplement (https://proceedings.neurips.cc/paper_files/paper/2021/hash/654516d1b4df6917094de807156adc14-Abstract.html)
Supplement: Supplementary file 1 [file 654516d1b4df6917094de807156adc14-Supplemental.zip › neurips-supplementary/codes/data/template_lsr/6_6/roadnet_6_6.json]

{
  "intersections": [
    {
      "id": "intersection_0_1",
      "point": {
        "x": -300,
        "y": 0
      },
      "width": 0,
      "roads": [
        "road_1_1_2",
        "road_0_1_0"
      ],
      "roadLinks": [],
      "trafficLight": {
        "roadLinkIndices": [],
        "lightphases": [
          {
            "time": 5,
            "availableRoadLinks": []
          },
          {
            "time": 30,
            "availableRoadLinks": []
          },
          {
            "time": 30,
            "availableRoadLinks": []
          },
          {
            "time": 30,
            "availableRoadLinks": []
          },
          {
            "time": 30,
            "availableRoadLinks": []
          },
          {
            "time": 30,
            "availableRoadLinks": []
          },
          {
            "time": 30,
            "availableRoadLinks": []
          },
          {
            "time": 30,
            "availableRoadLinks": []
          },
          {
            "time": 30,
            "availableRoadLinks": []
          }
        ]
      },
      "virtual": true
    },
    {
      "id": "intersection_0_2",
      "point": {
        "x": -300,
        "y": 300
      },
      "width": 0,
      "roads": [
        "road_1_2_2",
        "road_0_2_0"
      ],
      "roadLinks": [],
      "trafficLight": {
        "roadLinkIndices": [],
        "lightphases": [
          {
            "time": 5,
            "availableRoadLinks": []
          },
          {
            "time": 30,
            "availableRoadLinks": []
          },
          {
            "time": 30,
            "availableRoadLinks": []
          },
          {
            "time": 30,
            "availableRoadLinks": []
          },
          {
            "time": 30,
            "availableRoadLinks": []
          },
          {
            "time": 30,
            "availableRoadLinks": []
          },
          {
            "time": 30,
            "availableRoadLinks": []
          },
          {
            "time": 30,
            "availableRoadLinks": []
          },
          {
            "time": 30,
            "availableRoadLinks": []
          }
        ]
      },
      "virtual": true
    },
    {
      "id": "intersection_0_3",
      "point": {
        "x": -300,
        "y": 600
      },
      "width": 0,
      "roads": [
        "road_1_3_2",
        "road_0_3_0"
      ],
      "roadLinks": [],
      "trafficLight": {
        "roadLinkIndices": [],
        "lightphases": [
          {
            "time": 5,
            "availableRoadLinks": []
          },
          {
            "time": 30,
            "availableRoadLinks": []
          },
          {
            "time": 30,
            "availableRoadLinks": []
          },
          {
            "time": 30,
            "availableRoadLinks": []
          },
          {
            "time": 30,
            "availableRoadLinks": []
          },
          {
            "time": 30,
            "availableRoadLinks": []
          },
          {
            "time": 30,
            "availableRoadLinks": []
          },
          {
            "time": 30,
            "availableRoadLinks": []
          },
          {
            "time": 30,
            "availableRoadLinks": []
          }
        ]
      },
      "virtual": true
    },
    {
      "id": "intersection_0_4",
      "point": {
        "x": -300,
        "y": 900
      },
      "width": 0,
      "roads": [
        "road_1_4_2",
        "road_0_4_0"
      ],
      "roadLinks": [],
      "trafficLight": {
        "roadLinkIndices": [],
        "lightphases": [
          {
            "time": 5,
            "availableRoadLinks": []
          },
          {
            "time": 30,
            "availableRoadLinks": []
          },
          {
            "time": 30,
            "availableRoadLinks": []
          },
          {
            "time": 30,
            "availableRoadLinks": []
          },
          {
            "time": 30,
            "availableRoadLinks": []
          },
          {
            "time": 30,
            "availableRoadLinks": []
          },
          {
            "time": 30,
            "availableRoadLinks": []
          },
          {
            "time": 30,
            "availableRoadLinks": []
          },
          {
            "time": 30,
            "availableRoadLinks": []
          }
        ]
      },
      "virtual": true
    },
    {
      "id": "intersection_0_5",
      "point": {
        "x": -300,
        "y": 1200
      },
      "width": 0,
      "roads": [
        "road_1_5_2",
        "road_0_5_0"
      ],
      "roadLinks": [],
      "trafficLight": {
        "roadLinkIndices": [],
        "lightphases": [
          {
            "time": 5,
            "availableRoadLinks": []
          },
          {
            "time": 30,
            "availableRoadLinks": []
          },
          {
            "time": 30,
            "availableRoadLinks": []
          },
          {
            "time": 30,
            "availableRoadLinks": []
          },
          {
            "time": 30,
            "availableRoadLinks": []
          },
          {
            "time": 30,
            "availableRoadLinks": []
          },
          {
            "time": 30,
            "availableRoadLinks": []
          },
          {
            "time": 30,
            "availableRoadLinks": []
          },
          {
            "time": 30,
            "availableRoadLinks": []
          }
        ]
      },
      "virtual": true
    },
    {
      "id": "intersection_0_6",
      "point": {
        "x": -300,
        "y": 1500
      },
      "width": 0,
      "roads": [
        "road_1_6_2",
        "road_0_6_0"
      ],
      "roadLinks": [],
      "trafficLight": {
        "roadLinkIndices": [],
        "lightphases": [
          {
            "time": 5,
            "availableRoadLinks": []
          },
          {
            "time": 30,
            "availableRoadLinks": []
          },
          {
            "time": 30,
            "availableRoadLinks": []
          },
          {
            "time": 30,
            "availableRoadLinks": []
          },
          {
            "time": 30,
            "availableRoadLinks": []
          },
          {
            "time": 30,
            "availableRoadLinks": []
          },
          {
            "time": 30,
            "availableRoadLinks": []
          },
          {
            "time": 30,
            "availableRoadLinks": []
          },
          {
            "time": 30,
            "availableRoadLinks": []
          }
        ]
      },
      "virtual": true
    },
    {
      "id": "intersection_1_0",
      "point": {
        "x": 0,
        "y": -300
      },
      "width": 0,
      "roads": [
        "road_1_1_3",
        "road_1_0_1"
      ],
      "roadLinks": [],
      "trafficLight": {
        "roadLinkIndices": [],
        "lightphases": [
          {
            "time": 5,
            "availableRoadLinks": []
          },
          {
            "time": 30,
            "availableRoadLinks": []
          },
          {
            "time": 30,
            "availableRoadLinks": []
          },
          {
            "time": 30,
            "availableRoadLinks": []
          },
          {
            "time": 30,
            "availableRoadLinks": []
          },
          {
            "time": 30,
            "availableRoadLinks": []
          },
          {
            "time": 30,
            "availableRoadLinks": []
          },
          {
            "time": 30,
            "availableRoadLinks": []
          },
          {
            "time": 30,
            "availableRoadLinks": []
          }
        ]
      },
      "virtual": true
    },
    {
      "id": "intersection_1_1",
      "point": {
        "x": 0,
        "y": 0
      },
      "width": 11,
      "roads": [
        "road_0_1_0",
        "road_1_0_1",
        "road_2_1_2",
        "road_1_2_3",
        "road_1_1_0",
        "road_1_1_1",
        "road_1_1_2",
        "road_1_1_3"
      ],
      "roadLinks": [
        {
          "type": "go_straight",
          "startRoad": "road_0_1_0",
          "endRoad": "road_1_1_0",
          "direction": 0,
          "laneLinks": [
            {
              "startLaneIndex": 1,
              "endLaneIndex": 0,
              "points": [
                {
                  "x": -11.0,
                  "y": -6.0
                },
                {
                  "x": -9.592,
                  "y": -5.888
                },
                {
                  "x": -7.656,
                  "y": -5.584
                },
                {
                  "x": -5.324,
                  "y": -5.136
                },
                {
                  "x": -2.7279999999999998,
                  "y": -4.592
                },
                {
                  "x": 0.0,
                  "y": -4.0
                },
                {
                  "x": 2.7279999999999998,
                  "y": -3.408
                },
                {
                  "x": 5.323999999999999,
                  "y": -2.864
                },
                {
                  "x": 7.655999999999999,
                  "y": -2.415999999999999
                },
                {
                  "x": 9.592,
                  "y": -2.112
                },
                {
                  "x": 11.0,
                  "y": -2.0
                }
              ]
            },
            {
              "startLaneIndex": 1,
              "endLaneIndex": 1,
              "points": [
                {
                  "x": -11.0,
                  "y": -6.0
                },
                {
                  "x": -9.592,
                  "y": -6.0
                },
                {
                  "x": -7.656,
                  "y": -6.0
                },
                {
                  "x": -5.324,
                  "y": -6.0
                },
                {
                  "x": -2.7279999999999998,
                  "y": -6.0
                },
                {
                  "x": 0.0,
                  "y": -6.0
                },
                {
                  "x": 2.7279999999999998,
                  "y": -6.0
                },
                {
                  "x": 5.323999999999999,
                  "y": -6.0
                },
                {
                  "x": 7.655999999999999,
                  "y": -5.999999999999999
                },
                {
                  "x": 9.592,
                  "y": -6.0
                },
                {
                  "x": 11.0,
                  "y": -6.0
                }
              ]
            },
            {
              "startLaneIndex": 1,
              "endLaneIndex": 2,
              "points": [
                {
                  "x": -11.0,
                  "y": -6.0
                },
                {
                  "x": -9.592,
                  "y": -6.112
                },
                {
                  "x": -7.656,
                  "y": -6.416
                },
                {
                  "x": -5.324,
                  "y": -6.864
                },
                {
                  "x": -2.7279999999999998,
                  "y": -7.408
                },
                {
                  "x": 0.0,
                  "y": -8.0
                },
                {
                  "x": 2.7279999999999998,
                  "y": -8.592
                },
                {
                  "x": 5.323999999999999,
                  "y": -9.136
                },
                {
                  "x": 7.655999999999999,
                  "y": -9.584
                },
                {
                  "x": 9.592,
                  "y": -9.888
                },
                {
                  "x": 11.0,
                  "y": -10.0
                }
              ]
            }
          ]
        },
        {
          "type": "turn_left",
          "startRoad": "road_0_1_0",
          "endRoad": "road_1_1_1",
          "direction": 0,
          "laneLinks": [
            {
              "startLaneIndex": 0,
              "endLaneIndex": 0,
              "points": [
                {
                  "x": -11.0,
                  "y": -2.0
                },
                {
                  "x": -9.745,
                  "y": -1.7349999999999999
                },
                {
                  "x": -8.24,
                  "y": -1.0
                },
                {
                  "x": -6.575,
                  "y": 0.115
                },
                {
                  "x": -4.84,
                  "y": 1.52
                },
                {
                  "x": -3.125,
                  "y": 3.125
                },
                {
                  "x": -1.52,
                  "y": 4.84
                },
                {
                  "x": -0.115000000000001,
                  "y": 6.575
                },
                {
                  "x": 0.999999999999999,
                  "y": 8.24
                },
                {
                  "x": 1.735,
                  "y": 9.745
                },
                {
                  "x": 2.0,
                  "y": 11.0
                }
              ]
            },
            {
              "startLaneIndex": 0,
              "endLaneIndex": 1,
              "points": [
                {
                  "x": -11.0,
                  "y": -2.0
                },
                {
                  "x": -9.633,
                  "y": -1.7349999999999999
                },
                {
                  "x": -7.824,
                  "y": -1.0
                },
                {
                  "x": -5.711,
                  "y": 0.115
                },
                {
                  "x": -3.432,
                  "y": 1.52
                },
                {
                  "x": -1.125,
                  "y": 3.125
                },
                {
                  "x": 1.072,
                  "y": 4.84
                },
                {
                  "x": 3.020999999999999,
                  "y": 6.575
                },
                {
                  "x": 4.583999999999999,
                  "y": 8.24
                },
                {
                  "x": 5.623,
                  "y": 9.745
                },
                {
                  "x": 6.0,
                  "y": 11.0
                }
              ]
            },
            {
              "startLaneIndex": 0,
              "endLaneIndex": 2,
              "points": [
                {
                  "x": -11.0,
                  "y": -2.0
                },
                {
                  "x": -9.521,
                  "y": -1.7349999999999999
                },
                {
                  "x": -7.408,
                  "y": -1.0
                },
                {
                  "x": -4.8469999999999995,
                  "y": 0.115
                },
                {
                  "x": -2.024,
                  "y": 1.52
                },
                {
                  "x": 0.875,
                  "y": 3.125
                },
                {
                  "x": 3.664,
                  "y": 4.84
                },
                {
                  "x": 6.156999999999999,
                  "y": 6.575
                },
                {
                  "x": 8.168,
                  "y": 8.24
                },
                {
                  "x": 9.511,
                  "y": 9.745
                },
                {
                  "x": 10.0,
                  "y": 11.0
                }
              ]
            }
          ]
        },
        {
          "type": "turn_right",
          "startRoad": "road_0_1_0",
          "endRoad": "road_1_1_3",
          "direction": 0,
          "laneLinks": [
            {
              "startLaneIndex": 2,
              "endLaneIndex": 0,
              "points": [
                {
                  "x": -11.0,
                  "y": -10.0
                },
                {
                  "x": -9.857,
                  "y": -9.929
                },
                {
                  "x": -8.656,
                  "y": -9.752
                },
                {
                  "x": -7.439,
                  "y": -9.523
                },
                {
                  "x": -6.248,
                  "y": -9.296
                },
                {
                  "x": -5.125,
                  "y": -9.125
                },
                {
                  "x": -4.112,
                  "y": -9.064
                },
                {
                  "x": -3.251000000000001,
                  "y": -9.167
                },
                {
                  "x": -2.584000000000001,
                  "y": -9.488
                },
                {
                  "x": -2.153,
                  "y": -10.081
                },
                {
                  "x": -2.0,
                  "y": -11.0
                }
              ]
            },
            {
              "startLaneIndex": 2,
              "endLaneIndex": 1,
              "points": [
                {
                  "x": -11.0,
                  "y": -10.0
                },
                {
                  "x": -9.969,
                  "y": -9.929
                },
                {
                  "x": -9.072,
                  "y": -9.752
                },
                {
                  "x": -8.303,
                  "y": -9.523
                },
                {
                  "x": -7.656,
                  "y": -9.296
                },
                {
                  "x": -7.125,
                  "y": -9.125
                },
                {
                  "x": -6.704,
                  "y": -9.064
                },
                {
                  "x": -6.387000000000001,
                  "y": -9.167
                },
                {
                  "x": -6.168000000000001,
                  "y": -9.488
                },
                {
                  "x": -6.0409999999999995,
                  "y": -10.081
                },
                {
                  "x": -6.0,
                  "y": -11.0
                }
              ]
            },
            {
              "startLaneIndex": 2,
              "endLaneIndex": 2,
              "points": [
                {
                  "x": -11.0,
                  "y": -10.0
                },
                {
                  "x": -10.081,
                  "y": -9.929
                },
                {
                  "x": -9.488,
                  "y": -9.752
                },
                {
                  "x": -9.167,
                  "y": -9.523
                },
                {
                  "x": -9.064,
                  "y": -9.296
                },
                {
                  "x": -9.125,
                  "y": -9.125
                },
                {
                  "x": -9.296,
                  "y": -9.064
                },
                {
                  "x": -9.523000000000001,
                  "y": -9.167
                },
                {
                  "x": -9.752,
                  "y": -9.488
                },
                {
                  "x": -9.929,
                  "y": -10.081
                },
                {
                  "x": -10.0,
                  "y": -11.0
                }
              ]
            }
          ]
        },
        {
          "type": "turn_right",
          "startRoad": "road_1_0_1",
          "endRoad": "road_1_1_0",
          "direction": 1,
          "laneLinks": [
            {
              "startLaneIndex": 2,
              "endLaneIndex": 0,
              "points": [
                {
                  "x": 10.0,
                  "y": -11.0
                },
                {
                  "x": 9.929,
                  "y": -9.857
                },
                {
                  "x": 9.752,
                  "y": -8.656
                },
                {
                  "x": 9.523,
                  "y": -7.439
                },
                {
                  "x": 9.296,
                  "y": -6.248
                },
                {
                  "x": 9.125,
                  "y": -5.125
                },
                {
                  "x": 9.064,
                  "y": -4.112
                },
                {
                  "x": 9.167,
                  "y": -3.251000000000001
                },
                {
                  "x": 9.488,
                  "y": -2.584000000000001
                },
                {
                  "x": 10.081,
                  "y": -2.153
                },
                {
                  "x": 11.0,
                  "y": -2.0
                }
              ]
            },
            {
              "startLaneIndex": 2,
              "endLaneIndex": 1,
              "points": [
                {
                  "x": 10.0,
                  "y": -11.0
                },
                {
                  "x": 9.929,
                  "y": -9.969
                },
                {
                  "x": 9.752,
                  "y": -9.072
                },
                {
                  "x": 9.523,
                  "y": -8.303
                },
                {
                  "x": 9.296,
                  "y": -7.656
                },
                {
                  "x": 9.125,
                  "y": -7.125
                },
                {
                  "x": 9.064,
                  "y": -6.704
                },
                {
                  "x": 9.167,
                  "y": -6.387000000000001
                },
                {
                  "x": 9.488,
                  "y": -6.168000000000001
                },
                {
                  "x": 10.081,
                  "y": -6.0409999999999995
                },
                {
                  "x": 11.0,
                  "y": -6.0
                }
              ]
            },
            {
              "startLaneIndex": 2,
              "endLaneIndex": 2,
              "points": [
                {
                  "x": 10.0,
                  "y": -11.0
                },
                {
                  "x": 9.929,
                  "y": -10.081
                },
                {
                  "x": 9.752,
                  "y": -9.488
                },
                {
                  "x": 9.523,
                  "y": -9.167
                },
                {
                  "x": 9.296,
                  "y": -9.064
                },
                {
                  "x": 9.125,
                  "y": -9.125
                },
                {
                  "x": 9.064,
                  "y": -9.296
                },
                {
                  "x": 9.167,
                  "y": -9.523000000000001
                },
                {
                  "x": 9.488,
                  "y": -9.752
                },
                {
                  "x": 10.081,
                  "y": -9.929
                },
                {
                  "x": 11.0,
                  "y": -10.0
                }
              ]
            }
          ]
        },
        {
          "type": "go_straight",
          "startRoad": "road_1_0_1",
          "endRoad": "road_1_1_1",
          "direction": 1,
          "laneLinks": [
            {
              "startLaneIndex": 1,
              "endLaneIndex": 0,
              "points": [
                {
                  "x": 6.0,
                  "y": -11.0
                },
                {
                  "x": 5.888,
                  "y": -9.592
                },
                {
                  "x": 5.584,
                  "y": -7.656
                },
                {
                  "x": 5.136,
                  "y": -5.324
                },
                {
                  "x": 4.592,
                  "y": -2.7279999999999998
                },
                {
                  "x": 4.0,
                  "y": 0.0
                },
                {
                  "x": 3.408,
                  "y": 2.7279999999999998
                },
                {
                  "x": 2.864,
                  "y": 5.323999999999999
                },
                {
                  "x": 2.415999999999999,
                  "y": 7.655999999999999
                },
                {
                  "x": 2.112,
                  "y": 9.592
                },
                {
                  "x": 2.0,
                  "y": 11.0
                }
              ]
            },
            {
              "startLaneIndex": 1,
              "endLaneIndex": 1,
              "points": [
                {
                  "x": 6.0,
                  "y": -11.0
                },
                {
                  "x": 6.0,
                  "y": -9.592
                },
                {
                  "x": 6.0,
                  "y": -7.656
                },
                {
                  "x": 6.0,
                  "y": -5.324
                },
                {
                  "x": 6.0,
                  "y": -2.7279999999999998
                },
                {
                  "x": 6.0,
                  "y": 0.0
                },
                {
                  "x": 6.0,
                  "y": 2.7279999999999998
                },
                {
                  "x": 6.0,
                  "y": 5.323999999999999
                },
                {
                  "x": 5.999999999999999,
                  "y": 7.655999999999999
                },
                {
                  "x": 6.0,
                  "y": 9.592
                },
                {
                  "x": 6.0,
                  "y": 11.0
                }
              ]
            },
            {
              "startLaneIndex": 1,
              "endLaneIndex": 2,
              "points": [
                {
                  "x": 6.0,
                  "y": -11.0
                },
                {
                  "x": 6.112,
                  "y": -9.592
                },
                {
                  "x": 6.416,
                  "y": -7.656
                },
                {
                  "x": 6.864,
                  "y": -5.324
                },
                {
                  "x": 7.408,
                  "y": -2.7279999999999998
                },
                {
                  "x": 8.0,
                  "y": 0.0
                },
                {
                  "x": 8.592,
                  "y": 2.7279999999999998
                },
                {
                  "x": 9.136,
                  "y": 5.323999999999999
                },
                {
                  "x": 9.584,
                  "y": 7.655999999999999
                },
                {
                  "x": 9.888,
                  "y": 9.592
                },
                {
                  "x": 10.0,
                  "y": 11.0
                }
              ]
            }
          ]
        },
        {
          "type": "turn_left",
          "startRoad": "road_1_0_1",
          "endRoad": "road_1_1_2",
          "direction": 1,
          "laneLinks": [
            {
              "startLaneIndex": 0,
              "endLaneIndex": 0,
              "points": [
                {
                  "x": 2.0,
                  "y": -11.0
                },
                {
                  "x": 1.7349999999999999,
                  "y": -9.745
                },
                {
                  "x": 1.0,
                  "y": -8.24
                },
                {
                  "x": -0.115,
                  "y": -6.575
                },
                {
                  "x": -1.52,
                  "y": -4.84
                },
                {
                  "x": -3.125,
                  "y": -3.125
                },
                {
                  "x": -4.84,
                  "y": -1.52
                },
                {
                  "x": -6.575,
                  "y": -0.115000000000001
                },
                {
                  "x": -8.24,
                  "y": 0.999999999999999
                },
                {
                  "x": -9.745,
                  "y": 1.735
                },
                {
                  "x": -11.0,
                  "y": 2.0
                }
              ]
            },
            {
              "startLaneIndex": 0,
              "endLaneIndex": 1,
              "points": [
                {
                  "x": 2.0,
                  "y": -11.0
                },
                {
                  "x": 1.7349999999999999,
                  "y": -9.633
                },
                {
                  "x": 1.0,
                  "y": -7.824
                },
                {
                  "x": -0.115,
                  "y": -5.711
                },
                {
                  "x": -1.52,
                  "y": -3.432
                },
                {
                  "x": -3.125,
                  "y": -1.125
                },
                {
                  "x": -4.84,
                  "y": 1.072
                },
                {
                  "x": -6.575,
                  "y": 3.020999999999999
                },
                {
                  "x": -8.24,
                  "y": 4.583999999999999
                },
                {
                  "x": -9.745,
                  "y": 5.623
                },
                {
                  "x": -11.0,
                  "y": 6.0
                }
              ]
            },
            {
              "startLaneIndex": 0,
              "endLaneIndex": 2,
              "points": [
                {
                  "x": 2.0,
                  "y": -11.0
                },
                {
                  "x": 1.7349999999999999,
                  "y": -9.521
                },
                {
                  "x": 1.0,
                  "y": -7.408
                },
                {
                  "x": -0.115,
                  "y": -4.8469999999999995
                },
                {
                  "x": -1.52,
                  "y": -2.024
                },
                {
                  "x": -3.125,
                  "y": 0.875
                },
                {
                  "x": -4.84,
                  "y": 3.664
                },
                {
                  "x": -6.575,
                  "y": 6.156999999999999
                },
                {
                  "x": -8.24,
                  "y": 8.168
                },
                {
                  "x": -9.745,
                  "y": 9.511
                },
                {
                  "x": -11.0,
                  "y": 10.0
                }
              ]
            }
          ]
        },
        {
          "type": "turn_right",
          "startRoad": "road_2_1_2",
          "endRoad": "road_1_1_1",
          "direction": 2,
          "laneLinks": [
            {
              "startLaneIndex": 2,
              "endLaneIndex": 0,
              "points": [
                {
                  "x": 11.0,
                  "y": 10.0
                },
                {
                  "x": 9.857,
                  "y": 9.929
                },
                {
                  "x": 8.656,
                  "y": 9.752
                },
                {
                  "x": 7.439,
                  "y": 9.523
                },
                {
                  "x": 6.248,
                  "y": 9.296
                },
                {
                  "x": 5.125,
                  "y": 9.125
                },
                {
                  "x": 4.112,
                  "y": 9.064
                },
                {
                  "x": 3.251000000000001,
                  "y": 9.167
                },
                {
                  "x": 2.584000000000001,
                  "y": 9.488
                },
                {
                  "x": 2.153,
                  "y": 10.081
                },
                {
                  "x": 2.0,
                  "y": 11.0
                }
              ]
            },
            {
              "startLaneIndex": 2,
              "endLaneIndex": 1,
              "points": [
                {
                  "x": 11.0,
                  "y": 10.0
                },
                {
                  "x": 9.969,
                  "y": 9.929
                },
                {
                  "x": 9.072,
                  "y": 9.752
                },
                {
                  "x": 8.303,
                  "y": 9.523
                },
                {
                  "x": 7.656,
                  "y": 9.296
                },
                {
                  "x": 7.125,
                  "y": 9.125
                },
                {
                  "x": 6.704,
                  "y": 9.064
                },
                {
                  "x": 6.387000000000001,
                  "y": 9.167
                },
                {
                  "x": 6.168000000000001,
                  "y": 9.488
                },
                {
                  "x": 6.0409999999999995,
                  "y": 10.081
                },
                {
                  "x": 6.0,
                  "y": 11.0
                }
              ]
            },
            {
              "startLaneIndex": 2,
              "endLaneIndex": 2,
              "points": [
                {
                  "x": 11.0,
                  "y": 10.0
                },
                {
                  "x": 10.081,
                  "y": 9.929
                },
                {
                  "x": 9.488,
                  "y": 9.752
                },
                {
                  "x": 9.167,
                  "y": 9.523
                },
                {
                  "x": 9.064,
                  "y": 9.296
                },
                {
                  "x": 9.125,
                  "y": 9.125
                },
                {
                  "x": 9.296,
                  "y": 9.064
                },
                {
                  "x": 9.523000000000001,
                  "y": 9.167
                },
                {
                  "x": 9.752,
                  "y": 9.488
                },
                {
                  "x": 9.929,
                  "y": 10.081
                },
                {
                  "x": 10.0,
                  "y": 11.0
                }
              ]
            }
          ]
        },
        {
          "type": "go_straight",
          "startRoad": "road_2_1_2",
          "endRoad": "road_1_1_2",
          "direction": 2,
          "laneLinks": [
            {
              "startLaneIndex": 1,
              "endLaneIndex": 0,
              "points": [
                {
                  "x": 11.0,
                  "y": 6.0
                },
                {
                  "x": 9.592,
                  "y": 5.888
                },
                {
                  "x": 7.656,
                  "y": 5.584
                },
                {
                  "x": 5.324,
                  "y": 5.136
                },
                {
                  "x": 2.7279999999999998,
                  "y": 4.592
                },
                {
                  "x": 0.0,
                  "y": 4.0
                },
                {
                  "x": -2.7279999999999998,
                  "y": 3.408
                },
                {
                  "x": -5.323999999999999,
                  "y": 2.864
                },
                {
                  "x": -7.655999999999999,
                  "y": 2.415999999999999
                },
                {
                  "x": -9.592,
                  "y": 2.112
                },
                {
                  "x": -11.0,
                  "y": 2.0
                }
              ]
            },
            {
              "startLaneIndex": 1,
              "endLaneIndex": 1,
              "points": [
                {
                  "x": 11.0,
                  "y": 6.0
                },
                {
                  "x": 9.592,
                  "y": 6.0
                },
                {
                  "x": 7.656,
                  "y": 6.0
                },
                {
                  "x": 5.324,
                  "y": 6.0
                },
                {
                  "x": 2.7279999999999998,
                  "y": 6.0
                },
                {
                  "x": 0.0,
                  "y": 6.0
                },
                {
                  "x": -2.7279999999999998,
                  "y": 6.0
                },
                {
                  "x": -5.323999999999999,
                  "y": 6.0
                },
                {
                  "x": -7.655999999999999,
                  "y": 5.999999999999999
                },
                {
                  "x": -9.592,
                  "y": 6.0
                },
                {
                  "x": -11.0,
                  "y": 6.0
                }
              ]
            },
            {
              "startLaneIndex": 1,
              "endLaneIndex": 2,
              "points": [
                {
                  "x": 11.0,
                  "y": 6.0
                },
                {
                  "x": 9.592,
                  "y": 6.112
                },
                {
                  "x": 7.656,
                  "y": 6.416
                },
                {
                  "x": 5.324,
                  "y": 6.864
                },
                {
                  "x": 2.7279999999999998,
                  "y": 7.408
                },
                {
                  "x": 0.0,
                  "y": 8.0
                },
                {
                  "x": -2.7279999999999998,
                  "y": 8.592
                },
                {
                  "x": -5.323999999999999,
                  "y": 9.136
                },
                {
                  "x": -7.655999999999999,
                  "y": 9.584
                },
                {
                  "x": -9.592,
                  "y": 9.888
                },
                {
                  "x": -11.0,
                  "y": 10.0
                }
              ]
            }
          ]
        },
        {
          "type": "turn_left",
          "startRoad": "road_2_1_2",
          "endRoad": "road_1_1_3",
          "direction": 2,
          "laneLinks": [
            {
              "startLaneIndex": 0,
              "endLaneIndex": 0,
              "points": [
                {
                  "x": 11.0,
                  "y": 2.0
                },
                {
                  "x": 9.745,
                  "y": 1.7349999999999999
                },
                {
                  "x": 8.24,
                  "y": 1.0
                },
                {
                  "x": 6.575,
                  "y": -0.115
                },
                {
                  "x": 4.84,
                  "y": -1.52
                },
                {
                  "x": 3.125,
                  "y": -3.125
                },
                {
                  "x": 1.52,
                  "y": -4.84
                },
                {
                  "x": 0.115000000000001,
                  "y": -6.575
                },
                {
                  "x": -0.999999999999999,
                  "y": -8.24
                },
                {
                  "x": -1.735,
                  "y": -9.745
                },
                {
                  "x": -2.0,
                  "y": -11.0
                }
              ]
            },
            {
              "startLaneIndex": 0,
              "endLaneIndex": 1,
              "points": [
                {
                  "x": 11.0,
                  "y": 2.0
                },
                {
                  "x": 9.633,
                  "y": 1.7349999999999999
                },
                {
                  "x": 7.824,
                  "y": 1.0
                },
                {
                  "x": 5.711,
                  "y": -0.115
                },
                {
                  "x": 3.432,
                  "y": -1.52
                },
                {
                  "x": 1.125,
                  "y": -3.125
                },
                {
                  "x": -1.072,
                  "y": -4.84
                },
                {
                  "x": -3.020999999999999,
                  "y": -6.575
                },
                {
                  "x": -4.583999999999999,
                  "y": -8.24
                },
                {
                  "x": -5.623,
                  "y": -9.745
                },
                {
                  "x": -6.0,
                  "y": -11.0
                }
              ]
            },
            {
              "startLaneIndex": 0,
              "endLaneIndex": 2,
              "points": [
                {
                  "x": 11.0,
                  "y": 2.0
                },
                {
                  "x": 9.521,
                  "y": 1.7349999999999999
                },
                {
                  "x": 7.408,
                  "y": 1.0
                },
                {
                  "x": 4.8469999999999995,
                  "y": -0.115
                },
                {
                  "x": 2.024,
                  "y": -1.52
                },
                {
                  "x": -0.875,
                  "y": -3.125
                },
                {
                  "x": -3.664,
                  "y": -4.84
                },
                {
                  "x": -6.156999999999999,
                  "y": -6.575
                },
                {
                  "x": -8.168,
                  "y": -8.24
                },
                {
                  "x": -9.511,
                  "y": -9.745
                },
                {
                  "x": -10.0,
                  "y": -11.0
                }
              ]
            }
          ]
        },
        {
          "type": "turn_left",
          "startRoad": "road_1_2_3",
          "endRoad": "road_1_1_0",
          "direction": 3,
          "laneLinks": [
            {
              "startLaneIndex": 0,
              "endLaneIndex": 0,
              "points": [
                {
                  "x": -2.0,
                  "y": 11.0
                },
                {
                  "x": -1.7349999999999999,
                  "y": 9.745
                },
                {
                  "x": -1.0,
                  "y": 8.24
                },
                {
                  "x": 0.115,
                  "y": 6.575
                },
                {
                  "x": 1.52,
                  "y": 4.84
                },
                {
                  "x": 3.125,
                  "y": 3.125
                },
                {
                  "x": 4.84,
                  "y": 1.52
                },
                {
                  "x": 6.575,
                  "y": 0.115000000000001
                },
                {
                  "x": 8.24,
                  "y": -0.999999999999999
                },
                {
                  "x": 9.745,
                  "y": -1.735
                },
                {
                  "x": 11.0,
                  "y": -2.0
                }
              ]
            },
            {
              "startLaneIndex": 0,
              "endLaneIndex": 1,
              "points": [
                {
                  "x": -2.0,
                  "y": 11.0
                },
                {
                  "x": -1.7349999999999999,
                  "y": 9.633
                },
                {
                  "x": -1.0,
                  "y": 7.824
                },
                {
                  "x": 0.115,
                  "y": 5.711
                },
                {
                  "x": 1.52,
                  "y": 3.432
                },
                {
                  "x": 3.125,
                  "y": 1.125
                },
                {
                  "x": 4.84,
                  "y": -1.072
                },
                {
                  "x": 6.575,
                  "y": -3.020999999999999
                },
                {
                  "x": 8.24,
                  "y": -4.583999999999999
                },
                {
                  "x": 9.745,
                  "y": -5.623
                },
                {
                  "x": 11.0,
                  "y": -6.0
                }
              ]
            },
            {
              "startLaneIndex": 0,
              "endLaneIndex": 2,
              "points": [
                {
                  "x": -2.0,
                  "y": 11.0
                },
                {
                  "x": -1.7349999999999999,
                  "y": 9.521
                },
                {
                  "x": -1.0,
                  "y": 7.408
                },
                {
                  "x": 0.115,
                  "y": 4.8469999999999995
                },
                {
                  "x": 1.52,
                  "y": 2.024
                },
                {
                  "x": 3.125,
                  "y": -0.875
                },
                {
                  "x": 4.84,
                  "y": -3.664
                },
                {
                  "x": 6.575,
                  "y": -6.156999999999999
                },
                {
                  "x": 8.24,
                  "y": -8.168
                },
                {
                  "x": 9.745,
                  "y": -9.511
                },
                {
                  "x": 11.0,
                  "y": -10.0
                }
              ]
            }
          ]
        },
        {
          "type": "turn_right",
          "startRoad": "road_1_2_3",
          "endRoad": "road_1_1_2",
          "direction": 3,
          "laneLinks": [
            {
              "startLaneIndex": 2,
              "endLaneIndex": 0,
              "points": [
                {
                  "x": -10.0,
                  "y": 11.0
                },
                {
                  "x": -9.929,
                  "y": 9.857
                },
                {
                  "x": -9.752,
                  "y": 8.656
                },
                {
                  "x": -9.523,
                  "y": 7.439
                },
                {
                  "x": -9.296,
                  "y": 6.248
                },
                {
                  "x": -9.125,
                  "y": 5.125
                },
                {
                  "x": -9.064,
                  "y": 4.112
                },
                {
                  "x": -9.167,
                  "y": 3.251000000000001
                },
                {
                  "x": -9.488,
                  "y": 2.584000000000001
                },
                {
                  "x": -10.081,
                  "y": 2.153
                },
                {
                  "x": -11.0,
                  "y": 2.0
                }
              ]
            },
            {
              "startLaneIndex": 2,
              "endLaneIndex": 1,
              "points": [
                {
                  "x": -10.0,
                  "y": 11.0
                },
                {
                  "x": -9.929,
                  "y": 9.969
                },
                {
                  "x": -9.752,
                  "y": 9.072
                },
                {
                  "x": -9.523,
                  "y": 8.303
                },
                {
                  "x": -9.296,
                  "y": 7.656
                },
                {
                  "x": -9.125,
                  "y": 7.125
                },
                {
                  "x": -9.064,
                  "y": 6.704
                },
                {
                  "x": -9.167,
                  "y": 6.387000000000001
                },
                {
                  "x": -9.488,
                  "y": 6.168000000000001
                },
                {
                  "x": -10.081,
                  "y": 6.0409999999999995
                },
                {
                  "x": -11.0,
                  "y": 6.0
                }
              ]
            },
            {
              "startLaneIndex": 2,
              "endLaneIndex": 2,
              "points": [
                {
                  "x": -10.0,
                  "y": 11.0
                },
                {
                  "x": -9.929,
                  "y": 10.081
                },
                {
                  "x": -9.752,
                  "y": 9.488
                },
                {
                  "x": -9.523,
                  "y": 9.167
                },
                {
                  "x": -9.296,
                  "y": 9.064
                },
                {
                  "x": -9.125,
                  "y": 9.125
                },
                {
                  "x": -9.064,
                  "y": 9.296
                },
                {
                  "x": -9.167,
                  "y": 9.523000000000001
                },
                {
                  "x": -9.488,
                  "y": 9.752
                },
                {
                  "x": -10.081,
                  "y": 9.929
                },
                {
                  "x": -11.0,
                  "y": 10.0
                }
              ]
            }
          ]
        },
        {
          "type": "go_straight",
          "startRoad": "road_1_2_3",
          "endRoad": "road_1_1_3",
          "direction": 3,
          "laneLinks": [
            {
              "startLaneIndex": 1,
              "endLaneIndex": 0,
              "points": [
                {
                  "x": -6.0,
                  "y": 11.0
                },
                {
                  "x": -5.888,
                  "y": 9.592
                },
                {
                  "x": -5.584,
                  "y": 7.656
                },
                {
                  "x": -5.136,
                  "y": 5.324
                },
                {
                  "x": -4.592,
                  "y": 2.7279999999999998
                },
                {
                  "x": -4.0,
                  "y": 0.0
                },
                {
                  "x": -3.408,
                  "y": -2.7279999999999998
                },
                {
                  "x": -2.864,
                  "y": -5.323999999999999
                },
                {
                  "x": -2.415999999999999,
                  "y": -7.655999999999999
                },
                {
                  "x": -2.112,
                  "y": -9.592
                },
                {
                  "x": -2.0,
                  "y": -11.0
                }
              ]
            },
            {
              "startLaneIndex": 1,
              "endLaneIndex": 1,
              "points": [
                {
                  "x": -6.0,
                  "y": 11.0
                },
                {
                  "x": -6.0,
                  "y": 9.592
                },
                {
                  "x": -6.0,
                  "y": 7.656
                },
                {
                  "x": -6.0,
                  "y": 5.324
                },
                {
                  "x": -6.0,
                  "y": 2.7279999999999998
                },
                {
                  "x": -6.0,
                  "y": 0.0
                },
                {
                  "x": -6.0,
                  "y": -2.7279999999999998
                },
                {
                  "x": -6.0,
                  "y": -5.323999999999999
                },
                {
                  "x": -5.999999999999999,
                  "y": -7.655999999999999
                },
                {
                  "x": -6.0,
                  "y": -9.592
                },
                {
                  "x": -6.0,
                  "y": -11.0
                }
              ]
            },
            {
              "startLaneIndex": 1,
              "endLaneIndex": 2,
              "points": [
                {
                  "x": -6.0,
                  "y": 11.0
                },
                {
                  "x": -6.112,
                  "y": 9.592
                },
                {
                  "x": -6.416,
                  "y": 7.656
                },
                {
                  "x": -6.864,
                  "y": 5.324
                },
                {
                  "x": -7.408,
                  "y": 2.7279999999999998
                },
                {
                  "x": -8.0,
                  "y": 0.0
                },
                {
                  "x": -8.592,
                  "y": -2.7279999999999998
                },
                {
                  "x": -9.136,
                  "y": -5.323999999999999
                },
                {
                  "x": -9.584,
                  "y": -7.655999999999999
                },
                {
                  "x": -9.888,
                  "y": -9.592
                },
                {
                  "x": -10.0,
                  "y": -11.0
                }
              ]
            }
          ]
        }
      ],
      "trafficLight": {
        "roadLinkIndices": [
          0,
          1,
          2,
          3,
          4,
          5,
          6,
          7,
          8,
          9,
          10,
          11
        ],
        "lightphases": [
          {
            "time": 5,
            "availableRoadLinks": [
              10,
              2,
              3,
              6
            ]
          },
          {
            "time": 30,
            "availableRoadLinks": [
              0,
              2,
              3,
              6,
              7,
              10
            ]
          },
          {
            "time": 30,
            "availableRoadLinks": [
              2,
              3,
              4,
              6,
              10,
              11
            ]
          },
          {
            "time": 30,
            "availableRoadLinks": [
              1,
              2,
              3,
              6,
              8,
              10
            ]
          },
          {
            "time": 30,
            "availableRoadLinks": [
              2,
              3,
              5,
              6,
              9,
              10
            ]
          },
          {
            "time": 30,
            "availableRoadLinks": [
              0,
              1,
              2,
              3,
              6,
              10
            ]
          },
          {
            "time": 30,
            "availableRoadLinks": [
              2,
              3,
              6,
              7,
              8,
              10
            ]
          },
          {
            "time": 30,
            "availableRoadLinks": [
              2,
              3,
              4,
              5,
              6,
              10
            ]
          },
          {
            "time": 30,
            "availableRoadLinks": [
              2,
              3,
              6,
              9,
              10,
              11
            ]
          }
        ]
      },
      "virtual": false
    },
    {
      "id": "intersection_1_2",
      "point": {
        "x": 0,
        "y": 300
      },
      "width": 11,
      "roads": [
        "road_0_2_0",
        "road_1_1_1",
        "road_2_2_2",
        "road_1_3_3",
        "road_1_2_0",
        "road_1_2_1",
        "road_1_2_2",
        "road_1_2_3"
      ],
      "roadLinks": [
        {
          "type": "go_straight",
          "startRoad": "road_0_2_0",
          "endRoad": "road_1_2_0",
          "direction": 0,
          "laneLinks": [
            {
              "startLaneIndex": 1,
              "endLaneIndex": 0,
              "points": [
                {
                  "x": -11.0,
                  "y": 294.0
                },
                {
                  "x": -9.592,
                  "y": 294.112
                },
                {
                  "x": -7.656,
                  "y": 294.416
                },
                {
                  "x": -5.324,
                  "y": 294.864
                },
                {
                  "x": -2.7279999999999998,
                  "y": 295.408
                },
                {
                  "x": 0.0,
                  "y": 296.0
                },
                {
                  "x": 2.7279999999999998,
                  "y": 296.592
                },
                {
                  "x": 5.323999999999999,
                  "y": 297.136
                },
                {
                  "x": 7.655999999999999,
                  "y": 297.584
                },
                {
                  "x": 9.592,
                  "y": 297.888
                },
                {
                  "x": 11.0,
                  "y": 298.0
                }
              ]
            },
            {
              "startLaneIndex": 1,
              "endLaneIndex": 1,
              "points": [
                {
                  "x": -11.0,
                  "y": 294.0
                },
                {
                  "x": -9.592,
                  "y": 294.0
                },
                {
                  "x": -7.656,
                  "y": 294.0
                },
                {
                  "x": -5.324,
                  "y": 294.0
                },
                {
                  "x": -2.7279999999999998,
                  "y": 294.0
                },
                {
                  "x": 0.0,
                  "y": 294.0
                },
                {
                  "x": 2.7279999999999998,
                  "y": 294.0
                },
                {
                  "x": 5.323999999999999,
                  "y": 294.0
                },
                {
                  "x": 7.655999999999999,
                  "y": 294.0
                },
                {
                  "x": 9.592,
                  "y": 294.0
                },
                {
                  "x": 11.0,
                  "y": 294.0
                }
              ]
            },
            {
              "startLaneIndex": 1,
              "endLaneIndex": 2,
              "points": [
                {
                  "x": -11.0,
                  "y": 294.0
                },
                {
                  "x": -9.592,
                  "y": 293.888
                },
                {
                  "x": -7.656,
                  "y": 293.584
                },
                {
                  "x": -5.324,
                  "y": 293.136
                },
                {
                  "x": -2.7279999999999998,
                  "y": 292.592
                },
                {
                  "x": 0.0,
                  "y": 292.0
                },
                {
                  "x": 2.7279999999999998,
                  "y": 291.408
                },
                {
                  "x": 5.323999999999999,
                  "y": 290.864
                },
                {
                  "x": 7.655999999999999,
                  "y": 290.416
                },
                {
                  "x": 9.592,
                  "y": 290.112
                },
                {
                  "x": 11.0,
                  "y": 290.0
                }
              ]
            }
          ]
        },
        {
          "type": "turn_left",
          "startRoad": "road_0_2_0",
          "endRoad": "road_1_2_1",
          "direction": 0,
          "laneLinks": [
            {
              "startLaneIndex": 0,
              "endLaneIndex": 0,
              "points": [
                {
                  "x": -11.0,
                  "y": 298.0
                },
                {
                  "x": -9.745,
                  "y": 298.265
                },
                {
                  "x": -8.24,
                  "y": 299.0
                },
                {
                  "x": -6.575,
                  "y": 300.115
                },
                {
                  "x": -4.84,
                  "y": 301.52
                },
                {
                  "x": -3.125,
                  "y": 303.125
                },
                {
                  "x": -1.52,
                  "y": 304.84
                },
                {
                  "x": -0.115000000000001,
                  "y": 306.575
                },
                {
                  "x": 0.999999999999999,
                  "y": 308.24
                },
                {
                  "x": 1.735,
                  "y": 309.745
                },
                {
                  "x": 2.0,
                  "y": 311.0
                }
              ]
            },
            {
              "startLaneIndex": 0,
              "endLaneIndex": 1,
              "points": [
                {
                  "x": -11.0,
                  "y": 298.0
                },
                {
                  "x": -9.633,
                  "y": 298.265
                },
                {
                  "x": -7.824,
                  "y": 299.0
                },
                {
                  "x": -5.711,
                  "y": 300.115
                },
                {
                  "x": -3.432,
                  "y": 301.52
                },
                {
                  "x": -1.125,
                  "y": 303.125
                },
                {
                  "x": 1.072,
                  "y": 304.84
                },
                {
                  "x": 3.020999999999999,
                  "y": 306.575
                },
                {
                  "x": 4.583999999999999,
                  "y": 308.24
                },
                {
                  "x": 5.623,
                  "y": 309.745
                },
                {
                  "x": 6.0,
                  "y": 311.0
                }
              ]
            },
            {
              "startLaneIndex": 0,
              "endLaneIndex": 2,
              "points": [
                {
                  "x": -11.0,
                  "y": 298.0
                },
                {
                  "x": -9.521,
                  "y": 298.265
                },
                {
                  "x": -7.408,
                  "y": 299.0
                },
                {
                  "x": -4.8469999999999995,
                  "y": 300.115
                },
                {
                  "x": -2.024,
                  "y": 301.52
                },
                {
                  "x": 0.875,
                  "y": 303.125
                },
                {
                  "x": 3.664,
                  "y": 304.84
                },
                {
                  "x": 6.156999999999999,
                  "y": 306.575
                },
                {
                  "x": 8.168,
                  "y": 308.24
                },
                {
                  "x": 9.511,
                  "y": 309.745
                },
                {
                  "x": 10.0,
                  "y": 311.0
                }
              ]
            }
          ]
        },
        {
          "type": "turn_right",
          "startRoad": "road_0_2_0",
          "endRoad": "road_1_2_3",
          "direction": 0,
          "laneLinks": [
            {
              "startLaneIndex": 2,
              "endLaneIndex": 0,
              "points": [
                {
                  "x": -11.0,
                  "y": 290.0
                },
                {
                  "x": -9.857,
                  "y": 290.071
                },
                {
                  "x": -8.656,
                  "y": 290.248
                },
                {
                  "x": -7.439,
                  "y": 290.477
                },
                {
                  "x": -6.248,
                  "y": 290.704
                },
                {
                  "x": -5.125,
                  "y": 290.875
                },
                {
                  "x": -4.112,
                  "y": 290.936
                },
                {
                  "x": -3.251000000000001,
                  "y": 290.83299999999997
                },
                {
                  "x": -2.584000000000001,
                  "y": 290.512
                },
                {
                  "x": -2.153,
                  "y": 289.919
                },
                {
                  "x": -2.0,
                  "y": 289.0
                }
              ]
            },
            {
              "startLaneIndex": 2,
              "endLaneIndex": 1,
              "points": [
                {
                  "x": -11.0,
                  "y": 290.0
                },
                {
                  "x": -9.969,
                  "y": 290.071
                },
                {
                  "x": -9.072,
                  "y": 290.248
                },
                {
                  "x": -8.303,
                  "y": 290.477
                },
                {
                  "x": -7.656,
                  "y": 290.704
                },
                {
                  "x": -7.125,
                  "y": 290.875
                },
                {
                  "x": -6.704,
                  "y": 290.936
                },
                {
                  "x": -6.387000000000001,
                  "y": 290.83299999999997
                },
                {
                  "x": -6.168000000000001,
                  "y": 290.512
                },
                {
                  "x": -6.0409999999999995,
                  "y": 289.919
                },
                {
                  "x": -6.0,
                  "y": 289.0
                }
              ]
            },
            {
              "startLaneIndex": 2,
              "endLaneIndex": 2,
              "points": [
                {
                  "x": -11.0,
                  "y": 290.0
                },
                {
                  "x": -10.081,
                  "y": 290.071
                },
                {
                  "x": -9.488,
                  "y": 290.248
                },
                {
                  "x": -9.167,
                  "y": 290.477
                },
                {
                  "x": -9.064,
                  "y": 290.704
                },
                {
                  "x": -9.125,
                  "y": 290.875
                },
                {
                  "x": -9.296,
                  "y": 290.936
                },
                {
                  "x": -9.523000000000001,
                  "y": 290.83299999999997
                },
                {
                  "x": -9.752,
                  "y": 290.512
                },
                {
                  "x": -9.929,
                  "y": 289.919
                },
                {
                  "x": -10.0,
                  "y": 289.0
                }
              ]
            }
          ]
        },
        {
          "type": "turn_right",
          "startRoad": "road_1_1_1",
          "endRoad": "road_1_2_0",
          "direction": 1,
          "laneLinks": [
            {
              "startLaneIndex": 2,
              "endLaneIndex": 0,
              "points": [
                {
                  "x": 10.0,
                  "y": 289.0
                },
                {
                  "x": 9.929,
                  "y": 290.143
                },
                {
                  "x": 9.752,
                  "y": 291.344
                },
                {
                  "x": 9.523,
                  "y": 292.561
                },
                {
                  "x": 9.296,
                  "y": 293.752
                },
                {
                  "x": 9.125,
                  "y": 294.875
                },
                {
                  "x": 9.064,
                  "y": 295.888
                },
                {
                  "x": 9.167,
                  "y": 296.749
                },
                {
                  "x": 9.488,
                  "y": 297.416
                },
                {
                  "x": 10.081,
                  "y": 297.847
                },
                {
                  "x": 11.0,
                  "y": 298.0
                }
              ]
            },
            {
              "startLaneIndex": 2,
              "endLaneIndex": 1,
              "points": [
                {
                  "x": 10.0,
                  "y": 289.0
                },
                {
                  "x": 9.929,
                  "y": 290.031
                },
                {
                  "x": 9.752,
                  "y": 290.928
                },
                {
                  "x": 9.523,
                  "y": 291.697
                },
                {
                  "x": 9.296,
                  "y": 292.344
                },
                {
                  "x": 9.125,
                  "y": 292.875
                },
                {
                  "x": 9.064,
                  "y": 293.296
                },
                {
                  "x": 9.167,
                  "y": 293.613
                },
                {
                  "x": 9.488,
                  "y": 293.832
                },
                {
                  "x": 10.081,
                  "y": 293.959
                },
                {
                  "x": 11.0,
                  "y": 294.0
                }
              ]
            },
            {
              "startLaneIndex": 2,
              "endLaneIndex": 2,
              "points": [
                {
                  "x": 10.0,
                  "y": 289.0
                },
                {
                  "x": 9.929,
                  "y": 289.919
                },
                {
                  "x": 9.752,
                  "y": 290.512
                },
                {
                  "x": 9.523,
                  "y": 290.83299999999997
                },
                {
                  "x": 9.296,
                  "y": 290.936
                },
                {
                  "x": 9.125,
                  "y": 290.875
                },
                {
                  "x": 9.064,
                  "y": 290.704
                },
                {
                  "x": 9.167,
                  "y": 290.477
                },
                {
                  "x": 9.488,
                  "y": 290.248
                },
                {
                  "x": 10.081,
                  "y": 290.071
                },
                {
                  "x": 11.0,
                  "y": 290.0
                }
              ]
            }
          ]
        },
        {
          "type": "go_straight",
          "startRoad": "road_1_1_1",
          "endRoad": "road_1_2_1",
          "direction": 1,
          "laneLinks": [
            {
              "startLaneIndex": 1,
              "endLaneIndex": 0,
              "points": [
                {
                  "x": 6.0,
                  "y": 289.0
                },
                {
                  "x": 5.888,
                  "y": 290.408
                },
                {
                  "x": 5.584,
                  "y": 292.344
                },
                {
                  "x": 5.136,
                  "y": 294.676
                },
                {
                  "x": 4.592,
                  "y": 297.272
                },
                {
                  "x": 4.0,
                  "y": 300.0
                },
                {
                  "x": 3.408,
                  "y": 302.728
                },
                {
                  "x": 2.864,
                  "y": 305.324
                },
                {
                  "x": 2.415999999999999,
                  "y": 307.656
                },
                {
                  "x": 2.112,
                  "y": 309.592
                },
                {
                  "x": 2.0,
                  "y": 311.0
                }
              ]
            },
            {
              "startLaneIndex": 1,
              "endLaneIndex": 1,
              "points": [
                {
                  "x": 6.0,
                  "y": 289.0
                },
                {
                  "x": 6.0,
                  "y": 290.408
                },
                {
                  "x": 6.0,
                  "y": 292.344
                },
                {
                  "x": 6.0,
                  "y": 294.676
                },
                {
                  "x": 6.0,
                  "y": 297.272
                },
                {
                  "x": 6.0,
                  "y": 300.0
                },
                {
                  "x": 6.0,
                  "y": 302.728
                },
                {
                  "x": 6.0,
                  "y": 305.324
                },
                {
                  "x": 5.999999999999999,
                  "y": 307.656
                },
                {
                  "x": 6.0,
                  "y": 309.592
                },
                {
                  "x": 6.0,
                  "y": 311.0
                }
              ]
            },
            {
              "startLaneIndex": 1,
              "endLaneIndex": 2,
              "points": [
                {
                  "x": 6.0,
                  "y": 289.0
                },
                {
                  "x": 6.112,
                  "y": 290.408
                },
                {
                  "x": 6.416,
                  "y": 292.344
                },
                {
                  "x": 6.864,
                  "y": 294.676
                },
                {
                  "x": 7.408,
                  "y": 297.272
                },
                {
                  "x": 8.0,
                  "y": 300.0
                },
                {
                  "x": 8.592,
                  "y": 302.728
                },
                {
                  "x": 9.136,
                  "y": 305.324
                },
                {
                  "x": 9.584,
                  "y": 307.656
                },
                {
                  "x": 9.888,
                  "y": 309.592
                },
                {
                  "x": 10.0,
                  "y": 311.0
                }
              ]
            }
          ]
        },
        {
          "type": "turn_left",
          "startRoad": "road_1_1_1",
          "endRoad": "road_1_2_2",
          "direction": 1,
          "laneLinks": [
            {
              "startLaneIndex": 0,
              "endLaneIndex": 0,
              "points": [
                {
                  "x": 2.0,
                  "y": 289.0
                },
                {
                  "x": 1.7349999999999999,
                  "y": 290.255
                },
                {
                  "x": 1.0,
                  "y": 291.76
                },
                {
                  "x": -0.115,
                  "y": 293.425
                },
                {
                  "x": -1.52,
                  "y": 295.15999999999997
                },
                {
                  "x": -3.125,
                  "y": 296.875
                },
                {
                  "x": -4.84,
                  "y": 298.48
                },
                {
                  "x": -6.575,
                  "y": 299.885
                },
                {
                  "x": -8.24,
                  "y": 301.0
                },
                {
                  "x": -9.745,
                  "y": 301.735
                },
                {
                  "x": -11.0,
                  "y": 302.0
                }
              ]
            },
            {
              "startLaneIndex": 0,
              "endLaneIndex": 1,
              "points": [
                {
                  "x": 2.0,
                  "y": 289.0
                },
                {
                  "x": 1.7349999999999999,
                  "y": 290.367
                },
                {
                  "x": 1.0,
                  "y": 292.176
                },
                {
                  "x": -0.115,
                  "y": 294.289
                },
                {
                  "x": -1.52,
                  "y": 296.568
                },
                {
                  "x": -3.125,
                  "y": 298.875
                },
                {
                  "x": -4.84,
                  "y": 301.072
                },
                {
                  "x": -6.575,
                  "y": 303.021
                },
                {
                  "x": -8.24,
                  "y": 304.584
                },
                {
                  "x": -9.745,
                  "y": 305.623
                },
                {
                  "x": -11.0,
                  "y": 306.0
                }
              ]
            },
            {
              "startLaneIndex": 0,
              "endLaneIndex": 2,
              "points": [
                {
                  "x": 2.0,
                  "y": 289.0
                },
                {
                  "x": 1.7349999999999999,
                  "y": 290.479
                },
                {
                  "x": 1.0,
                  "y": 292.592
                },
                {
                  "x": -0.115,
                  "y": 295.153
                },
                {
                  "x": -1.52,
                  "y": 297.976
                },
                {
                  "x": -3.125,
                  "y": 300.875
                },
                {
                  "x": -4.84,
                  "y": 303.664
                },
                {
                  "x": -6.575,
                  "y": 306.157
                },
                {
                  "x": -8.24,
                  "y": 308.168
                },
                {
                  "x": -9.745,
                  "y": 309.511
                },
                {
                  "x": -11.0,
                  "y": 310.0
                }
              ]
            }
          ]
        },
        {
          "type": "turn_right",
          "startRoad": "road_2_2_2",
          "endRoad": "road_1_2_1",
          "direction": 2,
          "laneLinks": [
            {
              "startLaneIndex": 2,
              "endLaneIndex": 0,
              "points": [
                {
                  "x": 11.0,
                  "y": 310.0
                },
                {
                  "x": 9.857,
                  "y": 309.929
                },
                {
                  "x": 8.656,
                  "y": 309.752
                },
                {
                  "x": 7.439,
                  "y": 309.523
                },
                {
                  "x": 6.248,
                  "y": 309.296
                },
                {
                  "x": 5.125,
                  "y": 309.125
                },
                {
                  "x": 4.112,
                  "y": 309.064
                },
                {
                  "x": 3.251000000000001,
                  "y": 309.167
                },
                {
                  "x": 2.584000000000001,
                  "y": 309.488
                },
                {
                  "x": 2.153,
                  "y": 310.081
                },
                {
                  "x": 2.0,
                  "y": 311.0
                }
              ]
            },
            {
              "startLaneIndex": 2,
              "endLaneIndex": 1,
              "points": [
                {
                  "x": 11.0,
                  "y": 310.0
                },
                {
                  "x": 9.969,
                  "y": 309.929
                },
                {
                  "x": 9.072,
                  "y": 309.752
                },
                {
                  "x": 8.303,
                  "y": 309.523
                },
                {
                  "x": 7.656,
                  "y": 309.296
                },
                {
                  "x": 7.125,
                  "y": 309.125
                },
                {
                  "x": 6.704,
                  "y": 309.064
                },
                {
                  "x": 6.387000000000001,
                  "y": 309.167
                },
                {
                  "x": 6.168000000000001,
                  "y": 309.488
                },
                {
                  "x": 6.0409999999999995,
                  "y": 310.081
                },
                {
                  "x": 6.0,
                  "y": 311.0
                }
              ]
            },
            {
              "startLaneIndex": 2,
              "endLaneIndex": 2,
              "points": [
                {
                  "x": 11.0,
                  "y": 310.0
                },
                {
                  "x": 10.081,
                  "y": 309.929
                },
                {
                  "x": 9.488,
                  "y": 309.752
                },
                {
                  "x": 9.167,
                  "y": 309.523
                },
                {
                  "x": 9.064,
                  "y": 309.296
                },
                {
                  "x": 9.125,
                  "y": 309.125
                },
                {
                  "x": 9.296,
                  "y": 309.064
                },
                {
                  "x": 9.523000000000001,
                  "y": 309.167
                },
                {
                  "x": 9.752,
                  "y": 309.488
                },
                {
                  "x": 9.929,
                  "y": 310.081
                },
                {
                  "x": 10.0,
                  "y": 311.0
                }
              ]
            }
          ]
        },
        {
          "type": "go_straight",
          "startRoad": "road_2_2_2",
          "endRoad": "road_1_2_2",
          "direction": 2,
          "laneLinks": [
            {
              "startLaneIndex": 1,
              "endLaneIndex": 0,
              "points": [
                {
                  "x": 11.0,
                  "y": 306.0
                },
                {
                  "x": 9.592,
                  "y": 305.888
                },
                {
                  "x": 7.656,
                  "y": 305.584
                },
                {
                  "x": 5.324,
                  "y": 305.136
                },
                {
                  "x": 2.7279999999999998,
                  "y": 304.592
                },
                {
                  "x": 0.0,
                  "y": 304.0
                },
                {
                  "x": -2.7279999999999998,
                  "y": 303.408
                },
                {
                  "x": -5.323999999999999,
                  "y": 302.864
                },
                {
                  "x": -7.655999999999999,
                  "y": 302.416
                },
                {
                  "x": -9.592,
                  "y": 302.112
                },
                {
                  "x": -11.0,
                  "y": 302.0
                }
              ]
            },
            {
              "startLaneIndex": 1,
              "endLaneIndex": 1,
              "points": [
                {
                  "x": 11.0,
                  "y": 306.0
                },
                {
                  "x": 9.592,
                  "y": 306.0
                },
                {
                  "x": 7.656,
                  "y": 306.0
                },
                {
                  "x": 5.324,
                  "y": 306.0
                },
                {
                  "x": 2.7279999999999998,
                  "y": 306.0
                },
                {
                  "x": 0.0,
                  "y": 306.0
                },
                {
                  "x": -2.7279999999999998,
                  "y": 306.0
                },
                {
                  "x": -5.323999999999999,
                  "y": 306.0
                },
                {
                  "x": -7.655999999999999,
                  "y": 306.0
                },
                {
                  "x": -9.592,
                  "y": 306.0
                },
                {
                  "x": -11.0,
                  "y": 306.0
                }
              ]
            },
            {
              "startLaneIndex": 1,
              "endLaneIndex": 2,
              "points": [
                {
                  "x": 11.0,
                  "y": 306.0
                },
                {
                  "x": 9.592,
                  "y": 306.112
                },
                {
                  "x": 7.656,
                  "y": 306.416
                },
                {
                  "x": 5.324,
                  "y": 306.864
                },
                {
                  "x": 2.7279999999999998,
                  "y": 307.408
                },
                {
                  "x": 0.0,
                  "y": 308.0
                },
                {
                  "x": -2.7279999999999998,
                  "y": 308.592
                },
                {
                  "x": -5.323999999999999,
                  "y": 309.136
                },
                {
                  "x": -7.655999999999999,
                  "y": 309.584
                },
                {
                  "x": -9.592,
                  "y": 309.88800000000003
                },
                {
                  "x": -11.0,
                  "y": 310.0
                }
              ]
            }
          ]
        },
        {
          "type": "turn_left",
          "startRoad": "road_2_2_2",
          "endRoad": "road_1_2_3",
          "direction": 2,
          "laneLinks": [
            {
              "startLaneIndex": 0,
              "endLaneIndex": 0,
              "points": [
                {
                  "x": 11.0,
                  "y": 302.0
                },
                {
                  "x": 9.745,
                  "y": 301.735
                },
                {
                  "x": 8.24,
                  "y": 301.0
                },
                {
                  "x": 6.575,
                  "y": 299.885
                },
                {
                  "x": 4.84,
                  "y": 298.48
                },
                {
                  "x": 3.125,
                  "y": 296.875
                },
                {
                  "x": 1.52,
                  "y": 295.15999999999997
                },
                {
                  "x": 0.115000000000001,
                  "y": 293.425
                },
                {
                  "x": -0.999999999999999,
                  "y": 291.76
                },
                {
                  "x": -1.735,
                  "y": 290.255
                },
                {
                  "x": -2.0,
                  "y": 289.0
                }
              ]
            },
            {
              "startLaneIndex": 0,
              "endLaneIndex": 1,
              "points": [
                {
                  "x": 11.0,
                  "y": 302.0
                },
                {
                  "x": 9.633,
                  "y": 301.735
                },
                {
                  "x": 7.824,
                  "y": 301.0
                },
                {
                  "x": 5.711,
                  "y": 299.885
                },
                {
                  "x": 3.432,
                  "y": 298.48
                },
                {
                  "x": 1.125,
                  "y": 296.875
                },
                {
                  "x": -1.072,
                  "y": 295.15999999999997
                },
                {
                  "x": -3.020999999999999,
                  "y": 293.425
                },
                {
                  "x": -4.583999999999999,
                  "y": 291.76
                },
                {
                  "x": -5.623,
                  "y": 290.255
                },
                {
                  "x": -6.0,
                  "y": 289.0
                }
              ]
            },
            {
              "startLaneIndex": 0,
              "endLaneIndex": 2,
              "points": [
                {
                  "x": 11.0,
                  "y": 302.0
                },
                {
                  "x": 9.521,
                  "y": 301.735
                },
                {
                  "x": 7.408,
                  "y": 301.0
                },
                {
                  "x": 4.8469999999999995,
                  "y": 299.885
                },
                {
                  "x": 2.024,
                  "y": 298.48
                },
                {
                  "x": -0.875,
                  "y": 296.875
                },
                {
                  "x": -3.664,
                  "y": 295.15999999999997
                },
                {
                  "x": -6.156999999999999,
                  "y": 293.425
                },
                {
                  "x": -8.168,
                  "y": 291.76
                },
                {
                  "x": -9.511,
                  "y": 290.255
                },
                {
                  "x": -10.0,
                  "y": 289.0
                }
              ]
            }
          ]
        },
        {
          "type": "turn_left",
          "startRoad": "road_1_3_3",
          "endRoad": "road_1_2_0",
          "direction": 3,
          "laneLinks": [
            {
              "startLaneIndex": 0,
              "endLaneIndex": 0,
              "points": [
                {
                  "x": -2.0,
                  "y": 311.0
                },
                {
                  "x": -1.7349999999999999,
                  "y": 309.745
                },
                {
                  "x": -1.0,
                  "y": 308.24
                },
                {
                  "x": 0.115,
                  "y": 306.575
                },
                {
                  "x": 1.52,
                  "y": 304.84
                },
                {
                  "x": 3.125,
                  "y": 303.125
                },
                {
                  "x": 4.84,
                  "y": 301.52
                },
                {
                  "x": 6.575,
                  "y": 300.115
                },
                {
                  "x": 8.24,
                  "y": 299.0
                },
                {
                  "x": 9.745,
                  "y": 298.265
                },
                {
                  "x": 11.0,
                  "y": 298.0
                }
              ]
            },
            {
              "startLaneIndex": 0,
              "endLaneIndex": 1,
              "points": [
                {
                  "x": -2.0,
                  "y": 311.0
                },
                {
                  "x": -1.7349999999999999,
                  "y": 309.633
                },
                {
                  "x": -1.0,
                  "y": 307.824
                },
                {
                  "x": 0.115,
                  "y": 305.711
                },
                {
                  "x": 1.52,
                  "y": 303.432
                },
                {
                  "x": 3.125,
                  "y": 301.125
                },
                {
                  "x": 4.84,
                  "y": 298.928
                },
                {
                  "x": 6.575,
                  "y": 296.979
                },
                {
                  "x": 8.24,
                  "y": 295.416
                },
                {
                  "x": 9.745,
                  "y": 294.377
                },
                {
                  "x": 11.0,
                  "y": 294.0
                }
              ]
            },
            {
              "startLaneIndex": 0,
              "endLaneIndex": 2,
              "points": [
                {
                  "x": -2.0,
                  "y": 311.0
                },
                {
                  "x": -1.7349999999999999,
                  "y": 309.521
                },
                {
                  "x": -1.0,
                  "y": 307.408
                },
                {
                  "x": 0.115,
                  "y": 304.847
                },
                {
                  "x": 1.52,
                  "y": 302.024
                },
                {
                  "x": 3.125,
                  "y": 299.125
                },
                {
                  "x": 4.84,
                  "y": 296.336
                },
                {
                  "x": 6.575,
                  "y": 293.843
                },
                {
                  "x": 8.24,
                  "y": 291.832
                },
                {
                  "x": 9.745,
                  "y": 290.48900000000003
                },
                {
                  "x": 11.0,
                  "y": 290.0
                }
              ]
            }
          ]
        },
        {
          "type": "turn_right",
          "startRoad": "road_1_3_3",
          "endRoad": "road_1_2_2",
          "direction": 3,
          "laneLinks": [
            {
              "startLaneIndex": 2,
              "endLaneIndex": 0,
              "points": [
                {
                  "x": -10.0,
                  "y": 311.0
                },
                {
                  "x": -9.929,
                  "y": 309.85699999999997
                },
                {
                  "x": -9.752,
                  "y": 308.656
                },
                {
                  "x": -9.523,
                  "y": 307.439
                },
                {
                  "x": -9.296,
                  "y": 306.248
                },
                {
                  "x": -9.125,
                  "y": 305.125
                },
                {
                  "x": -9.064,
                  "y": 304.112
                },
                {
                  "x": -9.167,
                  "y": 303.251
                },
                {
                  "x": -9.488,
                  "y": 302.584
                },
                {
                  "x": -10.081,
                  "y": 302.153
                },
                {
                  "x": -11.0,
                  "y": 302.0
                }
              ]
            },
            {
              "startLaneIndex": 2,
              "endLaneIndex": 1,
              "points": [
                {
                  "x": -10.0,
                  "y": 311.0
                },
                {
                  "x": -9.929,
                  "y": 309.969
                },
                {
                  "x": -9.752,
                  "y": 309.072
                },
                {
                  "x": -9.523,
                  "y": 308.303
                },
                {
                  "x": -9.296,
                  "y": 307.656
                },
                {
                  "x": -9.125,
                  "y": 307.125
                },
                {
                  "x": -9.064,
                  "y": 306.704
                },
                {
                  "x": -9.167,
                  "y": 306.387
                },
                {
                  "x": -9.488,
                  "y": 306.168
                },
                {
                  "x": -10.081,
                  "y": 306.041
                },
                {
                  "x": -11.0,
                  "y": 306.0
                }
              ]
            },
            {
              "startLaneIndex": 2,
              "endLaneIndex": 2,
              "points": [
                {
                  "x": -10.0,
                  "y": 311.0
                },
                {
                  "x": -9.929,
                  "y": 310.081
                },
                {
                  "x": -9.752,
                  "y": 309.488
                },
                {
                  "x": -9.523,
                  "y": 309.167
                },
                {
                  "x": -9.296,
                  "y": 309.064
                },
                {
                  "x": -9.125,
                  "y": 309.125
                },
                {
                  "x": -9.064,
                  "y": 309.296
                },
                {
                  "x": -9.167,
                  "y": 309.523
                },
                {
                  "x": -9.488,
                  "y": 309.752
                },
                {
                  "x": -10.081,
                  "y": 309.92900000000003
                },
                {
                  "x": -11.0,
                  "y": 310.0
                }
              ]
            }
          ]
        },
        {
          "type": "go_straight",
          "startRoad": "road_1_3_3",
          "endRoad": "road_1_2_3",
          "direction": 3,
          "laneLinks": [
            {
              "startLaneIndex": 1,
              "endLaneIndex": 0,
              "points": [
                {
                  "x": -6.0,
                  "y": 311.0
                },
                {
                  "x": -5.888,
                  "y": 309.592
                },
                {
                  "x": -5.584,
                  "y": 307.656
                },
                {
                  "x": -5.136,
                  "y": 305.324
                },
                {
                  "x": -4.592,
                  "y": 302.728
                },
                {
                  "x": -4.0,
                  "y": 300.0
                },
                {
                  "x": -3.408,
                  "y": 297.272
                },
                {
                  "x": -2.864,
                  "y": 294.676
                },
                {
                  "x": -2.415999999999999,
                  "y": 292.344
                },
                {
                  "x": -2.112,
                  "y": 290.408
                },
                {
                  "x": -2.0,
                  "y": 289.0
                }
              ]
            },
            {
              "startLaneIndex": 1,
              "endLaneIndex": 1,
              "points": [
                {
                  "x": -6.0,
                  "y": 311.0
                },
                {
                  "x": -6.0,
                  "y": 309.592
                },
                {
                  "x": -6.0,
                  "y": 307.656
                },
                {
                  "x": -6.0,
                  "y": 305.324
                },
                {
                  "x": -6.0,
                  "y": 302.728
                },
                {
                  "x": -6.0,
                  "y": 300.0
                },
                {
                  "x": -6.0,
                  "y": 297.272
                },
                {
                  "x": -6.0,
                  "y": 294.676
                },
                {
                  "x": -5.999999999999999,
                  "y": 292.344
                },
                {
                  "x": -6.0,
                  "y": 290.408
                },
                {
                  "x": -6.0,
                  "y": 289.0
                }
              ]
            },
            {
              "startLaneIndex": 1,
              "endLaneIndex": 2,
              "points": [
                {
                  "x": -6.0,
                  "y": 311.0
                },
                {
                  "x": -6.112,
                  "y": 309.592
                },
                {
                  "x": -6.416,
                  "y": 307.656
                },
                {
                  "x": -6.864,
                  "y": 305.324
                },
                {
                  "x": -7.408,
                  "y": 302.728
                },
                {
                  "x": -8.0,
                  "y": 300.0
                },
                {
                  "x": -8.592,
                  "y": 297.272
                },
                {
                  "x": -9.136,
                  "y": 294.676
                },
                {
                  "x": -9.584,
                  "y": 292.344
                },
                {
                  "x": -9.888,
                  "y": 290.408
                },
                {
                  "x": -10.0,
                  "y": 289.0
                }
              ]
            }
          ]
        }
      ],
      "trafficLight": {
        "roadLinkIndices": [
          0,
          1,
          2,
          3,
          4,
          5,
          6,
          7,
          8,
          9,
          10,
          11
        ],
        "lightphases": [
          {
            "time": 5,
            "availableRoadLinks": [
              10,
              2,
              3,
              6
            ]
          },
          {
            "time": 30,
            "availableRoadLinks": [
              0,
              2,
              3,
              6,
              7,
              10
            ]
          },
          {
            "time": 30,
            "availableRoadLinks": [
              2,
              3,
              4,
              6,
              10,
              11
            ]
          },
          {
            "time": 30,
            "availableRoadLinks": [
              1,
              2,
              3,
              6,
              8,
              10
            ]
          },
          {
            "time": 30,
            "availableRoadLinks": [
              2,
              3,
              5,
              6,
              9,
              10
            ]
          },
          {
            "time": 30,
            "availableRoadLinks": [
              0,
              1,
              2,
              3,
              6,
              10
            ]
          },
          {
            "time": 30,
            "availableRoadLinks": [
              2,
              3,
              6,
              7,
              8,
              10
            ]
          },
          {
            "time": 30,
            "availableRoadLinks": [
              2,
              3,
              4,
              5,
              6,
              10
            ]
          },
          {
            "time": 30,
            "availableRoadLinks": [
              2,
              3,
              6,
              9,
              10,
              11
            ]
          }
        ]
      },
      "virtual": false
    },
    {
      "id": "intersection_1_3",
      "point": {
        "x": 0,
        "y": 600
      },
      "width": 11,
      "roads": [
        "road_0_3_0",
        "road_1_2_1",
        "road_2_3_2",
        "road_1_4_3",
        "road_1_3_0",
        "road_1_3_1",
        "road_1_3_2",
        "road_1_3_3"
      ],
      "roadLinks": [
        {
          "type": "go_straight",
          "startRoad": "road_0_3_0",
          "endRoad": "road_1_3_0",
          "direction": 0,
          "laneLinks": [
            {
              "startLaneIndex": 1,
              "endLaneIndex": 0,
              "points": [
                {
                  "x": -11.0,
                  "y": 594.0
                },
                {
                  "x": -9.592,
                  "y": 594.112
                },
                {
                  "x": -7.656,
                  "y": 594.4159999999999
                },
                {
                  "x": -5.324,
                  "y": 594.864
                },
                {
                  "x": -2.7279999999999998,
                  "y": 595.408
                },
                {
                  "x": 0.0,
                  "y": 596.0
                },
                {
                  "x": 2.7279999999999998,
                  "y": 596.592
                },
                {
                  "x": 5.323999999999999,
                  "y": 597.136
                },
                {
                  "x": 7.655999999999999,
                  "y": 597.584
                },
                {
                  "x": 9.592,
                  "y": 597.888
                },
                {
                  "x": 11.0,
                  "y": 598.0
                }
              ]
            },
            {
              "startLaneIndex": 1,
              "endLaneIndex": 1,
              "points": [
                {
                  "x": -11.0,
                  "y": 594.0
                },
                {
                  "x": -9.592,
                  "y": 594.0
                },
                {
                  "x": -7.656,
                  "y": 594.0
                },
                {
                  "x": -5.324,
                  "y": 594.0
                },
                {
                  "x": -2.7279999999999998,
                  "y": 594.0
                },
                {
                  "x": 0.0,
                  "y": 594.0
                },
                {
                  "x": 2.7279999999999998,
                  "y": 594.0
                },
                {
                  "x": 5.323999999999999,
                  "y": 594.0
                },
                {
                  "x": 7.655999999999999,
                  "y": 593.9999999999999
                },
                {
                  "x": 9.592,
                  "y": 594.0
                },
                {
                  "x": 11.0,
                  "y": 594.0
                }
              ]
            },
            {
              "startLaneIndex": 1,
              "endLaneIndex": 2,
              "points": [
                {
                  "x": -11.0,
                  "y": 594.0
                },
                {
                  "x": -9.592,
                  "y": 593.888
                },
                {
                  "x": -7.656,
                  "y": 593.584
                },
                {
                  "x": -5.324,
                  "y": 593.136
                },
                {
                  "x": -2.7279999999999998,
                  "y": 592.592
                },
                {
                  "x": 0.0,
                  "y": 592.0
                },
                {
                  "x": 2.7279999999999998,
                  "y": 591.408
                },
                {
                  "x": 5.323999999999999,
                  "y": 590.864
                },
                {
                  "x": 7.655999999999999,
                  "y": 590.4159999999999
                },
                {
                  "x": 9.592,
                  "y": 590.112
                },
                {
                  "x": 11.0,
                  "y": 590.0
                }
              ]
            }
          ]
        },
        {
          "type": "turn_left",
          "startRoad": "road_0_3_0",
          "endRoad": "road_1_3_1",
          "direction": 0,
          "laneLinks": [
            {
              "startLaneIndex": 0,
              "endLaneIndex": 0,
              "points": [
                {
                  "x": -11.0,
                  "y": 598.0
                },
                {
                  "x": -9.745,
                  "y": 598.265
                },
                {
                  "x": -8.24,
                  "y": 599.0
                },
                {
                  "x": -6.575,
                  "y": 600.115
                },
                {
                  "x": -4.84,
                  "y": 601.52
                },
                {
                  "x": -3.125,
                  "y": 603.125
                },
                {
                  "x": -1.52,
                  "y": 604.84
                },
                {
                  "x": -0.115000000000001,
                  "y": 606.575
                },
                {
                  "x": 0.999999999999999,
                  "y": 608.2399999999999
                },
                {
                  "x": 1.735,
                  "y": 609.745
                },
                {
                  "x": 2.0,
                  "y": 611.0
                }
              ]
            },
            {
              "startLaneIndex": 0,
              "endLaneIndex": 1,
              "points": [
                {
                  "x": -11.0,
                  "y": 598.0
                },
                {
                  "x": -9.633,
                  "y": 598.265
                },
                {
                  "x": -7.824,
                  "y": 599.0
                },
                {
                  "x": -5.711,
                  "y": 600.115
                },
                {
                  "x": -3.432,
                  "y": 601.52
                },
                {
                  "x": -1.125,
                  "y": 603.125
                },
                {
                  "x": 1.072,
                  "y": 604.84
                },
                {
                  "x": 3.020999999999999,
                  "y": 606.575
                },
                {
                  "x": 4.583999999999999,
                  "y": 608.2399999999999
                },
                {
                  "x": 5.623,
                  "y": 609.745
                },
                {
                  "x": 6.0,
                  "y": 611.0
                }
              ]
            },
            {
              "startLaneIndex": 0,
              "endLaneIndex": 2,
              "points": [
                {
                  "x": -11.0,
                  "y": 598.0
                },
                {
                  "x": -9.521,
                  "y": 598.265
                },
                {
                  "x": -7.408,
                  "y": 599.0
                },
                {
                  "x": -4.8469999999999995,
                  "y": 600.115
                },
                {
                  "x": -2.024,
                  "y": 601.52
                },
                {
                  "x": 0.875,
                  "y": 603.125
                },
                {
                  "x": 3.664,
                  "y": 604.84
                },
                {
                  "x": 6.156999999999999,
                  "y": 606.575
                },
                {
                  "x": 8.168,
                  "y": 608.2399999999999
                },
                {
                  "x": 9.511,
                  "y": 609.745
                },
                {
                  "x": 10.0,
                  "y": 611.0
                }
              ]
            }
          ]
        },
        {
          "type": "turn_right",
          "startRoad": "road_0_3_0",
          "endRoad": "road_1_3_3",
          "direction": 0,
          "laneLinks": [
            {
              "startLaneIndex": 2,
              "endLaneIndex": 0,
              "points": [
                {
                  "x": -11.0,
                  "y": 590.0
                },
                {
                  "x": -9.857,
                  "y": 590.071
                },
                {
                  "x": -8.656,
                  "y": 590.248
                },
                {
                  "x": -7.439,
                  "y": 590.477
                },
                {
                  "x": -6.248,
                  "y": 590.704
                },
                {
                  "x": -5.125,
                  "y": 590.875
                },
                {
                  "x": -4.112,
                  "y": 590.936
                },
                {
                  "x": -3.251000000000001,
                  "y": 590.833
                },
                {
                  "x": -2.584000000000001,
                  "y": 590.512
                },
                {
                  "x": -2.153,
                  "y": 589.919
                },
                {
                  "x": -2.0,
                  "y": 589.0
                }
              ]
            },
            {
              "startLaneIndex": 2,
              "endLaneIndex": 1,
              "points": [
                {
                  "x": -11.0,
                  "y": 590.0
                },
                {
                  "x": -9.969,
                  "y": 590.071
                },
                {
                  "x": -9.072,
                  "y": 590.248
                },
                {
                  "x": -8.303,
                  "y": 590.477
                },
                {
                  "x": -7.656,
                  "y": 590.704
                },
                {
                  "x": -7.125,
                  "y": 590.875
                },
                {
                  "x": -6.704,
                  "y": 590.936
                },
                {
                  "x": -6.387000000000001,
                  "y": 590.833
                },
                {
                  "x": -6.168000000000001,
                  "y": 590.512
                },
                {
                  "x": -6.0409999999999995,
                  "y": 589.919
                },
                {
                  "x": -6.0,
                  "y": 589.0
                }
              ]
            },
            {
              "startLaneIndex": 2,
              "endLaneIndex": 2,
              "points": [
                {
                  "x": -11.0,
                  "y": 590.0
                },
                {
                  "x": -10.081,
                  "y": 590.071
                },
                {
                  "x": -9.488,
                  "y": 590.248
                },
                {
                  "x": -9.167,
                  "y": 590.477
                },
                {
                  "x": -9.064,
                  "y": 590.704
                },
                {
                  "x": -9.125,
                  "y": 590.875
                },
                {
                  "x": -9.296,
                  "y": 590.936
                },
                {
                  "x": -9.523000000000001,
                  "y": 590.833
                },
                {
                  "x": -9.752,
                  "y": 590.512
                },
                {
                  "x": -9.929,
                  "y": 589.919
                },
                {
                  "x": -10.0,
                  "y": 589.0
                }
              ]
            }
          ]
        },
        {
          "type": "turn_right",
          "startRoad": "road_1_2_1",
          "endRoad": "road_1_3_0",
          "direction": 1,
          "laneLinks": [
            {
              "startLaneIndex": 2,
              "endLaneIndex": 0,
              "points": [
                {
                  "x": 10.0,
                  "y": 589.0
                },
                {
                  "x": 9.929,
                  "y": 590.143
                },
                {
                  "x": 9.752,
                  "y": 591.344
                },
                {
                  "x": 9.523,
                  "y": 592.561
                },
                {
                  "x": 9.296,
                  "y": 593.752
                },
                {
                  "x": 9.125,
                  "y": 594.875
                },
                {
                  "x": 9.064,
                  "y": 595.888
                },
                {
                  "x": 9.167,
                  "y": 596.749
                },
                {
                  "x": 9.488,
                  "y": 597.4159999999999
                },
                {
                  "x": 10.081,
                  "y": 597.847
                },
                {
                  "x": 11.0,
                  "y": 598.0
                }
              ]
            },
            {
              "startLaneIndex": 2,
              "endLaneIndex": 1,
              "points": [
                {
                  "x": 10.0,
                  "y": 589.0
                },
                {
                  "x": 9.929,
                  "y": 590.031
                },
                {
                  "x": 9.752,
                  "y": 590.928
                },
                {
                  "x": 9.523,
                  "y": 591.697
                },
                {
                  "x": 9.296,
                  "y": 592.344
                },
                {
                  "x": 9.125,
                  "y": 592.875
                },
                {
                  "x": 9.064,
                  "y": 593.296
                },
                {
                  "x": 9.167,
                  "y": 593.6129999999999
                },
                {
                  "x": 9.488,
                  "y": 593.8319999999999
                },
                {
                  "x": 10.081,
                  "y": 593.959
                },
                {
                  "x": 11.0,
                  "y": 594.0
                }
              ]
            },
            {
              "startLaneIndex": 2,
              "endLaneIndex": 2,
              "points": [
                {
                  "x": 10.0,
                  "y": 589.0
                },
                {
                  "x": 9.929,
                  "y": 589.919
                },
                {
                  "x": 9.752,
                  "y": 590.512
                },
                {
                  "x": 9.523,
                  "y": 590.833
                },
                {
                  "x": 9.296,
                  "y": 590.936
                },
                {
                  "x": 9.125,
                  "y": 590.875
                },
                {
                  "x": 9.064,
                  "y": 590.704
                },
                {
                  "x": 9.167,
                  "y": 590.477
                },
                {
                  "x": 9.488,
                  "y": 590.2479999999999
                },
                {
                  "x": 10.081,
                  "y": 590.071
                },
                {
                  "x": 11.0,
                  "y": 590.0
                }
              ]
            }
          ]
        },
        {
          "type": "go_straight",
          "startRoad": "road_1_2_1",
          "endRoad": "road_1_3_1",
          "direction": 1,
          "laneLinks": [
            {
              "startLaneIndex": 1,
              "endLaneIndex": 0,
              "points": [
                {
                  "x": 6.0,
                  "y": 589.0
                },
                {
                  "x": 5.888,
                  "y": 590.408
                },
                {
                  "x": 5.584,
                  "y": 592.344
                },
                {
                  "x": 5.136,
                  "y": 594.676
                },
                {
                  "x": 4.592,
                  "y": 597.272
                },
                {
                  "x": 4.0,
                  "y": 600.0
                },
                {
                  "x": 3.408,
                  "y": 602.728
                },
                {
                  "x": 2.864,
                  "y": 605.324
                },
                {
                  "x": 2.415999999999999,
                  "y": 607.656
                },
                {
                  "x": 2.112,
                  "y": 609.592
                },
                {
                  "x": 2.0,
                  "y": 611.0
                }
              ]
            },
            {
              "startLaneIndex": 1,
              "endLaneIndex": 1,
              "points": [
                {
                  "x": 6.0,
                  "y": 589.0
                },
                {
                  "x": 6.0,
                  "y": 590.408
                },
                {
                  "x": 6.0,
                  "y": 592.344
                },
                {
                  "x": 6.0,
                  "y": 594.676
                },
                {
                  "x": 6.0,
                  "y": 597.272
                },
                {
                  "x": 6.0,
                  "y": 600.0
                },
                {
                  "x": 6.0,
                  "y": 602.728
                },
                {
                  "x": 6.0,
                  "y": 605.324
                },
                {
                  "x": 5.999999999999999,
                  "y": 607.656
                },
                {
                  "x": 6.0,
                  "y": 609.592
                },
                {
                  "x": 6.0,
                  "y": 611.0
                }
              ]
            },
            {
              "startLaneIndex": 1,
              "endLaneIndex": 2,
              "points": [
                {
                  "x": 6.0,
                  "y": 589.0
                },
                {
                  "x": 6.112,
                  "y": 590.408
                },
                {
                  "x": 6.416,
                  "y": 592.344
                },
                {
                  "x": 6.864,
                  "y": 594.676
                },
                {
                  "x": 7.408,
                  "y": 597.272
                },
                {
                  "x": 8.0,
                  "y": 600.0
                },
                {
                  "x": 8.592,
                  "y": 602.728
                },
                {
                  "x": 9.136,
                  "y": 605.324
                },
                {
                  "x": 9.584,
                  "y": 607.656
                },
                {
                  "x": 9.888,
                  "y": 609.592
                },
                {
                  "x": 10.0,
                  "y": 611.0
                }
              ]
            }
          ]
        },
        {
          "type": "turn_left",
          "startRoad": "road_1_2_1",
          "endRoad": "road_1_3_2",
          "direction": 1,
          "laneLinks": [
            {
              "startLaneIndex": 0,
              "endLaneIndex": 0,
              "points": [
                {
                  "x": 2.0,
                  "y": 589.0
                },
                {
                  "x": 1.7349999999999999,
                  "y": 590.255
                },
                {
                  "x": 1.0,
                  "y": 591.76
                },
                {
                  "x": -0.115,
                  "y": 593.425
                },
                {
                  "x": -1.52,
                  "y": 595.16
                },
                {
                  "x": -3.125,
                  "y": 596.875
                },
                {
                  "x": -4.84,
                  "y": 598.48
                },
                {
                  "x": -6.575,
                  "y": 599.885
                },
                {
                  "x": -8.24,
                  "y": 600.9999999999999
                },
                {
                  "x": -9.745,
                  "y": 601.735
                },
                {
                  "x": -11.0,
                  "y": 602.0
                }
              ]
            },
            {
              "startLaneIndex": 0,
              "endLaneIndex": 1,
              "points": [
                {
                  "x": 2.0,
                  "y": 589.0
                },
                {
                  "x": 1.7349999999999999,
                  "y": 590.367
                },
                {
                  "x": 1.0,
                  "y": 592.176
                },
                {
                  "x": -0.115,
                  "y": 594.289
                },
                {
                  "x": -1.52,
                  "y": 596.568
                },
                {
                  "x": -3.125,
                  "y": 598.875
                },
                {
                  "x": -4.84,
                  "y": 601.072
                },
                {
                  "x": -6.575,
                  "y": 603.021
                },
                {
                  "x": -8.24,
                  "y": 604.584
                },
                {
                  "x": -9.745,
                  "y": 605.623
                },
                {
                  "x": -11.0,
                  "y": 606.0
                }
              ]
            },
            {
              "startLaneIndex": 0,
              "endLaneIndex": 2,
              "points": [
                {
                  "x": 2.0,
                  "y": 589.0
                },
                {
                  "x": 1.7349999999999999,
                  "y": 590.479
                },
                {
                  "x": 1.0,
                  "y": 592.592
                },
                {
                  "x": -0.115,
                  "y": 595.153
                },
                {
                  "x": -1.52,
                  "y": 597.976
                },
                {
                  "x": -3.125,
                  "y": 600.875
                },
                {
                  "x": -4.84,
                  "y": 603.664
                },
                {
                  "x": -6.575,
                  "y": 606.157
                },
                {
                  "x": -8.24,
                  "y": 608.1679999999999
                },
                {
                  "x": -9.745,
                  "y": 609.511
                },
                {
                  "x": -11.0,
                  "y": 610.0
                }
              ]
            }
          ]
        },
        {
          "type": "turn_right",
          "startRoad": "road_2_3_2",
          "endRoad": "road_1_3_1",
          "direction": 2,
          "laneLinks": [
            {
              "startLaneIndex": 2,
              "endLaneIndex": 0,
              "points": [
                {
                  "x": 11.0,
                  "y": 610.0
                },
                {
                  "x": 9.857,
                  "y": 609.929
                },
                {
                  "x": 8.656,
                  "y": 609.752
                },
                {
                  "x": 7.439,
                  "y": 609.523
                },
                {
                  "x": 6.248,
                  "y": 609.296
                },
                {
                  "x": 5.125,
                  "y": 609.125
                },
                {
                  "x": 4.112,
                  "y": 609.064
                },
                {
                  "x": 3.251000000000001,
                  "y": 609.167
                },
                {
                  "x": 2.584000000000001,
                  "y": 609.4879999999999
                },
                {
                  "x": 2.153,
                  "y": 610.081
                },
                {
                  "x": 2.0,
                  "y": 611.0
                }
              ]
            },
            {
              "startLaneIndex": 2,
              "endLaneIndex": 1,
              "points": [
                {
                  "x": 11.0,
                  "y": 610.0
                },
                {
                  "x": 9.969,
                  "y": 609.929
                },
                {
                  "x": 9.072,
                  "y": 609.752
                },
                {
                  "x": 8.303,
                  "y": 609.523
                },
                {
                  "x": 7.656,
                  "y": 609.296
                },
                {
                  "x": 7.125,
                  "y": 609.125
                },
                {
                  "x": 6.704,
                  "y": 609.064
                },
                {
                  "x": 6.387000000000001,
                  "y": 609.167
                },
                {
                  "x": 6.168000000000001,
                  "y": 609.4879999999999
                },
                {
                  "x": 6.0409999999999995,
                  "y": 610.081
                },
                {
                  "x": 6.0,
                  "y": 611.0
                }
              ]
            },
            {
              "startLaneIndex": 2,
              "endLaneIndex": 2,
              "points": [
                {
                  "x": 11.0,
                  "y": 610.0
                },
                {
                  "x": 10.081,
                  "y": 609.929
                },
                {
                  "x": 9.488,
                  "y": 609.752
                },
                {
                  "x": 9.167,
                  "y": 609.523
                },
                {
                  "x": 9.064,
                  "y": 609.296
                },
                {
                  "x": 9.125,
                  "y": 609.125
                },
                {
                  "x": 9.296,
                  "y": 609.064
                },
                {
                  "x": 9.523000000000001,
                  "y": 609.167
                },
                {
                  "x": 9.752,
                  "y": 609.4879999999999
                },
                {
                  "x": 9.929,
                  "y": 610.081
                },
                {
                  "x": 10.0,
                  "y": 611.0
                }
              ]
            }
          ]
        },
        {
          "type": "go_straight",
          "startRoad": "road_2_3_2",
          "endRoad": "road_1_3_2",
          "direction": 2,
          "laneLinks": [
            {
              "startLaneIndex": 1,
              "endLaneIndex": 0,
              "points": [
                {
                  "x": 11.0,
                  "y": 606.0
                },
                {
                  "x": 9.592,
                  "y": 605.888
                },
                {
                  "x": 7.656,
                  "y": 605.584
                },
                {
                  "x": 5.324,
                  "y": 605.136
                },
                {
                  "x": 2.7279999999999998,
                  "y": 604.592
                },
                {
                  "x": 0.0,
                  "y": 604.0
                },
                {
                  "x": -2.7279999999999998,
                  "y": 603.408
                },
                {
                  "x": -5.323999999999999,
                  "y": 602.864
                },
                {
                  "x": -7.655999999999999,
                  "y": 602.4159999999999
                },
                {
                  "x": -9.592,
                  "y": 602.112
                },
                {
                  "x": -11.0,
                  "y": 602.0
                }
              ]
            },
            {
              "startLaneIndex": 1,
              "endLaneIndex": 1,
              "points": [
                {
                  "x": 11.0,
                  "y": 606.0
                },
                {
                  "x": 9.592,
                  "y": 606.0
                },
                {
                  "x": 7.656,
                  "y": 606.0
                },
                {
                  "x": 5.324,
                  "y": 606.0
                },
                {
                  "x": 2.7279999999999998,
                  "y": 606.0
                },
                {
                  "x": 0.0,
                  "y": 606.0
                },
                {
                  "x": -2.7279999999999998,
                  "y": 606.0
                },
                {
                  "x": -5.323999999999999,
                  "y": 606.0
                },
                {
                  "x": -7.655999999999999,
                  "y": 605.9999999999999
                },
                {
                  "x": -9.592,
                  "y": 606.0
                },
                {
                  "x": -11.0,
                  "y": 606.0
                }
              ]
            },
            {
              "startLaneIndex": 1,
              "endLaneIndex": 2,
              "points": [
                {
                  "x": 11.0,
                  "y": 606.0
                },
                {
                  "x": 9.592,
                  "y": 606.112
                },
                {
                  "x": 7.656,
                  "y": 606.4159999999999
                },
                {
                  "x": 5.324,
                  "y": 606.864
                },
                {
                  "x": 2.7279999999999998,
                  "y": 607.408
                },
                {
                  "x": 0.0,
                  "y": 608.0
                },
                {
                  "x": -2.7279999999999998,
                  "y": 608.592
                },
                {
                  "x": -5.323999999999999,
                  "y": 609.136
                },
                {
                  "x": -7.655999999999999,
                  "y": 609.584
                },
                {
                  "x": -9.592,
                  "y": 609.888
                },
                {
                  "x": -11.0,
                  "y": 610.0
                }
              ]
            }
          ]
        },
        {
          "type": "turn_left",
          "startRoad": "road_2_3_2",
          "endRoad": "road_1_3_3",
          "direction": 2,
          "laneLinks": [
            {
              "startLaneIndex": 0,
              "endLaneIndex": 0,
              "points": [
                {
                  "x": 11.0,
                  "y": 602.0
                },
                {
                  "x": 9.745,
                  "y": 601.735
                },
                {
                  "x": 8.24,
                  "y": 601.0
                },
                {
                  "x": 6.575,
                  "y": 599.885
                },
                {
                  "x": 4.84,
                  "y": 598.48
                },
                {
                  "x": 3.125,
                  "y": 596.875
                },
                {
                  "x": 1.52,
                  "y": 595.16
                },
                {
                  "x": 0.115000000000001,
                  "y": 593.425
                },
                {
                  "x": -0.999999999999999,
                  "y": 591.7599999999999
                },
                {
                  "x": -1.735,
                  "y": 590.255
                },
                {
                  "x": -2.0,
                  "y": 589.0
                }
              ]
            },
            {
              "startLaneIndex": 0,
              "endLaneIndex": 1,
              "points": [
                {
                  "x": 11.0,
                  "y": 602.0
                },
                {
                  "x": 9.633,
                  "y": 601.735
                },
                {
                  "x": 7.824,
                  "y": 601.0
                },
                {
                  "x": 5.711,
                  "y": 599.885
                },
                {
                  "x": 3.432,
                  "y": 598.48
                },
                {
                  "x": 1.125,
                  "y": 596.875
                },
                {
                  "x": -1.072,
                  "y": 595.16
                },
                {
                  "x": -3.020999999999999,
                  "y": 593.425
                },
                {
                  "x": -4.583999999999999,
                  "y": 591.7599999999999
                },
                {
                  "x": -5.623,
                  "y": 590.255
                },
                {
                  "x": -6.0,
                  "y": 589.0
                }
              ]
            },
            {
              "startLaneIndex": 0,
              "endLaneIndex": 2,
              "points": [
                {
                  "x": 11.0,
                  "y": 602.0
                },
                {
                  "x": 9.521,
                  "y": 601.735
                },
                {
                  "x": 7.408,
                  "y": 601.0
                },
                {
                  "x": 4.8469999999999995,
                  "y": 599.885
                },
                {
                  "x": 2.024,
                  "y": 598.48
                },
                {
                  "x": -0.875,
                  "y": 596.875
                },
                {
                  "x": -3.664,
                  "y": 595.16
                },
                {
                  "x": -6.156999999999999,
                  "y": 593.425
                },
                {
                  "x": -8.168,
                  "y": 591.7599999999999
                },
                {
                  "x": -9.511,
                  "y": 590.255
                },
                {
                  "x": -10.0,
                  "y": 589.0
                }
              ]
            }
          ]
        },
        {
          "type": "turn_left",
          "startRoad": "road_1_4_3",
          "endRoad": "road_1_3_0",
          "direction": 3,
          "laneLinks": [
            {
              "startLaneIndex": 0,
              "endLaneIndex": 0,
              "points": [
                {
                  "x": -2.0,
                  "y": 611.0
                },
                {
                  "x": -1.7349999999999999,
                  "y": 609.745
                },
                {
                  "x": -1.0,
                  "y": 608.24
                },
                {
                  "x": 0.115,
                  "y": 606.575
                },
                {
                  "x": 1.52,
                  "y": 604.84
                },
                {
                  "x": 3.125,
                  "y": 603.125
                },
                {
                  "x": 4.84,
                  "y": 601.52
                },
                {
                  "x": 6.575,
                  "y": 600.115
                },
                {
                  "x": 8.24,
                  "y": 598.9999999999999
                },
                {
                  "x": 9.745,
                  "y": 598.265
                },
                {
                  "x": 11.0,
                  "y": 598.0
                }
              ]
            },
            {
              "startLaneIndex": 0,
              "endLaneIndex": 1,
              "points": [
                {
                  "x": -2.0,
                  "y": 611.0
                },
                {
                  "x": -1.7349999999999999,
                  "y": 609.633
                },
                {
                  "x": -1.0,
                  "y": 607.824
                },
                {
                  "x": 0.115,
                  "y": 605.711
                },
                {
                  "x": 1.52,
                  "y": 603.432
                },
                {
                  "x": 3.125,
                  "y": 601.125
                },
                {
                  "x": 4.84,
                  "y": 598.928
                },
                {
                  "x": 6.575,
                  "y": 596.979
                },
                {
                  "x": 8.24,
                  "y": 595.4159999999999
                },
                {
                  "x": 9.745,
                  "y": 594.377
                },
                {
                  "x": 11.0,
                  "y": 594.0
                }
              ]
            },
            {
              "startLaneIndex": 0,
              "endLaneIndex": 2,
              "points": [
                {
                  "x": -2.0,
                  "y": 611.0
                },
                {
                  "x": -1.7349999999999999,
                  "y": 609.521
                },
                {
                  "x": -1.0,
                  "y": 607.408
                },
                {
                  "x": 0.115,
                  "y": 604.847
                },
                {
                  "x": 1.52,
                  "y": 602.024
                },
                {
                  "x": 3.125,
                  "y": 599.125
                },
                {
                  "x": 4.84,
                  "y": 596.336
                },
                {
                  "x": 6.575,
                  "y": 593.843
                },
                {
                  "x": 8.24,
                  "y": 591.8319999999999
                },
                {
                  "x": 9.745,
                  "y": 590.489
                },
                {
                  "x": 11.0,
                  "y": 590.0
                }
              ]
            }
          ]
        },
        {
          "type": "turn_right",
          "startRoad": "road_1_4_3",
          "endRoad": "road_1_3_2",
          "direction": 3,
          "laneLinks": [
            {
              "startLaneIndex": 2,
              "endLaneIndex": 0,
              "points": [
                {
                  "x": -10.0,
                  "y": 611.0
                },
                {
                  "x": -9.929,
                  "y": 609.857
                },
                {
                  "x": -9.752,
                  "y": 608.656
                },
                {
                  "x": -9.523,
                  "y": 607.439
                },
                {
                  "x": -9.296,
                  "y": 606.248
                },
                {
                  "x": -9.125,
                  "y": 605.125
                },
                {
                  "x": -9.064,
                  "y": 604.112
                },
                {
                  "x": -9.167,
                  "y": 603.251
                },
                {
                  "x": -9.488,
                  "y": 602.584
                },
                {
                  "x": -10.081,
                  "y": 602.153
                },
                {
                  "x": -11.0,
                  "y": 602.0
                }
              ]
            },
            {
              "startLaneIndex": 2,
              "endLaneIndex": 1,
              "points": [
                {
                  "x": -10.0,
                  "y": 611.0
                },
                {
                  "x": -9.929,
                  "y": 609.969
                },
                {
                  "x": -9.752,
                  "y": 609.072
                },
                {
                  "x": -9.523,
                  "y": 608.303
                },
                {
                  "x": -9.296,
                  "y": 607.656
                },
                {
                  "x": -9.125,
                  "y": 607.125
                },
                {
                  "x": -9.064,
                  "y": 606.704
                },
                {
                  "x": -9.167,
                  "y": 606.387
                },
                {
                  "x": -9.488,
                  "y": 606.1679999999999
                },
                {
                  "x": -10.081,
                  "y": 606.0409999999999
                },
                {
                  "x": -11.0,
                  "y": 606.0
                }
              ]
            },
            {
              "startLaneIndex": 2,
              "endLaneIndex": 2,
              "points": [
                {
                  "x": -10.0,
                  "y": 611.0
                },
                {
                  "x": -9.929,
                  "y": 610.081
                },
                {
                  "x": -9.752,
                  "y": 609.488
                },
                {
                  "x": -9.523,
                  "y": 609.167
                },
                {
                  "x": -9.296,
                  "y": 609.064
                },
                {
                  "x": -9.125,
                  "y": 609.125
                },
                {
                  "x": -9.064,
                  "y": 609.296
                },
                {
                  "x": -9.167,
                  "y": 609.523
                },
                {
                  "x": -9.488,
                  "y": 609.752
                },
                {
                  "x": -10.081,
                  "y": 609.929
                },
                {
                  "x": -11.0,
                  "y": 610.0
                }
              ]
            }
          ]
        },
        {
          "type": "go_straight",
          "startRoad": "road_1_4_3",
          "endRoad": "road_1_3_3",
          "direction": 3,
          "laneLinks": [
            {
              "startLaneIndex": 1,
              "endLaneIndex": 0,
              "points": [
                {
                  "x": -6.0,
                  "y": 611.0
                },
                {
                  "x": -5.888,
                  "y": 609.592
                },
                {
                  "x": -5.584,
                  "y": 607.656
                },
                {
                  "x": -5.136,
                  "y": 605.324
                },
                {
                  "x": -4.592,
                  "y": 602.728
                },
                {
                  "x": -4.0,
                  "y": 600.0
                },
                {
                  "x": -3.408,
                  "y": 597.272
                },
                {
                  "x": -2.864,
                  "y": 594.676
                },
                {
                  "x": -2.415999999999999,
                  "y": 592.3439999999999
                },
                {
                  "x": -2.112,
                  "y": 590.408
                },
                {
                  "x": -2.0,
                  "y": 589.0
                }
              ]
            },
            {
              "startLaneIndex": 1,
              "endLaneIndex": 1,
              "points": [
                {
                  "x": -6.0,
                  "y": 611.0
                },
                {
                  "x": -6.0,
                  "y": 609.592
                },
                {
                  "x": -6.0,
                  "y": 607.656
                },
                {
                  "x": -6.0,
                  "y": 605.324
                },
                {
                  "x": -6.0,
                  "y": 602.728
                },
                {
                  "x": -6.0,
                  "y": 600.0
                },
                {
                  "x": -6.0,
                  "y": 597.272
                },
                {
                  "x": -6.0,
                  "y": 594.676
                },
                {
                  "x": -5.999999999999999,
                  "y": 592.3439999999999
                },
                {
                  "x": -6.0,
                  "y": 590.408
                },
                {
                  "x": -6.0,
                  "y": 589.0
                }
              ]
            },
            {
              "startLaneIndex": 1,
              "endLaneIndex": 2,
              "points": [
                {
                  "x": -6.0,
                  "y": 611.0
                },
                {
                  "x": -6.112,
                  "y": 609.592
                },
                {
                  "x": -6.416,
                  "y": 607.656
                },
                {
                  "x": -6.864,
                  "y": 605.324
                },
                {
                  "x": -7.408,
                  "y": 602.728
                },
                {
                  "x": -8.0,
                  "y": 600.0
                },
                {
                  "x": -8.592,
                  "y": 597.272
                },
                {
                  "x": -9.136,
                  "y": 594.676
                },
                {
                  "x": -9.584,
                  "y": 592.3439999999999
                },
                {
                  "x": -9.888,
                  "y": 590.408
                },
                {
                  "x": -10.0,
                  "y": 589.0
                }
              ]
            }
          ]
        }
      ],
      "trafficLight": {
        "roadLinkIndices": [
          0,
          1,
          2,
          3,
          4,
          5,
          6,
          7,
          8,
          9,
          10,
          11
        ],
        "lightphases": [
          {
            "time": 5,
            "availableRoadLinks": [
              10,
              2,
              3,
              6
            ]
          },
          {
            "time": 30,
            "availableRoadLinks": [
              0,
              2,
              3,
              6,
              7,
              10
            ]
          },
          {
            "time": 30,
            "availableRoadLinks": [
              2,
              3,
              4,
              6,
              10,
              11
            ]
          },
          {
            "time": 30,
            "availableRoadLinks": [
              1,
              2,
              3,
              6,
              8,
              10
            ]
          },
          {
            "time": 30,
            "availableRoadLinks": [
              2,
              3,
              5,
              6,
              9,
              10
            ]
          },
          {
            "time": 30,
            "availableRoadLinks": [
              0,
              1,
              2,
              3,
              6,
              10
            ]
          },
          {
            "time": 30,
            "availableRoadLinks": [
              2,
              3,
              6,
              7,
              8,
              10
            ]
          },
          {
            "time": 30,
            "availableRoadLinks": [
              2,
              3,
              4,
              5,
              6,
              10
            ]
          },
          {
            "time": 30,
            "availableRoadLinks": [
              2,
              3,
              6,
              9,
              10,
              11
            ]
          }
        ]
      },
      "virtual": false
    },
    {
      "id": "intersection_1_4",
      "point": {
        "x": 0,
        "y": 900
      },
      "width": 11,
      "roads": [
        "road_0_4_0",
        "road_1_3_1",
        "road_2_4_2",
        "road_1_5_3",
        "road_1_4_0",
        "road_1_4_1",
        "road_1_4_2",
        "road_1_4_3"
      ],
      "roadLinks": [
        {
          "type": "go_straight",
          "startRoad": "road_0_4_0",
          "endRoad": "road_1_4_0",
          "direction": 0,
          "laneLinks": [
            {
              "startLaneIndex": 1,
              "endLaneIndex": 0,
              "points": [
                {
                  "x": -11.0,
                  "y": 894.0
                },
                {
                  "x": -9.592,
                  "y": 894.112
                },
                {
                  "x": -7.656,
                  "y": 894.4159999999999
                },
                {
                  "x": -5.324,
                  "y": 894.864
                },
                {
                  "x": -2.7279999999999998,
                  "y": 895.408
                },
                {
                  "x": 0.0,
                  "y": 896.0
                },
                {
                  "x": 2.7279999999999998,
                  "y": 896.592
                },
                {
                  "x": 5.323999999999999,
                  "y": 897.136
                },
                {
                  "x": 7.655999999999999,
                  "y": 897.584
                },
                {
                  "x": 9.592,
                  "y": 897.888
                },
                {
                  "x": 11.0,
                  "y": 898.0
                }
              ]
            },
            {
              "startLaneIndex": 1,
              "endLaneIndex": 1,
              "points": [
                {
                  "x": -11.0,
                  "y": 894.0
                },
                {
                  "x": -9.592,
                  "y": 894.0
                },
                {
                  "x": -7.656,
                  "y": 894.0
                },
                {
                  "x": -5.324,
                  "y": 894.0
                },
                {
                  "x": -2.7279999999999998,
                  "y": 894.0
                },
                {
                  "x": 0.0,
                  "y": 894.0
                },
                {
                  "x": 2.7279999999999998,
                  "y": 894.0
                },
                {
                  "x": 5.323999999999999,
                  "y": 894.0
                },
                {
                  "x": 7.655999999999999,
                  "y": 893.9999999999999
                },
                {
                  "x": 9.592,
                  "y": 894.0
                },
                {
                  "x": 11.0,
                  "y": 894.0
                }
              ]
            },
            {
              "startLaneIndex": 1,
              "endLaneIndex": 2,
              "points": [
                {
                  "x": -11.0,
                  "y": 894.0
                },
                {
                  "x": -9.592,
                  "y": 893.888
                },
                {
                  "x": -7.656,
                  "y": 893.584
                },
                {
                  "x": -5.324,
                  "y": 893.136
                },
                {
                  "x": -2.7279999999999998,
                  "y": 892.592
                },
                {
                  "x": 0.0,
                  "y": 892.0
                },
                {
                  "x": 2.7279999999999998,
                  "y": 891.408
                },
                {
                  "x": 5.323999999999999,
                  "y": 890.864
                },
                {
                  "x": 7.655999999999999,
                  "y": 890.4159999999999
                },
                {
                  "x": 9.592,
                  "y": 890.112
                },
                {
                  "x": 11.0,
                  "y": 890.0
                }
              ]
            }
          ]
        },
        {
          "type": "turn_left",
          "startRoad": "road_0_4_0",
          "endRoad": "road_1_4_1",
          "direction": 0,
          "laneLinks": [
            {
              "startLaneIndex": 0,
              "endLaneIndex": 0,
              "points": [
                {
                  "x": -11.0,
                  "y": 898.0
                },
                {
                  "x": -9.745,
                  "y": 898.265
                },
                {
                  "x": -8.24,
                  "y": 899.0
                },
                {
                  "x": -6.575,
                  "y": 900.115
                },
                {
                  "x": -4.84,
                  "y": 901.52
                },
                {
                  "x": -3.125,
                  "y": 903.125
                },
                {
                  "x": -1.52,
                  "y": 904.84
                },
                {
                  "x": -0.115000000000001,
                  "y": 906.575
                },
                {
                  "x": 0.999999999999999,
                  "y": 908.2399999999999
                },
                {
                  "x": 1.735,
                  "y": 909.745
                },
                {
                  "x": 2.0,
                  "y": 911.0
                }
              ]
            },
            {
              "startLaneIndex": 0,
              "endLaneIndex": 1,
              "points": [
                {
                  "x": -11.0,
                  "y": 898.0
                },
                {
                  "x": -9.633,
                  "y": 898.265
                },
                {
                  "x": -7.824,
                  "y": 899.0
                },
                {
                  "x": -5.711,
                  "y": 900.115
                },
                {
                  "x": -3.432,
                  "y": 901.52
                },
                {
                  "x": -1.125,
                  "y": 903.125
                },
                {
                  "x": 1.072,
                  "y": 904.84
                },
                {
                  "x": 3.020999999999999,
                  "y": 906.575
                },
                {
                  "x": 4.583999999999999,
                  "y": 908.2399999999999
                },
                {
                  "x": 5.623,
                  "y": 909.745
                },
                {
                  "x": 6.0,
                  "y": 911.0
                }
              ]
            },
            {
              "startLaneIndex": 0,
              "endLaneIndex": 2,
              "points": [
                {
                  "x": -11.0,
                  "y": 898.0
                },
                {
                  "x": -9.521,
                  "y": 898.265
                },
                {
                  "x": -7.408,
                  "y": 899.0
                },
                {
                  "x": -4.8469999999999995,
                  "y": 900.115
                },
                {
                  "x": -2.024,
                  "y": 901.52
                },
                {
                  "x": 0.875,
                  "y": 903.125
                },
                {
                  "x": 3.664,
                  "y": 904.84
                },
                {
                  "x": 6.156999999999999,
                  "y": 906.575
                },
                {
                  "x": 8.168,
                  "y": 908.2399999999999
                },
                {
                  "x": 9.511,
                  "y": 909.745
                },
                {
                  "x": 10.0,
                  "y": 911.0
                }
              ]
            }
          ]
        },
        {
          "type": "turn_right",
          "startRoad": "road_0_4_0",
          "endRoad": "road_1_4_3",
          "direction": 0,
          "laneLinks": [
            {
              "startLaneIndex": 2,
              "endLaneIndex": 0,
              "points": [
                {
                  "x": -11.0,
                  "y": 890.0
                },
                {
                  "x": -9.857,
                  "y": 890.071
                },
                {
                  "x": -8.656,
                  "y": 890.248
                },
                {
                  "x": -7.439,
                  "y": 890.477
                },
                {
                  "x": -6.248,
                  "y": 890.704
                },
                {
                  "x": -5.125,
                  "y": 890.875
                },
                {
                  "x": -4.112,
                  "y": 890.936
                },
                {
                  "x": -3.251000000000001,
                  "y": 890.833
                },
                {
                  "x": -2.584000000000001,
                  "y": 890.512
                },
                {
                  "x": -2.153,
                  "y": 889.919
                },
                {
                  "x": -2.0,
                  "y": 889.0
                }
              ]
            },
            {
              "startLaneIndex": 2,
              "endLaneIndex": 1,
              "points": [
                {
                  "x": -11.0,
                  "y": 890.0
                },
                {
                  "x": -9.969,
                  "y": 890.071
                },
                {
                  "x": -9.072,
                  "y": 890.248
                },
                {
                  "x": -8.303,
                  "y": 890.477
                },
                {
                  "x": -7.656,
                  "y": 890.704
                },
                {
                  "x": -7.125,
                  "y": 890.875
                },
                {
                  "x": -6.704,
                  "y": 890.936
                },
                {
                  "x": -6.387000000000001,
                  "y": 890.833
                },
                {
                  "x": -6.168000000000001,
                  "y": 890.512
                },
                {
                  "x": -6.0409999999999995,
                  "y": 889.919
                },
                {
                  "x": -6.0,
                  "y": 889.0
                }
              ]
            },
            {
              "startLaneIndex": 2,
              "endLaneIndex": 2,
              "points": [
                {
                  "x": -11.0,
                  "y": 890.0
                },
                {
                  "x": -10.081,
                  "y": 890.071
                },
                {
                  "x": -9.488,
                  "y": 890.248
                },
                {
                  "x": -9.167,
                  "y": 890.477
                },
                {
                  "x": -9.064,
                  "y": 890.704
                },
                {
                  "x": -9.125,
                  "y": 890.875
                },
                {
                  "x": -9.296,
                  "y": 890.936
                },
                {
                  "x": -9.523000000000001,
                  "y": 890.833
                },
                {
                  "x": -9.752,
                  "y": 890.512
                },
                {
                  "x": -9.929,
                  "y": 889.919
                },
                {
                  "x": -10.0,
                  "y": 889.0
                }
              ]
            }
          ]
        },
        {
          "type": "turn_right",
          "startRoad": "road_1_3_1",
          "endRoad": "road_1_4_0",
          "direction": 1,
          "laneLinks": [
            {
              "startLaneIndex": 2,
              "endLaneIndex": 0,
              "points": [
                {
                  "x": 10.0,
                  "y": 889.0
                },
                {
                  "x": 9.929,
                  "y": 890.143
                },
                {
                  "x": 9.752,
                  "y": 891.344
                },
                {
                  "x": 9.523,
                  "y": 892.561
                },
                {
                  "x": 9.296,
                  "y": 893.752
                },
                {
                  "x": 9.125,
                  "y": 894.875
                },
                {
                  "x": 9.064,
                  "y": 895.888
                },
                {
                  "x": 9.167,
                  "y": 896.749
                },
                {
                  "x": 9.488,
                  "y": 897.4159999999999
                },
                {
                  "x": 10.081,
                  "y": 897.847
                },
                {
                  "x": 11.0,
                  "y": 898.0
                }
              ]
            },
            {
              "startLaneIndex": 2,
              "endLaneIndex": 1,
              "points": [
                {
                  "x": 10.0,
                  "y": 889.0
                },
                {
                  "x": 9.929,
                  "y": 890.031
                },
                {
                  "x": 9.752,
                  "y": 890.928
                },
                {
                  "x": 9.523,
                  "y": 891.697
                },
                {
                  "x": 9.296,
                  "y": 892.344
                },
                {
                  "x": 9.125,
                  "y": 892.875
                },
                {
                  "x": 9.064,
                  "y": 893.296
                },
                {
                  "x": 9.167,
                  "y": 893.6129999999999
                },
                {
                  "x": 9.488,
                  "y": 893.8319999999999
                },
                {
                  "x": 10.081,
                  "y": 893.959
                },
                {
                  "x": 11.0,
                  "y": 894.0
                }
              ]
            },
            {
              "startLaneIndex": 2,
              "endLaneIndex": 2,
              "points": [
                {
                  "x": 10.0,
                  "y": 889.0
                },
                {
                  "x": 9.929,
                  "y": 889.919
                },
                {
                  "x": 9.752,
                  "y": 890.512
                },
                {
                  "x": 9.523,
                  "y": 890.833
                },
                {
                  "x": 9.296,
                  "y": 890.936
                },
                {
                  "x": 9.125,
                  "y": 890.875
                },
                {
                  "x": 9.064,
                  "y": 890.704
                },
                {
                  "x": 9.167,
                  "y": 890.477
                },
                {
                  "x": 9.488,
                  "y": 890.2479999999999
                },
                {
                  "x": 10.081,
                  "y": 890.071
                },
                {
                  "x": 11.0,
                  "y": 890.0
                }
              ]
            }
          ]
        },
        {
          "type": "go_straight",
          "startRoad": "road_1_3_1",
          "endRoad": "road_1_4_1",
          "direction": 1,
          "laneLinks": [
            {
              "startLaneIndex": 1,
              "endLaneIndex": 0,
              "points": [
                {
                  "x": 6.0,
                  "y": 889.0
                },
                {
                  "x": 5.888,
                  "y": 890.408
                },
                {
                  "x": 5.584,
                  "y": 892.344
                },
                {
                  "x": 5.136,
                  "y": 894.676
                },
                {
                  "x": 4.592,
                  "y": 897.272
                },
                {
                  "x": 4.0,
                  "y": 900.0
                },
                {
                  "x": 3.408,
                  "y": 902.728
                },
                {
                  "x": 2.864,
                  "y": 905.324
                },
                {
                  "x": 2.415999999999999,
                  "y": 907.656
                },
                {
                  "x": 2.112,
                  "y": 909.592
                },
                {
                  "x": 2.0,
                  "y": 911.0
                }
              ]
            },
            {
              "startLaneIndex": 1,
              "endLaneIndex": 1,
              "points": [
                {
                  "x": 6.0,
                  "y": 889.0
                },
                {
                  "x": 6.0,
                  "y": 890.408
                },
                {
                  "x": 6.0,
                  "y": 892.344
                },
                {
                  "x": 6.0,
                  "y": 894.676
                },
                {
                  "x": 6.0,
                  "y": 897.272
                },
                {
                  "x": 6.0,
                  "y": 900.0
                },
                {
                  "x": 6.0,
                  "y": 902.728
                },
                {
                  "x": 6.0,
                  "y": 905.324
                },
                {
                  "x": 5.999999999999999,
                  "y": 907.656
                },
                {
                  "x": 6.0,
                  "y": 909.592
                },
                {
                  "x": 6.0,
                  "y": 911.0
                }
              ]
            },
            {
              "startLaneIndex": 1,
              "endLaneIndex": 2,
              "points": [
                {
                  "x": 6.0,
                  "y": 889.0
                },
                {
                  "x": 6.112,
                  "y": 890.408
                },
                {
                  "x": 6.416,
                  "y": 892.344
                },
                {
                  "x": 6.864,
                  "y": 894.676
                },
                {
                  "x": 7.408,
                  "y": 897.272
                },
                {
                  "x": 8.0,
                  "y": 900.0
                },
                {
                  "x": 8.592,
                  "y": 902.728
                },
                {
                  "x": 9.136,
                  "y": 905.324
                },
                {
                  "x": 9.584,
                  "y": 907.656
                },
                {
                  "x": 9.888,
                  "y": 909.592
                },
                {
                  "x": 10.0,
                  "y": 911.0
                }
              ]
            }
          ]
        },
        {
          "type": "turn_left",
          "startRoad": "road_1_3_1",
          "endRoad": "road_1_4_2",
          "direction": 1,
          "laneLinks": [
            {
              "startLaneIndex": 0,
              "endLaneIndex": 0,
              "points": [
                {
                  "x": 2.0,
                  "y": 889.0
                },
                {
                  "x": 1.7349999999999999,
                  "y": 890.255
                },
                {
                  "x": 1.0,
                  "y": 891.76
                },
                {
                  "x": -0.115,
                  "y": 893.425
                },
                {
                  "x": -1.52,
                  "y": 895.16
                },
                {
                  "x": -3.125,
                  "y": 896.875
                },
                {
                  "x": -4.84,
                  "y": 898.48
                },
                {
                  "x": -6.575,
                  "y": 899.885
                },
                {
                  "x": -8.24,
                  "y": 900.9999999999999
                },
                {
                  "x": -9.745,
                  "y": 901.735
                },
                {
                  "x": -11.0,
                  "y": 902.0
                }
              ]
            },
            {
              "startLaneIndex": 0,
              "endLaneIndex": 1,
              "points": [
                {
                  "x": 2.0,
                  "y": 889.0
                },
                {
                  "x": 1.7349999999999999,
                  "y": 890.367
                },
                {
                  "x": 1.0,
                  "y": 892.176
                },
                {
                  "x": -0.115,
                  "y": 894.289
                },
                {
                  "x": -1.52,
                  "y": 896.568
                },
                {
                  "x": -3.125,
                  "y": 898.875
                },
                {
                  "x": -4.84,
                  "y": 901.072
                },
                {
                  "x": -6.575,
                  "y": 903.021
                },
                {
                  "x": -8.24,
                  "y": 904.584
                },
                {
                  "x": -9.745,
                  "y": 905.623
                },
                {
                  "x": -11.0,
                  "y": 906.0
                }
              ]
            },
            {
              "startLaneIndex": 0,
              "endLaneIndex": 2,
              "points": [
                {
                  "x": 2.0,
                  "y": 889.0
                },
                {
                  "x": 1.7349999999999999,
                  "y": 890.479
                },
                {
                  "x": 1.0,
                  "y": 892.592
                },
                {
                  "x": -0.115,
                  "y": 895.153
                },
                {
                  "x": -1.52,
                  "y": 897.976
                },
                {
                  "x": -3.125,
                  "y": 900.875
                },
                {
                  "x": -4.84,
                  "y": 903.664
                },
                {
                  "x": -6.575,
                  "y": 906.157
                },
                {
                  "x": -8.24,
                  "y": 908.1679999999999
                },
                {
                  "x": -9.745,
                  "y": 909.511
                },
                {
                  "x": -11.0,
                  "y": 910.0
                }
              ]
            }
          ]
        },
        {
          "type": "turn_right",
          "startRoad": "road_2_4_2",
          "endRoad": "road_1_4_1",
          "direction": 2,
          "laneLinks": [
            {
              "startLaneIndex": 2,
              "endLaneIndex": 0,
              "points": [
                {
                  "x": 11.0,
                  "y": 910.0
                },
                {
                  "x": 9.857,
                  "y": 909.929
                },
                {
                  "x": 8.656,
                  "y": 909.752
                },
                {
                  "x": 7.439,
                  "y": 909.523
                },
                {
                  "x": 6.248,
                  "y": 909.296
                },
                {
                  "x": 5.125,
                  "y": 909.125
                },
                {
                  "x": 4.112,
                  "y": 909.064
                },
                {
                  "x": 3.251000000000001,
                  "y": 909.167
                },
                {
                  "x": 2.584000000000001,
                  "y": 909.4879999999999
                },
                {
                  "x": 2.153,
                  "y": 910.081
                },
                {
                  "x": 2.0,
                  "y": 911.0
                }
              ]
            },
            {
              "startLaneIndex": 2,
              "endLaneIndex": 1,
              "points": [
                {
                  "x": 11.0,
                  "y": 910.0
                },
                {
                  "x": 9.969,
                  "y": 909.929
                },
                {
                  "x": 9.072,
                  "y": 909.752
                },
                {
                  "x": 8.303,
                  "y": 909.523
                },
                {
                  "x": 7.656,
                  "y": 909.296
                },
                {
                  "x": 7.125,
                  "y": 909.125
                },
                {
                  "x": 6.704,
                  "y": 909.064
                },
                {
                  "x": 6.387000000000001,
                  "y": 909.167
                },
                {
                  "x": 6.168000000000001,
                  "y": 909.4879999999999
                },
                {
                  "x": 6.0409999999999995,
                  "y": 910.081
                },
                {
                  "x": 6.0,
                  "y": 911.0
                }
              ]
            },
            {
              "startLaneIndex": 2,
              "endLaneIndex": 2,
              "points": [
                {
                  "x": 11.0,
                  "y": 910.0
                },
                {
                  "x": 10.081,
                  "y": 909.929
                },
                {
                  "x": 9.488,
                  "y": 909.752
                },
                {
                  "x": 9.167,
                  "y": 909.523
                },
                {
                  "x": 9.064,
                  "y": 909.296
                },
                {
                  "x": 9.125,
                  "y": 909.125
                },
                {
                  "x": 9.296,
                  "y": 909.064
                },
                {
                  "x": 9.523000000000001,
                  "y": 909.167
                },
                {
                  "x": 9.752,
                  "y": 909.4879999999999
                },
                {
                  "x": 9.929,
                  "y": 910.081
                },
                {
                  "x": 10.0,
                  "y": 911.0
                }
              ]
            }
          ]
        },
        {
          "type": "go_straight",
          "startRoad": "road_2_4_2",
          "endRoad": "road_1_4_2",
          "direction": 2,
          "laneLinks": [
            {
              "startLaneIndex": 1,
              "endLaneIndex": 0,
              "points": [
                {
                  "x": 11.0,
                  "y": 906.0
                },
                {
                  "x": 9.592,
                  "y": 905.888
                },
                {
                  "x": 7.656,
                  "y": 905.584
                },
                {
                  "x": 5.324,
                  "y": 905.136
                },
                {
                  "x": 2.7279999999999998,
                  "y": 904.592
                },
                {
                  "x": 0.0,
                  "y": 904.0
                },
                {
                  "x": -2.7279999999999998,
                  "y": 903.408
                },
                {
                  "x": -5.323999999999999,
                  "y": 902.864
                },
                {
                  "x": -7.655999999999999,
                  "y": 902.4159999999999
                },
                {
                  "x": -9.592,
                  "y": 902.112
                },
                {
                  "x": -11.0,
                  "y": 902.0
                }
              ]
            },
            {
              "startLaneIndex": 1,
              "endLaneIndex": 1,
              "points": [
                {
                  "x": 11.0,
                  "y": 906.0
                },
                {
                  "x": 9.592,
                  "y": 906.0
                },
                {
                  "x": 7.656,
                  "y": 906.0
                },
                {
                  "x": 5.324,
                  "y": 906.0
                },
                {
                  "x": 2.7279999999999998,
                  "y": 906.0
                },
                {
                  "x": 0.0,
                  "y": 906.0
                },
                {
                  "x": -2.7279999999999998,
                  "y": 906.0
                },
                {
                  "x": -5.323999999999999,
                  "y": 906.0
                },
                {
                  "x": -7.655999999999999,
                  "y": 905.9999999999999
                },
                {
                  "x": -9.592,
                  "y": 906.0
                },
                {
                  "x": -11.0,
                  "y": 906.0
                }
              ]
            },
            {
              "startLaneIndex": 1,
              "endLaneIndex": 2,
              "points": [
                {
                  "x": 11.0,
                  "y": 906.0
                },
                {
                  "x": 9.592,
                  "y": 906.112
                },
                {
                  "x": 7.656,
                  "y": 906.4159999999999
                },
                {
                  "x": 5.324,
                  "y": 906.864
                },
                {
                  "x": 2.7279999999999998,
                  "y": 907.408
                },
                {
                  "x": 0.0,
                  "y": 908.0
                },
                {
                  "x": -2.7279999999999998,
                  "y": 908.592
                },
                {
                  "x": -5.323999999999999,
                  "y": 909.136
                },
                {
                  "x": -7.655999999999999,
                  "y": 909.584
                },
                {
                  "x": -9.592,
                  "y": 909.888
                },
                {
                  "x": -11.0,
                  "y": 910.0
                }
              ]
            }
          ]
        },
        {
          "type": "turn_left",
          "startRoad": "road_2_4_2",
          "endRoad": "road_1_4_3",
          "direction": 2,
          "laneLinks": [
            {
              "startLaneIndex": 0,
              "endLaneIndex": 0,
              "points": [
                {
                  "x": 11.0,
                  "y": 902.0
                },
                {
                  "x": 9.745,
                  "y": 901.735
                },
                {
                  "x": 8.24,
                  "y": 901.0
                },
                {
                  "x": 6.575,
                  "y": 899.885
                },
                {
                  "x": 4.84,
                  "y": 898.48
                },
                {
                  "x": 3.125,
                  "y": 896.875
                },
                {
                  "x": 1.52,
                  "y": 895.16
                },
                {
                  "x": 0.115000000000001,
                  "y": 893.425
                },
                {
                  "x": -0.999999999999999,
                  "y": 891.7599999999999
                },
                {
                  "x": -1.735,
                  "y": 890.255
                },
                {
                  "x": -2.0,
                  "y": 889.0
                }
              ]
            },
            {
              "startLaneIndex": 0,
              "endLaneIndex": 1,
              "points": [
                {
                  "x": 11.0,
                  "y": 902.0
                },
                {
                  "x": 9.633,
                  "y": 901.735
                },
                {
                  "x": 7.824,
                  "y": 901.0
                },
                {
                  "x": 5.711,
                  "y": 899.885
                },
                {
                  "x": 3.432,
                  "y": 898.48
                },
                {
                  "x": 1.125,
                  "y": 896.875
                },
                {
                  "x": -1.072,
                  "y": 895.16
                },
                {
                  "x": -3.020999999999999,
                  "y": 893.425
                },
                {
                  "x": -4.583999999999999,
                  "y": 891.7599999999999
                },
                {
                  "x": -5.623,
                  "y": 890.255
                },
                {
                  "x": -6.0,
                  "y": 889.0
                }
              ]
            },
            {
              "startLaneIndex": 0,
              "endLaneIndex": 2,
              "points": [
                {
                  "x": 11.0,
                  "y": 902.0
                },
                {
                  "x": 9.521,
                  "y": 901.735
                },
                {
                  "x": 7.408,
                  "y": 901.0
                },
                {
                  "x": 4.8469999999999995,
                  "y": 899.885
                },
                {
                  "x": 2.024,
                  "y": 898.48
                },
                {
                  "x": -0.875,
                  "y": 896.875
                },
                {
                  "x": -3.664,
                  "y": 895.16
                },
                {
                  "x": -6.156999999999999,
                  "y": 893.425
                },
                {
                  "x": -8.168,
                  "y": 891.7599999999999
                },
                {
                  "x": -9.511,
                  "y": 890.255
                },
                {
                  "x": -10.0,
                  "y": 889.0
                }
              ]
            }
          ]
        },
        {
          "type": "turn_left",
          "startRoad": "road_1_5_3",
          "endRoad": "road_1_4_0",
          "direction": 3,
          "laneLinks": [
            {
              "startLaneIndex": 0,
              "endLaneIndex": 0,
              "points": [
                {
                  "x": -2.0,
                  "y": 911.0
                },
                {
                  "x": -1.7349999999999999,
                  "y": 909.745
                },
                {
                  "x": -1.0,
                  "y": 908.24
                },
                {
                  "x": 0.115,
                  "y": 906.575
                },
                {
                  "x": 1.52,
                  "y": 904.84
                },
                {
                  "x": 3.125,
                  "y": 903.125
                },
                {
                  "x": 4.84,
                  "y": 901.52
                },
                {
                  "x": 6.575,
                  "y": 900.115
                },
                {
                  "x": 8.24,
                  "y": 898.9999999999999
                },
                {
                  "x": 9.745,
                  "y": 898.265
                },
                {
                  "x": 11.0,
                  "y": 898.0
                }
              ]
            },
            {
              "startLaneIndex": 0,
              "endLaneIndex": 1,
              "points": [
                {
                  "x": -2.0,
                  "y": 911.0
                },
                {
                  "x": -1.7349999999999999,
                  "y": 909.633
                },
                {
                  "x": -1.0,
                  "y": 907.824
                },
                {
                  "x": 0.115,
                  "y": 905.711
                },
                {
                  "x": 1.52,
                  "y": 903.432
                },
                {
                  "x": 3.125,
                  "y": 901.125
                },
                {
                  "x": 4.84,
                  "y": 898.928
                },
                {
                  "x": 6.575,
                  "y": 896.979
                },
                {
                  "x": 8.24,
                  "y": 895.4159999999999
                },
                {
                  "x": 9.745,
                  "y": 894.377
                },
                {
                  "x": 11.0,
                  "y": 894.0
                }
              ]
            },
            {
              "startLaneIndex": 0,
              "endLaneIndex": 2,
              "points": [
                {
                  "x": -2.0,
                  "y": 911.0
                },
                {
                  "x": -1.7349999999999999,
                  "y": 909.521
                },
                {
                  "x": -1.0,
                  "y": 907.408
                },
                {
                  "x": 0.115,
                  "y": 904.847
                },
                {
                  "x": 1.52,
                  "y": 902.024
                },
                {
                  "x": 3.125,
                  "y": 899.125
                },
                {
                  "x": 4.84,
                  "y": 896.336
                },
                {
                  "x": 6.575,
                  "y": 893.843
                },
                {
                  "x": 8.24,
                  "y": 891.8319999999999
                },
                {
                  "x": 9.745,
                  "y": 890.489
                },
                {
                  "x": 11.0,
                  "y": 890.0
                }
              ]
            }
          ]
        },
        {
          "type": "turn_right",
          "startRoad": "road_1_5_3",
          "endRoad": "road_1_4_2",
          "direction": 3,
          "laneLinks": [
            {
              "startLaneIndex": 2,
              "endLaneIndex": 0,
              "points": [
                {
                  "x": -10.0,
                  "y": 911.0
                },
                {
                  "x": -9.929,
                  "y": 909.857
                },
                {
                  "x": -9.752,
                  "y": 908.656
                },
                {
                  "x": -9.523,
                  "y": 907.439
                },
                {
                  "x": -9.296,
                  "y": 906.248
                },
                {
                  "x": -9.125,
                  "y": 905.125
                },
                {
                  "x": -9.064,
                  "y": 904.112
                },
                {
                  "x": -9.167,
                  "y": 903.251
                },
                {
                  "x": -9.488,
                  "y": 902.584
                },
                {
                  "x": -10.081,
                  "y": 902.153
                },
                {
                  "x": -11.0,
                  "y": 902.0
                }
              ]
            },
            {
              "startLaneIndex": 2,
              "endLaneIndex": 1,
              "points": [
                {
                  "x": -10.0,
                  "y": 911.0
                },
                {
                  "x": -9.929,
                  "y": 909.969
                },
                {
                  "x": -9.752,
                  "y": 909.072
                },
                {
                  "x": -9.523,
                  "y": 908.303
                },
                {
                  "x": -9.296,
                  "y": 907.656
                },
                {
                  "x": -9.125,
                  "y": 907.125
                },
                {
                  "x": -9.064,
                  "y": 906.704
                },
                {
                  "x": -9.167,
                  "y": 906.387
                },
                {
                  "x": -9.488,
                  "y": 906.1679999999999
                },
                {
                  "x": -10.081,
                  "y": 906.0409999999999
                },
                {
                  "x": -11.0,
                  "y": 906.0
                }
              ]
            },
            {
              "startLaneIndex": 2,
              "endLaneIndex": 2,
              "points": [
                {
                  "x": -10.0,
                  "y": 911.0
                },
                {
                  "x": -9.929,
                  "y": 910.081
                },
                {
                  "x": -9.752,
                  "y": 909.488
                },
                {
                  "x": -9.523,
                  "y": 909.167
                },
                {
                  "x": -9.296,
                  "y": 909.064
                },
                {
                  "x": -9.125,
                  "y": 909.125
                },
                {
                  "x": -9.064,
                  "y": 909.296
                },
                {
                  "x": -9.167,
                  "y": 909.523
                },
                {
                  "x": -9.488,
                  "y": 909.752
                },
                {
                  "x": -10.081,
                  "y": 909.929
                },
                {
                  "x": -11.0,
                  "y": 910.0
                }
              ]
            }
          ]
        },
        {
          "type": "go_straight",
          "startRoad": "road_1_5_3",
          "endRoad": "road_1_4_3",
          "direction": 3,
          "laneLinks": [
            {
              "startLaneIndex": 1,
              "endLaneIndex": 0,
              "points": [
                {
                  "x": -6.0,
                  "y": 911.0
                },
                {
                  "x": -5.888,
                  "y": 909.592
                },
                {
                  "x": -5.584,
                  "y": 907.656
                },
                {
                  "x": -5.136,
                  "y": 905.324
                },
                {
                  "x": -4.592,
                  "y": 902.728
                },
                {
                  "x": -4.0,
                  "y": 900.0
                },
                {
                  "x": -3.408,
                  "y": 897.272
                },
                {
                  "x": -2.864,
                  "y": 894.676
                },
                {
                  "x": -2.415999999999999,
                  "y": 892.3439999999999
                },
                {
                  "x": -2.112,
                  "y": 890.408
                },
                {
                  "x": -2.0,
                  "y": 889.0
                }
              ]
            },
            {
              "startLaneIndex": 1,
              "endLaneIndex": 1,
              "points": [
                {
                  "x": -6.0,
                  "y": 911.0
                },
                {
                  "x": -6.0,
                  "y": 909.592
                },
                {
                  "x": -6.0,
                  "y": 907.656
                },
                {
                  "x": -6.0,
                  "y": 905.324
                },
                {
                  "x": -6.0,
                  "y": 902.728
                },
                {
                  "x": -6.0,
                  "y": 900.0
                },
                {
                  "x": -6.0,
                  "y": 897.272
                },
                {
                  "x": -6.0,
                  "y": 894.676
                },
                {
                  "x": -5.999999999999999,
                  "y": 892.3439999999999
                },
                {
                  "x": -6.0,
                  "y": 890.408
                },
                {
                  "x": -6.0,
                  "y": 889.0
                }
              ]
            },
            {
              "startLaneIndex": 1,
              "endLaneIndex": 2,
              "points": [
                {
                  "x": -6.0,
                  "y": 911.0
                },
                {
                  "x": -6.112,
                  "y": 909.592
                },
                {
                  "x": -6.416,
                  "y": 907.656
                },
                {
                  "x": -6.864,
                  "y": 905.324
                },
                {
                  "x": -7.408,
                  "y": 902.728
                },
                {
                  "x": -8.0,
                  "y": 900.0
                },
                {
                  "x": -8.592,
                  "y": 897.272
                },
                {
                  "x": -9.136,
                  "y": 894.676
                },
                {
                  "x": -9.584,
                  "y": 892.3439999999999
                },
                {
                  "x": -9.888,
                  "y": 890.408
                },
                {
                  "x": -10.0,
                  "y": 889.0
                }
              ]
            }
          ]
        }
      ],
      "trafficLight": {
        "roadLinkIndices": [
          0,
          1,
          2,
          3,
          4,
          5,
          6,
          7,
          8,
          9,
          10,
          11
        ],
        "lightphases": [
          {
            "time": 5,
            "availableRoadLinks": [
              10,
              2,
              3,
              6
            ]
          },
          {
            "time": 30,
            "availableRoadLinks": [
              0,
              2,
              3,
              6,
              7,
              10
            ]
          },
          {
            "time": 30,
            "availableRoadLinks": [
              2,
              3,
              4,
              6,
              10,
              11
            ]
          },
          {
            "time": 30,
            "availableRoadLinks": [
              1,
              2,
              3,
              6,
              8,
              10
            ]
          },
          {
            "time": 30,
            "availableRoadLinks": [
              2,
              3,
              5,
              6,
              9,
              10
            ]
          },
          {
            "time": 30,
            "availableRoadLinks": [
              0,
              1,
              2,
              3,
              6,
              10
            ]
          },
          {
            "time": 30,
            "availableRoadLinks": [
              2,
              3,
              6,
              7,
              8,
              10
            ]
          },
          {
            "time": 30,
            "availableRoadLinks": [
              2,
              3,
              4,
              5,
              6,
              10
            ]
          },
          {
            "time": 30,
            "availableRoadLinks": [
              2,
              3,
              6,
              9,
              10,
              11
            ]
          }
        ]
      },
      "virtual": false
    },
    {
      "id": "intersection_1_5",
      "point": {
        "x": 0,
        "y": 1200
      },
      "width": 11,
      "roads": [
        "road_0_5_0",
        "road_1_4_1",
        "road_2_5_2",
        "road_1_6_3",
        "road_1_5_0",
        "road_1_5_1",
        "road_1_5_2",
        "road_1_5_3"
      ],
      "roadLinks": [
        {
          "type": "go_straight",
          "startRoad": "road_0_5_0",
          "endRoad": "road_1_5_0",
          "direction": 0,
          "laneLinks": [
            {
              "startLaneIndex": 1,
              "endLaneIndex": 0,
              "points": [
                {
                  "x": -11.0,
                  "y": 1194.0
                },
                {
                  "x": -9.592,
                  "y": 1194.112
                },
                {
                  "x": -7.656,
                  "y": 1194.416
                },
                {
                  "x": -5.324,
                  "y": 1194.864
                },
                {
                  "x": -2.7279999999999998,
                  "y": 1195.408
                },
                {
                  "x": 0.0,
                  "y": 1196.0
                },
                {
                  "x": 2.7279999999999998,
                  "y": 1196.592
                },
                {
                  "x": 5.323999999999999,
                  "y": 1197.136
                },
                {
                  "x": 7.655999999999999,
                  "y": 1197.584
                },
                {
                  "x": 9.592,
                  "y": 1197.888
                },
                {
                  "x": 11.0,
                  "y": 1198.0
                }
              ]
            },
            {
              "startLaneIndex": 1,
              "endLaneIndex": 1,
              "points": [
                {
                  "x": -11.0,
                  "y": 1194.0
                },
                {
                  "x": -9.592,
                  "y": 1194.0
                },
                {
                  "x": -7.656,
                  "y": 1194.0
                },
                {
                  "x": -5.324,
                  "y": 1194.0
                },
                {
                  "x": -2.7279999999999998,
                  "y": 1194.0
                },
                {
                  "x": 0.0,
                  "y": 1194.0
                },
                {
                  "x": 2.7279999999999998,
                  "y": 1194.0
                },
                {
                  "x": 5.323999999999999,
                  "y": 1194.0
                },
                {
                  "x": 7.655999999999999,
                  "y": 1194.0
                },
                {
                  "x": 9.592,
                  "y": 1194.0
                },
                {
                  "x": 11.0,
                  "y": 1194.0
                }
              ]
            },
            {
              "startLaneIndex": 1,
              "endLaneIndex": 2,
              "points": [
                {
                  "x": -11.0,
                  "y": 1194.0
                },
                {
                  "x": -9.592,
                  "y": 1193.888
                },
                {
                  "x": -7.656,
                  "y": 1193.584
                },
                {
                  "x": -5.324,
                  "y": 1193.136
                },
                {
                  "x": -2.7279999999999998,
                  "y": 1192.592
                },
                {
                  "x": 0.0,
                  "y": 1192.0
                },
                {
                  "x": 2.7279999999999998,
                  "y": 1191.408
                },
                {
                  "x": 5.323999999999999,
                  "y": 1190.864
                },
                {
                  "x": 7.655999999999999,
                  "y": 1190.416
                },
                {
                  "x": 9.592,
                  "y": 1190.112
                },
                {
                  "x": 11.0,
                  "y": 1190.0
                }
              ]
            }
          ]
        },
        {
          "type": "turn_left",
          "startRoad": "road_0_5_0",
          "endRoad": "road_1_5_1",
          "direction": 0,
          "laneLinks": [
            {
              "startLaneIndex": 0,
              "endLaneIndex": 0,
              "points": [
                {
                  "x": -11.0,
                  "y": 1198.0
                },
                {
                  "x": -9.745,
                  "y": 1198.2649999999999
                },
                {
                  "x": -8.24,
                  "y": 1199.0
                },
                {
                  "x": -6.575,
                  "y": 1200.115
                },
                {
                  "x": -4.84,
                  "y": 1201.52
                },
                {
                  "x": -3.125,
                  "y": 1203.125
                },
                {
                  "x": -1.52,
                  "y": 1204.84
                },
                {
                  "x": -0.115000000000001,
                  "y": 1206.575
                },
                {
                  "x": 0.999999999999999,
                  "y": 1208.24
                },
                {
                  "x": 1.735,
                  "y": 1209.745
                },
                {
                  "x": 2.0,
                  "y": 1211.0
                }
              ]
            },
            {
              "startLaneIndex": 0,
              "endLaneIndex": 1,
              "points": [
                {
                  "x": -11.0,
                  "y": 1198.0
                },
                {
                  "x": -9.633,
                  "y": 1198.2649999999999
                },
                {
                  "x": -7.824,
                  "y": 1199.0
                },
                {
                  "x": -5.711,
                  "y": 1200.115
                },
                {
                  "x": -3.432,
                  "y": 1201.52
                },
                {
                  "x": -1.125,
                  "y": 1203.125
                },
                {
                  "x": 1.072,
                  "y": 1204.84
                },
                {
                  "x": 3.020999999999999,
                  "y": 1206.575
                },
                {
                  "x": 4.583999999999999,
                  "y": 1208.24
                },
                {
                  "x": 5.623,
                  "y": 1209.745
                },
                {
                  "x": 6.0,
                  "y": 1211.0
                }
              ]
            },
            {
              "startLaneIndex": 0,
              "endLaneIndex": 2,
              "points": [
                {
                  "x": -11.0,
                  "y": 1198.0
                },
                {
                  "x": -9.521,
                  "y": 1198.2649999999999
                },
                {
                  "x": -7.408,
                  "y": 1199.0
                },
                {
                  "x": -4.8469999999999995,
                  "y": 1200.115
                },
                {
                  "x": -2.024,
                  "y": 1201.52
                },
                {
                  "x": 0.875,
                  "y": 1203.125
                },
                {
                  "x": 3.664,
                  "y": 1204.84
                },
                {
                  "x": 6.156999999999999,
                  "y": 1206.575
                },
                {
                  "x": 8.168,
                  "y": 1208.24
                },
                {
                  "x": 9.511,
                  "y": 1209.745
                },
                {
                  "x": 10.0,
                  "y": 1211.0
                }
              ]
            }
          ]
        },
        {
          "type": "turn_right",
          "startRoad": "road_0_5_0",
          "endRoad": "road_1_5_3",
          "direction": 0,
          "laneLinks": [
            {
              "startLaneIndex": 2,
              "endLaneIndex": 0,
              "points": [
                {
                  "x": -11.0,
                  "y": 1190.0
                },
                {
                  "x": -9.857,
                  "y": 1190.071
                },
                {
                  "x": -8.656,
                  "y": 1190.248
                },
                {
                  "x": -7.439,
                  "y": 1190.477
                },
                {
                  "x": -6.248,
                  "y": 1190.704
                },
                {
                  "x": -5.125,
                  "y": 1190.875
                },
                {
                  "x": -4.112,
                  "y": 1190.936
                },
                {
                  "x": -3.251000000000001,
                  "y": 1190.833
                },
                {
                  "x": -2.584000000000001,
                  "y": 1190.512
                },
                {
                  "x": -2.153,
                  "y": 1189.919
                },
                {
                  "x": -2.0,
                  "y": 1189.0
                }
              ]
            },
            {
              "startLaneIndex": 2,
              "endLaneIndex": 1,
              "points": [
                {
                  "x": -11.0,
                  "y": 1190.0
                },
                {
                  "x": -9.969,
                  "y": 1190.071
                },
                {
                  "x": -9.072,
                  "y": 1190.248
                },
                {
                  "x": -8.303,
                  "y": 1190.477
                },
                {
                  "x": -7.656,
                  "y": 1190.704
                },
                {
                  "x": -7.125,
                  "y": 1190.875
                },
                {
                  "x": -6.704,
                  "y": 1190.936
                },
                {
                  "x": -6.387000000000001,
                  "y": 1190.833
                },
                {
                  "x": -6.168000000000001,
                  "y": 1190.512
                },
                {
                  "x": -6.0409999999999995,
                  "y": 1189.919
                },
                {
                  "x": -6.0,
                  "y": 1189.0
                }
              ]
            },
            {
              "startLaneIndex": 2,
              "endLaneIndex": 2,
              "points": [
                {
                  "x": -11.0,
                  "y": 1190.0
                },
                {
                  "x": -10.081,
                  "y": 1190.071
                },
                {
                  "x": -9.488,
                  "y": 1190.248
                },
                {
                  "x": -9.167,
                  "y": 1190.477
                },
                {
                  "x": -9.064,
                  "y": 1190.704
                },
                {
                  "x": -9.125,
                  "y": 1190.875
                },
                {
                  "x": -9.296,
                  "y": 1190.936
                },
                {
                  "x": -9.523000000000001,
                  "y": 1190.833
                },
                {
                  "x": -9.752,
                  "y": 1190.512
                },
                {
                  "x": -9.929,
                  "y": 1189.919
                },
                {
                  "x": -10.0,
                  "y": 1189.0
                }
              ]
            }
          ]
        },
        {
          "type": "turn_right",
          "startRoad": "road_1_4_1",
          "endRoad": "road_1_5_0",
          "direction": 1,
          "laneLinks": [
            {
              "startLaneIndex": 2,
              "endLaneIndex": 0,
              "points": [
                {
                  "x": 10.0,
                  "y": 1189.0
                },
                {
                  "x": 9.929,
                  "y": 1190.143
                },
                {
                  "x": 9.752,
                  "y": 1191.344
                },
                {
                  "x": 9.523,
                  "y": 1192.561
                },
                {
                  "x": 9.296,
                  "y": 1193.752
                },
                {
                  "x": 9.125,
                  "y": 1194.875
                },
                {
                  "x": 9.064,
                  "y": 1195.888
                },
                {
                  "x": 9.167,
                  "y": 1196.749
                },
                {
                  "x": 9.488,
                  "y": 1197.416
                },
                {
                  "x": 10.081,
                  "y": 1197.847
                },
                {
                  "x": 11.0,
                  "y": 1198.0
                }
              ]
            },
            {
              "startLaneIndex": 2,
              "endLaneIndex": 1,
              "points": [
                {
                  "x": 10.0,
                  "y": 1189.0
                },
                {
                  "x": 9.929,
                  "y": 1190.031
                },
                {
                  "x": 9.752,
                  "y": 1190.9279999999999
                },
                {
                  "x": 9.523,
                  "y": 1191.697
                },
                {
                  "x": 9.296,
                  "y": 1192.344
                },
                {
                  "x": 9.125,
                  "y": 1192.875
                },
                {
                  "x": 9.064,
                  "y": 1193.296
                },
                {
                  "x": 9.167,
                  "y": 1193.613
                },
                {
                  "x": 9.488,
                  "y": 1193.8319999999999
                },
                {
                  "x": 10.081,
                  "y": 1193.959
                },
                {
                  "x": 11.0,
                  "y": 1194.0
                }
              ]
            },
            {
              "startLaneIndex": 2,
              "endLaneIndex": 2,
              "points": [
                {
                  "x": 10.0,
                  "y": 1189.0
                },
                {
                  "x": 9.929,
                  "y": 1189.919
                },
                {
                  "x": 9.752,
                  "y": 1190.512
                },
                {
                  "x": 9.523,
                  "y": 1190.833
                },
                {
                  "x": 9.296,
                  "y": 1190.936
                },
                {
                  "x": 9.125,
                  "y": 1190.875
                },
                {
                  "x": 9.064,
                  "y": 1190.704
                },
                {
                  "x": 9.167,
                  "y": 1190.477
                },
                {
                  "x": 9.488,
                  "y": 1190.248
                },
                {
                  "x": 10.081,
                  "y": 1190.071
                },
                {
                  "x": 11.0,
                  "y": 1190.0
                }
              ]
            }
          ]
        },
        {
          "type": "go_straight",
          "startRoad": "road_1_4_1",
          "endRoad": "road_1_5_1",
          "direction": 1,
          "laneLinks": [
            {
              "startLaneIndex": 1,
              "endLaneIndex": 0,
              "points": [
                {
                  "x": 6.0,
                  "y": 1189.0
                },
                {
                  "x": 5.888,
                  "y": 1190.408
                },
                {
                  "x": 5.584,
                  "y": 1192.344
                },
                {
                  "x": 5.136,
                  "y": 1194.676
                },
                {
                  "x": 4.592,
                  "y": 1197.272
                },
                {
                  "x": 4.0,
                  "y": 1200.0
                },
                {
                  "x": 3.408,
                  "y": 1202.728
                },
                {
                  "x": 2.864,
                  "y": 1205.324
                },
                {
                  "x": 2.415999999999999,
                  "y": 1207.656
                },
                {
                  "x": 2.112,
                  "y": 1209.592
                },
                {
                  "x": 2.0,
                  "y": 1211.0
                }
              ]
            },
            {
              "startLaneIndex": 1,
              "endLaneIndex": 1,
              "points": [
                {
                  "x": 6.0,
                  "y": 1189.0
                },
                {
                  "x": 6.0,
                  "y": 1190.408
                },
                {
                  "x": 6.0,
                  "y": 1192.344
                },
                {
                  "x": 6.0,
                  "y": 1194.676
                },
                {
                  "x": 6.0,
                  "y": 1197.272
                },
                {
                  "x": 6.0,
                  "y": 1200.0
                },
                {
                  "x": 6.0,
                  "y": 1202.728
                },
                {
                  "x": 6.0,
                  "y": 1205.324
                },
                {
                  "x": 5.999999999999999,
                  "y": 1207.656
                },
                {
                  "x": 6.0,
                  "y": 1209.592
                },
                {
                  "x": 6.0,
                  "y": 1211.0
                }
              ]
            },
            {
              "startLaneIndex": 1,
              "endLaneIndex": 2,
              "points": [
                {
                  "x": 6.0,
                  "y": 1189.0
                },
                {
                  "x": 6.112,
                  "y": 1190.408
                },
                {
                  "x": 6.416,
                  "y": 1192.344
                },
                {
                  "x": 6.864,
                  "y": 1194.676
                },
                {
                  "x": 7.408,
                  "y": 1197.272
                },
                {
                  "x": 8.0,
                  "y": 1200.0
                },
                {
                  "x": 8.592,
                  "y": 1202.728
                },
                {
                  "x": 9.136,
                  "y": 1205.324
                },
                {
                  "x": 9.584,
                  "y": 1207.656
                },
                {
                  "x": 9.888,
                  "y": 1209.592
                },
                {
                  "x": 10.0,
                  "y": 1211.0
                }
              ]
            }
          ]
        },
        {
          "type": "turn_left",
          "startRoad": "road_1_4_1",
          "endRoad": "road_1_5_2",
          "direction": 1,
          "laneLinks": [
            {
              "startLaneIndex": 0,
              "endLaneIndex": 0,
              "points": [
                {
                  "x": 2.0,
                  "y": 1189.0
                },
                {
                  "x": 1.7349999999999999,
                  "y": 1190.255
                },
                {
                  "x": 1.0,
                  "y": 1191.76
                },
                {
                  "x": -0.115,
                  "y": 1193.425
                },
                {
                  "x": -1.52,
                  "y": 1195.16
                },
                {
                  "x": -3.125,
                  "y": 1196.875
                },
                {
                  "x": -4.84,
                  "y": 1198.48
                },
                {
                  "x": -6.575,
                  "y": 1199.885
                },
                {
                  "x": -8.24,
                  "y": 1201.0
                },
                {
                  "x": -9.745,
                  "y": 1201.735
                },
                {
                  "x": -11.0,
                  "y": 1202.0
                }
              ]
            },
            {
              "startLaneIndex": 0,
              "endLaneIndex": 1,
              "points": [
                {
                  "x": 2.0,
                  "y": 1189.0
                },
                {
                  "x": 1.7349999999999999,
                  "y": 1190.367
                },
                {
                  "x": 1.0,
                  "y": 1192.176
                },
                {
                  "x": -0.115,
                  "y": 1194.289
                },
                {
                  "x": -1.52,
                  "y": 1196.568
                },
                {
                  "x": -3.125,
                  "y": 1198.875
                },
                {
                  "x": -4.84,
                  "y": 1201.072
                },
                {
                  "x": -6.575,
                  "y": 1203.021
                },
                {
                  "x": -8.24,
                  "y": 1204.584
                },
                {
                  "x": -9.745,
                  "y": 1205.623
                },
                {
                  "x": -11.0,
                  "y": 1206.0
                }
              ]
            },
            {
              "startLaneIndex": 0,
              "endLaneIndex": 2,
              "points": [
                {
                  "x": 2.0,
                  "y": 1189.0
                },
                {
                  "x": 1.7349999999999999,
                  "y": 1190.479
                },
                {
                  "x": 1.0,
                  "y": 1192.592
                },
                {
                  "x": -0.115,
                  "y": 1195.153
                },
                {
                  "x": -1.52,
                  "y": 1197.976
                },
                {
                  "x": -3.125,
                  "y": 1200.875
                },
                {
                  "x": -4.84,
                  "y": 1203.664
                },
                {
                  "x": -6.575,
                  "y": 1206.157
                },
                {
                  "x": -8.24,
                  "y": 1208.168
                },
                {
                  "x": -9.745,
                  "y": 1209.511
                },
                {
                  "x": -11.0,
                  "y": 1210.0
                }
              ]
            }
          ]
        },
        {
          "type": "turn_right",
          "startRoad": "road_2_5_2",
          "endRoad": "road_1_5_1",
          "direction": 2,
          "laneLinks": [
            {
              "startLaneIndex": 2,
              "endLaneIndex": 0,
              "points": [
                {
                  "x": 11.0,
                  "y": 1210.0
                },
                {
                  "x": 9.857,
                  "y": 1209.929
                },
                {
                  "x": 8.656,
                  "y": 1209.752
                },
                {
                  "x": 7.439,
                  "y": 1209.523
                },
                {
                  "x": 6.248,
                  "y": 1209.296
                },
                {
                  "x": 5.125,
                  "y": 1209.125
                },
                {
                  "x": 4.112,
                  "y": 1209.064
                },
                {
                  "x": 3.251000000000001,
                  "y": 1209.167
                },
                {
                  "x": 2.584000000000001,
                  "y": 1209.488
                },
                {
                  "x": 2.153,
                  "y": 1210.081
                },
                {
                  "x": 2.0,
                  "y": 1211.0
                }
              ]
            },
            {
              "startLaneIndex": 2,
              "endLaneIndex": 1,
              "points": [
                {
                  "x": 11.0,
                  "y": 1210.0
                },
                {
                  "x": 9.969,
                  "y": 1209.929
                },
                {
                  "x": 9.072,
                  "y": 1209.752
                },
                {
                  "x": 8.303,
                  "y": 1209.523
                },
                {
                  "x": 7.656,
                  "y": 1209.296
                },
                {
                  "x": 7.125,
                  "y": 1209.125
                },
                {
                  "x": 6.704,
                  "y": 1209.064
                },
                {
                  "x": 6.387000000000001,
                  "y": 1209.167
                },
                {
                  "x": 6.168000000000001,
                  "y": 1209.488
                },
                {
                  "x": 6.0409999999999995,
                  "y": 1210.081
                },
                {
                  "x": 6.0,
                  "y": 1211.0
                }
              ]
            },
            {
              "startLaneIndex": 2,
              "endLaneIndex": 2,
              "points": [
                {
                  "x": 11.0,
                  "y": 1210.0
                },
                {
                  "x": 10.081,
                  "y": 1209.929
                },
                {
                  "x": 9.488,
                  "y": 1209.752
                },
                {
                  "x": 9.167,
                  "y": 1209.523
                },
                {
                  "x": 9.064,
                  "y": 1209.296
                },
                {
                  "x": 9.125,
                  "y": 1209.125
                },
                {
                  "x": 9.296,
                  "y": 1209.064
                },
                {
                  "x": 9.523000000000001,
                  "y": 1209.167
                },
                {
                  "x": 9.752,
                  "y": 1209.488
                },
                {
                  "x": 9.929,
                  "y": 1210.081
                },
                {
                  "x": 10.0,
                  "y": 1211.0
                }
              ]
            }
          ]
        },
        {
          "type": "go_straight",
          "startRoad": "road_2_5_2",
          "endRoad": "road_1_5_2",
          "direction": 2,
          "laneLinks": [
            {
              "startLaneIndex": 1,
              "endLaneIndex": 0,
              "points": [
                {
                  "x": 11.0,
                  "y": 1206.0
                },
                {
                  "x": 9.592,
                  "y": 1205.888
                },
                {
                  "x": 7.656,
                  "y": 1205.584
                },
                {
                  "x": 5.324,
                  "y": 1205.136
                },
                {
                  "x": 2.7279999999999998,
                  "y": 1204.592
                },
                {
                  "x": 0.0,
                  "y": 1204.0
                },
                {
                  "x": -2.7279999999999998,
                  "y": 1203.408
                },
                {
                  "x": -5.323999999999999,
                  "y": 1202.864
                },
                {
                  "x": -7.655999999999999,
                  "y": 1202.416
                },
                {
                  "x": -9.592,
                  "y": 1202.112
                },
                {
                  "x": -11.0,
                  "y": 1202.0
                }
              ]
            },
            {
              "startLaneIndex": 1,
              "endLaneIndex": 1,
              "points": [
                {
                  "x": 11.0,
                  "y": 1206.0
                },
                {
                  "x": 9.592,
                  "y": 1206.0
                },
                {
                  "x": 7.656,
                  "y": 1206.0
                },
                {
                  "x": 5.324,
                  "y": 1206.0
                },
                {
                  "x": 2.7279999999999998,
                  "y": 1206.0
                },
                {
                  "x": 0.0,
                  "y": 1206.0
                },
                {
                  "x": -2.7279999999999998,
                  "y": 1206.0
                },
                {
                  "x": -5.323999999999999,
                  "y": 1206.0
                },
                {
                  "x": -7.655999999999999,
                  "y": 1206.0
                },
                {
                  "x": -9.592,
                  "y": 1206.0
                },
                {
                  "x": -11.0,
                  "y": 1206.0
                }
              ]
            },
            {
              "startLaneIndex": 1,
              "endLaneIndex": 2,
              "points": [
                {
                  "x": 11.0,
                  "y": 1206.0
                },
                {
                  "x": 9.592,
                  "y": 1206.112
                },
                {
                  "x": 7.656,
                  "y": 1206.416
                },
                {
                  "x": 5.324,
                  "y": 1206.864
                },
                {
                  "x": 2.7279999999999998,
                  "y": 1207.408
                },
                {
                  "x": 0.0,
                  "y": 1208.0
                },
                {
                  "x": -2.7279999999999998,
                  "y": 1208.592
                },
                {
                  "x": -5.323999999999999,
                  "y": 1209.136
                },
                {
                  "x": -7.655999999999999,
                  "y": 1209.584
                },
                {
                  "x": -9.592,
                  "y": 1209.888
                },
                {
                  "x": -11.0,
                  "y": 1210.0
                }
              ]
            }
          ]
        },
        {
          "type": "turn_left",
          "startRoad": "road_2_5_2",
          "endRoad": "road_1_5_3",
          "direction": 2,
          "laneLinks": [
            {
              "startLaneIndex": 0,
              "endLaneIndex": 0,
              "points": [
                {
                  "x": 11.0,
                  "y": 1202.0
                },
                {
                  "x": 9.745,
                  "y": 1201.735
                },
                {
                  "x": 8.24,
                  "y": 1201.0
                },
                {
                  "x": 6.575,
                  "y": 1199.885
                },
                {
                  "x": 4.84,
                  "y": 1198.48
                },
                {
                  "x": 3.125,
                  "y": 1196.875
                },
                {
                  "x": 1.52,
                  "y": 1195.16
                },
                {
                  "x": 0.115000000000001,
                  "y": 1193.425
                },
                {
                  "x": -0.999999999999999,
                  "y": 1191.76
                },
                {
                  "x": -1.735,
                  "y": 1190.255
                },
                {
                  "x": -2.0,
                  "y": 1189.0
                }
              ]
            },
            {
              "startLaneIndex": 0,
              "endLaneIndex": 1,
              "points": [
                {
                  "x": 11.0,
                  "y": 1202.0
                },
                {
                  "x": 9.633,
                  "y": 1201.735
                },
                {
                  "x": 7.824,
                  "y": 1201.0
                },
                {
                  "x": 5.711,
                  "y": 1199.885
                },
                {
                  "x": 3.432,
                  "y": 1198.48
                },
                {
                  "x": 1.125,
                  "y": 1196.875
                },
                {
                  "x": -1.072,
                  "y": 1195.16
                },
                {
                  "x": -3.020999999999999,
                  "y": 1193.425
                },
                {
                  "x": -4.583999999999999,
                  "y": 1191.76
                },
                {
                  "x": -5.623,
                  "y": 1190.255
                },
                {
                  "x": -6.0,
                  "y": 1189.0
                }
              ]
            },
            {
              "startLaneIndex": 0,
              "endLaneIndex": 2,
              "points": [
                {
                  "x": 11.0,
                  "y": 1202.0
                },
                {
                  "x": 9.521,
                  "y": 1201.735
                },
                {
                  "x": 7.408,
                  "y": 1201.0
                },
                {
                  "x": 4.8469999999999995,
                  "y": 1199.885
                },
                {
                  "x": 2.024,
                  "y": 1198.48
                },
                {
                  "x": -0.875,
                  "y": 1196.875
                },
                {
                  "x": -3.664,
                  "y": 1195.16
                },
                {
                  "x": -6.156999999999999,
                  "y": 1193.425
                },
                {
                  "x": -8.168,
                  "y": 1191.76
                },
                {
                  "x": -9.511,
                  "y": 1190.255
                },
                {
                  "x": -10.0,
                  "y": 1189.0
                }
              ]
            }
          ]
        },
        {
          "type": "turn_left",
          "startRoad": "road_1_6_3",
          "endRoad": "road_1_5_0",
          "direction": 3,
          "laneLinks": [
            {
              "startLaneIndex": 0,
              "endLaneIndex": 0,
              "points": [
                {
                  "x": -2.0,
                  "y": 1211.0
                },
                {
                  "x": -1.7349999999999999,
                  "y": 1209.745
                },
                {
                  "x": -1.0,
                  "y": 1208.24
                },
                {
                  "x": 0.115,
                  "y": 1206.575
                },
                {
                  "x": 1.52,
                  "y": 1204.84
                },
                {
                  "x": 3.125,
                  "y": 1203.125
                },
                {
                  "x": 4.84,
                  "y": 1201.52
                },
                {
                  "x": 6.575,
                  "y": 1200.115
                },
                {
                  "x": 8.24,
                  "y": 1199.0
                },
                {
                  "x": 9.745,
                  "y": 1198.2649999999999
                },
                {
                  "x": 11.0,
                  "y": 1198.0
                }
              ]
            },
            {
              "startLaneIndex": 0,
              "endLaneIndex": 1,
              "points": [
                {
                  "x": -2.0,
                  "y": 1211.0
                },
                {
                  "x": -1.7349999999999999,
                  "y": 1209.633
                },
                {
                  "x": -1.0,
                  "y": 1207.824
                },
                {
                  "x": 0.115,
                  "y": 1205.711
                },
                {
                  "x": 1.52,
                  "y": 1203.432
                },
                {
                  "x": 3.125,
                  "y": 1201.125
                },
                {
                  "x": 4.84,
                  "y": 1198.9279999999999
                },
                {
                  "x": 6.575,
                  "y": 1196.979
                },
                {
                  "x": 8.24,
                  "y": 1195.416
                },
                {
                  "x": 9.745,
                  "y": 1194.377
                },
                {
                  "x": 11.0,
                  "y": 1194.0
                }
              ]
            },
            {
              "startLaneIndex": 0,
              "endLaneIndex": 2,
              "points": [
                {
                  "x": -2.0,
                  "y": 1211.0
                },
                {
                  "x": -1.7349999999999999,
                  "y": 1209.521
                },
                {
                  "x": -1.0,
                  "y": 1207.408
                },
                {
                  "x": 0.115,
                  "y": 1204.847
                },
                {
                  "x": 1.52,
                  "y": 1202.024
                },
                {
                  "x": 3.125,
                  "y": 1199.125
                },
                {
                  "x": 4.84,
                  "y": 1196.336
                },
                {
                  "x": 6.575,
                  "y": 1193.843
                },
                {
                  "x": 8.24,
                  "y": 1191.8319999999999
                },
                {
                  "x": 9.745,
                  "y": 1190.489
                },
                {
                  "x": 11.0,
                  "y": 1190.0
                }
              ]
            }
          ]
        },
        {
          "type": "turn_right",
          "startRoad": "road_1_6_3",
          "endRoad": "road_1_5_2",
          "direction": 3,
          "laneLinks": [
            {
              "startLaneIndex": 2,
              "endLaneIndex": 0,
              "points": [
                {
                  "x": -10.0,
                  "y": 1211.0
                },
                {
                  "x": -9.929,
                  "y": 1209.857
                },
                {
                  "x": -9.752,
                  "y": 1208.656
                },
                {
                  "x": -9.523,
                  "y": 1207.439
                },
                {
                  "x": -9.296,
                  "y": 1206.248
                },
                {
                  "x": -9.125,
                  "y": 1205.125
                },
                {
                  "x": -9.064,
                  "y": 1204.112
                },
                {
                  "x": -9.167,
                  "y": 1203.251
                },
                {
                  "x": -9.488,
                  "y": 1202.584
                },
                {
                  "x": -10.081,
                  "y": 1202.153
                },
                {
                  "x": -11.0,
                  "y": 1202.0
                }
              ]
            },
            {
              "startLaneIndex": 2,
              "endLaneIndex": 1,
              "points": [
                {
                  "x": -10.0,
                  "y": 1211.0
                },
                {
                  "x": -9.929,
                  "y": 1209.969
                },
                {
                  "x": -9.752,
                  "y": 1209.072
                },
                {
                  "x": -9.523,
                  "y": 1208.3029999999999
                },
                {
                  "x": -9.296,
                  "y": 1207.656
                },
                {
                  "x": -9.125,
                  "y": 1207.125
                },
                {
                  "x": -9.064,
                  "y": 1206.704
                },
                {
                  "x": -9.167,
                  "y": 1206.387
                },
                {
                  "x": -9.488,
                  "y": 1206.168
                },
                {
                  "x": -10.081,
                  "y": 1206.041
                },
                {
                  "x": -11.0,
                  "y": 1206.0
                }
              ]
            },
            {
              "startLaneIndex": 2,
              "endLaneIndex": 2,
              "points": [
                {
                  "x": -10.0,
                  "y": 1211.0
                },
                {
                  "x": -9.929,
                  "y": 1210.081
                },
                {
                  "x": -9.752,
                  "y": 1209.488
                },
                {
                  "x": -9.523,
                  "y": 1209.167
                },
                {
                  "x": -9.296,
                  "y": 1209.064
                },
                {
                  "x": -9.125,
                  "y": 1209.125
                },
                {
                  "x": -9.064,
                  "y": 1209.296
                },
                {
                  "x": -9.167,
                  "y": 1209.523
                },
                {
                  "x": -9.488,
                  "y": 1209.752
                },
                {
                  "x": -10.081,
                  "y": 1209.929
                },
                {
                  "x": -11.0,
                  "y": 1210.0
                }
              ]
            }
          ]
        },
        {
          "type": "go_straight",
          "startRoad": "road_1_6_3",
          "endRoad": "road_1_5_3",
          "direction": 3,
          "laneLinks": [
            {
              "startLaneIndex": 1,
              "endLaneIndex": 0,
              "points": [
                {
                  "x": -6.0,
                  "y": 1211.0
                },
                {
                  "x": -5.888,
                  "y": 1209.592
                },
                {
                  "x": -5.584,
                  "y": 1207.656
                },
                {
                  "x": -5.136,
                  "y": 1205.324
                },
                {
                  "x": -4.592,
                  "y": 1202.728
                },
                {
                  "x": -4.0,
                  "y": 1200.0
                },
                {
                  "x": -3.408,
                  "y": 1197.272
                },
                {
                  "x": -2.864,
                  "y": 1194.676
                },
                {
                  "x": -2.415999999999999,
                  "y": 1192.344
                },
                {
                  "x": -2.112,
                  "y": 1190.408
                },
                {
                  "x": -2.0,
                  "y": 1189.0
                }
              ]
            },
            {
              "startLaneIndex": 1,
              "endLaneIndex": 1,
              "points": [
                {
                  "x": -6.0,
                  "y": 1211.0
                },
                {
                  "x": -6.0,
                  "y": 1209.592
                },
                {
                  "x": -6.0,
                  "y": 1207.656
                },
                {
                  "x": -6.0,
                  "y": 1205.324
                },
                {
                  "x": -6.0,
                  "y": 1202.728
                },
                {
                  "x": -6.0,
                  "y": 1200.0
                },
                {
                  "x": -6.0,
                  "y": 1197.272
                },
                {
                  "x": -6.0,
                  "y": 1194.676
                },
                {
                  "x": -5.999999999999999,
                  "y": 1192.344
                },
                {
                  "x": -6.0,
                  "y": 1190.408
                },
                {
                  "x": -6.0,
                  "y": 1189.0
                }
              ]
            },
            {
              "startLaneIndex": 1,
              "endLaneIndex": 2,
              "points": [
                {
                  "x": -6.0,
                  "y": 1211.0
                },
                {
                  "x": -6.112,
                  "y": 1209.592
                },
                {
                  "x": -6.416,
                  "y": 1207.656
                },
                {
                  "x": -6.864,
                  "y": 1205.324
                },
                {
                  "x": -7.408,
                  "y": 1202.728
                },
                {
                  "x": -8.0,
                  "y": 1200.0
                },
                {
                  "x": -8.592,
                  "y": 1197.272
                },
                {
                  "x": -9.136,
                  "y": 1194.676
                },
                {
                  "x": -9.584,
                  "y": 1192.344
                },
                {
                  "x": -9.888,
                  "y": 1190.408
                },
                {
                  "x": -10.0,
                  "y": 1189.0
                }
              ]
            }
          ]
        }
      ],
      "trafficLight": {
        "roadLinkIndices": [
          0,
          1,
          2,
          3,
          4,
          5,
          6,
          7,
          8,
          9,
          10,
          11
        ],
        "lightphases": [
          {
            "time": 5,
            "availableRoadLinks": [
              10,
              2,
              3,
              6
            ]
          },
          {
            "time": 30,
            "availableRoadLinks": [
              0,
              2,
              3,
              6,
              7,
              10
            ]
          },
          {
            "time": 30,
            "availableRoadLinks": [
              2,
              3,
              4,
              6,
              10,
              11
            ]
          },
          {
            "time": 30,
            "availableRoadLinks": [
              1,
              2,
              3,
              6,
              8,
              10
            ]
          },
          {
            "time": 30,
            "availableRoadLinks": [
              2,
              3,
              5,
              6,
              9,
              10
            ]
          },
          {
            "time": 30,
            "availableRoadLinks": [
              0,
              1,
              2,
              3,
              6,
              10
            ]
          },
          {
            "time": 30,
            "availableRoadLinks": [
              2,
              3,
              6,
              7,
              8,
              10
            ]
          },
          {
            "time": 30,
            "availableRoadLinks": [
              2,
              3,
              4,
              5,
              6,
              10
            ]
          },
          {
            "time": 30,
            "availableRoadLinks": [
              2,
              3,
              6,
              9,
              10,
              11
            ]
          }
        ]
      },
      "virtual": false
    },
    {
      "id": "intersection_1_6",
      "point": {
        "x": 0,
        "y": 1500
      },
      "width": 11,
      "roads": [
        "road_0_6_0",
        "road_1_5_1",
        "road_2_6_2",
        "road_1_7_3",
        "road_1_6_0",
        "road_1_6_1",
        "road_1_6_2",
        "road_1_6_3"
      ],
      "roadLinks": [
        {
          "type": "go_straight",
          "startRoad": "road_0_6_0",
          "endRoad": "road_1_6_0",
          "direction": 0,
          "laneLinks": [
            {
              "startLaneIndex": 1,
              "endLaneIndex": 0,
              "points": [
                {
                  "x": -11.0,
                  "y": 1494.0
                },
                {
                  "x": -9.592,
                  "y": 1494.112
                },
                {
                  "x": -7.656,
                  "y": 1494.416
                },
                {
                  "x": -5.324,
                  "y": 1494.864
                },
                {
                  "x": -2.7279999999999998,
                  "y": 1495.408
                },
                {
                  "x": 0.0,
                  "y": 1496.0
                },
                {
                  "x": 2.7279999999999998,
                  "y": 1496.592
                },
                {
                  "x": 5.323999999999999,
                  "y": 1497.136
                },
                {
                  "x": 7.655999999999999,
                  "y": 1497.584
                },
                {
                  "x": 9.592,
                  "y": 1497.888
                },
                {
                  "x": 11.0,
                  "y": 1498.0
                }
              ]
            },
            {
              "startLaneIndex": 1,
              "endLaneIndex": 1,
              "points": [
                {
                  "x": -11.0,
                  "y": 1494.0
                },
                {
                  "x": -9.592,
                  "y": 1494.0
                },
                {
                  "x": -7.656,
                  "y": 1494.0
                },
                {
                  "x": -5.324,
                  "y": 1494.0
                },
                {
                  "x": -2.7279999999999998,
                  "y": 1494.0
                },
                {
                  "x": 0.0,
                  "y": 1494.0
                },
                {
                  "x": 2.7279999999999998,
                  "y": 1494.0
                },
                {
                  "x": 5.323999999999999,
                  "y": 1494.0
                },
                {
                  "x": 7.655999999999999,
                  "y": 1494.0
                },
                {
                  "x": 9.592,
                  "y": 1494.0
                },
                {
                  "x": 11.0,
                  "y": 1494.0
                }
              ]
            },
            {
              "startLaneIndex": 1,
              "endLaneIndex": 2,
              "points": [
                {
                  "x": -11.0,
                  "y": 1494.0
                },
                {
                  "x": -9.592,
                  "y": 1493.888
                },
                {
                  "x": -7.656,
                  "y": 1493.584
                },
                {
                  "x": -5.324,
                  "y": 1493.136
                },
                {
                  "x": -2.7279999999999998,
                  "y": 1492.592
                },
                {
                  "x": 0.0,
                  "y": 1492.0
                },
                {
                  "x": 2.7279999999999998,
                  "y": 1491.408
                },
                {
                  "x": 5.323999999999999,
                  "y": 1490.864
                },
                {
                  "x": 7.655999999999999,
                  "y": 1490.416
                },
                {
                  "x": 9.592,
                  "y": 1490.112
                },
                {
                  "x": 11.0,
                  "y": 1490.0
                }
              ]
            }
          ]
        },
        {
          "type": "turn_left",
          "startRoad": "road_0_6_0",
          "endRoad": "road_1_6_1",
          "direction": 0,
          "laneLinks": [
            {
              "startLaneIndex": 0,
              "endLaneIndex": 0,
              "points": [
                {
                  "x": -11.0,
                  "y": 1498.0
                },
                {
                  "x": -9.745,
                  "y": 1498.2649999999999
                },
                {
                  "x": -8.24,
                  "y": 1499.0
                },
                {
                  "x": -6.575,
                  "y": 1500.115
                },
                {
                  "x": -4.84,
                  "y": 1501.52
                },
                {
                  "x": -3.125,
                  "y": 1503.125
                },
                {
                  "x": -1.52,
                  "y": 1504.84
                },
                {
                  "x": -0.115000000000001,
                  "y": 1506.575
                },
                {
                  "x": 0.999999999999999,
                  "y": 1508.24
                },
                {
                  "x": 1.735,
                  "y": 1509.745
                },
                {
                  "x": 2.0,
                  "y": 1511.0
                }
              ]
            },
            {
              "startLaneIndex": 0,
              "endLaneIndex": 1,
              "points": [
                {
                  "x": -11.0,
                  "y": 1498.0
                },
                {
                  "x": -9.633,
                  "y": 1498.2649999999999
                },
                {
                  "x": -7.824,
                  "y": 1499.0
                },
                {
                  "x": -5.711,
                  "y": 1500.115
                },
                {
                  "x": -3.432,
                  "y": 1501.52
                },
                {
                  "x": -1.125,
                  "y": 1503.125
                },
                {
                  "x": 1.072,
                  "y": 1504.84
                },
                {
                  "x": 3.020999999999999,
                  "y": 1506.575
                },
                {
                  "x": 4.583999999999999,
                  "y": 1508.24
                },
                {
                  "x": 5.623,
                  "y": 1509.745
                },
                {
                  "x": 6.0,
                  "y": 1511.0
                }
              ]
            },
            {
              "startLaneIndex": 0,
              "endLaneIndex": 2,
              "points": [
                {
                  "x": -11.0,
                  "y": 1498.0
                },
                {
                  "x": -9.521,
                  "y": 1498.2649999999999
                },
                {
                  "x": -7.408,
                  "y": 1499.0
                },
                {
                  "x": -4.8469999999999995,
                  "y": 1500.115
                },
                {
                  "x": -2.024,
                  "y": 1501.52
                },
                {
                  "x": 0.875,
                  "y": 1503.125
                },
                {
                  "x": 3.664,
                  "y": 1504.84
                },
                {
                  "x": 6.156999999999999,
                  "y": 1506.575
                },
                {
                  "x": 8.168,
                  "y": 1508.24
                },
                {
                  "x": 9.511,
                  "y": 1509.745
                },
                {
                  "x": 10.0,
                  "y": 1511.0
                }
              ]
            }
          ]
        },
        {
          "type": "turn_right",
          "startRoad": "road_0_6_0",
          "endRoad": "road_1_6_3",
          "direction": 0,
          "laneLinks": [
            {
              "startLaneIndex": 2,
              "endLaneIndex": 0,
              "points": [
                {
                  "x": -11.0,
                  "y": 1490.0
                },
                {
                  "x": -9.857,
                  "y": 1490.071
                },
                {
                  "x": -8.656,
                  "y": 1490.248
                },
                {
                  "x": -7.439,
                  "y": 1490.477
                },
                {
                  "x": -6.248,
                  "y": 1490.704
                },
                {
                  "x": -5.125,
                  "y": 1490.875
                },
                {
                  "x": -4.112,
                  "y": 1490.936
                },
                {
                  "x": -3.251000000000001,
                  "y": 1490.833
                },
                {
                  "x": -2.584000000000001,
                  "y": 1490.512
                },
                {
                  "x": -2.153,
                  "y": 1489.919
                },
                {
                  "x": -2.0,
                  "y": 1489.0
                }
              ]
            },
            {
              "startLaneIndex": 2,
              "endLaneIndex": 1,
              "points": [
                {
                  "x": -11.0,
                  "y": 1490.0
                },
                {
                  "x": -9.969,
                  "y": 1490.071
                },
                {
                  "x": -9.072,
                  "y": 1490.248
                },
                {
                  "x": -8.303,
                  "y": 1490.477
                },
                {
                  "x": -7.656,
                  "y": 1490.704
                },
                {
                  "x": -7.125,
                  "y": 1490.875
                },
                {
                  "x": -6.704,
                  "y": 1490.936
                },
                {
                  "x": -6.387000000000001,
                  "y": 1490.833
                },
                {
                  "x": -6.168000000000001,
                  "y": 1490.512
                },
                {
                  "x": -6.0409999999999995,
                  "y": 1489.919
                },
                {
                  "x": -6.0,
                  "y": 1489.0
                }
              ]
            },
            {
              "startLaneIndex": 2,
              "endLaneIndex": 2,
              "points": [
                {
                  "x": -11.0,
                  "y": 1490.0
                },
                {
                  "x": -10.081,
                  "y": 1490.071
                },
                {
                  "x": -9.488,
                  "y": 1490.248
                },
                {
                  "x": -9.167,
                  "y": 1490.477
                },
                {
                  "x": -9.064,
                  "y": 1490.704
                },
                {
                  "x": -9.125,
                  "y": 1490.875
                },
                {
                  "x": -9.296,
                  "y": 1490.936
                },
                {
                  "x": -9.523000000000001,
                  "y": 1490.833
                },
                {
                  "x": -9.752,
                  "y": 1490.512
                },
                {
                  "x": -9.929,
                  "y": 1489.919
                },
                {
                  "x": -10.0,
                  "y": 1489.0
                }
              ]
            }
          ]
        },
        {
          "type": "turn_right",
          "startRoad": "road_1_5_1",
          "endRoad": "road_1_6_0",
          "direction": 1,
          "laneLinks": [
            {
              "startLaneIndex": 2,
              "endLaneIndex": 0,
              "points": [
                {
                  "x": 10.0,
                  "y": 1489.0
                },
                {
                  "x": 9.929,
                  "y": 1490.143
                },
                {
                  "x": 9.752,
                  "y": 1491.344
                },
                {
                  "x": 9.523,
                  "y": 1492.561
                },
                {
                  "x": 9.296,
                  "y": 1493.752
                },
                {
                  "x": 9.125,
                  "y": 1494.875
                },
                {
                  "x": 9.064,
                  "y": 1495.888
                },
                {
                  "x": 9.167,
                  "y": 1496.749
                },
                {
                  "x": 9.488,
                  "y": 1497.416
                },
                {
                  "x": 10.081,
                  "y": 1497.847
                },
                {
                  "x": 11.0,
                  "y": 1498.0
                }
              ]
            },
            {
              "startLaneIndex": 2,
              "endLaneIndex": 1,
              "points": [
                {
                  "x": 10.0,
                  "y": 1489.0
                },
                {
                  "x": 9.929,
                  "y": 1490.031
                },
                {
                  "x": 9.752,
                  "y": 1490.9279999999999
                },
                {
                  "x": 9.523,
                  "y": 1491.697
                },
                {
                  "x": 9.296,
                  "y": 1492.344
                },
                {
                  "x": 9.125,
                  "y": 1492.875
                },
                {
                  "x": 9.064,
                  "y": 1493.296
                },
                {
                  "x": 9.167,
                  "y": 1493.613
                },
                {
                  "x": 9.488,
                  "y": 1493.8319999999999
                },
                {
                  "x": 10.081,
                  "y": 1493.959
                },
                {
                  "x": 11.0,
                  "y": 1494.0
                }
              ]
            },
            {
              "startLaneIndex": 2,
              "endLaneIndex": 2,
              "points": [
                {
                  "x": 10.0,
                  "y": 1489.0
                },
                {
                  "x": 9.929,
                  "y": 1489.919
                },
                {
                  "x": 9.752,
                  "y": 1490.512
                },
                {
                  "x": 9.523,
                  "y": 1490.833
                },
                {
                  "x": 9.296,
                  "y": 1490.936
                },
                {
                  "x": 9.125,
                  "y": 1490.875
                },
                {
                  "x": 9.064,
                  "y": 1490.704
                },
                {
                  "x": 9.167,
                  "y": 1490.477
                },
                {
                  "x": 9.488,
                  "y": 1490.248
                },
                {
                  "x": 10.081,
                  "y": 1490.071
                },
                {
                  "x": 11.0,
                  "y": 1490.0
                }
              ]
            }
          ]
        },
        {
          "type": "go_straight",
          "startRoad": "road_1_5_1",
          "endRoad": "road_1_6_1",
          "direction": 1,
          "laneLinks": [
            {
              "startLaneIndex": 1,
              "endLaneIndex": 0,
              "points": [
                {
                  "x": 6.0,
                  "y": 1489.0
                },
                {
                  "x": 5.888,
                  "y": 1490.408
                },
                {
                  "x": 5.584,
                  "y": 1492.344
                },
                {
                  "x": 5.136,
                  "y": 1494.676
                },
                {
                  "x": 4.592,
                  "y": 1497.272
                },
                {
                  "x": 4.0,
                  "y": 1500.0
                },
                {
                  "x": 3.408,
                  "y": 1502.728
                },
                {
                  "x": 2.864,
                  "y": 1505.324
                },
                {
                  "x": 2.415999999999999,
                  "y": 1507.656
                },
                {
                  "x": 2.112,
                  "y": 1509.592
                },
                {
                  "x": 2.0,
                  "y": 1511.0
                }
              ]
            },
            {
              "startLaneIndex": 1,
              "endLaneIndex": 1,
              "points": [
                {
                  "x": 6.0,
                  "y": 1489.0
                },
                {
                  "x": 6.0,
                  "y": 1490.408
                },
                {
                  "x": 6.0,
                  "y": 1492.344
                },
                {
                  "x": 6.0,
                  "y": 1494.676
                },
                {
                  "x": 6.0,
                  "y": 1497.272
                },
                {
                  "x": 6.0,
                  "y": 1500.0
                },
                {
                  "x": 6.0,
                  "y": 1502.728
                },
                {
                  "x": 6.0,
                  "y": 1505.324
                },
                {
                  "x": 5.999999999999999,
                  "y": 1507.656
                },
                {
                  "x": 6.0,
                  "y": 1509.592
                },
                {
                  "x": 6.0,
                  "y": 1511.0
                }
              ]
            },
            {
              "startLaneIndex": 1,
              "endLaneIndex": 2,
              "points": [
                {
                  "x": 6.0,
                  "y": 1489.0
                },
                {
                  "x": 6.112,
                  "y": 1490.408
                },
                {
                  "x": 6.416,
                  "y": 1492.344
                },
                {
                  "x": 6.864,
                  "y": 1494.676
                },
                {
                  "x": 7.408,
                  "y": 1497.272
                },
                {
                  "x": 8.0,
                  "y": 1500.0
                },
                {
                  "x": 8.592,
                  "y": 1502.728
                },
                {
                  "x": 9.136,
                  "y": 1505.324
                },
                {
                  "x": 9.584,
                  "y": 1507.656
                },
                {
                  "x": 9.888,
                  "y": 1509.592
                },
                {
                  "x": 10.0,
                  "y": 1511.0
                }
              ]
            }
          ]
        },
        {
          "type": "turn_left",
          "startRoad": "road_1_5_1",
          "endRoad": "road_1_6_2",
          "direction": 1,
          "laneLinks": [
            {
              "startLaneIndex": 0,
              "endLaneIndex": 0,
              "points": [
                {
                  "x": 2.0,
                  "y": 1489.0
                },
                {
                  "x": 1.7349999999999999,
                  "y": 1490.255
                },
                {
                  "x": 1.0,
                  "y": 1491.76
                },
                {
                  "x": -0.115,
                  "y": 1493.425
                },
                {
                  "x": -1.52,
                  "y": 1495.16
                },
                {
                  "x": -3.125,
                  "y": 1496.875
                },
                {
                  "x": -4.84,
                  "y": 1498.48
                },
                {
                  "x": -6.575,
                  "y": 1499.885
                },
                {
                  "x": -8.24,
                  "y": 1501.0
                },
                {
                  "x": -9.745,
                  "y": 1501.735
                },
                {
                  "x": -11.0,
                  "y": 1502.0
                }
              ]
            },
            {
              "startLaneIndex": 0,
              "endLaneIndex": 1,
              "points": [
                {
                  "x": 2.0,
                  "y": 1489.0
                },
                {
                  "x": 1.7349999999999999,
                  "y": 1490.367
                },
                {
                  "x": 1.0,
                  "y": 1492.176
                },
                {
                  "x": -0.115,
                  "y": 1494.289
                },
                {
                  "x": -1.52,
                  "y": 1496.568
                },
                {
                  "x": -3.125,
                  "y": 1498.875
                },
                {
                  "x": -4.84,
                  "y": 1501.072
                },
                {
                  "x": -6.575,
                  "y": 1503.021
                },
                {
                  "x": -8.24,
                  "y": 1504.584
                },
                {
                  "x": -9.745,
                  "y": 1505.623
                },
                {
                  "x": -11.0,
                  "y": 1506.0
                }
              ]
            },
            {
              "startLaneIndex": 0,
              "endLaneIndex": 2,
              "points": [
                {
                  "x": 2.0,
                  "y": 1489.0
                },
                {
                  "x": 1.7349999999999999,
                  "y": 1490.479
                },
                {
                  "x": 1.0,
                  "y": 1492.592
                },
                {
                  "x": -0.115,
                  "y": 1495.153
                },
                {
                  "x": -1.52,
                  "y": 1497.976
                },
                {
                  "x": -3.125,
                  "y": 1500.875
                },
                {
                  "x": -4.84,
                  "y": 1503.664
                },
                {
                  "x": -6.575,
                  "y": 1506.157
                },
                {
                  "x": -8.24,
                  "y": 1508.168
                },
                {
                  "x": -9.745,
                  "y": 1509.511
                },
                {
                  "x": -11.0,
                  "y": 1510.0
                }
              ]
            }
          ]
        },
        {
          "type": "turn_right",
          "startRoad": "road_2_6_2",
          "endRoad": "road_1_6_1",
          "direction": 2,
          "laneLinks": [
            {
              "startLaneIndex": 2,
              "endLaneIndex": 0,
              "points": [
                {
                  "x": 11.0,
                  "y": 1510.0
                },
                {
                  "x": 9.857,
                  "y": 1509.929
                },
                {
                  "x": 8.656,
                  "y": 1509.752
                },
                {
                  "x": 7.439,
                  "y": 1509.523
                },
                {
                  "x": 6.248,
                  "y": 1509.296
                },
                {
                  "x": 5.125,
                  "y": 1509.125
                },
                {
                  "x": 4.112,
                  "y": 1509.064
                },
                {
                  "x": 3.251000000000001,
                  "y": 1509.167
                },
                {
                  "x": 2.584000000000001,
                  "y": 1509.488
                },
                {
                  "x": 2.153,
                  "y": 1510.081
                },
                {
                  "x": 2.0,
                  "y": 1511.0
                }
              ]
            },
            {
              "startLaneIndex": 2,
              "endLaneIndex": 1,
              "points": [
                {
                  "x": 11.0,
                  "y": 1510.0
                },
                {
                  "x": 9.969,
                  "y": 1509.929
                },
                {
                  "x": 9.072,
                  "y": 1509.752
                },
                {
                  "x": 8.303,
                  "y": 1509.523
                },
                {
                  "x": 7.656,
                  "y": 1509.296
                },
                {
                  "x": 7.125,
                  "y": 1509.125
                },
                {
                  "x": 6.704,
                  "y": 1509.064
                },
                {
                  "x": 6.387000000000001,
                  "y": 1509.167
                },
                {
                  "x": 6.168000000000001,
                  "y": 1509.488
                },
                {
                  "x": 6.0409999999999995,
                  "y": 1510.081
                },
                {
                  "x": 6.0,
                  "y": 1511.0
                }
              ]
            },
            {
              "startLaneIndex": 2,
              "endLaneIndex": 2,
              "points": [
                {
                  "x": 11.0,
                  "y": 1510.0
                },
                {
                  "x": 10.081,
                  "y": 1509.929
                },
                {
                  "x": 9.488,
                  "y": 1509.752
                },
                {
                  "x": 9.167,
                  "y": 1509.523
                },
                {
                  "x": 9.064,
                  "y": 1509.296
                },
                {
                  "x": 9.125,
                  "y": 1509.125
                },
                {
                  "x": 9.296,
                  "y": 1509.064
                },
                {
                  "x": 9.523000000000001,
                  "y": 1509.167
                },
                {
                  "x": 9.752,
                  "y": 1509.488
                },
                {
                  "x": 9.929,
                  "y": 1510.081
                },
                {
                  "x": 10.0,
                  "y": 1511.0
                }
              ]
            }
          ]
        },
        {
          "type": "go_straight",
          "startRoad": "road_2_6_2",
          "endRoad": "road_1_6_2",
          "direction": 2,
          "laneLinks": [
            {
              "startLaneIndex": 1,
              "endLaneIndex": 0,
              "points": [
                {
                  "x": 11.0,
                  "y": 1506.0
                },
                {
                  "x": 9.592,
                  "y": 1505.888
                },
                {
                  "x": 7.656,
                  "y": 1505.584
                },
                {
                  "x": 5.324,
                  "y": 1505.136
                },
                {
                  "x": 2.7279999999999998,
                  "y": 1504.592
                },
                {
                  "x": 0.0,
                  "y": 1504.0
                },
                {
                  "x": -2.7279999999999998,
                  "y": 1503.408
                },
                {
                  "x": -5.323999999999999,
                  "y": 1502.864
                },
                {
                  "x": -7.655999999999999,
                  "y": 1502.416
                },
                {
                  "x": -9.592,
                  "y": 1502.112
                },
                {
                  "x": -11.0,
                  "y": 1502.0
                }
              ]
            },
            {
              "startLaneIndex": 1,
              "endLaneIndex": 1,
              "points": [
                {
                  "x": 11.0,
                  "y": 1506.0
                },
                {
                  "x": 9.592,
                  "y": 1506.0
                },
                {
                  "x": 7.656,
                  "y": 1506.0
                },
                {
                  "x": 5.324,
                  "y": 1506.0
                },
                {
                  "x": 2.7279999999999998,
                  "y": 1506.0
                },
                {
                  "x": 0.0,
                  "y": 1506.0
                },
                {
                  "x": -2.7279999999999998,
                  "y": 1506.0
                },
                {
                  "x": -5.323999999999999,
                  "y": 1506.0
                },
                {
                  "x": -7.655999999999999,
                  "y": 1506.0
                },
                {
                  "x": -9.592,
                  "y": 1506.0
                },
                {
                  "x": -11.0,
                  "y": 1506.0
                }
              ]
            },
            {
              "startLaneIndex": 1,
              "endLaneIndex": 2,
              "points": [
                {
                  "x": 11.0,
                  "y": 1506.0
                },
                {
                  "x": 9.592,
                  "y": 1506.112
                },
                {
                  "x": 7.656,
                  "y": 1506.416
                },
                {
                  "x": 5.324,
                  "y": 1506.864
                },
                {
                  "x": 2.7279999999999998,
                  "y": 1507.408
                },
                {
                  "x": 0.0,
                  "y": 1508.0
                },
                {
                  "x": -2.7279999999999998,
                  "y": 1508.592
                },
                {
                  "x": -5.323999999999999,
                  "y": 1509.136
                },
                {
                  "x": -7.655999999999999,
                  "y": 1509.584
                },
                {
                  "x": -9.592,
                  "y": 1509.888
                },
                {
                  "x": -11.0,
                  "y": 1510.0
                }
              ]
            }
          ]
        },
        {
          "type": "turn_left",
          "startRoad": "road_2_6_2",
          "endRoad": "road_1_6_3",
          "direction": 2,
          "laneLinks": [
            {
              "startLaneIndex": 0,
              "endLaneIndex": 0,
              "points": [
                {
                  "x": 11.0,
                  "y": 1502.0
                },
                {
                  "x": 9.745,
                  "y": 1501.735
                },
                {
                  "x": 8.24,
                  "y": 1501.0
                },
                {
                  "x": 6.575,
                  "y": 1499.885
                },
                {
                  "x": 4.84,
                  "y": 1498.48
                },
                {
                  "x": 3.125,
                  "y": 1496.875
                },
                {
                  "x": 1.52,
                  "y": 1495.16
                },
                {
                  "x": 0.115000000000001,
                  "y": 1493.425
                },
                {
                  "x": -0.999999999999999,
                  "y": 1491.76
                },
                {
                  "x": -1.735,
                  "y": 1490.255
                },
                {
                  "x": -2.0,
                  "y": 1489.0
                }
              ]
            },
            {
              "startLaneIndex": 0,
              "endLaneIndex": 1,
              "points": [
                {
                  "x": 11.0,
                  "y": 1502.0
                },
                {
                  "x": 9.633,
                  "y": 1501.735
                },
                {
                  "x": 7.824,
                  "y": 1501.0
                },
                {
                  "x": 5.711,
                  "y": 1499.885
                },
                {
                  "x": 3.432,
                  "y": 1498.48
                },
                {
                  "x": 1.125,
                  "y": 1496.875
                },
                {
                  "x": -1.072,
                  "y": 1495.16
                },
                {
                  "x": -3.020999999999999,
                  "y": 1493.425
                },
                {
                  "x": -4.583999999999999,
                  "y": 1491.76
                },
                {
                  "x": -5.623,
                  "y": 1490.255
                },
                {
                  "x": -6.0,
                  "y": 1489.0
                }
              ]
            },
            {
              "startLaneIndex": 0,
              "endLaneIndex": 2,
              "points": [
                {
                  "x": 11.0,
                  "y": 1502.0
                },
                {
                  "x": 9.521,
                  "y": 1501.735
                },
                {
                  "x": 7.408,
                  "y": 1501.0
                },
                {
                  "x": 4.8469999999999995,
                  "y": 1499.885
                },
                {
                  "x": 2.024,
                  "y": 1498.48
                },
                {
                  "x": -0.875,
                  "y": 1496.875
                },
                {
                  "x": -3.664,
                  "y": 1495.16
                },
                {
                  "x": -6.156999999999999,
                  "y": 1493.425
                },
                {
                  "x": -8.168,
                  "y": 1491.76
                },
                {
                  "x": -9.511,
                  "y": 1490.255
                },
                {
                  "x": -10.0,
                  "y": 1489.0
                }
              ]
            }
          ]
        },
        {
          "type": "turn_left",
          "startRoad": "road_1_7_3",
          "endRoad": "road_1_6_0",
          "direction": 3,
          "laneLinks": [
            {
              "startLaneIndex": 0,
              "endLaneIndex": 0,
              "points": [
                {
                  "x": -2.0,
                  "y": 1511.0
                },
                {
                  "x": -1.7349999999999999,
                  "y": 1509.745
                },
                {
                  "x": -1.0,
                  "y": 1508.24
                },
                {
                  "x": 0.115,
                  "y": 1506.575
                },
                {
                  "x": 1.52,
                  "y": 1504.84
                },
                {
                  "x": 3.125,
                  "y": 1503.125
                },
                {
                  "x": 4.84,
                  "y": 1501.52
                },
                {
                  "x": 6.575,
                  "y": 1500.115
                },
                {
                  "x": 8.24,
                  "y": 1499.0
                },
                {
                  "x": 9.745,
                  "y": 1498.2649999999999
                },
                {
                  "x": 11.0,
                  "y": 1498.0
                }
              ]
            },
            {
              "startLaneIndex": 0,
              "endLaneIndex": 1,
              "points": [
                {
                  "x": -2.0,
                  "y": 1511.0
                },
                {
                  "x": -1.7349999999999999,
                  "y": 1509.633
                },
                {
                  "x": -1.0,
                  "y": 1507.824
                },
                {
                  "x": 0.115,
                  "y": 1505.711
                },
                {
                  "x": 1.52,
                  "y": 1503.432
                },
                {
                  "x": 3.125,
                  "y": 1501.125
                },
                {
                  "x": 4.84,
                  "y": 1498.9279999999999
                },
                {
                  "x": 6.575,
                  "y": 1496.979
                },
                {
                  "x": 8.24,
                  "y": 1495.416
                },
                {
                  "x": 9.745,
                  "y": 1494.377
                },
                {
                  "x": 11.0,
                  "y": 1494.0
                }
              ]
            },
            {
              "startLaneIndex": 0,
              "endLaneIndex": 2,
              "points": [
                {
                  "x": -2.0,
                  "y": 1511.0
                },
                {
                  "x": -1.7349999999999999,
                  "y": 1509.521
                },
                {
                  "x": -1.0,
                  "y": 1507.408
                },
                {
                  "x": 0.115,
                  "y": 1504.847
                },
                {
                  "x": 1.52,
                  "y": 1502.024
                },
                {
                  "x": 3.125,
                  "y": 1499.125
                },
                {
                  "x": 4.84,
                  "y": 1496.336
                },
                {
                  "x": 6.575,
                  "y": 1493.843
                },
                {
                  "x": 8.24,
                  "y": 1491.8319999999999
                },
                {
                  "x": 9.745,
                  "y": 1490.489
                },
                {
                  "x": 11.0,
                  "y": 1490.0
                }
              ]
            }
          ]
        },
        {
          "type": "turn_right",
          "startRoad": "road_1_7_3",
          "endRoad": "road_1_6_2",
          "direction": 3,
          "laneLinks": [
            {
              "startLaneIndex": 2,
              "endLaneIndex": 0,
              "points": [
                {
                  "x": -10.0,
                  "y": 1511.0
                },
                {
                  "x": -9.929,
                  "y": 1509.857
                },
                {
                  "x": -9.752,
                  "y": 1508.656
                },
                {
                  "x": -9.523,
                  "y": 1507.439
                },
                {
                  "x": -9.296,
                  "y": 1506.248
                },
                {
                  "x": -9.125,
                  "y": 1505.125
                },
                {
                  "x": -9.064,
                  "y": 1504.112
                },
                {
                  "x": -9.167,
                  "y": 1503.251
                },
                {
                  "x": -9.488,
                  "y": 1502.584
                },
                {
                  "x": -10.081,
                  "y": 1502.153
                },
                {
                  "x": -11.0,
                  "y": 1502.0
                }
              ]
            },
            {
              "startLaneIndex": 2,
              "endLaneIndex": 1,
              "points": [
                {
                  "x": -10.0,
                  "y": 1511.0
                },
                {
                  "x": -9.929,
                  "y": 1509.969
                },
                {
                  "x": -9.752,
                  "y": 1509.072
                },
                {
                  "x": -9.523,
                  "y": 1508.3029999999999
                },
                {
                  "x": -9.296,
                  "y": 1507.656
                },
                {
                  "x": -9.125,
                  "y": 1507.125
                },
                {
                  "x": -9.064,
                  "y": 1506.704
                },
                {
                  "x": -9.167,
                  "y": 1506.387
                },
                {
                  "x": -9.488,
                  "y": 1506.168
                },
                {
                  "x": -10.081,
                  "y": 1506.041
                },
                {
                  "x": -11.0,
                  "y": 1506.0
                }
              ]
            },
            {
              "startLaneIndex": 2,
              "endLaneIndex": 2,
              "points": [
                {
                  "x": -10.0,
                  "y": 1511.0
                },
                {
                  "x": -9.929,
                  "y": 1510.081
                },
                {
                  "x": -9.752,
                  "y": 1509.488
                },
                {
                  "x": -9.523,
                  "y": 1509.167
                },
                {
                  "x": -9.296,
                  "y": 1509.064
                },
                {
                  "x": -9.125,
                  "y": 1509.125
                },
                {
                  "x": -9.064,
                  "y": 1509.296
                },
                {
                  "x": -9.167,
                  "y": 1509.523
                },
                {
                  "x": -9.488,
                  "y": 1509.752
                },
                {
                  "x": -10.081,
                  "y": 1509.929
                },
                {
                  "x": -11.0,
                  "y": 1510.0
                }
              ]
            }
          ]
        },
        {
          "type": "go_straight",
          "startRoad": "road_1_7_3",
          "endRoad": "road_1_6_3",
          "direction": 3,
          "laneLinks": [
            {
              "startLaneIndex": 1,
              "endLaneIndex": 0,
              "points": [
                {
                  "x": -6.0,
                  "y": 1511.0
                },
                {
                  "x": -5.888,
                  "y": 1509.592
                },
                {
                  "x": -5.584,
                  "y": 1507.656
                },
                {
                  "x": -5.136,
                  "y": 1505.324
                },
                {
                  "x": -4.592,
                  "y": 1502.728
                },
                {
                  "x": -4.0,
                  "y": 1500.0
                },
                {
                  "x": -3.408,
                  "y": 1497.272
                },
                {
                  "x": -2.864,
                  "y": 1494.676
                },
                {
                  "x": -2.415999999999999,
                  "y": 1492.344
                },
                {
                  "x": -2.112,
                  "y": 1490.408
                },
                {
                  "x": -2.0,
                  "y": 1489.0
                }
              ]
            },
            {
              "startLaneIndex": 1,
              "endLaneIndex": 1,
              "points": [
                {
                  "x": -6.0,
                  "y": 1511.0
                },
                {
                  "x": -6.0,
                  "y": 1509.592
                },
                {
                  "x": -6.0,
                  "y": 1507.656
                },
                {
                  "x": -6.0,
                  "y": 1505.324
                },
                {
                  "x": -6.0,
                  "y": 1502.728
                },
                {
                  "x": -6.0,
                  "y": 1500.0
                },
                {
                  "x": -6.0,
                  "y": 1497.272
                },
                {
                  "x": -6.0,
                  "y": 1494.676
                },
                {
                  "x": -5.999999999999999,
                  "y": 1492.344
                },
                {
                  "x": -6.0,
                  "y": 1490.408
                },
                {
                  "x": -6.0,
                  "y": 1489.0
                }
              ]
            },
            {
              "startLaneIndex": 1,
              "endLaneIndex": 2,
              "points": [
                {
                  "x": -6.0,
                  "y": 1511.0
                },
                {
                  "x": -6.112,
                  "y": 1509.592
                },
                {
                  "x": -6.416,
                  "y": 1507.656
                },
                {
                  "x": -6.864,
                  "y": 1505.324
                },
                {
                  "x": -7.408,
                  "y": 1502.728
                },
                {
                  "x": -8.0,
                  "y": 1500.0
                },
                {
                  "x": -8.592,
                  "y": 1497.272
                },
                {
                  "x": -9.136,
                  "y": 1494.676
                },
                {
                  "x": -9.584,
                  "y": 1492.344
                },
                {
                  "x": -9.888,
                  "y": 1490.408
                },
                {
                  "x": -10.0,
                  "y": 1489.0
                }
              ]
            }
          ]
        }
      ],
      "trafficLight": {
        "roadLinkIndices": [
          0,
          1,
          2,
          3,
          4,
          5,
          6,
          7,
          8,
          9,
          10,
          11
        ],
        "lightphases": [
          {
            "time": 5,
            "availableRoadLinks": [
              10,
              2,
              3,
              6
            ]
          },
          {
            "time": 30,
            "availableRoadLinks": [
              0,
              2,
              3,
              6,
              7,
              10
            ]
          },
          {
            "time": 30,
            "availableRoadLinks": [
              2,
              3,
              4,
              6,
              10,
              11
            ]
          },
          {
            "time": 30,
            "availableRoadLinks": [
              1,
              2,
              3,
              6,
              8,
              10
            ]
          },
          {
            "time": 30,
            "availableRoadLinks": [
              2,
              3,
              5,
              6,
              9,
              10
            ]
          },
          {
            "time": 30,
            "availableRoadLinks": [
              0,
              1,
              2,
              3,
              6,
              10
            ]
          },
          {
            "time": 30,
            "availableRoadLinks": [
              2,
              3,
              6,
              7,
              8,
              10
            ]
          },
          {
            "time": 30,
            "availableRoadLinks": [
              2,
              3,
              4,
              5,
              6,
              10
            ]
          },
          {
            "time": 30,
            "availableRoadLinks": [
              2,
              3,
              6,
              9,
              10,
              11
            ]
          }
        ]
      },
      "virtual": false
    },
    {
      "id": "intersection_1_7",
      "point": {
        "x": 0,
        "y": 1800
      },
      "width": 0,
      "roads": [
        "road_1_6_1",
        "road_1_7_3"
      ],
      "roadLinks": [],
      "trafficLight": {
        "roadLinkIndices": [],
        "lightphases": [
          {
            "time": 5,
            "availableRoadLinks": []
          },
          {
            "time": 30,
            "availableRoadLinks": []
          },
          {
            "time": 30,
            "availableRoadLinks": []
          },
          {
            "time": 30,
            "availableRoadLinks": []
          },
          {
            "time": 30,
            "availableRoadLinks": []
          },
          {
            "time": 30,
            "availableRoadLinks": []
          },
          {
            "time": 30,
            "availableRoadLinks": []
          },
          {
            "time": 30,
            "availableRoadLinks": []
          },
          {
            "time": 30,
            "availableRoadLinks": []
          }
        ]
      },
      "virtual": true
    },
    {
      "id": "intersection_2_0",
      "point": {
        "x": 300,
        "y": -300
      },
      "width": 0,
      "roads": [
        "road_2_1_3",
        "road_2_0_1"
      ],
      "roadLinks": [],
      "trafficLight": {
        "roadLinkIndices": [],
        "lightphases": [
          {
            "time": 5,
            "availableRoadLinks": []
          },
          {
            "time": 30,
            "availableRoadLinks": []
          },
          {
            "time": 30,
            "availableRoadLinks": []
          },
          {
            "time": 30,
            "availableRoadLinks": []
          },
          {
            "time": 30,
            "availableRoadLinks": []
          },
          {
            "time": 30,
            "availableRoadLinks": []
          },
          {
            "time": 30,
            "availableRoadLinks": []
          },
          {
            "time": 30,
            "availableRoadLinks": []
          },
          {
            "time": 30,
            "availableRoadLinks": []
          }
        ]
      },
      "virtual": true
    },
    {
      "id": "intersection_2_1",
      "point": {
        "x": 300,
        "y": 0
      },
      "width": 11,
      "roads": [
        "road_1_1_0",
        "road_2_0_1",
        "road_3_1_2",
        "road_2_2_3",
        "road_2_1_0",
        "road_2_1_1",
        "road_2_1_2",
        "road_2_1_3"
      ],
      "roadLinks": [
        {
          "type": "go_straight",
          "startRoad": "road_1_1_0",
          "endRoad": "road_2_1_0",
          "direction": 0,
          "laneLinks": [
            {
              "startLaneIndex": 1,
              "endLaneIndex": 0,
              "points": [
                {
                  "x": 289.0,
                  "y": -6.0
                },
                {
                  "x": 290.408,
                  "y": -5.888
                },
                {
                  "x": 292.344,
                  "y": -5.584
                },
                {
                  "x": 294.676,
                  "y": -5.136
                },
                {
                  "x": 297.272,
                  "y": -4.592
                },
                {
                  "x": 300.0,
                  "y": -4.0
                },
                {
                  "x": 302.728,
                  "y": -3.408
                },
                {
                  "x": 305.324,
                  "y": -2.864
                },
                {
                  "x": 307.656,
                  "y": -2.415999999999999
                },
                {
                  "x": 309.592,
                  "y": -2.112
                },
                {
                  "x": 311.0,
                  "y": -2.0
                }
              ]
            },
            {
              "startLaneIndex": 1,
              "endLaneIndex": 1,
              "points": [
                {
                  "x": 289.0,
                  "y": -6.0
                },
                {
                  "x": 290.408,
                  "y": -6.0
                },
                {
                  "x": 292.344,
                  "y": -6.0
                },
                {
                  "x": 294.676,
                  "y": -6.0
                },
                {
                  "x": 297.272,
                  "y": -6.0
                },
                {
                  "x": 300.0,
                  "y": -6.0
                },
                {
                  "x": 302.728,
                  "y": -6.0
                },
                {
                  "x": 305.324,
                  "y": -6.0
                },
                {
                  "x": 307.656,
                  "y": -5.999999999999999
                },
                {
                  "x": 309.592,
                  "y": -6.0
                },
                {
                  "x": 311.0,
                  "y": -6.0
                }
              ]
            },
            {
              "startLaneIndex": 1,
              "endLaneIndex": 2,
              "points": [
                {
                  "x": 289.0,
                  "y": -6.0
                },
                {
                  "x": 290.408,
                  "y": -6.112
                },
                {
                  "x": 292.344,
                  "y": -6.416
                },
                {
                  "x": 294.676,
                  "y": -6.864
                },
                {
                  "x": 297.272,
                  "y": -7.408
                },
                {
                  "x": 300.0,
                  "y": -8.0
                },
                {
                  "x": 302.728,
                  "y": -8.592
                },
                {
                  "x": 305.324,
                  "y": -9.136
                },
                {
                  "x": 307.656,
                  "y": -9.584
                },
                {
                  "x": 309.592,
                  "y": -9.888
                },
                {
                  "x": 311.0,
                  "y": -10.0
                }
              ]
            }
          ]
        },
        {
          "type": "turn_left",
          "startRoad": "road_1_1_0",
          "endRoad": "road_2_1_1",
          "direction": 0,
          "laneLinks": [
            {
              "startLaneIndex": 0,
              "endLaneIndex": 0,
              "points": [
                {
                  "x": 289.0,
                  "y": -2.0
                },
                {
                  "x": 290.255,
                  "y": -1.7349999999999999
                },
                {
                  "x": 291.76,
                  "y": -1.0
                },
                {
                  "x": 293.425,
                  "y": 0.115
                },
                {
                  "x": 295.15999999999997,
                  "y": 1.52
                },
                {
                  "x": 296.875,
                  "y": 3.125
                },
                {
                  "x": 298.48,
                  "y": 4.84
                },
                {
                  "x": 299.885,
                  "y": 6.575
                },
                {
                  "x": 301.0,
                  "y": 8.24
                },
                {
                  "x": 301.735,
                  "y": 9.745
                },
                {
                  "x": 302.0,
                  "y": 11.0
                }
              ]
            },
            {
              "startLaneIndex": 0,
              "endLaneIndex": 1,
              "points": [
                {
                  "x": 289.0,
                  "y": -2.0
                },
                {
                  "x": 290.367,
                  "y": -1.7349999999999999
                },
                {
                  "x": 292.176,
                  "y": -1.0
                },
                {
                  "x": 294.289,
                  "y": 0.115
                },
                {
                  "x": 296.568,
                  "y": 1.52
                },
                {
                  "x": 298.875,
                  "y": 3.125
                },
                {
                  "x": 301.072,
                  "y": 4.84
                },
                {
                  "x": 303.021,
                  "y": 6.575
                },
                {
                  "x": 304.584,
                  "y": 8.24
                },
                {
                  "x": 305.623,
                  "y": 9.745
                },
                {
                  "x": 306.0,
                  "y": 11.0
                }
              ]
            },
            {
              "startLaneIndex": 0,
              "endLaneIndex": 2,
              "points": [
                {
                  "x": 289.0,
                  "y": -2.0
                },
                {
                  "x": 290.479,
                  "y": -1.7349999999999999
                },
                {
                  "x": 292.592,
                  "y": -1.0
                },
                {
                  "x": 295.153,
                  "y": 0.115
                },
                {
                  "x": 297.976,
                  "y": 1.52
                },
                {
                  "x": 300.875,
                  "y": 3.125
                },
                {
                  "x": 303.664,
                  "y": 4.84
                },
                {
                  "x": 306.157,
                  "y": 6.575
                },
                {
                  "x": 308.168,
                  "y": 8.24
                },
                {
                  "x": 309.511,
                  "y": 9.745
                },
                {
                  "x": 310.0,
                  "y": 11.0
                }
              ]
            }
          ]
        },
        {
          "type": "turn_right",
          "startRoad": "road_1_1_0",
          "endRoad": "road_2_1_3",
          "direction": 0,
          "laneLinks": [
            {
              "startLaneIndex": 2,
              "endLaneIndex": 0,
              "points": [
                {
                  "x": 289.0,
                  "y": -10.0
                },
                {
                  "x": 290.143,
                  "y": -9.929
                },
                {
                  "x": 291.344,
                  "y": -9.752
                },
                {
                  "x": 292.561,
                  "y": -9.523
                },
                {
                  "x": 293.752,
                  "y": -9.296
                },
                {
                  "x": 294.875,
                  "y": -9.125
                },
                {
                  "x": 295.888,
                  "y": -9.064
                },
                {
                  "x": 296.749,
                  "y": -9.167
                },
                {
                  "x": 297.416,
                  "y": -9.488
                },
                {
                  "x": 297.847,
                  "y": -10.081
                },
                {
                  "x": 298.0,
                  "y": -11.0
                }
              ]
            },
            {
              "startLaneIndex": 2,
              "endLaneIndex": 1,
              "points": [
                {
                  "x": 289.0,
                  "y": -10.0
                },
                {
                  "x": 290.031,
                  "y": -9.929
                },
                {
                  "x": 290.928,
                  "y": -9.752
                },
                {
                  "x": 291.697,
                  "y": -9.523
                },
                {
                  "x": 292.344,
                  "y": -9.296
                },
                {
                  "x": 292.875,
                  "y": -9.125
                },
                {
                  "x": 293.296,
                  "y": -9.064
                },
                {
                  "x": 293.613,
                  "y": -9.167
                },
                {
                  "x": 293.832,
                  "y": -9.488
                },
                {
                  "x": 293.959,
                  "y": -10.081
                },
                {
                  "x": 294.0,
                  "y": -11.0
                }
              ]
            },
            {
              "startLaneIndex": 2,
              "endLaneIndex": 2,
              "points": [
                {
                  "x": 289.0,
                  "y": -10.0
                },
                {
                  "x": 289.919,
                  "y": -9.929
                },
                {
                  "x": 290.512,
                  "y": -9.752
                },
                {
                  "x": 290.83299999999997,
                  "y": -9.523
                },
                {
                  "x": 290.936,
                  "y": -9.296
                },
                {
                  "x": 290.875,
                  "y": -9.125
                },
                {
                  "x": 290.704,
                  "y": -9.064
                },
                {
                  "x": 290.477,
                  "y": -9.167
                },
                {
                  "x": 290.248,
                  "y": -9.488
                },
                {
                  "x": 290.071,
                  "y": -10.081
                },
                {
                  "x": 290.0,
                  "y": -11.0
                }
              ]
            }
          ]
        },
        {
          "type": "turn_right",
          "startRoad": "road_2_0_1",
          "endRoad": "road_2_1_0",
          "direction": 1,
          "laneLinks": [
            {
              "startLaneIndex": 2,
              "endLaneIndex": 0,
              "points": [
                {
                  "x": 310.0,
                  "y": -11.0
                },
                {
                  "x": 309.929,
                  "y": -9.857
                },
                {
                  "x": 309.752,
                  "y": -8.656
                },
                {
                  "x": 309.523,
                  "y": -7.439
                },
                {
                  "x": 309.296,
                  "y": -6.248
                },
                {
                  "x": 309.125,
                  "y": -5.125
                },
                {
                  "x": 309.064,
                  "y": -4.112
                },
                {
                  "x": 309.167,
                  "y": -3.251000000000001
                },
                {
                  "x": 309.488,
                  "y": -2.584000000000001
                },
                {
                  "x": 310.081,
                  "y": -2.153
                },
                {
                  "x": 311.0,
                  "y": -2.0
                }
              ]
            },
            {
              "startLaneIndex": 2,
              "endLaneIndex": 1,
              "points": [
                {
                  "x": 310.0,
                  "y": -11.0
                },
                {
                  "x": 309.929,
                  "y": -9.969
                },
                {
                  "x": 309.752,
                  "y": -9.072
                },
                {
                  "x": 309.523,
                  "y": -8.303
                },
                {
                  "x": 309.296,
                  "y": -7.656
                },
                {
                  "x": 309.125,
                  "y": -7.125
                },
                {
                  "x": 309.064,
                  "y": -6.704
                },
                {
                  "x": 309.167,
                  "y": -6.387000000000001
                },
                {
                  "x": 309.488,
                  "y": -6.168000000000001
                },
                {
                  "x": 310.081,
                  "y": -6.0409999999999995
                },
                {
                  "x": 311.0,
                  "y": -6.0
                }
              ]
            },
            {
              "startLaneIndex": 2,
              "endLaneIndex": 2,
              "points": [
                {
                  "x": 310.0,
                  "y": -11.0
                },
                {
                  "x": 309.929,
                  "y": -10.081
                },
                {
                  "x": 309.752,
                  "y": -9.488
                },
                {
                  "x": 309.523,
                  "y": -9.167
                },
                {
                  "x": 309.296,
                  "y": -9.064
                },
                {
                  "x": 309.125,
                  "y": -9.125
                },
                {
                  "x": 309.064,
                  "y": -9.296
                },
                {
                  "x": 309.167,
                  "y": -9.523000000000001
                },
                {
                  "x": 309.488,
                  "y": -9.752
                },
                {
                  "x": 310.081,
                  "y": -9.929
                },
                {
                  "x": 311.0,
                  "y": -10.0
                }
              ]
            }
          ]
        },
        {
          "type": "go_straight",
          "startRoad": "road_2_0_1",
          "endRoad": "road_2_1_1",
          "direction": 1,
          "laneLinks": [
            {
              "startLaneIndex": 1,
              "endLaneIndex": 0,
              "points": [
                {
                  "x": 306.0,
                  "y": -11.0
                },
                {
                  "x": 305.888,
                  "y": -9.592
                },
                {
                  "x": 305.584,
                  "y": -7.656
                },
                {
                  "x": 305.136,
                  "y": -5.324
                },
                {
                  "x": 304.592,
                  "y": -2.7279999999999998
                },
                {
                  "x": 304.0,
                  "y": 0.0
                },
                {
                  "x": 303.408,
                  "y": 2.7279999999999998
                },
                {
                  "x": 302.864,
                  "y": 5.323999999999999
                },
                {
                  "x": 302.416,
                  "y": 7.655999999999999
                },
                {
                  "x": 302.112,
                  "y": 9.592
                },
                {
                  "x": 302.0,
                  "y": 11.0
                }
              ]
            },
            {
              "startLaneIndex": 1,
              "endLaneIndex": 1,
              "points": [
                {
                  "x": 306.0,
                  "y": -11.0
                },
                {
                  "x": 306.0,
                  "y": -9.592
                },
                {
                  "x": 306.0,
                  "y": -7.656
                },
                {
                  "x": 306.0,
                  "y": -5.324
                },
                {
                  "x": 306.0,
                  "y": -2.7279999999999998
                },
                {
                  "x": 306.0,
                  "y": 0.0
                },
                {
                  "x": 306.0,
                  "y": 2.7279999999999998
                },
                {
                  "x": 306.0,
                  "y": 5.323999999999999
                },
                {
                  "x": 306.0,
                  "y": 7.655999999999999
                },
                {
                  "x": 306.0,
                  "y": 9.592
                },
                {
                  "x": 306.0,
                  "y": 11.0
                }
              ]
            },
            {
              "startLaneIndex": 1,
              "endLaneIndex": 2,
              "points": [
                {
                  "x": 306.0,
                  "y": -11.0
                },
                {
                  "x": 306.112,
                  "y": -9.592
                },
                {
                  "x": 306.416,
                  "y": -7.656
                },
                {
                  "x": 306.864,
                  "y": -5.324
                },
                {
                  "x": 307.408,
                  "y": -2.7279999999999998
                },
                {
                  "x": 308.0,
                  "y": 0.0
                },
                {
                  "x": 308.592,
                  "y": 2.7279999999999998
                },
                {
                  "x": 309.136,
                  "y": 5.323999999999999
                },
                {
                  "x": 309.584,
                  "y": 7.655999999999999
                },
                {
                  "x": 309.88800000000003,
                  "y": 9.592
                },
                {
                  "x": 310.0,
                  "y": 11.0
                }
              ]
            }
          ]
        },
        {
          "type": "turn_left",
          "startRoad": "road_2_0_1",
          "endRoad": "road_2_1_2",
          "direction": 1,
          "laneLinks": [
            {
              "startLaneIndex": 0,
              "endLaneIndex": 0,
              "points": [
                {
                  "x": 302.0,
                  "y": -11.0
                },
                {
                  "x": 301.735,
                  "y": -9.745
                },
                {
                  "x": 301.0,
                  "y": -8.24
                },
                {
                  "x": 299.885,
                  "y": -6.575
                },
                {
                  "x": 298.48,
                  "y": -4.84
                },
                {
                  "x": 296.875,
                  "y": -3.125
                },
                {
                  "x": 295.15999999999997,
                  "y": -1.52
                },
                {
                  "x": 293.425,
                  "y": -0.115000000000001
                },
                {
                  "x": 291.76,
                  "y": 0.999999999999999
                },
                {
                  "x": 290.255,
                  "y": 1.735
                },
                {
                  "x": 289.0,
                  "y": 2.0
                }
              ]
            },
            {
              "startLaneIndex": 0,
              "endLaneIndex": 1,
              "points": [
                {
                  "x": 302.0,
                  "y": -11.0
                },
                {
                  "x": 301.735,
                  "y": -9.633
                },
                {
                  "x": 301.0,
                  "y": -7.824
                },
                {
                  "x": 299.885,
                  "y": -5.711
                },
                {
                  "x": 298.48,
                  "y": -3.432
                },
                {
                  "x": 296.875,
                  "y": -1.125
                },
                {
                  "x": 295.15999999999997,
                  "y": 1.072
                },
                {
                  "x": 293.425,
                  "y": 3.020999999999999
                },
                {
                  "x": 291.76,
                  "y": 4.583999999999999
                },
                {
                  "x": 290.255,
                  "y": 5.623
                },
                {
                  "x": 289.0,
                  "y": 6.0
                }
              ]
            },
            {
              "startLaneIndex": 0,
              "endLaneIndex": 2,
              "points": [
                {
                  "x": 302.0,
                  "y": -11.0
                },
                {
                  "x": 301.735,
                  "y": -9.521
                },
                {
                  "x": 301.0,
                  "y": -7.408
                },
                {
                  "x": 299.885,
                  "y": -4.8469999999999995
                },
                {
                  "x": 298.48,
                  "y": -2.024
                },
                {
                  "x": 296.875,
                  "y": 0.875
                },
                {
                  "x": 295.15999999999997,
                  "y": 3.664
                },
                {
                  "x": 293.425,
                  "y": 6.156999999999999
                },
                {
                  "x": 291.76,
                  "y": 8.168
                },
                {
                  "x": 290.255,
                  "y": 9.511
                },
                {
                  "x": 289.0,
                  "y": 10.0
                }
              ]
            }
          ]
        },
        {
          "type": "turn_right",
          "startRoad": "road_3_1_2",
          "endRoad": "road_2_1_1",
          "direction": 2,
          "laneLinks": [
            {
              "startLaneIndex": 2,
              "endLaneIndex": 0,
              "points": [
                {
                  "x": 311.0,
                  "y": 10.0
                },
                {
                  "x": 309.85699999999997,
                  "y": 9.929
                },
                {
                  "x": 308.656,
                  "y": 9.752
                },
                {
                  "x": 307.439,
                  "y": 9.523
                },
                {
                  "x": 306.248,
                  "y": 9.296
                },
                {
                  "x": 305.125,
                  "y": 9.125
                },
                {
                  "x": 304.112,
                  "y": 9.064
                },
                {
                  "x": 303.251,
                  "y": 9.167
                },
                {
                  "x": 302.584,
                  "y": 9.488
                },
                {
                  "x": 302.153,
                  "y": 10.081
                },
                {
                  "x": 302.0,
                  "y": 11.0
                }
              ]
            },
            {
              "startLaneIndex": 2,
              "endLaneIndex": 1,
              "points": [
                {
                  "x": 311.0,
                  "y": 10.0
                },
                {
                  "x": 309.969,
                  "y": 9.929
                },
                {
                  "x": 309.072,
                  "y": 9.752
                },
                {
                  "x": 308.303,
                  "y": 9.523
                },
                {
                  "x": 307.656,
                  "y": 9.296
                },
                {
                  "x": 307.125,
                  "y": 9.125
                },
                {
                  "x": 306.704,
                  "y": 9.064
                },
                {
                  "x": 306.387,
                  "y": 9.167
                },
                {
                  "x": 306.168,
                  "y": 9.488
                },
                {
                  "x": 306.041,
                  "y": 10.081
                },
                {
                  "x": 306.0,
                  "y": 11.0
                }
              ]
            },
            {
              "startLaneIndex": 2,
              "endLaneIndex": 2,
              "points": [
                {
                  "x": 311.0,
                  "y": 10.0
                },
                {
                  "x": 310.081,
                  "y": 9.929
                },
                {
                  "x": 309.488,
                  "y": 9.752
                },
                {
                  "x": 309.167,
                  "y": 9.523
                },
                {
                  "x": 309.064,
                  "y": 9.296
                },
                {
                  "x": 309.125,
                  "y": 9.125
                },
                {
                  "x": 309.296,
                  "y": 9.064
                },
                {
                  "x": 309.523,
                  "y": 9.167
                },
                {
                  "x": 309.752,
                  "y": 9.488
                },
                {
                  "x": 309.92900000000003,
                  "y": 10.081
                },
                {
                  "x": 310.0,
                  "y": 11.0
                }
              ]
            }
          ]
        },
        {
          "type": "go_straight",
          "startRoad": "road_3_1_2",
          "endRoad": "road_2_1_2",
          "direction": 2,
          "laneLinks": [
            {
              "startLaneIndex": 1,
              "endLaneIndex": 0,
              "points": [
                {
                  "x": 311.0,
                  "y": 6.0
                },
                {
                  "x": 309.592,
                  "y": 5.888
                },
                {
                  "x": 307.656,
                  "y": 5.584
                },
                {
                  "x": 305.324,
                  "y": 5.136
                },
                {
                  "x": 302.728,
                  "y": 4.592
                },
                {
                  "x": 300.0,
                  "y": 4.0
                },
                {
                  "x": 297.272,
                  "y": 3.408
                },
                {
                  "x": 294.676,
                  "y": 2.864
                },
                {
                  "x": 292.344,
                  "y": 2.415999999999999
                },
                {
                  "x": 290.408,
                  "y": 2.112
                },
                {
                  "x": 289.0,
                  "y": 2.0
                }
              ]
            },
            {
              "startLaneIndex": 1,
              "endLaneIndex": 1,
              "points": [
                {
                  "x": 311.0,
                  "y": 6.0
                },
                {
                  "x": 309.592,
                  "y": 6.0
                },
                {
                  "x": 307.656,
                  "y": 6.0
                },
                {
                  "x": 305.324,
                  "y": 6.0
                },
                {
                  "x": 302.728,
                  "y": 6.0
                },
                {
                  "x": 300.0,
                  "y": 6.0
                },
                {
                  "x": 297.272,
                  "y": 6.0
                },
                {
                  "x": 294.676,
                  "y": 6.0
                },
                {
                  "x": 292.344,
                  "y": 5.999999999999999
                },
                {
                  "x": 290.408,
                  "y": 6.0
                },
                {
                  "x": 289.0,
                  "y": 6.0
                }
              ]
            },
            {
              "startLaneIndex": 1,
              "endLaneIndex": 2,
              "points": [
                {
                  "x": 311.0,
                  "y": 6.0
                },
                {
                  "x": 309.592,
                  "y": 6.112
                },
                {
                  "x": 307.656,
                  "y": 6.416
                },
                {
                  "x": 305.324,
                  "y": 6.864
                },
                {
                  "x": 302.728,
                  "y": 7.408
                },
                {
                  "x": 300.0,
                  "y": 8.0
                },
                {
                  "x": 297.272,
                  "y": 8.592
                },
                {
                  "x": 294.676,
                  "y": 9.136
                },
                {
                  "x": 292.344,
                  "y": 9.584
                },
                {
                  "x": 290.408,
                  "y": 9.888
                },
                {
                  "x": 289.0,
                  "y": 10.0
                }
              ]
            }
          ]
        },
        {
          "type": "turn_left",
          "startRoad": "road_3_1_2",
          "endRoad": "road_2_1_3",
          "direction": 2,
          "laneLinks": [
            {
              "startLaneIndex": 0,
              "endLaneIndex": 0,
              "points": [
                {
                  "x": 311.0,
                  "y": 2.0
                },
                {
                  "x": 309.745,
                  "y": 1.7349999999999999
                },
                {
                  "x": 308.24,
                  "y": 1.0
                },
                {
                  "x": 306.575,
                  "y": -0.115
                },
                {
                  "x": 304.84,
                  "y": -1.52
                },
                {
                  "x": 303.125,
                  "y": -3.125
                },
                {
                  "x": 301.52,
                  "y": -4.84
                },
                {
                  "x": 300.115,
                  "y": -6.575
                },
                {
                  "x": 299.0,
                  "y": -8.24
                },
                {
                  "x": 298.265,
                  "y": -9.745
                },
                {
                  "x": 298.0,
                  "y": -11.0
                }
              ]
            },
            {
              "startLaneIndex": 0,
              "endLaneIndex": 1,
              "points": [
                {
                  "x": 311.0,
                  "y": 2.0
                },
                {
                  "x": 309.633,
                  "y": 1.7349999999999999
                },
                {
                  "x": 307.824,
                  "y": 1.0
                },
                {
                  "x": 305.711,
                  "y": -0.115
                },
                {
                  "x": 303.432,
                  "y": -1.52
                },
                {
                  "x": 301.125,
                  "y": -3.125
                },
                {
                  "x": 298.928,
                  "y": -4.84
                },
                {
                  "x": 296.979,
                  "y": -6.575
                },
                {
                  "x": 295.416,
                  "y": -8.24
                },
                {
                  "x": 294.377,
                  "y": -9.745
                },
                {
                  "x": 294.0,
                  "y": -11.0
                }
              ]
            },
            {
              "startLaneIndex": 0,
              "endLaneIndex": 2,
              "points": [
                {
                  "x": 311.0,
                  "y": 2.0
                },
                {
                  "x": 309.521,
                  "y": 1.7349999999999999
                },
                {
                  "x": 307.408,
                  "y": 1.0
                },
                {
                  "x": 304.847,
                  "y": -0.115
                },
                {
                  "x": 302.024,
                  "y": -1.52
                },
                {
                  "x": 299.125,
                  "y": -3.125
                },
                {
                  "x": 296.336,
                  "y": -4.84
                },
                {
                  "x": 293.843,
                  "y": -6.575
                },
                {
                  "x": 291.832,
                  "y": -8.24
                },
                {
                  "x": 290.48900000000003,
                  "y": -9.745
                },
                {
                  "x": 290.0,
                  "y": -11.0
                }
              ]
            }
          ]
        },
        {
          "type": "turn_left",
          "startRoad": "road_2_2_3",
          "endRoad": "road_2_1_0",
          "direction": 3,
          "laneLinks": [
            {
              "startLaneIndex": 0,
              "endLaneIndex": 0,
              "points": [
                {
                  "x": 298.0,
                  "y": 11.0
                },
                {
                  "x": 298.265,
                  "y": 9.745
                },
                {
                  "x": 299.0,
                  "y": 8.24
                },
                {
                  "x": 300.115,
                  "y": 6.575
                },
                {
                  "x": 301.52,
                  "y": 4.84
                },
                {
                  "x": 303.125,
                  "y": 3.125
                },
                {
                  "x": 304.84,
                  "y": 1.52
                },
                {
                  "x": 306.575,
                  "y": 0.115000000000001
                },
                {
                  "x": 308.24,
                  "y": -0.999999999999999
                },
                {
                  "x": 309.745,
                  "y": -1.735
                },
                {
                  "x": 311.0,
                  "y": -2.0
                }
              ]
            },
            {
              "startLaneIndex": 0,
              "endLaneIndex": 1,
              "points": [
                {
                  "x": 298.0,
                  "y": 11.0
                },
                {
                  "x": 298.265,
                  "y": 9.633
                },
                {
                  "x": 299.0,
                  "y": 7.824
                },
                {
                  "x": 300.115,
                  "y": 5.711
                },
                {
                  "x": 301.52,
                  "y": 3.432
                },
                {
                  "x": 303.125,
                  "y": 1.125
                },
                {
                  "x": 304.84,
                  "y": -1.072
                },
                {
                  "x": 306.575,
                  "y": -3.020999999999999
                },
                {
                  "x": 308.24,
                  "y": -4.583999999999999
                },
                {
                  "x": 309.745,
                  "y": -5.623
                },
                {
                  "x": 311.0,
                  "y": -6.0
                }
              ]
            },
            {
              "startLaneIndex": 0,
              "endLaneIndex": 2,
              "points": [
                {
                  "x": 298.0,
                  "y": 11.0
                },
                {
                  "x": 298.265,
                  "y": 9.521
                },
                {
                  "x": 299.0,
                  "y": 7.408
                },
                {
                  "x": 300.115,
                  "y": 4.8469999999999995
                },
                {
                  "x": 301.52,
                  "y": 2.024
                },
                {
                  "x": 303.125,
                  "y": -0.875
                },
                {
                  "x": 304.84,
                  "y": -3.664
                },
                {
                  "x": 306.575,
                  "y": -6.156999999999999
                },
                {
                  "x": 308.24,
                  "y": -8.168
                },
                {
                  "x": 309.745,
                  "y": -9.511
                },
                {
                  "x": 311.0,
                  "y": -10.0
                }
              ]
            }
          ]
        },
        {
          "type": "turn_right",
          "startRoad": "road_2_2_3",
          "endRoad": "road_2_1_2",
          "direction": 3,
          "laneLinks": [
            {
              "startLaneIndex": 2,
              "endLaneIndex": 0,
              "points": [
                {
                  "x": 290.0,
                  "y": 11.0
                },
                {
                  "x": 290.071,
                  "y": 9.857
                },
                {
                  "x": 290.248,
                  "y": 8.656
                },
                {
                  "x": 290.477,
                  "y": 7.439
                },
                {
                  "x": 290.704,
                  "y": 6.248
                },
                {
                  "x": 290.875,
                  "y": 5.125
                },
                {
                  "x": 290.936,
                  "y": 4.112
                },
                {
                  "x": 290.83299999999997,
                  "y": 3.251000000000001
                },
                {
                  "x": 290.512,
                  "y": 2.584000000000001
                },
                {
                  "x": 289.919,
                  "y": 2.153
                },
                {
                  "x": 289.0,
                  "y": 2.0
                }
              ]
            },
            {
              "startLaneIndex": 2,
              "endLaneIndex": 1,
              "points": [
                {
                  "x": 290.0,
                  "y": 11.0
                },
                {
                  "x": 290.071,
                  "y": 9.969
                },
                {
                  "x": 290.248,
                  "y": 9.072
                },
                {
                  "x": 290.477,
                  "y": 8.303
                },
                {
                  "x": 290.704,
                  "y": 7.656
                },
                {
                  "x": 290.875,
                  "y": 7.125
                },
                {
                  "x": 290.936,
                  "y": 6.704
                },
                {
                  "x": 290.83299999999997,
                  "y": 6.387000000000001
                },
                {
                  "x": 290.512,
                  "y": 6.168000000000001
                },
                {
                  "x": 289.919,
                  "y": 6.0409999999999995
                },
                {
                  "x": 289.0,
                  "y": 6.0
                }
              ]
            },
            {
              "startLaneIndex": 2,
              "endLaneIndex": 2,
              "points": [
                {
                  "x": 290.0,
                  "y": 11.0
                },
                {
                  "x": 290.071,
                  "y": 10.081
                },
                {
                  "x": 290.248,
                  "y": 9.488
                },
                {
                  "x": 290.477,
                  "y": 9.167
                },
                {
                  "x": 290.704,
                  "y": 9.064
                },
                {
                  "x": 290.875,
                  "y": 9.125
                },
                {
                  "x": 290.936,
                  "y": 9.296
                },
                {
                  "x": 290.83299999999997,
                  "y": 9.523000000000001
                },
                {
                  "x": 290.512,
                  "y": 9.752
                },
                {
                  "x": 289.919,
                  "y": 9.929
                },
                {
                  "x": 289.0,
                  "y": 10.0
                }
              ]
            }
          ]
        },
        {
          "type": "go_straight",
          "startRoad": "road_2_2_3",
          "endRoad": "road_2_1_3",
          "direction": 3,
          "laneLinks": [
            {
              "startLaneIndex": 1,
              "endLaneIndex": 0,
              "points": [
                {
                  "x": 294.0,
                  "y": 11.0
                },
                {
                  "x": 294.112,
                  "y": 9.592
                },
                {
                  "x": 294.416,
                  "y": 7.656
                },
                {
                  "x": 294.864,
                  "y": 5.324
                },
                {
                  "x": 295.408,
                  "y": 2.7279999999999998
                },
                {
                  "x": 296.0,
                  "y": 0.0
                },
                {
                  "x": 296.592,
                  "y": -2.7279999999999998
                },
                {
                  "x": 297.136,
                  "y": -5.323999999999999
                },
                {
                  "x": 297.584,
                  "y": -7.655999999999999
                },
                {
                  "x": 297.888,
                  "y": -9.592
                },
                {
                  "x": 298.0,
                  "y": -11.0
                }
              ]
            },
            {
              "startLaneIndex": 1,
              "endLaneIndex": 1,
              "points": [
                {
                  "x": 294.0,
                  "y": 11.0
                },
                {
                  "x": 294.0,
                  "y": 9.592
                },
                {
                  "x": 294.0,
                  "y": 7.656
                },
                {
                  "x": 294.0,
                  "y": 5.324
                },
                {
                  "x": 294.0,
                  "y": 2.7279999999999998
                },
                {
                  "x": 294.0,
                  "y": 0.0
                },
                {
                  "x": 294.0,
                  "y": -2.7279999999999998
                },
                {
                  "x": 294.0,
                  "y": -5.323999999999999
                },
                {
                  "x": 294.0,
                  "y": -7.655999999999999
                },
                {
                  "x": 294.0,
                  "y": -9.592
                },
                {
                  "x": 294.0,
                  "y": -11.0
                }
              ]
            },
            {
              "startLaneIndex": 1,
              "endLaneIndex": 2,
              "points": [
                {
                  "x": 294.0,
                  "y": 11.0
                },
                {
                  "x": 293.888,
                  "y": 9.592
                },
                {
                  "x": 293.584,
                  "y": 7.656
                },
                {
                  "x": 293.136,
                  "y": 5.324
                },
                {
                  "x": 292.592,
                  "y": 2.7279999999999998
                },
                {
                  "x": 292.0,
                  "y": 0.0
                },
                {
                  "x": 291.408,
                  "y": -2.7279999999999998
                },
                {
                  "x": 290.864,
                  "y": -5.323999999999999
                },
                {
                  "x": 290.416,
                  "y": -7.655999999999999
                },
                {
                  "x": 290.112,
                  "y": -9.592
                },
                {
                  "x": 290.0,
                  "y": -11.0
                }
              ]
            }
          ]
        }
      ],
      "trafficLight": {
        "roadLinkIndices": [
          0,
          1,
          2,
          3,
          4,
          5,
          6,
          7,
          8,
          9,
          10,
          11
        ],
        "lightphases": [
          {
            "time": 5,
            "availableRoadLinks": [
              10,
              2,
              3,
              6
            ]
          },
          {
            "time": 30,
            "availableRoadLinks": [
              0,
              2,
              3,
              6,
              7,
              10
            ]
          },
          {
            "time": 30,
            "availableRoadLinks": [
              2,
              3,
              4,
              6,
              10,
              11
            ]
          },
          {
            "time": 30,
            "availableRoadLinks": [
              1,
              2,
              3,
              6,
              8,
              10
            ]
          },
          {
            "time": 30,
            "availableRoadLinks": [
              2,
              3,
              5,
              6,
              9,
              10
            ]
          },
          {
            "time": 30,
            "availableRoadLinks": [
              0,
              1,
              2,
              3,
              6,
              10
            ]
          },
          {
            "time": 30,
            "availableRoadLinks": [
              2,
              3,
              6,
              7,
              8,
              10
            ]
          },
          {
            "time": 30,
            "availableRoadLinks": [
              2,
              3,
              4,
              5,
              6,
              10
            ]
          },
          {
            "time": 30,
            "availableRoadLinks": [
              2,
              3,
              6,
              9,
              10,
              11
            ]
          }
        ]
      },
      "virtual": false
    },
    {
      "id": "intersection_2_2",
      "point": {
        "x": 300,
        "y": 300
      },
      "width": 11,
      "roads": [
        "road_1_2_0",
        "road_2_1_1",
        "road_3_2_2",
        "road_2_3_3",
        "road_2_2_0",
        "road_2_2_1",
        "road_2_2_2",
        "road_2_2_3"
      ],
      "roadLinks": [
        {
          "type": "go_straight",
          "startRoad": "road_1_2_0",
          "endRoad": "road_2_2_0",
          "direction": 0,
          "laneLinks": [
            {
              "startLaneIndex": 1,
              "endLaneIndex": 0,
              "points": [
                {
                  "x": 289.0,
                  "y": 294.0
                },
                {
                  "x": 290.408,
                  "y": 294.112
                },
                {
                  "x": 292.344,
                  "y": 294.416
                },
                {
                  "x": 294.676,
                  "y": 294.864
                },
                {
                  "x": 297.272,
                  "y": 295.408
                },
                {
                  "x": 300.0,
                  "y": 296.0
                },
                {
                  "x": 302.728,
                  "y": 296.592
                },
                {
                  "x": 305.324,
                  "y": 297.136
                },
                {
                  "x": 307.656,
                  "y": 297.584
                },
                {
                  "x": 309.592,
                  "y": 297.888
                },
                {
                  "x": 311.0,
                  "y": 298.0
                }
              ]
            },
            {
              "startLaneIndex": 1,
              "endLaneIndex": 1,
              "points": [
                {
                  "x": 289.0,
                  "y": 294.0
                },
                {
                  "x": 290.408,
                  "y": 294.0
                },
                {
                  "x": 292.344,
                  "y": 294.0
                },
                {
                  "x": 294.676,
                  "y": 294.0
                },
                {
                  "x": 297.272,
                  "y": 294.0
                },
                {
                  "x": 300.0,
                  "y": 294.0
                },
                {
                  "x": 302.728,
                  "y": 294.0
                },
                {
                  "x": 305.324,
                  "y": 294.0
                },
                {
                  "x": 307.656,
                  "y": 294.0
                },
                {
                  "x": 309.592,
                  "y": 294.0
                },
                {
                  "x": 311.0,
                  "y": 294.0
                }
              ]
            },
            {
              "startLaneIndex": 1,
              "endLaneIndex": 2,
              "points": [
                {
                  "x": 289.0,
                  "y": 294.0
                },
                {
                  "x": 290.408,
                  "y": 293.888
                },
                {
                  "x": 292.344,
                  "y": 293.584
                },
                {
                  "x": 294.676,
                  "y": 293.136
                },
                {
                  "x": 297.272,
                  "y": 292.592
                },
                {
                  "x": 300.0,
                  "y": 292.0
                },
                {
                  "x": 302.728,
                  "y": 291.408
                },
                {
                  "x": 305.324,
                  "y": 290.864
                },
                {
                  "x": 307.656,
                  "y": 290.416
                },
                {
                  "x": 309.592,
                  "y": 290.112
                },
                {
                  "x": 311.0,
                  "y": 290.0
                }
              ]
            }
          ]
        },
        {
          "type": "turn_left",
          "startRoad": "road_1_2_0",
          "endRoad": "road_2_2_1",
          "direction": 0,
          "laneLinks": [
            {
              "startLaneIndex": 0,
              "endLaneIndex": 0,
              "points": [
                {
                  "x": 289.0,
                  "y": 298.0
                },
                {
                  "x": 290.255,
                  "y": 298.265
                },
                {
                  "x": 291.76,
                  "y": 299.0
                },
                {
                  "x": 293.425,
                  "y": 300.115
                },
                {
                  "x": 295.15999999999997,
                  "y": 301.52
                },
                {
                  "x": 296.875,
                  "y": 303.125
                },
                {
                  "x": 298.48,
                  "y": 304.84
                },
                {
                  "x": 299.885,
                  "y": 306.575
                },
                {
                  "x": 301.0,
                  "y": 308.24
                },
                {
                  "x": 301.735,
                  "y": 309.745
                },
                {
                  "x": 302.0,
                  "y": 311.0
                }
              ]
            },
            {
              "startLaneIndex": 0,
              "endLaneIndex": 1,
              "points": [
                {
                  "x": 289.0,
                  "y": 298.0
                },
                {
                  "x": 290.367,
                  "y": 298.265
                },
                {
                  "x": 292.176,
                  "y": 299.0
                },
                {
                  "x": 294.289,
                  "y": 300.115
                },
                {
                  "x": 296.568,
                  "y": 301.52
                },
                {
                  "x": 298.875,
                  "y": 303.125
                },
                {
                  "x": 301.072,
                  "y": 304.84
                },
                {
                  "x": 303.021,
                  "y": 306.575
                },
                {
                  "x": 304.584,
                  "y": 308.24
                },
                {
                  "x": 305.623,
                  "y": 309.745
                },
                {
                  "x": 306.0,
                  "y": 311.0
                }
              ]
            },
            {
              "startLaneIndex": 0,
              "endLaneIndex": 2,
              "points": [
                {
                  "x": 289.0,
                  "y": 298.0
                },
                {
                  "x": 290.479,
                  "y": 298.265
                },
                {
                  "x": 292.592,
                  "y": 299.0
                },
                {
                  "x": 295.153,
                  "y": 300.115
                },
                {
                  "x": 297.976,
                  "y": 301.52
                },
                {
                  "x": 300.875,
                  "y": 303.125
                },
                {
                  "x": 303.664,
                  "y": 304.84
                },
                {
                  "x": 306.157,
                  "y": 306.575
                },
                {
                  "x": 308.168,
                  "y": 308.24
                },
                {
                  "x": 309.511,
                  "y": 309.745
                },
                {
                  "x": 310.0,
                  "y": 311.0
                }
              ]
            }
          ]
        },
        {
          "type": "turn_right",
          "startRoad": "road_1_2_0",
          "endRoad": "road_2_2_3",
          "direction": 0,
          "laneLinks": [
            {
              "startLaneIndex": 2,
              "endLaneIndex": 0,
              "points": [
                {
                  "x": 289.0,
                  "y": 290.0
                },
                {
                  "x": 290.143,
                  "y": 290.071
                },
                {
                  "x": 291.344,
                  "y": 290.248
                },
                {
                  "x": 292.561,
                  "y": 290.477
                },
                {
                  "x": 293.752,
                  "y": 290.704
                },
                {
                  "x": 294.875,
                  "y": 290.875
                },
                {
                  "x": 295.888,
                  "y": 290.936
                },
                {
                  "x": 296.749,
                  "y": 290.83299999999997
                },
                {
                  "x": 297.416,
                  "y": 290.512
                },
                {
                  "x": 297.847,
                  "y": 289.919
                },
                {
                  "x": 298.0,
                  "y": 289.0
                }
              ]
            },
            {
              "startLaneIndex": 2,
              "endLaneIndex": 1,
              "points": [
                {
                  "x": 289.0,
                  "y": 290.0
                },
                {
                  "x": 290.031,
                  "y": 290.071
                },
                {
                  "x": 290.928,
                  "y": 290.248
                },
                {
                  "x": 291.697,
                  "y": 290.477
                },
                {
                  "x": 292.344,
                  "y": 290.704
                },
                {
                  "x": 292.875,
                  "y": 290.875
                },
                {
                  "x": 293.296,
                  "y": 290.936
                },
                {
                  "x": 293.613,
                  "y": 290.83299999999997
                },
                {
                  "x": 293.832,
                  "y": 290.512
                },
                {
                  "x": 293.959,
                  "y": 289.919
                },
                {
                  "x": 294.0,
                  "y": 289.0
                }
              ]
            },
            {
              "startLaneIndex": 2,
              "endLaneIndex": 2,
              "points": [
                {
                  "x": 289.0,
                  "y": 290.0
                },
                {
                  "x": 289.919,
                  "y": 290.071
                },
                {
                  "x": 290.512,
                  "y": 290.248
                },
                {
                  "x": 290.83299999999997,
                  "y": 290.477
                },
                {
                  "x": 290.936,
                  "y": 290.704
                },
                {
                  "x": 290.875,
                  "y": 290.875
                },
                {
                  "x": 290.704,
                  "y": 290.936
                },
                {
                  "x": 290.477,
                  "y": 290.83299999999997
                },
                {
                  "x": 290.248,
                  "y": 290.512
                },
                {
                  "x": 290.071,
                  "y": 289.919
                },
                {
                  "x": 290.0,
                  "y": 289.0
                }
              ]
            }
          ]
        },
        {
          "type": "turn_right",
          "startRoad": "road_2_1_1",
          "endRoad": "road_2_2_0",
          "direction": 1,
          "laneLinks": [
            {
              "startLaneIndex": 2,
              "endLaneIndex": 0,
              "points": [
                {
                  "x": 310.0,
                  "y": 289.0
                },
                {
                  "x": 309.929,
                  "y": 290.143
                },
                {
                  "x": 309.752,
                  "y": 291.344
                },
                {
                  "x": 309.523,
                  "y": 292.561
                },
                {
                  "x": 309.296,
                  "y": 293.752
                },
                {
                  "x": 309.125,
                  "y": 294.875
                },
                {
                  "x": 309.064,
                  "y": 295.888
                },
                {
                  "x": 309.167,
                  "y": 296.749
                },
                {
                  "x": 309.488,
                  "y": 297.416
                },
                {
                  "x": 310.081,
                  "y": 297.847
                },
                {
                  "x": 311.0,
                  "y": 298.0
                }
              ]
            },
            {
              "startLaneIndex": 2,
              "endLaneIndex": 1,
              "points": [
                {
                  "x": 310.0,
                  "y": 289.0
                },
                {
                  "x": 309.929,
                  "y": 290.031
                },
                {
                  "x": 309.752,
                  "y": 290.928
                },
                {
                  "x": 309.523,
                  "y": 291.697
                },
                {
                  "x": 309.296,
                  "y": 292.344
                },
                {
                  "x": 309.125,
                  "y": 292.875
                },
                {
                  "x": 309.064,
                  "y": 293.296
                },
                {
                  "x": 309.167,
                  "y": 293.613
                },
                {
                  "x": 309.488,
                  "y": 293.832
                },
                {
                  "x": 310.081,
                  "y": 293.959
                },
                {
                  "x": 311.0,
                  "y": 294.0
                }
              ]
            },
            {
              "startLaneIndex": 2,
              "endLaneIndex": 2,
              "points": [
                {
                  "x": 310.0,
                  "y": 289.0
                },
                {
                  "x": 309.929,
                  "y": 289.919
                },
                {
                  "x": 309.752,
                  "y": 290.512
                },
                {
                  "x": 309.523,
                  "y": 290.83299999999997
                },
                {
                  "x": 309.296,
                  "y": 290.936
                },
                {
                  "x": 309.125,
                  "y": 290.875
                },
                {
                  "x": 309.064,
                  "y": 290.704
                },
                {
                  "x": 309.167,
                  "y": 290.477
                },
                {
                  "x": 309.488,
                  "y": 290.248
                },
                {
                  "x": 310.081,
                  "y": 290.071
                },
                {
                  "x": 311.0,
                  "y": 290.0
                }
              ]
            }
          ]
        },
        {
          "type": "go_straight",
          "startRoad": "road_2_1_1",
          "endRoad": "road_2_2_1",
          "direction": 1,
          "laneLinks": [
            {
              "startLaneIndex": 1,
              "endLaneIndex": 0,
              "points": [
                {
                  "x": 306.0,
                  "y": 289.0
                },
                {
                  "x": 305.888,
                  "y": 290.408
                },
                {
                  "x": 305.584,
                  "y": 292.344
                },
                {
                  "x": 305.136,
                  "y": 294.676
                },
                {
                  "x": 304.592,
                  "y": 297.272
                },
                {
                  "x": 304.0,
                  "y": 300.0
                },
                {
                  "x": 303.408,
                  "y": 302.728
                },
                {
                  "x": 302.864,
                  "y": 305.324
                },
                {
                  "x": 302.416,
                  "y": 307.656
                },
                {
                  "x": 302.112,
                  "y": 309.592
                },
                {
                  "x": 302.0,
                  "y": 311.0
                }
              ]
            },
            {
              "startLaneIndex": 1,
              "endLaneIndex": 1,
              "points": [
                {
                  "x": 306.0,
                  "y": 289.0
                },
                {
                  "x": 306.0,
                  "y": 290.408
                },
                {
                  "x": 306.0,
                  "y": 292.344
                },
                {
                  "x": 306.0,
                  "y": 294.676
                },
                {
                  "x": 306.0,
                  "y": 297.272
                },
                {
                  "x": 306.0,
                  "y": 300.0
                },
                {
                  "x": 306.0,
                  "y": 302.728
                },
                {
                  "x": 306.0,
                  "y": 305.324
                },
                {
                  "x": 306.0,
                  "y": 307.656
                },
                {
                  "x": 306.0,
                  "y": 309.592
                },
                {
                  "x": 306.0,
                  "y": 311.0
                }
              ]
            },
            {
              "startLaneIndex": 1,
              "endLaneIndex": 2,
              "points": [
                {
                  "x": 306.0,
                  "y": 289.0
                },
                {
                  "x": 306.112,
                  "y": 290.408
                },
                {
                  "x": 306.416,
                  "y": 292.344
                },
                {
                  "x": 306.864,
                  "y": 294.676
                },
                {
                  "x": 307.408,
                  "y": 297.272
                },
                {
                  "x": 308.0,
                  "y": 300.0
                },
                {
                  "x": 308.592,
                  "y": 302.728
                },
                {
                  "x": 309.136,
                  "y": 305.324
                },
                {
                  "x": 309.584,
                  "y": 307.656
                },
                {
                  "x": 309.88800000000003,
                  "y": 309.592
                },
                {
                  "x": 310.0,
                  "y": 311.0
                }
              ]
            }
          ]
        },
        {
          "type": "turn_left",
          "startRoad": "road_2_1_1",
          "endRoad": "road_2_2_2",
          "direction": 1,
          "laneLinks": [
            {
              "startLaneIndex": 0,
              "endLaneIndex": 0,
              "points": [
                {
                  "x": 302.0,
                  "y": 289.0
                },
                {
                  "x": 301.735,
                  "y": 290.255
                },
                {
                  "x": 301.0,
                  "y": 291.76
                },
                {
                  "x": 299.885,
                  "y": 293.425
                },
                {
                  "x": 298.48,
                  "y": 295.15999999999997
                },
                {
                  "x": 296.875,
                  "y": 296.875
                },
                {
                  "x": 295.15999999999997,
                  "y": 298.48
                },
                {
                  "x": 293.425,
                  "y": 299.885
                },
                {
                  "x": 291.76,
                  "y": 301.0
                },
                {
                  "x": 290.255,
                  "y": 301.735
                },
                {
                  "x": 289.0,
                  "y": 302.0
                }
              ]
            },
            {
              "startLaneIndex": 0,
              "endLaneIndex": 1,
              "points": [
                {
                  "x": 302.0,
                  "y": 289.0
                },
                {
                  "x": 301.735,
                  "y": 290.367
                },
                {
                  "x": 301.0,
                  "y": 292.176
                },
                {
                  "x": 299.885,
                  "y": 294.289
                },
                {
                  "x": 298.48,
                  "y": 296.568
                },
                {
                  "x": 296.875,
                  "y": 298.875
                },
                {
                  "x": 295.15999999999997,
                  "y": 301.072
                },
                {
                  "x": 293.425,
                  "y": 303.021
                },
                {
                  "x": 291.76,
                  "y": 304.584
                },
                {
                  "x": 290.255,
                  "y": 305.623
                },
                {
                  "x": 289.0,
                  "y": 306.0
                }
              ]
            },
            {
              "startLaneIndex": 0,
              "endLaneIndex": 2,
              "points": [
                {
                  "x": 302.0,
                  "y": 289.0
                },
                {
                  "x": 301.735,
                  "y": 290.479
                },
                {
                  "x": 301.0,
                  "y": 292.592
                },
                {
                  "x": 299.885,
                  "y": 295.153
                },
                {
                  "x": 298.48,
                  "y": 297.976
                },
                {
                  "x": 296.875,
                  "y": 300.875
                },
                {
                  "x": 295.15999999999997,
                  "y": 303.664
                },
                {
                  "x": 293.425,
                  "y": 306.157
                },
                {
                  "x": 291.76,
                  "y": 308.168
                },
                {
                  "x": 290.255,
                  "y": 309.511
                },
                {
                  "x": 289.0,
                  "y": 310.0
                }
              ]
            }
          ]
        },
        {
          "type": "turn_right",
          "startRoad": "road_3_2_2",
          "endRoad": "road_2_2_1",
          "direction": 2,
          "laneLinks": [
            {
              "startLaneIndex": 2,
              "endLaneIndex": 0,
              "points": [
                {
                  "x": 311.0,
                  "y": 310.0
                },
                {
                  "x": 309.85699999999997,
                  "y": 309.929
                },
                {
                  "x": 308.656,
                  "y": 309.752
                },
                {
                  "x": 307.439,
                  "y": 309.523
                },
                {
                  "x": 306.248,
                  "y": 309.296
                },
                {
                  "x": 305.125,
                  "y": 309.125
                },
                {
                  "x": 304.112,
                  "y": 309.064
                },
                {
                  "x": 303.251,
                  "y": 309.167
                },
                {
                  "x": 302.584,
                  "y": 309.488
                },
                {
                  "x": 302.153,
                  "y": 310.081
                },
                {
                  "x": 302.0,
                  "y": 311.0
                }
              ]
            },
            {
              "startLaneIndex": 2,
              "endLaneIndex": 1,
              "points": [
                {
                  "x": 311.0,
                  "y": 310.0
                },
                {
                  "x": 309.969,
                  "y": 309.929
                },
                {
                  "x": 309.072,
                  "y": 309.752
                },
                {
                  "x": 308.303,
                  "y": 309.523
                },
                {
                  "x": 307.656,
                  "y": 309.296
                },
                {
                  "x": 307.125,
                  "y": 309.125
                },
                {
                  "x": 306.704,
                  "y": 309.064
                },
                {
                  "x": 306.387,
                  "y": 309.167
                },
                {
                  "x": 306.168,
                  "y": 309.488
                },
                {
                  "x": 306.041,
                  "y": 310.081
                },
                {
                  "x": 306.0,
                  "y": 311.0
                }
              ]
            },
            {
              "startLaneIndex": 2,
              "endLaneIndex": 2,
              "points": [
                {
                  "x": 311.0,
                  "y": 310.0
                },
                {
                  "x": 310.081,
                  "y": 309.929
                },
                {
                  "x": 309.488,
                  "y": 309.752
                },
                {
                  "x": 309.167,
                  "y": 309.523
                },
                {
                  "x": 309.064,
                  "y": 309.296
                },
                {
                  "x": 309.125,
                  "y": 309.125
                },
                {
                  "x": 309.296,
                  "y": 309.064
                },
                {
                  "x": 309.523,
                  "y": 309.167
                },
                {
                  "x": 309.752,
                  "y": 309.488
                },
                {
                  "x": 309.92900000000003,
                  "y": 310.081
                },
                {
                  "x": 310.0,
                  "y": 311.0
                }
              ]
            }
          ]
        },
        {
          "type": "go_straight",
          "startRoad": "road_3_2_2",
          "endRoad": "road_2_2_2",
          "direction": 2,
          "laneLinks": [
            {
              "startLaneIndex": 1,
              "endLaneIndex": 0,
              "points": [
                {
                  "x": 311.0,
                  "y": 306.0
                },
                {
                  "x": 309.592,
                  "y": 305.888
                },
                {
                  "x": 307.656,
                  "y": 305.584
                },
                {
                  "x": 305.324,
                  "y": 305.136
                },
                {
                  "x": 302.728,
                  "y": 304.592
                },
                {
                  "x": 300.0,
                  "y": 304.0
                },
                {
                  "x": 297.272,
                  "y": 303.408
                },
                {
                  "x": 294.676,
                  "y": 302.864
                },
                {
                  "x": 292.344,
                  "y": 302.416
                },
                {
                  "x": 290.408,
                  "y": 302.112
                },
                {
                  "x": 289.0,
                  "y": 302.0
                }
              ]
            },
            {
              "startLaneIndex": 1,
              "endLaneIndex": 1,
              "points": [
                {
                  "x": 311.0,
                  "y": 306.0
                },
                {
                  "x": 309.592,
                  "y": 306.0
                },
                {
                  "x": 307.656,
                  "y": 306.0
                },
                {
                  "x": 305.324,
                  "y": 306.0
                },
                {
                  "x": 302.728,
                  "y": 306.0
                },
                {
                  "x": 300.0,
                  "y": 306.0
                },
                {
                  "x": 297.272,
                  "y": 306.0
                },
                {
                  "x": 294.676,
                  "y": 306.0
                },
                {
                  "x": 292.344,
                  "y": 306.0
                },
                {
                  "x": 290.408,
                  "y": 306.0
                },
                {
                  "x": 289.0,
                  "y": 306.0
                }
              ]
            },
            {
              "startLaneIndex": 1,
              "endLaneIndex": 2,
              "points": [
                {
                  "x": 311.0,
                  "y": 306.0
                },
                {
                  "x": 309.592,
                  "y": 306.112
                },
                {
                  "x": 307.656,
                  "y": 306.416
                },
                {
                  "x": 305.324,
                  "y": 306.864
                },
                {
                  "x": 302.728,
                  "y": 307.408
                },
                {
                  "x": 300.0,
                  "y": 308.0
                },
                {
                  "x": 297.272,
                  "y": 308.592
                },
                {
                  "x": 294.676,
                  "y": 309.136
                },
                {
                  "x": 292.344,
                  "y": 309.584
                },
                {
                  "x": 290.408,
                  "y": 309.88800000000003
                },
                {
                  "x": 289.0,
                  "y": 310.0
                }
              ]
            }
          ]
        },
        {
          "type": "turn_left",
          "startRoad": "road_3_2_2",
          "endRoad": "road_2_2_3",
          "direction": 2,
          "laneLinks": [
            {
              "startLaneIndex": 0,
              "endLaneIndex": 0,
              "points": [
                {
                  "x": 311.0,
                  "y": 302.0
                },
                {
                  "x": 309.745,
                  "y": 301.735
                },
                {
                  "x": 308.24,
                  "y": 301.0
                },
                {
                  "x": 306.575,
                  "y": 299.885
                },
                {
                  "x": 304.84,
                  "y": 298.48
                },
                {
                  "x": 303.125,
                  "y": 296.875
                },
                {
                  "x": 301.52,
                  "y": 295.15999999999997
                },
                {
                  "x": 300.115,
                  "y": 293.425
                },
                {
                  "x": 299.0,
                  "y": 291.76
                },
                {
                  "x": 298.265,
                  "y": 290.255
                },
                {
                  "x": 298.0,
                  "y": 289.0
                }
              ]
            },
            {
              "startLaneIndex": 0,
              "endLaneIndex": 1,
              "points": [
                {
                  "x": 311.0,
                  "y": 302.0
                },
                {
                  "x": 309.633,
                  "y": 301.735
                },
                {
                  "x": 307.824,
                  "y": 301.0
                },
                {
                  "x": 305.711,
                  "y": 299.885
                },
                {
                  "x": 303.432,
                  "y": 298.48
                },
                {
                  "x": 301.125,
                  "y": 296.875
                },
                {
                  "x": 298.928,
                  "y": 295.15999999999997
                },
                {
                  "x": 296.979,
                  "y": 293.425
                },
                {
                  "x": 295.416,
                  "y": 291.76
                },
                {
                  "x": 294.377,
                  "y": 290.255
                },
                {
                  "x": 294.0,
                  "y": 289.0
                }
              ]
            },
            {
              "startLaneIndex": 0,
              "endLaneIndex": 2,
              "points": [
                {
                  "x": 311.0,
                  "y": 302.0
                },
                {
                  "x": 309.521,
                  "y": 301.735
                },
                {
                  "x": 307.408,
                  "y": 301.0
                },
                {
                  "x": 304.847,
                  "y": 299.885
                },
                {
                  "x": 302.024,
                  "y": 298.48
                },
                {
                  "x": 299.125,
                  "y": 296.875
                },
                {
                  "x": 296.336,
                  "y": 295.15999999999997
                },
                {
                  "x": 293.843,
                  "y": 293.425
                },
                {
                  "x": 291.832,
                  "y": 291.76
                },
                {
                  "x": 290.48900000000003,
                  "y": 290.255
                },
                {
                  "x": 290.0,
                  "y": 289.0
                }
              ]
            }
          ]
        },
        {
          "type": "turn_left",
          "startRoad": "road_2_3_3",
          "endRoad": "road_2_2_0",
          "direction": 3,
          "laneLinks": [
            {
              "startLaneIndex": 0,
              "endLaneIndex": 0,
              "points": [
                {
                  "x": 298.0,
                  "y": 311.0
                },
                {
                  "x": 298.265,
                  "y": 309.745
                },
                {
                  "x": 299.0,
                  "y": 308.24
                },
                {
                  "x": 300.115,
                  "y": 306.575
                },
                {
                  "x": 301.52,
                  "y": 304.84
                },
                {
                  "x": 303.125,
                  "y": 303.125
                },
                {
                  "x": 304.84,
                  "y": 301.52
                },
                {
                  "x": 306.575,
                  "y": 300.115
                },
                {
                  "x": 308.24,
                  "y": 299.0
                },
                {
                  "x": 309.745,
                  "y": 298.265
                },
                {
                  "x": 311.0,
                  "y": 298.0
                }
              ]
            },
            {
              "startLaneIndex": 0,
              "endLaneIndex": 1,
              "points": [
                {
                  "x": 298.0,
                  "y": 311.0
                },
                {
                  "x": 298.265,
                  "y": 309.633
                },
                {
                  "x": 299.0,
                  "y": 307.824
                },
                {
                  "x": 300.115,
                  "y": 305.711
                },
                {
                  "x": 301.52,
                  "y": 303.432
                },
                {
                  "x": 303.125,
                  "y": 301.125
                },
                {
                  "x": 304.84,
                  "y": 298.928
                },
                {
                  "x": 306.575,
                  "y": 296.979
                },
                {
                  "x": 308.24,
                  "y": 295.416
                },
                {
                  "x": 309.745,
                  "y": 294.377
                },
                {
                  "x": 311.0,
                  "y": 294.0
                }
              ]
            },
            {
              "startLaneIndex": 0,
              "endLaneIndex": 2,
              "points": [
                {
                  "x": 298.0,
                  "y": 311.0
                },
                {
                  "x": 298.265,
                  "y": 309.521
                },
                {
                  "x": 299.0,
                  "y": 307.408
                },
                {
                  "x": 300.115,
                  "y": 304.847
                },
                {
                  "x": 301.52,
                  "y": 302.024
                },
                {
                  "x": 303.125,
                  "y": 299.125
                },
                {
                  "x": 304.84,
                  "y": 296.336
                },
                {
                  "x": 306.575,
                  "y": 293.843
                },
                {
                  "x": 308.24,
                  "y": 291.832
                },
                {
                  "x": 309.745,
                  "y": 290.48900000000003
                },
                {
                  "x": 311.0,
                  "y": 290.0
                }
              ]
            }
          ]
        },
        {
          "type": "turn_right",
          "startRoad": "road_2_3_3",
          "endRoad": "road_2_2_2",
          "direction": 3,
          "laneLinks": [
            {
              "startLaneIndex": 2,
              "endLaneIndex": 0,
              "points": [
                {
                  "x": 290.0,
                  "y": 311.0
                },
                {
                  "x": 290.071,
                  "y": 309.85699999999997
                },
                {
                  "x": 290.248,
                  "y": 308.656
                },
                {
                  "x": 290.477,
                  "y": 307.439
                },
                {
                  "x": 290.704,
                  "y": 306.248
                },
                {
                  "x": 290.875,
                  "y": 305.125
                },
                {
                  "x": 290.936,
                  "y": 304.112
                },
                {
                  "x": 290.83299999999997,
                  "y": 303.251
                },
                {
                  "x": 290.512,
                  "y": 302.584
                },
                {
                  "x": 289.919,
                  "y": 302.153
                },
                {
                  "x": 289.0,
                  "y": 302.0
                }
              ]
            },
            {
              "startLaneIndex": 2,
              "endLaneIndex": 1,
              "points": [
                {
                  "x": 290.0,
                  "y": 311.0
                },
                {
                  "x": 290.071,
                  "y": 309.969
                },
                {
                  "x": 290.248,
                  "y": 309.072
                },
                {
                  "x": 290.477,
                  "y": 308.303
                },
                {
                  "x": 290.704,
                  "y": 307.656
                },
                {
                  "x": 290.875,
                  "y": 307.125
                },
                {
                  "x": 290.936,
                  "y": 306.704
                },
                {
                  "x": 290.83299999999997,
                  "y": 306.387
                },
                {
                  "x": 290.512,
                  "y": 306.168
                },
                {
                  "x": 289.919,
                  "y": 306.041
                },
                {
                  "x": 289.0,
                  "y": 306.0
                }
              ]
            },
            {
              "startLaneIndex": 2,
              "endLaneIndex": 2,
              "points": [
                {
                  "x": 290.0,
                  "y": 311.0
                },
                {
                  "x": 290.071,
                  "y": 310.081
                },
                {
                  "x": 290.248,
                  "y": 309.488
                },
                {
                  "x": 290.477,
                  "y": 309.167
                },
                {
                  "x": 290.704,
                  "y": 309.064
                },
                {
                  "x": 290.875,
                  "y": 309.125
                },
                {
                  "x": 290.936,
                  "y": 309.296
                },
                {
                  "x": 290.83299999999997,
                  "y": 309.523
                },
                {
                  "x": 290.512,
                  "y": 309.752
                },
                {
                  "x": 289.919,
                  "y": 309.92900000000003
                },
                {
                  "x": 289.0,
                  "y": 310.0
                }
              ]
            }
          ]
        },
        {
          "type": "go_straight",
          "startRoad": "road_2_3_3",
          "endRoad": "road_2_2_3",
          "direction": 3,
          "laneLinks": [
            {
              "startLaneIndex": 1,
              "endLaneIndex": 0,
              "points": [
                {
                  "x": 294.0,
                  "y": 311.0
                },
                {
                  "x": 294.112,
                  "y": 309.592
                },
                {
                  "x": 294.416,
                  "y": 307.656
                },
                {
                  "x": 294.864,
                  "y": 305.324
                },
                {
                  "x": 295.408,
                  "y": 302.728
                },
                {
                  "x": 296.0,
                  "y": 300.0
                },
                {
                  "x": 296.592,
                  "y": 297.272
                },
                {
                  "x": 297.136,
                  "y": 294.676
                },
                {
                  "x": 297.584,
                  "y": 292.344
                },
                {
                  "x": 297.888,
                  "y": 290.408
                },
                {
                  "x": 298.0,
                  "y": 289.0
                }
              ]
            },
            {
              "startLaneIndex": 1,
              "endLaneIndex": 1,
              "points": [
                {
                  "x": 294.0,
                  "y": 311.0
                },
                {
                  "x": 294.0,
                  "y": 309.592
                },
                {
                  "x": 294.0,
                  "y": 307.656
                },
                {
                  "x": 294.0,
                  "y": 305.324
                },
                {
                  "x": 294.0,
                  "y": 302.728
                },
                {
                  "x": 294.0,
                  "y": 300.0
                },
                {
                  "x": 294.0,
                  "y": 297.272
                },
                {
                  "x": 294.0,
                  "y": 294.676
                },
                {
                  "x": 294.0,
[truncated: 1,491,402 more chars]
