# Supplementary material
Source: ML conference proceedings conference paper supplement (https://proceedings.neurips.cc/paper_files/paper/2021/hash/654516d1b4df6917094de807156adc14-Abstract.html)
Supplement: Supplementary file 1 [file 654516d1b4df6917094de807156adc14-Supplemental.zip › neurips-supplementary/codes/data/template_lsr/10_10/anon_10_10_300_0.3_uni.json]

[
  {
    "vehicle": {
      "length": 5.0,
      "width": 2.0,
      "maxPosAcc": 2.0,
      "maxNegAcc": 4.5,
      "usualPosAcc": 2.0,
      "usualNegAcc": 4.5,
      "minGap": 2.5,
      "maxSpeed": 11.111,
      "headwayTime": 2
    },
    "route": [
      "road_0_1_0",
      "road_1_1_0",
      "road_2_1_0",
      "road_3_1_0",
      "road_4_1_0",
      "road_5_1_0",
      "road_6_1_0",
      "road_7_1_0",
      "road_8_1_0",
      "road_9_1_0",
      "road_10_1_0"
    ],
    "interval": 12.0,
    "startTime": 0,
    "endTime": 14400
  },
  {
    "vehicle": {
      "length": 5.0,
      "width": 2.0,
      "maxPosAcc": 2.0,
      "maxNegAcc": 4.5,
      "usualPosAcc": 2.0,
      "usualNegAcc": 4.5,
      "minGap": 2.5,
      "maxSpeed": 11.111,
      "headwayTime": 2
    },
    "route": [
      "road_0_2_0",
      "road_1_2_0",
      "road_2_2_0",
      "road_3_2_0",
      "road_4_2_0",
      "road_5_2_0",
      "road_6_2_0",
      "road_7_2_0",
      "road_8_2_0",
      "road_9_2_0",
      "road_10_2_0"
    ],
    "interval": 12.0,
    "startTime": 0,
    "endTime": 14400
  },
  {
    "vehicle": {
      "length": 5.0,
      "width": 2.0,
      "maxPosAcc": 2.0,
      "maxNegAcc": 4.5,
      "usualPosAcc": 2.0,
      "usualNegAcc": 4.5,
      "minGap": 2.5,
      "maxSpeed": 11.111,
      "headwayTime": 2
    },
    "route": [
      "road_0_3_0",
      "road_1_3_0",
      "road_2_3_0",
      "road_3_3_0",
      "road_4_3_0",
      "road_5_3_0",
      "road_6_3_0",
      "road_7_3_0",
      "road_8_3_0",
      "road_9_3_0",
      "road_10_3_0"
    ],
    "interval": 12.0,
    "startTime": 0,
    "endTime": 14400
  },
  {
    "vehicle": {
      "length": 5.0,
      "width": 2.0,
      "maxPosAcc": 2.0,
      "maxNegAcc": 4.5,
      "usualPosAcc": 2.0,
      "usualNegAcc": 4.5,
      "minGap": 2.5,
      "maxSpeed": 11.111,
      "headwayTime": 2
    },
    "route": [
      "road_0_4_0",
      "road_1_4_0",
      "road_2_4_0",
      "road_3_4_0",
      "road_4_4_0",
      "road_5_4_0",
      "road_6_4_0",
      "road_7_4_0",
      "road_8_4_0",
      "road_9_4_0",
      "road_10_4_0"
    ],
    "interval": 12.0,
    "startTime": 0,
    "endTime": 14400
  },
  {
    "vehicle": {
      "length": 5.0,
      "width": 2.0,
      "maxPosAcc": 2.0,
      "maxNegAcc": 4.5,
      "usualPosAcc": 2.0,
      "usualNegAcc": 4.5,
      "minGap": 2.5,
      "maxSpeed": 11.111,
      "headwayTime": 2
    },
    "route": [
      "road_0_5_0",
      "road_1_5_0",
      "road_2_5_0",
      "road_3_5_0",
      "road_4_5_0",
      "road_5_5_0",
      "road_6_5_0",
      "road_7_5_0",
      "road_8_5_0",
      "road_9_5_0",
      "road_10_5_0"
    ],
    "interval": 12.0,
    "startTime": 0,
    "endTime": 14400
  },
  {
    "vehicle": {
      "length": 5.0,
      "width": 2.0,
      "maxPosAcc": 2.0,
      "maxNegAcc": 4.5,
      "usualPosAcc": 2.0,
      "usualNegAcc": 4.5,
      "minGap": 2.5,
      "maxSpeed": 11.111,
      "headwayTime": 2
    },
    "route": [
      "road_0_6_0",
      "road_1_6_0",
      "road_2_6_0",
      "road_3_6_0",
      "road_4_6_0",
      "road_5_6_0",
      "road_6_6_0",
      "road_7_6_0",
      "road_8_6_0",
      "road_9_6_0",
      "road_10_6_0"
    ],
    "interval": 12.0,
    "startTime": 0,
    "endTime": 14400
  },
  {
    "vehicle": {
      "length": 5.0,
      "width": 2.0,
      "maxPosAcc": 2.0,
      "maxNegAcc": 4.5,
      "usualPosAcc": 2.0,
      "usualNegAcc": 4.5,
      "minGap": 2.5,
      "maxSpeed": 11.111,
      "headwayTime": 2
    },
    "route": [
      "road_0_7_0",
      "road_1_7_0",
      "road_2_7_0",
      "road_3_7_0",
      "road_4_7_0",
      "road_5_7_0",
      "road_6_7_0",
      "road_7_7_0",
      "road_8_7_0",
      "road_9_7_0",
      "road_10_7_0"
    ],
    "interval": 12.0,
    "startTime": 0,
    "endTime": 14400
  },
  {
    "vehicle": {
      "length": 5.0,
      "width": 2.0,
      "maxPosAcc": 2.0,
      "maxNegAcc": 4.5,
      "usualPosAcc": 2.0,
      "usualNegAcc": 4.5,
      "minGap": 2.5,
      "maxSpeed": 11.111,
      "headwayTime": 2
    },
    "route": [
      "road_0_8_0",
      "road_1_8_0",
      "road_2_8_0",
      "road_3_8_0",
      "road_4_8_0",
      "road_5_8_0",
      "road_6_8_0",
      "road_7_8_0",
      "road_8_8_0",
      "road_9_8_0",
      "road_10_8_0"
    ],
    "interval": 12.0,
    "startTime": 0,
    "endTime": 14400
  },
  {
    "vehicle": {
      "length": 5.0,
      "width": 2.0,
      "maxPosAcc": 2.0,
      "maxNegAcc": 4.5,
      "usualPosAcc": 2.0,
      "usualNegAcc": 4.5,
      "minGap": 2.5,
      "maxSpeed": 11.111,
      "headwayTime": 2
    },
    "route": [
      "road_0_9_0",
      "road_1_9_0",
      "road_2_9_0",
      "road_3_9_0",
      "road_4_9_0",
      "road_5_9_0",
      "road_6_9_0",
      "road_7_9_0",
      "road_8_9_0",
      "road_9_9_0",
      "road_10_9_0"
    ],
    "interval": 12.0,
    "startTime": 0,
    "endTime": 14400
  },
  {
    "vehicle": {
      "length": 5.0,
      "width": 2.0,
      "maxPosAcc": 2.0,
      "maxNegAcc": 4.5,
      "usualPosAcc": 2.0,
      "usualNegAcc": 4.5,
      "minGap": 2.5,
      "maxSpeed": 11.111,
      "headwayTime": 2
    },
    "route": [
      "road_0_10_0",
      "road_1_10_0",
      "road_2_10_0",
      "road_3_10_0",
      "road_4_10_0",
      "road_5_10_0",
      "road_6_10_0",
      "road_7_10_0",
      "road_8_10_0",
      "road_9_10_0",
      "road_10_10_0"
    ],
    "interval": 12.0,
    "startTime": 0,
    "endTime": 14400
  },
  {
    "vehicle": {
      "length": 5.0,
      "width": 2.0,
      "maxPosAcc": 2.0,
      "maxNegAcc": 4.5,
      "usualPosAcc": 2.0,
      "usualNegAcc": 4.5,
      "minGap": 2.5,
      "maxSpeed": 11.111,
      "headwayTime": 2
    },
    "route": [
      "road_1_0_1",
      "road_1_1_1",
      "road_1_2_1",
      "road_1_3_1",
      "road_1_4_1",
      "road_1_5_1",
      "road_1_6_1",
      "road_1_7_1",
      "road_1_8_1",
      "road_1_9_1",
      "road_1_10_1"
    ],
    "interval": 40.0,
    "startTime": 0,
    "endTime": 14400
  },
  {
    "vehicle": {
      "length": 5.0,
      "width": 2.0,
      "maxPosAcc": 2.0,
      "maxNegAcc": 4.5,
      "usualPosAcc": 2.0,
      "usualNegAcc": 4.5,
      "minGap": 2.5,
      "maxSpeed": 11.111,
      "headwayTime": 2
    },
    "route": [
      "road_2_0_1",
      "road_2_1_1",
      "road_2_2_1",
      "road_2_3_1",
      "road_2_4_1",
      "road_2_5_1",
      "road_2_6_1",
      "road_2_7_1",
      "road_2_8_1",
      "road_2_9_1",
      "road_2_10_1"
    ],
    "interval": 40.0,
    "startTime": 0,
    "endTime": 14400
  },
  {
    "vehicle": {
      "length": 5.0,
      "width": 2.0,
      "maxPosAcc": 2.0,
      "maxNegAcc": 4.5,
      "usualPosAcc": 2.0,
      "usualNegAcc": 4.5,
      "minGap": 2.5,
      "maxSpeed": 11.111,
      "headwayTime": 2
    },
    "route": [
      "road_3_0_1",
      "road_3_1_1",
      "road_3_2_1",
      "road_3_3_1",
      "road_3_4_1",
      "road_3_5_1",
      "road_3_6_1",
      "road_3_7_1",
      "road_3_8_1",
      "road_3_9_1",
      "road_3_10_1"
    ],
    "interval": 40.0,
    "startTime": 0,
    "endTime": 14400
  },
  {
    "vehicle": {
      "length": 5.0,
      "width": 2.0,
      "maxPosAcc": 2.0,
      "maxNegAcc": 4.5,
      "usualPosAcc": 2.0,
      "usualNegAcc": 4.5,
      "minGap": 2.5,
      "maxSpeed": 11.111,
      "headwayTime": 2
    },
    "route": [
      "road_4_0_1",
      "road_4_1_1",
      "road_4_2_1",
      "road_4_3_1",
      "road_4_4_1",
      "road_4_5_1",
      "road_4_6_1",
      "road_4_7_1",
      "road_4_8_1",
      "road_4_9_1",
      "road_4_10_1"
    ],
    "interval": 40.0,
    "startTime": 0,
    "endTime": 14400
  },
  {
    "vehicle": {
      "length": 5.0,
      "width": 2.0,
      "maxPosAcc": 2.0,
      "maxNegAcc": 4.5,
      "usualPosAcc": 2.0,
      "usualNegAcc": 4.5,
      "minGap": 2.5,
      "maxSpeed": 11.111,
      "headwayTime": 2
    },
    "route": [
      "road_5_0_1",
      "road_5_1_1",
      "road_5_2_1",
      "road_5_3_1",
      "road_5_4_1",
      "road_5_5_1",
      "road_5_6_1",
      "road_5_7_1",
      "road_5_8_1",
      "road_5_9_1",
      "road_5_10_1"
    ],
    "interval": 40.0,
    "startTime": 0,
    "endTime": 14400
  },
  {
    "vehicle": {
      "length": 5.0,
      "width": 2.0,
      "maxPosAcc": 2.0,
      "maxNegAcc": 4.5,
      "usualPosAcc": 2.0,
      "usualNegAcc": 4.5,
      "minGap": 2.5,
      "maxSpeed": 11.111,
      "headwayTime": 2
    },
    "route": [
      "road_6_0_1",
      "road_6_1_1",
      "road_6_2_1",
      "road_6_3_1",
      "road_6_4_1",
      "road_6_5_1",
      "road_6_6_1",
      "road_6_7_1",
      "road_6_8_1",
      "road_6_9_1",
      "road_6_10_1"
    ],
    "interval": 40.0,
    "startTime": 0,
    "endTime": 14400
  },
  {
    "vehicle": {
      "length": 5.0,
      "width": 2.0,
      "maxPosAcc": 2.0,
      "maxNegAcc": 4.5,
      "usualPosAcc": 2.0,
      "usualNegAcc": 4.5,
      "minGap": 2.5,
      "maxSpeed": 11.111,
      "headwayTime": 2
    },
    "route": [
      "road_7_0_1",
      "road_7_1_1",
      "road_7_2_1",
      "road_7_3_1",
      "road_7_4_1",
      "road_7_5_1",
      "road_7_6_1",
      "road_7_7_1",
      "road_7_8_1",
      "road_7_9_1",
      "road_7_10_1"
    ],
    "interval": 40.0,
    "startTime": 0,
    "endTime": 14400
  },
  {
    "vehicle": {
      "length": 5.0,
      "width": 2.0,
      "maxPosAcc": 2.0,
      "maxNegAcc": 4.5,
      "usualPosAcc": 2.0,
      "usualNegAcc": 4.5,
      "minGap": 2.5,
      "maxSpeed": 11.111,
      "headwayTime": 2
    },
    "route": [
      "road_8_0_1",
      "road_8_1_1",
      "road_8_2_1",
      "road_8_3_1",
      "road_8_4_1",
      "road_8_5_1",
      "road_8_6_1",
      "road_8_7_1",
      "road_8_8_1",
      "road_8_9_1",
      "road_8_10_1"
    ],
    "interval": 40.0,
    "startTime": 0,
    "endTime": 14400
  },
  {
    "vehicle": {
      "length": 5.0,
      "width": 2.0,
      "maxPosAcc": 2.0,
      "maxNegAcc": 4.5,
      "usualPosAcc": 2.0,
      "usualNegAcc": 4.5,
      "minGap": 2.5,
      "maxSpeed": 11.111,
      "headwayTime": 2
    },
    "route": [
      "road_9_0_1",
      "road_9_1_1",
      "road_9_2_1",
      "road_9_3_1",
      "road_9_4_1",
      "road_9_5_1",
      "road_9_6_1",
      "road_9_7_1",
      "road_9_8_1",
      "road_9_9_1",
      "road_9_10_1"
    ],
    "interval": 40.0,
    "startTime": 0,
    "endTime": 14400
  },
  {
    "vehicle": {
      "length": 5.0,
      "width": 2.0,
      "maxPosAcc": 2.0,
      "maxNegAcc": 4.5,
      "usualPosAcc": 2.0,
      "usualNegAcc": 4.5,
      "minGap": 2.5,
      "maxSpeed": 11.111,
      "headwayTime": 2
    },
    "route": [
      "road_10_0_1",
      "road_10_1_1",
      "road_10_2_1",
      "road_10_3_1",
      "road_10_4_1",
      "road_10_5_1",
      "road_10_6_1",
      "road_10_7_1",
      "road_10_8_1",
      "road_10_9_1",
      "road_10_10_1"
    ],
    "interval": 40.0,
    "startTime": 0,
    "endTime": 14400
  }
]
