# Supplementary material
Source: ML conference proceedings conference paper supplement (https://proceedings.neurips.cc/paper_files/paper/2021/hash/654516d1b4df6917094de807156adc14-Abstract.html)
Supplement: Supplementary file 1 [file 654516d1b4df6917094de807156adc14-Supplemental.zip › neurips-supplementary/codes/data/template_s/1_1/cross.con.xml]

<connections>
<connection from="edge-inter0_0.nodeN-inter0_0" to="edge-inter0_0-inter0_0.nodeS" fromLane="0" toLane="0" />
<connection from="edge-inter0_0.nodeE-inter0_0" to="edge-inter0_0-inter0_0.nodeW" fromLane="0" toLane="0" />
<connection from="edge-inter0_0.nodeS-inter0_0" to="edge-inter0_0-inter0_0.nodeN" fromLane="0" toLane="0" />
<connection from="edge-inter0_0.nodeW-inter0_0" to="edge-inter0_0-inter0_0.nodeE" fromLane="0" toLane="0" />
</connections>
