# Supplementary material
Source: ML conference proceedings conference paper supplement (https://proceedings.neurips.cc/paper_files/paper/2021/hash/654516d1b4df6917094de807156adc14-Abstract.html)
Supplement: Supplementary file 1 [file 654516d1b4df6917094de807156adc14-Supplemental.zip › neurips-supplementary/codes/data/template_s/1_1/cross.tll.xml]

<tlLogics>
<tlLogic id="inter0_0" type="static" programID="0" offset="0">
<phase duration = "1000000" state = "rGrG" />
<phase duration = "4" state = "yyyy" />
<phase duration = "1000000" state = "GrGr" />
<phase duration = "4" state = "yyyy" />
</tlLogic>
</tlLogics>
