# Supplementary material
Source: ML conference proceedings conference paper supplement (https://proceedings.neurips.cc/paper_files/paper/2021/hash/654516d1b4df6917094de807156adc14-Abstract.html)
Supplement: Supplementary file 1 [file 654516d1b4df6917094de807156adc14-Supplemental.zip › neurips-supplementary/codes/data/template_s/1_2/sumo_1_2_600_0.6.xml]

<routes>
    <flow id="01" type="Car" begin="0" end="72000" number="12000" from="edge-left-0" to="edge-1-right" departPos="0" departLane="best" departSpeed="0"/>
    <flow id="02" type="Car" begin="0" end="72000" number="12000" from="edge-right-1" to="edge-0-left" departPos="0" departLane="best" departSpeed="0"/>
    <flow id="03" type="Car" begin="0" end="72000" number="7200" from="edge-up-0" to="edge-0-down" departPos="0" departLane="best" departSpeed="0"/>
    <flow id="04" type="Car" begin="0" end="72000" number="7200" from="edge-down-0" to="edge-0-up" departPos="0" departLane="best" departSpeed="0"/>
    <flow id="05" type="Car" begin="0" end="72000" number="7200" from="edge-up-1" to="edge-1-down" departPos="0" departLane="best" departSpeed="0"/>
    <flow id="06" type="Car" begin="0" end="72000" number="7200" from="edge-down-1" to="edge-1-up" departPos="0" departLane="best" departSpeed="0"/>
</routes>
