# Supplementary material
Source: ML conference proceedings conference paper supplement (https://proceedings.neurips.cc/paper_files/paper/2021/hash/654516d1b4df6917094de807156adc14-Abstract.html)
Supplement: Supplementary file 1 [file 654516d1b4df6917094de807156adc14-Supplemental.zip › neurips-supplementary/codes/data/template_s/1_10/roadnet_1_10.json]

{
  "intersections": [
    {
      "id": "intersection_0_1",
      "point": {
        "x": -300,
        "y": 0
      },
      "width": 0,
      "roads": [
        "road_1_1_2",
        "road_0_1_0"
      ],
      "roadLinks": [],
      "trafficLight": {
        "roadLinkIndices": [],
        "lightphases": [
          {
            "time": 5,
            "availableRoadLinks": []
          },
          {
            "time": 30,
            "availableRoadLinks": []
          },
          {
            "time": 30,
            "availableRoadLinks": []
          },
          {
            "time": 30,
            "availableRoadLinks": []
          },
          {
            "time": 30,
            "availableRoadLinks": []
          },
          {
            "time": 30,
            "availableRoadLinks": []
          },
          {
            "time": 30,
            "availableRoadLinks": []
          },
          {
            "time": 30,
            "availableRoadLinks": []
          },
          {
            "time": 30,
            "availableRoadLinks": []
          }
        ]
      },
      "virtual": true
    },
    {
      "id": "intersection_1_0",
      "point": {
        "x": 0,
        "y": -300
      },
      "width": 0,
      "roads": [
        "road_1_1_3",
        "road_1_0_1"
      ],
      "roadLinks": [],
      "trafficLight": {
        "roadLinkIndices": [],
        "lightphases": [
          {
            "time": 5,
            "availableRoadLinks": []
          },
          {
            "time": 30,
            "availableRoadLinks": []
          },
          {
            "time": 30,
            "availableRoadLinks": []
          },
          {
            "time": 30,
            "availableRoadLinks": []
          },
          {
            "time": 30,
            "availableRoadLinks": []
          },
          {
            "time": 30,
            "availableRoadLinks": []
          },
          {
            "time": 30,
            "availableRoadLinks": []
          },
          {
            "time": 30,
            "availableRoadLinks": []
          },
          {
            "time": 30,
            "availableRoadLinks": []
          }
        ]
      },
      "virtual": true
    },
    {
      "id": "intersection_1_1",
      "point": {
        "x": 0,
        "y": 0
      },
      "width": 5,
      "roads": [
        "road_0_1_0",
        "road_1_0_1",
        "road_2_1_2",
        "road_1_2_3",
        "road_1_1_0",
        "road_1_1_1",
        "road_1_1_2",
        "road_1_1_3"
      ],
      "roadLinks": [
        {
          "type": "go_straight",
          "startRoad": "road_0_1_0",
          "endRoad": "road_1_1_0",
          "direction": 0,
          "laneLinks": [
            {
              "startLaneIndex": 0,
              "endLaneIndex": 0,
              "points": [
                {
                  "x": -5.0,
                  "y": -2.0
                },
                {
                  "x": -4.36,
                  "y": -2.0
                },
                {
                  "x": -3.48,
                  "y": -2.0
                },
                {
                  "x": -2.42,
                  "y": -2.0
                },
                {
                  "x": -1.24,
                  "y": -2.0
                },
                {
                  "x": 0.0,
                  "y": -2.0
                },
                {
                  "x": 1.24,
                  "y": -2.0
                },
                {
                  "x": 2.42,
                  "y": -2.0
                },
                {
                  "x": 3.48,
                  "y": -2.0
                },
                {
                  "x": 4.36,
                  "y": -2.0
                },
                {
                  "x": 5.0,
                  "y": -2.0
                }
              ]
            }
          ]
        },
        {
          "type": "go_straight",
          "startRoad": "road_1_0_1",
          "endRoad": "road_1_1_1",
          "direction": 1,
          "laneLinks": [
            {
              "startLaneIndex": 0,
              "endLaneIndex": 0,
              "points": [
                {
                  "x": 2.0,
                  "y": -5.0
                },
                {
                  "x": 2.0,
                  "y": -4.36
                },
                {
                  "x": 2.0,
                  "y": -3.48
                },
                {
                  "x": 2.0,
                  "y": -2.42
                },
                {
                  "x": 2.0,
                  "y": -1.24
                },
                {
                  "x": 2.0,
                  "y": 0.0
                },
                {
                  "x": 2.0,
                  "y": 1.24
                },
                {
                  "x": 2.0,
                  "y": 2.42
                },
                {
                  "x": 2.0,
                  "y": 3.48
                },
                {
                  "x": 2.0,
                  "y": 4.36
                },
                {
                  "x": 2.0,
                  "y": 5.0
                }
              ]
            }
          ]
        },
        {
          "type": "go_straight",
          "startRoad": "road_2_1_2",
          "endRoad": "road_1_1_2",
          "direction": 2,
          "laneLinks": [
            {
              "startLaneIndex": 0,
              "endLaneIndex": 0,
              "points": [
                {
                  "x": 5.0,
                  "y": 2.0
                },
                {
                  "x": 4.36,
                  "y": 2.0
                },
                {
                  "x": 3.48,
                  "y": 2.0
                },
                {
                  "x": 2.42,
                  "y": 2.0
                },
                {
                  "x": 1.24,
                  "y": 2.0
                },
                {
                  "x": 0.0,
                  "y": 2.0
                },
                {
                  "x": -1.24,
                  "y": 2.0
                },
                {
                  "x": -2.42,
                  "y": 2.0
                },
                {
                  "x": -3.48,
                  "y": 2.0
                },
                {
                  "x": -4.36,
                  "y": 2.0
                },
                {
                  "x": -5.0,
                  "y": 2.0
                }
              ]
            }
          ]
        },
        {
          "type": "go_straight",
          "startRoad": "road_1_2_3",
          "endRoad": "road_1_1_3",
          "direction": 3,
          "laneLinks": [
            {
              "startLaneIndex": 0,
              "endLaneIndex": 0,
              "points": [
                {
                  "x": -2.0,
                  "y": 5.0
                },
                {
                  "x": -2.0,
                  "y": 4.36
                },
                {
                  "x": -2.0,
                  "y": 3.48
                },
                {
                  "x": -2.0,
                  "y": 2.42
                },
                {
                  "x": -2.0,
                  "y": 1.24
                },
                {
                  "x": -2.0,
                  "y": 0.0
                },
                {
                  "x": -2.0,
                  "y": -1.24
                },
                {
                  "x": -2.0,
                  "y": -2.42
                },
                {
                  "x": -2.0,
                  "y": -3.48
                },
                {
                  "x": -2.0,
                  "y": -4.36
                },
                {
                  "x": -2.0,
                  "y": -5.0
                }
              ]
            }
          ]
        }
      ],
      "trafficLight": {
        "roadLinkIndices": [
          0,
          1,
          2,
          3
        ],
        "lightphases": [
          {
            "time": 5,
            "availableRoadLinks": []
          },
          {
            "time": 30,
            "availableRoadLinks": [
              0,
              2
            ]
          },
          {
            "time": 30,
            "availableRoadLinks": [
              1,
              3
            ]
          },
          {
            "time": 30,
            "availableRoadLinks": []
          },
          {
            "time": 30,
            "availableRoadLinks": []
          },
          {
            "time": 30,
            "availableRoadLinks": [
              0
            ]
          },
          {
            "time": 30,
            "availableRoadLinks": [
              2
            ]
          },
          {
            "time": 30,
            "availableRoadLinks": [
              1
            ]
          },
          {
            "time": 30,
            "availableRoadLinks": [
              3
            ]
          }
        ]
      },
      "virtual": false
    },
    {
      "id": "intersection_1_2",
      "point": {
        "x": 0,
        "y": 300
      },
      "width": 0,
      "roads": [
        "road_1_1_1",
        "road_1_2_3"
      ],
      "roadLinks": [],
      "trafficLight": {
        "roadLinkIndices": [],
        "lightphases": [
          {
            "time": 5,
            "availableRoadLinks": []
          },
          {
            "time": 30,
            "availableRoadLinks": []
          },
          {
            "time": 30,
            "availableRoadLinks": []
          },
          {
            "time": 30,
            "availableRoadLinks": []
          },
          {
            "time": 30,
            "availableRoadLinks": []
          },
          {
            "time": 30,
            "availableRoadLinks": []
          },
          {
            "time": 30,
            "availableRoadLinks": []
          },
          {
            "time": 30,
            "availableRoadLinks": []
          },
          {
            "time": 30,
            "availableRoadLinks": []
          }
        ]
      },
      "virtual": true
    },
    {
      "id": "intersection_2_0",
      "point": {
        "x": 300,
        "y": -300
      },
      "width": 0,
      "roads": [
        "road_2_1_3",
        "road_2_0_1"
      ],
      "roadLinks": [],
      "trafficLight": {
        "roadLinkIndices": [],
        "lightphases": [
          {
            "time": 5,
            "availableRoadLinks": []
          },
          {
            "time": 30,
            "availableRoadLinks": []
          },
          {
            "time": 30,
            "availableRoadLinks": []
          },
          {
            "time": 30,
            "availableRoadLinks": []
          },
          {
            "time": 30,
            "availableRoadLinks": []
          },
          {
            "time": 30,
            "availableRoadLinks": []
          },
          {
            "time": 30,
            "availableRoadLinks": []
          },
          {
            "time": 30,
            "availableRoadLinks": []
          },
          {
            "time": 30,
            "availableRoadLinks": []
          }
        ]
      },
      "virtual": true
    },
    {
      "id": "intersection_2_1",
      "point": {
        "x": 300,
        "y": 0
      },
      "width": 5,
      "roads": [
        "road_1_1_0",
        "road_2_0_1",
        "road_3_1_2",
        "road_2_2_3",
        "road_2_1_0",
        "road_2_1_1",
        "road_2_1_2",
        "road_2_1_3"
      ],
      "roadLinks": [
        {
          "type": "go_straight",
          "startRoad": "road_1_1_0",
          "endRoad": "road_2_1_0",
          "direction": 0,
          "laneLinks": [
            {
              "startLaneIndex": 0,
              "endLaneIndex": 0,
              "points": [
                {
                  "x": 295.0,
                  "y": -2.0
                },
                {
                  "x": 295.64,
                  "y": -2.0
                },
                {
                  "x": 296.52,
                  "y": -2.0
                },
                {
                  "x": 297.58,
                  "y": -2.0
                },
                {
                  "x": 298.76,
                  "y": -2.0
                },
                {
                  "x": 300.0,
                  "y": -2.0
                },
                {
                  "x": 301.24,
                  "y": -2.0
                },
                {
                  "x": 302.42,
                  "y": -2.0
                },
                {
                  "x": 303.48,
                  "y": -2.0
                },
                {
                  "x": 304.36,
                  "y": -2.0
                },
                {
                  "x": 305.0,
                  "y": -2.0
                }
              ]
            }
          ]
        },
        {
          "type": "go_straight",
          "startRoad": "road_2_0_1",
          "endRoad": "road_2_1_1",
          "direction": 1,
          "laneLinks": [
            {
              "startLaneIndex": 0,
              "endLaneIndex": 0,
              "points": [
                {
                  "x": 302.0,
                  "y": -5.0
                },
                {
                  "x": 302.0,
                  "y": -4.36
                },
                {
                  "x": 302.0,
                  "y": -3.48
                },
                {
                  "x": 302.0,
                  "y": -2.42
                },
                {
                  "x": 302.0,
                  "y": -1.24
                },
                {
                  "x": 302.0,
                  "y": 0.0
                },
                {
                  "x": 302.0,
                  "y": 1.24
                },
                {
                  "x": 302.0,
                  "y": 2.42
                },
                {
                  "x": 302.0,
                  "y": 3.48
                },
                {
                  "x": 302.0,
                  "y": 4.36
                },
                {
                  "x": 302.0,
                  "y": 5.0
                }
              ]
            }
          ]
        },
        {
          "type": "go_straight",
          "startRoad": "road_3_1_2",
          "endRoad": "road_2_1_2",
          "direction": 2,
          "laneLinks": [
            {
              "startLaneIndex": 0,
              "endLaneIndex": 0,
              "points": [
                {
                  "x": 305.0,
                  "y": 2.0
                },
                {
                  "x": 304.36,
                  "y": 2.0
                },
                {
                  "x": 303.48,
                  "y": 2.0
                },
                {
                  "x": 302.42,
                  "y": 2.0
                },
                {
                  "x": 301.24,
                  "y": 2.0
                },
                {
                  "x": 300.0,
                  "y": 2.0
                },
                {
                  "x": 298.76,
                  "y": 2.0
                },
                {
                  "x": 297.58,
                  "y": 2.0
                },
                {
                  "x": 296.52,
                  "y": 2.0
                },
                {
                  "x": 295.64,
                  "y": 2.0
                },
                {
                  "x": 295.0,
                  "y": 2.0
                }
              ]
            }
          ]
        },
        {
          "type": "go_straight",
          "startRoad": "road_2_2_3",
          "endRoad": "road_2_1_3",
          "direction": 3,
          "laneLinks": [
            {
              "startLaneIndex": 0,
              "endLaneIndex": 0,
              "points": [
                {
                  "x": 298.0,
                  "y": 5.0
                },
                {
                  "x": 298.0,
                  "y": 4.36
                },
                {
                  "x": 298.0,
                  "y": 3.48
                },
                {
                  "x": 298.0,
                  "y": 2.42
                },
                {
                  "x": 298.0,
                  "y": 1.24
                },
                {
                  "x": 298.0,
                  "y": 0.0
                },
                {
                  "x": 298.0,
                  "y": -1.24
                },
                {
                  "x": 298.0,
                  "y": -2.42
                },
                {
                  "x": 298.0,
                  "y": -3.48
                },
                {
                  "x": 298.0,
                  "y": -4.36
                },
                {
                  "x": 298.0,
                  "y": -5.0
                }
              ]
            }
          ]
        }
      ],
      "trafficLight": {
        "roadLinkIndices": [
          0,
          1,
          2,
          3
        ],
        "lightphases": [
          {
            "time": 5,
            "availableRoadLinks": []
          },
          {
            "time": 30,
            "availableRoadLinks": [
              0,
              2
            ]
          },
          {
            "time": 30,
            "availableRoadLinks": [
              1,
              3
            ]
          },
          {
            "time": 30,
            "availableRoadLinks": []
          },
          {
            "time": 30,
            "availableRoadLinks": []
          },
          {
            "time": 30,
            "availableRoadLinks": [
              0
            ]
          },
          {
            "time": 30,
            "availableRoadLinks": [
              2
            ]
          },
          {
            "time": 30,
            "availableRoadLinks": [
              1
            ]
          },
          {
            "time": 30,
            "availableRoadLinks": [
              3
            ]
          }
        ]
      },
      "virtual": false
    },
    {
      "id": "intersection_2_2",
      "point": {
        "x": 300,
        "y": 300
      },
      "width": 0,
      "roads": [
        "road_2_1_1",
        "road_2_2_3"
      ],
      "roadLinks": [],
      "trafficLight": {
        "roadLinkIndices": [],
        "lightphases": [
          {
            "time": 5,
            "availableRoadLinks": []
          },
          {
            "time": 30,
            "availableRoadLinks": []
          },
          {
            "time": 30,
            "availableRoadLinks": []
          },
          {
            "time": 30,
            "availableRoadLinks": []
          },
          {
            "time": 30,
            "availableRoadLinks": []
          },
          {
            "time": 30,
            "availableRoadLinks": []
          },
          {
            "time": 30,
            "availableRoadLinks": []
          },
          {
            "time": 30,
            "availableRoadLinks": []
          },
          {
            "time": 30,
            "availableRoadLinks": []
          }
        ]
      },
      "virtual": true
    },
    {
      "id": "intersection_3_0",
      "point": {
        "x": 600,
        "y": -300
      },
      "width": 0,
      "roads": [
        "road_3_1_3",
        "road_3_0_1"
      ],
      "roadLinks": [],
      "trafficLight": {
        "roadLinkIndices": [],
        "lightphases": [
          {
            "time": 5,
            "availableRoadLinks": []
          },
          {
            "time": 30,
            "availableRoadLinks": []
          },
          {
            "time": 30,
            "availableRoadLinks": []
          },
          {
            "time": 30,
            "availableRoadLinks": []
          },
          {
            "time": 30,
            "availableRoadLinks": []
          },
          {
            "time": 30,
            "availableRoadLinks": []
          },
          {
            "time": 30,
            "availableRoadLinks": []
          },
          {
            "time": 30,
            "availableRoadLinks": []
          },
          {
            "time": 30,
            "availableRoadLinks": []
          }
        ]
      },
      "virtual": true
    },
    {
      "id": "intersection_3_1",
      "point": {
        "x": 600,
        "y": 0
      },
      "width": 5,
      "roads": [
        "road_2_1_0",
        "road_3_0_1",
        "road_4_1_2",
        "road_3_2_3",
        "road_3_1_0",
        "road_3_1_1",
        "road_3_1_2",
        "road_3_1_3"
      ],
      "roadLinks": [
        {
          "type": "go_straight",
          "startRoad": "road_2_1_0",
          "endRoad": "road_3_1_0",
          "direction": 0,
          "laneLinks": [
            {
              "startLaneIndex": 0,
              "endLaneIndex": 0,
              "points": [
                {
                  "x": 595.0,
                  "y": -2.0
                },
                {
                  "x": 595.64,
                  "y": -2.0
                },
                {
                  "x": 596.52,
                  "y": -2.0
                },
                {
                  "x": 597.58,
                  "y": -2.0
                },
                {
                  "x": 598.76,
                  "y": -2.0
                },
                {
                  "x": 600.0,
                  "y": -2.0
                },
                {
                  "x": 601.24,
                  "y": -2.0
                },
                {
                  "x": 602.42,
                  "y": -2.0
                },
                {
                  "x": 603.4799999999999,
                  "y": -2.0
                },
                {
                  "x": 604.36,
                  "y": -2.0
                },
                {
                  "x": 605.0,
                  "y": -2.0
                }
              ]
            }
          ]
        },
        {
          "type": "go_straight",
          "startRoad": "road_3_0_1",
          "endRoad": "road_3_1_1",
          "direction": 1,
          "laneLinks": [
            {
              "startLaneIndex": 0,
              "endLaneIndex": 0,
              "points": [
                {
                  "x": 602.0,
                  "y": -5.0
                },
                {
                  "x": 602.0,
                  "y": -4.36
                },
                {
                  "x": 602.0,
                  "y": -3.48
                },
                {
                  "x": 602.0,
                  "y": -2.42
                },
                {
                  "x": 602.0,
                  "y": -1.24
                },
                {
                  "x": 602.0,
                  "y": 0.0
                },
                {
                  "x": 602.0,
                  "y": 1.24
                },
                {
                  "x": 602.0,
                  "y": 2.42
                },
                {
                  "x": 601.9999999999999,
                  "y": 3.48
                },
                {
                  "x": 602.0,
                  "y": 4.36
                },
                {
                  "x": 602.0,
                  "y": 5.0
                }
              ]
            }
          ]
        },
        {
          "type": "go_straight",
          "startRoad": "road_4_1_2",
          "endRoad": "road_3_1_2",
          "direction": 2,
          "laneLinks": [
            {
              "startLaneIndex": 0,
              "endLaneIndex": 0,
              "points": [
                {
                  "x": 605.0,
                  "y": 2.0
                },
                {
                  "x": 604.36,
                  "y": 2.0
                },
                {
                  "x": 603.48,
                  "y": 2.0
                },
                {
                  "x": 602.42,
                  "y": 2.0
                },
                {
                  "x": 601.24,
                  "y": 2.0
                },
                {
                  "x": 600.0,
                  "y": 2.0
                },
                {
                  "x": 598.76,
                  "y": 2.0
                },
                {
                  "x": 597.58,
                  "y": 2.0
                },
                {
                  "x": 596.5199999999999,
                  "y": 2.0
                },
                {
                  "x": 595.64,
                  "y": 2.0
                },
                {
                  "x": 595.0,
                  "y": 2.0
                }
              ]
            }
          ]
        },
        {
          "type": "go_straight",
          "startRoad": "road_3_2_3",
          "endRoad": "road_3_1_3",
          "direction": 3,
          "laneLinks": [
            {
              "startLaneIndex": 0,
              "endLaneIndex": 0,
              "points": [
                {
                  "x": 598.0,
                  "y": 5.0
                },
                {
                  "x": 598.0,
                  "y": 4.36
                },
                {
                  "x": 598.0,
                  "y": 3.48
                },
                {
                  "x": 598.0,
                  "y": 2.42
                },
                {
                  "x": 598.0,
                  "y": 1.24
                },
                {
                  "x": 598.0,
                  "y": 0.0
                },
                {
                  "x": 598.0,
                  "y": -1.24
                },
                {
                  "x": 598.0,
                  "y": -2.42
                },
                {
                  "x": 597.9999999999999,
                  "y": -3.48
                },
                {
                  "x": 598.0,
                  "y": -4.36
                },
                {
                  "x": 598.0,
                  "y": -5.0
                }
              ]
            }
          ]
        }
      ],
      "trafficLight": {
        "roadLinkIndices": [
          0,
          1,
          2,
          3
        ],
        "lightphases": [
          {
            "time": 5,
            "availableRoadLinks": []
          },
          {
            "time": 30,
            "availableRoadLinks": [
              0,
              2
            ]
          },
          {
            "time": 30,
            "availableRoadLinks": [
              1,
              3
            ]
          },
          {
            "time": 30,
            "availableRoadLinks": []
          },
          {
            "time": 30,
            "availableRoadLinks": []
          },
          {
            "time": 30,
            "availableRoadLinks": [
              0
            ]
          },
          {
            "time": 30,
            "availableRoadLinks": [
              2
            ]
          },
          {
            "time": 30,
            "availableRoadLinks": [
              1
            ]
          },
          {
            "time": 30,
            "availableRoadLinks": [
              3
            ]
          }
        ]
      },
      "virtual": false
    },
    {
      "id": "intersection_3_2",
      "point": {
        "x": 600,
        "y": 300
      },
      "width": 0,
      "roads": [
        "road_3_1_1",
        "road_3_2_3"
      ],
      "roadLinks": [],
      "trafficLight": {
        "roadLinkIndices": [],
        "lightphases": [
          {
            "time": 5,
            "availableRoadLinks": []
          },
          {
            "time": 30,
            "availableRoadLinks": []
          },
          {
            "time": 30,
            "availableRoadLinks": []
          },
          {
            "time": 30,
            "availableRoadLinks": []
          },
          {
            "time": 30,
            "availableRoadLinks": []
          },
          {
            "time": 30,
            "availableRoadLinks": []
          },
          {
            "time": 30,
            "availableRoadLinks": []
          },
          {
            "time": 30,
            "availableRoadLinks": []
          },
          {
            "time": 30,
            "availableRoadLinks": []
          }
        ]
      },
      "virtual": true
    },
    {
      "id": "intersection_4_0",
      "point": {
        "x": 900,
        "y": -300
      },
      "width": 0,
      "roads": [
        "road_4_1_3",
        "road_4_0_1"
      ],
      "roadLinks": [],
      "trafficLight": {
        "roadLinkIndices": [],
        "lightphases": [
          {
            "time": 5,
            "availableRoadLinks": []
          },
          {
            "time": 30,
            "availableRoadLinks": []
          },
          {
            "time": 30,
            "availableRoadLinks": []
          },
          {
            "time": 30,
            "availableRoadLinks": []
          },
          {
            "time": 30,
            "availableRoadLinks": []
          },
          {
            "time": 30,
            "availableRoadLinks": []
          },
          {
            "time": 30,
            "availableRoadLinks": []
          },
          {
            "time": 30,
            "availableRoadLinks": []
          },
          {
            "time": 30,
            "availableRoadLinks": []
          }
        ]
      },
      "virtual": true
    },
    {
      "id": "intersection_4_1",
      "point": {
        "x": 900,
        "y": 0
      },
      "width": 5,
      "roads": [
        "road_3_1_0",
        "road_4_0_1",
        "road_5_1_2",
        "road_4_2_3",
        "road_4_1_0",
        "road_4_1_1",
        "road_4_1_2",
        "road_4_1_3"
      ],
      "roadLinks": [
        {
          "type": "go_straight",
          "startRoad": "road_3_1_0",
          "endRoad": "road_4_1_0",
          "direction": 0,
          "laneLinks": [
            {
              "startLaneIndex": 0,
              "endLaneIndex": 0,
              "points": [
                {
                  "x": 895.0,
                  "y": -2.0
                },
                {
                  "x": 895.64,
                  "y": -2.0
                },
                {
                  "x": 896.52,
                  "y": -2.0
                },
                {
                  "x": 897.58,
                  "y": -2.0
                },
                {
                  "x": 898.76,
                  "y": -2.0
                },
                {
                  "x": 900.0,
                  "y": -2.0
                },
                {
                  "x": 901.24,
                  "y": -2.0
                },
                {
                  "x": 902.42,
                  "y": -2.0
                },
                {
                  "x": 903.4799999999999,
                  "y": -2.0
                },
                {
                  "x": 904.36,
                  "y": -2.0
                },
                {
                  "x": 905.0,
                  "y": -2.0
                }
              ]
            }
          ]
        },
        {
          "type": "go_straight",
          "startRoad": "road_4_0_1",
          "endRoad": "road_4_1_1",
          "direction": 1,
          "laneLinks": [
            {
              "startLaneIndex": 0,
              "endLaneIndex": 0,
              "points": [
                {
                  "x": 902.0,
                  "y": -5.0
                },
                {
                  "x": 902.0,
                  "y": -4.36
                },
                {
                  "x": 902.0,
                  "y": -3.48
                },
                {
                  "x": 902.0,
                  "y": -2.42
                },
                {
                  "x": 902.0,
                  "y": -1.24
                },
                {
                  "x": 902.0,
                  "y": 0.0
                },
                {
                  "x": 902.0,
                  "y": 1.24
                },
                {
                  "x": 902.0,
                  "y": 2.42
                },
                {
                  "x": 901.9999999999999,
                  "y": 3.48
                },
                {
                  "x": 902.0,
                  "y": 4.36
                },
                {
                  "x": 902.0,
                  "y": 5.0
                }
              ]
            }
          ]
        },
        {
          "type": "go_straight",
          "startRoad": "road_5_1_2",
          "endRoad": "road_4_1_2",
          "direction": 2,
          "laneLinks": [
            {
              "startLaneIndex": 0,
              "endLaneIndex": 0,
              "points": [
                {
                  "x": 905.0,
                  "y": 2.0
                },
                {
                  "x": 904.36,
                  "y": 2.0
                },
                {
                  "x": 903.48,
                  "y": 2.0
                },
                {
                  "x": 902.42,
                  "y": 2.0
                },
                {
                  "x": 901.24,
                  "y": 2.0
                },
                {
                  "x": 900.0,
                  "y": 2.0
                },
                {
                  "x": 898.76,
                  "y": 2.0
                },
                {
                  "x": 897.58,
                  "y": 2.0
                },
                {
                  "x": 896.5199999999999,
                  "y": 2.0
                },
                {
                  "x": 895.64,
                  "y": 2.0
                },
                {
                  "x": 895.0,
                  "y": 2.0
                }
              ]
            }
          ]
        },
        {
          "type": "go_straight",
          "startRoad": "road_4_2_3",
          "endRoad": "road_4_1_3",
          "direction": 3,
          "laneLinks": [
            {
              "startLaneIndex": 0,
              "endLaneIndex": 0,
              "points": [
                {
                  "x": 898.0,
                  "y": 5.0
                },
                {
                  "x": 898.0,
                  "y": 4.36
                },
                {
                  "x": 898.0,
                  "y": 3.48
                },
                {
                  "x": 898.0,
                  "y": 2.42
                },
                {
                  "x": 898.0,
                  "y": 1.24
                },
                {
                  "x": 898.0,
                  "y": 0.0
                },
                {
                  "x": 898.0,
                  "y": -1.24
                },
                {
                  "x": 898.0,
                  "y": -2.42
                },
                {
                  "x": 897.9999999999999,
                  "y": -3.48
                },
                {
                  "x": 898.0,
                  "y": -4.36
                },
                {
                  "x": 898.0,
                  "y": -5.0
                }
              ]
            }
          ]
        }
      ],
      "trafficLight": {
        "roadLinkIndices": [
          0,
          1,
          2,
          3
        ],
        "lightphases": [
          {
            "time": 5,
            "availableRoadLinks": []
          },
          {
            "time": 30,
            "availableRoadLinks": [
              0,
              2
            ]
          },
          {
            "time": 30,
            "availableRoadLinks": [
              1,
              3
            ]
          },
          {
            "time": 30,
            "availableRoadLinks": []
          },
          {
            "time": 30,
            "availableRoadLinks": []
          },
          {
            "time": 30,
            "availableRoadLinks": [
              0
            ]
          },
          {
            "time": 30,
            "availableRoadLinks": [
              2
            ]
          },
          {
            "time": 30,
            "availableRoadLinks": [
              1
            ]
          },
          {
            "time": 30,
            "availableRoadLinks": [
              3
            ]
          }
        ]
      },
      "virtual": false
    },
    {
      "id": "intersection_4_2",
      "point": {
        "x": 900,
        "y": 300
      },
      "width": 0,
      "roads": [
        "road_4_1_1",
        "road_4_2_3"
      ],
      "roadLinks": [],
      "trafficLight": {
        "roadLinkIndices": [],
        "lightphases": [
          {
            "time": 5,
            "availableRoadLinks": []
          },
          {
            "time": 30,
            "availableRoadLinks": []
          },
          {
            "time": 30,
            "availableRoadLinks": []
          },
          {
            "time": 30,
            "availableRoadLinks": []
          },
          {
            "time": 30,
            "availableRoadLinks": []
          },
          {
            "time": 30,
            "availableRoadLinks": []
          },
          {
            "time": 30,
            "availableRoadLinks": []
          },
          {
            "time": 30,
            "availableRoadLinks": []
          },
          {
            "time": 30,
            "availableRoadLinks": []
          }
        ]
      },
      "virtual": true
    },
    {
      "id": "intersection_5_0",
      "point": {
        "x": 1200,
        "y": -300
      },
      "width": 0,
      "roads": [
        "road_5_1_3",
        "road_5_0_1"
      ],
      "roadLinks": [],
      "trafficLight": {
        "roadLinkIndices": [],
        "lightphases": [
          {
            "time": 5,
            "availableRoadLinks": []
          },
          {
            "time": 30,
            "availableRoadLinks": []
          },
          {
            "time": 30,
            "availableRoadLinks": []
          },
          {
            "time": 30,
            "availableRoadLinks": []
          },
          {
            "time": 30,
            "availableRoadLinks": []
          },
          {
            "time": 30,
            "availableRoadLinks": []
          },
          {
            "time": 30,
            "availableRoadLinks": []
          },
          {
            "time": 30,
            "availableRoadLinks": []
          },
          {
            "time": 30,
            "availableRoadLinks": []
          }
        ]
      },
      "virtual": true
    },
    {
      "id": "intersection_5_1",
      "point": {
        "x": 1200,
        "y": 0
      },
      "width": 5,
      "roads": [
        "road_4_1_0",
        "road_5_0_1",
        "road_6_1_2",
        "road_5_2_3",
        "road_5_1_0",
        "road_5_1_1",
        "road_5_1_2",
        "road_5_1_3"
      ],
      "roadLinks": [
        {
          "type": "go_straight",
          "startRoad": "road_4_1_0",
          "endRoad": "road_5_1_0",
          "direction": 0,
          "laneLinks": [
            {
              "startLaneIndex": 0,
              "endLaneIndex": 0,
              "points": [
                {
                  "x": 1195.0,
                  "y": -2.0
                },
                {
                  "x": 1195.6399999999999,
                  "y": -2.0
                },
                {
                  "x": 1196.52,
                  "y": -2.0
                },
                {
                  "x": 1197.58,
                  "y": -2.0
                },
                {
                  "x": 1198.76,
                  "y": -2.0
                },
                {
                  "x": 1200.0,
                  "y": -2.0
                },
                {
                  "x": 1201.24,
                  "y": -2.0
                },
                {
                  "x": 1202.42,
                  "y": -2.0
                },
                {
                  "x": 1203.48,
                  "y": -2.0
                },
                {
                  "x": 1204.36,
                  "y": -2.0
                },
                {
                  "x": 1205.0,
                  "y": -2.0
                }
              ]
            }
          ]
        },
        {
          "type": "go_straight",
          "startRoad": "road_5_0_1",
          "endRoad": "road_5_1_1",
          "direction": 1,
          "laneLinks": [
            {
              "startLaneIndex": 0,
              "endLaneIndex": 0,
              "points": [
                {
                  "x": 1202.0,
                  "y": -5.0
                },
                {
                  "x": 1202.0,
                  "y": -4.36
                },
                {
                  "x": 1202.0,
                  "y": -3.48
                },
                {
                  "x": 1202.0,
                  "y": -2.42
                },
                {
                  "x": 1202.0,
                  "y": -1.24
                },
                {
                  "x": 1202.0,
                  "y": 0.0
                },
                {
                  "x": 1202.0,
                  "y": 1.24
                },
                {
                  "x": 1202.0,
                  "y": 2.42
                },
                {
                  "x": 1202.0,
                  "y": 3.48
                },
                {
                  "x": 1202.0,
                  "y": 4.36
                },
                {
                  "x": 1202.0,
                  "y": 5.0
                }
              ]
            }
          ]
        },
        {
          "type": "go_straight",
          "startRoad": "road_6_1_2",
          "endRoad": "road_5_1_2",
          "direction": 2,
          "laneLinks": [
            {
              "startLaneIndex": 0,
              "endLaneIndex": 0,
              "points": [
                {
                  "x": 1205.0,
                  "y": 2.0
                },
                {
                  "x": 1204.36,
                  "y": 2.0
                },
                {
                  "x": 1203.48,
                  "y": 2.0
                },
                {
                  "x": 1202.42,
                  "y": 2.0
                },
                {
                  "x": 1201.24,
                  "y": 2.0
                },
                {
                  "x": 1200.0,
                  "y": 2.0
                },
                {
                  "x": 1198.76,
                  "y": 2.0
                },
                {
                  "x": 1197.58,
                  "y": 2.0
                },
                {
                  "x": 1196.52,
                  "y": 2.0
                },
                {
                  "x": 1195.6399999999999,
                  "y": 2.0
                },
                {
                  "x": 1195.0,
                  "y": 2.0
                }
              ]
            }
          ]
        },
        {
          "type": "go_straight",
          "startRoad": "road_5_2_3",
          "endRoad": "road_5_1_3",
          "direction": 3,
          "laneLinks": [
            {
              "startLaneIndex": 0,
              "endLaneIndex": 0,
              "points": [
                {
                  "x": 1198.0,
                  "y": 5.0
                },
                {
                  "x": 1198.0,
                  "y": 4.36
                },
                {
                  "x": 1198.0,
                  "y": 3.48
                },
                {
                  "x": 1198.0,
                  "y": 2.42
                },
                {
                  "x": 1198.0,
                  "y": 1.24
                },
                {
                  "x": 1198.0,
                  "y": 0.0
                },
                {
                  "x": 1198.0,
                  "y": -1.24
                },
                {
                  "x": 1198.0,
                  "y": -2.42
                },
                {
                  "x": 1198.0,
                  "y": -3.48
                },
                {
                  "x": 1198.0,
                  "y": -4.36
                },
                {
                  "x": 1198.0,
                  "y": -5.0
                }
              ]
            }
          ]
        }
      ],
      "trafficLight": {
        "roadLinkIndices": [
          0,
          1,
          2,
          3
        ],
        "lightphases": [
          {
            "time": 5,
            "availableRoadLinks": []
          },
          {
            "time": 30,
            "availableRoadLinks": [
              0,
              2
            ]
          },
          {
            "time": 30,
            "availableRoadLinks": [
              1,
              3
            ]
          },
          {
            "time": 30,
            "availableRoadLinks": []
          },
          {
            "time": 30,
            "availableRoadLinks": []
          },
          {
            "time": 30,
            "availableRoadLinks": [
              0
            ]
          },
          {
            "time": 30,
            "availableRoadLinks": [
              2
            ]
          },
          {
            "time": 30,
            "availableRoadLinks": [
              1
            ]
          },
          {
            "time": 30,
            "availableRoadLinks": [
              3
            ]
          }
        ]
      },
      "virtual": false
    },
    {
      "id": "intersection_5_2",
      "point": {
        "x": 1200,
        "y": 300
      },
      "width": 0,
      "roads": [
        "road_5_1_1",
        "road_5_2_3"
      ],
      "roadLinks": [],
      "trafficLight": {
        "roadLinkIndices": [],
        "lightphases": [
          {
            "time": 5,
            "availableRoadLinks": []
          },
          {
            "time": 30,
            "availableRoadLinks": []
          },
          {
            "time": 30,
            "availableRoadLinks": []
          },
          {
            "time": 30,
            "availableRoadLinks": []
          },
          {
            "time": 30,
            "availableRoadLinks": []
          },
          {
            "time": 30,
            "availableRoadLinks": []
          },
          {
            "time": 30,
            "availableRoadLinks": []
          },
          {
            "time": 30,
            "availableRoadLinks": []
          },
          {
            "time": 30,
            "availableRoadLinks": []
          }
        ]
      },
      "virtual": true
    },
    {
      "id": "intersection_6_0",
      "point": {
        "x": 1500,
        "y": -300
      },
      "width": 0,
      "roads": [
        "road_6_1_3",
        "road_6_0_1"
      ],
      "roadLinks": [],
      "trafficLight": {
        "roadLinkIndices": [],
        "lightphases": [
          {
            "time": 5,
            "availableRoadLinks": []
          },
          {
            "time": 30,
            "availableRoadLinks": []
          },
          {
            "time": 30,
            "availableRoadLinks": []
          },
          {
            "time": 30,
            "availableRoadLinks": []
          },
          {
            "time": 30,
            "availableRoadLinks": []
          },
          {
            "time": 30,
            "availableRoadLinks": []
          },
          {
            "time": 30,
            "availableRoadLinks": []
          },
          {
            "time": 30,
            "availableRoadLinks": []
          },
          {
            "time": 30,
            "availableRoadLinks": []
          }
        ]
      },
      "virtual": true
    },
    {
      "id": "intersection_6_1",
      "point": {
        "x": 1500,
        "y": 0
      },
      "width": 5,
      "roads": [
        "road_5_1_0",
        "road_6_0_1",
        "road_7_1_2",
        "road_6_2_3",
        "road_6_1_0",
        "road_6_1_1",
        "road_6_1_2",
        "road_6_1_3"
      ],
      "roadLinks": [
        {
          "type": "go_straight",
          "startRoad": "road_5_1_0",
          "endRoad": "road_6_1_0",
          "direction": 0,
          "laneLinks": [
            {
              "startLaneIndex": 0,
              "endLaneIndex": 0,
              "points": [
                {
                  "x": 1495.0,
                  "y": -2.0
                },
                {
                  "x": 1495.6399999999999,
                  "y": -2.0
                },
                {
                  "x": 1496.52,
                  "y": -2.0
                },
                {
                  "x": 1497.58,
                  "y": -2.0
                },
                {
                  "x": 1498.76,
                  "y": -2.0
                },
                {
                  "x": 1500.0,
                  "y": -2.0
                },
                {
                  "x": 1501.24,
                  "y": -2.0
                },
                {
                  "x": 1502.42,
                  "y": -2.0
                },
                {
                  "x": 1503.48,
                  "y": -2.0
                },
                {
                  "x": 1504.36,
                  "y": -2.0
                },
                {
                  "x": 1505.0,
                  "y": -2.0
                }
              ]
            }
          ]
        },
        {
          "type": "go_straight",
          "startRoad": "road_6_0_1",
          "endRoad": "road_6_1_1",
          "direction": 1,
          "laneLinks": [
            {
              "startLaneIndex": 0,
              "endLaneIndex": 0,
              "points": [
                {
                  "x": 1502.0,
                  "y": -5.0
                },
                {
                  "x": 1502.0,
                  "y": -4.36
                },
                {
                  "x": 1502.0,
                  "y": -3.48
                },
                {
                  "x": 1502.0,
                  "y": -2.42
                },
                {
                  "x": 1502.0,
                  "y": -1.24
                },
                {
                  "x": 1502.0,
                  "y": 0.0
                },
                {
                  "x": 1502.0,
                  "y": 1.24
                },
                {
                  "x": 1502.0,
                  "y": 2.42
                },
                {
                  "x": 1502.0,
                  "y": 3.48
                },
                {
                  "x": 1502.0,
                  "y": 4.36
                },
                {
                  "x": 1502.0,
                  "y": 5.0
                }
              ]
            }
          ]
        },
        {
          "type": "go_straight",
          "startRoad": "road_7_1_2",
          "endRoad": "road_6_1_2",
          "direction": 2,
          "laneLinks": [
            {
              "startLaneIndex": 0,
              "endLaneIndex": 0,
              "points": [
                {
                  "x": 1505.0,
                  "y": 2.0
                },
                {
                  "x": 1504.36,
                  "y": 2.0
                },
                {
                  "x": 1503.48,
                  "y": 2.0
                },
                {
                  "x": 1502.42,
                  "y": 2.0
                },
                {
                  "x": 1501.24,
                  "y": 2.0
                },
                {
                  "x": 1500.0,
                  "y": 2.0
                },
                {
                  "x": 1498.76,
                  "y": 2.0
                },
                {
                  "x": 1497.58,
                  "y": 2.0
                },
                {
                  "x": 1496.52,
                  "y": 2.0
                },
                {
                  "x": 1495.6399999999999,
                  "y": 2.0
                },
                {
                  "x": 1495.0,
                  "y": 2.0
                }
              ]
            }
          ]
        },
        {
          "type": "go_straight",
          "startRoad": "road_6_2_3",
          "endRoad": "road_6_1_3",
          "direction": 3,
          "laneLinks": [
            {
              "startLaneIndex": 0,
              "endLaneIndex": 0,
              "points": [
                {
                  "x": 1498.0,
                  "y": 5.0
                },
                {
                  "x": 1498.0,
                  "y": 4.36
                },
                {
                  "x": 1498.0,
                  "y": 3.48
                },
                {
                  "x": 1498.0,
                  "y": 2.42
                },
                {
                  "x": 1498.0,
                  "y": 1.24
                },
                {
                  "x": 1498.0,
                  "y": 0.0
                },
                {
                  "x": 1498.0,
                  "y": -1.24
                },
                {
                  "x": 1498.0,
                  "y": -2.42
                },
                {
                  "x": 1498.0,
                  "y": -3.48
                },
                {
                  "x": 1498.0,
                  "y": -4.36
                },
                {
                  "x": 1498.0,
                  "y": -5.0
                }
              ]
            }
          ]
        }
      ],
      "trafficLight": {
        "roadLinkIndices": [
          0,
          1,
          2,
          3
        ],
        "lightphases": [
          {
            "time": 5,
            "availableRoadLinks": []
          },
          {
            "time": 30,
            "availableRoadLinks": [
              0,
              2
            ]
          },
          {
            "time": 30,
            "availableRoadLinks": [
              1,
              3
            ]
          },
          {
            "time": 30,
            "availableRoadLinks": []
          },
          {
            "time": 30,
            "availableRoadLinks": []
          },
          {
            "time": 30,
            "availableRoadLinks": [
              0
            ]
          },
          {
            "time": 30,
            "availableRoadLinks": [
              2
            ]
          },
          {
            "time": 30,
            "availableRoadLinks": [
              1
            ]
          },
          {
            "time": 30,
            "availableRoadLinks": [
              3
            ]
          }
        ]
      },
      "virtual": false
    },
    {
      "id": "intersection_6_2",
      "point": {
        "x": 1500,
        "y": 300
      },
      "width": 0,
      "roads": [
        "road_6_1_1",
        "road_6_2_3"
      ],
      "roadLinks": [],
      "trafficLight": {
        "roadLinkIndices": [],
        "lightphases": [
          {
            "time": 5,
            "availableRoadLinks": []
          },
          {
            "time": 30,
            "availableRoadLinks": []
          },
          {
            "time": 30,
            "availableRoadLinks": []
          },
          {
            "time": 30,
            "availableRoadLinks": []
          },
          {
            "time": 30,
            "availableRoadLinks": []
          },
          {
            "time": 30,
            "availableRoadLinks": []
          },
          {
            "time": 30,
            "availableRoadLinks": []
          },
          {
            "time": 30,
            "availableRoadLinks": []
          },
          {
            "time": 30,
            "availableRoadLinks": []
          }
        ]
      },
      "virtual": true
    },
    {
      "id": "intersection_7_0",
      "point": {
        "x": 1800,
        "y": -300
      },
      "width": 0,
      "roads": [
        "road_7_1_3",
        "road_7_0_1"
      ],
      "roadLinks": [],
      "trafficLight": {
        "roadLinkIndices": [],
        "lightphases": [
          {
            "time": 5,
            "availableRoadLinks": []
          },
          {
            "time": 30,
            "availableRoadLinks": []
          },
          {
            "time": 30,
            "availableRoadLinks": []
          },
          {
            "time": 30,
            "availableRoadLinks": []
          },
          {
            "time": 30,
            "availableRoadLinks": []
          },
          {
            "time": 30,
            "availableRoadLinks": []
          },
          {
            "time": 30,
            "availableRoadLinks": []
          },
          {
            "time": 30,
            "availableRoadLinks": []
          },
          {
            "time": 30,
            "availableRoadLinks": []
          }
        ]
      },
      "virtual": true
    },
    {
      "id": "intersection_7_1",
      "point": {
        "x": 1800,
        "y": 0
      },
      "width": 5,
      "roads": [
        "road_6_1_0",
        "road_7_0_1",
        "road_8_1_2",
        "road_7_2_3",
        "road_7_1_0",
        "road_7_1_1",
        "road_7_1_2",
        "road_7_1_3"
      ],
      "roadLinks": [
        {
          "type": "go_straight",
          "startRoad": "road_6_1_0",
          "endRoad": "road_7_1_0",
          "direction": 0,
          "laneLinks": [
            {
              "startLaneIndex": 0,
              "endLaneIndex": 0,
              "points": [
                {
                  "x": 1795.0,
                  "y": -2.0
                },
                {
                  "x": 1795.6399999999999,
                  "y": -2.0
                },
                {
                  "x": 1796.52,
                  "y": -2.0
                },
                {
                  "x": 1797.58,
                  "y": -2.0
                },
                {
                  "x": 1798.76,
                  "y": -2.0
                },
                {
                  "x": 1800.0,
                  "y": -2.0
                },
                {
                  "x": 1801.24,
                  "y": -2.0
                },
                {
                  "x": 1802.42,
                  "y": -2.0
                },
                {
                  "x": 1803.48,
                  "y": -2.0
                },
                {
                  "x": 1804.3600000000001,
                  "y": -2.0
                },
                {
                  "x": 1805.0,
                  "y": -2.0
                }
              ]
            }
          ]
        },
        {
          "type": "go_straight",
          "startRoad": "road_7_0_1",
          "endRoad": "road_7_1_1",
          "direction": 1,
          "laneLinks": [
            {
              "startLaneIndex": 0,
              "endLaneIndex": 0,
              "points": [
                {
                  "x": 1802.0,
                  "y": -5.0
                },
                {
                  "x": 1802.0,
                  "y": -4.36
                },
                {
                  "x": 1802.0,
                  "y": -3.48
                },
                {
                  "x": 1802.0,
                  "y": -2.42
                },
                {
                  "x": 1802.0,
                  "y": -1.24
                },
                {
                  "x": 1802.0,
                  "y": 0.0
                },
                {
                  "x": 1802.0,
                  "y": 1.24
                },
                {
                  "x": 1802.0,
                  "y": 2.42
                },
                {
                  "x": 1802.0,
                  "y": 3.48
                },
                {
                  "x": 1802.0,
                  "y": 4.36
                },
                {
                  "x": 1802.0,
                  "y": 5.0
                }
              ]
            }
          ]
        },
        {
          "type": "go_straight",
          "startRoad": "road_8_1_2",
          "endRoad": "road_7_1_2",
          "direction": 2,
          "laneLinks": [
            {
              "startLaneIndex": 0,
              "endLaneIndex": 0,
              "points": [
                {
                  "x": 1805.0,
                  "y": 2.0
                },
                {
                  "x": 1804.36,
                  "y": 2.0
                },
                {
                  "x": 1803.48,
                  "y": 2.0
                },
                {
                  "x": 1802.42,
                  "y": 2.0
                },
                {
                  "x": 1801.24,
                  "y": 2.0
                },
                {
                  "x": 1800.0,
                  "y": 2.0
                },
                {
                  "x": 1798.76,
                  "y": 2.0
                },
                {
                  "x": 1797.58,
                  "y": 2.0
                },
                {
                  "x": 1796.52,
                  "y": 2.0
                },
                {
                  "x": 1795.6399999999999,
                  "y": 2.0
                },
                {
                  "x": 1795.0,
                  "y": 2.0
                }
              ]
            }
          ]
        },
        {
          "type": "go_straight",
          "startRoad": "road_7_2_3",
          "endRoad": "road_7_1_3",
          "direction": 3,
          "laneLinks": [
            {
              "startLaneIndex": 0,
              "endLaneIndex": 0,
              "points": [
                {
                  "x": 1798.0,
                  "y": 5.0
                },
                {
                  "x": 1798.0,
                  "y": 4.36
                },
                {
                  "x": 1798.0,
                  "y": 3.48
                },
                {
                  "x": 1798.0,
                  "y": 2.42
                },
                {
                  "x": 1798.0,
                  "y": 1.24
                },
                {
                  "x": 1798.0,
                  "y": 0.0
                },
                {
                  "x": 1798.0,
                  "y": -1.24
                },
                {
                  "x": 1798.0,
                  "y": -2.42
                },
                {
                  "x": 1798.0,
                  "y": -3.48
                },
                {
                  "x": 1798.0,
                  "y": -4.36
                },
                {
                  "x": 1798.0,
                  "y": -5.0
                }
              ]
            }
          ]
        }
      ],
      "trafficLight": {
        "roadLinkIndices": [
          0,
          1,
          2,
          3
        ],
        "lightphases": [
          {
            "time": 5,
            "availableRoadLinks": []
          },
          {
            "time": 30,
            "availableRoadLinks": [
              0,
              2
            ]
          },
          {
            "time": 30,
            "availableRoadLinks": [
              1,
              3
            ]
          },
          {
            "time": 30,
            "availableRoadLinks": []
          },
          {
            "time": 30,
            "availableRoadLinks": []
          },
          {
            "time": 30,
            "availableRoadLinks": [
              0
            ]
          },
          {
            "time": 30,
            "availableRoadLinks": [
              2
            ]
          },
          {
            "time": 30,
            "availableRoadLinks": [
              1
            ]
          },
          {
            "time": 30,
            "availableRoadLinks": [
              3
            ]
          }
        ]
      },
      "virtual": false
    },
    {
      "id": "intersection_7_2",
      "point": {
        "x": 1800,
        "y": 300
      },
      "width": 0,
      "roads": [
        "road_7_1_1",
        "road_7_2_3"
      ],
      "roadLinks": [],
      "trafficLight": {
        "roadLinkIndices": [],
        "lightphases": [
          {
            "time": 5,
            "availableRoadLinks": []
          },
          {
            "time": 30,
            "availableRoadLinks": []
          },
          {
            "time": 30,
            "availableRoadLinks": []
          },
          {
            "time": 30,
            "availableRoadLinks": []
          },
          {
            "time": 30,
            "availableRoadLinks": []
          },
          {
            "time": 30,
            "availableRoadLinks": []
          },
          {
            "time": 30,
            "availableRoadLinks": []
          },
          {
            "time": 30,
            "availableRoadLinks": []
          },
          {
            "time": 30,
            "availableRoadLinks": []
          }
        ]
      },
      "virtual": true
    },
    {
      "id": "intersection_8_0",
      "point": {
        "x": 2100,
        "y": -300
      },
      "width": 0,
      "roads": [
        "road_8_1_3",
        "road_8_0_1"
      ],
      "roadLinks": [],
      "trafficLight": {
        "roadLinkIndices": [],
        "lightphases": [
          {
            "time": 5,
            "availableRoadLinks": []
          },
          {
            "time": 30,
            "availableRoadLinks": []
          },
          {
            "time": 30,
            "availableRoadLinks": []
          },
          {
            "time": 30,
            "availableRoadLinks": []
          },
          {
            "time": 30,
            "availableRoadLinks": []
          },
          {
            "time": 30,
            "availableRoadLinks": []
          },
          {
            "time": 30,
            "availableRoadLinks": []
          },
          {
            "time": 30,
            "availableRoadLinks": []
          },
          {
            "time": 30,
            "availableRoadLinks": []
          }
        ]
      },
      "virtual": true
    },
    {
      "id": "intersection_8_1",
      "point": {
        "x": 2100,
        "y": 0
      },
      "width": 5,
      "roads": [
        "road_7_1_0",
        "road_8_0_1",
        "road_9_1_2",
        "road_8_2_3",
        "road_8_1_0",
        "road_8_1_1",
        "road_8_1_2",
        "road_8_1_3"
      ],
      "roadLinks": [
        {
          "type": "go_straight",
          "startRoad": "road_7_1_0",
          "endRoad": "road_8_1_0",
          "direction": 0,
          "laneLinks": [
            {
              "startLaneIndex": 0,
              "endLaneIndex": 0,
              "points": [
                {
                  "x": 2095.0,
                  "y": -2.0
                },
                {
                  "x": 2095.64,
                  "y": -2.0
                },
                {
                  "x": 2096.52,
                  "y": -2.0
                },
                {
                  "x": 2097.58,
                  "y": -2.0
                },
                {
                  "x": 2098.76,
                  "y": -2.0
                },
                {
                  "x": 2100.0,
                  "y": -2.0
                },
                {
                  "x": 2101.24,
                  "y": -2.0
                },
                {
                  "x": 2102.42,
                  "y": -2.0
                },
                {
                  "x": 2103.48,
                  "y": -2.0
                },
                {
                  "x": 2104.36,
                  "y": -2.0
                },
                {
                  "x": 2105.0,
                  "y": -2.0
                }
              ]
            }
          ]
        },
        {
          "type": "go_straight",
          "startRoad": "road_8_0_1",
          "endRoad": "road_8_1_1",
          "direction": 1,
          "laneLinks": [
            {
              "startLaneIndex": 0,
              "endLaneIndex": 0,
              "points": [
                {
                  "x": 2102.0,
                  "y": -5.0
                },
                {
                  "x": 2102.0,
                  "y": -4.36
                },
                {
                  "x": 2102.0,
                  "y": -3.48
                },
                {
                  "x": 2102.0,
                  "y": -2.42
                },
                {
                  "x": 2102.0,
                  "y": -1.24
                },
                {
                  "x": 2102.0,
                  "y": 0.0
                },
                {
                  "x": 2102.0,
                  "y": 1.24
                },
                {
                  "x": 2102.0,
                  "y": 2.42
                },
                {
                  "x": 2102.0,
                  "y": 3.48
                },
                {
                  "x": 2102.0,
                  "y": 4.36
                },
                {
                  "x": 2102.0,
                  "y": 5.0
                }
              ]
            }
          ]
        },
        {
          "type": "go_straight",
          "startRoad": "road_9_1_2",
          "endRoad": "road_8_1_2",
          "direction": 2,
          "laneLinks": [
            {
              "startLaneIndex": 0,
              "endLaneIndex": 0,
              "points": [
                {
                  "x": 2105.0,
                  "y": 2.0
                },
                {
                  "x": 2104.36,
                  "y": 2.0
                },
                {
                  "x": 2103.48,
                  "y": 2.0
                },
                {
                  "x": 2102.42,
                  "y": 2.0
                },
                {
                  "x": 2101.24,
                  "y": 2.0
                },
                {
                  "x": 2100.0,
                  "y": 2.0
                },
                {
                  "x": 2098.76,
                  "y": 2.0
                },
                {
                  "x": 2097.58,
                  "y": 2.0
                },
                {
                  "x": 2096.52,
                  "y": 2.0
                },
                {
                  "x": 2095.64,
                  "y": 2.0
                },
                {
                  "x": 2095.0,
                  "y": 2.0
                }
              ]
            }
          ]
        },
        {
          "type": "go_straight",
          "startRoad": "road_8_2_3",
          "endRoad": "road_8_1_3",
          "direction": 3,
          "laneLinks": [
            {
              "startLaneIndex": 0,
              "endLaneIndex": 0,
              "points": [
                {
                  "x": 2098.0,
                  "y": 5.0
                },
                {
                  "x": 2098.0,
                  "y": 4.36
                },
                {
                  "x": 2098.0,
                  "y": 3.48
                },
                {
                  "x": 2098.0,
                  "y": 2.42
                },
                {
                  "x": 2098.0,
                  "y": 1.24
                },
                {
                  "x": 2098.0,
                  "y": 0.0
                },
                {
                  "x": 2098.0,
                  "y": -1.24
                },
                {
                  "x": 2098.0,
                  "y": -2.42
                },
                {
                  "x": 2098.0,
                  "y": -3.48
                },
                {
                  "x": 2098.0,
                  "y": -4.36
                },
                {
                  "x": 2098.0,
                  "y": -5.0
                }
              ]
            }
          ]
        }
      ],
      "trafficLight": {
        "roadLinkIndices": [
          0,
          1,
          2,
          3
        ],
        "lightphases": [
          {
            "time": 5,
            "availableRoadLinks": []
          },
          {
            "time": 30,
            "availableRoadLinks": [
              0,
              2
            ]
          },
          {
            "time": 30,
            "availableRoadLinks": [
              1,
              3
            ]
          },
          {
            "time": 30,
            "availableRoadLinks": []
          },
          {
            "time": 30,
            "availableRoadLinks": []
          },
          {
            "time": 30,
            "availableRoadLinks": [
              0
            ]
          },
          {
            "time": 30,
            "availableRoadLinks": [
              2
            ]
          },
          {
            "time": 30,
            "availableRoadLinks": [
              1
            ]
          },
          {
            "time": 30,
            "availableRoadLinks": [
              3
            ]
          }
        ]
      },
      "virtual": false
    },
    {
      "id": "intersection_8_2",
      "point": {
        "x": 2100,
        "y": 300
      },
      "width": 0,
      "roads": [
        "road_8_1_1",
        "road_8_2_3"
      ],
      "roadLinks": [],
      "trafficLight": {
        "roadLinkIndices": [],
        "lightphases": [
          {
            "time": 5,
            "availableRoadLinks": []
          },
          {
            "time": 30,
            "availableRoadLinks": []
          },
          {
            "time": 30,
            "availableRoadLinks": []
          },
          {
            "time": 30,
            "availableRoadLinks": []
          },
          {
            "time": 30,
            "availableRoadLinks": []
          },
          {
            "time": 30,
            "availableRoadLinks": []
          },
          {
            "time": 30,
            "availableRoadLinks": []
          },
          {
            "time": 30,
            "availableRoadLinks": []
          },
          {
            "time": 30,
            "availableRoadLinks": []
          }
        ]
      },
      "virtual": true
    },
    {
      "id": "intersection_9_0",
      "point": {
        "x": 2400,
        "y": -300
      },
      "width": 0,
      "roads": [
        "road_9_1_3",
        "road_9_0_1"
      ],
      "roadLinks": [],
      "trafficLight": {
        "roadLinkIndices": [],
        "lightphases": [
          {
            "time": 5,
            "availableRoadLinks": []
          },
          {
            "time": 30,
            "availableRoadLinks": []
          },
          {
            "time": 30,
            "availableRoadLinks": []
          },
          {
            "time": 30,
            "availableRoadLinks": []
          },
          {
            "time": 30,
            "availableRoadLinks": []
          },
          {
            "time": 30,
            "availableRoadLinks": []
          },
          {
            "time": 30,
            "availableRoadLinks": []
          },
          {
            "time": 30,
            "availableRoadLinks": []
          },
          {
            "time": 30,
            "availableRoadLinks": []
          }
        ]
      },
      "virtual": true
    },
    {
      "id": "intersection_9_1",
      "point": {
        "x": 2400,
        "y": 0
      },
      "width": 5,
      "roads": [
        "road_8_1_0",
        "road_9_0_1",
        "road_10_1_2",
        "road_9_2_3",
        "road_9_1_0",
        "road_9_1_1",
        "road_9_1_2",
        "road_9_1_3"
      ],
      "roadLinks": [
        {
          "type": "go_straight",
          "startRoad": "road_8_1_0",
          "endRoad": "road_9_1_0",
          "direction": 0,
          "laneLinks": [
            {
              "startLaneIndex": 0,
              "endLaneIndex": 0,
              "points": [
                {
                  "x": 2395.0,
                  "y": -2.0
                },
                {
                  "x": 2395.64,
                  "y": -2.0
                },
                {
                  "x": 2396.52,
                  "y": -2.0
                },
                {
                  "x": 2397.58,
                  "y": -2.0
                },
                {
                  "x": 2398.76,
                  "y": -2.0
                },
                {
                  "x": 2400.0,
                  "y": -2.0
                },
                {
                  "x": 2401.24,
                  "y": -2.0
                },
                {
                  "x": 2402.42,
                  "y": -2.0
                },
                {
                  "x": 2403.48,
                  "y": -2.0
                },
                {
                  "x": 2404.36,
                  "y": -2.0
                },
                {
                  "x": 2405.0,
                  "y": -2.0
                }
              ]
            }
          ]
        },
        {
          "type": "go_straight",
          "startRoad": "road_9_0_1",
          "endRoad": "road_9_1_1",
          "direction": 1,
          "laneLinks": [
            {
              "startLaneIndex": 0,
              "endLaneIndex": 0,
              "points": [
                {
                  "x": 2402.0,
                  "y": -5.0
                },
                {
                  "x": 2402.0,
                  "y": -4.36
                },
                {
                  "x": 2402.0,
                  "y": -3.48
                },
                {
                  "x": 2402.0,
                  "y": -2.42
                },
                {
                  "x": 2402.0,
                  "y": -1.24
                },
                {
                  "x": 2402.0,
                  "y": 0.0
                },
                {
                  "x": 2402.0,
                  "y": 1.24
                },
                {
                  "x": 2402.0,
                  "y": 2.42
                },
                {
                  "x": 2402.0,
                  "y": 3.48
                },
                {
                  "x": 2402.0,
                  "y": 4.36
                },
                {
                  "x": 2402.0,
                  "y": 5.0
                }
              ]
            }
          ]
        },
        {
          "type": "go_straight",
          "startRoad": "road_10_1_2",
          "endRoad": "road_9_1_2",
          "direction": 2,
          "laneLinks": [
            {
              "startLaneIndex": 0,
              "endLaneIndex": 0,
              "points": [
                {
                  "x": 2405.0,
                  "y": 2.0
                },
                {
                  "x": 2404.36,
                  "y": 2.0
                },
                {
                  "x": 2403.48,
                  "y": 2.0
                },
                {
                  "x": 2402.42,
                  "y": 2.0
                },
                {
                  "x": 2401.24,
                  "y": 2.0
                },
                {
                  "x": 2400.0,
                  "y": 2.0
                },
                {
                  "x": 2398.76,
                  "y": 2.0
                },
                {
                  "x": 2397.58,
                  "y": 2.0
                },
                {
                  "x": 2396.52,
                  "y": 2.0
                },
                {
                  "x": 2395.64,
                  "y": 2.0
                },
                {
                  "x": 2395.0,
                  "y": 2.0
                }
              ]
            }
          ]
        },
        {
          "type": "go_straight",
          "startRoad": "road_9_2_3",
          "endRoad": "road_9_1_3",
          "direction": 3,
          "laneLinks": [
            {
              "startLaneIndex": 0,
              "endLaneIndex": 0,
              "points": [
                {
                  "x": 2398.0,
                  "y": 5.0
                },
                {
                  "x": 2398.0,
                  "y": 4.36
                },
                {
                  "x": 2398.0,
                  "y": 3.48
                },
                {
                  "x": 2398.0,
                  "y": 2.42
                },
                {
                  "x": 2398.0,
                  "y": 1.24
                },
                {
                  "x": 2398.0,
                  "y": 0.0
                },
                {
                  "x": 2398.0,
                  "y": -1.24
                },
                {
                  "x": 2398.0,
                  "y": -2.42
                },
                {
                  "x": 2398.0,
                  "y": -3.48
                },
                {
                  "x": 2398.0,
                  "y": -4.36
                },
                {
                  "x": 2398.0,
                  "y": -5.0
                }
              ]
            }
          ]
        }
      ],
      "trafficLight": {
        "roadLinkIndices": [
          0,
          1,
          2,
          3
        ],
        "lightphases": [
          {
            "time": 5,
            "availableRoadLinks": []
          },
          {
            "time": 30,
            "availableRoadLinks": [
              0,
              2
            ]
          },
          {
            "time": 30,
            "availableRoadLinks": [
              1,
              3
            ]
          },
          {
            "time": 30,
            "availableRoadLinks": []
          },
          {
            "time": 30,
            "availableRoadLinks": []
          },
          {
            "time": 30,
            "availableRoadLinks": [
              0
            ]
          },
          {
            "time": 30,
            "availableRoadLinks": [
              2
            ]
          },
          {
            "time": 30,
            "availableRoadLinks": [
              1
            ]
          },
          {
            "time": 30,
            "availableRoadLinks": [
              3
            ]
          }
        ]
      },
      "virtual": false
    },
    {
      "id": "intersection_9_2",
      "point": {
        "x": 2400,
        "y": 300
      },
      "width": 0,
      "roads": [
        "road_9_1_1",
        "road_9_2_3"
      ],
      "roadLinks": [],
      "trafficLight": {
        "roadLinkIndices": [],
        "lightphases": [
          {
            "time": 5,
            "availableRoadLinks": []
          },
          {
            "time": 30,
            "availableRoadLinks": []
          },
          {
            "time": 30,
            "availableRoadLinks": []
          },
          {
            "time": 30,
            "availableRoadLinks": []
          },
          {
            "time": 30,
            "availableRoadLinks": []
          },
          {
            "time": 30,
            "availableRoadLinks": []
          },
          {
            "time": 30,
            "availableRoadLinks": []
          },
          {
            "time": 30,
            "availableRoadLinks": []
          },
          {
            "time": 30,
            "availableRoadLinks": []
          }
        ]
      },
      "virtual": true
    },
    {
      "id": "intersection_10_0",
      "point": {
        "x": 2700,
        "y": -300
      },
      "width": 0,
      "roads": [
        "road_10_1_3",
        "road_10_0_1"
      ],
      "roadLinks": [],
      "trafficLight": {
        "roadLinkIndices": [],
        "lightphases": [
          {
            "time": 5,
            "availableRoadLinks": []
          },
          {
            "time": 30,
            "availableRoadLinks": []
          },
          {
            "time": 30,
            "availableRoadLinks": []
          },
          {
            "time": 30,
            "availableRoadLinks": []
          },
          {
            "time": 30,
            "availableRoadLinks": []
          },
          {
            "time": 30,
            "availableRoadLinks": []
          },
          {
            "time": 30,
            "availableRoadLinks": []
          },
          {
            "time": 30,
            "availableRoadLinks": []
          },
          {
            "time": 30,
            "availableRoadLinks": []
          }
        ]
      },
      "virtual": true
    },
    {
      "id": "intersection_10_1",
      "point": {
        "x": 2700,
        "y": 0
      },
      "width": 5,
      "roads": [
        "road_9_1_0",
        "road_10_0_1",
        "road_11_1_2",
        "road_10_2_3",
        "road_10_1_0",
        "road_10_1_1",
        "road_10_1_2",
        "road_10_1_3"
      ],
      "roadLinks": [
        {
          "type": "go_straight",
          "startRoad": "road_9_1_0",
          "endRoad": "road_10_1_0",
          "direction": 0,
          "laneLinks": [
            {
              "startLaneIndex": 0,
              "endLaneIndex": 0,
              "points": [
                {
                  "x": 2695.0,
                  "y": -2.0
                },
                {
                  "x": 2695.64,
                  "y": -2.0
                },
                {
                  "x": 2696.52,
                  "y": -2.0
                },
                {
                  "x": 2697.58,
                  "y": -2.0
                },
                {
                  "x": 2698.76,
                  "y": -2.0
                },
                {
                  "x": 2700.0,
                  "y": -2.0
                },
                {
                  "x": 2701.24,
                  "y": -2.0
                },
                {
                  "x": 2702.42,
                  "y": -2.0
                },
                {
                  "x": 2703.48,
                  "y": -2.0
                },
                {
                  "x": 2704.36,
                  "y": -2.0
                },
                {
                  "x": 2705.0,
                  "y": -2.0
                }
              ]
            }
          ]
        },
        {
          "type": "go_straight",
          "startRoad": "road_10_0_1",
          "endRoad": "road_10_1_1",
          "direction": 1,
          "laneLinks": [
            {
              "startLaneIndex": 0,
              "endLaneIndex": 0,
              "points": [
                {
                  "x": 2702.0,
                  "y": -5.0
                },
                {
                  "x": 2702.0,
                  "y": -4.36
                },
                {
                  "x": 2702.0,
                  "y": -3.48
                },
                {
                  "x": 2702.0,
                  "y": -2.42
                },
                {
                  "x": 2702.0,
                  "y": -1.24
                },
                {
                  "x": 2702.0,
                  "y": 0.0
                },
                {
                  "x": 2702.0,
                  "y": 1.24
                },
                {
                  "x": 2702.0,
                  "y": 2.42
                },
                {
                  "x": 2702.0,
                  "y": 3.48
                },
                {
                  "x": 2702.0,
                  "y": 4.36
                },
                {
                  "x": 2702.0,
                  "y": 5.0
                }
              ]
            }
          ]
        },
        {
          "type": "go_straight",
          "startRoad": "road_11_1_2",
          "endRoad": "road_10_1_2",
          "direction": 2,
          "laneLinks": [
            {
              "startLaneIndex": 0,
              "endLaneIndex": 0,
              "points": [
                {
                  "x": 2705.0,
                  "y": 2.0
                },
                {
                  "x": 2704.36,
                  "y": 2.0
                },
                {
                  "x": 2703.48,
                  "y": 2.0
                },
                {
                  "x": 2702.42,
                  "y": 2.0
                },
                {
                  "x": 2701.24,
                  "y": 2.0
                },
                {
                  "x": 2700.0,
                  "y": 2.0
                },
                {
                  "x": 2698.76,
                  "y": 2.0
                },
                {
                  "x": 2697.58,
                  "y": 2.0
                },
                {
                  "x": 2696.52,
                  "y": 2.0
                },
                {
                  "x": 2695.64,
                  "y": 2.0
                },
                {
                  "x": 2695.0,
                  "y": 2.0
                }
              ]
            }
          ]
        },
        {
          "type": "go_straight",
          "startRoad": "road_10_2_3",
          "endRoad": "road_10_1_3",
          "direction": 3,
          "laneLinks": [
            {
              "startLaneIndex": 0,
              "endLaneIndex": 0,
              "points": [
                {
                  "x": 2698.0,
                  "y": 5.0
                },
                {
                  "x": 2698.0,
                  "y": 4.36
                },
                {
                  "x": 2698.0,
                  "y": 3.48
                },
                {
                  "x": 2698.0,
                  "y": 2.42
                },
                {
                  "x": 2698.0,
                  "y": 1.24
                },
                {
                  "x": 2698.0,
                  "y": 0.0
                },
                {
                  "x": 2698.0,
                  "y": -1.24
                },
                {
                  "x": 2698.0,
                  "y": -2.42
                },
                {
                  "x": 2698.0,
                  "y": -3.48
                },
                {
                  "x": 2698.0,
                  "y": -4.36
                },
                {
                  "x": 2698.0,
                  "y": -5.0
                }
              ]
            }
          ]
        }
      ],
      "trafficLight": {
        "roadLinkIndices": [
          0,
          1,
          2,
          3
        ],
        "lightphases": [
          {
            "time": 5,
            "availableRoadLinks": []
          },
          {
            "time": 30,
            "availableRoadLinks": [
              0,
              2
            ]
          },
          {
            "time": 30,
            "availableRoadLinks": [
              1,
              3
            ]
          },
          {
            "time": 30,
            "availableRoadLinks": []
          },
          {
            "time": 30,
            "availableRoadLinks": []
          },
          {
            "time": 30,
            "availableRoadLinks": [
              0
            ]
          },
          {
            "time": 30,
            "availableRoadLinks": [
              2
            ]
          },
          {
            "time": 30,
            "availableRoadLinks": [
              1
            ]
          },
          {
            "time": 30,
            "availableRoadLinks": [
              3
            ]
          }
        ]
      },
      "virtual": false
    },
    {
      "id": "intersection_10_2",
      "point": {
        "x": 2700,
        "y": 300
      },
      "width": 0,
      "roads": [
        "road_10_1_1",
        "road_10_2_3"
      ],
      "roadLinks": [],
      "trafficLight": {
        "roadLinkIndices": [],
        "lightphases": [
          {
            "time": 5,
            "availableRoadLinks": []
          },
          {
            "time": 30,
            "availableRoadLinks": []
          },
          {
            "time": 30,
            "availableRoadLinks": []
          },
          {
            "time": 30,
            "availableRoadLinks": []
          },
          {
            "time": 30,
            "availableRoadLinks": []
          },
          {
            "time": 30,
            "availableRoadLinks": []
          },
          {
            "time": 30,
            "availableRoadLinks": []
          },
          {
            "time": 30,
            "availableRoadLinks": []
          },
          {
            "time": 30,
            "availableRoadLinks": []
          }
        ]
      },
      "virtual": true
    },
    {
      "id": "intersection_11_1",
      "point": {
        "x": 3000,
        "y": 0
      },
      "width": 0,
      "roads": [
        "road_10_1_0",
        "road_11_1_2"
      ],
      "roadLinks": [],
      "trafficLight": {
        "roadLinkIndices": [],
        "lightphases": [
          {
            "time": 5,
            "availableRoadLinks": []
          },
          {
            "time": 30,
            "availableRoadLinks": []
          },
          {
            "time": 30,
            "availableRoadLinks": []
          },
          {
            "time": 30,
            "availableRoadLinks": []
          },
          {
            "time": 30,
            "availableRoadLinks": []
          },
          {
            "time": 30,
            "availableRoadLinks": []
          },
          {
            "time": 30,
            "availableRoadLinks": []
          },
          {
            "time": 30,
            "availableRoadLinks": []
          },
          {
            "time": 30,
            "availableRoadLinks": []
          }
        ]
      },
      "virtual": true
    }
  ],
  "roads": [
    {
      "id": "road_0_1_0",
      "points": [
        {
          "x": -300,
          "y": 0
        },
        {
          "x": 0,
          "y": 0
        }
      ],
      "lanes": [
        {
          "width": 4,
          "maxSpeed": 11.111
        }
      ],
      "startIntersection": "intersection_0_1",
      "endIntersection": "intersection_1_1"
    },
    {
      "id": "road_1_0_1",
      "points": [
        {
          "x": 0,
          "y": -300
        },
        {
          "x": 0,
          "y": 0
        }
      ],
      "lanes": [
        {
          "width": 4,
          "maxSpeed": 11.111
        }
      ],
      "startIntersection": "intersection_1_0",
      "endIntersection": "intersection_1_1"
    },
    {
      "id": "road_1_1_0",
      "points": [
        {
          "x": 0,
          "y": 0
        },
        {
          "x": 300,
          "y": 0
        }
      ],
      "lanes": [
        {
          "width": 4,
          "maxSpeed": 11.111
        }
      ],
      "startIntersection": "intersection_1_1",
      "endIntersection": "intersection_2_1"
    },
    {
      "id": "road_1_1_1",
      "points": [
        {
          "x": 0,
          "y": 0
        },
        {
          "x": 0,
          "y": 300
        }
      ],
      "lanes": [
        {
          "width": 4,
          "maxSpeed": 11.111
        }
      ],
      "startIntersection": "intersection_1_1",
      "endIntersection": "intersection_1_2"
    },
    {
      "id": "road_1_1_2",
      "points": [
        {
          "x": 0,
          "y": 0
        },
        {
          "x": -300,
          "y": 0
        }
      ],
      "lanes": [
        {
          "width": 4,
          "maxSpeed": 11.111
        }
      ],
      "startIntersection": "intersection_1_1",
      "endIntersection": "intersection_0_1"
    },
    {
      "id": "road_1_1_3",
      "points": [
        {
          "x": 0,
          "y": 0
        },
        {
          "x": 0,
          "y": -300
        }
      ],
      "lanes": [
        {
          "width": 4,
          "maxSpeed": 11.111
        }
      ],
      "startIntersection": "intersection_1_1",
      "endIntersection": "intersection_1_0"
    },
    {
      "id": "road_1_2_3",
      "points": [
        {
          "x": 0,
          "y": 300
        },
        {
          "x": 0,
          "y": 0
        }
      ],
      "lanes": [
        {
          "width": 4,
          "maxSpeed": 11.111
        }
      ],
      "startIntersection": "intersection_1_2",
      "endIntersection": "intersection_1_1"
    },
    {
      "id": "road_2_0_1",
      "points": [
        {
          "x": 300,
          "y": -300
        },
        {
          "x": 300,
          "y": 0
        }
      ],
      "lanes": [
        {
          "width": 4,
          "maxSpeed": 11.111
        }
      ],
      "startIntersection": "intersection_2_0",
      "endIntersection": "intersection_2_1"
    },
    {
      "id": "road_2_1_0",
      "points": [
        {
          "x": 300,
          "y": 0
        },
        {
          "x": 600,
          "y": 0
        }
      ],
      "lanes": [
        {
          "width": 4,
          "maxSpeed": 11.111
        }
      ],
      "startIntersection": "intersection_2_1",
      "endIntersection": "intersection_3_1"
    },
    {
      "id": "road_2_1_1",
      "points": [
        {
          "x": 300,
          "y": 0
        },
        {
          "x": 300,
          "y": 300
        }
      ],
      "lanes": [
        {
          "width": 4,
          "maxSpeed": 11.111
        }
      ],
      "startIntersection": "intersection_2_1",
      "endIntersection": "intersection_2_2"
    },
    {
      "id": "road_2_1_2",
      "points": [
        {
          "x": 300,
          "y": 0
        },
        {
          "x": 0,
          "y": 0
        }
      ],
      "lanes": [
        {
          "width": 4,
          "maxSpeed": 11.111
        }
      ],
      "startIntersection": "intersection_2_1",
      "endIntersection": "intersection_1_1"
    },
    {
      "id": "road_2_1_3",
      "points": [
        {
          "x": 300,
          "y": 0
        },
        {
          "x": 300,
          "y": -300
        }
      ],
      "lanes": [
        {
          "width": 4,
          "maxSpeed": 11.111
        }
      ],
      "startIntersection": "intersection_2_1",
      "endIntersection": "intersection_2_0"
    },
    {
      "id": "road_2_2_3",
      "points": [
        {
          "x": 300,
          "y": 300
        },
        {
          "x": 300,
          "y": 0
        }
      ],
      "lanes": [
        {
          "width": 4,
          "maxSpeed": 11.111
        }
      ],
      "startIntersection": "intersection_2_2",
      "endIntersection": "intersection_2_1"
    },
    {
      "id": "road_3_0_1",
      "points": [
        {
          "x": 600,
          "y": -300
        },
        {
          "x": 600,
          "y": 0
        }
      ],
      "lanes": [
        {
          "width": 4,
          "maxSpeed": 11.111
        }
      ],
      "startIntersection": "intersection_3_0",
      "endIntersection": "intersection_3_1"
    },
    {
      "id": "road_3_1_0",
      "points": [
        {
          "x": 600,
          "y": 0
        },
        {
          "x": 900,
          "y": 0
        }
      ],
      "lanes": [
        {
          "width": 4,
          "maxSpeed": 11.111
        }
      ],
      "startIntersection": "intersection_3_1",
      "endIntersection": "intersection_4_1"
    },
    {
      "id": "road_3_1_1",
      "points": [
        {
          "x": 600,
          "y": 0
        },
        {
          "x": 600,
          "y": 300
        }
      ],
      "lanes": [
        {
          "width": 4,
          "maxSpeed": 11.111
        }
      ],
      "startIntersection": "intersection_3_1",
      "endIntersection": "intersection_3_2"
    },
    {
      "id": "road_3_1_2",
      "points": [
        {
          "x": 600,
          "y": 0
        },
        {
          "x": 300,
          "y": 0
        }
      ],
      "lanes": [
        {
          "width": 4,
          "maxSpeed": 11.111
        }
      ],
      "startIntersection": "intersection_3_1",
      "endIntersection": "intersection_2_1"
    },
    {
      "id": "road_3_1_3",
      "points": [
        {
          "x": 600,
          "y": 0
        },
        {
          "x": 600,
          "y": -300
        }
      ],
      "lanes": [
        {
          "width": 4,
          "maxSpeed": 11.111
        }
      ],
      "startIntersection": "intersection_3_1",
      "endIntersection": "intersection_3_0"
    },
    {
      "id": "road_3_2_3",
      "points": [
        {
          "x": 600,
          "y": 300
        },
        {
          "x": 600,
          "y": 0
        }
      ],
      "lanes": [
        {
          "width": 4,
          "maxSpeed": 11.111
        }
      ],
      "startIntersection": "intersection_3_2",
      "endIntersection": "intersection_3_1"
    },
    {
      "id": "road_4_0_1",
      "points": [
        {
          "x": 900,
          "y": -300
        },
        {
          "x": 900,
          "y": 0
        }
      ],
      "lanes": [
        {
          "width": 4,
          "maxSpeed": 11.111
        }
      ],
      "startIntersection": "intersection_4_0",
      "endIntersection": "intersection_4_1"
    },
    {
      "id": "road_4_1_0",
      "points": [
        {
          "x": 900,
          "y": 0
        },
        {
          "x": 1200,
          "y": 0
        }
      ],
      "lanes": [
        {
          "width": 4,
          "maxSpeed": 11.111
        }
      ],
      "startIntersection": "intersection_4_1",
      "endIntersection": "intersection_5_1"
    },
    {
      "id": "road_4_1_1",
      "points": [
        {
          "x": 900,
          "y": 0
        },
        {
          "x": 900,
          "y": 300
        }
      ],
      "lanes": [
        {
          "width": 4,
          "maxSpeed": 11.111
        }
      ],
      "startIntersection": "intersection_4_1",
      "endIntersection": "intersection_4_2"
    },
    {
      "id": "road_4_1_2",
      "points": [
        {
          "x": 900,
          "y": 0
        },
        {
          "x": 600,
          "y": 0
        }
      ],
      "lanes": [
        {
          "width": 4,
          "maxSpeed": 11.111
        }
      ],
      "startIntersection": "intersection_4_1",
      "endIntersection": "intersection_3_1"
    },
    {
      "id": "road_4_1_3",
      "points": [
        {
          "x": 900,
          "y": 0
        },
        {
          "x": 900,
          "y": -300
        }
      ],
      "lanes": [
        {
          "width": 4,
          "maxSpeed": 11.111
        }
      ],
      "startIntersection": "intersection_4_1",
      "endIntersection": "intersection_4_0"
    },
    {
      "id": "road_4_2_3",
      "points": [
        {
          "x": 900,
          "y": 300
        },
        {
          "x": 900,
          "y": 0
        }
      ],
      "lanes": [
        {
          "width": 4,
          "maxSpeed": 11.111
        }
      ],
      "startIntersection": "intersection_4_2",
      "endIntersection": "intersection_4_1"
    },
    {
      "id": "road_5_0_1",
      "points": [
        {
          "x": 1200,
          "y": -300
        },
        {
          "x": 1200,
          "y": 0
        }
      ],
      "lanes": [
        {
          "width": 4,
          "maxSpeed": 11.111
        }
      ],
      "startIntersection": "intersection_5_0",
      "endIntersection": "intersection_5_1"
    },
    {
      "id": "road_5_1_0",
      "points": [
        {
          "x": 1200,
          "y": 0
        },
        {
          "x": 1500,
          "y": 0
        }
      ],
      "lanes": [
        {
          "width": 4,
          "maxSpeed": 11.111
        }
      ],
      "startIntersection": "intersection_5_1",
      "endIntersection": "intersection_6_1"
    },
    {
      "id": "road_5_1_1",
      "points": [
        {
          "x": 1200,
          "y": 0
        },
        {
          "x": 1200,
          "y": 300
        }
      ],
      "lanes": [
        {
          "width": 4,
          "maxSpeed": 11.111
        }
      ],
      "startIntersection": "intersection_5_1",
      "endIntersection": "intersection_5_2"
    },
    {
      "id": "road_5_1_2",
      "points": [
        {
          "x": 1200,
          "y": 0
        },
        {
          "x": 900,
          "y": 0
        }
      ],
      "lanes": [
        {
          "width": 4,
          "maxSpeed": 11.111
        }
      ],
      "startIntersection": "intersection_5_1",
      "endIntersection": "intersection_4_1"
    },
    {
      "id": "road_5_1_3",
      "points": [
        {
          "x": 1200,
          "y": 0
        },
        {
          "x": 1200,
          "y": -300
        }
      ],
      "lanes": [
        {
          "width": 4,
          "maxSpeed": 11.111
        }
      ],
      "startIntersection": "intersection_5_1",
      "endIntersection": "intersection_5_0"
    },
    {
      "id": "road_5_2_3",
      "points": [
        {
          "x": 1200,
          "y": 300
        },
        {
          "x": 1200,
          "y": 0
        }
      ],
      "lanes": [
        {
          "width": 4,
          "maxSpeed": 11.111
        }
      ],
      "startIntersection": "intersection_5_2",
      "endIntersection": "intersection_5_1"
    },
    {
      "id": "road_6_0_1",
      "points": [
        {
          "x": 1500,
          "y": -300
        },
        {
          "x": 1500,
          "y": 0
        }
      ],
      "lanes": [
        {
          "width": 4,
          "maxSpeed": 11.111
        }
      ],
      "startIntersection": "intersection_6_0",
      "endIntersection": "intersection_6_1"
    },
    {
      "id": "road_6_1_0",
      "points": [
        {
          "x": 1500,
          "y": 0
        },
        {
          "x": 1800,
          "y": 0
        }
      ],
      "lanes": [
        {
          "width": 4,
          "maxSpeed": 11.111
        }
      ],
      "startIntersection": "intersection_6_1",
      "endIntersection": "intersection_7_1"
    },
    {
      "id": "road_6_1_1",
      "points": [
        {
          "x": 1500,
          "y": 0
        },
        {
          "x": 1500,
          "y": 300
        }
      ],
      "lanes": [
        {
          "width": 4,
          "maxSpeed": 11.111
        }
      ],
      "startIntersection": "intersection_6_1",
      "endIntersection": "intersection_6_2"
    },
    {
      "id": "road_6_1_2",
      "points": [
        {
          "x": 1500,
          "y": 0
        },
        {
          "x": 1200,
          "y": 0
        }
      ],
      "lanes": [
        {
          "width": 4,
          "maxSpeed": 11.111
        }
      ],
      "startIntersection": "intersection_6_1",
      "endIntersection": "intersection_5_1"
    },
    {
      "id": "road_6_1_3",
      "points": [
        {
          "x": 1500,
          "y": 0
        },
        {
          "x": 1500,
          "y": -300
        }
      ],
      "lanes": [
        {
          "width": 4,
          "maxSpeed": 11.111
        }
      ],
      "startIntersection": "intersection_6_1",
      "endIntersection": "intersection_6_0"
    },
    {
      "id": "road_6_2_3",
      "points": [
        {
          "x": 1500,
          "y": 300
        },
        {
          "x": 1500,
          "y": 0
        }
      ],
      "lanes": [
        {
          "width": 4,
          "maxSpeed": 11.111
        }
      ],
      "startIntersection": "intersection_6_2",
      "endIntersection": "intersection_6_1"
    },
    {
      "id": "road_7_0_1",
      "points": [
        {
          "x": 1800,
          "y": -300
        },
        {
          "x": 1800,
          "y": 0
        }
      ],
      "lanes": [
        {
          "width": 4,
          "maxSpeed": 11.111
        }
      ],
      "startIntersection": "intersection_7_0",
      "endIntersection": "intersection_7_1"
    },
    {
      "id": "road_7_1_0",
      "points": [
        {
          "x": 1800,
          "y": 0
        },
        {
          "x": 2100,
          "y": 0
        }
      ],
      "lanes": [
        {
          "width": 4,
          "maxSpeed": 11.111
        }
      ],
      "startIntersection": "intersection_7_1",
      "endIntersection": "intersection_8_1"
    },
    {
      "id": "road_7_1_1",
      "points": [
        {
          "x": 1800,
          "y": 0
        },
        {
          "x": 1800,
          "y": 300
        }
      ],
      "lanes": [
        {
          "width": 4,
          "maxSpeed": 11.111
        }
      ],
      "startIntersection": "intersection_7_1",
      "endIntersection": "intersection_7_2"
    },
    {
      "id": "road_7_1_2",
      "points": [
        {
          "x": 1800,
          "y": 0
        },
        {
          "x": 1500,
          "y": 0
        }
      ],
      "lanes": [
        {
          "width": 4,
          "maxSpeed": 11.111
        }
      ],
      "startIntersection": "intersection_7_1",
      "endIntersection": "intersection_6_1"
    },
    {
      "id": "road_7_1_3",
      "points": [
        {
          "x": 1800,
          "y": 0
        },
        {
          "x": 1800,
          "y": -300
        }
      ],
      "lanes": [
        {
          "width": 4,
          "maxSpeed": 11.111
        }
      ],
      "startIntersection": "intersection_7_1",
      "endIntersection": "intersection_7_0"
    },
    {
      "id": "road_7_2_3",
      "points": [
        {
          "x": 1800,
          "y": 300
        },
        {
          "x": 1800,
          "y": 0
        }
      ],
      "lanes": [
        {
          "width": 4,
          "maxSpeed": 11.111
        }
      ],
      "startIntersection": "intersection_7_2",
      "endIntersection": "intersection_7_1"
    },
    {
      "id": "road_8_0_1",
      "points": [
        {
          "x": 2100,
          "y": -300
        },
        {
          "x": 2100,
          "y": 0
        }
      ],
      "lanes": [
        {
          "width": 4,
          "maxSpeed": 11.111
        }
      ],
      "startIntersection": "intersection_8_0",
      "endIntersection": "intersection_8_1"
    },
    {
      "id": "road_8_1_0",
      "points": [
        {
          "x": 2100,
          "y": 0
        },
        {
          "x": 2400,
          "y": 0
        }
      ],
      "lanes": [
        {
          "width": 4,
          "maxSpeed": 11.111
        }
      ],
      "startIntersection": "intersection_8_1",
      "endIntersection": "intersection_9_1"
    },
    {
      "id": "road_8_1_1",
      "points": [
        {
          "x": 2100,
          "y": 0
        },
        {
          "x": 2100,
          "y": 300
        }
      ],
      "lanes": [
        {
          "width": 4,
          "maxSpeed": 11.111
        }
      ],
      "startIntersection": "intersection_8_1",
      "endIntersection": "intersection_8_2"
    },
    {
      "id": "road_8_1_2",
      "points": [
        {
          "x": 2100,
          "y": 0
        },
        {
          "x": 1800,
          "y": 0
        }
      ],
      "lanes": [
        {
          "width": 4,
          "maxSpeed": 11.111
        }
      ],
      "startIntersection": "intersection_8_1",
      "endIntersection": "intersection_7_1"
    },
    {
      "id": "road_8_1_3",
      "points": [
        {
          "x": 2100,
          "y": 0
        },
        {
          "x": 2100,
          "y": -300
        }
      ],
      "lanes": [
        {
          "width": 4,
          "maxSpeed": 11.111
        }
      ],
      "startIntersection": "intersection_8_1",
      "endIntersection": "intersection_8_0"
    },
    {
      "id": "road_8_2_3",
      "points": [
        {
          "x": 2100,
          "y": 300
        },
        {
          "x": 2100,
          "y": 0
        }
      ],
      "lanes": [
        {
          "width": 4,
          "maxSpeed": 11.111
        }
      ],
      "startIntersection": "intersection_8_2",
      "endIntersection": "intersection_8_1"
    },
    {
      "id": "road_9_0_1",
      "points": [
        {
          "x": 2400,
          "y": -300
        },
        {
          "x": 2400,
          "y": 0
        }
      ],
      "lanes": [
        {
          "width": 4,
          "maxSpeed": 11.111
        }
      ],
      "startIntersection": "intersection_9_0",
      "endIntersection": "intersection_9_1"
    },
    {
      "id": "road_9_1_0",
      "points": [
        {
          "x": 2400,
          "y": 0
        },
        {
          "x": 2700,
          "y": 0
        }
      ],
      "lanes": [
        {
          "width": 4,
          "maxSpeed": 11.111
        }
      ],
      "startIntersection": "intersection_9_1",
      "endIntersection": "intersection_10_1"
    },
    {
      "id": "road_9_1_1",
      "points": [
        {
          "x": 2400,
          "y": 0
        },
        {
          "x": 2400,
          "y": 300
        }
      ],
      "lanes": [
        {
          "width": 4,
          "maxSpeed": 11.111
        }
      ],
      "startIntersection": "intersection_9_1",
      "endIntersection": "intersection_9_2"
    },
    {
      "id": "road_9_1_2",
      "points": [
        {
          "x": 2400,
          "y": 0
        },
        {
          "x": 2100,
          "y": 0
        }
      ],
      "lanes": [
        {
          "width": 4,
          "maxSpeed": 11.111
        }
      ],
      "startIntersection": "intersection_9_1",
      "endIntersection": "intersection_8_1"
    },
    {
      "id": "road_9_1_3",
      "points": [
        {
          "x": 2400,
          "y": 0
        },
        {
          "x": 2400,
          "y": -300
        }
      ],
      "lanes": [
        {
          "width": 4,
          "maxSpeed": 11.111
        }
      ],
      "startIntersection": "intersection_9_1",
      "endIntersection": "intersection_9_0"
    },
    {
      "id": "road_9_2_3",
      "points": [
        {
          "x": 2400,
          "y": 300
        },
        {
          "x": 2400,
          "y": 0
        }
      ],
      "lanes": [
        {
          "width": 4,
          "maxSpeed": 11.111
        }
      ],
      "startIntersection": "intersection_9_2",
      "endIntersection": "intersection_9_1"
    },
    {
      "id": "road_10_0_1",
      "points": [
        {
          "x": 2700,
          "y": -300
        },
        {
          "x": 2700,
          "y": 0
        }
      ],
      "lanes": [
        {
          "width": 4,
          "maxSpeed": 11.111
        }
      ],
      "startIntersection": "intersection_10_0",
      "endIntersection": "intersection_10_1"
    },
    {
      "id": "road_10_1_0",
      "points": [
        {
          "x": 2700,
          "y": 0
        },
        {
          "x": 3000,
          "y": 0
        }
      ],
      "lanes": [
        {
          "width": 4,
          "maxSpeed": 11.111
        }
      ],
      "startIntersection": "intersection_10_1",
      "endIntersection": "intersection_11_1"
    },
    {
      "id": "road_10_1_1",
      "points": [
        {
          "x": 2700,
          "y": 0
        },
        {
          "x": 2700,
          "y": 300
        }
      ],
      "lanes": [
        {
          "width": 4,
          "maxSpeed": 11.111
        }
      ],
      "startIntersection": "intersection_10_1",
      "endIntersection": "intersection_10_2"
    },
    {
      "id": "road_10_1_2",
      "points": [
        {
          "x": 2700,
          "y": 0
        },
        {
          "x": 2400,
          "y": 0
        }
      ],
      "lanes": [
        {
          "width": 4,
          "maxSpeed": 11.111
        }
      ],
      "startIntersection": "intersection_10_1",
      "endIntersection": "intersection_9_1"
    },
    {
      "id": "road_10_1_3",
      "points": [
        {
          "x": 2700,
          "y": 0
        },
        {
          "x": 2700,
          "y": -300
        }
      ],
      "lanes": [
        {
          "width": 4,
          "maxSpeed": 11.111
        }
      ],
      "startIntersection": "intersection_10_1",
      "endIntersection": "intersection_10_0"
    },
    {
      "id": "road_10_2_3",
      "points": [
        {
          "x": 2700,
          "y": 300
        },
        {
          "x": 2700,
          "y": 0
        }
      ],
      "lanes": [
        {
          "width": 4,
          "maxSpeed": 11.111
        }
      ],
      "startIntersection": "intersection_10_2",
      "endIntersection": "intersection_10_1"
    },
    {
      "id": "road_11_1_2",
      "points": [
        {
          "x": 3000,
          "y": 0
        },
        {
          "x": 2700,
          "y": 0
        }
      ],
      "lanes": [
        {
          "width": 4,
          "maxSpeed": 11.111
        }
      ],
      "startIntersection": "intersection_11_1",
      "endIntersection": "intersection_10_1"
    }
  ]
}
