# Supplementary material
Source: ML conference proceedings conference paper supplement (https://proceedings.neurips.cc/paper_files/paper/2021/hash/654516d1b4df6917094de807156adc14-Abstract.html)
Supplement: Supplementary file 1 [file 654516d1b4df6917094de807156adc14-Supplemental.zip › neurips-supplementary/codes/frontend/pixi/templates/index.html]

Hello World


## Status Panel

|  |  |
| --- | --- |
| 当前车辆数 | 0 |
| 模拟总步数 | 0 |
| 当前模拟步数 | 0 |
| 当前进度 | 0 |

##### Navigation Keys

`left`
`right`
`up`
`down`
`-`
`=`
`p(pause)`
`1(slowdown)`
`2(speedup)`

##### Info Box

## City Simulator
