# Supplementary material
Source: ML conference proceedings conference paper supplement (https://proceedings.neurips.cc/paper_files/paper/2021/hash/654516d1b4df6917094de807156adc14-Abstract.html)
Supplement: Supplementary file 1 [file 654516d1b4df6917094de807156adc14-Supplemental.zip › neurips-supplementary/codes/generator.py]

import os
import copy
# from config import DIC_AGENTS, DIC_ENVS
from config import DIC_AGENTS
import time
import sys

from anon_env import AnonEnv

# from multiprocessing import Process, Pool
from config import Process, Pool


def null(*a): pass
myprint=print; print=null


class Generator:
    def __init__(self, cnt_round, cnt_gen, dic_path, dic_exp_conf, dic_agent_conf, dic_traffic_env_conf, best_round=None):

        self.cnt_round = cnt_round
        self.cnt_gen = cnt_gen
        self.dic_exp_conf = dic_exp_conf
        self.dic_path = dic_path
        self.dic_agent_conf = copy.deepcopy(dic_agent_conf)
        self.dic_traffic_env_conf = dic_traffic_env_conf
        self.agents = [None]*dic_traffic_env_conf['NUM_AGENTS']

        if self.dic_exp_conf["PRETRAIN"]:
            self.path_to_log = os.path.join(self.dic_path["PATH_TO_PRETRAIN_WORK_DIRECTORY"], "train_round",
                                            "round_" + str(self.cnt_round), "generator_" + str(self.cnt_gen))
        else:
            self.path_to_log = os.path.join(self.dic_path["PATH_TO_WORK_DIRECTORY"], "train_round", "round_"+str(self.cnt_round), "generator_"+str(self.cnt_gen))
        if not os.path.exists(self.path_to_log):
            os.makedirs(self.path_to_log)  

        self.env = AnonEnv(
                              path_to_log = self.path_to_log,
                              path_to_work_directory = self.dic_path["PATH_TO_WORK_DIRECTORY"],
                              dic_traffic_env_conf = self.dic_traffic_env_conf)        
        self.env.reset()

        # every generator's output
        # generator for pretraining
        # Todo pretrain with intersection_id
        if self.dic_exp_conf["PRETRAIN"]:

            self.agent_name = self.dic_exp_conf["PRETRAIN_MODEL_NAME"]
            self.agent = DIC_AGENTS[self.agent_name](
                dic_agent_conf=self.dic_agent_conf,
                dic_traffic_env_conf=self.dic_traffic_env_conf,
                dic_path=self.dic_path,
                cnt_round=self.cnt_round,
                best_round=best_round,
            )

        else:

            start_time = time.time()

            for i in range(dic_traffic_env_conf['NUM_AGENTS']):
                agent_name = self.dic_exp_conf["MODEL_NAME"]
                #the CoLight_Signal needs to know the lane adj in advance, from environment's intersection list
                if agent_name=='CoLight_Signal':
                    agent = DIC_AGENTS[agent_name](
                        dic_agent_conf=self.dic_agent_conf,
                        dic_traffic_env_conf=self.dic_traffic_env_conf,
                        dic_path=self.dic_path,
                        cnt_round=self.cnt_round, 
                        best_round=best_round,
                        inter_info=self.env.list_intersection,
                        intersection_id=str(i)
                    )      
                else:              
                    agent = DIC_AGENTS[agent_name](
                        dic_agent_conf=self.dic_agent_conf,
                        dic_traffic_env_conf=self.dic_traffic_env_conf,
                        dic_path=self.dic_path,
                        cnt_round=self.cnt_round, 
                        best_round=best_round,
                        intersection_id=str(i)
                    )
                self.agents[i] = agent
            print("Create intersection agent time: ", time.time()-start_time)


    def generate(self):

        reset_env_start_time = time.time()
        done = False
        state = self.env.reset()
        step_num = 0
        reset_env_time = time.time() - reset_env_start_time

        running_start_time = time.time()


        # max_t = int(self.dic_exp_conf["RUN_COUNTS"]/self.dic_traffic_env_conf["MIN_ACTION_TIME"]) # 360 -wz
        # max_t = 5   # 实验改短 gaiduan
        # print(f'\n\n\n\n\n gaiduan! -wz \n\n\n\n\n\n')
        # while not done and step_num < max_t:

        while not done and step_num < int(self.dic_exp_conf["RUN_COUNTS"]/self.dic_traffic_env_conf["MIN_ACTION_TIME"]):

            myprint(f'step #{step_num} generator #{self.cnt_gen} total prog @{self.cnt_round}')


            action_list = []
            step_start_time = time.time()

            for i in range(self.dic_traffic_env_conf["NUM_AGENTS"]):

                if self.dic_exp_conf["MODEL_NAME"] in ["CoLight","GCN", "SimpleDQNOne"]:
                    one_state = state
                    if self.dic_exp_conf["MODEL_NAME"] == 'CoLight':
                        action, _ = self.agents[i].choose_action(step_num, one_state)
                    elif self.dic_exp_conf["MODEL_NAME"] == 'GCN':
                        action = self.agents[i].choose_action(step_num, one_state)
                    else: # simpleDQNOne
                        if True:
                            action = self.agents[i].choose_action(step_num, one_state)
                        else:
                            action = self.agents[i].choose_action_separate(step_num, one_state)
                    action_list = action
                else:
                    one_state = state[i]
                    action = self.agents[i].choose_action(step_num, one_state)
                    action_list.append(action)

            next_state, reward, done, _ = self.env.step(action_list)

            print("time: {0}, running_time: {1}".format(self.env.get_current_time()-self.dic_traffic_env_conf["MIN_ACTION_TIME"],
                                                        time.time()-step_start_time))
            state = next_state
            step_num += 1
        running_time = time.time() - running_start_time

        log_start_time = time.time()
        print("start logging")
        self.env.bulk_log_multi_process()
        log_time = time.time() - log_start_time

        self.env.end_sumo()
        print("reset_env_time: ", reset_env_time)
        print("running_time: ", running_time)
        print("log_time: ", log_time)
