# Supplementary material
Source: ML conference proceedings conference paper supplement (https://proceedings.neurips.cc/paper_files/paper/2021/hash/654516d1b4df6917094de807156adc14-Abstract.html)
Supplement: Supplementary file 1 [file 654516d1b4df6917094de807156adc14-Supplemental.zip › neurips-supplementary/codes/requirements.txt]

networkx
pandas
matplotlib
keras==2.1
tensorflow==1.11
GPUtil
h5py==2.10.0
tqdm
