# Supplementary material
Source: ML conference proceedings conference paper supplement (https://proceedings.neurips.cc/paper_files/paper/2021/hash/654516d1b4df6917094de807156adc14-Abstract.html)
Supplement: Supplementary file 1 [file 654516d1b4df6917094de807156adc14-Supplemental.zip › neurips-supplementary/codes/run_baseline_batch.py]

import run_baseline
import summary

memo = "multi_phase/sumo/fixedtime_no_change_lane_optimal"
run_baseline.main(memo)
print("********************** run_baseline ends **********************")
summary.summary_detail_baseline(memo)
print("********************** run_baseline ends **********************")
