# Supplementary material
Source: ML conference proceedings conference paper supplement (https://proceedings.neurips.cc/paper_files/paper/2021/hash/654516d1b4df6917094de807156adc14-Abstract.html)
Supplement: Supplementary file 1 [file 654516d1b4df6917094de807156adc14-Supplemental.zip › neurips-supplementary/codes/run_batch.py]

import runexp
import testexp
import summary


memo = "multi_phase/sumo/pipeline"
runexp.main(memo)
print("****************************** runexp ends (generate, train, test)!! ******************************")
summary.main(memo)
print("****************************** summary_detail ends ******************************")
