# Supplementary material
Source: ML conference proceedings conference paper supplement (https://proceedings.neurips.cc/paper_files/paper/2021/hash/654516d1b4df6917094de807156adc14-Abstract.html)
Supplement: Supplementary file 1 [file 654516d1b4df6917094de807156adc14-Supplemental.zip › neurips-supplementary/codes/runexp.py]

import config
import copy
from pipeline import Pipeline
import os
import time

# from multiprocessing import Process
from config import Process


import argparse
import os
import matplotlib
# matplotlib.use('TkAgg')

from script import get_traffic_volume


def null(*a): pass
myprint=print; print=null

def p(*a):
    myprint(f'''\n\n\n{(
        a
        )}\n\n\n''')
    return


multi_process = True
TOP_K_ADJACENCY=-1
TOP_K_ADJACENCY_LANE=-1
PRETRAIN=False
NUM_ROUNDS=100
EARLY_STOP=False 
NEIGHBOR=False
SAVEREPLAY=False
ADJACENCY_BY_CONNECTION_OR_GEO=False
hangzhou_archive=True
ANON_PHASE_REPRE=[]

def parse_args():
    parser = argparse.ArgumentParser()
    # The file folder to create/log in
    parser.add_argument("--memo", type=str, default='0515_afternoon_Colight_6_6_bi')#1_3,2_2,3_3,4_4
    parser.add_argument("--env", type=int, default=1) #env=1 means you will run CityFlow
    parser.add_argument("--gui", type=bool, default=False)

    parser.add_argument("--road_net", type=str, default='6_6')#'1_2') # which road net you are going to run
    parser.add_argument("--volume", type=str, default='300')#'300'
    parser.add_argument("--suffix", type=str, default="0.3_bi")#0.3


    global hangzhou_archive
    hangzhou_archive=False
    global TOP_K_ADJACENCY
    TOP_K_ADJACENCY=5
    global TOP_K_ADJACENCY_LANE
    TOP_K_ADJACENCY_LANE=5
    global NUM_ROUNDS
    NUM_ROUNDS=100
    global EARLY_STOP
    EARLY_STOP=False
    global NEIGHBOR
    # TAKE CARE
    NEIGHBOR=False
    global SAVEREPLAY # if you want to relay your simulation, set it to be True
    SAVEREPLAY=False
    global ADJACENCY_BY_CONNECTION_OR_GEO
    # TAKE CARE
    ADJACENCY_BY_CONNECTION_OR_GEO=False

    #modify:TOP_K_ADJACENCY in line 154
    global PRETRAIN
    PRETRAIN=False
    parser.add_argument("--mod", type=str, default='CoLight')#SimpleDQN,SimpleDQNOne,GCN,CoLight,Lit
    parser.add_argument("--cnt",type=int, default=3600)#3600
    parser.add_argument("--gen",type=int, default=4)#4
    parser.add_argument("--rounds",type=int, default=100)#100

    parser.add_argument("-all", action="store_true", default=False)
    parser.add_argument("--workers",type=int, default=7)
    parser.add_argument("--onemodel",type=bool, default=False)

    parser.add_argument("--visible_gpu", type=str, default="-1")

    parser.add_argument("--onlyEva", type=int, default=0)
    parser.add_argument("--onlyEva_modelPath", type=str, default="")
    parser.add_argument("--onlyEva_cntRound", type=int, default=-1)


    global ANON_PHASE_REPRE
    tt=parser.parse_args()
    if 'CoLight_Signal' in tt.mod:
        #12dim
        ANON_PHASE_REPRE={
            # 0: [0, 0, 0, 0, 0, 0, 0, 0],
            1: [0, 1, 1, 0, 1, 1, 0, 0, 1, 0, 0, 1],# 'WSES',
            2: [0, 0, 1, 0, 0, 1, 0, 1, 1, 0, 1, 1],# 'NSSS',
            3: [1, 0, 1, 1, 0, 1, 0, 0, 1, 0, 0, 1],# 'WLEL',
            4: [0, 0, 1, 0, 0, 1, 1, 0, 1, 1, 0, 1]# 'NLSL',
        }
    else:
        #12dim
        ANON_PHASE_REPRE={
            1: [0, 1, 0, 1, 0, 0, 0, 0],
            2: [0, 0, 0, 0, 0, 1, 0, 1],
            3: [1, 0, 1, 0, 0, 0, 0, 0],
            4: [0, 0, 0, 0, 1, 0, 1, 0]
        }
    print('agent_name:%s',tt.mod)
    print('ANON_PHASE_REPRE:',ANON_PHASE_REPRE)
    

    return parser.parse_args()


def memo_rename(traffic_file_list):
    new_name = ""
    for traffic_file in traffic_file_list:
        if "synthetic" in traffic_file:
            sta = traffic_file.rfind("-") + 1
            print(traffic_file, int(traffic_file[sta:-4]))
            new_name = new_name + "syn" + traffic_file[sta:-4] + "_"
        elif "cross" in traffic_file:
            sta = traffic_file.find("equal_") + len("equal_")
            end = traffic_file.find(".xml")
            new_name = new_name + "uniform" + traffic_file[sta:end] + "_"
        elif "flow" in traffic_file:
            new_name = traffic_file[:-4]
    new_name = new_name[:-1]
    return new_name

def merge(dic_tmp, dic_to_change):
    dic_result = copy.deepcopy(dic_tmp)
    dic_result.update(dic_to_change)

    return dic_result

def check_all_workers_working(list_cur_p):
    for i in range(len(list_cur_p)):
        if not list_cur_p[i].is_alive():
            return i

    return -1

def pipeline_wrapper(dic_exp_conf, dic_agent_conf, dic_traffic_env_conf, dic_path):
    ppl = Pipeline(dic_exp_conf=dic_exp_conf, # experiment config
                   dic_agent_conf=dic_agent_conf, # RL agent config
                   dic_traffic_env_conf=dic_traffic_env_conf, # the simolation configuration
                   dic_path=dic_path # where should I save the logs?
                   )
    global multi_process
    ppl.run(multi_process=multi_process)

    print("pipeline_wrapper end")
    return


def main(args, memo, env, road_net, gui, volume, suffix, mod, cnt, gen, r_all, workers, onemodel):

    # main(args.memo, args.env, args.road_net, args.gui, args.volume, args.ratio, args.mod, args.cnt, args.gen)
    #Jinan_3_4


    NUM_COL = int(road_net.split('_')[0])
    NUM_ROW = int(road_net.split('_')[1])
    num_intersections = NUM_ROW * NUM_COL
    print('num_intersections:',num_intersections)

    ENVIRONMENT = ["sumo", "anon"][env]

    if r_all:
        traffic_file_list = [ENVIRONMENT+"_"+road_net+"_%d_%s" %(v,suffix) for v in range(100,400,100)]
    else:
        traffic_file_list=["{0}_{1}_{2}_{3}".format(ENVIRONMENT, road_net, volume, suffix)]


    if env:
        traffic_file_list = [i+ ".json" for i in traffic_file_list ]
    else:
        traffic_file_list = [i+ ".xml" for i in traffic_file_list ]

    process_list = []
    n_workers = workers     #len(traffic_file_list)
    multi_process = True

    global PRETRAIN
    global NUM_ROUNDS
    global EARLY_STOP


    # p(traffic_file_list)
    # raise

    for traffic_file in traffic_file_list:
        dic_exp_conf_extra = {

            "RUN_COUNTS": cnt,
            "MODEL_NAME": mod,
            "TRAFFIC_FILE": [traffic_file], # here: change to multi_traffic

            "ROADNET_FILE": "roadnet_{0}.json".format(road_net),

            "NUM_ROUNDS": args.rounds,
            "NUM_GENERATORS": gen,

            "MODEL_POOL": False,
            "NUM_BEST_MODEL": 3,

            "PRETRAIN": PRETRAIN,#
            "PRETRAIN_MODEL_NAME":mod,
            "PRETRAIN_NUM_ROUNDS": 0,
            "PRETRAIN_NUM_GENERATORS": 15,

            "AGGREGATE": False,
            "DEBUG": False,
            "EARLY_STOP": EARLY_STOP,
        }

        dic_agent_conf_extra = {

            "RUN_COUNTS": cnt,
            "NUM_GENERATORS": gen,
            "EPOCHS": 100,
            "SAMPLE_SIZE": 1000,
            "MAX_MEMORY_LEN": 10000,
            "UPDATE_Q_BAR_EVERY_C_ROUND": False,
            "UPDATE_Q_BAR_FREQ": 5,
            # network

            "N_LAYER": 2,
            "TRAFFIC_FILE": traffic_file,
        }

        global TOP_K_ADJACENCY
        global TOP_K_ADJACENCY_LANE
        global NEIGHBOR
        global SAVEREPLAY
        global ADJACENCY_BY_CONNECTION_OR_GEO
        global ANON_PHASE_REPRE
        dic_traffic_env_conf_extra = {
            "USE_LANE_ADJACENCY": True,
            "ONE_MODEL": onemodel,
            "NUM_AGENTS": num_intersections,
            "NUM_INTERSECTIONS": num_intersections,
            "ACTION_PATTERN": "set",
            "MEASURE_TIME": 10,
            "IF_GUI": gui,
            "DEBUG": False,
            "TOP_K_ADJACENCY": TOP_K_ADJACENCY,
            "ADJACENCY_BY_CONNECTION_OR_GEO": ADJACENCY_BY_CONNECTION_OR_GEO,
            "TOP_K_ADJACENCY_LANE": TOP_K_ADJACENCY_LANE,
            "SIMULATOR_TYPE": ENVIRONMENT,
            "BINARY_PHASE_EXPANSION": True,
            "FAST_COMPUTE": True,

            "NEIGHBOR": NEIGHBOR,
            "MODEL_NAME": mod,


            "SAVEREPLAY": SAVEREPLAY,
            "NUM_ROW": NUM_ROW,
            "NUM_COL": NUM_COL,

            "TRAFFIC_FILE": traffic_file,
            "VOLUME": volume,
            "ROADNET_FILE": "roadnet_{0}.json".format(road_net),

            "phase_expansion": {
                1: [0, 1, 0, 1, 0, 0, 0, 0],
                2: [0, 0, 0, 0, 0, 1, 0, 1],
                3: [1, 0, 1, 0, 0, 0, 0, 0],
                4: [0, 0, 0, 0, 1, 0, 1, 0],
                5: [1, 1, 0, 0, 0, 0, 0, 0],
                6: [0, 0, 1, 1, 0, 0, 0, 0],
                7: [0, 0, 0, 0, 0, 0, 1, 1],
                8: [0, 0, 0, 0, 1, 1, 0, 0]
            },

            "phase_expansion_4_lane": {
                1: [1, 1, 0, 0],
                2: [0, 0, 1, 1],
            },


            "LIST_STATE_FEATURE": [
                "cur_time",
                "cur_phase",
                # "time_this_phase",
                # "vehicle_position_img",
                # "vehicle_speed_img",
                # "vehicle_acceleration_img",
                # "vehicle_waiting_time_img",
                "lane_num_vehicle",
                # "lane_num_vehicle_been_stopped_thres01",
                # "lane_num_vehicle_been_stopped_thres1",
                # "lane_queue_length",
                # "lane_num_vehicle_left",
                # "lane_sum_duration_vehicle_left",
                # "lane_sum_waiting_time",
                # "terminal",
                # "coming_vehicle",
                # "leaving_vehicle",
                # "pressure"

                # "adjacency_matrix",
                # "lane_queue_length",
                # "connectivity",

                # adjacency_matrix_lane
            ],

                "DIC_FEATURE_DIM": dict(
                    D_LANE_QUEUE_LENGTH=(4,),
                    D_LANE_NUM_VEHICLE=(4,),

                    D_COMING_VEHICLE = (12,),
                    D_LEAVING_VEHICLE = (12,),

                    D_LANE_NUM_VEHICLE_BEEN_STOPPED_THRES1=(4,),
                    D_CUR_PHASE=(1,),
                    D_NEXT_PHASE=(1,),
                    D_TIME_THIS_PHASE=(1,),
                    D_TERMINAL=(1,),
                    D_LANE_SUM_WAITING_TIME=(4,),
                    D_VEHICLE_POSITION_IMG=(4, 60,),
                    D_VEHICLE_SPEED_IMG=(4, 60,),
                    D_VEHICLE_WAITING_TIME_IMG=(4, 60,),

                    D_PRESSURE=(1,),

                    D_ADJACENCY_MATRIX=(2,),

                    D_ADJACENCY_MATRIX_LANE=(6,),

                ),

            "DIC_REWARD_INFO": {
                "flickering": 0,#-5,#
                "sum_lane_queue_length": 0,
                "sum_lane_wait_time": 0,
                "sum_lane_num_vehicle_left": 0,#-1,#
                "sum_duration_vehicle_left": 0,
                "sum_num_vehicle_been_stopped_thres01": 0,
                "sum_num_vehicle_been_stopped_thres1": -0.25,
                "pressure": 0  # -0.25
            },

            "LANE_NUM": {
                "LEFT": 1,
                "RIGHT": 1,
                "STRAIGHT": 1
            },

            "PHASE": {
                "sumo": {
                    0: [0, 1, 0, 1, 0, 0, 0, 0],# 'WSES',
                    1: [0, 0, 0, 0, 0, 1, 0, 1],# 'NSSS',
                    2: [1, 0, 1, 0, 0, 0, 0, 0],# 'WLEL',
                    3: [0, 0, 0, 0, 1, 0, 1, 0]# 'NLSL',
                },

                # "anon": {
                #     # 0: [0, 0, 0, 0, 0, 0, 0, 0],
                #     1: [0, 1, 1, 0, 1, 1, 0, 0, 1, 0, 0, 1],# 'WSES',
                #     2: [0, 0, 1, 0, 0, 1, 0, 1, 1, 0, 1, 1],# 'NSSS',
                #     3: [1, 0, 1, 1, 0, 1, 0, 0, 1, 0, 0, 1],# 'WLEL',
                #     4: [0, 0, 1, 0, 0, 1, 1, 0, 1, 1, 0, 1]# 'NLSL',
                #     # 'WSWL',
                #     # 'ESEL',
                #     # 'WSES',
                #     # 'NSSS',
                #     # 'NSNL',
                #     # 'SSSL',
                # },
                "anon":ANON_PHASE_REPRE,
                # "anon": {
                #     # 0: [0, 0, 0, 0, 0, 0, 0, 0],
                #     1: [0, 1, 0, 1, 0, 0, 0, 0],# 'WSES',
                #     2: [0, 0, 0, 0, 0, 1, 0, 1],# 'NSSS',
                #     3: [1, 0, 1, 0, 0, 0, 0, 0],# 'WLEL',
                #     4: [0, 0, 0, 0, 1, 0, 1, 0]# 'NLSL',
                #     # 'WSWL',
                #     # 'ESEL',
                #     # 'WSES',
                #     # 'NSSS',
                #     # 'NSNL',
                #     # 'SSSL',
                # },
            }
        }

        ## ==================== multi_phase ====================
        global hangzhou_archive
        if hangzhou_archive:
            template='Archive+2'
        elif volume=='jinan':
            template="Jinan"
        elif volume=='hangzhou':
            template='Hangzhou'
        elif volume=='newyork':
            template='NewYork'
        elif volume=='chacha':
            template='Chacha'
        elif volume=='dynamic_attention':
            template='dynamic_attention'
        elif dic_traffic_env_conf_extra["LANE_NUM"] == config._LS:
            template = "template_ls"
        elif dic_traffic_env_conf_extra["LANE_NUM"] == config._S:
            template = "template_s"
        elif dic_traffic_env_conf_extra["LANE_NUM"] == config._LSR:
            template = "template_lsr"
        else:
            raise ValueError

        if dic_traffic_env_conf_extra['NEIGHBOR']:
            list_feature = dic_traffic_env_conf_extra["LIST_STATE_FEATURE"].copy()
            for feature in list_feature:
                for i in range(4):
                    dic_traffic_env_conf_extra["LIST_STATE_FEATURE"].append(feature+"_"+str(i))

        if mod in ['CoLight','GCN','SimpleDQNOne']:
            dic_traffic_env_conf_extra["NUM_AGENTS"] = 1
            dic_traffic_env_conf_extra['ONE_MODEL'] = False
            if "adjacency_matrix" not in dic_traffic_env_conf_extra['LIST_STATE_FEATURE'] and \
                "adjacency_matrix_lane" not in dic_traffic_env_conf_extra['LIST_STATE_FEATURE'] and \
                mod not in ['SimpleDQNOne']:
                dic_traffic_env_conf_extra['LIST_STATE_FEATURE'].append("adjacency_matrix")
                dic_traffic_env_conf_extra['LIST_STATE_FEATURE'].append("adjacency_matrix_lane")
                if dic_traffic_env_conf_extra['ADJACENCY_BY_CONNECTION_OR_GEO']:
                    TOP_K_ADJACENCY = 5
                    dic_traffic_env_conf_extra['LIST_STATE_FEATURE'].append("connectivity")
                    dic_traffic_env_conf_extra['DIC_FEATURE_DIM']['D_CONNECTIVITY'] = \
                        (5,)
                    dic_traffic_env_conf_extra['DIC_FEATURE_DIM']['D_ADJACENCY_MATRIX'] = \
                        (5,)
                else:
                    dic_traffic_env_conf_extra['DIC_FEATURE_DIM']['D_ADJACENCY_MATRIX'] = \
                        (dic_traffic_env_conf_extra['TOP_K_ADJACENCY'],)

                if dic_traffic_env_conf_extra['USE_LANE_ADJACENCY']:
                    dic_traffic_env_conf_extra['DIC_FEATURE_DIM']['D_ADJACENCY_MATRIX_LANE'] = \
                        (dic_traffic_env_conf_extra['TOP_K_ADJACENCY_LANE'],)
        else:
            dic_traffic_env_conf_extra["NUM_AGENTS"] = dic_traffic_env_conf_extra["NUM_INTERSECTIONS"]

        if dic_traffic_env_conf_extra['BINARY_PHASE_EXPANSION']:
            dic_traffic_env_conf_extra['DIC_FEATURE_DIM']['D_CUR_PHASE'] = (8,)
            if dic_traffic_env_conf_extra['NEIGHBOR']:
                dic_traffic_env_conf_extra['DIC_FEATURE_DIM']['D_CUR_PHASE_0'] = (8,)
                dic_traffic_env_conf_extra['DIC_FEATURE_DIM']['D_LANE_NUM_VEHICLE_0'] = (4,)
                dic_traffic_env_conf_extra['DIC_FEATURE_DIM']['D_CUR_PHASE_1'] = (8,)
                dic_traffic_env_conf_extra['DIC_FEATURE_DIM']['D_LANE_NUM_VEHICLE_1'] = (4,)
                dic_traffic_env_conf_extra['DIC_FEATURE_DIM']['D_CUR_PHASE_2'] = (8,)
                dic_traffic_env_conf_extra['DIC_FEATURE_DIM']['D_LANE_NUM_VEHICLE_2'] = (4,)
                dic_traffic_env_conf_extra['DIC_FEATURE_DIM']['D_CUR_PHASE_3'] = (8,)
                dic_traffic_env_conf_extra['DIC_FEATURE_DIM']['D_LANE_NUM_VEHICLE_3'] = (4,)
            else:

                dic_traffic_env_conf_extra['DIC_FEATURE_DIM']['D_CUR_PHASE_0'] = (1,)
                dic_traffic_env_conf_extra['DIC_FEATURE_DIM']['D_LANE_NUM_VEHICLE_0'] = (4,)
                dic_traffic_env_conf_extra['DIC_FEATURE_DIM']['D_CUR_PHASE_1'] = (1,)
                dic_traffic_env_conf_extra['DIC_FEATURE_DIM']['D_LANE_NUM_VEHICLE_1'] = (4,)
                dic_traffic_env_conf_extra['DIC_FEATURE_DIM']['D_CUR_PHASE_2'] = (1,)
                dic_traffic_env_conf_extra['DIC_FEATURE_DIM']['D_LANE_NUM_VEHICLE_2'] = (4,)
                dic_traffic_env_conf_extra['DIC_FEATURE_DIM']['D_CUR_PHASE_3'] = (1,)
                dic_traffic_env_conf_extra['DIC_FEATURE_DIM']['D_LANE_NUM_VEHICLE_3'] = (4,)


        print(traffic_file)
        prefix_intersections = str(road_net)
        dic_path_extra = {
            "PATH_TO_MODEL": os.path.join("model", memo, traffic_file + "_" + time.strftime('%m_%d_%H_%M_%S', time.localtime(time.time()))),
            "PATH_TO_WORK_DIRECTORY": os.path.join("records", memo, traffic_file + "_" + time.strftime('%m_%d_%H_%M_%S', time.localtime(time.time()))),

            "PATH_TO_DATA": os.path.join("data", template, prefix_intersections),
            "PATH_TO_PRETRAIN_MODEL": os.path.join("model", "initial", traffic_file),
            "PATH_TO_PRETRAIN_WORK_DIRECTORY": os.path.join("records", "initial", traffic_file),
            "PATH_TO_ERROR": os.path.join("errors", memo)
        }

        deploy_dic_exp_conf = merge(config.DIC_EXP_CONF, dic_exp_conf_extra)
        deploy_dic_agent_conf = merge(getattr(config, "DIC_{0}_AGENT_CONF".format(mod.upper())),
                                      dic_agent_conf_extra)
        deploy_dic_traffic_env_conf = merge(config.dic_traffic_env_conf, dic_traffic_env_conf_extra)

        # TODO add agent_conf for different agents
        # deploy_dic_agent_conf_all = [deploy_dic_agent_conf for i in range(deploy_dic_traffic_env_conf["NUM_AGENTS"])]

        deploy_dic_path = merge(config.DIC_PATH, dic_path_extra)

        deploy_dic_exp_conf['pargs'] = vars(args)
        if multi_process:
            ppl = Process(target=pipeline_wrapper,
                          args=(deploy_dic_exp_conf,
                                deploy_dic_agent_conf,
                                deploy_dic_traffic_env_conf,
                                deploy_dic_path))
            process_list.append(ppl)
        else:
            pipeline_wrapper(dic_exp_conf=deploy_dic_exp_conf,
                             dic_agent_conf=deploy_dic_agent_conf,
                             dic_traffic_env_conf=deploy_dic_traffic_env_conf,
                             dic_path=deploy_dic_path)

    if multi_process:
        for i in range(0, len(process_list), n_workers):
            i_max = min(len(process_list), i + n_workers)
            for j in range(i, i_max):
                print(j)
                print("start_traffic")
                process_list[j].start()
                print("after_traffic")
            for k in range(i, i_max):
                print("traffic to join", k)
                process_list[k].join()
                print("traffic finish join", k)


    return memo

args = parse_args()

# if args.disable_process:


if __name__ == "__main__":
    #memo = "multi_phase/optimal_search_new/new_headway_anon"

    # os.environ["CUDA_VISIBLE_DEVICES"] = "0"
    

    main(args, args.memo, args.env, args.road_net, args.gui, args.volume,
         args.suffix, args.mod, args.cnt, args.gen, args.all, args.workers,
         args.onemodel)
