# Supplementary material
Source: ML conference proceedings conference paper supplement (https://proceedings.neurips.cc/paper_files/paper/2021/hash/654516d1b4df6917094de807156adc14-Abstract.html)

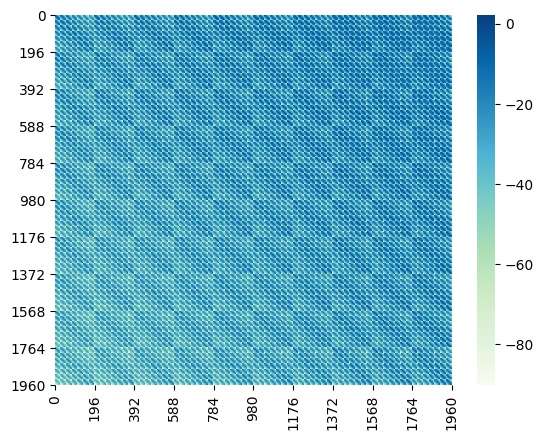

Supplement: Supplementary file 1 [file 654516d1b4df6917094de807156adc14-Supplemental.zip › neurips-supplementary/Attention-figures/newyork - Attn-All.jpg]

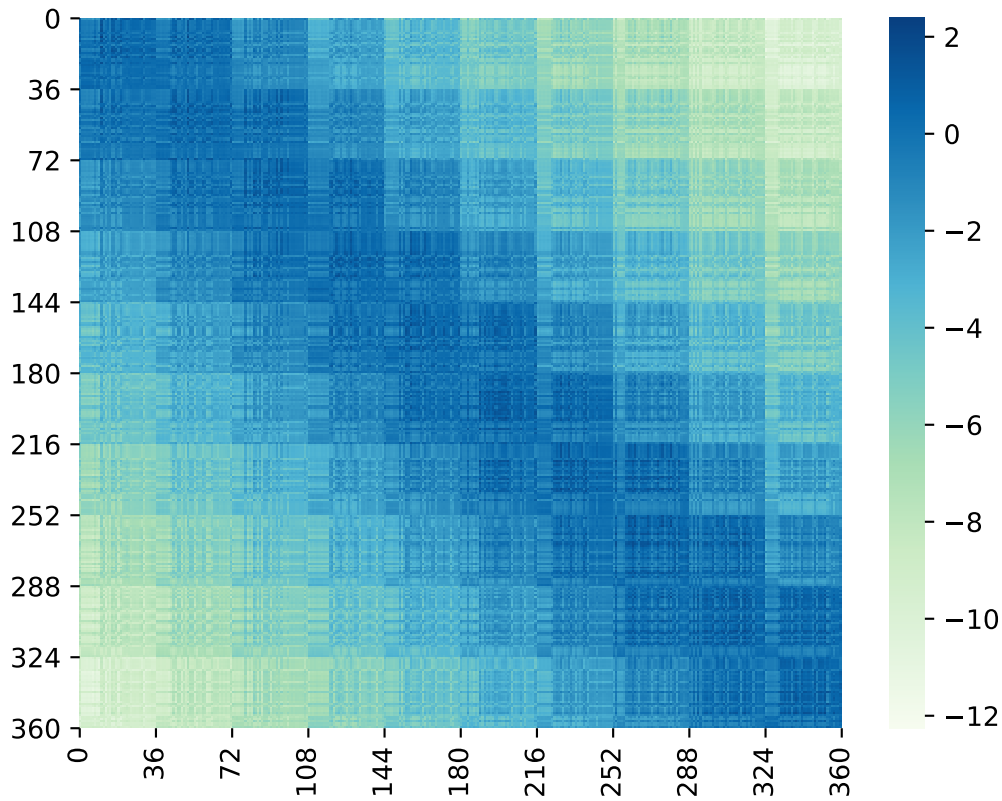

Supplement: Supplementary file 1 [file 654516d1b4df6917094de807156adc14-Supplemental.zip › neurips-supplementary/Attention-figures/6x6- Attn-time decay.pdf]

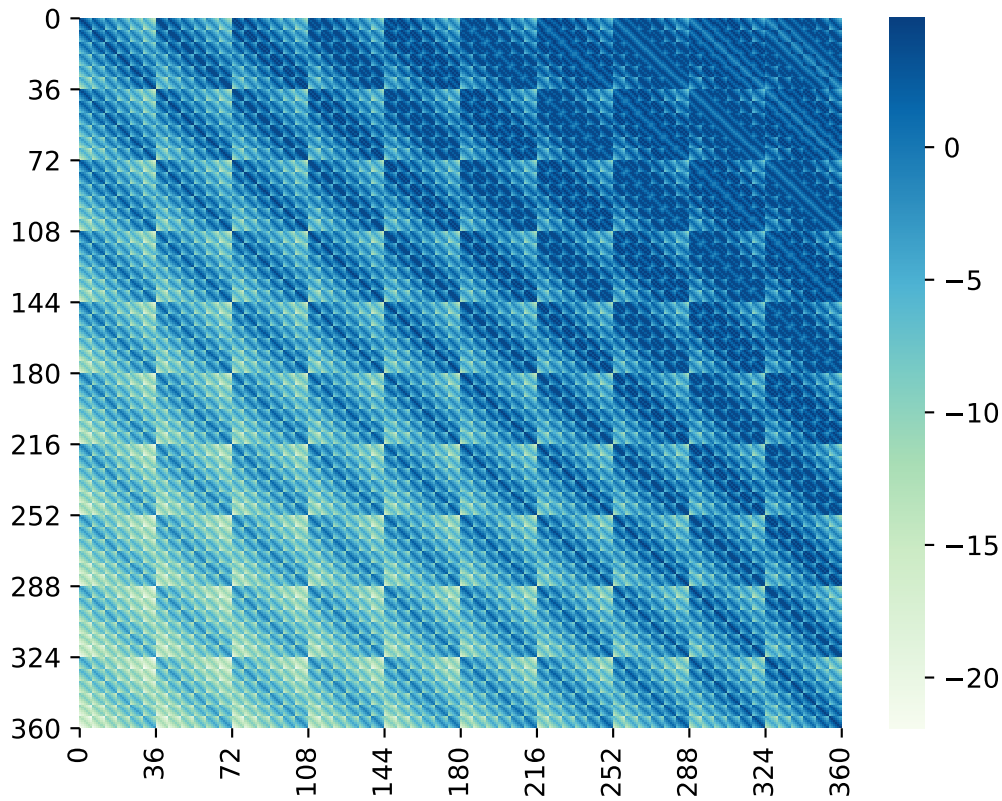

Supplement: Supplementary file 1 [file 654516d1b4df6917094de807156adc14-Supplemental.zip › neurips-supplementary/Attention-figures/6x6- Attn-cone decay.pdf]

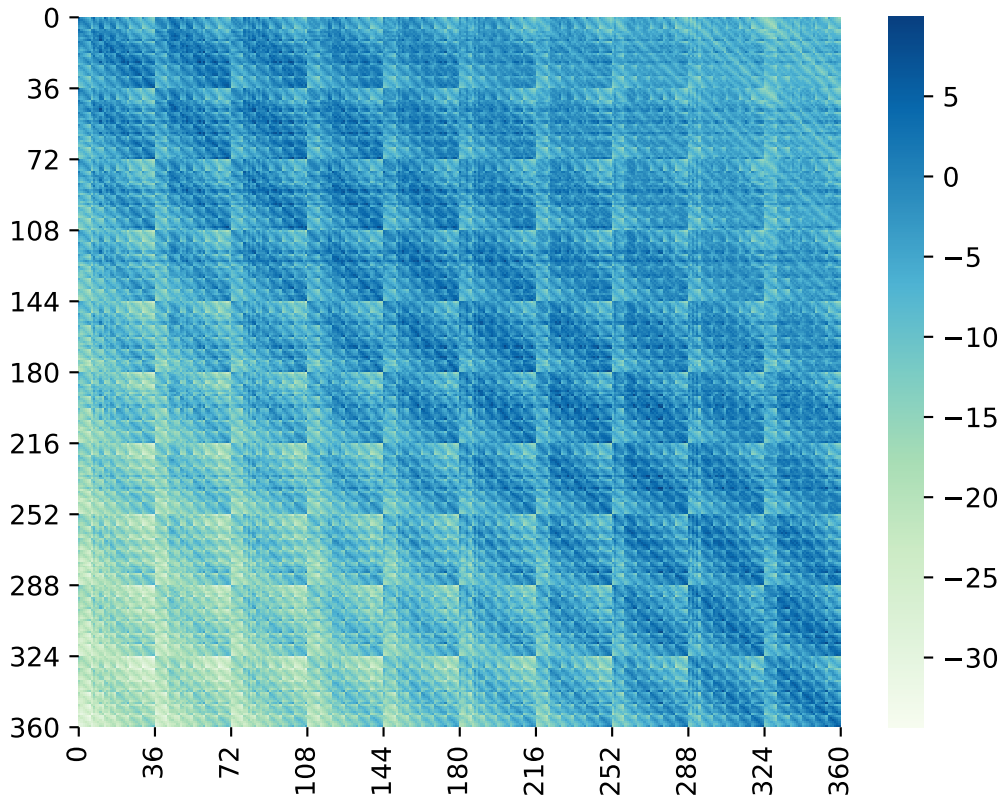

Supplement: Supplementary file 1 [file 654516d1b4df6917094de807156adc14-Supplemental.zip › neurips-supplementary/Attention-figures/6x6 - Attn-All.pdf]

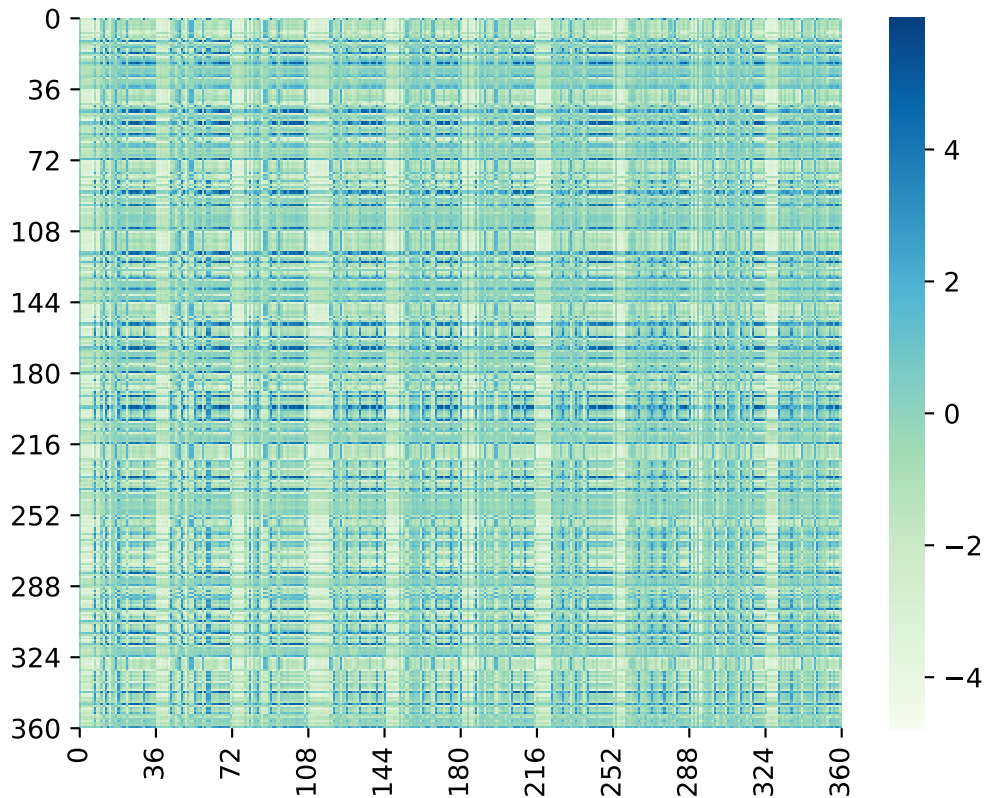

Supplement: Supplementary file 1 [file 654516d1b4df6917094de807156adc14-Supplemental.zip › neurips-supplementary/Attention-figures/6x6- Attn-normal.pdf]

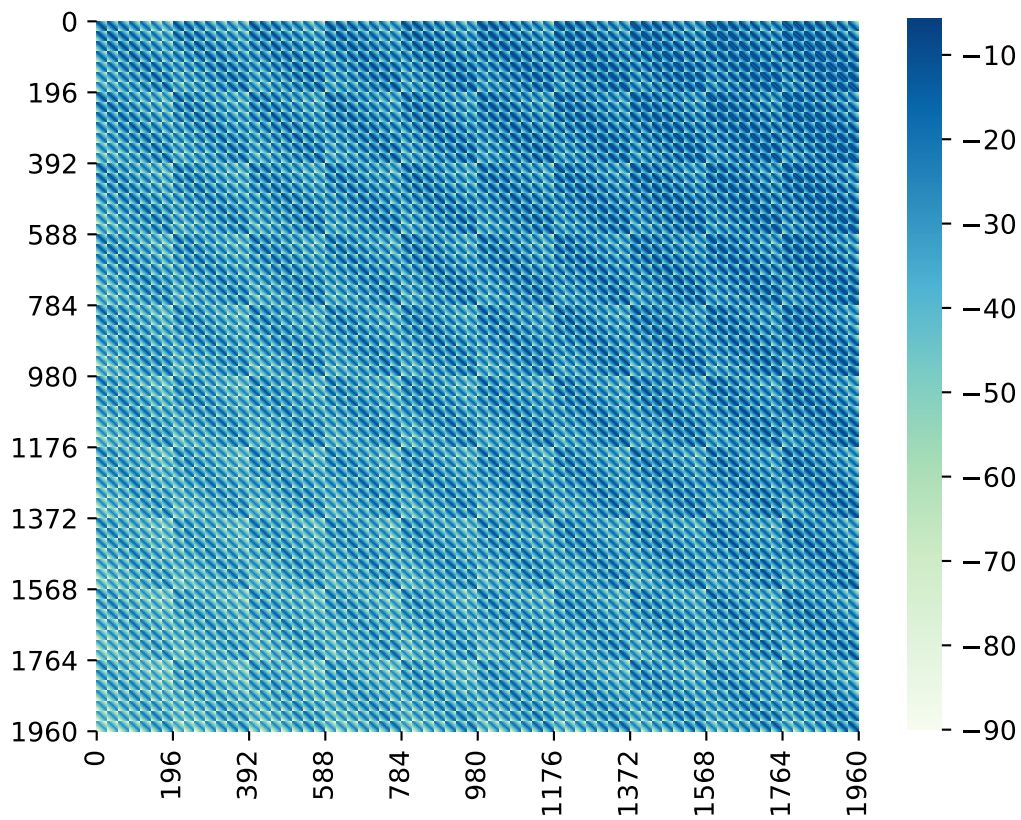

Supplement: Supplementary file 1 [file 654516d1b4df6917094de807156adc14-Supplemental.zip › neurips-supplementary/Attention-figures/newyork - Attn-cone decay.pdf]

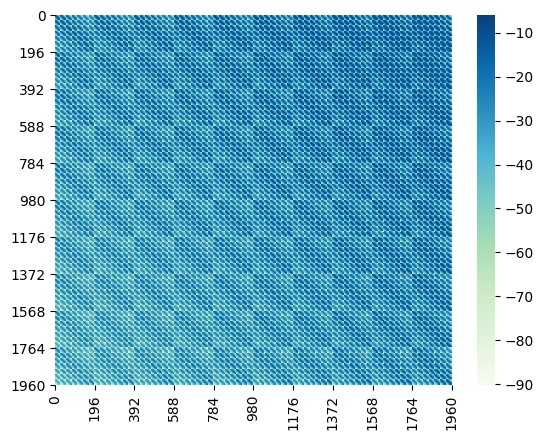

Supplement: Supplementary file 1 [file 654516d1b4df6917094de807156adc14-Supplemental.zip › neurips-supplementary/Attention-figures/newyork - Attn-cone decay.jpg]

comb attention

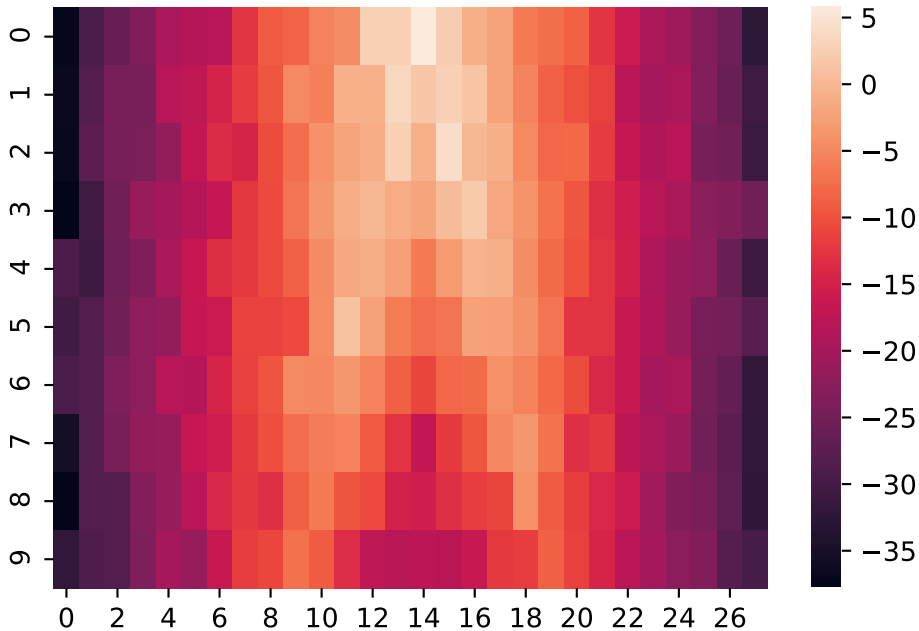

Supplement: Supplementary file 1 [file 654516d1b4df6917094de807156adc14-Supplemental.zip › neurips-supplementary/Attention-figures/6x6 - fig-Tw-attnA.pdf]

Residual Normal Attention

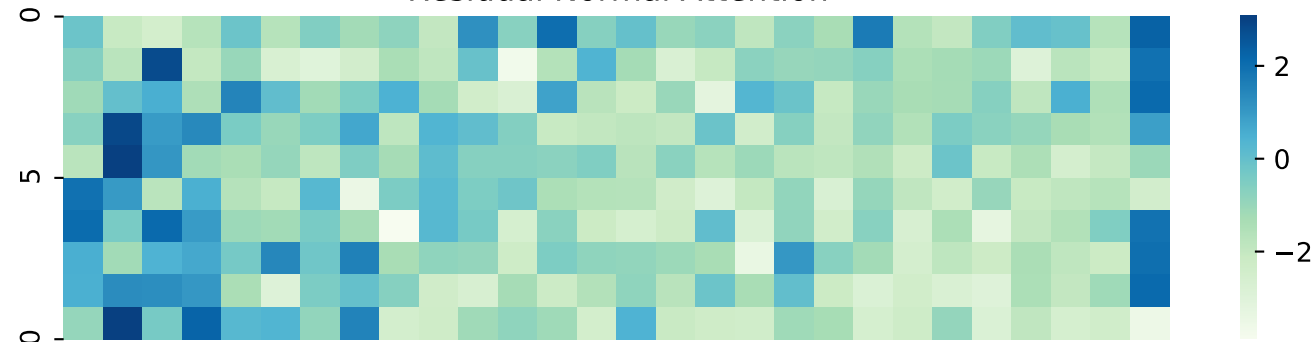

Overall Attention

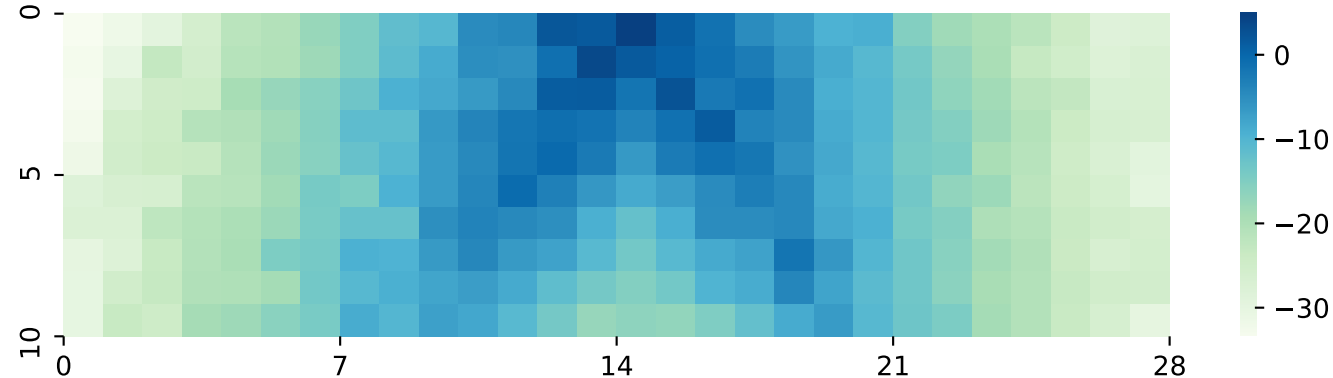

Supplement: Supplementary file 1 [file 654516d1b4df6917094de807156adc14-Supplemental.zip › neurips-supplementary/codes/DePT_src/TwAttn-2.pdf]

Cone Decay Prior

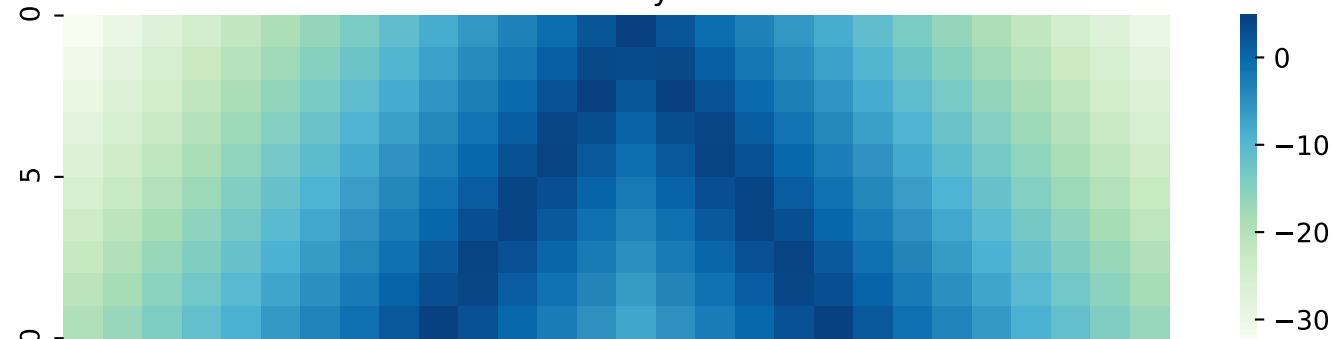

Time Decay Prior + LUT

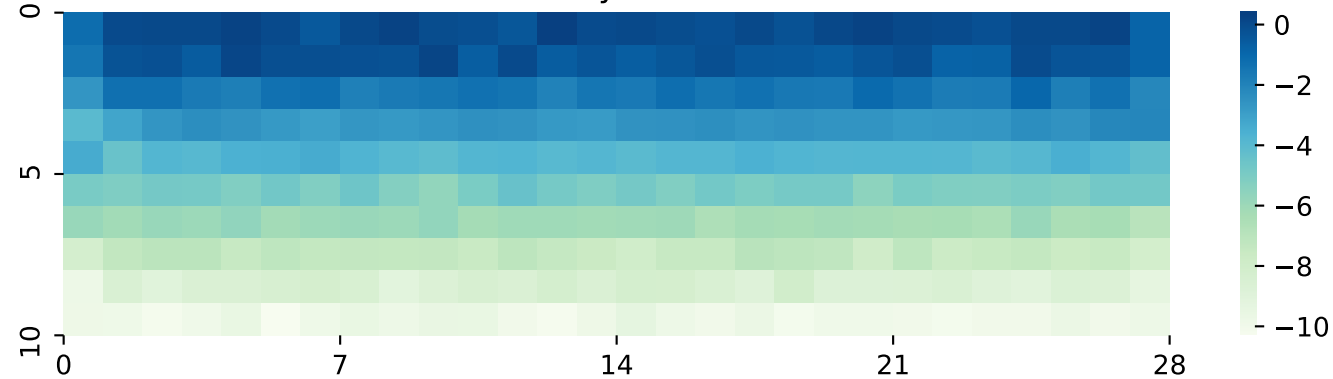

Supplement: Supplementary file 1 [file 654516d1b4df6917094de807156adc14-Supplemental.zip › neurips-supplementary/codes/DePT_src/TwAttn-1.pdf]
